# Supplementary material for: Archaic Adaptive Introgression in Modern Human Reproductive Genes
Source: Research Square preprint supplement (doi:10.21203/rs.3.rs-5544119/v1), 2025-03-19
Supplement: Supplementary file 1 [file 00b516a1b5bf17053e4689aa.xlsx]

## Sheet: README
README: FUMA GWAS SNP2GENE (Watanabe et al., 2017; Watanabe et al., 2019) output for all variants listed in Supplemental Table 4 that overlap core haplotype ranges. We downloaded the eQTL table from the results. The variants are sorted in chromosomal order and are in hg19 format.

## Sheet: Supplemental Table 7
uniqID	db	tissue	gene	testedAllele	p	signed_stats	FDR	RiskIncAllele	alignedDirection	chr	pos	symbol	eqtlMapFilt
2:68385097:A:G	TIGER	Nom_Alonso_Pancreatic_islets	ENSG00000221823	G	0.0005582	-3.451	0.0450161	G	-	2	68385097	PPP3R1	1
2:68446936:C:T	TIGER	Nom_Alonso_Pancreatic_islets	ENSG00000221823	C	0.0004531	3.507	0.0365403	T	-	2	68446936	PPP3R1	1
2:68457573:C:T	TIGER	Nom_Alonso_Pancreatic_islets	ENSG00000221823	C	0.0002229	3.692	0.0179758	T	-	2	68457573	PPP3R1	1
2:68457854:A:G	TIGER	Nom_Alonso_Pancreatic_islets	ENSG00000221823	G	0.0002229	-3.692	0.0179758	G	-	2	68457854	PPP3R1	1
2:68463612:A:G	TIGER	Nom_Alonso_Pancreatic_islets	ENSG00000221823	G	0.0002211	3.694	0.0178306	A	-	2	68463612	PPP3R1	1
2:68467910:A:C	TIGER	Nom_Alonso_Pancreatic_islets	ENSG00000221823	C	0.0002631	-3.649	0.0212177	C	-	2	68467910	PPP3R1	1
2:68475595:A:C	TIGER	Nom_Alonso_Pancreatic_islets	ENSG00000221823	C	0.0002232	3.691	0.018	A	-	2	68475595	PPP3R1	1
2:68477248:C:T	TIGER	Nom_Alonso_Pancreatic_islets	ENSG00000221823	C	0.0002239	-3.69	0.0180565	C	-	2	68477248	PPP3R1	1
2:68478919:A:G	TIGER	Nom_Alonso_Pancreatic_islets	ENSG00000221823	G	0.0002235	-3.691	0.0180242	G	-	2	68478919	PPP3R1	1
2:179728006:C:T	TIGER	Nom_Alonso_Pancreatic_islets	ENSG00000223960	C	0.0002012	3.718	0.0162258	T	-	2	179728006	AC009948.5	1
2:179730852:A:G	TIGER	Nom_Alonso_Pancreatic_islets	ENSG00000223960	G	0.000201	-3.718	0.0162097	G	-	2	179730852	AC009948.5	1
2:179733011:A:T	TIGER	Nom_Alonso_Pancreatic_islets	ENSG00000223960	T	0.0002012	-3.718	0.0162258	T	-	2	179733011	AC009948.5	1
2:179733567:C:T	TIGER	Nom_Alonso_Pancreatic_islets	ENSG00000223960	C	0.0002011	-3.718	0.0162177	C	-	2	179733567	AC009948.5	1
2:179743944:C:T	TIGER	Nom_Alonso_Pancreatic_islets	ENSG00000223960	C	0.0001781	-3.748	0.0143629	C	-	2	179743944	AC009948.5	1
2:179745126:A:C	TIGER	Nom_Alonso_Pancreatic_islets	ENSG00000223960	C	0.0001766	-3.75	0.0142419	C	-	2	179745126	AC009948.5	1
2:179745150:C:T	TIGER	Nom_Alonso_Pancreatic_islets	ENSG00000223960	C	0.0001766	-3.75	0.0142419	C	-	2	179745150	AC009948.5	1
2:179750406:G:T	TIGER	Nom_Alonso_Pancreatic_islets	ENSG00000223960	G	0.0001701	-3.76	0.0137177	G	-	2	179750406	AC009948.5	1
5:416118:A:G	TIGER	Nom_Alonso_Pancreatic_islets	ENSG00000225138	G	4.766e-05	-4.067	0.00384355	A	+	5	416118	CTD-2228K2.7	1
5:416672:A:G	TIGER	Nom_Alonso_Pancreatic_islets	ENSG00000225138	G	4.989e-05	-4.056	0.00402339	A	+	5	416672	CTD-2228K2.7	1
5:418093:A:G	TIGER	Nom_Alonso_Pancreatic_islets	ENSG00000225138	G	2.847e-05	-4.185	0.00229597	G	-	5	418093	CTD-2228K2.7	1
5:418494:A:G	TIGER	Nom_Alonso_Pancreatic_islets	ENSG00000225138	G	4.873e-05	4.062	0.00392984	G	+	5	418494	CTD-2228K2.7	1
5:421403:A:G	TIGER	Nom_Alonso_Pancreatic_islets	ENSG00000225138	G	4.179e-05	-4.097	0.00337016	A	+	5	421403	CTD-2228K2.7	1
5:421426:A:C	TIGER	Nom_Alonso_Pancreatic_islets	ENSG00000188242	C	0.0006175	3.424	0.0497984	C	+	5	421426	CTD-2228K2.5	1
5:421426:A:C	TIGER	Nom_Alonso_Pancreatic_islets	ENSG00000225138	C	2.42e-05	-4.222	0.00195161	C	-	5	421426	CTD-2228K2.7	1
5:421455:G:T	TIGER	Nom_Alonso_Pancreatic_islets	ENSG00000225138	G	4.184e-05	-4.097	0.00337419	T	+	5	421455	CTD-2228K2.7	1
5:430217:C:T	TIGER	Nom_Alonso_Pancreatic_islets	ENSG00000225138	C	1.424e-05	-4.34	0.00114839	T	+	5	430217	CTD-2228K2.7	1
2:68385097:A:G	EyeGEx	EyeGEx	ENSG00000273275	A	1.26629e-06	0.358728	0.000840371	G	-	2	68385097	RP11-474G23.2	1
2:68393144:A:T	EyeGEx	EyeGEx	ENSG00000273275	T	2.04545e-07	0.392359	0.000135746	A	-	2	68393144	RP11-474G23.2	1
2:68394184:C:T	EyeGEx	EyeGEx	ENSG00000273275	C	1.90745e-07	0.393436	0.000126588	T	-	2	68394184	RP11-474G23.2	1
2:68395631:A:G	EyeGEx	EyeGEx	ENSG00000273275	G	1.7267e-07	0.394924	0.000114592	A	-	2	68395631	RP11-474G23.2	1
2:68398919:C:G	EyeGEx	EyeGEx	ENSG00000273275	G	1.65914e-07	0.393796	0.000110109	C	-	2	68398919	RP11-474G23.2	1
2:68399190:C:T	EyeGEx	EyeGEx	ENSG00000273275	C	1.62797e-07	0.394059	0.00010804	T	-	2	68399190	RP11-474G23.2	1
2:68402012:G:T	EyeGEx	EyeGEx	ENSG00000273275	G	1.16639e-07	0.39958	7.74072800815936e-05	T	-	2	68402012	RP11-474G23.2	1
2:68402830:C:G	EyeGEx	EyeGEx	ENSG00000273275	G	1.39867e-07	0.396134	9.28225039924232e-05	C	-	2	68402830	RP11-474G23.2	1
2:68410372:A:C	EyeGEx	EyeGEx	ENSG00000273275	C	1.30161e-07	0.397103	8.63811330918501e-05	A	-	2	68410372	RP11-474G23.2	1
2:68410660:G:T	EyeGEx	EyeGEx	ENSG00000273275	T	1.31244e-07	0.39697	8.70998642566266e-05	G	-	2	68410660	RP11-474G23.2	1
2:68411414:A:G	EyeGEx	EyeGEx	ENSG00000273275	G	1.30433e-07	0.39705	8.65616454434837e-05	A	-	2	68411414	RP11-474G23.2	1
2:68418868:A:T	EyeGEx	EyeGEx	ENSG00000273275	A	1.17671e-07	0.398401	7.80921651804388e-05	T	-	2	68418868	RP11-474G23.2	1
2:68419487:A:G	EyeGEx	EyeGEx	ENSG00000273275	G	1.16986e-07	0.398473	7.76375660595968e-05	A	-	2	68419487	RP11-474G23.2	1
2:68420070:G:T	EyeGEx	EyeGEx	ENSG00000273275	G	1.16251e-07	0.398554	7.7149784521175e-05	T	-	2	68420070	RP11-474G23.2	1
2:68421049:A:G	EyeGEx	EyeGEx	ENSG00000273275	G	1.15207e-07	0.398668	7.64569356421107e-05	A	-	2	68421049	RP11-474G23.2	1
2:68422771:A:G	EyeGEx	EyeGEx	ENSG00000273275	G	1.13226e-07	0.398884	7.51422482576026e-05	A	-	2	68422771	RP11-474G23.2	1
2:68423530:A:G	EyeGEx	EyeGEx	ENSG00000273275	G	1.12331e-07	0.398982	7.45482829829258e-05	A	-	2	68423530	RP11-474G23.2	1
2:68430925:C:T	EyeGEx	EyeGEx	ENSG00000273275	C	1.0527e-07	0.399759	6.98622619723193e-05	T	-	2	68430925	RP11-474G23.2	1
2:68431259:A:G	EyeGEx	EyeGEx	ENSG00000273275	G	1.04922e-07	0.399797	6.96313123459646e-05	A	-	2	68431259	RP11-474G23.2	1
2:68433831:A:G	EyeGEx	EyeGEx	ENSG00000273275	G	1.03511e-07	0.399926	6.86949045218652e-05	A	-	2	68433831	RP11-474G23.2	1
2:68435431:C:G	EyeGEx	EyeGEx	ENSG00000273275	C	1.01701e-07	0.400405	6.74937010054797e-05	G	-	2	68435431	RP11-474G23.2	1
2:68438614:C:T	EyeGEx	EyeGEx	ENSG00000273275	C	1.00721e-07	0.400247	6.68433256209174e-05	T	-	2	68438614	RP11-474G23.2	1
2:68439960:C:T	EyeGEx	EyeGEx	ENSG00000273275	C	6.27712e-08	0.405939	4.16580034075886e-05	T	-	2	68439960	RP11-474G23.2	1
2:68443651:A:G	EyeGEx	EyeGEx	ENSG00000273275	A	6.12057e-08	0.40586	4.06190619131679e-05	G	-	2	68443651	RP11-474G23.2	1
2:68443835:A:T	EyeGEx	EyeGEx	ENSG00000273275	A	6.11719e-08	0.405863	4.0596630598884e-05	T	-	2	68443835	RP11-474G23.2	1
2:68446936:C:T	EyeGEx	EyeGEx	ENSG00000273275	C	9.22417e-08	0.400957	6.12160521532449e-05	T	-	2	68446936	RP11-474G23.2	1
2:68457573:C:T	EyeGEx	EyeGEx	ENSG00000273275	C	9.51562e-08	0.400181	6.31502552739661e-05	T	-	2	68457573	RP11-474G23.2	1
2:68457854:A:G	EyeGEx	EyeGEx	ENSG00000273275	A	9.50829e-08	0.400185	6.31016098497943e-05	G	-	2	68457854	RP11-474G23.2	1
2:68463612:A:G	EyeGEx	EyeGEx	ENSG00000273275	G	9.46938e-08	0.400123	6.2843384276189e-05	A	-	2	68463612	RP11-474G23.2	1
2:68467910:A:C	EyeGEx	EyeGEx	ENSG00000273275	A	9.4511e-08	0.400072	6.27220693575176e-05	C	-	2	68467910	RP11-474G23.2	1
2:68475595:A:C	EyeGEx	EyeGEx	ENSG00000273275	C	9.44264e-08	0.400026	6.26659247069727e-05	A	-	2	68475595	RP11-474G23.2	1
2:68477248:C:T	EyeGEx	EyeGEx	ENSG00000273275	T	7.54495e-08	0.40596	5.00719363036051e-05	C	-	2	68477248	RP11-474G23.2	1
2:68478919:A:G	EyeGEx	EyeGEx	ENSG00000273275	A	3.04075e-07	0.384099	0.000201799	G	-	2	68478919	RP11-474G23.2	1
5:416118:A:G	EyeGEx	EyeGEx	ENSG00000171368	A	3.79597e-07	0.389104	0.000291621	A	+	5	416118	TPPP	1
5:416118:A:G	EyeGEx	EyeGEx	ENSG00000180104	A	1.56384e-14	-0.576762	1.04138731909657e-11	A	-	5	416118	EXOC3	1
5:416118:A:G	EyeGEx	EyeGEx	ENSG00000225138	A	2.28814e-10	0.481508	1.4778380715459e-07	A	+	5	416118	CTD-2228K2.7	1
5:416672:A:G	EyeGEx	EyeGEx	ENSG00000171368	A	3.66573e-07	0.389407	0.000281615	A	+	5	416672	TPPP	1
5:416672:A:G	EyeGEx	EyeGEx	ENSG00000180104	A	1.11669e-14	-0.579477	7.43622624668729e-12	A	-	5	416672	EXOC3	1
5:416672:A:G	EyeGEx	EyeGEx	ENSG00000225138	A	1.98496e-10	0.482851	1.28202359055641e-07	A	+	5	416672	CTD-2228K2.7	1
5:418093:A:G	EyeGEx	EyeGEx	ENSG00000180104	G	3.25447e-09	-0.609167	2.16720622850177e-06	G	-	5	418093	EXOC3	1
5:418093:A:G	EyeGEx	EyeGEx	ENSG00000225138	G	1.10113e-11	-0.694452	7.11185432587751e-09	G	-	5	418093	CTD-2228K2.7	1
5:418494:A:G	EyeGEx	EyeGEx	ENSG00000171368	G	3.35783e-07	0.38967	0.000257961	G	+	5	418494	TPPP	1
5:418494:A:G	EyeGEx	EyeGEx	ENSG00000180104	G	3.86924e-15	-0.587316	2.57659189593641e-12	G	-	5	418494	EXOC3	1
5:418494:A:G	EyeGEx	EyeGEx	ENSG00000225138	G	1.27895e-10	0.486482	8.26033809820915e-08	G	+	5	418494	CTD-2228K2.7	1
5:421193:C:G	EyeGEx	EyeGEx	ENSG00000180104	C	3.29686e-13	-0.539151	2.19543444139855e-10	C	-	5	421193	EXOC3	1
5:421193:C:G	EyeGEx	EyeGEx	ENSG00000221990	C	6.19976e-05	0.30332	0.0391823	C	+	5	421193	C5orf55	1
5:421193:C:G	EyeGEx	EyeGEx	ENSG00000225138	C	8.49191e-10	0.45855	5.48465911095533e-07	C	+	5	421193	CTD-2228K2.7	1
5:421403:A:G	EyeGEx	EyeGEx	ENSG00000171368	A	1.16047e-07	0.410949	8.91517213695397e-05	A	+	5	421403	TPPP	1
5:421403:A:G	EyeGEx	EyeGEx	ENSG00000180104	A	3.19932e-15	-0.598734	2.13048091731381e-12	A	-	5	421403	EXOC3	1
5:421403:A:G	EyeGEx	EyeGEx	ENSG00000225138	A	1.98466e-12	0.538482	1.28182982993798e-09	A	+	5	421403	CTD-2228K2.7	1
5:421426:A:C	EyeGEx	EyeGEx	ENSG00000180104	C	2.68541e-09	-0.638942	1.78825961771991e-06	C	-	5	421426	EXOC3	1
5:421426:A:C	EyeGEx	EyeGEx	ENSG00000225138	C	2.55147e-11	-0.71237	1.64791468372006e-08	C	-	5	421426	CTD-2228K2.7	1
5:421455:G:T	EyeGEx	EyeGEx	ENSG00000171368	T	1.73194e-07	0.396511	0.000133054	T	+	5	421455	TPPP	1
5:421455:G:T	EyeGEx	EyeGEx	ENSG00000180104	T	7.64306e-16	-0.597678	5.08964201139132e-13	T	-	5	421455	EXOC3	1
5:421455:G:T	EyeGEx	EyeGEx	ENSG00000225138	T	7.76403e-11	0.489054	5.01454418113599e-08	T	+	5	421455	CTD-2228K2.7	1
5:422178:A:G	EyeGEx	EyeGEx	ENSG00000171368	A	1.08685e-07	0.380623	8.34959528212571e-05	A	+	5	422178	TPPP	1
5:422178:A:G	EyeGEx	EyeGEx	ENSG00000180104	A	2.62106e-22	-0.668851	1.74540787202735e-19	A	-	5	422178	EXOC3	1
5:422178:A:G	EyeGEx	EyeGEx	ENSG00000221990	A	3.29787e-05	0.29953	0.0208424	A	+	5	422178	C5orf55	1
5:422178:A:G	EyeGEx	EyeGEx	ENSG00000225138	A	8.10614e-06	0.321402	0.0052355	A	+	5	422178	CTD-2228K2.7	1
5:423169:C:T	EyeGEx	EyeGEx	ENSG00000171368	T	1.0983e-07	0.379936	8.43755853922682e-05	T	+	5	423169	TPPP	1
5:423169:C:T	EyeGEx	EyeGEx	ENSG00000180104	T	2.02274e-22	-0.669484	1.34697653585366e-19	T	-	5	423169	EXOC3	1
5:423169:C:T	EyeGEx	EyeGEx	ENSG00000221990	T	3.17381e-05	0.299712	0.0200584	T	+	5	423169	C5orf55	1
5:423169:C:T	EyeGEx	EyeGEx	ENSG00000225138	T	7.80399e-06	0.321504	0.00504035	T	+	5	423169	CTD-2228K2.7	1
5:423595:C:T	EyeGEx	EyeGEx	ENSG00000171368	T	1.23512e-07	0.378136	9.48866184373106e-05	T	+	5	423595	TPPP	1
5:423595:C:T	EyeGEx	EyeGEx	ENSG00000180104	T	1.61773e-22	-0.670301	1.07727357512411e-19	T	-	5	423595	EXOC3	1
5:423595:C:T	EyeGEx	EyeGEx	ENSG00000221990	T	2.65868e-05	0.302295	0.0168028	T	+	5	423595	C5orf55	1
5:423595:C:T	EyeGEx	EyeGEx	ENSG00000225138	T	5.90588e-06	0.325383	0.00381442	T	+	5	423595	CTD-2228K2.7	1
5:423671:C:T	EyeGEx	EyeGEx	ENSG00000171368	T	1.10413e-07	0.379834	8.48234681773332e-05	T	+	5	423671	TPPP	1
5:423671:C:T	EyeGEx	EyeGEx	ENSG00000180104	T	1.95791e-22	-0.669622	1.30380515009998e-19	T	-	5	423671	EXOC3	1
5:423671:C:T	EyeGEx	EyeGEx	ENSG00000221990	T	3.1651e-05	0.299727	0.0200033	T	+	5	423671	C5orf55	1
5:423671:C:T	EyeGEx	EyeGEx	ENSG00000225138	T	7.81315e-06	0.321456	0.00504627	T	+	5	423671	CTD-2228K2.7	1
5:423906:A:G	EyeGEx	EyeGEx	ENSG00000171368	A	1.10914e-07	0.379756	8.52083554420289e-05	A	+	5	423906	TPPP	1
5:423906:A:G	EyeGEx	EyeGEx	ENSG00000180104	A	1.92343e-22	-0.669697	1.28084433904358e-19	A	-	5	423906	EXOC3	1
5:423906:A:G	EyeGEx	EyeGEx	ENSG00000221990	A	3.15943e-05	0.29974	0.0199675	A	+	5	423906	C5orf55	1
5:423906:A:G	EyeGEx	EyeGEx	ENSG00000225138	A	7.8126e-06	0.32144	0.00504591	A	+	5	423906	CTD-2228K2.7	1
5:428236:A:C	EyeGEx	EyeGEx	ENSG00000171368	A	1.22908e-07	0.377349	9.44226026531266e-05	A	+	5	428236	TPPP	1
5:428236:A:C	EyeGEx	EyeGEx	ENSG00000180104	A	1.19702e-22	-0.670646	7.97115720729085e-20	A	-	5	428236	EXOC3	1
5:428236:A:C	EyeGEx	EyeGEx	ENSG00000221990	A	2.99881e-05	0.299696	0.0189524	A	+	5	428236	C5orf55	1
5:428236:A:C	EyeGEx	EyeGEx	ENSG00000225138	A	1.01566e-05	0.316546	0.00655983	A	+	5	428236	CTD-2228K2.7	1
5:429124:C:G	EyeGEx	EyeGEx	ENSG00000171368	G	1.24877e-07	0.37709	9.59352633800443e-05	G	+	5	429124	TPPP	1
5:429124:C:G	EyeGEx	EyeGEx	ENSG00000180104	G	1.22824e-22	-0.670384	8.17905643037118e-20	G	-	5	429124	EXOC3	1
5:429124:C:G	EyeGEx	EyeGEx	ENSG00000221990	G	3.18872e-05	0.298665	0.0201526	G	+	5	429124	C5orf55	1
5:429124:C:G	EyeGEx	EyeGEx	ENSG00000225138	G	1.01237e-05	0.316546	0.00653858	G	+	5	429124	CTD-2228K2.7	1
5:429818:C:G	EyeGEx	EyeGEx	ENSG00000171368	G	1.26517e-07	0.376868	9.71951737874314e-05	G	+	5	429818	TPPP	1
5:429818:C:G	EyeGEx	EyeGEx	ENSG00000180104	G	1.2571e-22	-0.670139	8.3712400171136e-20	G	-	5	429818	EXOC3	1
5:429818:C:G	EyeGEx	EyeGEx	ENSG00000221990	G	3.34218e-05	0.297864	0.0211225	G	+	5	429818	C5orf55	1
5:429818:C:G	EyeGEx	EyeGEx	ENSG00000225138	G	1.01062e-05	0.316524	0.00652728	G	+	5	429818	CTD-2228K2.7	1
5:430059:A:G	EyeGEx	EyeGEx	ENSG00000171368	A	1.27187e-07	0.376776	9.77098932831322e-05	A	+	5	430059	TPPP	1
5:430059:A:G	EyeGEx	EyeGEx	ENSG00000180104	A	1.26953e-22	-0.670034	8.45401347460523e-20	A	-	5	430059	EXOC3	1
5:430059:A:G	EyeGEx	EyeGEx	ENSG00000221990	A	3.40385e-05	0.29755	0.0215122	A	+	5	430059	C5orf55	1
5:430059:A:G	EyeGEx	EyeGEx	ENSG00000225138	A	1.01011e-05	0.31651	0.00652398	A	+	5	430059	CTD-2228K2.7	1
5:430217:C:T	EyeGEx	EyeGEx	ENSG00000171368	T	3.26185e-06	0.332818	0.00250588	T	+	5	430217	TPPP	1
5:430217:C:T	EyeGEx	EyeGEx	ENSG00000180104	T	1.56897e-15	-0.555747	1.04480347224968e-12	T	-	5	430217	EXOC3	1
5:430217:C:T	EyeGEx	EyeGEx	ENSG00000225138	T	1.45985e-07	0.374634	9.42871462736668e-05	T	+	5	430217	CTD-2228K2.7	1
5:434722:C:G	EyeGEx	EyeGEx	ENSG00000171368	C	1.71692e-07	0.372139	0.0001319	C	+	5	434722	TPPP	1
5:434722:C:G	EyeGEx	EyeGEx	ENSG00000180104	C	4.24394e-23	-0.675196	2.82611091864045e-20	C	-	5	434722	EXOC3	1
5:434722:C:G	EyeGEx	EyeGEx	ENSG00000221990	C	4.70024e-05	0.291656	0.0297054	C	+	5	434722	C5orf55	1
5:434722:C:G	EyeGEx	EyeGEx	ENSG00000225138	C	1.35649e-05	0.31132	0.00876114	C	+	5	434722	CTD-2228K2.7	1
5:436981:A:G	EyeGEx	EyeGEx	ENSG00000171368	G	2.76357e-05	0.302635	0.0212308	G	+	5	436981	TPPP	1
5:436981:A:G	EyeGEx	EyeGEx	ENSG00000180104	G	7.25533e-20	-0.632928	4.83144609286173e-17	G	-	5	436981	EXOC3	1
5:436981:A:G	EyeGEx	EyeGEx	ENSG00000206077	G	5.89992e-05	-0.290234	0.0486923	G	-	5	436981	ZDHHC11B	1
5:436981:A:G	EyeGEx	EyeGEx	ENSG00000221990	G	7.24754e-06	0.323363	0.00458043	G	+	5	436981	C5orf55	1
5:436981:A:G	EyeGEx	EyeGEx	ENSG00000225138	G	3.92595e-06	0.33242	0.00253565	G	+	5	436981	CTD-2228K2.7	1
5:437542:C:T	EyeGEx	EyeGEx	ENSG00000171368	C	1.58495e-07	0.372824	0.000121762	C	+	5	437542	TPPP	1
5:437542:C:T	EyeGEx	EyeGEx	ENSG00000180104	C	1.78557e-22	-0.665857	1.18904104982559e-19	C	-	5	437542	EXOC3	1
5:437542:C:T	EyeGEx	EyeGEx	ENSG00000221990	C	6.09399e-05	0.287123	0.0385138	C	+	5	437542	C5orf55	1
5:437542:C:T	EyeGEx	EyeGEx	ENSG00000225138	C	1.06269e-05	0.314758	0.00686358	C	+	5	437542	CTD-2228K2.7	1
5:437586:A:G	EyeGEx	EyeGEx	ENSG00000171368	A	1.58565e-07	0.372821	0.000121816	A	+	5	437586	TPPP	1
5:437586:A:G	EyeGEx	EyeGEx	ENSG00000180104	A	1.78227e-22	-0.665872	1.18684352440546e-19	A	-	5	437586	EXOC3	1
5:437586:A:G	EyeGEx	EyeGEx	ENSG00000221990	A	6.09998e-05	0.287108	0.0385517	A	+	5	437586	C5orf55	1
5:437586:A:G	EyeGEx	EyeGEx	ENSG00000225138	A	1.06322e-05	0.314753	0.00686701	A	+	5	437586	CTD-2228K2.7	1
5:437667:A:G	EyeGEx	EyeGEx	ENSG00000171368	A	1.5867e-07	0.372816	0.000121896	A	+	5	437667	TPPP	1
5:437667:A:G	EyeGEx	EyeGEx	ENSG00000180104	A	1.77736e-22	-0.665896	1.18357387294702e-19	A	-	5	437667	EXOC3	1
5:437667:A:G	EyeGEx	EyeGEx	ENSG00000221990	A	6.10899e-05	0.287087	0.0386086	A	+	5	437667	C5orf55	1
5:437667:A:G	EyeGEx	EyeGEx	ENSG00000225138	A	1.06401e-05	0.314744	0.00687211	A	+	5	437667	CTD-2228K2.7	1
5:437862:C:G	EyeGEx	EyeGEx	ENSG00000171368	C	1.5888e-07	0.372807	0.000122058	C	+	5	437862	TPPP	1
5:437862:C:G	EyeGEx	EyeGEx	ENSG00000180104	C	1.76758e-22	-0.665943	1.17706120670191e-19	C	-	5	437862	EXOC3	1
5:437862:C:G	EyeGEx	EyeGEx	ENSG00000221990	C	6.12705e-05	0.287043	0.0387228	C	+	5	437862	C5orf55	1
5:437862:C:G	EyeGEx	EyeGEx	ENSG00000225138	C	1.06561e-05	0.314728	0.00688244	C	+	5	437862	CTD-2228K2.7	1
2:68385097:A:G	eQTLcatalogue	Alasoo_2018_ge_macrophage_IFNg_Salmonella	ENSG00000221823	A	7.21383e-07	-0.134132	0.00360692	G	+	2	68385097	PPP3R1	1
2:68393144:A:T	eQTLcatalogue	Alasoo_2018_ge_macrophage_IFNg_Salmonella	ENSG00000221823	T	5.59537e-07	-0.136186	0.00279768	A	+	2	68393144	PPP3R1	1
2:68394184:C:T	eQTLcatalogue	Alasoo_2018_ge_macrophage_IFNg_Salmonella	ENSG00000221823	C	5.76228e-07	-0.135959	0.00288114	T	+	2	68394184	PPP3R1	1
2:68395631:A:G	eQTLcatalogue	Alasoo_2018_ge_macrophage_IFNg_Salmonella	ENSG00000221823	G	5.39356e-07	-0.136487	0.00269678	A	+	2	68395631	PPP3R1	1
2:68398919:C:G	eQTLcatalogue	Alasoo_2018_ge_macrophage_IFNg_Salmonella	ENSG00000221823	G	5.11724e-07	-0.136946	0.00255862	C	+	2	68398919	PPP3R1	1
2:68399190:C:T	eQTLcatalogue	Alasoo_2018_ge_macrophage_IFNg_Salmonella	ENSG00000221823	C	5.02107e-07	-0.136995	0.00251053	T	+	2	68399190	PPP3R1	1
2:68402012:G:T	eQTLcatalogue	Alasoo_2018_ge_macrophage_IFNg_Salmonella	ENSG00000221823	G	4.89257e-07	-0.13723	0.00244628	T	+	2	68402012	PPP3R1	1
2:68402830:C:G	eQTLcatalogue	Alasoo_2018_ge_macrophage_IFNg_Salmonella	ENSG00000221823	G	4.8383e-07	-0.137251	0.00241915	C	+	2	68402830	PPP3R1	1
2:68410372:A:C	eQTLcatalogue	Alasoo_2018_ge_macrophage_IFNg_Salmonella	ENSG00000221823	C	4.55483e-07	-0.137572	0.00227742	A	+	2	68410372	PPP3R1	1
2:68410660:G:T	eQTLcatalogue	Alasoo_2018_ge_macrophage_IFNg_Salmonella	ENSG00000221823	T	4.55165e-07	-0.137574	0.00227582	G	+	2	68410660	PPP3R1	1
2:68411414:A:G	eQTLcatalogue	Alasoo_2018_ge_macrophage_IFNg_Salmonella	ENSG00000221823	G	4.54098e-07	-0.137577	0.00227049	A	+	2	68411414	PPP3R1	1
2:68418868:A:T	eQTLcatalogue	Alasoo_2018_ge_macrophage_IFNg_Salmonella	ENSG00000221823	A	4.4048e-07	-0.137449	0.0022024	T	+	2	68418868	PPP3R1	1
2:68419487:A:G	eQTLcatalogue	Alasoo_2018_ge_macrophage_IFNg_Salmonella	ENSG00000221823	G	4.40355e-07	-0.137406	0.00220177	A	+	2	68419487	PPP3R1	1
2:68420070:G:T	eQTLcatalogue	Alasoo_2018_ge_macrophage_IFNg_Salmonella	ENSG00000221823	G	4.3998e-07	-0.137367	0.0021999	T	+	2	68420070	PPP3R1	1
2:68421049:A:G	eQTLcatalogue	Alasoo_2018_ge_macrophage_IFNg_Salmonella	ENSG00000221823	G	4.40558e-07	-0.137298	0.00220279	A	+	2	68421049	PPP3R1	1
2:68422771:A:G	eQTLcatalogue	Alasoo_2018_ge_macrophage_IFNg_Salmonella	ENSG00000221823	G	4.43435e-07	-0.137197	0.00221718	A	+	2	68422771	PPP3R1	1
2:68423530:A:G	eQTLcatalogue	Alasoo_2018_ge_macrophage_IFNg_Salmonella	ENSG00000221823	G	4.42505e-07	-0.137109	0.00221253	A	+	2	68423530	PPP3R1	1
2:68430925:C:T	eQTLcatalogue	Alasoo_2018_ge_macrophage_IFNg_Salmonella	ENSG00000221823	C	4.61001e-07	-0.136099	0.002305	T	+	2	68430925	PPP3R1	1
2:68431259:A:G	eQTLcatalogue	Alasoo_2018_ge_macrophage_IFNg_Salmonella	ENSG00000221823	G	4.60003e-07	-0.136055	0.00230002	A	+	2	68431259	PPP3R1	1
2:68433831:A:G	eQTLcatalogue	Alasoo_2018_ge_macrophage_IFNg_Salmonella	ENSG00000221823	G	4.73656e-07	-0.135559	0.00236828	A	+	2	68433831	PPP3R1	1
2:68435431:C:G	eQTLcatalogue	Alasoo_2018_ge_macrophage_IFNg_Salmonella	ENSG00000221823	C	4.8172e-07	-0.135988	0.0024086	G	+	2	68435431	PPP3R1	1
2:68438614:C:T	eQTLcatalogue	Alasoo_2018_ge_macrophage_IFNg_Salmonella	ENSG00000221823	C	4.90627e-07	-0.136522	0.00245313	T	+	2	68438614	PPP3R1	1
2:68439960:C:T	eQTLcatalogue	Alasoo_2018_ge_macrophage_IFNg_Salmonella	ENSG00000221823	C	5.76928e-07	-0.13639	0.00288464	T	+	2	68439960	PPP3R1	1
2:68443651:A:G	eQTLcatalogue	Alasoo_2018_ge_macrophage_IFNg_Salmonella	ENSG00000221823	A	5.8832e-07	-0.136996	0.0029416	G	+	2	68443651	PPP3R1	1
2:68443835:A:T	eQTLcatalogue	Alasoo_2018_ge_macrophage_IFNg_Salmonella	ENSG00000221823	A	5.94634e-07	-0.136925	0.00297317	T	+	2	68443835	PPP3R1	1
2:68446936:C:T	eQTLcatalogue	Alasoo_2018_ge_macrophage_IFNg_Salmonella	ENSG00000221823	C	5.18801e-07	-0.137635	0.002594	T	+	2	68446936	PPP3R1	1
2:68457573:C:T	eQTLcatalogue	Alasoo_2018_ge_macrophage_IFNg_Salmonella	ENSG00000221823	C	5.95109e-07	-0.138893	0.00297554	T	+	2	68457573	PPP3R1	1
2:68457854:A:G	eQTLcatalogue	Alasoo_2018_ge_macrophage_IFNg_Salmonella	ENSG00000221823	A	5.9718e-07	-0.138921	0.0029859	G	+	2	68457854	PPP3R1	1
2:68463612:A:G	eQTLcatalogue	Alasoo_2018_ge_macrophage_IFNg_Salmonella	ENSG00000221823	G	6.50134e-07	-0.139471	0.00325067	A	+	2	68463612	PPP3R1	1
2:68467910:A:C	eQTLcatalogue	Alasoo_2018_ge_macrophage_IFNg_Salmonella	ENSG00000221823	A	6.84291e-07	-0.139576	0.00342146	C	+	2	68467910	PPP3R1	1
2:68475595:A:C	eQTLcatalogue	Alasoo_2018_ge_macrophage_IFNg_Salmonella	ENSG00000221823	C	7.73834e-07	-0.139816	0.00386917	A	+	2	68475595	PPP3R1	1
2:68477248:C:T	eQTLcatalogue	Alasoo_2018_ge_macrophage_IFNg_Salmonella	ENSG00000221823	T	7.73847e-07	-0.140177	0.00386923	C	+	2	68477248	PPP3R1	1
2:68478919:A:G	eQTLcatalogue	Alasoo_2018_ge_macrophage_IFNg_Salmonella	ENSG00000221823	A	9.29636e-07	-0.140324	0.00464818	G	+	2	68478919	PPP3R1	1
2:68385097:A:G	eQTLcatalogue	Alasoo_2018_ge_macrophage_Salmonella	ENSG00000221823	A	4.00954e-06	-0.103539	0.0200477	G	+	2	68385097	PPP3R1	1
2:68393144:A:T	eQTLcatalogue	Alasoo_2018_ge_macrophage_Salmonella	ENSG00000221823	T	5.72896e-06	-0.102756	0.0286448	A	+	2	68393144	PPP3R1	1
2:68394184:C:T	eQTLcatalogue	Alasoo_2018_ge_macrophage_Salmonella	ENSG00000221823	C	6.60551e-06	-0.102084	0.0330276	T	+	2	68394184	PPP3R1	1
2:68395631:A:G	eQTLcatalogue	Alasoo_2018_ge_macrophage_Salmonella	ENSG00000221823	G	6.25075e-06	-0.102492	0.0312538	A	+	2	68395631	PPP3R1	1
2:68398919:C:G	eQTLcatalogue	Alasoo_2018_ge_macrophage_Salmonella	ENSG00000221823	G	6.86067e-06	-0.102265	0.0343033	C	+	2	68398919	PPP3R1	1
2:68399190:C:T	eQTLcatalogue	Alasoo_2018_ge_macrophage_Salmonella	ENSG00000221823	C	6.88552e-06	-0.102223	0.0344276	T	+	2	68399190	PPP3R1	1
2:68402012:G:T	eQTLcatalogue	Alasoo_2018_ge_macrophage_Salmonella	ENSG00000221823	G	7.59873e-06	-0.10189	0.0379937	T	+	2	68402012	PPP3R1	1
2:68402830:C:G	eQTLcatalogue	Alasoo_2018_ge_macrophage_Salmonella	ENSG00000221823	G	7.83504e-06	-0.101738	0.0391752	C	+	2	68402830	PPP3R1	1
5:416118:A:G	eQTLcatalogue	BLUEPRINT_ge_monocyte	ENSG00000180104	G	6.15666e-17	-0.160092	3.07833e-13	A	+	5	416118	EXOC3	1
5:416672:A:G	eQTLcatalogue	BLUEPRINT_ge_monocyte	ENSG00000180104	G	6.11295e-17	-0.160082	3.05647e-13	A	+	5	416672	EXOC3	1
5:418093:A:G	eQTLcatalogue	BLUEPRINT_ge_monocyte	ENSG00000225138	A	4.05561e-11	-0.820289	2.0278e-07	G	+	5	418093	CTD-2228K2.7	1
5:418494:A:G	eQTLcatalogue	BLUEPRINT_ge_monocyte	ENSG00000180104	A	4.27659e-17	-0.161154	2.13829e-13	G	+	5	418494	EXOC3	1
5:421403:A:G	eQTLcatalogue	BLUEPRINT_ge_monocyte	ENSG00000180104	G	4.20095e-17	-0.161271	2.10047e-13	A	+	5	421403	EXOC3	1
5:421426:A:C	eQTLcatalogue	BLUEPRINT_ge_monocyte	ENSG00000225138	A	2.41193e-10	-0.771432	1.20597e-06	C	+	5	421426	CTD-2228K2.7	1
5:421455:G:T	eQTLcatalogue	BLUEPRINT_ge_monocyte	ENSG00000180104	G	4.29645e-17	-0.161144	2.14823e-13	T	+	5	421455	EXOC3	1
5:422178:A:G	eQTLcatalogue	BLUEPRINT_ge_monocyte	ENSG00000180104	G	1.70803e-25	-0.185309	8.54015e-22	A	+	5	422178	EXOC3	1
5:423169:C:T	eQTLcatalogue	BLUEPRINT_ge_monocyte	ENSG00000180104	C	1.86481e-25	-0.184731	9.32405e-22	T	+	5	423169	EXOC3	1
5:423595:C:T	eQTLcatalogue	BLUEPRINT_ge_monocyte	ENSG00000180104	C	1.97679e-25	-0.184675	9.88395e-22	T	+	5	423595	EXOC3	1
5:423906:A:G	eQTLcatalogue	BLUEPRINT_ge_monocyte	ENSG00000180104	G	1.90677e-25	-0.184751	9.53385e-22	A	+	5	423906	EXOC3	1
5:428236:A:C	eQTLcatalogue	BLUEPRINT_ge_monocyte	ENSG00000180104	C	9.84266e-26	-0.184036	4.92133e-22	A	+	5	428236	EXOC3	1
5:429124:C:G	eQTLcatalogue	BLUEPRINT_ge_monocyte	ENSG00000180104	C	9.82695e-26	-0.184027	4.91348e-22	G	+	5	429124	EXOC3	1
5:429818:C:G	eQTLcatalogue	BLUEPRINT_ge_monocyte	ENSG00000180104	C	1.03193e-25	-0.184057	5.15965e-22	G	+	5	429818	EXOC3	1
5:430059:A:G	eQTLcatalogue	BLUEPRINT_ge_monocyte	ENSG00000180104	G	8.93668e-26	-0.184448	4.46834e-22	A	+	5	430059	EXOC3	1
5:434722:C:G	eQTLcatalogue	BLUEPRINT_ge_monocyte	ENSG00000180104	G	6.12948e-26	-0.185316	3.06474e-22	C	+	5	434722	EXOC3	1
5:436981:A:G	eQTLcatalogue	BLUEPRINT_ge_monocyte	ENSG00000180104	A	5.25272e-19	-0.154821	2.62636e-15	G	+	5	436981	EXOC3	1
5:437542:C:T	eQTLcatalogue	BLUEPRINT_ge_monocyte	ENSG00000180104	T	1.00773e-25	-0.184001	5.03865e-22	C	+	5	437542	EXOC3	1
5:437586:A:G	eQTLcatalogue	BLUEPRINT_ge_monocyte	ENSG00000180104	G	1.00827e-25	-0.183999	5.04135e-22	A	+	5	437586	EXOC3	1
5:437667:A:G	eQTLcatalogue	BLUEPRINT_ge_monocyte	ENSG00000180104	G	9.94457e-26	-0.184012	4.97228e-22	A	+	5	437667	EXOC3	1
5:437862:C:G	eQTLcatalogue	BLUEPRINT_ge_monocyte	ENSG00000180104	G	1.00514e-25	-0.184031	5.0257e-22	C	+	5	437862	EXOC3	1
2:68385097:A:G	eQTLcatalogue	BLUEPRINT_ge_neutrophil	ENSG00000273064	A	3.08524e-16	0.332325	1.54262e-12	G	-	2	68385097	RP11-474G23.3	1
2:68393144:A:T	eQTLcatalogue	BLUEPRINT_ge_neutrophil	ENSG00000273064	T	5.67688e-18	0.348975	2.83844e-14	A	-	2	68393144	RP11-474G23.3	1
2:68394184:C:T	eQTLcatalogue	BLUEPRINT_ge_neutrophil	ENSG00000273064	C	5.64008e-18	0.348982	2.82004e-14	T	-	2	68394184	RP11-474G23.3	1
2:68395631:A:G	eQTLcatalogue	BLUEPRINT_ge_neutrophil	ENSG00000273064	G	5.63097e-18	0.348989	2.81548e-14	A	-	2	68395631	RP11-474G23.3	1
2:68398919:C:G	eQTLcatalogue	BLUEPRINT_ge_neutrophil	ENSG00000273064	G	5.61748e-18	0.349057	2.80874e-14	C	-	2	68398919	RP11-474G23.3	1
2:68399190:C:T	eQTLcatalogue	BLUEPRINT_ge_neutrophil	ENSG00000273064	C	5.64008e-18	0.348982	2.82004e-14	T	-	2	68399190	RP11-474G23.3	1
2:68402012:G:T	eQTLcatalogue	BLUEPRINT_ge_neutrophil	ENSG00000273064	G	5.65009e-18	0.348984	2.82505e-14	T	-	2	68402012	RP11-474G23.3	1
2:68410372:A:C	eQTLcatalogue	BLUEPRINT_ge_neutrophil	ENSG00000273064	C	5.64318e-18	0.348981	2.82159e-14	A	-	2	68410372	RP11-474G23.3	1
2:68410660:G:T	eQTLcatalogue	BLUEPRINT_ge_neutrophil	ENSG00000273064	T	5.6402e-18	0.348987	2.8201e-14	G	-	2	68410660	RP11-474G23.3	1
2:68411414:A:G	eQTLcatalogue	BLUEPRINT_ge_neutrophil	ENSG00000273064	G	5.64008e-18	0.348982	2.82004e-14	A	-	2	68411414	RP11-474G23.3	1
2:68418868:A:T	eQTLcatalogue	BLUEPRINT_ge_neutrophil	ENSG00000273064	A	5.64008e-18	0.348982	2.82004e-14	T	-	2	68418868	RP11-474G23.3	1
2:68419487:A:G	eQTLcatalogue	BLUEPRINT_ge_neutrophil	ENSG00000273064	G	5.64008e-18	0.348982	2.82004e-14	A	-	2	68419487	RP11-474G23.3	1
2:68420070:G:T	eQTLcatalogue	BLUEPRINT_ge_neutrophil	ENSG00000273064	G	5.64008e-18	0.348982	2.82004e-14	T	-	2	68420070	RP11-474G23.3	1
2:68421049:A:G	eQTLcatalogue	BLUEPRINT_ge_neutrophil	ENSG00000273064	G	5.64389e-18	0.348978	2.82195e-14	A	-	2	68421049	RP11-474G23.3	1
2:68422771:A:G	eQTLcatalogue	BLUEPRINT_ge_neutrophil	ENSG00000273064	G	5.64647e-18	0.348975	2.82324e-14	A	-	2	68422771	RP11-474G23.3	1
2:68423530:A:G	eQTLcatalogue	BLUEPRINT_ge_neutrophil	ENSG00000273064	G	3.17795e-18	0.350667	1.58897e-14	A	-	2	68423530	RP11-474G23.3	1
2:68430925:C:T	eQTLcatalogue	BLUEPRINT_ge_neutrophil	ENSG00000273064	C	2.14812e-18	0.355866	1.07406e-14	T	-	2	68430925	RP11-474G23.3	1
2:68433831:A:G	eQTLcatalogue	BLUEPRINT_ge_neutrophil	ENSG00000273064	G	5.2721e-18	0.349481	2.63605e-14	A	-	2	68433831	RP11-474G23.3	1
2:68435431:C:G	eQTLcatalogue	BLUEPRINT_ge_neutrophil	ENSG00000273064	C	5.64008e-18	0.348982	2.82004e-14	G	-	2	68435431	RP11-474G23.3	1
2:68438614:C:T	eQTLcatalogue	BLUEPRINT_ge_neutrophil	ENSG00000273064	C	2.14981e-18	0.355861	1.07491e-14	T	-	2	68438614	RP11-474G23.3	1
2:68439960:C:T	eQTLcatalogue	BLUEPRINT_ge_neutrophil	ENSG00000273064	C	2.14981e-18	0.355861	1.07491e-14	T	-	2	68439960	RP11-474G23.3	1
2:68443651:A:G	eQTLcatalogue	BLUEPRINT_ge_neutrophil	ENSG00000273064	A	2.30554e-18	0.355609	1.15277e-14	G	-	2	68443651	RP11-474G23.3	1
2:68446936:C:T	eQTLcatalogue	BLUEPRINT_ge_neutrophil	ENSG00000273064	C	2.14981e-18	0.355861	1.07491e-14	T	-	2	68446936	RP11-474G23.3	1
2:68457573:C:T	eQTLcatalogue	BLUEPRINT_ge_neutrophil	ENSG00000273064	C	6.18404e-19	0.35863	3.09202e-15	T	-	2	68457573	RP11-474G23.3	1
2:68457854:A:G	eQTLcatalogue	BLUEPRINT_ge_neutrophil	ENSG00000273064	A	6.18404e-19	0.35863	3.09202e-15	G	-	2	68457854	RP11-474G23.3	1
2:68463612:A:G	eQTLcatalogue	BLUEPRINT_ge_neutrophil	ENSG00000273064	G	6.18404e-19	0.35863	3.09202e-15	A	-	2	68463612	RP11-474G23.3	1
2:68467910:A:C	eQTLcatalogue	BLUEPRINT_ge_neutrophil	ENSG00000273064	A	6.19121e-19	0.358652	3.0956e-15	C	-	2	68467910	RP11-474G23.3	1
2:68475595:A:C	eQTLcatalogue	BLUEPRINT_ge_neutrophil	ENSG00000273064	C	6.18404e-19	0.35863	3.09202e-15	A	-	2	68475595	RP11-474G23.3	1
2:68477248:C:T	eQTLcatalogue	BLUEPRINT_ge_neutrophil	ENSG00000273064	T	9.51832e-19	0.357083	4.75916e-15	C	-	2	68477248	RP11-474G23.3	1
5:416118:A:G	eQTLcatalogue	BLUEPRINT_ge_neutrophil	ENSG00000180104	G	2.53212e-38	-0.280352	1.26606e-34	A	+	5	416118	EXOC3	1
5:416672:A:G	eQTLcatalogue	BLUEPRINT_ge_neutrophil	ENSG00000180104	G	2.5555e-38	-0.280303	1.27775e-34	A	+	5	416672	EXOC3	1
5:418093:A:G	eQTLcatalogue	BLUEPRINT_ge_neutrophil	ENSG00000180104	A	1.23199e-11	-0.217961	6.15995e-08	G	+	5	418093	EXOC3	1
5:418494:A:G	eQTLcatalogue	BLUEPRINT_ge_neutrophil	ENSG00000180104	A	1.87484e-38	-0.281303	9.3742e-35	G	+	5	418494	EXOC3	1
5:421403:A:G	eQTLcatalogue	BLUEPRINT_ge_neutrophil	ENSG00000180104	G	1.97786e-38	-0.281396	9.8893e-35	A	+	5	421403	EXOC3	1
5:421426:A:C	eQTLcatalogue	BLUEPRINT_ge_neutrophil	ENSG00000180104	A	2.71549e-12	-0.21885	1.35775e-08	C	+	5	421426	EXOC3	1
5:421455:G:T	eQTLcatalogue	BLUEPRINT_ge_neutrophil	ENSG00000180104	G	1.85956e-38	-0.281309	9.2978e-35	T	+	5	421455	EXOC3	1
5:422178:A:G	eQTLcatalogue	BLUEPRINT_ge_neutrophil	ENSG00000180104	G	3.94906e-55	-0.303521	1.97453e-51	A	+	5	422178	EXOC3	1
5:423169:C:T	eQTLcatalogue	BLUEPRINT_ge_neutrophil	ENSG00000180104	C	3.46713e-55	-0.302862	1.73356e-51	T	+	5	423169	EXOC3	1
5:423595:C:T	eQTLcatalogue	BLUEPRINT_ge_neutrophil	ENSG00000180104	C	3.29901e-55	-0.302915	1.6495e-51	T	+	5	423595	EXOC3	1
5:423906:A:G	eQTLcatalogue	BLUEPRINT_ge_neutrophil	ENSG00000180104	G	3.2525e-55	-0.302978	1.62625e-51	A	+	5	423906	EXOC3	1
5:428236:A:C	eQTLcatalogue	BLUEPRINT_ge_neutrophil	ENSG00000180104	C	3.34665e-56	-0.301914	1.67332e-52	A	+	5	428236	EXOC3	1
5:429124:C:G	eQTLcatalogue	BLUEPRINT_ge_neutrophil	ENSG00000180104	C	3.20908e-56	-0.301922	1.60454e-52	G	+	5	429124	EXOC3	1
5:429818:C:G	eQTLcatalogue	BLUEPRINT_ge_neutrophil	ENSG00000180104	C	3.35838e-56	-0.302035	1.67919e-52	G	+	5	429818	EXOC3	1
5:430059:A:G	eQTLcatalogue	BLUEPRINT_ge_neutrophil	ENSG00000180104	G	3.92458e-56	-0.302287	1.96229e-52	A	+	5	430059	EXOC3	1
5:434722:C:G	eQTLcatalogue	BLUEPRINT_ge_neutrophil	ENSG00000180104	G	1.63296e-55	-0.302052	8.1648e-52	C	+	5	434722	EXOC3	1
5:436981:A:G	eQTLcatalogue	BLUEPRINT_ge_neutrophil	ENSG00000180104	A	3.40474e-37	-0.257414	1.70237e-33	G	+	5	436981	EXOC3	1
5:437542:C:T	eQTLcatalogue	BLUEPRINT_ge_neutrophil	ENSG00000180104	T	3.40585e-56	-0.301894	1.70292e-52	C	+	5	437542	EXOC3	1
5:437586:A:G	eQTLcatalogue	BLUEPRINT_ge_neutrophil	ENSG00000180104	G	3.42011e-56	-0.30189	1.71005e-52	A	+	5	437586	EXOC3	1
5:437667:A:G	eQTLcatalogue	BLUEPRINT_ge_neutrophil	ENSG00000180104	G	3.41747e-56	-0.301884	1.70874e-52	A	+	5	437667	EXOC3	1
5:437862:C:G	eQTLcatalogue	BLUEPRINT_ge_neutrophil	ENSG00000180104	G	3.41135e-56	-0.301936	1.70568e-52	C	+	5	437862	EXOC3	1
2:68385097:A:G	eQTLcatalogue	BLUEPRINT_ge_T-cell	ENSG00000115946	A	5.8123e-06	-0.0542935	0.0290615	G	+	2	68385097	PNO1	1
5:416118:A:G	eQTLcatalogue	BLUEPRINT_ge_T-cell	ENSG00000225138	G	2.15775e-09	0.512255	1.07887e-05	A	-	5	416118	CTD-2228K2.7	1
5:416672:A:G	eQTLcatalogue	BLUEPRINT_ge_T-cell	ENSG00000225138	G	2.18907e-09	0.511987	1.09454e-05	A	-	5	416672	CTD-2228K2.7	1
5:418494:A:G	eQTLcatalogue	BLUEPRINT_ge_T-cell	ENSG00000225138	A	8.41994e-10	0.52518	4.20997e-06	G	-	5	418494	CTD-2228K2.7	1
5:421403:A:G	eQTLcatalogue	BLUEPRINT_ge_T-cell	ENSG00000225138	G	8.48742e-10	0.525335	4.24371e-06	A	-	5	421403	CTD-2228K2.7	1
5:421455:G:T	eQTLcatalogue	BLUEPRINT_ge_T-cell	ENSG00000225138	G	8.35725e-10	0.525268	4.17863e-06	T	-	5	421455	CTD-2228K2.7	1
5:422178:A:G	eQTLcatalogue	BLUEPRINT_ge_T-cell	ENSG00000225138	G	2.06347e-07	0.438283	0.00103173	A	-	5	422178	CTD-2228K2.7	1
5:423169:C:T	eQTLcatalogue	BLUEPRINT_ge_T-cell	ENSG00000225138	C	2.49173e-07	0.434246	0.00124587	T	-	5	423169	CTD-2228K2.7	1
5:423595:C:T	eQTLcatalogue	BLUEPRINT_ge_T-cell	ENSG00000225138	C	2.58485e-07	0.433756	0.00129243	T	-	5	423595	CTD-2228K2.7	1
5:423906:A:G	eQTLcatalogue	BLUEPRINT_ge_T-cell	ENSG00000225138	G	2.51455e-07	0.434257	0.00125727	A	-	5	423906	CTD-2228K2.7	1
5:428236:A:C	eQTLcatalogue	BLUEPRINT_ge_T-cell	ENSG00000225138	C	1.34357e-07	0.438702	0.000671785	A	-	5	428236	CTD-2228K2.7	1
5:429124:C:G	eQTLcatalogue	BLUEPRINT_ge_T-cell	ENSG00000225138	C	1.33064e-07	0.438849	0.00066532	G	-	5	429124	CTD-2228K2.7	1
5:429818:C:G	eQTLcatalogue	BLUEPRINT_ge_T-cell	ENSG00000225138	C	1.34654e-07	0.438929	0.00067327	G	-	5	429818	CTD-2228K2.7	1
5:430059:A:G	eQTLcatalogue	BLUEPRINT_ge_T-cell	ENSG00000225138	G	1.33816e-07	0.438921	0.00066908	A	-	5	430059	CTD-2228K2.7	1
5:434722:C:G	eQTLcatalogue	BLUEPRINT_ge_T-cell	ENSG00000225138	G	1.33139e-07	0.438878	0.000665695	C	-	5	434722	CTD-2228K2.7	1
5:437542:C:T	eQTLcatalogue	BLUEPRINT_ge_T-cell	ENSG00000225138	T	1.3348e-07	0.438819	0.0006674	C	-	5	437542	CTD-2228K2.7	1
5:437586:A:G	eQTLcatalogue	BLUEPRINT_ge_T-cell	ENSG00000225138	G	1.3348e-07	0.438819	0.0006674	A	-	5	437586	CTD-2228K2.7	1
5:437667:A:G	eQTLcatalogue	BLUEPRINT_ge_T-cell	ENSG00000225138	G	1.33614e-07	0.438792	0.00066807	A	-	5	437667	CTD-2228K2.7	1
5:437862:C:G	eQTLcatalogue	BLUEPRINT_ge_T-cell	ENSG00000225138	G	1.31924e-07	0.439064	0.00065962	C	-	5	437862	CTD-2228K2.7	1
5:418093:A:G	eQTLcatalogue	BrainSeq_ge_brain	ENSG00000066230	A	9.56896e-14	-0.389037	4.78448e-10	G	+	5	418093	SLC9A3	1
5:418093:A:G	eQTLcatalogue	BrainSeq_ge_brain	ENSG00000225138	A	4.31908e-10	-0.316351	2.15954e-06	G	+	5	418093	CTD-2228K2.7	1
5:421426:A:C	eQTLcatalogue	BrainSeq_ge_brain	ENSG00000066230	A	3.18874e-14	-0.402485	1.59437e-10	C	+	5	421426	SLC9A3	1
5:421426:A:C	eQTLcatalogue	BrainSeq_ge_brain	ENSG00000225138	A	2.52314e-10	-0.325569	1.26157e-06	C	+	5	421426	CTD-2228K2.7	1
5:430217:C:T	eQTLcatalogue	BrainSeq_ge_brain	ENSG00000180104	C	9.62278e-08	-0.0477503	0.000481139	T	+	5	430217	EXOC3	1
2:68385097:A:G	eQTLcatalogue	CEDAR_B-cell_CD19	ENSG00000243667	A	1.22768e-10	-0.0955472	6.1384e-07	G	+	2	68385097	WDR92	1
2:68385097:A:G	eQTLcatalogue	CEDAR_B-cell_CD19	ENSG00000221823	A	7.72105e-06	0.167822	0.0386053	G	-	2	68385097	PPP3R1	1
2:68393144:A:T	eQTLcatalogue	CEDAR_B-cell_CD19	ENSG00000243667	T	7.75184e-10	-0.0908262	3.87592e-06	A	+	2	68393144	WDR92	1
2:68394184:C:T	eQTLcatalogue	CEDAR_B-cell_CD19	ENSG00000243667	C	7.99974e-10	-0.0907487	3.99987e-06	T	+	2	68394184	WDR92	1
2:68395631:A:G	eQTLcatalogue	CEDAR_B-cell_CD19	ENSG00000243667	G	8.36226e-10	-0.0906237	4.18113e-06	A	+	2	68395631	WDR92	1
2:68398919:C:G	eQTLcatalogue	CEDAR_B-cell_CD19	ENSG00000243667	G	1.36658e-09	-0.0896771	6.8329e-06	C	+	2	68398919	WDR92	1
2:68398919:C:G	eQTLcatalogue	CEDAR_B-cell_CD19	ENSG00000221823	G	6.95473e-06	0.167359	0.0347737	C	-	2	68398919	PPP3R1	1
2:68399190:C:T	eQTLcatalogue	CEDAR_B-cell_CD19	ENSG00000243667	C	1.42983e-09	-0.089527	7.14915e-06	T	+	2	68399190	WDR92	1
2:68399190:C:T	eQTLcatalogue	CEDAR_B-cell_CD19	ENSG00000221823	C	6.93808e-06	0.167285	0.0346904	T	-	2	68399190	PPP3R1	1
2:68402012:G:T	eQTLcatalogue	CEDAR_B-cell_CD19	ENSG00000243667	G	1.56938e-09	-0.0892311	7.8469e-06	T	+	2	68402012	WDR92	1
2:68402012:G:T	eQTLcatalogue	CEDAR_B-cell_CD19	ENSG00000221823	G	7.4775e-06	0.166548	0.0373875	T	-	2	68402012	PPP3R1	1
2:68402830:C:G	eQTLcatalogue	CEDAR_B-cell_CD19	ENSG00000243667	G	1.57069e-09	-0.0892322	7.85345e-06	C	+	2	68402830	WDR92	1
2:68402830:C:G	eQTLcatalogue	CEDAR_B-cell_CD19	ENSG00000221823	G	7.47248e-06	0.166558	0.0373624	C	-	2	68402830	PPP3R1	1
2:68410372:A:C	eQTLcatalogue	CEDAR_B-cell_CD19	ENSG00000243667	C	2.15312e-09	-0.0888639	1.07656e-05	A	+	2	68410372	WDR92	1
2:68410372:A:C	eQTLcatalogue	CEDAR_B-cell_CD19	ENSG00000221823	C	9.88736e-06	0.16503	0.0494368	A	-	2	68410372	PPP3R1	1
2:68410660:G:T	eQTLcatalogue	CEDAR_B-cell_CD19	ENSG00000243667	T	2.14917e-09	-0.088871	1.07458e-05	G	+	2	68410660	WDR92	1
2:68410660:G:T	eQTLcatalogue	CEDAR_B-cell_CD19	ENSG00000221823	T	9.87174e-06	0.165048	0.0493587	G	-	2	68410660	PPP3R1	1
2:68411414:A:G	eQTLcatalogue	CEDAR_B-cell_CD19	ENSG00000243667	G	2.15345e-09	-0.0888709	1.07672e-05	A	+	2	68411414	WDR92	1
2:68411414:A:G	eQTLcatalogue	CEDAR_B-cell_CD19	ENSG00000221823	G	9.86794e-06	0.165059	0.0493397	A	-	2	68411414	PPP3R1	1
2:68418868:A:T	eQTLcatalogue	CEDAR_B-cell_CD19	ENSG00000243667	A	2.14829e-09	-0.0889489	1.07414e-05	T	+	2	68418868	WDR92	1
2:68418868:A:T	eQTLcatalogue	CEDAR_B-cell_CD19	ENSG00000221823	A	9.75019e-06	0.165287	0.048751	T	-	2	68418868	PPP3R1	1
2:68419487:A:G	eQTLcatalogue	CEDAR_B-cell_CD19	ENSG00000243667	G	2.14556e-09	-0.0889527	1.07278e-05	A	+	2	68419487	WDR92	1
2:68419487:A:G	eQTLcatalogue	CEDAR_B-cell_CD19	ENSG00000221823	G	9.7477e-06	0.165291	0.0487385	A	-	2	68419487	PPP3R1	1
2:68420070:G:T	eQTLcatalogue	CEDAR_B-cell_CD19	ENSG00000243667	G	2.148e-09	-0.0889503	1.074e-05	T	+	2	68420070	WDR92	1
2:68420070:G:T	eQTLcatalogue	CEDAR_B-cell_CD19	ENSG00000221823	G	9.75291e-06	0.165287	0.0487646	T	-	2	68420070	PPP3R1	1
2:68421049:A:G	eQTLcatalogue	CEDAR_B-cell_CD19	ENSG00000243667	G	2.1487e-09	-0.0889483	1.07435e-05	A	+	2	68421049	WDR92	1
2:68421049:A:G	eQTLcatalogue	CEDAR_B-cell_CD19	ENSG00000221823	G	9.75028e-06	0.165287	0.0487514	A	-	2	68421049	PPP3R1	1
2:68422771:A:G	eQTLcatalogue	CEDAR_B-cell_CD19	ENSG00000243667	G	2.15082e-09	-0.0889435	1.07541e-05	A	+	2	68422771	WDR92	1
2:68422771:A:G	eQTLcatalogue	CEDAR_B-cell_CD19	ENSG00000221823	G	9.75006e-06	0.165282	0.0487503	A	-	2	68422771	PPP3R1	1
2:68423530:A:G	eQTLcatalogue	CEDAR_B-cell_CD19	ENSG00000243667	G	2.1558e-09	-0.0889356	1.0779e-05	A	+	2	68423530	WDR92	1
2:68423530:A:G	eQTLcatalogue	CEDAR_B-cell_CD19	ENSG00000221823	G	9.75537e-06	0.165273	0.0487768	A	-	2	68423530	PPP3R1	1
2:68430925:C:T	eQTLcatalogue	CEDAR_B-cell_CD19	ENSG00000243667	C	2.15515e-09	-0.0887855	1.07757e-05	T	+	2	68430925	WDR92	1
2:68430925:C:T	eQTLcatalogue	CEDAR_B-cell_CD19	ENSG00000221823	C	9.87363e-06	0.164899	0.0493681	T	-	2	68430925	PPP3R1	1
2:68431259:A:G	eQTLcatalogue	CEDAR_B-cell_CD19	ENSG00000243667	G	2.15983e-09	-0.0887735	1.07991e-05	A	+	2	68431259	WDR92	1
2:68431259:A:G	eQTLcatalogue	CEDAR_B-cell_CD19	ENSG00000221823	G	9.89609e-06	0.164868	0.0494804	A	-	2	68431259	PPP3R1	1
2:68433831:A:G	eQTLcatalogue	CEDAR_B-cell_CD19	ENSG00000243667	G	2.14882e-09	-0.0887082	1.07441e-05	A	+	2	68433831	WDR92	1
2:68435431:C:G	eQTLcatalogue	CEDAR_B-cell_CD19	ENSG00000243667	C	2.6647e-09	-0.0885818	1.33235e-05	G	+	2	68435431	WDR92	1
2:68438614:C:T	eQTLcatalogue	CEDAR_B-cell_CD19	ENSG00000243667	C	1.98461e-09	-0.0895704	9.92305e-06	T	+	2	68438614	WDR92	1
2:68438614:C:T	eQTLcatalogue	CEDAR_B-cell_CD19	ENSG00000221823	C	9.33485e-06	0.166448	0.0466743	T	-	2	68438614	PPP3R1	1
2:68439960:C:T	eQTLcatalogue	CEDAR_B-cell_CD19	ENSG00000243667	C	1.9951e-09	-0.0895198	9.9755e-06	T	+	2	68439960	WDR92	1
2:68443651:A:G	eQTLcatalogue	CEDAR_B-cell_CD19	ENSG00000243667	A	1.99125e-09	-0.0899203	9.95625e-06	G	+	2	68443651	WDR92	1
2:68443651:A:G	eQTLcatalogue	CEDAR_B-cell_CD19	ENSG00000221823	A	9.75538e-06	0.166767	0.0487769	G	-	2	68443651	PPP3R1	1
2:68443835:A:T	eQTLcatalogue	CEDAR_B-cell_CD19	ENSG00000243667	A	1.92704e-09	-0.0899713	9.6352e-06	T	+	2	68443835	WDR92	1
2:68443835:A:T	eQTLcatalogue	CEDAR_B-cell_CD19	ENSG00000221823	A	9.90214e-06	0.166607	0.0495107	T	-	2	68443835	PPP3R1	1
2:68446936:C:T	eQTLcatalogue	CEDAR_B-cell_CD19	ENSG00000243667	C	2.07326e-09	-0.0902856	1.03663e-05	T	+	2	68446936	WDR92	1
2:68446936:C:T	eQTLcatalogue	CEDAR_B-cell_CD19	ENSG00000221823	C	8.58744e-06	0.168618	0.0429372	T	-	2	68446936	PPP3R1	1
2:68457573:C:T	eQTLcatalogue	CEDAR_B-cell_CD19	ENSG00000243667	C	1.77002e-09	-0.0914069	8.8501e-06	T	+	2	68457573	WDR92	1
2:68457573:C:T	eQTLcatalogue	CEDAR_B-cell_CD19	ENSG00000221823	C	8.39059e-06	0.170216	0.041953	T	-	2	68457573	PPP3R1	1
2:68457854:A:G	eQTLcatalogue	CEDAR_B-cell_CD19	ENSG00000243667	A	1.76835e-09	-0.091423	8.84175e-06	G	+	2	68457854	WDR92	1
2:68457854:A:G	eQTLcatalogue	CEDAR_B-cell_CD19	ENSG00000221823	A	8.39675e-06	0.170236	0.0419837	G	-	2	68457854	PPP3R1	1
2:68463612:A:G	eQTLcatalogue	CEDAR_B-cell_CD19	ENSG00000243667	G	1.95463e-09	-0.0916343	9.77315e-06	A	+	2	68463612	WDR92	1
2:68463612:A:G	eQTLcatalogue	CEDAR_B-cell_CD19	ENSG00000221823	G	7.38684e-06	0.172073	0.0369342	A	-	2	68463612	PPP3R1	1
2:68467910:A:C	eQTLcatalogue	CEDAR_B-cell_CD19	ENSG00000243667	A	1.85581e-09	-0.0916815	9.27905e-06	C	+	2	68467910	WDR92	1
2:68467910:A:C	eQTLcatalogue	CEDAR_B-cell_CD19	ENSG00000221823	A	8.53861e-06	0.170792	0.0426931	C	-	2	68467910	PPP3R1	1
2:68475595:A:C	eQTLcatalogue	CEDAR_B-cell_CD19	ENSG00000243667	C	2.04047e-09	-0.0914976	1.02024e-05	A	+	2	68475595	WDR92	1
2:68475595:A:C	eQTLcatalogue	CEDAR_B-cell_CD19	ENSG00000221823	C	8.91816e-06	0.170512	0.0445908	A	-	2	68475595	PPP3R1	1
2:68477248:C:T	eQTLcatalogue	CEDAR_B-cell_CD19	ENSG00000243667	T	1.82844e-09	-0.0920697	9.1422e-06	C	+	2	68477248	WDR92	1
2:68477248:C:T	eQTLcatalogue	CEDAR_B-cell_CD19	ENSG00000221823	T	8.31107e-06	0.171666	0.0415554	C	-	2	68477248	PPP3R1	1
2:68478919:A:G	eQTLcatalogue	CEDAR_B-cell_CD19	ENSG00000243667	A	3.74071e-09	-0.0907638	1.87035e-05	G	+	2	68478919	WDR92	1
2:68385097:A:G	eQTLcatalogue	CEDAR_monocyte_CD14	ENSG00000243667	A	6.78461e-07	-0.0418074	0.0033923	G	+	2	68385097	WDR92	1
2:68393144:A:T	eQTLcatalogue	CEDAR_monocyte_CD14	ENSG00000243667	T	2.10672e-07	-0.0433607	0.00105336	A	+	2	68393144	WDR92	1
2:68394184:C:T	eQTLcatalogue	CEDAR_monocyte_CD14	ENSG00000243667	C	2.11516e-07	-0.0433601	0.00105758	T	+	2	68394184	WDR92	1
2:68395631:A:G	eQTLcatalogue	CEDAR_monocyte_CD14	ENSG00000243667	G	2.1162e-07	-0.0433565	0.0010581	A	+	2	68395631	WDR92	1
2:68398919:C:G	eQTLcatalogue	CEDAR_monocyte_CD14	ENSG00000243667	G	1.99992e-07	-0.0434604	0.00099996	C	+	2	68398919	WDR92	1
2:68399190:C:T	eQTLcatalogue	CEDAR_monocyte_CD14	ENSG00000243667	C	2.14424e-07	-0.0433173	0.00107212	T	+	2	68399190	WDR92	1
2:68402012:G:T	eQTLcatalogue	CEDAR_monocyte_CD14	ENSG00000243667	G	2.20654e-07	-0.043254	0.00110327	T	+	2	68402012	WDR92	1
2:68402830:C:G	eQTLcatalogue	CEDAR_monocyte_CD14	ENSG00000243667	G	2.20662e-07	-0.0432549	0.00110331	C	+	2	68402830	WDR92	1
2:68410372:A:C	eQTLcatalogue	CEDAR_monocyte_CD14	ENSG00000243667	C	1.86146e-07	-0.0436589	0.00093073	A	+	2	68410372	WDR92	1
2:68410660:G:T	eQTLcatalogue	CEDAR_monocyte_CD14	ENSG00000243667	T	1.86251e-07	-0.0436595	0.000931255	G	+	2	68410660	WDR92	1
2:68411414:A:G	eQTLcatalogue	CEDAR_monocyte_CD14	ENSG00000243667	G	1.86415e-07	-0.0436601	0.000932075	A	+	2	68411414	WDR92	1
2:68418868:A:T	eQTLcatalogue	CEDAR_monocyte_CD14	ENSG00000243667	A	1.84684e-07	-0.0437074	0.00092342	T	+	2	68418868	WDR92	1
2:68419487:A:G	eQTLcatalogue	CEDAR_monocyte_CD14	ENSG00000243667	G	1.85024e-07	-0.0437054	0.00092512	A	+	2	68419487	WDR92	1
2:68420070:G:T	eQTLcatalogue	CEDAR_monocyte_CD14	ENSG00000243667	G	1.85157e-07	-0.0437045	0.000925785	T	+	2	68420070	WDR92	1
2:68421049:A:G	eQTLcatalogue	CEDAR_monocyte_CD14	ENSG00000243667	G	1.85244e-07	-0.0437032	0.00092622	A	+	2	68421049	WDR92	1
2:68422771:A:G	eQTLcatalogue	CEDAR_monocyte_CD14	ENSG00000243667	G	1.84959e-07	-0.0437043	0.000924795	A	+	2	68422771	WDR92	1
2:68423530:A:G	eQTLcatalogue	CEDAR_monocyte_CD14	ENSG00000243667	G	1.8524e-07	-0.0437006	0.0009262	A	+	2	68423530	WDR92	1
2:68430925:C:T	eQTLcatalogue	CEDAR_monocyte_CD14	ENSG00000243667	C	1.85159e-07	-0.043634	0.000925795	T	+	2	68430925	WDR92	1
2:68431259:A:G	eQTLcatalogue	CEDAR_monocyte_CD14	ENSG00000243667	G	1.8503e-07	-0.0436318	0.00092515	A	+	2	68431259	WDR92	1
2:68433831:A:G	eQTLcatalogue	CEDAR_monocyte_CD14	ENSG00000243667	G	1.84711e-07	-0.0435984	0.000923555	A	+	2	68433831	WDR92	1
2:68435431:C:G	eQTLcatalogue	CEDAR_monocyte_CD14	ENSG00000243667	C	1.62056e-07	-0.0439692	0.00081028	G	+	2	68435431	WDR92	1
2:68438614:C:T	eQTLcatalogue	CEDAR_monocyte_CD14	ENSG00000243667	C	1.61939e-07	-0.0441519	0.000809695	T	+	2	68438614	WDR92	1
2:68439960:C:T	eQTLcatalogue	CEDAR_monocyte_CD14	ENSG00000243667	C	1.40837e-07	-0.0443521	0.000704185	T	+	2	68439960	WDR92	1
2:68443651:A:G	eQTLcatalogue	CEDAR_monocyte_CD14	ENSG00000243667	A	1.53704e-07	-0.0444398	0.00076852	G	+	2	68443651	WDR92	1
2:68443835:A:T	eQTLcatalogue	CEDAR_monocyte_CD14	ENSG00000243667	A	1.30411e-07	-0.0446646	0.000652055	T	+	2	68443835	WDR92	1
2:68446936:C:T	eQTLcatalogue	CEDAR_monocyte_CD14	ENSG00000243667	C	1.36807e-07	-0.0448397	0.000684035	T	+	2	68446936	WDR92	1
2:68457573:C:T	eQTLcatalogue	CEDAR_monocyte_CD14	ENSG00000243667	C	1.16774e-07	-0.0455038	0.00058387	T	+	2	68457573	WDR92	1
2:68457854:A:G	eQTLcatalogue	CEDAR_monocyte_CD14	ENSG00000243667	A	1.16793e-07	-0.0455107	0.000583965	G	+	2	68457854	WDR92	1
2:68463612:A:G	eQTLcatalogue	CEDAR_monocyte_CD14	ENSG00000243667	G	9.97047e-08	-0.0459555	0.000498523	A	+	2	68463612	WDR92	1
2:68467910:A:C	eQTLcatalogue	CEDAR_monocyte_CD14	ENSG00000243667	A	1.04298e-07	-0.0459104	0.00052149	C	+	2	68467910	WDR92	1
2:68475595:A:C	eQTLcatalogue	CEDAR_monocyte_CD14	ENSG00000243667	C	1.02919e-07	-0.045984	0.000514595	A	+	2	68475595	WDR92	1
2:68477248:C:T	eQTLcatalogue	CEDAR_monocyte_CD14	ENSG00000243667	T	1.15404e-07	-0.0459785	0.00057702	C	+	2	68477248	WDR92	1
2:68477248:C:T	eQTLcatalogue	CEDAR_monocyte_CD14	ENSG00000221823	T	9.15776e-06	0.188732	0.0457888	C	-	2	68477248	PPP3R1	1
2:68478919:A:G	eQTLcatalogue	CEDAR_monocyte_CD14	ENSG00000243667	A	2.00698e-07	-0.0454118	0.00100349	G	+	2	68478919	WDR92	1
2:68478919:A:G	eQTLcatalogue	CEDAR_monocyte_CD14	ENSG00000221823	A	9.43335e-06	0.18962	0.0471668	G	-	2	68478919	PPP3R1	1
5:416118:A:G	eQTLcatalogue	CEDAR_neutrophil_CD15	ENSG00000180104	G	1.75115e-15	-0.106728	8.75575e-12	A	+	5	416118	EXOC3	1
5:416672:A:G	eQTLcatalogue	CEDAR_neutrophil_CD15	ENSG00000180104	G	1.06758e-15	-0.107406	5.3379e-12	A	+	5	416672	EXOC3	1
5:418093:A:G	eQTLcatalogue	CEDAR_neutrophil_CD15	ENSG00000180104	A	2.62749e-11	-0.111639	1.31375e-07	G	+	5	418093	EXOC3	1
5:418494:A:G	eQTLcatalogue	CEDAR_neutrophil_CD15	ENSG00000180104	A	4.47413e-16	-0.108463	2.23707e-12	G	+	5	418494	EXOC3	1
5:421193:C:G	eQTLcatalogue	CEDAR_neutrophil_CD15	ENSG00000180104	G	1.95929e-14	-0.102775	9.79645e-11	C	+	5	421193	EXOC3	1
5:421403:A:G	eQTLcatalogue	CEDAR_neutrophil_CD15	ENSG00000180104	G	1.25093e-16	-0.110239	6.25465e-13	A	+	5	421403	EXOC3	1
5:421426:A:C	eQTLcatalogue	CEDAR_neutrophil_CD15	ENSG00000180104	A	1.50931e-11	-0.113717	7.54655e-08	C	+	5	421426	EXOC3	1
5:421455:G:T	eQTLcatalogue	CEDAR_neutrophil_CD15	ENSG00000180104	G	7.27532e-17	-0.110134	3.63766e-13	T	+	5	421455	EXOC3	1
5:422178:A:G	eQTLcatalogue	CEDAR_neutrophil_CD15	ENSG00000180104	G	6.43587e-23	-0.118878	3.21794e-19	A	+	5	422178	EXOC3	1
5:423169:C:T	eQTLcatalogue	CEDAR_neutrophil_CD15	ENSG00000180104	C	6.83954e-23	-0.118359	3.41977e-19	T	+	5	423169	EXOC3	1
5:423595:C:T	eQTLcatalogue	CEDAR_neutrophil_CD15	ENSG00000180104	C	7.8131e-23	-0.118269	3.90655e-19	T	+	5	423595	EXOC3	1
5:423671:C:T	eQTLcatalogue	CEDAR_neutrophil_CD15	ENSG00000180104	C	8.07505e-23	-0.118259	4.03753e-19	T	+	5	423671	EXOC3	1
5:423906:A:G	eQTLcatalogue	CEDAR_neutrophil_CD15	ENSG00000180104	G	8.35495e-23	-0.11825	4.17748e-19	A	+	5	423906	EXOC3	1
5:428236:A:C	eQTLcatalogue	CEDAR_neutrophil_CD15	ENSG00000180104	C	2.786e-22	-0.116587	1.393e-18	A	+	5	428236	EXOC3	1
5:429124:C:G	eQTLcatalogue	CEDAR_neutrophil_CD15	ENSG00000180104	C	2.7627e-22	-0.116602	1.38135e-18	G	+	5	429124	EXOC3	1
5:429818:C:G	eQTLcatalogue	CEDAR_neutrophil_CD15	ENSG00000180104	C	2.73813e-22	-0.116615	1.36907e-18	G	+	5	429818	EXOC3	1
5:430059:A:G	eQTLcatalogue	CEDAR_neutrophil_CD15	ENSG00000180104	G	2.73813e-22	-0.116615	1.36907e-18	A	+	5	430059	EXOC3	1
5:430217:C:T	eQTLcatalogue	CEDAR_neutrophil_CD15	ENSG00000180104	C	1.25998e-14	-0.0955821	6.2999e-11	T	+	5	430217	EXOC3	1
5:434722:C:G	eQTLcatalogue	CEDAR_neutrophil_CD15	ENSG00000180104	G	6.68826e-22	-0.114959	3.34413e-18	C	+	5	434722	EXOC3	1
5:436981:A:G	eQTLcatalogue	CEDAR_neutrophil_CD15	ENSG00000180104	A	9.7309e-19	-0.110177	4.86545e-15	G	+	5	436981	EXOC3	1
5:437542:C:T	eQTLcatalogue	CEDAR_neutrophil_CD15	ENSG00000180104	T	1.75405e-22	-0.117144	8.77025e-19	C	+	5	437542	EXOC3	1
5:437586:A:G	eQTLcatalogue	CEDAR_neutrophil_CD15	ENSG00000180104	G	1.7369e-22	-0.117154	8.6845e-19	A	+	5	437586	EXOC3	1
5:437667:A:G	eQTLcatalogue	CEDAR_neutrophil_CD15	ENSG00000180104	G	1.69838e-22	-0.117177	8.4919e-19	A	+	5	437667	EXOC3	1
5:437862:C:G	eQTLcatalogue	CEDAR_neutrophil_CD15	ENSG00000180104	G	1.59301e-22	-0.117244	7.96505e-19	C	+	5	437862	EXOC3	1
2:68385097:A:G	eQTLcatalogue	CEDAR_T-cell_CD4	ENSG00000243667	A	6.16724e-10	-0.0511707	3.08362e-06	G	+	2	68385097	WDR92	1
2:68393144:A:T	eQTLcatalogue	CEDAR_T-cell_CD4	ENSG00000243667	T	3.36578e-11	-0.0541298	1.68289e-07	A	+	2	68393144	WDR92	1
2:68394184:C:T	eQTLcatalogue	CEDAR_T-cell_CD4	ENSG00000243667	C	3.33948e-11	-0.0541391	1.66974e-07	T	+	2	68394184	WDR92	1
2:68395631:A:G	eQTLcatalogue	CEDAR_T-cell_CD4	ENSG00000243667	G	3.33121e-11	-0.0541325	1.66561e-07	A	+	2	68395631	WDR92	1
2:68398919:C:G	eQTLcatalogue	CEDAR_T-cell_CD4	ENSG00000243667	G	2.79552e-11	-0.054429	1.39776e-07	C	+	2	68398919	WDR92	1
2:68399190:C:T	eQTLcatalogue	CEDAR_T-cell_CD4	ENSG00000243667	C	2.70521e-11	-0.0544155	1.3526e-07	T	+	2	68399190	WDR92	1
2:68402012:G:T	eQTLcatalogue	CEDAR_T-cell_CD4	ENSG00000243667	G	2.74275e-11	-0.054358	1.37138e-07	T	+	2	68402012	WDR92	1
2:68402830:C:G	eQTLcatalogue	CEDAR_T-cell_CD4	ENSG00000243667	G	2.7426e-11	-0.0543597	1.3713e-07	C	+	2	68402830	WDR92	1
2:68410372:A:C	eQTLcatalogue	CEDAR_T-cell_CD4	ENSG00000243667	C	1.15365e-11	-0.0554997	5.76825e-08	A	+	2	68410372	WDR92	1
2:68410660:G:T	eQTLcatalogue	CEDAR_T-cell_CD4	ENSG00000243667	T	1.1534e-11	-0.0555018	5.767e-08	G	+	2	68410660	WDR92	1
2:68411414:A:G	eQTLcatalogue	CEDAR_T-cell_CD4	ENSG00000243667	G	1.15245e-11	-0.0555044	5.76225e-08	A	+	2	68411414	WDR92	1
2:68418868:A:T	eQTLcatalogue	CEDAR_T-cell_CD4	ENSG00000243667	A	1.15159e-11	-0.0555499	5.75795e-08	T	+	2	68418868	WDR92	1
2:68419487:A:G	eQTLcatalogue	CEDAR_T-cell_CD4	ENSG00000243667	G	1.15186e-11	-0.0555504	5.7593e-08	A	+	2	68419487	WDR92	1
2:68420070:G:T	eQTLcatalogue	CEDAR_T-cell_CD4	ENSG00000243667	G	1.15178e-11	-0.0555507	5.7589e-08	T	+	2	68420070	WDR92	1
2:68421049:A:G	eQTLcatalogue	CEDAR_T-cell_CD4	ENSG00000243667	G	1.15063e-11	-0.0555511	5.75315e-08	A	+	2	68421049	WDR92	1
2:68422771:A:G	eQTLcatalogue	CEDAR_T-cell_CD4	ENSG00000243667	G	1.14984e-11	-0.0555501	5.7492e-08	A	+	2	68422771	WDR92	1
2:68423530:A:G	eQTLcatalogue	CEDAR_T-cell_CD4	ENSG00000243667	G	1.15008e-11	-0.0555483	5.7504e-08	A	+	2	68423530	WDR92	1
2:68430925:C:T	eQTLcatalogue	CEDAR_T-cell_CD4	ENSG00000243667	C	1.12243e-11	-0.0554876	5.61215e-08	T	+	2	68430925	WDR92	1
2:68431259:A:G	eQTLcatalogue	CEDAR_T-cell_CD4	ENSG00000243667	G	1.12412e-11	-0.0554815	5.6206e-08	A	+	2	68431259	WDR92	1
2:68433831:A:G	eQTLcatalogue	CEDAR_T-cell_CD4	ENSG00000243667	G	1.1312e-11	-0.0554269	5.656e-08	A	+	2	68433831	WDR92	1
2:68435431:C:G	eQTLcatalogue	CEDAR_T-cell_CD4	ENSG00000243667	C	1.55224e-11	-0.0552948	7.7612e-08	G	+	2	68435431	WDR92	1
2:68438614:C:T	eQTLcatalogue	CEDAR_T-cell_CD4	ENSG00000243667	C	9.15133e-12	-0.0561203	4.57567e-08	T	+	2	68438614	WDR92	1
2:68439960:C:T	eQTLcatalogue	CEDAR_T-cell_CD4	ENSG00000243667	C	1.14282e-11	-0.0558721	5.7141e-08	T	+	2	68439960	WDR92	1
2:68443651:A:G	eQTLcatalogue	CEDAR_T-cell_CD4	ENSG00000243667	A	1.16923e-11	-0.0561253	5.84615e-08	G	+	2	68443651	WDR92	1
2:68443835:A:T	eQTLcatalogue	CEDAR_T-cell_CD4	ENSG00000243667	A	1.02105e-11	-0.0562513	5.10525e-08	T	+	2	68443835	WDR92	1
2:68446936:C:T	eQTLcatalogue	CEDAR_T-cell_CD4	ENSG00000243667	C	7.51461e-12	-0.0568972	3.75731e-08	T	+	2	68446936	WDR92	1
2:68457573:C:T	eQTLcatalogue	CEDAR_T-cell_CD4	ENSG00000243667	C	5.34984e-12	-0.0578354	2.67492e-08	T	+	2	68457573	WDR92	1
2:68457854:A:G	eQTLcatalogue	CEDAR_T-cell_CD4	ENSG00000243667	A	5.31931e-12	-0.0578512	2.65965e-08	G	+	2	68457854	WDR92	1
2:68463612:A:G	eQTLcatalogue	CEDAR_T-cell_CD4	ENSG00000243667	G	5.96678e-12	-0.0580557	2.98339e-08	A	+	2	68463612	WDR92	1
2:68467910:A:C	eQTLcatalogue	CEDAR_T-cell_CD4	ENSG00000243667	A	4.5343e-12	-0.0583425	2.26715e-08	C	+	2	68467910	WDR92	1
2:68475595:A:C	eQTLcatalogue	CEDAR_T-cell_CD4	ENSG00000243667	C	4.2347e-12	-0.0585069	2.11735e-08	A	+	2	68475595	WDR92	1
2:68477248:C:T	eQTLcatalogue	CEDAR_T-cell_CD4	ENSG00000243667	T	3.8804e-12	-0.0588277	1.9402e-08	C	+	2	68477248	WDR92	1
2:68478919:A:G	eQTLcatalogue	CEDAR_T-cell_CD4	ENSG00000243667	A	3.46064e-12	-0.0592842	1.73032e-08	G	+	2	68478919	WDR92	1
2:68385097:A:G	eQTLcatalogue	CEDAR_T-cell_CD8	ENSG00000243667	A	6.67847e-10	-0.054291	3.33924e-06	G	+	2	68385097	WDR92	1
2:68385097:A:G	eQTLcatalogue	CEDAR_T-cell_CD8	ENSG00000221823	A	4.46366e-06	0.15646	0.0223183	G	-	2	68385097	PPP3R1	1
2:68393144:A:T	eQTLcatalogue	CEDAR_T-cell_CD8	ENSG00000243667	T	5.17165e-10	-0.0541843	2.58582e-06	A	+	2	68393144	WDR92	1
2:68394184:C:T	eQTLcatalogue	CEDAR_T-cell_CD8	ENSG00000243667	C	5.26767e-10	-0.0541625	2.63383e-06	T	+	2	68394184	WDR92	1
2:68395631:A:G	eQTLcatalogue	CEDAR_T-cell_CD8	ENSG00000243667	G	5.39837e-10	-0.0541217	2.69918e-06	A	+	2	68395631	WDR92	1
2:68398919:C:G	eQTLcatalogue	CEDAR_T-cell_CD8	ENSG00000243667	G	1.06999e-09	-0.0533352	5.34995e-06	C	+	2	68398919	WDR92	1
2:68399190:C:T	eQTLcatalogue	CEDAR_T-cell_CD8	ENSG00000243667	C	1.11335e-09	-0.053236	5.56675e-06	T	+	2	68399190	WDR92	1
2:68402012:G:T	eQTLcatalogue	CEDAR_T-cell_CD8	ENSG00000243667	G	1.19132e-09	-0.0531072	5.9566e-06	T	+	2	68402012	WDR92	1
2:68402830:C:G	eQTLcatalogue	CEDAR_T-cell_CD8	ENSG00000243667	G	1.1908e-09	-0.0531093	5.954e-06	C	+	2	68402830	WDR92	1
2:68410372:A:C	eQTLcatalogue	CEDAR_T-cell_CD8	ENSG00000243667	C	4.13964e-10	-0.0546506	2.06982e-06	A	+	2	68410372	WDR92	1
2:68410660:G:T	eQTLcatalogue	CEDAR_T-cell_CD8	ENSG00000243667	T	4.1445e-10	-0.0546508	2.07225e-06	G	+	2	68410660	WDR92	1
2:68411414:A:G	eQTLcatalogue	CEDAR_T-cell_CD8	ENSG00000243667	G	4.14577e-10	-0.0546528	2.07288e-06	A	+	2	68411414	WDR92	1
2:68418868:A:T	eQTLcatalogue	CEDAR_T-cell_CD8	ENSG00000243667	A	4.13164e-10	-0.0546996	2.06582e-06	T	+	2	68418868	WDR92	1
2:68419487:A:G	eQTLcatalogue	CEDAR_T-cell_CD8	ENSG00000243667	G	4.13126e-10	-0.0547006	2.06563e-06	A	+	2	68419487	WDR92	1
2:68420070:G:T	eQTLcatalogue	CEDAR_T-cell_CD8	ENSG00000243667	G	4.132e-10	-0.0547005	2.066e-06	T	+	2	68420070	WDR92	1
2:68421049:A:G	eQTLcatalogue	CEDAR_T-cell_CD8	ENSG00000243667	G	4.1339e-10	-0.0546993	2.06695e-06	A	+	2	68421049	WDR92	1
2:68422771:A:G	eQTLcatalogue	CEDAR_T-cell_CD8	ENSG00000243667	G	4.14116e-10	-0.0546954	2.07058e-06	A	+	2	68422771	WDR92	1
2:68423530:A:G	eQTLcatalogue	CEDAR_T-cell_CD8	ENSG00000243667	G	4.14057e-10	-0.0546938	2.07029e-06	A	+	2	68423530	WDR92	1
2:68430925:C:T	eQTLcatalogue	CEDAR_T-cell_CD8	ENSG00000243667	C	4.13721e-10	-0.0546108	2.0686e-06	T	+	2	68430925	WDR92	1
2:68431259:A:G	eQTLcatalogue	CEDAR_T-cell_CD8	ENSG00000243667	G	4.14267e-10	-0.0546046	2.07133e-06	A	+	2	68431259	WDR92	1
2:68433831:A:G	eQTLcatalogue	CEDAR_T-cell_CD8	ENSG00000243667	G	4.14694e-10	-0.054558	2.07347e-06	A	+	2	68433831	WDR92	1
2:68435431:C:G	eQTLcatalogue	CEDAR_T-cell_CD8	ENSG00000243667	C	2.75362e-10	-0.0552995	1.37681e-06	G	+	2	68435431	WDR92	1
2:68438614:C:T	eQTLcatalogue	CEDAR_T-cell_CD8	ENSG00000243667	C	4.43292e-10	-0.0548999	2.21646e-06	T	+	2	68438614	WDR92	1
2:68439960:C:T	eQTLcatalogue	CEDAR_T-cell_CD8	ENSG00000243667	C	5.16543e-10	-0.0547541	2.58272e-06	T	+	2	68439960	WDR92	1
2:68443651:A:G	eQTLcatalogue	CEDAR_T-cell_CD8	ENSG00000243667	A	6.06503e-10	-0.0548061	3.03252e-06	G	+	2	68443651	WDR92	1
2:68443835:A:T	eQTLcatalogue	CEDAR_T-cell_CD8	ENSG00000243667	A	5.4307e-10	-0.0549259	2.71535e-06	T	+	2	68443835	WDR92	1
2:68446936:C:T	eQTLcatalogue	CEDAR_T-cell_CD8	ENSG00000243667	C	5.00921e-10	-0.0552222	2.50461e-06	T	+	2	68446936	WDR92	1
2:68457573:C:T	eQTLcatalogue	CEDAR_T-cell_CD8	ENSG00000243667	C	6.54887e-10	-0.0554026	3.27443e-06	T	+	2	68457573	WDR92	1
2:68457854:A:G	eQTLcatalogue	CEDAR_T-cell_CD8	ENSG00000243667	A	6.54712e-10	-0.0554116	3.27356e-06	G	+	2	68457854	WDR92	1
2:68463612:A:G	eQTLcatalogue	CEDAR_T-cell_CD8	ENSG00000243667	G	7.82581e-10	-0.0554607	3.9129e-06	A	+	2	68463612	WDR92	1
2:68467910:A:C	eQTLcatalogue	CEDAR_T-cell_CD8	ENSG00000243667	A	8.80424e-10	-0.0552802	4.40212e-06	C	+	2	68467910	WDR92	1
2:68475595:A:C	eQTLcatalogue	CEDAR_T-cell_CD8	ENSG00000243667	C	1.15644e-09	-0.0549725	5.7822e-06	A	+	2	68475595	WDR92	1
2:68477248:C:T	eQTLcatalogue	CEDAR_T-cell_CD8	ENSG00000243667	T	1.10971e-09	-0.0552203	5.54855e-06	C	+	2	68477248	WDR92	1
2:68478919:A:G	eQTLcatalogue	CEDAR_T-cell_CD8	ENSG00000243667	A	1.66681e-09	-0.0549657	8.33405e-06	G	+	2	68478919	WDR92	1
2:68385097:A:G	eQTLcatalogue	Fairfax_2012_B-cell_CD19	ENSG00000243667	A	8.9922e-08	-0.0634157	0.00044961	G	+	2	68385097	WDR92	1
2:68385097:A:G	eQTLcatalogue	Fairfax_2012_B-cell_CD19	ENSG00000221823	A	1.01089e-23	0.146489	5.05445e-20	G	-	2	68385097	PPP3R1	1
2:68393144:A:T	eQTLcatalogue	Fairfax_2012_B-cell_CD19	ENSG00000243667	T	2.61699e-07	-0.061781	0.0013085	A	+	2	68393144	WDR92	1
2:68393144:A:T	eQTLcatalogue	Fairfax_2012_B-cell_CD19	ENSG00000221823	T	6.45391e-26	0.153776	3.22695e-22	A	-	2	68393144	PPP3R1	1
2:68394184:C:T	eQTLcatalogue	Fairfax_2012_B-cell_CD19	ENSG00000243667	C	2.57642e-07	-0.0617734	0.00128821	T	+	2	68394184	WDR92	1
2:68394184:C:T	eQTLcatalogue	Fairfax_2012_B-cell_CD19	ENSG00000221823	C	6.38599e-26	0.153685	3.193e-22	T	-	2	68394184	PPP3R1	1
2:68395631:A:G	eQTLcatalogue	Fairfax_2012_B-cell_CD19	ENSG00000243667	G	2.53288e-07	-0.0617499	0.00126644	A	+	2	68395631	WDR92	1
2:68395631:A:G	eQTLcatalogue	Fairfax_2012_B-cell_CD19	ENSG00000221823	G	6.50289e-26	0.153516	3.25144e-22	A	-	2	68395631	PPP3R1	1
2:68398919:C:G	eQTLcatalogue	Fairfax_2012_B-cell_CD19	ENSG00000243667	G	2.48019e-07	-0.061781	0.00124009	C	+	2	68398919	WDR92	1
2:68398919:C:G	eQTLcatalogue	Fairfax_2012_B-cell_CD19	ENSG00000221823	G	7.68129e-26	0.153295	3.84064e-22	C	-	2	68398919	PPP3R1	1
2:68399190:C:T	eQTLcatalogue	Fairfax_2012_B-cell_CD19	ENSG00000243667	C	2.4539e-07	-0.061651	0.00122695	T	+	2	68399190	WDR92	1
2:68399190:C:T	eQTLcatalogue	Fairfax_2012_B-cell_CD19	ENSG00000221823	C	6.94438e-26	0.153029	3.47219e-22	T	-	2	68399190	PPP3R1	1
2:68402012:G:T	eQTLcatalogue	Fairfax_2012_B-cell_CD19	ENSG00000243667	G	2.40687e-07	-0.0615332	0.00120343	T	+	2	68402012	WDR92	1
2:68402012:G:T	eQTLcatalogue	Fairfax_2012_B-cell_CD19	ENSG00000221823	G	7.71384e-26	0.152517	3.85692e-22	T	-	2	68402012	PPP3R1	1
2:68402830:C:G	eQTLcatalogue	Fairfax_2012_B-cell_CD19	ENSG00000243667	G	2.40949e-07	-0.0615334	0.00120474	C	+	2	68402830	WDR92	1
2:68402830:C:G	eQTLcatalogue	Fairfax_2012_B-cell_CD19	ENSG00000221823	G	7.67989e-26	0.152528	3.83994e-22	C	-	2	68402830	PPP3R1	1
2:68410372:A:C	eQTLcatalogue	Fairfax_2012_B-cell_CD19	ENSG00000243667	C	2.39974e-07	-0.0616306	0.00119987	A	+	2	68410372	WDR92	1
2:68410372:A:C	eQTLcatalogue	Fairfax_2012_B-cell_CD19	ENSG00000221823	C	7.33292e-26	0.152799	3.66646e-22	A	-	2	68410372	PPP3R1	1
2:68410660:G:T	eQTLcatalogue	Fairfax_2012_B-cell_CD19	ENSG00000243667	T	2.40268e-07	-0.0616291	0.00120134	G	+	2	68410660	WDR92	1
2:68410660:G:T	eQTLcatalogue	Fairfax_2012_B-cell_CD19	ENSG00000221823	T	7.29556e-26	0.152808	3.64778e-22	G	-	2	68410660	PPP3R1	1
2:68411414:A:G	eQTLcatalogue	Fairfax_2012_B-cell_CD19	ENSG00000243667	G	2.40609e-07	-0.0616273	0.00120305	A	+	2	68411414	WDR92	1
2:68411414:A:G	eQTLcatalogue	Fairfax_2012_B-cell_CD19	ENSG00000221823	G	7.33133e-26	0.152806	3.66567e-22	A	-	2	68411414	PPP3R1	1
2:68418868:A:T	eQTLcatalogue	Fairfax_2012_B-cell_CD19	ENSG00000243667	A	2.39815e-07	-0.0616739	0.00119907	T	+	2	68418868	WDR92	1
2:68418868:A:T	eQTLcatalogue	Fairfax_2012_B-cell_CD19	ENSG00000221823	A	7.24867e-26	0.152916	3.62434e-22	T	-	2	68418868	PPP3R1	1
2:68419487:A:G	eQTLcatalogue	Fairfax_2012_B-cell_CD19	ENSG00000243667	G	2.40222e-07	-0.0616709	0.00120111	A	+	2	68419487	WDR92	1
2:68419487:A:G	eQTLcatalogue	Fairfax_2012_B-cell_CD19	ENSG00000221823	G	7.20042e-26	0.152925	3.60021e-22	A	-	2	68419487	PPP3R1	1
2:68420070:G:T	eQTLcatalogue	Fairfax_2012_B-cell_CD19	ENSG00000243667	G	2.40391e-07	-0.0616699	0.00120196	T	+	2	68420070	WDR92	1
2:68420070:G:T	eQTLcatalogue	Fairfax_2012_B-cell_CD19	ENSG00000221823	G	7.20885e-26	0.152925	3.60443e-22	T	-	2	68420070	PPP3R1	1
2:68421049:A:G	eQTLcatalogue	Fairfax_2012_B-cell_CD19	ENSG00000243667	G	2.40355e-07	-0.0616701	0.00120177	A	+	2	68421049	WDR92	1
2:68421049:A:G	eQTLcatalogue	Fairfax_2012_B-cell_CD19	ENSG00000221823	G	7.21342e-26	0.152924	3.60671e-22	A	-	2	68421049	PPP3R1	1
2:68422771:A:G	eQTLcatalogue	Fairfax_2012_B-cell_CD19	ENSG00000243667	G	2.40103e-07	-0.0616716	0.00120052	A	+	2	68422771	WDR92	1
2:68422771:A:G	eQTLcatalogue	Fairfax_2012_B-cell_CD19	ENSG00000221823	G	7.25402e-26	0.152916	3.62701e-22	A	-	2	68422771	PPP3R1	1
2:68423530:A:G	eQTLcatalogue	Fairfax_2012_B-cell_CD19	ENSG00000243667	G	2.39964e-07	-0.0616701	0.00119982	A	+	2	68423530	WDR92	1
2:68423530:A:G	eQTLcatalogue	Fairfax_2012_B-cell_CD19	ENSG00000221823	G	7.31737e-26	0.1529	3.65869e-22	A	-	2	68423530	PPP3R1	1
2:68430925:C:T	eQTLcatalogue	Fairfax_2012_B-cell_CD19	ENSG00000243667	C	2.39666e-07	-0.0615862	0.00119833	T	+	2	68430925	WDR92	1
2:68430925:C:T	eQTLcatalogue	Fairfax_2012_B-cell_CD19	ENSG00000221823	C	7.54808e-26	0.15265	3.77404e-22	T	-	2	68430925	PPP3R1	1
2:68431259:A:G	eQTLcatalogue	Fairfax_2012_B-cell_CD19	ENSG00000243667	G	2.39373e-07	-0.0615855	0.00119686	A	+	2	68431259	WDR92	1
2:68431259:A:G	eQTLcatalogue	Fairfax_2012_B-cell_CD19	ENSG00000221823	G	7.56757e-26	0.152639	3.78378e-22	A	-	2	68431259	PPP3R1	1
2:68433831:A:G	eQTLcatalogue	Fairfax_2012_B-cell_CD19	ENSG00000243667	G	2.40614e-07	-0.0615328	0.00120307	A	+	2	68433831	WDR92	1
2:68433831:A:G	eQTLcatalogue	Fairfax_2012_B-cell_CD19	ENSG00000221823	G	7.72249e-26	0.152513	3.86124e-22	A	-	2	68433831	PPP3R1	1
2:68435431:C:G	eQTLcatalogue	Fairfax_2012_B-cell_CD19	ENSG00000243667	C	2.40279e-07	-0.0617224	0.0012014	G	+	2	68435431	WDR92	1
2:68435431:C:G	eQTLcatalogue	Fairfax_2012_B-cell_CD19	ENSG00000221823	C	7.54042e-26	0.153003	3.77021e-22	G	-	2	68435431	PPP3R1	1
2:68438614:C:T	eQTLcatalogue	Fairfax_2012_B-cell_CD19	ENSG00000243667	C	2.57004e-07	-0.061873	0.00128502	T	+	2	68438614	WDR92	1
2:68438614:C:T	eQTLcatalogue	Fairfax_2012_B-cell_CD19	ENSG00000221823	C	6.35375e-26	0.153926	3.17688e-22	T	-	2	68438614	PPP3R1	1
2:68439960:C:T	eQTLcatalogue	Fairfax_2012_B-cell_CD19	ENSG00000243667	C	2.42086e-07	-0.062183	0.00121043	T	+	2	68439960	WDR92	1
2:68439960:C:T	eQTLcatalogue	Fairfax_2012_B-cell_CD19	ENSG00000221823	C	6.59339e-26	0.154335	3.29669e-22	T	-	2	68439960	PPP3R1	1
2:68443651:A:G	eQTLcatalogue	Fairfax_2012_B-cell_CD19	ENSG00000243667	A	2.51479e-07	-0.0623727	0.00125739	G	+	2	68443651	WDR92	1
2:68443651:A:G	eQTLcatalogue	Fairfax_2012_B-cell_CD19	ENSG00000221823	A	6.25988e-26	0.155069	3.12994e-22	G	-	2	68443651	PPP3R1	1
2:68443835:A:T	eQTLcatalogue	Fairfax_2012_B-cell_CD19	ENSG00000243667	A	2.52034e-07	-0.0623623	0.00126017	T	+	2	68443835	WDR92	1
2:68443835:A:T	eQTLcatalogue	Fairfax_2012_B-cell_CD19	ENSG00000221823	A	6.24891e-26	0.155057	3.12446e-22	T	-	2	68443835	PPP3R1	1
2:68446936:C:T	eQTLcatalogue	Fairfax_2012_B-cell_CD19	ENSG00000243667	C	3.04132e-07	-0.0620876	0.00152066	T	+	2	68446936	WDR92	1
2:68446936:C:T	eQTLcatalogue	Fairfax_2012_B-cell_CD19	ENSG00000221823	C	6.14333e-26	0.155408	3.07167e-22	T	-	2	68446936	PPP3R1	1
2:68457573:C:T	eQTLcatalogue	Fairfax_2012_B-cell_CD19	ENSG00000243667	C	3.47286e-07	-0.0624127	0.00173643	T	+	2	68457573	WDR92	1
2:68457573:C:T	eQTLcatalogue	Fairfax_2012_B-cell_CD19	ENSG00000221823	C	6.34079e-26	0.156919	3.1704e-22	T	-	2	68457573	PPP3R1	1
2:68457854:A:G	eQTLcatalogue	Fairfax_2012_B-cell_CD19	ENSG00000243667	A	3.66557e-07	-0.0623297	0.00183279	G	+	2	68457854	WDR92	1
2:68457854:A:G	eQTLcatalogue	Fairfax_2012_B-cell_CD19	ENSG00000221823	A	4.52371e-26	0.157396	2.26185e-22	G	-	2	68457854	PPP3R1	1
2:68463612:A:G	eQTLcatalogue	Fairfax_2012_B-cell_CD19	ENSG00000243667	G	4.03287e-07	-0.0623417	0.00201644	A	+	2	68463612	WDR92	1
2:68463612:A:G	eQTLcatalogue	Fairfax_2012_B-cell_CD19	ENSG00000221823	G	8.02377e-26	0.157308	4.01188e-22	A	-	2	68463612	PPP3R1	1
2:68467910:A:C	eQTLcatalogue	Fairfax_2012_B-cell_CD19	ENSG00000243667	A	4.35189e-07	-0.0622468	0.00217595	C	+	2	68467910	WDR92	1
2:68467910:A:C	eQTLcatalogue	Fairfax_2012_B-cell_CD19	ENSG00000221823	A	9.31744e-26	0.157327	4.65872e-22	C	-	2	68467910	PPP3R1	1
2:68475595:A:C	eQTLcatalogue	Fairfax_2012_B-cell_CD19	ENSG00000243667	C	5.28573e-07	-0.0619252	0.00264286	A	+	2	68475595	WDR92	1
2:68475595:A:C	eQTLcatalogue	Fairfax_2012_B-cell_CD19	ENSG00000221823	C	1.49508e-25	0.157075	7.4754e-22	A	-	2	68475595	PPP3R1	1
2:68477248:C:T	eQTLcatalogue	Fairfax_2012_B-cell_CD19	ENSG00000243667	T	4.8333e-07	-0.0624015	0.00241665	C	+	2	68477248	WDR92	1
2:68477248:C:T	eQTLcatalogue	Fairfax_2012_B-cell_CD19	ENSG00000221823	T	2.60344e-25	0.157115	1.30172e-21	C	-	2	68477248	PPP3R1	1
2:68478919:A:G	eQTLcatalogue	Fairfax_2012_B-cell_CD19	ENSG00000243667	A	4.27999e-07	-0.0625528	0.00214	G	+	2	68478919	WDR92	1
2:68478919:A:G	eQTLcatalogue	Fairfax_2012_B-cell_CD19	ENSG00000221823	A	1.18236e-24	0.155002	5.9118e-21	G	-	2	68478919	PPP3R1	1
2:68385097:A:G	eQTLcatalogue	Fairfax_2014_IFN24	ENSG00000243667	A	4.4721e-07	-0.0657429	0.00223605	G	+	2	68385097	WDR92	1
2:68385097:A:G	eQTLcatalogue	Fairfax_2014_IFN24	ENSG00000115946	A	1.73545e-11	-0.0808512	8.67725e-08	G	+	2	68385097	PNO1	1
2:68385097:A:G	eQTLcatalogue	Fairfax_2014_IFN24	ENSG00000221823	A	9.60319e-23	0.156591	4.80159e-19	G	-	2	68385097	PPP3R1	1
2:68393144:A:T	eQTLcatalogue	Fairfax_2014_IFN24	ENSG00000243667	T	6.22123e-06	-0.0595499	0.0311062	A	+	2	68393144	WDR92	1
2:68393144:A:T	eQTLcatalogue	Fairfax_2014_IFN24	ENSG00000115946	T	3.14272e-11	-0.0805375	1.57136e-07	A	+	2	68393144	PNO1	1
2:68393144:A:T	eQTLcatalogue	Fairfax_2014_IFN24	ENSG00000221823	T	2.93061e-25	0.165802	1.46531e-21	A	-	2	68393144	PPP3R1	1
2:68394184:C:T	eQTLcatalogue	Fairfax_2014_IFN24	ENSG00000243667	C	6.43714e-06	-0.0594242	0.0321857	T	+	2	68394184	WDR92	1
2:68394184:C:T	eQTLcatalogue	Fairfax_2014_IFN24	ENSG00000115946	C	3.22726e-11	-0.0804481	1.61363e-07	T	+	2	68394184	PNO1	1
2:68394184:C:T	eQTLcatalogue	Fairfax_2014_IFN24	ENSG00000221823	C	2.59694e-25	0.165869	1.29847e-21	T	-	2	68394184	PPP3R1	1
2:68395631:A:G	eQTLcatalogue	Fairfax_2014_IFN24	ENSG00000243667	G	6.62641e-06	-0.059295	0.0331321	A	+	2	68395631	WDR92	1
2:68395631:A:G	eQTLcatalogue	Fairfax_2014_IFN24	ENSG00000115946	G	3.36825e-11	-0.0803078	1.68413e-07	A	+	2	68395631	PNO1	1
2:68395631:A:G	eQTLcatalogue	Fairfax_2014_IFN24	ENSG00000221823	G	2.27313e-25	0.165902	1.13656e-21	A	-	2	68395631	PPP3R1	1
2:68398919:C:G	eQTLcatalogue	Fairfax_2014_IFN24	ENSG00000243667	G	6.9233e-06	-0.0591795	0.0346165	C	+	2	68398919	WDR92	1
2:68398919:C:G	eQTLcatalogue	Fairfax_2014_IFN24	ENSG00000115946	G	4.04971e-11	-0.080002	2.02486e-07	C	+	2	68398919	PNO1	1
2:68398919:C:G	eQTLcatalogue	Fairfax_2014_IFN24	ENSG00000221823	G	1.83228e-25	0.166193	9.1614e-22	C	-	2	68398919	PPP3R1	1
2:68399190:C:T	eQTLcatalogue	Fairfax_2014_IFN24	ENSG00000243667	C	7.18195e-06	-0.0589369	0.0359098	T	+	2	68399190	WDR92	1
2:68399190:C:T	eQTLcatalogue	Fairfax_2014_IFN24	ENSG00000115946	C	3.75214e-11	-0.0799375	1.87607e-07	T	+	2	68399190	PNO1	1
2:68399190:C:T	eQTLcatalogue	Fairfax_2014_IFN24	ENSG00000221823	C	1.68902e-25	0.165897	8.4451e-22	T	-	2	68399190	PPP3R1	1
2:68402012:G:T	eQTLcatalogue	Fairfax_2014_IFN24	ENSG00000243667	G	7.82537e-06	-0.0585689	0.0391268	T	+	2	68402012	WDR92	1
2:68402012:G:T	eQTLcatalogue	Fairfax_2014_IFN24	ENSG00000115946	G	4.18707e-11	-0.0795705	2.09353e-07	T	+	2	68402012	PNO1	1
2:68402012:G:T	eQTLcatalogue	Fairfax_2014_IFN24	ENSG00000221823	G	1.35114e-25	0.165807	6.7557e-22	T	-	2	68402012	PPP3R1	1
2:68402830:C:G	eQTLcatalogue	Fairfax_2014_IFN24	ENSG00000243667	G	7.82513e-06	-0.0585703	0.0391257	C	+	2	68402830	WDR92	1
2:68402830:C:G	eQTLcatalogue	Fairfax_2014_IFN24	ENSG00000115946	G	4.18428e-11	-0.0795735	2.09214e-07	C	+	2	68402830	PNO1	1
2:68402830:C:G	eQTLcatalogue	Fairfax_2014_IFN24	ENSG00000221823	G	1.35253e-25	0.16581	6.76265e-22	C	-	2	68402830	PPP3R1	1
2:68410372:A:C	eQTLcatalogue	Fairfax_2014_IFN24	ENSG00000243667	C	7.89932e-06	-0.0586281	0.0394966	A	+	2	68410372	WDR92	1
2:68410372:A:C	eQTLcatalogue	Fairfax_2014_IFN24	ENSG00000115946	C	3.93903e-11	-0.0797889	1.96951e-07	A	+	2	68410372	PNO1	1
2:68410372:A:C	eQTLcatalogue	Fairfax_2014_IFN24	ENSG00000221823	C	1.28273e-25	0.166115	6.41365e-22	A	-	2	68410372	PPP3R1	1
2:68410660:G:T	eQTLcatalogue	Fairfax_2014_IFN24	ENSG00000243667	T	7.89682e-06	-0.0586303	0.0394841	G	+	2	68410660	WDR92	1
2:68410660:G:T	eQTLcatalogue	Fairfax_2014_IFN24	ENSG00000115946	T	3.93225e-11	-0.0797936	1.96613e-07	G	+	2	68410660	PNO1	1
2:68410660:G:T	eQTLcatalogue	Fairfax_2014_IFN24	ENSG00000221823	T	1.28167e-25	0.16612	6.40835e-22	G	-	2	68410660	PPP3R1	1
2:68411414:A:G	eQTLcatalogue	Fairfax_2014_IFN24	ENSG00000243667	G	7.90252e-06	-0.0586304	0.0395126	A	+	2	68411414	WDR92	1
2:68411414:A:G	eQTLcatalogue	Fairfax_2014_IFN24	ENSG00000115946	G	3.91591e-11	-0.0798034	1.95796e-07	A	+	2	68411414	PNO1	1
2:68411414:A:G	eQTLcatalogue	Fairfax_2014_IFN24	ENSG00000221823	G	1.28503e-25	0.166122	6.42515e-22	A	-	2	68411414	PPP3R1	1
2:68418868:A:T	eQTLcatalogue	Fairfax_2014_IFN24	ENSG00000243667	A	7.88674e-06	-0.0586738	0.0394337	T	+	2	68418868	WDR92	1
2:68418868:A:T	eQTLcatalogue	Fairfax_2014_IFN24	ENSG00000115946	A	3.93221e-11	-0.0798481	1.9661e-07	T	+	2	68418868	PNO1	1
2:68418868:A:T	eQTLcatalogue	Fairfax_2014_IFN24	ENSG00000221823	A	1.29219e-25	0.166222	6.46095e-22	T	-	2	68418868	PPP3R1	1
2:68419487:A:G	eQTLcatalogue	Fairfax_2014_IFN24	ENSG00000243667	G	7.87773e-06	-0.0586783	0.0393886	A	+	2	68419487	WDR92	1
2:68419487:A:G	eQTLcatalogue	Fairfax_2014_IFN24	ENSG00000115946	G	3.92879e-11	-0.0798514	1.96439e-07	A	+	2	68419487	PNO1	1
2:68419487:A:G	eQTLcatalogue	Fairfax_2014_IFN24	ENSG00000221823	G	1.2927e-25	0.166226	6.4635e-22	A	-	2	68419487	PPP3R1	1
2:68420070:G:T	eQTLcatalogue	Fairfax_2014_IFN24	ENSG00000243667	G	7.87891e-06	-0.0586784	0.0393946	T	+	2	68420070	WDR92	1
2:68420070:G:T	eQTLcatalogue	Fairfax_2014_IFN24	ENSG00000115946	G	3.93753e-11	-0.0798484	1.96876e-07	T	+	2	68420070	PNO1	1
2:68420070:G:T	eQTLcatalogue	Fairfax_2014_IFN24	ENSG00000221823	G	1.29284e-25	0.166227	6.4642e-22	T	-	2	68420070	PPP3R1	1
2:68421049:A:G	eQTLcatalogue	Fairfax_2014_IFN24	ENSG00000243667	G	7.88172e-06	-0.0586774	0.0394086	A	+	2	68421049	WDR92	1
2:68421049:A:G	eQTLcatalogue	Fairfax_2014_IFN24	ENSG00000115946	G	3.94283e-11	-0.079846	1.97141e-07	A	+	2	68421049	PNO1	1
2:68421049:A:G	eQTLcatalogue	Fairfax_2014_IFN24	ENSG00000221823	G	1.29619e-25	0.166224	6.48095e-22	A	-	2	68421049	PPP3R1	1
2:68422771:A:G	eQTLcatalogue	Fairfax_2014_IFN24	ENSG00000243667	G	7.87179e-06	-0.058679	0.0393589	A	+	2	68422771	WDR92	1
2:68422771:A:G	eQTLcatalogue	Fairfax_2014_IFN24	ENSG00000115946	G	3.95263e-11	-0.0798393	1.97632e-07	A	+	2	68422771	PNO1	1
2:68422771:A:G	eQTLcatalogue	Fairfax_2014_IFN24	ENSG00000221823	G	1.29497e-25	0.16622	6.47485e-22	A	-	2	68422771	PPP3R1	1
2:68423530:A:G	eQTLcatalogue	Fairfax_2014_IFN24	ENSG00000243667	G	7.88287e-06	-0.0586722	0.0394144	A	+	2	68423530	WDR92	1
2:68423530:A:G	eQTLcatalogue	Fairfax_2014_IFN24	ENSG00000115946	G	3.96726e-11	-0.0798291	1.98363e-07	A	+	2	68423530	PNO1	1
2:68423530:A:G	eQTLcatalogue	Fairfax_2014_IFN24	ENSG00000221823	G	1.2931e-25	0.166213	6.4655e-22	A	-	2	68423530	PPP3R1	1
2:68430925:C:T	eQTLcatalogue	Fairfax_2014_IFN24	ENSG00000243667	C	7.81866e-06	-0.0586161	0.0390933	T	+	2	68430925	WDR92	1
2:68430925:C:T	eQTLcatalogue	Fairfax_2014_IFN24	ENSG00000115946	C	4.15504e-11	-0.0796444	2.07752e-07	T	+	2	68430925	PNO1	1
2:68430925:C:T	eQTLcatalogue	Fairfax_2014_IFN24	ENSG00000221823	C	1.36606e-25	0.16592	6.8303e-22	T	-	2	68430925	PPP3R1	1
2:68431259:A:G	eQTLcatalogue	Fairfax_2014_IFN24	ENSG00000243667	G	7.82241e-06	-0.05861	0.0391121	A	+	2	68431259	WDR92	1
2:68431259:A:G	eQTLcatalogue	Fairfax_2014_IFN24	ENSG00000115946	G	4.15524e-11	-0.0796379	2.07762e-07	A	+	2	68431259	PNO1	1
2:68431259:A:G	eQTLcatalogue	Fairfax_2014_IFN24	ENSG00000221823	G	1.35994e-25	0.165912	6.7997e-22	A	-	2	68431259	PPP3R1	1
2:68433831:A:G	eQTLcatalogue	Fairfax_2014_IFN24	ENSG00000243667	G	7.82835e-06	-0.0585669	0.0391418	A	+	2	68433831	WDR92	1
2:68433831:A:G	eQTLcatalogue	Fairfax_2014_IFN24	ENSG00000115946	G	4.18852e-11	-0.0795687	2.09426e-07	A	+	2	68433831	PNO1	1
2:68433831:A:G	eQTLcatalogue	Fairfax_2014_IFN24	ENSG00000221823	G	1.3489e-25	0.165807	6.7445e-22	A	-	2	68433831	PPP3R1	1
2:68435431:C:G	eQTLcatalogue	Fairfax_2014_IFN24	ENSG00000243667	C	7.47555e-06	-0.0588655	0.0373777	G	+	2	68435431	WDR92	1
2:68435431:C:G	eQTLcatalogue	Fairfax_2014_IFN24	ENSG00000115946	C	4.39404e-11	-0.0797222	2.19702e-07	G	+	2	68435431	PNO1	1
2:68435431:C:G	eQTLcatalogue	Fairfax_2014_IFN24	ENSG00000221823	C	1.4789e-25	0.166176	7.3945e-22	G	-	2	68435431	PPP3R1	1
2:68438614:C:T	eQTLcatalogue	Fairfax_2014_IFN24	ENSG00000243667	C	6.61875e-06	-0.0594628	0.0330937	T	+	2	68438614	WDR92	1
2:68438614:C:T	eQTLcatalogue	Fairfax_2014_IFN24	ENSG00000115946	C	4.89711e-11	-0.079896	2.44856e-07	T	+	2	68438614	PNO1	1
2:68438614:C:T	eQTLcatalogue	Fairfax_2014_IFN24	ENSG00000221823	C	2.09077e-25	0.166472	1.04538e-21	T	-	2	68438614	PPP3R1	1
2:68439960:C:T	eQTLcatalogue	Fairfax_2014_IFN24	ENSG00000243667	C	6.39301e-06	-0.0597269	0.031965	T	+	2	68439960	WDR92	1
2:68439960:C:T	eQTLcatalogue	Fairfax_2014_IFN24	ENSG00000115946	C	4.3841e-11	-0.0803124	2.19205e-07	T	+	2	68439960	PNO1	1
2:68439960:C:T	eQTLcatalogue	Fairfax_2014_IFN24	ENSG00000221823	C	2.1445e-25	0.166912	1.07225e-21	T	-	2	68439960	PPP3R1	1
2:68443651:A:G	eQTLcatalogue	Fairfax_2014_IFN24	ENSG00000243667	A	5.18453e-06	-0.0606615	0.0259226	G	+	2	68443651	WDR92	1
2:68443651:A:G	eQTLcatalogue	Fairfax_2014_IFN24	ENSG00000115946	A	5.67544e-11	-0.0803553	2.83772e-07	G	+	2	68443651	PNO1	1
2:68443651:A:G	eQTLcatalogue	Fairfax_2014_IFN24	ENSG00000221823	A	4.00495e-25	0.167097	2.00248e-21	G	-	2	68443651	PPP3R1	1
2:68443835:A:T	eQTLcatalogue	Fairfax_2014_IFN24	ENSG00000243667	A	5.76733e-06	-0.0602521	0.0288367	T	+	2	68443835	WDR92	1
2:68443835:A:T	eQTLcatalogue	Fairfax_2014_IFN24	ENSG00000115946	A	4.96165e-11	-0.080428	2.48082e-07	T	+	2	68443835	PNO1	1
2:68443835:A:T	eQTLcatalogue	Fairfax_2014_IFN24	ENSG00000221823	A	2.93131e-25	0.167181	1.46565e-21	T	-	2	68443835	PPP3R1	1
2:68446936:C:T	eQTLcatalogue	Fairfax_2014_IFN24	ENSG00000243667	C	5.49313e-06	-0.0604904	0.0274656	T	+	2	68446936	WDR92	1
2:68446936:C:T	eQTLcatalogue	Fairfax_2014_IFN24	ENSG00000115946	C	6.2767e-11	-0.0801632	3.13835e-07	T	+	2	68446936	PNO1	1
2:68446936:C:T	eQTLcatalogue	Fairfax_2014_IFN24	ENSG00000221823	C	4.62033e-25	0.166869	2.31016e-21	T	-	2	68446936	PPP3R1	1
2:68457573:C:T	eQTLcatalogue	Fairfax_2014_IFN24	ENSG00000243667	C	3.84684e-06	-0.0620738	0.0192342	T	+	2	68457573	WDR92	1
2:68457573:C:T	eQTLcatalogue	Fairfax_2014_IFN24	ENSG00000115946	C	1.09932e-10	-0.0799859	5.4966e-07	T	+	2	68457573	PNO1	1
2:68457573:C:T	eQTLcatalogue	Fairfax_2014_IFN24	ENSG00000221823	C	1.40158e-24	0.16705	7.0079e-21	T	-	2	68457573	PPP3R1	1
2:68457854:A:G	eQTLcatalogue	Fairfax_2014_IFN24	ENSG00000243667	A	4.30169e-06	-0.0618685	0.0215084	G	+	2	68457854	WDR92	1
2:68457854:A:G	eQTLcatalogue	Fairfax_2014_IFN24	ENSG00000115946	A	1.23432e-10	-0.0799069	6.1716e-07	G	+	2	68457854	PNO1	1
2:68457854:A:G	eQTLcatalogue	Fairfax_2014_IFN24	ENSG00000221823	A	2.52155e-24	0.166508	1.26078e-20	G	-	2	68457854	PPP3R1	1
2:68463612:A:G	eQTLcatalogue	Fairfax_2014_IFN24	ENSG00000243667	G	3.21908e-06	-0.0628245	0.0160954	A	+	2	68463612	WDR92	1
2:68463612:A:G	eQTLcatalogue	Fairfax_2014_IFN24	ENSG00000115946	G	1.58061e-10	-0.0796814	7.90305e-07	A	+	2	68463612	PNO1	1
2:68463612:A:G	eQTLcatalogue	Fairfax_2014_IFN24	ENSG00000221823	G	3.09879e-24	0.166677	1.5494e-20	A	-	2	68463612	PPP3R1	1
2:68467910:A:C	eQTLcatalogue	Fairfax_2014_IFN24	ENSG00000243667	A	2.99644e-06	-0.0630973	0.0149822	C	+	2	68467910	WDR92	1
2:68467910:A:C	eQTLcatalogue	Fairfax_2014_IFN24	ENSG00000115946	A	1.90135e-10	-0.0794488	9.50675e-07	C	+	2	68467910	PNO1	1
2:68467910:A:C	eQTLcatalogue	Fairfax_2014_IFN24	ENSG00000221823	A	4.5665e-24	0.166348	2.28325e-20	C	-	2	68467910	PPP3R1	1
2:68475595:A:C	eQTLcatalogue	Fairfax_2014_IFN24	ENSG00000243667	C	2.5045e-06	-0.0637199	0.0125225	A	+	2	68475595	WDR92	1
2:68475595:A:C	eQTLcatalogue	Fairfax_2014_IFN24	ENSG00000115946	C	3.13565e-10	-0.078712	1.56783e-06	A	+	2	68475595	PNO1	1
2:68475595:A:C	eQTLcatalogue	Fairfax_2014_IFN24	ENSG00000221823	C	1.28165e-23	0.165265	6.40825e-20	A	-	2	68475595	PPP3R1	1
2:68477248:C:T	eQTLcatalogue	Fairfax_2014_IFN24	ENSG00000243667	T	2.30983e-06	-0.06428	0.0115491	C	+	2	68477248	WDR92	1
2:68477248:C:T	eQTLcatalogue	Fairfax_2014_IFN24	ENSG00000115946	T	2.71438e-10	-0.0794015	1.35719e-06	C	+	2	68477248	PNO1	1
2:68477248:C:T	eQTLcatalogue	Fairfax_2014_IFN24	ENSG00000221823	T	1.62341e-23	0.165816	8.11705e-20	C	-	2	68477248	PPP3R1	1
2:68478919:A:G	eQTLcatalogue	Fairfax_2014_IFN24	ENSG00000243667	A	2.56263e-06	-0.0643249	0.0128131	G	+	2	68478919	WDR92	1
2:68478919:A:G	eQTLcatalogue	Fairfax_2014_IFN24	ENSG00000115946	A	3.30792e-10	-0.0794367	1.65396e-06	G	+	2	68478919	PNO1	1
2:68478919:A:G	eQTLcatalogue	Fairfax_2014_IFN24	ENSG00000221823	A	3.43839e-23	0.165571	1.71919e-19	G	-	2	68478919	PPP3R1	1
5:416118:A:G	eQTLcatalogue	Fairfax_2014_IFN24	ENSG00000063438	G	4.04492e-09	-0.126347	2.02246e-05	A	+	5	416118	AHRR	1
5:416672:A:G	eQTLcatalogue	Fairfax_2014_IFN24	ENSG00000063438	G	3.86968e-09	-0.126447	1.93484e-05	A	+	5	416672	AHRR	1
5:418093:A:G	eQTLcatalogue	Fairfax_2014_IFN24	ENSG00000063438	A	4.20504e-10	-0.181169	2.10252e-06	G	+	5	418093	AHRR	1
5:418494:A:G	eQTLcatalogue	Fairfax_2014_IFN24	ENSG00000063438	A	3.43321e-09	-0.126552	1.71661e-05	G	+	5	418494	AHRR	1
5:421193:C:G	eQTLcatalogue	Fairfax_2014_IFN24	ENSG00000063438	G	6.61195e-09	-0.124516	3.30598e-05	C	+	5	421193	AHRR	1
5:421403:A:G	eQTLcatalogue	Fairfax_2014_IFN24	ENSG00000063438	G	4.80025e-09	-0.125871	2.40012e-05	A	+	5	421403	AHRR	1
5:421426:A:C	eQTLcatalogue	Fairfax_2014_IFN24	ENSG00000063438	A	5.56561e-10	-0.183334	2.78281e-06	C	+	5	421426	AHRR	1
5:421455:G:T	eQTLcatalogue	Fairfax_2014_IFN24	ENSG00000063438	G	3.12553e-09	-0.126195	1.56276e-05	T	+	5	421455	AHRR	1
5:422178:A:G	eQTLcatalogue	Fairfax_2014_IFN24	ENSG00000063438	G	4.61955e-15	-0.157054	2.30977e-11	A	+	5	422178	AHRR	1
5:423169:C:T	eQTLcatalogue	Fairfax_2014_IFN24	ENSG00000063438	C	4.58428e-15	-0.156649	2.29214e-11	T	+	5	423169	AHRR	1
5:423595:C:T	eQTLcatalogue	Fairfax_2014_IFN24	ENSG00000063438	C	4.51248e-15	-0.156645	2.25624e-11	T	+	5	423595	AHRR	1
5:423671:C:T	eQTLcatalogue	Fairfax_2014_IFN24	ENSG00000063438	C	4.48187e-15	-0.156652	2.24093e-11	T	+	5	423671	AHRR	1
5:423906:A:G	eQTLcatalogue	Fairfax_2014_IFN24	ENSG00000063438	G	4.46294e-15	-0.156653	2.23147e-11	A	+	5	423906	AHRR	1
5:428236:A:C	eQTLcatalogue	Fairfax_2014_IFN24	ENSG00000063438	C	3.6099e-15	-0.156434	1.80495e-11	A	+	5	428236	AHRR	1
5:429124:C:G	eQTLcatalogue	Fairfax_2014_IFN24	ENSG00000063438	C	3.46919e-15	-0.156543	1.73459e-11	G	+	5	429124	AHRR	1
5:429818:C:G	eQTLcatalogue	Fairfax_2014_IFN24	ENSG00000063438	C	3.34507e-15	-0.156618	1.67253e-11	G	+	5	429818	AHRR	1
5:430059:A:G	eQTLcatalogue	Fairfax_2014_IFN24	ENSG00000063438	G	3.33771e-15	-0.156616	1.66885e-11	A	+	5	430059	AHRR	1
5:430217:C:T	eQTLcatalogue	Fairfax_2014_IFN24	ENSG00000063438	C	2.00454e-10	-0.125546	1.00227e-06	T	+	5	430217	AHRR	1
5:434722:C:G	eQTLcatalogue	Fairfax_2014_IFN24	ENSG00000063438	G	1.35066e-15	-0.157758	6.7533e-12	C	+	5	434722	AHRR	1
5:436981:A:G	eQTLcatalogue	Fairfax_2014_IFN24	ENSG00000063438	A	2.67938e-13	-0.151191	1.33969e-09	G	+	5	436981	AHRR	1
5:437542:C:T	eQTLcatalogue	Fairfax_2014_IFN24	ENSG00000063438	T	3.47958e-15	-0.156305	1.73979e-11	C	+	5	437542	AHRR	1
5:437586:A:G	eQTLcatalogue	Fairfax_2014_IFN24	ENSG00000063438	G	3.48161e-15	-0.156304	1.7408e-11	A	+	5	437586	AHRR	1
5:437667:A:G	eQTLcatalogue	Fairfax_2014_IFN24	ENSG00000063438	G	3.47823e-15	-0.156307	1.73911e-11	A	+	5	437667	AHRR	1
5:437862:C:G	eQTLcatalogue	Fairfax_2014_IFN24	ENSG00000063438	G	3.48273e-15	-0.156304	1.74137e-11	C	+	5	437862	AHRR	1
2:68385097:A:G	eQTLcatalogue	Fairfax_2014_LPS24	ENSG00000243667	A	2.50603e-06	-0.072081	0.0125301	G	+	2	68385097	WDR92	1
2:68385097:A:G	eQTLcatalogue	Fairfax_2014_LPS24	ENSG00000221823	A	7.78794e-20	0.164689	3.89397e-16	G	-	2	68385097	PPP3R1	1
2:68393144:A:T	eQTLcatalogue	Fairfax_2014_LPS24	ENSG00000243667	T	4.20389e-06	-0.0711708	0.0210194	A	+	2	68393144	WDR92	1
2:68393144:A:T	eQTLcatalogue	Fairfax_2014_LPS24	ENSG00000221823	T	9.38147e-22	0.173646	4.69073e-18	A	-	2	68393144	PPP3R1	1
2:68394184:C:T	eQTLcatalogue	Fairfax_2014_LPS24	ENSG00000243667	C	4.13331e-06	-0.0711769	0.0206665	T	+	2	68394184	WDR92	1
2:68394184:C:T	eQTLcatalogue	Fairfax_2014_LPS24	ENSG00000221823	C	8.55181e-22	0.173682	4.27591e-18	T	-	2	68394184	PPP3R1	1
2:68395631:A:G	eQTLcatalogue	Fairfax_2014_LPS24	ENSG00000243667	G	4.03941e-06	-0.0711793	0.020197	A	+	2	68395631	WDR92	1
2:68395631:A:G	eQTLcatalogue	Fairfax_2014_LPS24	ENSG00000221823	G	7.79485e-22	0.173663	3.89743e-18	A	-	2	68395631	PPP3R1	1
2:68398919:C:G	eQTLcatalogue	Fairfax_2014_LPS24	ENSG00000243667	G	4.05107e-06	-0.0711546	0.0202553	C	+	2	68398919	WDR92	1
2:68398919:C:G	eQTLcatalogue	Fairfax_2014_LPS24	ENSG00000221823	G	8.2939e-22	0.173525	4.14695e-18	C	-	2	68398919	PPP3R1	1
2:68399190:C:T	eQTLcatalogue	Fairfax_2014_LPS24	ENSG00000243667	C	3.87978e-06	-0.0711101	0.0193989	T	+	2	68399190	WDR92	1
2:68399190:C:T	eQTLcatalogue	Fairfax_2014_LPS24	ENSG00000221823	C	6.58875e-22	0.173459	3.29437e-18	T	-	2	68399190	PPP3R1	1
2:68402012:G:T	eQTLcatalogue	Fairfax_2014_LPS24	ENSG00000243667	G	3.79186e-06	-0.0709948	0.0189593	T	+	2	68402012	WDR92	1
2:68402012:G:T	eQTLcatalogue	Fairfax_2014_LPS24	ENSG00000221823	G	5.76461e-22	0.173219	2.88231e-18	T	-	2	68402012	PPP3R1	1
2:68402830:C:G	eQTLcatalogue	Fairfax_2014_LPS24	ENSG00000243667	G	3.79005e-06	-0.070998	0.0189502	C	+	2	68402830	WDR92	1
2:68402830:C:G	eQTLcatalogue	Fairfax_2014_LPS24	ENSG00000221823	G	5.77527e-22	0.17322	2.88763e-18	C	-	2	68402830	PPP3R1	1
2:68410372:A:C	eQTLcatalogue	Fairfax_2014_LPS24	ENSG00000243667	C	3.70003e-06	-0.0711735	0.0185002	A	+	2	68410372	WDR92	1
2:68410372:A:C	eQTLcatalogue	Fairfax_2014_LPS24	ENSG00000221823	C	5.46964e-22	0.173554	2.73482e-18	A	-	2	68410372	PPP3R1	1
2:68410660:G:T	eQTLcatalogue	Fairfax_2014_LPS24	ENSG00000243667	T	3.70276e-06	-0.0711727	0.0185138	G	+	2	68410660	WDR92	1
2:68410660:G:T	eQTLcatalogue	Fairfax_2014_LPS24	ENSG00000221823	T	5.43978e-22	0.173567	2.71989e-18	G	-	2	68410660	PPP3R1	1
2:68411414:A:G	eQTLcatalogue	Fairfax_2014_LPS24	ENSG00000243667	G	3.70503e-06	-0.071173	0.0185252	A	+	2	68411414	WDR92	1
2:68411414:A:G	eQTLcatalogue	Fairfax_2014_LPS24	ENSG00000221823	G	5.45134e-22	0.173569	2.72567e-18	A	-	2	68411414	PPP3R1	1
2:68418868:A:T	eQTLcatalogue	Fairfax_2014_LPS24	ENSG00000243667	A	3.6853e-06	-0.0712347	0.0184265	T	+	2	68418868	WDR92	1
2:68418868:A:T	eQTLcatalogue	Fairfax_2014_LPS24	ENSG00000221823	A	5.40676e-22	0.173692	2.70338e-18	T	-	2	68418868	PPP3R1	1
2:68419487:A:G	eQTLcatalogue	Fairfax_2014_LPS24	ENSG00000243667	G	3.68921e-06	-0.0712333	0.018446	A	+	2	68419487	WDR92	1
2:68419487:A:G	eQTLcatalogue	Fairfax_2014_LPS24	ENSG00000221823	G	5.39117e-22	0.173701	2.69559e-18	A	-	2	68419487	PPP3R1	1
2:68420070:G:T	eQTLcatalogue	Fairfax_2014_LPS24	ENSG00000243667	G	3.68617e-06	-0.0712368	0.0184308	T	+	2	68420070	WDR92	1
2:68420070:G:T	eQTLcatalogue	Fairfax_2014_LPS24	ENSG00000221823	G	5.38941e-22	0.173704	2.69471e-18	T	-	2	68420070	PPP3R1	1
2:68421049:A:G	eQTLcatalogue	Fairfax_2014_LPS24	ENSG00000243667	G	3.68761e-06	-0.0712354	0.018438	A	+	2	68421049	WDR92	1
2:68421049:A:G	eQTLcatalogue	Fairfax_2014_LPS24	ENSG00000221823	G	5.39597e-22	0.173702	2.69798e-18	A	-	2	68421049	PPP3R1	1
2:68422771:A:G	eQTLcatalogue	Fairfax_2014_LPS24	ENSG00000243667	G	3.68351e-06	-0.0712366	0.0184175	A	+	2	68422771	WDR92	1
2:68422771:A:G	eQTLcatalogue	Fairfax_2014_LPS24	ENSG00000221823	G	5.40651e-22	0.173693	2.70325e-18	A	-	2	68422771	PPP3R1	1
2:68423530:A:G	eQTLcatalogue	Fairfax_2014_LPS24	ENSG00000243667	G	3.68839e-06	-0.0712286	0.0184419	A	+	2	68423530	WDR92	1
2:68423530:A:G	eQTLcatalogue	Fairfax_2014_LPS24	ENSG00000221823	G	5.4075e-22	0.173683	2.70375e-18	A	-	2	68423530	PPP3R1	1
2:68430925:C:T	eQTLcatalogue	Fairfax_2014_LPS24	ENSG00000243667	C	3.74964e-06	-0.0710835	0.0187482	T	+	2	68430925	WDR92	1
2:68430925:C:T	eQTLcatalogue	Fairfax_2014_LPS24	ENSG00000221823	C	5.68832e-22	0.173372	2.84416e-18	T	-	2	68430925	PPP3R1	1
2:68431259:A:G	eQTLcatalogue	Fairfax_2014_LPS24	ENSG00000243667	G	3.75362e-06	-0.0710739	0.0187681	A	+	2	68431259	WDR92	1
2:68431259:A:G	eQTLcatalogue	Fairfax_2014_LPS24	ENSG00000221823	G	5.68952e-22	0.173357	2.84476e-18	A	-	2	68431259	PPP3R1	1
2:68433831:A:G	eQTLcatalogue	Fairfax_2014_LPS24	ENSG00000243667	G	3.7904e-06	-0.0709947	0.018952	A	+	2	68433831	WDR92	1
2:68433831:A:G	eQTLcatalogue	Fairfax_2014_LPS24	ENSG00000221823	G	5.76092e-22	0.173217	2.88046e-18	A	-	2	68433831	PPP3R1	1
2:68435431:C:G	eQTLcatalogue	Fairfax_2014_LPS24	ENSG00000243667	C	3.56954e-06	-0.0713998	0.0178477	G	+	2	68435431	WDR92	1
2:68435431:C:G	eQTLcatalogue	Fairfax_2014_LPS24	ENSG00000221823	C	4.76286e-22	0.174057	2.38143e-18	G	-	2	68435431	PPP3R1	1
2:68438614:C:T	eQTLcatalogue	Fairfax_2014_LPS24	ENSG00000243667	C	3.11323e-06	-0.0722028	0.0155661	T	+	2	68438614	WDR92	1
2:68438614:C:T	eQTLcatalogue	Fairfax_2014_LPS24	ENSG00000221823	C	3.34098e-22	0.175551	1.67049e-18	T	-	2	68438614	PPP3R1	1
2:68439960:C:T	eQTLcatalogue	Fairfax_2014_LPS24	ENSG00000243667	C	3.0585e-06	-0.0724898	0.0152925	T	+	2	68439960	WDR92	1
2:68439960:C:T	eQTLcatalogue	Fairfax_2014_LPS24	ENSG00000221823	C	3.43431e-22	0.176072	1.71716e-18	T	-	2	68439960	PPP3R1	1
2:68443651:A:G	eQTLcatalogue	Fairfax_2014_LPS24	ENSG00000243667	A	1.96874e-06	-0.0743472	0.0098437	G	+	2	68443651	WDR92	1
2:68443651:A:G	eQTLcatalogue	Fairfax_2014_LPS24	ENSG00000221823	A	3.49667e-22	0.177262	1.74834e-18	G	-	2	68443651	PPP3R1	1
2:68443835:A:T	eQTLcatalogue	Fairfax_2014_LPS24	ENSG00000243667	A	2.72081e-06	-0.0731893	0.013604	T	+	2	68443835	WDR92	1
2:68443835:A:T	eQTLcatalogue	Fairfax_2014_LPS24	ENSG00000221823	A	2.52734e-22	0.177384	1.26367e-18	T	-	2	68443835	PPP3R1	1
2:68446936:C:T	eQTLcatalogue	Fairfax_2014_LPS24	ENSG00000243667	C	2.43387e-06	-0.0736756	0.0121694	T	+	2	68446936	WDR92	1
2:68446936:C:T	eQTLcatalogue	Fairfax_2014_LPS24	ENSG00000221823	C	2.159e-22	0.177982	1.0795e-18	T	-	2	68446936	PPP3R1	1
2:68457573:C:T	eQTLcatalogue	Fairfax_2014_LPS24	ENSG00000243667	C	1.73233e-06	-0.0756018	0.00866165	T	+	2	68457573	WDR92	1
2:68457573:C:T	eQTLcatalogue	Fairfax_2014_LPS24	ENSG00000221823	C	7.33228e-23	0.181833	3.66614e-19	T	-	2	68457573	PPP3R1	1
2:68457854:A:G	eQTLcatalogue	Fairfax_2014_LPS24	ENSG00000243667	A	1.98936e-06	-0.0753145	0.0099468	G	+	2	68457854	WDR92	1
2:68457854:A:G	eQTLcatalogue	Fairfax_2014_LPS24	ENSG00000221823	A	7.03764e-23	0.182232	3.51882e-19	G	-	2	68457854	PPP3R1	1
2:68463612:A:G	eQTLcatalogue	Fairfax_2014_LPS24	ENSG00000243667	G	1.45765e-06	-0.0765214	0.00728825	A	+	2	68463612	WDR92	1
2:68463612:A:G	eQTLcatalogue	Fairfax_2014_LPS24	ENSG00000221823	G	4.89023e-23	0.183416	2.44511e-19	A	-	2	68463612	PPP3R1	1
2:68467910:A:C	eQTLcatalogue	Fairfax_2014_LPS24	ENSG00000243667	A	1.36333e-06	-0.0768492	0.00681665	C	+	2	68467910	WDR92	1
2:68467910:A:C	eQTLcatalogue	Fairfax_2014_LPS24	ENSG00000221823	A	4.19297e-23	0.183957	2.09648e-19	C	-	2	68467910	PPP3R1	1
2:68475595:A:C	eQTLcatalogue	Fairfax_2014_LPS24	ENSG00000243667	C	1.16501e-06	-0.0775585	0.00582505	A	+	2	68475595	WDR92	1
2:68475595:A:C	eQTLcatalogue	Fairfax_2014_LPS24	ENSG00000221823	C	3.06084e-23	0.185006	1.53042e-19	A	-	2	68475595	PPP3R1	1
2:68477248:C:T	eQTLcatalogue	Fairfax_2014_LPS24	ENSG00000243667	T	1.10933e-06	-0.0780168	0.00554665	C	+	2	68477248	WDR92	1
2:68477248:C:T	eQTLcatalogue	Fairfax_2014_LPS24	ENSG00000221823	T	2.92128e-23	0.185817	1.46064e-19	C	-	2	68477248	PPP3R1	1
2:68478919:A:G	eQTLcatalogue	Fairfax_2014_LPS24	ENSG00000243667	A	1.39367e-06	-0.0776805	0.00696835	G	+	2	68478919	WDR92	1
2:68478919:A:G	eQTLcatalogue	Fairfax_2014_LPS24	ENSG00000221823	A	1.21864e-22	0.184379	6.0932e-19	G	-	2	68478919	PPP3R1	1
5:416118:A:G	eQTLcatalogue	Fairfax_2014_LPS24	ENSG00000063438	G	2.69416e-11	-0.162692	1.34708e-07	A	+	5	416118	AHRR	1
5:416672:A:G	eQTLcatalogue	Fairfax_2014_LPS24	ENSG00000063438	G	2.41286e-11	-0.163004	1.20643e-07	A	+	5	416672	AHRR	1
5:418093:A:G	eQTLcatalogue	Fairfax_2014_LPS24	ENSG00000063438	A	2.14686e-08	-0.186569	0.000107343	G	+	5	418093	AHRR	1
5:418494:A:G	eQTLcatalogue	Fairfax_2014_LPS24	ENSG00000063438	A	1.78337e-11	-0.163624	8.91685e-08	G	+	5	418494	AHRR	1
5:421193:C:G	eQTLcatalogue	Fairfax_2014_LPS24	ENSG00000063438	G	4.18196e-10	-0.152366	2.09098e-06	C	+	5	421193	AHRR	1
5:421403:A:G	eQTLcatalogue	Fairfax_2014_LPS24	ENSG00000063438	G	1.81505e-11	-0.16453	9.07525e-08	A	+	5	421403	AHRR	1
5:421426:A:C	eQTLcatalogue	Fairfax_2014_LPS24	ENSG00000063438	A	1.9553e-08	-0.190706	9.7765e-05	C	+	5	421426	AHRR	1
5:421455:G:T	eQTLcatalogue	Fairfax_2014_LPS24	ENSG00000063438	G	1.26852e-11	-0.16398	6.3426e-08	T	+	5	421455	AHRR	1
5:422178:A:G	eQTLcatalogue	Fairfax_2014_LPS24	ENSG00000063438	G	4.51966e-15	-0.179734	2.25983e-11	A	+	5	422178	AHRR	1
5:423169:C:T	eQTLcatalogue	Fairfax_2014_LPS24	ENSG00000063438	C	4.24061e-15	-0.179418	2.12031e-11	T	+	5	423169	AHRR	1
5:423595:C:T	eQTLcatalogue	Fairfax_2014_LPS24	ENSG00000063438	C	4.13421e-15	-0.179434	2.06711e-11	T	+	5	423595	AHRR	1
5:423671:C:T	eQTLcatalogue	Fairfax_2014_LPS24	ENSG00000063438	C	4.09628e-15	-0.179445	2.04814e-11	T	+	5	423671	AHRR	1
5:423906:A:G	eQTLcatalogue	Fairfax_2014_LPS24	ENSG00000063438	G	4.06227e-15	-0.179456	2.03114e-11	A	+	5	423906	AHRR	1
5:428236:A:C	eQTLcatalogue	Fairfax_2014_LPS24	ENSG00000063438	C	3.53055e-15	-0.178887	1.76527e-11	A	+	5	428236	AHRR	1
5:429124:C:G	eQTLcatalogue	Fairfax_2014_LPS24	ENSG00000063438	C	2.90529e-15	-0.179419	1.45264e-11	G	+	5	429124	AHRR	1
5:429818:C:G	eQTLcatalogue	Fairfax_2014_LPS24	ENSG00000063438	C	2.33808e-15	-0.179974	1.16904e-11	G	+	5	429818	AHRR	1
5:430059:A:G	eQTLcatalogue	Fairfax_2014_LPS24	ENSG00000063438	G	2.27431e-15	-0.180037	1.13715e-11	A	+	5	430059	AHRR	1
5:430217:C:T	eQTLcatalogue	Fairfax_2014_LPS24	ENSG00000063438	C	3.48695e-09	-0.133113	1.74347e-05	T	+	5	430217	AHRR	1
5:434722:C:G	eQTLcatalogue	Fairfax_2014_LPS24	ENSG00000063438	G	1.56074e-15	-0.179735	7.8037e-12	C	+	5	434722	AHRR	1
5:436981:A:G	eQTLcatalogue	Fairfax_2014_LPS24	ENSG00000063438	A	3.69476e-15	-0.18382	1.84738e-11	G	+	5	436981	AHRR	1
5:437542:C:T	eQTLcatalogue	Fairfax_2014_LPS24	ENSG00000063438	T	1.45971e-15	-0.180904	7.29855e-12	C	+	5	437542	AHRR	1
5:437586:A:G	eQTLcatalogue	Fairfax_2014_LPS24	ENSG00000063438	G	1.46076e-15	-0.180902	7.3038e-12	A	+	5	437586	AHRR	1
5:437667:A:G	eQTLcatalogue	Fairfax_2014_LPS24	ENSG00000063438	G	1.46184e-15	-0.180901	7.3092e-12	A	+	5	437667	AHRR	1
5:437862:C:G	eQTLcatalogue	Fairfax_2014_LPS24	ENSG00000063438	G	1.46943e-15	-0.180889	7.34715e-12	C	+	5	437862	AHRR	1
5:416118:A:G	eQTLcatalogue	Fairfax_2014_LPS2	ENSG00000063438	G	8.22831e-06	-0.0964479	0.0411415	A	+	5	416118	AHRR	1
5:416672:A:G	eQTLcatalogue	Fairfax_2014_LPS2	ENSG00000063438	G	8.15702e-06	-0.0965845	0.0407851	A	+	5	416672	AHRR	1
5:418494:A:G	eQTLcatalogue	Fairfax_2014_LPS2	ENSG00000063438	A	8.0708e-06	-0.0966181	0.040354	G	+	5	418494	AHRR	1
5:421193:C:G	eQTLcatalogue	Fairfax_2014_LPS2	ENSG00000063438	G	8.99137e-06	-0.0951703	0.0449568	C	+	5	421193	AHRR	1
5:421455:G:T	eQTLcatalogue	Fairfax_2014_LPS2	ENSG00000063438	G	8.61882e-06	-0.0964587	0.0430941	T	+	5	421455	AHRR	1
5:422178:A:G	eQTLcatalogue	Fairfax_2014_LPS2	ENSG00000063438	G	1.36889e-07	-0.107427	0.000684445	A	+	5	422178	AHRR	1
5:423169:C:T	eQTLcatalogue	Fairfax_2014_LPS2	ENSG00000063438	C	1.43466e-07	-0.107062	0.00071733	T	+	5	423169	AHRR	1
5:423595:C:T	eQTLcatalogue	Fairfax_2014_LPS2	ENSG00000063438	C	1.41707e-07	-0.107084	0.000708535	T	+	5	423595	AHRR	1
5:423671:C:T	eQTLcatalogue	Fairfax_2014_LPS2	ENSG00000063438	C	1.41096e-07	-0.107094	0.00070548	T	+	5	423671	AHRR	1
5:423906:A:G	eQTLcatalogue	Fairfax_2014_LPS2	ENSG00000063438	G	1.40604e-07	-0.107101	0.00070302	A	+	5	423906	AHRR	1
5:428236:A:C	eQTLcatalogue	Fairfax_2014_LPS2	ENSG00000063438	C	1.2043e-07	-0.107141	0.00060215	A	+	5	428236	AHRR	1
5:429124:C:G	eQTLcatalogue	Fairfax_2014_LPS2	ENSG00000063438	C	1.1715e-07	-0.107266	0.00058575	G	+	5	429124	AHRR	1
5:429818:C:G	eQTLcatalogue	Fairfax_2014_LPS2	ENSG00000063438	C	1.1459e-07	-0.107345	0.00057295	G	+	5	429818	AHRR	1
5:430059:A:G	eQTLcatalogue	Fairfax_2014_LPS2	ENSG00000063438	G	1.1437e-07	-0.107347	0.00057185	A	+	5	430059	AHRR	1
5:434722:C:G	eQTLcatalogue	Fairfax_2014_LPS2	ENSG00000063438	G	9.58153e-08	-0.107122	0.000479076	C	+	5	434722	AHRR	1
5:436981:A:G	eQTLcatalogue	Fairfax_2014_LPS2	ENSG00000063438	A	6.32589e-06	-0.0943452	0.0316295	G	+	5	436981	AHRR	1
5:437542:C:T	eQTLcatalogue	Fairfax_2014_LPS2	ENSG00000063438	T	1.19021e-07	-0.107003	0.000595105	C	+	5	437542	AHRR	1
5:437586:A:G	eQTLcatalogue	Fairfax_2014_LPS2	ENSG00000063438	G	1.19102e-07	-0.107001	0.00059551	A	+	5	437586	AHRR	1
5:437667:A:G	eQTLcatalogue	Fairfax_2014_LPS2	ENSG00000063438	G	1.19214e-07	-0.106998	0.00059607	A	+	5	437667	AHRR	1
5:437862:C:G	eQTLcatalogue	Fairfax_2014_LPS2	ENSG00000063438	G	1.19688e-07	-0.106986	0.00059844	C	+	5	437862	AHRR	1
2:68385097:A:G	eQTLcatalogue	Fairfax_2014_naive	ENSG00000243667	A	7.52256e-09	-0.0629652	3.76128e-05	G	+	2	68385097	WDR92	1
2:68385097:A:G	eQTLcatalogue	Fairfax_2014_naive	ENSG00000221823	A	7.86972e-28	0.152095	3.93486e-24	G	-	2	68385097	PPP3R1	1
2:68393144:A:T	eQTLcatalogue	Fairfax_2014_naive	ENSG00000243667	T	1.15616e-08	-0.0625303	5.7808e-05	A	+	2	68393144	WDR92	1
2:68393144:A:T	eQTLcatalogue	Fairfax_2014_naive	ENSG00000221823	T	3.82185e-31	0.1609	1.91092e-27	A	-	2	68393144	PPP3R1	1
2:68394184:C:T	eQTLcatalogue	Fairfax_2014_naive	ENSG00000243667	C	1.19202e-08	-0.0624326	5.9601e-05	T	+	2	68394184	WDR92	1
2:68394184:C:T	eQTLcatalogue	Fairfax_2014_naive	ENSG00000221823	C	3.65904e-31	0.160834	1.82952e-27	T	-	2	68394184	PPP3R1	1
2:68395631:A:G	eQTLcatalogue	Fairfax_2014_naive	ENSG00000243667	G	1.23106e-08	-0.0623141	6.1553e-05	A	+	2	68395631	WDR92	1
2:68395631:A:G	eQTLcatalogue	Fairfax_2014_naive	ENSG00000221823	G	3.55537e-31	0.160706	1.77768e-27	A	-	2	68395631	PPP3R1	1
2:68398919:C:G	eQTLcatalogue	Fairfax_2014_naive	ENSG00000243667	G	1.27385e-08	-0.0622331	6.36925e-05	C	+	2	68398919	WDR92	1
2:68398919:C:G	eQTLcatalogue	Fairfax_2014_naive	ENSG00000221823	G	3.16219e-31	0.160773	1.58109e-27	C	-	2	68398919	PPP3R1	1
2:68399190:C:T	eQTLcatalogue	Fairfax_2014_naive	ENSG00000243667	C	1.3211e-08	-0.0620244	6.6055e-05	T	+	2	68399190	WDR92	1
2:68399190:C:T	eQTLcatalogue	Fairfax_2014_naive	ENSG00000221823	C	3.49317e-31	0.160303	1.74658e-27	T	-	2	68399190	PPP3R1	1
2:68402012:G:T	eQTLcatalogue	Fairfax_2014_naive	ENSG00000243667	G	1.43938e-08	-0.0617171	7.1969e-05	T	+	2	68402012	WDR92	1
2:68402012:G:T	eQTLcatalogue	Fairfax_2014_naive	ENSG00000221823	G	3.48174e-31	0.159909	1.74087e-27	T	-	2	68402012	PPP3R1	1
2:68402830:C:G	eQTLcatalogue	Fairfax_2014_naive	ENSG00000243667	G	1.43979e-08	-0.061718	7.19895e-05	C	+	2	68402830	WDR92	1
2:68402830:C:G	eQTLcatalogue	Fairfax_2014_naive	ENSG00000221823	G	3.4825e-31	0.159913	1.74125e-27	C	-	2	68402830	PPP3R1	1
2:68410372:A:C	eQTLcatalogue	Fairfax_2014_naive	ENSG00000243667	C	1.46787e-08	-0.0617863	7.33935e-05	A	+	2	68410372	WDR92	1
2:68410372:A:C	eQTLcatalogue	Fairfax_2014_naive	ENSG00000221823	C	3.46062e-31	0.160186	1.73031e-27	A	-	2	68410372	PPP3R1	1
2:68410660:G:T	eQTLcatalogue	Fairfax_2014_naive	ENSG00000243667	T	1.47053e-08	-0.0617849	7.35265e-05	G	+	2	68410660	WDR92	1
2:68410660:G:T	eQTLcatalogue	Fairfax_2014_naive	ENSG00000221823	T	3.44824e-31	0.160194	1.72412e-27	G	-	2	68410660	PPP3R1	1
2:68411414:A:G	eQTLcatalogue	Fairfax_2014_naive	ENSG00000243667	G	1.46898e-08	-0.0617885	7.3449e-05	A	+	2	68411414	WDR92	1
2:68411414:A:G	eQTLcatalogue	Fairfax_2014_naive	ENSG00000221823	G	3.4521e-31	0.160198	1.72605e-27	A	-	2	68411414	PPP3R1	1
2:68418868:A:T	eQTLcatalogue	Fairfax_2014_naive	ENSG00000243667	A	1.46293e-08	-0.0618325	7.31465e-05	T	+	2	68418868	WDR92	1
2:68418868:A:T	eQTLcatalogue	Fairfax_2014_naive	ENSG00000221823	A	3.41144e-31	0.160304	1.70572e-27	T	-	2	68418868	PPP3R1	1
2:68419487:A:G	eQTLcatalogue	Fairfax_2014_naive	ENSG00000243667	G	1.46307e-08	-0.0618329	7.31535e-05	A	+	2	68419487	WDR92	1
2:68419487:A:G	eQTLcatalogue	Fairfax_2014_naive	ENSG00000221823	G	3.41983e-31	0.160303	1.70992e-27	A	-	2	68419487	PPP3R1	1
2:68420070:G:T	eQTLcatalogue	Fairfax_2014_naive	ENSG00000243667	G	1.46247e-08	-0.061834	7.31235e-05	T	+	2	68420070	WDR92	1
2:68420070:G:T	eQTLcatalogue	Fairfax_2014_naive	ENSG00000221823	G	3.40418e-31	0.160309	1.70209e-27	T	-	2	68420070	PPP3R1	1
2:68421049:A:G	eQTLcatalogue	Fairfax_2014_naive	ENSG00000243667	G	1.4604e-08	-0.0618361	7.302e-05	A	+	2	68421049	WDR92	1
2:68421049:A:G	eQTLcatalogue	Fairfax_2014_naive	ENSG00000221823	G	3.41247e-31	0.160305	1.70623e-27	A	-	2	68421049	PPP3R1	1
2:68422771:A:G	eQTLcatalogue	Fairfax_2014_naive	ENSG00000243667	G	1.45891e-08	-0.0618356	7.29455e-05	A	+	2	68422771	WDR92	1
2:68422771:A:G	eQTLcatalogue	Fairfax_2014_naive	ENSG00000221823	G	3.39414e-31	0.160305	1.69707e-27	A	-	2	68422771	PPP3R1	1
2:68423530:A:G	eQTLcatalogue	Fairfax_2014_naive	ENSG00000243667	G	1.45681e-08	-0.061835	7.28405e-05	A	+	2	68423530	WDR92	1
2:68423530:A:G	eQTLcatalogue	Fairfax_2014_naive	ENSG00000221823	G	3.4017e-31	0.160294	1.70085e-27	A	-	2	68423530	PPP3R1	1
2:68430925:C:T	eQTLcatalogue	Fairfax_2014_naive	ENSG00000243667	C	1.44065e-08	-0.0617633	7.20325e-05	T	+	2	68430925	WDR92	1
2:68430925:C:T	eQTLcatalogue	Fairfax_2014_naive	ENSG00000221823	C	3.46076e-31	0.160039	1.73038e-27	T	-	2	68430925	PPP3R1	1
2:68431259:A:G	eQTLcatalogue	Fairfax_2014_naive	ENSG00000243667	G	1.44071e-08	-0.0617587	7.20355e-05	A	+	2	68431259	WDR92	1
2:68431259:A:G	eQTLcatalogue	Fairfax_2014_naive	ENSG00000221823	G	3.44401e-31	0.160032	1.722e-27	A	-	2	68431259	PPP3R1	1
2:68433831:A:G	eQTLcatalogue	Fairfax_2014_naive	ENSG00000243667	G	1.44044e-08	-0.0617146	7.2022e-05	A	+	2	68433831	WDR92	1
2:68433831:A:G	eQTLcatalogue	Fairfax_2014_naive	ENSG00000221823	G	3.48277e-31	0.159906	1.74138e-27	A	-	2	68433831	PPP3R1	1
2:68435431:C:G	eQTLcatalogue	Fairfax_2014_naive	ENSG00000243667	C	1.42103e-08	-0.0619251	7.10515e-05	G	+	2	68435431	WDR92	1
2:68435431:C:G	eQTLcatalogue	Fairfax_2014_naive	ENSG00000221823	C	3.79337e-31	0.160302	1.89669e-27	G	-	2	68435431	PPP3R1	1
2:68438614:C:T	eQTLcatalogue	Fairfax_2014_naive	ENSG00000243667	C	1.49612e-08	-0.0621298	7.4806e-05	T	+	2	68438614	WDR92	1
2:68438614:C:T	eQTLcatalogue	Fairfax_2014_naive	ENSG00000221823	C	4.60072e-31	0.160879	2.30036e-27	T	-	2	68438614	PPP3R1	1
2:68439960:C:T	eQTLcatalogue	Fairfax_2014_naive	ENSG00000243667	C	1.46289e-08	-0.0623811	7.31445e-05	T	+	2	68439960	WDR92	1
2:68439960:C:T	eQTLcatalogue	Fairfax_2014_naive	ENSG00000221823	C	9.3229e-31	0.160707	4.66145e-27	T	-	2	68439960	PPP3R1	1
2:68443651:A:G	eQTLcatalogue	Fairfax_2014_naive	ENSG00000243667	A	1.41184e-08	-0.0628248	7.0592e-05	G	+	2	68443651	WDR92	1
2:68443651:A:G	eQTLcatalogue	Fairfax_2014_naive	ENSG00000221823	A	1.33651e-30	0.161313	6.68255e-27	G	-	2	68443651	PPP3R1	1
2:68443835:A:T	eQTLcatalogue	Fairfax_2014_naive	ENSG00000243667	A	1.51068e-08	-0.0625918	7.5534e-05	T	+	2	68443835	WDR92	1
2:68443835:A:T	eQTLcatalogue	Fairfax_2014_naive	ENSG00000221823	A	1.18605e-30	0.161154	5.93025e-27	T	-	2	68443835	PPP3R1	1
2:68446936:C:T	eQTLcatalogue	Fairfax_2014_naive	ENSG00000243667	C	1.60573e-08	-0.0625735	8.02865e-05	T	+	2	68446936	WDR92	1
2:68446936:C:T	eQTLcatalogue	Fairfax_2014_naive	ENSG00000221823	C	8.5556e-31	0.16173	4.2778e-27	T	-	2	68446936	PPP3R1	1
2:68457573:C:T	eQTLcatalogue	Fairfax_2014_naive	ENSG00000243667	C	1.96722e-08	-0.0628527	9.8361e-05	T	+	2	68457573	WDR92	1
2:68457573:C:T	eQTLcatalogue	Fairfax_2014_naive	ENSG00000221823	C	2.22266e-30	0.162433	1.11133e-26	T	-	2	68457573	PPP3R1	1
2:68457854:A:G	eQTLcatalogue	Fairfax_2014_naive	ENSG00000243667	A	1.45218e-08	-0.063509	7.2609e-05	G	+	2	68457854	WDR92	1
2:68457854:A:G	eQTLcatalogue	Fairfax_2014_naive	ENSG00000221823	A	1.54657e-30	0.163051	7.73285e-27	G	-	2	68457854	PPP3R1	1
2:68463612:A:G	eQTLcatalogue	Fairfax_2014_naive	ENSG00000243667	G	2.29633e-08	-0.0628438	0.000114816	A	+	2	68463612	WDR92	1
2:68463612:A:G	eQTLcatalogue	Fairfax_2014_naive	ENSG00000221823	G	4.82054e-30	0.162343	2.41027e-26	A	-	2	68463612	PPP3R1	1
2:68467910:A:C	eQTLcatalogue	Fairfax_2014_naive	ENSG00000243667	A	2.48306e-08	-0.062781	0.000124153	C	+	2	68467910	WDR92	1
2:68467910:A:C	eQTLcatalogue	Fairfax_2014_naive	ENSG00000221823	A	7.11658e-30	0.162148	3.55829e-26	C	-	2	68467910	PPP3R1	1
2:68475595:A:C	eQTLcatalogue	Fairfax_2014_naive	ENSG00000243667	C	3.14498e-08	-0.0624771	0.000157249	A	+	2	68475595	WDR92	1
2:68475595:A:C	eQTLcatalogue	Fairfax_2014_naive	ENSG00000221823	C	2.01297e-29	0.161405	1.00648e-25	A	-	2	68475595	PPP3R1	1
2:68477248:C:T	eQTLcatalogue	Fairfax_2014_naive	ENSG00000243667	T	2.85132e-08	-0.0629733	0.000142566	C	+	2	68477248	WDR92	1
2:68477248:C:T	eQTLcatalogue	Fairfax_2014_naive	ENSG00000221823	T	2.68642e-29	0.161888	1.34321e-25	C	-	2	68477248	PPP3R1	1
2:68478919:A:G	eQTLcatalogue	Fairfax_2014_naive	ENSG00000243667	A	6.75069e-08	-0.0614498	0.000337534	G	+	2	68478919	WDR92	1
2:68478919:A:G	eQTLcatalogue	Fairfax_2014_naive	ENSG00000221823	A	1.11001e-28	0.160717	5.55005e-25	G	-	2	68478919	PPP3R1	1
5:416118:A:G	eQTLcatalogue	Fairfax_2014_naive	ENSG00000180104	G	5.59769e-24	-0.107358	2.79885e-20	A	+	5	416118	EXOC3	1
5:416672:A:G	eQTLcatalogue	Fairfax_2014_naive	ENSG00000180104	G	4.2426e-24	-0.107615	2.1213e-20	A	+	5	416672	EXOC3	1
5:418093:A:G	eQTLcatalogue	Fairfax_2014_naive	ENSG00000180104	A	1.14935e-14	-0.114516	5.74675e-11	G	+	5	418093	EXOC3	1
5:418494:A:G	eQTLcatalogue	Fairfax_2014_naive	ENSG00000180104	A	1.66057e-24	-0.1083	8.30285e-21	G	+	5	418494	EXOC3	1
5:421193:C:G	eQTLcatalogue	Fairfax_2014_naive	ENSG00000180104	G	2.2214e-21	-0.102144	1.1107e-17	C	+	5	421193	EXOC3	1
5:421403:A:G	eQTLcatalogue	Fairfax_2014_naive	ENSG00000180104	G	7.87126e-24	-0.107296	3.93563e-20	A	+	5	421403	EXOC3	1
5:421426:A:C	eQTLcatalogue	Fairfax_2014_naive	ENSG00000180104	A	2.14387e-14	-0.115576	1.07193e-10	C	+	5	421426	EXOC3	1
5:421455:G:T	eQTLcatalogue	Fairfax_2014_naive	ENSG00000180104	G	7.41838e-25	-0.10857	3.70919e-21	T	+	5	421455	EXOC3	1
5:422178:A:G	eQTLcatalogue	Fairfax_2014_naive	ENSG00000180104	G	1.62795e-38	-0.12744	8.13975e-35	A	+	5	422178	EXOC3	1
5:423169:C:T	eQTLcatalogue	Fairfax_2014_naive	ENSG00000180104	C	1.69125e-38	-0.127103	8.45625e-35	T	+	5	423169	EXOC3	1
5:423595:C:T	eQTLcatalogue	Fairfax_2014_naive	ENSG00000180104	C	1.6115e-38	-0.127114	8.0575e-35	T	+	5	423595	EXOC3	1
5:423671:C:T	eQTLcatalogue	Fairfax_2014_naive	ENSG00000180104	C	1.58267e-38	-0.127122	7.91335e-35	T	+	5	423671	EXOC3	1
5:423906:A:G	eQTLcatalogue	Fairfax_2014_naive	ENSG00000180104	G	1.55708e-38	-0.127128	7.7854e-35	A	+	5	423906	EXOC3	1
5:428236:A:C	eQTLcatalogue	Fairfax_2014_naive	ENSG00000180104	C	7.37154e-39	-0.127079	3.68577e-35	A	+	5	428236	EXOC3	1
5:429124:C:G	eQTLcatalogue	Fairfax_2014_naive	ENSG00000180104	C	8.26829e-39	-0.127021	4.13414e-35	G	+	5	429124	EXOC3	1
5:429818:C:G	eQTLcatalogue	Fairfax_2014_naive	ENSG00000180104	C	9.80302e-39	-0.126912	4.90151e-35	G	+	5	429818	EXOC3	1
5:430059:A:G	eQTLcatalogue	Fairfax_2014_naive	ENSG00000180104	G	1.0045e-38	-0.126893	5.0225e-35	A	+	5	430059	EXOC3	1
5:430217:C:T	eQTLcatalogue	Fairfax_2014_naive	ENSG00000180104	C	1.02621e-28	-0.10883	5.13105e-25	T	+	5	430217	EXOC3	1
5:434722:C:G	eQTLcatalogue	Fairfax_2014_naive	ENSG00000180104	G	2.37889e-37	-0.124324	1.18944e-33	C	+	5	434722	EXOC3	1
5:436981:A:G	eQTLcatalogue	Fairfax_2014_naive	ENSG00000180104	A	8.31202e-36	-0.127122	4.15601e-32	G	+	5	436981	EXOC3	1
5:437542:C:T	eQTLcatalogue	Fairfax_2014_naive	ENSG00000180104	T	2.03873e-38	-0.126306	1.01937e-34	C	+	5	437542	EXOC3	1
5:437586:A:G	eQTLcatalogue	Fairfax_2014_naive	ENSG00000180104	G	2.03507e-38	-0.126308	1.01754e-34	A	+	5	437586	EXOC3	1
5:437667:A:G	eQTLcatalogue	Fairfax_2014_naive	ENSG00000180104	G	2.03083e-38	-0.12631	1.01541e-34	A	+	5	437667	EXOC3	1
5:437862:C:G	eQTLcatalogue	Fairfax_2014_naive	ENSG00000180104	G	2.02113e-38	-0.126313	1.01056e-34	C	+	5	437862	EXOC3	1
2:68385097:A:G	eQTLcatalogue	GENCORD_ge_fibroblast	ENSG00000221823	A	2.30606e-06	-0.0753023	0.0115303	G	+	2	68385097	PPP3R1	1
2:68393144:A:T	eQTLcatalogue	GENCORD_ge_fibroblast	ENSG00000221823	T	1.09425e-06	-0.0786071	0.00547125	A	+	2	68393144	PPP3R1	1
2:68394184:C:T	eQTLcatalogue	GENCORD_ge_fibroblast	ENSG00000221823	C	6.226e-07	-0.0796367	0.003113	T	+	2	68394184	PPP3R1	1
2:68395631:A:G	eQTLcatalogue	GENCORD_ge_fibroblast	ENSG00000221823	G	1.11425e-06	-0.0784877	0.00557125	A	+	2	68395631	PPP3R1	1
2:68398919:C:G	eQTLcatalogue	GENCORD_ge_fibroblast	ENSG00000221823	G	1.405e-06	-0.0771267	0.007025	C	+	2	68398919	PPP3R1	1
2:68399190:C:T	eQTLcatalogue	GENCORD_ge_fibroblast	ENSG00000221823	C	1.40322e-06	-0.0770974	0.0070161	T	+	2	68399190	PPP3R1	1
2:68402012:G:T	eQTLcatalogue	GENCORD_ge_fibroblast	ENSG00000221823	G	1.40484e-06	-0.0770683	0.0070242	T	+	2	68402012	PPP3R1	1
2:68402830:C:G	eQTLcatalogue	GENCORD_ge_fibroblast	ENSG00000221823	G	1.41952e-06	-0.0770896	0.0070976	C	+	2	68402830	PPP3R1	1
2:68410372:A:C	eQTLcatalogue	GENCORD_ge_fibroblast	ENSG00000221823	C	1.71831e-06	-0.0765963	0.00859155	A	+	2	68410372	PPP3R1	1
2:68410660:G:T	eQTLcatalogue	GENCORD_ge_fibroblast	ENSG00000221823	T	1.70994e-06	-0.0766146	0.0085497	G	+	2	68410660	PPP3R1	1
2:68411414:A:G	eQTLcatalogue	GENCORD_ge_fibroblast	ENSG00000221823	G	1.71113e-06	-0.076612	0.00855565	A	+	2	68411414	PPP3R1	1
2:68418868:A:T	eQTLcatalogue	GENCORD_ge_fibroblast	ENSG00000221823	A	1.39775e-06	-0.0771472	0.00698875	T	+	2	68418868	PPP3R1	1
2:68419487:A:G	eQTLcatalogue	GENCORD_ge_fibroblast	ENSG00000221823	G	1.39809e-06	-0.0771545	0.00699045	A	+	2	68419487	PPP3R1	1
2:68420070:G:T	eQTLcatalogue	GENCORD_ge_fibroblast	ENSG00000221823	G	1.39789e-06	-0.077158	0.00698945	T	+	2	68420070	PPP3R1	1
2:68421049:A:G	eQTLcatalogue	GENCORD_ge_fibroblast	ENSG00000221823	G	1.39686e-06	-0.0771664	0.0069843	A	+	2	68421049	PPP3R1	1
2:68422771:A:G	eQTLcatalogue	GENCORD_ge_fibroblast	ENSG00000221823	G	1.39595e-06	-0.0771695	0.00697975	A	+	2	68422771	PPP3R1	1
2:68423530:A:G	eQTLcatalogue	GENCORD_ge_fibroblast	ENSG00000221823	G	1.39405e-06	-0.0771771	0.00697025	A	+	2	68423530	PPP3R1	1
2:68430925:C:T	eQTLcatalogue	GENCORD_ge_fibroblast	ENSG00000221823	C	1.40106e-06	-0.0771222	0.0070053	T	+	2	68430925	PPP3R1	1
2:68431259:A:G	eQTLcatalogue	GENCORD_ge_fibroblast	ENSG00000221823	G	1.40014e-06	-0.0771197	0.0070007	A	+	2	68431259	PPP3R1	1
2:68433831:A:G	eQTLcatalogue	GENCORD_ge_fibroblast	ENSG00000221823	G	1.40484e-06	-0.0770683	0.0070242	A	+	2	68433831	PPP3R1	1
2:68435431:C:G	eQTLcatalogue	GENCORD_ge_fibroblast	ENSG00000221823	C	1.37304e-06	-0.0772287	0.0068652	G	+	2	68435431	PPP3R1	1
2:68438614:C:T	eQTLcatalogue	GENCORD_ge_fibroblast	ENSG00000221823	C	1.25769e-06	-0.0776274	0.00628845	T	+	2	68438614	PPP3R1	1
2:68439960:C:T	eQTLcatalogue	GENCORD_ge_fibroblast	ENSG00000221823	C	1.22753e-06	-0.0777481	0.00613765	T	+	2	68439960	PPP3R1	1
2:68443651:A:G	eQTLcatalogue	GENCORD_ge_fibroblast	ENSG00000221823	A	1.14255e-06	-0.0781007	0.00571275	G	+	2	68443651	PPP3R1	1
2:68443835:A:T	eQTLcatalogue	GENCORD_ge_fibroblast	ENSG00000221823	A	1.1468e-06	-0.0780571	0.005734	T	+	2	68443835	PPP3R1	1
2:68446936:C:T	eQTLcatalogue	GENCORD_ge_fibroblast	ENSG00000221823	C	1.07357e-06	-0.0783415	0.00536785	T	+	2	68446936	PPP3R1	1
2:68457573:C:T	eQTLcatalogue	GENCORD_ge_fibroblast	ENSG00000221823	C	9.02089e-07	-0.0790464	0.00451045	T	+	2	68457573	PPP3R1	1
2:68457854:A:G	eQTLcatalogue	GENCORD_ge_fibroblast	ENSG00000221823	A	9.01841e-07	-0.0790543	0.0045092	G	+	2	68457854	PPP3R1	1
2:68463612:A:G	eQTLcatalogue	GENCORD_ge_fibroblast	ENSG00000221823	G	7.33854e-07	-0.0797224	0.00366927	A	+	2	68463612	PPP3R1	1
2:68467910:A:C	eQTLcatalogue	GENCORD_ge_fibroblast	ENSG00000221823	A	9.14637e-07	-0.0791885	0.00457319	C	+	2	68467910	PPP3R1	1
2:68475595:A:C	eQTLcatalogue	GENCORD_ge_fibroblast	ENSG00000221823	C	8.58747e-07	-0.0793917	0.00429373	A	+	2	68475595	PPP3R1	1
2:68477248:C:T	eQTLcatalogue	GENCORD_ge_fibroblast	ENSG00000221823	T	8.52392e-07	-0.0797243	0.00426196	C	+	2	68477248	PPP3R1	1
2:68478919:A:G	eQTLcatalogue	GENCORD_ge_fibroblast	ENSG00000221823	A	5.73604e-07	-0.0808395	0.00286802	G	+	2	68478919	PPP3R1	1
5:418093:A:G	eQTLcatalogue	GENCORD_ge_fibroblast	ENSG00000225138	A	3.34536e-08	-0.549775	0.000167268	G	+	5	418093	CTD-2228K2.7	1
5:421426:A:C	eQTLcatalogue	GENCORD_ge_fibroblast	ENSG00000225138	A	2.99765e-08	-0.557775	0.000149883	C	+	5	421426	CTD-2228K2.7	1
5:416118:A:G	eQTLcatalogue	GENCORD_ge_LCL	ENSG00000066230	G	9.87995e-07	0.217061	0.00493998	A	-	5	416118	SLC9A3	1
5:416118:A:G	eQTLcatalogue	GENCORD_ge_LCL	ENSG00000225138	G	2.3795e-08	0.397391	0.000118975	A	-	5	416118	CTD-2228K2.7	1
5:416672:A:G	eQTLcatalogue	GENCORD_ge_LCL	ENSG00000066230	G	6.47756e-07	0.221042	0.00323878	A	-	5	416672	SLC9A3	1
5:416672:A:G	eQTLcatalogue	GENCORD_ge_LCL	ENSG00000225138	G	1.52558e-08	0.403431	7.6279e-05	A	-	5	416672	CTD-2228K2.7	1
5:418494:A:G	eQTLcatalogue	GENCORD_ge_LCL	ENSG00000066230	A	3.28139e-07	0.226701	0.00164069	G	-	5	418494	SLC9A3	1
5:418494:A:G	eQTLcatalogue	GENCORD_ge_LCL	ENSG00000225138	A	7.60296e-09	0.411634	3.80148e-05	G	-	5	418494	CTD-2228K2.7	1
5:421193:C:G	eQTLcatalogue	GENCORD_ge_LCL	ENSG00000225138	G	4.23657e-07	0.351788	0.00211829	C	-	5	421193	CTD-2228K2.7	1
5:421403:A:G	eQTLcatalogue	GENCORD_ge_LCL	ENSG00000066230	G	4.54393e-08	0.244816	0.000227197	A	-	5	421403	SLC9A3	1
5:421403:A:G	eQTLcatalogue	GENCORD_ge_LCL	ENSG00000225138	G	9.97275e-10	0.438973	4.98637e-06	A	-	5	421403	CTD-2228K2.7	1
5:421455:G:T	eQTLcatalogue	GENCORD_ge_LCL	ENSG00000066230	G	1.24471e-07	0.23482	0.000622355	T	-	5	421455	SLC9A3	1
5:421455:G:T	eQTLcatalogue	GENCORD_ge_LCL	ENSG00000225138	G	2.48228e-09	0.424906	1.24114e-05	T	-	5	421455	CTD-2228K2.7	1
5:422178:A:G	eQTLcatalogue	GENCORD_ge_LCL	ENSG00000066230	G	2.40707e-06	0.207244	0.0120353	A	-	5	422178	SLC9A3	1
5:422178:A:G	eQTLcatalogue	GENCORD_ge_LCL	ENSG00000225138	G	2.17602e-08	0.393876	0.000108801	A	-	5	422178	CTD-2228K2.7	1
5:423169:C:T	eQTLcatalogue	GENCORD_ge_LCL	ENSG00000066230	C	2.22324e-06	0.207667	0.0111162	T	-	5	423169	SLC9A3	1
5:423169:C:T	eQTLcatalogue	GENCORD_ge_LCL	ENSG00000225138	C	2.03323e-08	0.394171	0.000101661	T	-	5	423169	CTD-2228K2.7	1
5:423595:C:T	eQTLcatalogue	GENCORD_ge_LCL	ENSG00000066230	C	2.20149e-06	0.207733	0.0110075	T	-	5	423595	SLC9A3	1
5:423595:C:T	eQTLcatalogue	GENCORD_ge_LCL	ENSG00000225138	C	2.02092e-08	0.394209	0.000101046	T	-	5	423595	CTD-2228K2.7	1
5:423671:C:T	eQTLcatalogue	GENCORD_ge_LCL	ENSG00000066230	C	2.20219e-06	0.207732	0.011011	T	-	5	423671	SLC9A3	1
5:423671:C:T	eQTLcatalogue	GENCORD_ge_LCL	ENSG00000225138	C	2.02131e-08	0.394208	0.000101065	T	-	5	423671	CTD-2228K2.7	1
5:423906:A:G	eQTLcatalogue	GENCORD_ge_LCL	ENSG00000066230	G	2.20329e-06	0.207726	0.0110164	A	-	5	423906	SLC9A3	1
5:423906:A:G	eQTLcatalogue	GENCORD_ge_LCL	ENSG00000225138	G	2.02297e-08	0.394195	0.000101148	A	-	5	423906	CTD-2228K2.7	1
5:428236:A:C	eQTLcatalogue	GENCORD_ge_LCL	ENSG00000066230	C	2.20728e-06	0.20769	0.0110364	A	-	5	428236	SLC9A3	1
5:428236:A:C	eQTLcatalogue	GENCORD_ge_LCL	ENSG00000225138	C	2.04003e-08	0.394063	0.000102001	A	-	5	428236	CTD-2228K2.7	1
5:429124:C:G	eQTLcatalogue	GENCORD_ge_LCL	ENSG00000066230	C	2.1893e-06	0.207803	0.0109465	G	-	5	429124	SLC9A3	1
5:429124:C:G	eQTLcatalogue	GENCORD_ge_LCL	ENSG00000225138	C	2.01861e-08	0.394264	0.00010093	G	-	5	429124	CTD-2228K2.7	1
5:429818:C:G	eQTLcatalogue	GENCORD_ge_LCL	ENSG00000066230	C	2.16723e-06	0.207937	0.0108361	G	-	5	429818	SLC9A3	1
5:429818:C:G	eQTLcatalogue	GENCORD_ge_LCL	ENSG00000225138	C	1.99425e-08	0.394494	9.97125e-05	G	-	5	429818	CTD-2228K2.7	1
5:430059:A:G	eQTLcatalogue	GENCORD_ge_LCL	ENSG00000066230	G	2.16446e-06	0.207953	0.0108223	A	-	5	430059	SLC9A3	1
5:430059:A:G	eQTLcatalogue	GENCORD_ge_LCL	ENSG00000225138	G	1.99143e-08	0.394519	9.95715e-05	A	-	5	430059	CTD-2228K2.7	1
5:430217:C:T	eQTLcatalogue	GENCORD_ge_LCL	ENSG00000066230	C	6.1819e-11	0.272439	3.09095e-07	T	-	5	430217	SLC9A3	1
5:430217:C:T	eQTLcatalogue	GENCORD_ge_LCL	ENSG00000225138	C	1.1461e-15	0.526215	5.7305e-12	T	-	5	430217	CTD-2228K2.7	1
5:434722:C:G	eQTLcatalogue	GENCORD_ge_LCL	ENSG00000066230	G	2.26794e-06	0.206066	0.0113397	C	-	5	434722	SLC9A3	1
5:434722:C:G	eQTLcatalogue	GENCORD_ge_LCL	ENSG00000225138	G	1.58744e-08	0.39418	7.9372e-05	C	-	5	434722	CTD-2228K2.7	1
5:436981:A:G	eQTLcatalogue	GENCORD_ge_LCL	ENSG00000225138	A	8.55746e-07	0.349535	0.00427873	G	-	5	436981	CTD-2228K2.7	1
5:437542:C:T	eQTLcatalogue	GENCORD_ge_LCL	ENSG00000066230	T	1.11229e-06	0.213896	0.00556145	C	-	5	437542	SLC9A3	1
5:437542:C:T	eQTLcatalogue	GENCORD_ge_LCL	ENSG00000225138	T	8.04208e-09	0.405336	4.02104e-05	C	-	5	437542	CTD-2228K2.7	1
5:437586:A:G	eQTLcatalogue	GENCORD_ge_LCL	ENSG00000066230	G	1.05685e-06	0.214251	0.00528425	A	-	5	437586	SLC9A3	1
5:437586:A:G	eQTLcatalogue	GENCORD_ge_LCL	ENSG00000225138	G	7.50875e-09	0.405963	3.75437e-05	A	-	5	437586	CTD-2228K2.7	1
5:437667:A:G	eQTLcatalogue	GENCORD_ge_LCL	ENSG00000066230	G	1.05685e-06	0.214251	0.00528425	A	-	5	437667	SLC9A3	1
5:437667:A:G	eQTLcatalogue	GENCORD_ge_LCL	ENSG00000225138	G	7.50875e-09	0.405963	3.75437e-05	A	-	5	437667	CTD-2228K2.7	1
5:437862:C:G	eQTLcatalogue	GENCORD_ge_LCL	ENSG00000066230	G	1.05685e-06	0.214251	0.00528425	C	-	5	437862	SLC9A3	1
5:437862:C:G	eQTLcatalogue	GENCORD_ge_LCL	ENSG00000225138	G	7.50875e-09	0.405963	3.75437e-05	C	-	5	437862	CTD-2228K2.7	1
5:418093:A:G	eQTLcatalogue	GENCORD_ge_T-cell	ENSG00000066230	A	4.04473e-06	-0.440407	0.0202236	G	+	5	418093	SLC9A3	1
5:418093:A:G	eQTLcatalogue	GENCORD_ge_T-cell	ENSG00000225138	A	6.53656e-08	-0.561935	0.000326828	G	+	5	418093	CTD-2228K2.7	1
5:421426:A:C	eQTLcatalogue	GENCORD_ge_T-cell	ENSG00000066230	A	7.08548e-06	-0.441782	0.0354274	C	+	5	421426	SLC9A3	1
5:421426:A:C	eQTLcatalogue	GENCORD_ge_T-cell	ENSG00000225138	A	1.11443e-07	-0.568132	0.000557215	C	+	5	421426	CTD-2228K2.7	1
2:68385097:A:G	eQTLcatalogue	GEUVADIS_ge_LCL	ENSG00000115946	A	2.72281e-15	0.0815759	1.36141e-11	G	-	2	68385097	PNO1	1
2:68393144:A:T	eQTLcatalogue	GEUVADIS_ge_LCL	ENSG00000115946	T	8.9684e-16	0.0841359	4.4842e-12	A	-	2	68393144	PNO1	1
2:68394184:C:T	eQTLcatalogue	GEUVADIS_ge_LCL	ENSG00000115946	C	3.02206e-16	0.0854489	1.51103e-12	T	-	2	68394184	PNO1	1
2:68395631:A:G	eQTLcatalogue	GEUVADIS_ge_LCL	ENSG00000115946	G	8.9684e-16	0.0841359	4.4842e-12	A	-	2	68395631	PNO1	1
2:68398919:C:G	eQTLcatalogue	GEUVADIS_ge_LCL	ENSG00000115946	G	3.02206e-16	0.0854489	1.51103e-12	C	-	2	68398919	PNO1	1
2:68399190:C:T	eQTLcatalogue	GEUVADIS_ge_LCL	ENSG00000115946	C	3.02206e-16	0.0854489	1.51103e-12	T	-	2	68399190	PNO1	1
2:68402012:G:T	eQTLcatalogue	GEUVADIS_ge_LCL	ENSG00000115946	G	2.30528e-16	0.0857959	1.15264e-12	T	-	2	68402012	PNO1	1
2:68402830:C:G	eQTLcatalogue	GEUVADIS_ge_LCL	ENSG00000115946	G	3.02206e-16	0.0854489	1.51103e-12	C	-	2	68402830	PNO1	1
2:68410372:A:C	eQTLcatalogue	GEUVADIS_ge_LCL	ENSG00000115946	C	3.02206e-16	0.0854489	1.51103e-12	A	-	2	68410372	PNO1	1
2:68410660:G:T	eQTLcatalogue	GEUVADIS_ge_LCL	ENSG00000115946	T	3.02206e-16	0.0854489	1.51103e-12	G	-	2	68410660	PNO1	1
2:68411414:A:G	eQTLcatalogue	GEUVADIS_ge_LCL	ENSG00000115946	G	3.02206e-16	0.0854489	1.51103e-12	A	-	2	68411414	PNO1	1
2:68418868:A:T	eQTLcatalogue	GEUVADIS_ge_LCL	ENSG00000115946	A	3.02206e-16	0.0854489	1.51103e-12	T	-	2	68418868	PNO1	1
2:68419487:A:G	eQTLcatalogue	GEUVADIS_ge_LCL	ENSG00000115946	G	3.02206e-16	0.0854489	1.51103e-12	A	-	2	68419487	PNO1	1
2:68420070:G:T	eQTLcatalogue	GEUVADIS_ge_LCL	ENSG00000115946	G	3.02206e-16	0.0854489	1.51103e-12	T	-	2	68420070	PNO1	1
2:68421049:A:G	eQTLcatalogue	GEUVADIS_ge_LCL	ENSG00000115946	G	3.02206e-16	0.0854489	1.51103e-12	A	-	2	68421049	PNO1	1
2:68422771:A:G	eQTLcatalogue	GEUVADIS_ge_LCL	ENSG00000115946	G	3.02206e-16	0.0854489	1.51103e-12	A	-	2	68422771	PNO1	1
2:68423530:A:G	eQTLcatalogue	GEUVADIS_ge_LCL	ENSG00000115946	G	3.02206e-16	0.0854489	1.51103e-12	A	-	2	68423530	PNO1	1
2:68430925:C:T	eQTLcatalogue	GEUVADIS_ge_LCL	ENSG00000115946	C	3.02206e-16	0.0854489	1.51103e-12	T	-	2	68430925	PNO1	1
2:68431259:A:G	eQTLcatalogue	GEUVADIS_ge_LCL	ENSG00000115946	G	3.02206e-16	0.0854489	1.51103e-12	A	-	2	68431259	PNO1	1
2:68433831:A:G	eQTLcatalogue	GEUVADIS_ge_LCL	ENSG00000115946	G	3.02206e-16	0.0854489	1.51103e-12	A	-	2	68433831	PNO1	1
2:68435431:C:G	eQTLcatalogue	GEUVADIS_ge_LCL	ENSG00000115946	C	3.02206e-16	0.0854489	1.51103e-12	G	-	2	68435431	PNO1	1
2:68438614:C:T	eQTLcatalogue	GEUVADIS_ge_LCL	ENSG00000115946	C	3.02206e-16	0.0854489	1.51103e-12	T	-	2	68438614	PNO1	1
2:68439960:C:T	eQTLcatalogue	GEUVADIS_ge_LCL	ENSG00000115946	C	2.22632e-16	0.0854278	1.11316e-12	T	-	2	68439960	PNO1	1
2:68443651:A:G	eQTLcatalogue	GEUVADIS_ge_LCL	ENSG00000115946	A	2.22632e-16	0.0854278	1.11316e-12	G	-	2	68443651	PNO1	1
2:68443835:A:T	eQTLcatalogue	GEUVADIS_ge_LCL	ENSG00000115946	A	2.22632e-16	0.0854278	1.11316e-12	T	-	2	68443835	PNO1	1
2:68446936:C:T	eQTLcatalogue	GEUVADIS_ge_LCL	ENSG00000115946	C	8.90468e-17	0.0865118	4.45234e-13	T	-	2	68446936	PNO1	1
2:68457573:C:T	eQTLcatalogue	GEUVADIS_ge_LCL	ENSG00000115946	C	8.90468e-17	0.0865118	4.45234e-13	T	-	2	68457573	PNO1	1
2:68457854:A:G	eQTLcatalogue	GEUVADIS_ge_LCL	ENSG00000115946	A	8.90468e-17	0.0865118	4.45234e-13	G	-	2	68457854	PNO1	1
2:68463612:A:G	eQTLcatalogue	GEUVADIS_ge_LCL	ENSG00000115946	G	8.90468e-17	0.0865118	4.45234e-13	A	-	2	68463612	PNO1	1
2:68467910:A:C	eQTLcatalogue	GEUVADIS_ge_LCL	ENSG00000115946	A	8.90468e-17	0.0865118	4.45234e-13	C	-	2	68467910	PNO1	1
2:68475595:A:C	eQTLcatalogue	GEUVADIS_ge_LCL	ENSG00000115946	C	8.90468e-17	0.0865118	4.45234e-13	A	-	2	68475595	PNO1	1
2:68477248:C:T	eQTLcatalogue	GEUVADIS_ge_LCL	ENSG00000115946	T	8.90468e-17	0.0865118	4.45234e-13	C	-	2	68477248	PNO1	1
2:68478919:A:G	eQTLcatalogue	GEUVADIS_ge_LCL	ENSG00000115946	A	5.30224e-16	0.0848199	2.65112e-12	G	-	2	68478919	PNO1	1
5:416118:A:G	eQTLcatalogue	GEUVADIS_ge_LCL	ENSG00000066230	G	7.06778e-10	0.22077	3.53389e-06	A	-	5	416118	SLC9A3	1
5:416118:A:G	eQTLcatalogue	GEUVADIS_ge_LCL	ENSG00000180104	G	1.24373e-10	-0.0555629	6.21865e-07	A	+	5	416118	EXOC3	1
5:416118:A:G	eQTLcatalogue	GEUVADIS_ge_LCL	ENSG00000225138	G	2.41172e-12	0.381589	1.20586e-08	A	-	5	416118	CTD-2228K2.7	1
5:416672:A:G	eQTLcatalogue	GEUVADIS_ge_LCL	ENSG00000066230	G	7.06778e-10	0.22077	3.53389e-06	A	-	5	416672	SLC9A3	1
5:416672:A:G	eQTLcatalogue	GEUVADIS_ge_LCL	ENSG00000180104	G	1.24373e-10	-0.0555629	6.21865e-07	A	+	5	416672	EXOC3	1
5:416672:A:G	eQTLcatalogue	GEUVADIS_ge_LCL	ENSG00000225138	G	2.41172e-12	0.381589	1.20586e-08	A	-	5	416672	CTD-2228K2.7	1
5:418093:A:G	eQTLcatalogue	GEUVADIS_ge_LCL	ENSG00000063438	A	3.37012e-06	0.195608	0.0168506	G	-	5	418093	AHRR	1
5:418494:A:G	eQTLcatalogue	GEUVADIS_ge_LCL	ENSG00000066230	A	7.06778e-10	0.22077	3.53389e-06	G	-	5	418494	SLC9A3	1
5:418494:A:G	eQTLcatalogue	GEUVADIS_ge_LCL	ENSG00000180104	A	1.24373e-10	-0.0555629	6.21865e-07	G	+	5	418494	EXOC3	1
5:418494:A:G	eQTLcatalogue	GEUVADIS_ge_LCL	ENSG00000225138	A	2.41172e-12	0.381589	1.20586e-08	G	-	5	418494	CTD-2228K2.7	1
5:421193:C:G	eQTLcatalogue	GEUVADIS_ge_LCL	ENSG00000066230	G	6.87982e-07	0.171635	0.00343991	C	-	5	421193	SLC9A3	1
5:421193:C:G	eQTLcatalogue	GEUVADIS_ge_LCL	ENSG00000180104	G	3.18534e-09	-0.0491728	1.59267e-05	C	+	5	421193	EXOC3	1
5:421193:C:G	eQTLcatalogue	GEUVADIS_ge_LCL	ENSG00000225138	G	4.14142e-08	0.289181	0.000207071	C	-	5	421193	CTD-2228K2.7	1
5:421403:A:G	eQTLcatalogue	GEUVADIS_ge_LCL	ENSG00000066230	G	5.33167e-10	0.223939	2.66583e-06	A	-	5	421403	SLC9A3	1
5:421403:A:G	eQTLcatalogue	GEUVADIS_ge_LCL	ENSG00000180104	G	1.11191e-10	-0.0561151	5.55955e-07	A	+	5	421403	EXOC3	1
5:421403:A:G	eQTLcatalogue	GEUVADIS_ge_LCL	ENSG00000225138	G	4.3066e-12	0.380177	2.1533e-08	A	-	5	421403	CTD-2228K2.7	1
5:421426:A:C	eQTLcatalogue	GEUVADIS_ge_LCL	ENSG00000063438	A	1.15107e-06	0.206199	0.00575535	C	-	5	421426	AHRR	1
5:421455:G:T	eQTLcatalogue	GEUVADIS_ge_LCL	ENSG00000066230	G	8.52248e-10	0.220706	4.26124e-06	T	-	5	421455	SLC9A3	1
5:421455:G:T	eQTLcatalogue	GEUVADIS_ge_LCL	ENSG00000180104	G	1.89776e-10	-0.0552702	9.4888e-07	T	+	5	421455	EXOC3	1
5:421455:G:T	eQTLcatalogue	GEUVADIS_ge_LCL	ENSG00000225138	G	3.19298e-12	0.38121	1.59649e-08	T	-	5	421455	CTD-2228K2.7	1
5:422178:A:G	eQTLcatalogue	GEUVADIS_ge_LCL	ENSG00000066230	G	4.2278e-09	0.20303	2.1139e-05	A	-	5	422178	SLC9A3	1
5:422178:A:G	eQTLcatalogue	GEUVADIS_ge_LCL	ENSG00000180104	G	8.27415e-13	-0.0591989	4.13708e-09	A	+	5	422178	EXOC3	1
5:422178:A:G	eQTLcatalogue	GEUVADIS_ge_LCL	ENSG00000225138	G	1.83078e-11	0.353107	9.1539e-08	A	-	5	422178	CTD-2228K2.7	1
5:423169:C:T	eQTLcatalogue	GEUVADIS_ge_LCL	ENSG00000066230	C	3.5844e-09	0.203788	1.7922e-05	T	-	5	423169	SLC9A3	1
5:423169:C:T	eQTLcatalogue	GEUVADIS_ge_LCL	ENSG00000180104	C	7.45005e-13	-0.0592678	3.72502e-09	T	+	5	423169	EXOC3	1
5:423169:C:T	eQTLcatalogue	GEUVADIS_ge_LCL	ENSG00000225138	C	1.28083e-11	0.355435	6.40415e-08	T	-	5	423169	CTD-2228K2.7	1
5:423595:C:T	eQTLcatalogue	GEUVADIS_ge_LCL	ENSG00000066230	C	3.5844e-09	0.203788	1.7922e-05	T	-	5	423595	SLC9A3	1
5:423595:C:T	eQTLcatalogue	GEUVADIS_ge_LCL	ENSG00000180104	C	7.45005e-13	-0.0592678	3.72502e-09	T	+	5	423595	EXOC3	1
5:423595:C:T	eQTLcatalogue	GEUVADIS_ge_LCL	ENSG00000225138	C	1.28083e-11	0.355435	6.40415e-08	T	-	5	423595	CTD-2228K2.7	1
5:423671:C:T	eQTLcatalogue	GEUVADIS_ge_LCL	ENSG00000066230	C	3.5844e-09	0.203788	1.7922e-05	T	-	5	423671	SLC9A3	1
5:423671:C:T	eQTLcatalogue	GEUVADIS_ge_LCL	ENSG00000180104	C	7.45005e-13	-0.0592678	3.72502e-09	T	+	5	423671	EXOC3	1
5:423671:C:T	eQTLcatalogue	GEUVADIS_ge_LCL	ENSG00000225138	C	1.28083e-11	0.355435	6.40415e-08	T	-	5	423671	CTD-2228K2.7	1
5:423906:A:G	eQTLcatalogue	GEUVADIS_ge_LCL	ENSG00000066230	G	3.5844e-09	0.203788	1.7922e-05	A	-	5	423906	SLC9A3	1
5:423906:A:G	eQTLcatalogue	GEUVADIS_ge_LCL	ENSG00000180104	G	7.45005e-13	-0.0592678	3.72502e-09	A	+	5	423906	EXOC3	1
5:423906:A:G	eQTLcatalogue	GEUVADIS_ge_LCL	ENSG00000225138	G	1.28083e-11	0.355435	6.40415e-08	A	-	5	423906	CTD-2228K2.7	1
5:428236:A:C	eQTLcatalogue	GEUVADIS_ge_LCL	ENSG00000066230	C	2.71731e-09	0.205447	1.35865e-05	A	-	5	428236	SLC9A3	1
5:428236:A:C	eQTLcatalogue	GEUVADIS_ge_LCL	ENSG00000180104	C	9.06976e-13	-0.0591005	4.53488e-09	A	+	5	428236	EXOC3	1
5:428236:A:C	eQTLcatalogue	GEUVADIS_ge_LCL	ENSG00000225138	C	1.00391e-11	0.357446	5.01955e-08	A	-	5	428236	CTD-2228K2.7	1
5:429124:C:G	eQTLcatalogue	GEUVADIS_ge_LCL	ENSG00000066230	C	2.71731e-09	0.205447	1.35865e-05	G	-	5	429124	SLC9A3	1
5:429124:C:G	eQTLcatalogue	GEUVADIS_ge_LCL	ENSG00000180104	C	9.06976e-13	-0.0591005	4.53488e-09	G	+	5	429124	EXOC3	1
5:429124:C:G	eQTLcatalogue	GEUVADIS_ge_LCL	ENSG00000225138	C	1.00391e-11	0.357446	5.01955e-08	G	-	5	429124	CTD-2228K2.7	1
5:429818:C:G	eQTLcatalogue	GEUVADIS_ge_LCL	ENSG00000066230	C	2.71731e-09	0.205447	1.35865e-05	G	-	5	429818	SLC9A3	1
5:429818:C:G	eQTLcatalogue	GEUVADIS_ge_LCL	ENSG00000180104	C	9.06976e-13	-0.0591005	4.53488e-09	G	+	5	429818	EXOC3	1
5:429818:C:G	eQTLcatalogue	GEUVADIS_ge_LCL	ENSG00000225138	C	1.00391e-11	0.357446	5.01955e-08	G	-	5	429818	CTD-2228K2.7	1
5:430059:A:G	eQTLcatalogue	GEUVADIS_ge_LCL	ENSG00000066230	G	2.71731e-09	0.205447	1.35865e-05	A	-	5	430059	SLC9A3	1
5:430059:A:G	eQTLcatalogue	GEUVADIS_ge_LCL	ENSG00000180104	G	9.06976e-13	-0.0591005	4.53488e-09	A	+	5	430059	EXOC3	1
5:430059:A:G	eQTLcatalogue	GEUVADIS_ge_LCL	ENSG00000225138	G	1.00391e-11	0.357446	5.01955e-08	A	-	5	430059	CTD-2228K2.7	1
5:430217:C:T	eQTLcatalogue	GEUVADIS_ge_LCL	ENSG00000066230	C	5.34815e-13	0.235619	2.67407e-09	T	-	5	430217	SLC9A3	1
5:430217:C:T	eQTLcatalogue	GEUVADIS_ge_LCL	ENSG00000180104	C	1.81457e-11	-0.0532166	9.07285e-08	T	+	5	430217	EXOC3	1
5:430217:C:T	eQTLcatalogue	GEUVADIS_ge_LCL	ENSG00000225138	C	1.86344e-18	0.431885	9.3172e-15	T	-	5	430217	CTD-2228K2.7	1
5:434722:C:G	eQTLcatalogue	GEUVADIS_ge_LCL	ENSG00000066230	G	5.10014e-09	0.202295	2.55007e-05	C	-	5	434722	SLC9A3	1
5:434722:C:G	eQTLcatalogue	GEUVADIS_ge_LCL	ENSG00000180104	G	5.97956e-12	-0.0571201	2.98978e-08	C	+	5	434722	EXOC3	1
5:434722:C:G	eQTLcatalogue	GEUVADIS_ge_LCL	ENSG00000225138	G	2.02179e-11	0.352909	1.01089e-07	C	-	5	434722	CTD-2228K2.7	1
5:436981:A:G	eQTLcatalogue	GEUVADIS_ge_LCL	ENSG00000066230	A	3.92948e-07	0.173144	0.00196474	G	-	5	436981	SLC9A3	1
5:436981:A:G	eQTLcatalogue	GEUVADIS_ge_LCL	ENSG00000180104	A	3.13273e-11	-0.0542033	1.56637e-07	G	+	5	436981	EXOC3	1
5:436981:A:G	eQTLcatalogue	GEUVADIS_ge_LCL	ENSG00000225138	A	1.94389e-08	0.292355	9.71945e-05	G	-	5	436981	CTD-2228K2.7	1
5:437542:C:T	eQTLcatalogue	GEUVADIS_ge_LCL	ENSG00000066230	T	2.71731e-09	0.205447	1.35865e-05	C	-	5	437542	SLC9A3	1
5:437542:C:T	eQTLcatalogue	GEUVADIS_ge_LCL	ENSG00000180104	T	9.06976e-13	-0.0591005	4.53488e-09	C	+	5	437542	EXOC3	1
5:437542:C:T	eQTLcatalogue	GEUVADIS_ge_LCL	ENSG00000225138	T	1.00391e-11	0.357446	5.01955e-08	C	-	5	437542	CTD-2228K2.7	1
5:437586:A:G	eQTLcatalogue	GEUVADIS_ge_LCL	ENSG00000066230	G	2.71731e-09	0.205447	1.35865e-05	A	-	5	437586	SLC9A3	1
5:437586:A:G	eQTLcatalogue	GEUVADIS_ge_LCL	ENSG00000180104	G	9.06976e-13	-0.0591005	4.53488e-09	A	+	5	437586	EXOC3	1
5:437586:A:G	eQTLcatalogue	GEUVADIS_ge_LCL	ENSG00000225138	G	1.00391e-11	0.357446	5.01955e-08	A	-	5	437586	CTD-2228K2.7	1
5:437667:A:G	eQTLcatalogue	GEUVADIS_ge_LCL	ENSG00000066230	G	2.71731e-09	0.205447	1.35865e-05	A	-	5	437667	SLC9A3	1
5:437667:A:G	eQTLcatalogue	GEUVADIS_ge_LCL	ENSG00000180104	G	9.06976e-13	-0.0591005	4.53488e-09	A	+	5	437667	EXOC3	1
5:437667:A:G	eQTLcatalogue	GEUVADIS_ge_LCL	ENSG00000225138	G	1.00391e-11	0.357446	5.01955e-08	A	-	5	437667	CTD-2228K2.7	1
5:437862:C:G	eQTLcatalogue	GEUVADIS_ge_LCL	ENSG00000066230	G	2.71731e-09	0.205447	1.35865e-05	C	-	5	437862	SLC9A3	1
5:437862:C:G	eQTLcatalogue	GEUVADIS_ge_LCL	ENSG00000180104	G	9.06976e-13	-0.0591005	4.53488e-09	C	+	5	437862	EXOC3	1
5:437862:C:G	eQTLcatalogue	GEUVADIS_ge_LCL	ENSG00000225138	G	1.00391e-11	0.357446	5.01955e-08	C	-	5	437862	CTD-2228K2.7	1
2:68418868:A:T	eQTLcatalogue	HipSci_ge_iPSC	ENSG00000221823	A	8.57798e-06	-0.0582751	0.0428899	T	+	2	68418868	PPP3R1	1
2:68419487:A:G	eQTLcatalogue	HipSci_ge_iPSC	ENSG00000221823	G	8.26841e-06	-0.0583578	0.041342	A	+	2	68419487	PPP3R1	1
2:68420070:G:T	eQTLcatalogue	HipSci_ge_iPSC	ENSG00000221823	G	7.98272e-06	-0.0584369	0.0399136	T	+	2	68420070	PPP3R1	1
2:68421049:A:G	eQTLcatalogue	HipSci_ge_iPSC	ENSG00000221823	G	7.6997e-06	-0.0585129	0.0384985	A	+	2	68421049	PPP3R1	1
2:68422771:A:G	eQTLcatalogue	HipSci_ge_iPSC	ENSG00000221823	G	7.31375e-06	-0.0586192	0.0365687	A	+	2	68422771	PPP3R1	1
2:68423530:A:G	eQTLcatalogue	HipSci_ge_iPSC	ENSG00000221823	G	6.95599e-06	-0.0587217	0.0347799	A	+	2	68423530	PPP3R1	1
2:68430925:C:T	eQTLcatalogue	HipSci_ge_iPSC	ENSG00000221823	C	5.01277e-06	-0.0592495	0.0250639	T	+	2	68430925	PPP3R1	1
2:68431259:A:G	eQTLcatalogue	HipSci_ge_iPSC	ENSG00000221823	G	4.96238e-06	-0.059259	0.0248119	A	+	2	68431259	PPP3R1	1
2:68433831:A:G	eQTLcatalogue	HipSci_ge_iPSC	ENSG00000221823	G	4.4573e-06	-0.0594009	0.0222865	A	+	2	68433831	PPP3R1	1
2:68435431:C:G	eQTLcatalogue	HipSci_ge_iPSC	ENSG00000221823	C	4.26493e-06	-0.0597551	0.0213247	G	+	2	68435431	PPP3R1	1
2:68438614:C:T	eQTLcatalogue	HipSci_ge_iPSC	ENSG00000221823	C	3.8917e-06	-0.0603227	0.0194585	T	+	2	68438614	PPP3R1	1
2:68439960:C:T	eQTLcatalogue	HipSci_ge_iPSC	ENSG00000221823	C	3.57852e-06	-0.0606828	0.0178926	T	+	2	68439960	PPP3R1	1
2:68443651:A:G	eQTLcatalogue	HipSci_ge_iPSC	ENSG00000221823	A	3.28724e-06	-0.0612461	0.0164362	G	+	2	68443651	PPP3R1	1
2:68443835:A:T	eQTLcatalogue	HipSci_ge_iPSC	ENSG00000221823	A	3.26709e-06	-0.0612564	0.0163355	T	+	2	68443835	PPP3R1	1
2:68446936:C:T	eQTLcatalogue	HipSci_ge_iPSC	ENSG00000221823	C	3.02781e-06	-0.0617161	0.015139	T	+	2	68446936	PPP3R1	1
2:68457573:C:T	eQTLcatalogue	HipSci_ge_iPSC	ENSG00000221823	C	2.53592e-06	-0.0630449	0.0126796	T	+	2	68457573	PPP3R1	1
2:68457854:A:G	eQTLcatalogue	HipSci_ge_iPSC	ENSG00000221823	A	2.48106e-06	-0.0631267	0.0124053	G	+	2	68457854	PPP3R1	1
2:68463612:A:G	eQTLcatalogue	HipSci_ge_iPSC	ENSG00000221823	G	2.36014e-06	-0.0637039	0.0118007	A	+	2	68463612	PPP3R1	1
2:68467910:A:C	eQTLcatalogue	HipSci_ge_iPSC	ENSG00000221823	A	2.10875e-06	-0.0641482	0.0105437	C	+	2	68467910	PPP3R1	1
2:68475595:A:C	eQTLcatalogue	HipSci_ge_iPSC	ENSG00000221823	C	1.84471e-06	-0.0648419	0.00922355	A	+	2	68475595	PPP3R1	1
2:68477248:C:T	eQTLcatalogue	HipSci_ge_iPSC	ENSG00000221823	T	1.71085e-06	-0.065291	0.00855425	C	+	2	68477248	PPP3R1	1
2:68478919:A:G	eQTLcatalogue	HipSci_ge_iPSC	ENSG00000221823	A	1.89634e-06	-0.0652329	0.0094817	G	+	2	68478919	PPP3R1	1
5:416118:A:G	eQTLcatalogue	HipSci_ge_iPSC	ENSG00000180104	G	2.16405e-07	-0.0596335	0.00108202	A	+	5	416118	EXOC3	1
5:416118:A:G	eQTLcatalogue	HipSci_ge_iPSC	ENSG00000225138	G	1.94036e-09	0.457044	9.7018e-06	A	-	5	416118	CTD-2228K2.7	1
5:416672:A:G	eQTLcatalogue	HipSci_ge_iPSC	ENSG00000180104	G	1.85343e-07	-0.0599214	0.000926715	A	+	5	416672	EXOC3	1
5:416672:A:G	eQTLcatalogue	HipSci_ge_iPSC	ENSG00000225138	G	1.7972e-09	0.457712	8.986e-06	A	-	5	416672	CTD-2228K2.7	1
5:418494:A:G	eQTLcatalogue	HipSci_ge_iPSC	ENSG00000180104	A	1.3806e-07	-0.0604132	0.0006903	G	+	5	418494	EXOC3	1
5:418494:A:G	eQTLcatalogue	HipSci_ge_iPSC	ENSG00000225138	A	1.59987e-09	0.458258	7.99935e-06	G	-	5	418494	CTD-2228K2.7	1
5:421193:C:G	eQTLcatalogue	HipSci_ge_iPSC	ENSG00000180104	G	2.30066e-06	-0.0550875	0.0115033	C	+	5	421193	EXOC3	1
5:421193:C:G	eQTLcatalogue	HipSci_ge_iPSC	ENSG00000225138	G	1.18027e-09	0.467463	5.90135e-06	C	-	5	421193	CTD-2228K2.7	1
5:421403:A:G	eQTLcatalogue	HipSci_ge_iPSC	ENSG00000180104	G	7.11109e-08	-0.0618728	0.000355554	A	+	5	421403	EXOC3	1
5:421403:A:G	eQTLcatalogue	HipSci_ge_iPSC	ENSG00000225138	G	5.42326e-10	0.471643	2.71163e-06	A	-	5	421403	CTD-2228K2.7	1
5:421455:G:T	eQTLcatalogue	HipSci_ge_iPSC	ENSG00000180104	G	7.34281e-08	-0.0613128	0.000367141	T	+	5	421455	EXOC3	1
5:421455:G:T	eQTLcatalogue	HipSci_ge_iPSC	ENSG00000225138	G	1.35727e-09	0.457484	6.78635e-06	T	-	5	421455	CTD-2228K2.7	1
5:422178:A:G	eQTLcatalogue	HipSci_ge_iPSC	ENSG00000180104	G	1.07745e-09	-0.0653476	5.38725e-06	A	+	5	422178	EXOC3	1
5:422178:A:G	eQTLcatalogue	HipSci_ge_iPSC	ENSG00000225138	G	6.02773e-06	0.327513	0.0301387	A	-	5	422178	CTD-2228K2.7	1
5:423169:C:T	eQTLcatalogue	HipSci_ge_iPSC	ENSG00000180104	C	1.07304e-09	-0.0650585	5.3652e-06	T	+	5	423169	EXOC3	1
5:423169:C:T	eQTLcatalogue	HipSci_ge_iPSC	ENSG00000225138	C	6.44866e-06	0.325033	0.0322433	T	-	5	423169	CTD-2228K2.7	1
5:423595:C:T	eQTLcatalogue	HipSci_ge_iPSC	ENSG00000180104	C	1.04099e-09	-0.0650704	5.20495e-06	T	+	5	423595	EXOC3	1
5:423595:C:T	eQTLcatalogue	HipSci_ge_iPSC	ENSG00000225138	C	6.7473e-06	0.324179	0.0337365	T	-	5	423595	CTD-2228K2.7	1
5:423671:C:T	eQTLcatalogue	HipSci_ge_iPSC	ENSG00000180104	C	1.03309e-09	-0.0650734	5.16545e-06	T	+	5	423671	EXOC3	1
5:423671:C:T	eQTLcatalogue	HipSci_ge_iPSC	ENSG00000225138	C	6.83165e-06	0.323949	0.0341583	T	-	5	423671	CTD-2228K2.7	1
5:423906:A:G	eQTLcatalogue	HipSci_ge_iPSC	ENSG00000180104	G	1.02564e-09	-0.065073	5.1282e-06	A	+	5	423906	EXOC3	1
5:423906:A:G	eQTLcatalogue	HipSci_ge_iPSC	ENSG00000225138	G	6.94725e-06	0.32364	0.0347363	A	-	5	423906	CTD-2228K2.7	1
5:428236:A:C	eQTLcatalogue	HipSci_ge_iPSC	ENSG00000180104	C	9.69606e-10	-0.0645675	4.84803e-06	A	+	5	428236	EXOC3	1
5:429124:C:G	eQTLcatalogue	HipSci_ge_iPSC	ENSG00000180104	C	9.78536e-10	-0.0645701	4.89268e-06	G	+	5	429124	EXOC3	1
5:429818:C:G	eQTLcatalogue	HipSci_ge_iPSC	ENSG00000180104	C	9.8538e-10	-0.0645931	4.9269e-06	G	+	5	429818	EXOC3	1
5:430059:A:G	eQTLcatalogue	HipSci_ge_iPSC	ENSG00000180104	G	9.85657e-10	-0.0645942	4.92828e-06	A	+	5	430059	EXOC3	1
5:430217:C:T	eQTLcatalogue	HipSci_ge_iPSC	ENSG00000180104	C	4.86922e-08	-0.0565435	0.000243461	T	+	5	430217	EXOC3	1
5:430217:C:T	eQTLcatalogue	HipSci_ge_iPSC	ENSG00000225138	C	4.543e-07	0.349693	0.0022715	T	-	5	430217	CTD-2228K2.7	1
5:434722:C:G	eQTLcatalogue	HipSci_ge_iPSC	ENSG00000180104	G	1.00476e-09	-0.0646504	5.0238e-06	C	+	5	434722	EXOC3	1
5:436981:A:G	eQTLcatalogue	HipSci_ge_iPSC	ENSG00000180104	A	4.91731e-08	-0.0592737	0.000245866	G	+	5	436981	EXOC3	1
5:436981:A:G	eQTLcatalogue	HipSci_ge_iPSC	ENSG00000225138	A	7.76316e-06	0.326409	0.0388158	G	-	5	436981	CTD-2228K2.7	1
5:437542:C:T	eQTLcatalogue	HipSci_ge_iPSC	ENSG00000180104	T	1.04009e-09	-0.0646161	5.20045e-06	C	+	5	437542	EXOC3	1
5:437586:A:G	eQTLcatalogue	HipSci_ge_iPSC	ENSG00000180104	G	1.03916e-09	-0.0646176	5.1958e-06	A	+	5	437586	EXOC3	1
5:437667:A:G	eQTLcatalogue	HipSci_ge_iPSC	ENSG00000180104	G	1.04078e-09	-0.0646156	5.2039e-06	A	+	5	437667	EXOC3	1
5:437862:C:G	eQTLcatalogue	HipSci_ge_iPSC	ENSG00000180104	G	1.04185e-09	-0.0646176	5.20925e-06	C	+	5	437862	EXOC3	1
2:68399190:C:T	eQTLcatalogue	Lepik_2017_ge_blood	ENSG00000115946	C	5.76955e-06	0.0567057	0.0288478	T	-	2	68399190	PNO1	1
2:68399190:C:T	eQTLcatalogue	Lepik_2017_ge_blood	ENSG00000273275	C	8.13464e-06	-0.228599	0.0406732	T	+	2	68399190	RP11-474G23.2	1
2:68402830:C:G	eQTLcatalogue	Lepik_2017_ge_blood	ENSG00000273275	G	5.64213e-06	-0.234221	0.0282107	C	+	2	68402830	RP11-474G23.2	1
2:68431259:A:G	eQTLcatalogue	Lepik_2017_ge_blood	ENSG00000273275	G	9.89161e-06	-0.228947	0.0494581	A	+	2	68431259	RP11-474G23.2	1
2:68435431:C:G	eQTLcatalogue	Lepik_2017_ge_blood	ENSG00000273275	C	6.19221e-06	-0.233061	0.030961	G	+	2	68435431	RP11-474G23.2	1
2:68439960:C:T	eQTLcatalogue	Lepik_2017_ge_blood	ENSG00000273275	C	9.49546e-06	-0.22878	0.0474773	T	+	2	68439960	RP11-474G23.2	1
2:68443835:A:T	eQTLcatalogue	Lepik_2017_ge_blood	ENSG00000273275	A	9.07904e-06	-0.230049	0.0453952	T	+	2	68443835	RP11-474G23.2	1
2:68446936:C:T	eQTLcatalogue	Lepik_2017_ge_blood	ENSG00000115946	C	5.99025e-06	0.0566511	0.0299512	T	-	2	68446936	PNO1	1
2:68457573:C:T	eQTLcatalogue	Lepik_2017_ge_blood	ENSG00000115946	C	4.05282e-06	0.0578863	0.0202641	T	-	2	68457573	PNO1	1
2:68457854:A:G	eQTLcatalogue	Lepik_2017_ge_blood	ENSG00000115946	A	3.16956e-06	0.0582751	0.0158478	G	-	2	68457854	PNO1	1
2:68457854:A:G	eQTLcatalogue	Lepik_2017_ge_blood	ENSG00000273275	A	9.77105e-06	-0.226791	0.0488553	G	+	2	68457854	RP11-474G23.2	1
2:68463612:A:G	eQTLcatalogue	Lepik_2017_ge_blood	ENSG00000115946	G	3.33325e-06	0.0582373	0.0166663	A	-	2	68463612	PNO1	1
2:68467910:A:C	eQTLcatalogue	Lepik_2017_ge_blood	ENSG00000115946	A	1.82167e-06	0.0599378	0.00910835	C	-	2	68467910	PNO1	1
2:68475595:A:C	eQTLcatalogue	Lepik_2017_ge_blood	ENSG00000115946	C	3.33325e-06	0.0582373	0.0166663	A	-	2	68475595	PNO1	1
2:68478919:A:G	eQTLcatalogue	Lepik_2017_ge_blood	ENSG00000115946	A	3.47067e-06	0.0580905	0.0173534	G	-	2	68478919	PNO1	1
5:416118:A:G	eQTLcatalogue	Lepik_2017_ge_blood	ENSG00000180104	G	2.56015e-38	-0.110004	1.28007e-34	A	+	5	416118	EXOC3	1
5:416118:A:G	eQTLcatalogue	Lepik_2017_ge_blood	ENSG00000221990	G	1.86688e-10	0.21773	9.3344e-07	A	-	5	416118	C5orf55	1
5:416118:A:G	eQTLcatalogue	Lepik_2017_ge_blood	ENSG00000225138	G	2.40178e-21	0.493151	1.20089e-17	A	-	5	416118	CTD-2228K2.7	1
5:416672:A:G	eQTLcatalogue	Lepik_2017_ge_blood	ENSG00000180104	G	2.56015e-38	-0.110004	1.28007e-34	A	+	5	416672	EXOC3	1
5:416672:A:G	eQTLcatalogue	Lepik_2017_ge_blood	ENSG00000221990	G	1.86688e-10	0.21773	9.3344e-07	A	-	5	416672	C5orf55	1
5:416672:A:G	eQTLcatalogue	Lepik_2017_ge_blood	ENSG00000225138	G	2.40178e-21	0.493151	1.20089e-17	A	-	5	416672	CTD-2228K2.7	1
5:418093:A:G	eQTLcatalogue	Lepik_2017_ge_blood	ENSG00000180104	A	2.80166e-19	-0.11064	1.40083e-15	G	+	5	418093	EXOC3	1
5:418093:A:G	eQTLcatalogue	Lepik_2017_ge_blood	ENSG00000225138	A	1.5293e-08	-0.420645	7.6465e-05	G	+	5	418093	CTD-2228K2.7	1
5:418494:A:G	eQTLcatalogue	Lepik_2017_ge_blood	ENSG00000180104	A	2.56015e-38	-0.110004	1.28007e-34	G	+	5	418494	EXOC3	1
5:418494:A:G	eQTLcatalogue	Lepik_2017_ge_blood	ENSG00000221990	A	1.86688e-10	0.21773	9.3344e-07	G	-	5	418494	C5orf55	1
5:418494:A:G	eQTLcatalogue	Lepik_2017_ge_blood	ENSG00000225138	A	2.40178e-21	0.493151	1.20089e-17	G	-	5	418494	CTD-2228K2.7	1
5:421193:C:G	eQTLcatalogue	Lepik_2017_ge_blood	ENSG00000180104	G	1.08425e-26	-0.0904011	5.42125e-23	C	+	5	421193	EXOC3	1
5:421193:C:G	eQTLcatalogue	Lepik_2017_ge_blood	ENSG00000221990	G	3.43089e-06	0.155165	0.0171545	C	-	5	421193	C5orf55	1
5:421193:C:G	eQTLcatalogue	Lepik_2017_ge_blood	ENSG00000225138	G	2.35151e-19	0.454909	1.17575e-15	C	-	5	421193	CTD-2228K2.7	1
5:421403:A:G	eQTLcatalogue	Lepik_2017_ge_blood	ENSG00000180104	G	7.85951e-38	-0.110069	3.92976e-34	A	+	5	421403	EXOC3	1
5:421403:A:G	eQTLcatalogue	Lepik_2017_ge_blood	ENSG00000221990	G	3.14199e-10	0.216434	1.57099e-06	A	-	5	421403	C5orf55	1
5:421403:A:G	eQTLcatalogue	Lepik_2017_ge_blood	ENSG00000225138	G	1.28152e-23	0.521201	6.4076e-20	A	-	5	421403	CTD-2228K2.7	1
5:421426:A:C	eQTLcatalogue	Lepik_2017_ge_blood	ENSG00000180104	A	1.18681e-18	-0.108857	5.93405e-15	C	+	5	421426	EXOC3	1
5:421426:A:C	eQTLcatalogue	Lepik_2017_ge_blood	ENSG00000225138	A	3.18351e-08	-0.41162	0.000159175	C	+	5	421426	CTD-2228K2.7	1
5:421455:G:T	eQTLcatalogue	Lepik_2017_ge_blood	ENSG00000180104	G	1.57939e-38	-0.11055	7.89695e-35	T	+	5	421455	EXOC3	1
5:421455:G:T	eQTLcatalogue	Lepik_2017_ge_blood	ENSG00000221990	G	8.3792e-10	0.210589	4.1896e-06	T	-	5	421455	C5orf55	1
5:421455:G:T	eQTLcatalogue	Lepik_2017_ge_blood	ENSG00000225138	G	1.42481e-22	0.508084	7.12405e-19	T	-	5	421455	CTD-2228K2.7	1
5:422178:A:G	eQTLcatalogue	Lepik_2017_ge_blood	ENSG00000180104	G	6.7997e-58	-0.128344	3.39985e-54	A	+	5	422178	EXOC3	1
5:422178:A:G	eQTLcatalogue	Lepik_2017_ge_blood	ENSG00000221990	G	8.24472e-13	0.239345	4.12236e-09	A	-	5	422178	C5orf55	1
5:422178:A:G	eQTLcatalogue	Lepik_2017_ge_blood	ENSG00000225138	G	1.90451e-16	0.425868	9.52255e-13	A	-	5	422178	CTD-2228K2.7	1
5:423169:C:T	eQTLcatalogue	Lepik_2017_ge_blood	ENSG00000180104	C	5.2488e-61	-0.129828	2.6244e-57	T	+	5	423169	EXOC3	1
5:423169:C:T	eQTLcatalogue	Lepik_2017_ge_blood	ENSG00000221990	C	4.78576e-13	0.23962	2.39288e-09	T	-	5	423169	C5orf55	1
5:423169:C:T	eQTLcatalogue	Lepik_2017_ge_blood	ENSG00000225138	C	1.15558e-15	0.411749	5.7779e-12	T	-	5	423169	CTD-2228K2.7	1
5:423595:C:T	eQTLcatalogue	Lepik_2017_ge_blood	ENSG00000180104	C	4.87738e-61	-0.130005	2.43869e-57	T	+	5	423595	EXOC3	1
5:423595:C:T	eQTLcatalogue	Lepik_2017_ge_blood	ENSG00000221990	C	6.36843e-13	0.238679	3.18422e-09	T	-	5	423595	C5orf55	1
5:423595:C:T	eQTLcatalogue	Lepik_2017_ge_blood	ENSG00000225138	C	1.54828e-15	0.410495	7.7414e-12	T	-	5	423595	CTD-2228K2.7	1
5:423671:C:T	eQTLcatalogue	Lepik_2017_ge_blood	ENSG00000180104	C	3.38534e-60	-0.129516	1.69267e-56	T	+	5	423671	EXOC3	1
5:423671:C:T	eQTLcatalogue	Lepik_2017_ge_blood	ENSG00000221990	C	2.80804e-13	0.242527	1.40402e-09	T	-	5	423671	C5orf55	1
5:423671:C:T	eQTLcatalogue	Lepik_2017_ge_blood	ENSG00000225138	C	6.51075e-16	0.416235	3.25537e-12	T	-	5	423671	CTD-2228K2.7	1
5:423906:A:G	eQTLcatalogue	Lepik_2017_ge_blood	ENSG00000180104	G	1.51212e-60	-0.129041	7.5606e-57	A	+	5	423906	EXOC3	1
5:423906:A:G	eQTLcatalogue	Lepik_2017_ge_blood	ENSG00000221990	G	3.75803e-13	0.239877	1.87902e-09	A	-	5	423906	C5orf55	1
5:423906:A:G	eQTLcatalogue	Lepik_2017_ge_blood	ENSG00000225138	G	2.36115e-15	0.406204	1.18057e-11	A	-	5	423906	CTD-2228K2.7	1
5:428236:A:C	eQTLcatalogue	Lepik_2017_ge_blood	ENSG00000180104	C	1.49512e-59	-0.129901	7.4756e-56	A	+	5	428236	EXOC3	1
5:428236:A:C	eQTLcatalogue	Lepik_2017_ge_blood	ENSG00000221990	C	4.45936e-13	0.242279	2.22968e-09	A	-	5	428236	C5orf55	1
5:428236:A:C	eQTLcatalogue	Lepik_2017_ge_blood	ENSG00000225138	C	1.0281e-14	0.402508	5.1405e-11	A	-	5	428236	CTD-2228K2.7	1
5:429124:C:G	eQTLcatalogue	Lepik_2017_ge_blood	ENSG00000180104	C	1.16825e-60	-0.129965	5.84125e-57	G	+	5	429124	EXOC3	1
5:429124:C:G	eQTLcatalogue	Lepik_2017_ge_blood	ENSG00000221990	C	7.04721e-13	0.238738	3.52361e-09	G	-	5	429124	C5orf55	1
5:429124:C:G	eQTLcatalogue	Lepik_2017_ge_blood	ENSG00000225138	C	1.63533e-15	0.411019	8.17665e-12	G	-	5	429124	CTD-2228K2.7	1
5:429818:C:G	eQTLcatalogue	Lepik_2017_ge_blood	ENSG00000180104	C	1.05758e-61	-0.13054	5.2879e-58	G	+	5	429818	EXOC3	1
5:429818:C:G	eQTLcatalogue	Lepik_2017_ge_blood	ENSG00000221990	C	5.82945e-13	0.239057	2.91472e-09	G	-	5	429818	C5orf55	1
5:429818:C:G	eQTLcatalogue	Lepik_2017_ge_blood	ENSG00000225138	C	1.17719e-15	0.412118	5.88595e-12	G	-	5	429818	CTD-2228K2.7	1
5:430059:A:G	eQTLcatalogue	Lepik_2017_ge_blood	ENSG00000180104	G	5.2488e-61	-0.129828	2.6244e-57	A	+	5	430059	EXOC3	1
5:430059:A:G	eQTLcatalogue	Lepik_2017_ge_blood	ENSG00000221990	G	4.78576e-13	0.23962	2.39288e-09	A	-	5	430059	C5orf55	1
5:430059:A:G	eQTLcatalogue	Lepik_2017_ge_blood	ENSG00000225138	G	1.15558e-15	0.411749	5.7779e-12	A	-	5	430059	CTD-2228K2.7	1
5:430217:C:T	eQTLcatalogue	Lepik_2017_ge_blood	ENSG00000180104	C	1.32911e-38	-0.104874	6.64555e-35	T	+	5	430217	EXOC3	1
5:430217:C:T	eQTLcatalogue	Lepik_2017_ge_blood	ENSG00000221990	C	2.05113e-07	0.169896	0.00102556	T	-	5	430217	C5orf55	1
5:430217:C:T	eQTLcatalogue	Lepik_2017_ge_blood	ENSG00000225138	C	2.47591e-24	0.499334	1.23796e-20	T	-	5	430217	CTD-2228K2.7	1
5:434722:C:G	eQTLcatalogue	Lepik_2017_ge_blood	ENSG00000180104	G	7.57288e-61	-0.129136	3.78644e-57	C	+	5	434722	EXOC3	1
5:434722:C:G	eQTLcatalogue	Lepik_2017_ge_blood	ENSG00000221990	G	1.64364e-13	0.243055	8.2182e-10	C	-	5	434722	C5orf55	1
5:434722:C:G	eQTLcatalogue	Lepik_2017_ge_blood	ENSG00000225138	G	1.42049e-15	0.408747	7.10245e-12	C	-	5	434722	CTD-2228K2.7	1
5:436981:A:G	eQTLcatalogue	Lepik_2017_ge_blood	ENSG00000180104	A	2.41077e-42	-0.112483	1.20538e-38	G	+	5	436981	EXOC3	1
5:436981:A:G	eQTLcatalogue	Lepik_2017_ge_blood	ENSG00000221990	A	1.828e-11	0.224356	9.14e-08	G	-	5	436981	C5orf55	1
5:436981:A:G	eQTLcatalogue	Lepik_2017_ge_blood	ENSG00000225138	A	6.9448e-13	0.373034	3.4724e-09	G	-	5	436981	CTD-2228K2.7	1
5:437542:C:T	eQTLcatalogue	Lepik_2017_ge_blood	ENSG00000180104	T	1.32187e-61	-0.13031	6.60935e-58	C	+	5	437542	EXOC3	1
5:437542:C:T	eQTLcatalogue	Lepik_2017_ge_blood	ENSG00000221990	T	1.00596e-12	0.236436	5.0298e-09	C	-	5	437542	C5orf55	1
5:437542:C:T	eQTLcatalogue	Lepik_2017_ge_blood	ENSG00000225138	T	7.70987e-16	0.414128	3.85493e-12	C	-	5	437542	CTD-2228K2.7	1
5:437586:A:G	eQTLcatalogue	Lepik_2017_ge_blood	ENSG00000180104	G	1.32187e-61	-0.13031	6.60935e-58	A	+	5	437586	EXOC3	1
5:437586:A:G	eQTLcatalogue	Lepik_2017_ge_blood	ENSG00000221990	G	1.00596e-12	0.236436	5.0298e-09	A	-	5	437586	C5orf55	1
5:437586:A:G	eQTLcatalogue	Lepik_2017_ge_blood	ENSG00000225138	G	7.70987e-16	0.414128	3.85493e-12	A	-	5	437586	CTD-2228K2.7	1
5:437667:A:G	eQTLcatalogue	Lepik_2017_ge_blood	ENSG00000180104	G	1.32187e-61	-0.13031	6.60935e-58	A	+	5	437667	EXOC3	1
5:437667:A:G	eQTLcatalogue	Lepik_2017_ge_blood	ENSG00000221990	G	1.00596e-12	0.236436	5.0298e-09	A	-	5	437667	C5orf55	1
5:437667:A:G	eQTLcatalogue	Lepik_2017_ge_blood	ENSG00000225138	G	7.70987e-16	0.414128	3.85493e-12	A	-	5	437667	CTD-2228K2.7	1
5:437862:C:G	eQTLcatalogue	Lepik_2017_ge_blood	ENSG00000180104	G	1.45293e-59	-0.127943	7.26465e-56	C	+	5	437862	EXOC3	1
5:437862:C:G	eQTLcatalogue	Lepik_2017_ge_blood	ENSG00000221990	G	3.01079e-12	0.230372	1.5054e-08	C	-	5	437862	C5orf55	1
5:437862:C:G	eQTLcatalogue	Lepik_2017_ge_blood	ENSG00000225138	G	1.0873e-15	0.409852	5.4365e-12	C	-	5	437862	CTD-2228K2.7	1
5:416118:A:G	eQTLcatalogue	Naranbhai_2015_neutrophil_CD16	ENSG00000180104	G	2.48635e-09	-0.194832	1.24317e-05	A	+	5	416118	EXOC3	1
5:416672:A:G	eQTLcatalogue	Naranbhai_2015_neutrophil_CD16	ENSG00000180104	G	2.3815e-09	-0.195099	1.19075e-05	A	+	5	416672	EXOC3	1
5:418093:A:G	eQTLcatalogue	Naranbhai_2015_neutrophil_CD16	ENSG00000180104	A	8.03789e-06	-0.219446	0.0401894	G	+	5	418093	EXOC3	1
5:418494:A:G	eQTLcatalogue	Naranbhai_2015_neutrophil_CD16	ENSG00000180104	A	2.19824e-09	-0.19559	1.09912e-05	G	+	5	418494	EXOC3	1
5:421193:C:G	eQTLcatalogue	Naranbhai_2015_neutrophil_CD16	ENSG00000180104	G	2.14315e-06	-0.16309	0.0107157	C	+	5	421193	EXOC3	1
5:421403:A:G	eQTLcatalogue	Naranbhai_2015_neutrophil_CD16	ENSG00000180104	G	1.82214e-09	-0.196862	9.1107e-06	A	+	5	421403	EXOC3	1
5:421426:A:C	eQTLcatalogue	Naranbhai_2015_neutrophil_CD16	ENSG00000180104	A	6.84003e-06	-0.221652	0.0342001	C	+	5	421426	EXOC3	1
5:421455:G:T	eQTLcatalogue	Naranbhai_2015_neutrophil_CD16	ENSG00000180104	G	1.89311e-09	-0.19662	9.46555e-06	T	+	5	421455	EXOC3	1
5:422178:A:G	eQTLcatalogue	Naranbhai_2015_neutrophil_CD16	ENSG00000180104	G	2.97628e-13	-0.218576	1.48814e-09	A	+	5	422178	EXOC3	1
5:423169:C:T	eQTLcatalogue	Naranbhai_2015_neutrophil_CD16	ENSG00000180104	C	2.93378e-13	-0.218349	1.46689e-09	T	+	5	423169	EXOC3	1
5:423595:C:T	eQTLcatalogue	Naranbhai_2015_neutrophil_CD16	ENSG00000180104	C	2.92392e-13	-0.218342	1.46196e-09	T	+	5	423595	EXOC3	1
5:423671:C:T	eQTLcatalogue	Naranbhai_2015_neutrophil_CD16	ENSG00000180104	C	2.92288e-13	-0.21834	1.46144e-09	T	+	5	423671	EXOC3	1
5:423906:A:G	eQTLcatalogue	Naranbhai_2015_neutrophil_CD16	ENSG00000180104	G	2.91759e-13	-0.218344	1.4588e-09	A	+	5	423906	EXOC3	1
5:428236:A:C	eQTLcatalogue	Naranbhai_2015_neutrophil_CD16	ENSG00000180104	C	2.66313e-13	-0.217738	1.33157e-09	A	+	5	428236	EXOC3	1
5:429124:C:G	eQTLcatalogue	Naranbhai_2015_neutrophil_CD16	ENSG00000180104	C	2.13587e-13	-0.218439	1.06793e-09	G	+	5	429124	EXOC3	1
5:429818:C:G	eQTLcatalogue	Naranbhai_2015_neutrophil_CD16	ENSG00000180104	C	1.74288e-13	-0.218923	8.7144e-10	G	+	5	429818	EXOC3	1
5:430059:A:G	eQTLcatalogue	Naranbhai_2015_neutrophil_CD16	ENSG00000180104	G	1.70514e-13	-0.218958	8.5257e-10	A	+	5	430059	EXOC3	1
5:430217:C:T	eQTLcatalogue	Naranbhai_2015_neutrophil_CD16	ENSG00000180104	C	1.01503e-11	-0.213749	5.07515e-08	T	+	5	430217	EXOC3	1
5:434722:C:G	eQTLcatalogue	Naranbhai_2015_neutrophil_CD16	ENSG00000180104	G	1.37966e-13	-0.218281	6.8983e-10	C	+	5	434722	EXOC3	1
5:436981:A:G	eQTLcatalogue	Naranbhai_2015_neutrophil_CD16	ENSG00000180104	A	1.03909e-12	-0.223211	5.19545e-09	G	+	5	436981	EXOC3	1
5:437542:C:T	eQTLcatalogue	Naranbhai_2015_neutrophil_CD16	ENSG00000180104	T	1.37283e-13	-0.218308	6.86415e-10	C	+	5	437542	EXOC3	1
5:437586:A:G	eQTLcatalogue	Naranbhai_2015_neutrophil_CD16	ENSG00000180104	G	1.37283e-13	-0.218308	6.86415e-10	A	+	5	437586	EXOC3	1
5:437667:A:G	eQTLcatalogue	Naranbhai_2015_neutrophil_CD16	ENSG00000180104	G	1.37358e-13	-0.218305	6.8679e-10	A	+	5	437667	EXOC3	1
5:437862:C:G	eQTLcatalogue	Naranbhai_2015_neutrophil_CD16	ENSG00000180104	G	1.37433e-13	-0.218303	6.87165e-10	C	+	5	437862	EXOC3	1
5:418093:A:G	eQTLcatalogue	Nedelec_2016_ge_macrophage_Listeria	ENSG00000225138	A	2.65523e-08	-0.532443	0.000132761	G	+	5	418093	CTD-2228K2.7	1
5:421426:A:C	eQTLcatalogue	Nedelec_2016_ge_macrophage_Listeria	ENSG00000225138	A	2.19191e-08	-0.549084	0.000109596	C	+	5	421426	CTD-2228K2.7	1
5:422178:A:G	eQTLcatalogue	Nedelec_2016_ge_macrophage_Listeria	ENSG00000221990	G	3.60444e-07	0.228428	0.00180222	A	-	5	422178	C5orf55	1
5:423169:C:T	eQTLcatalogue	Nedelec_2016_ge_macrophage_Listeria	ENSG00000221990	C	3.60616e-07	0.228115	0.00180308	T	-	5	423169	C5orf55	1
5:423595:C:T	eQTLcatalogue	Nedelec_2016_ge_macrophage_Listeria	ENSG00000221990	C	3.60427e-07	0.228121	0.00180214	T	-	5	423595	C5orf55	1
5:423671:C:T	eQTLcatalogue	Nedelec_2016_ge_macrophage_Listeria	ENSG00000221990	C	3.60427e-07	0.228121	0.00180214	T	-	5	423671	C5orf55	1
5:423906:A:G	eQTLcatalogue	Nedelec_2016_ge_macrophage_Listeria	ENSG00000221990	G	3.60427e-07	0.228121	0.00180214	A	-	5	423906	C5orf55	1
5:428236:A:C	eQTLcatalogue	Nedelec_2016_ge_macrophage_Listeria	ENSG00000221990	C	3.60616e-07	0.228115	0.00180308	A	-	5	428236	C5orf55	1
5:429124:C:G	eQTLcatalogue	Nedelec_2016_ge_macrophage_Listeria	ENSG00000221990	C	3.54321e-07	0.22831	0.0017716	G	-	5	429124	C5orf55	1
5:429818:C:G	eQTLcatalogue	Nedelec_2016_ge_macrophage_Listeria	ENSG00000221990	C	3.4684e-07	0.22854	0.0017342	G	-	5	429818	C5orf55	1
5:430059:A:G	eQTLcatalogue	Nedelec_2016_ge_macrophage_Listeria	ENSG00000221990	G	3.4594e-07	0.228567	0.0017297	A	-	5	430059	C5orf55	1
5:434722:C:G	eQTLcatalogue	Nedelec_2016_ge_macrophage_Listeria	ENSG00000221990	G	3.57628e-07	0.228207	0.00178814	C	-	5	434722	C5orf55	1
5:437542:C:T	eQTLcatalogue	Nedelec_2016_ge_macrophage_Listeria	ENSG00000221990	T	3.60616e-07	0.228115	0.00180308	C	-	5	437542	C5orf55	1
5:437586:A:G	eQTLcatalogue	Nedelec_2016_ge_macrophage_Listeria	ENSG00000221990	G	3.60616e-07	0.228115	0.00180308	A	-	5	437586	C5orf55	1
5:437667:A:G	eQTLcatalogue	Nedelec_2016_ge_macrophage_Listeria	ENSG00000221990	G	3.60616e-07	0.228115	0.00180308	A	-	5	437667	C5orf55	1
5:437862:C:G	eQTLcatalogue	Nedelec_2016_ge_macrophage_Listeria	ENSG00000221990	G	3.60616e-07	0.228115	0.00180308	C	-	5	437862	C5orf55	1
2:68385097:A:G	eQTLcatalogue	Nedelec_2016_ge_macrophage_Salmonella	ENSG00000221823	A	1.00605e-07	-0.179572	0.000503025	G	+	2	68385097	PPP3R1	1
2:68393144:A:T	eQTLcatalogue	Nedelec_2016_ge_macrophage_Salmonella	ENSG00000221823	T	1.62938e-07	-0.177003	0.00081469	A	+	2	68393144	PPP3R1	1
2:68394184:C:T	eQTLcatalogue	Nedelec_2016_ge_macrophage_Salmonella	ENSG00000221823	C	1.62459e-07	-0.176999	0.000812295	T	+	2	68394184	PPP3R1	1
2:68395631:A:G	eQTLcatalogue	Nedelec_2016_ge_macrophage_Salmonella	ENSG00000221823	G	1.58616e-07	-0.177112	0.00079308	A	+	2	68395631	PPP3R1	1
2:68398919:C:G	eQTLcatalogue	Nedelec_2016_ge_macrophage_Salmonella	ENSG00000221823	G	1.59631e-07	-0.176887	0.000798155	C	+	2	68398919	PPP3R1	1
2:68399190:C:T	eQTLcatalogue	Nedelec_2016_ge_macrophage_Salmonella	ENSG00000221823	C	1.59804e-07	-0.176832	0.00079902	T	+	2	68399190	PPP3R1	1
2:68402012:G:T	eQTLcatalogue	Nedelec_2016_ge_macrophage_Salmonella	ENSG00000221823	G	1.59726e-07	-0.176807	0.00079863	T	+	2	68402012	PPP3R1	1
2:68402830:C:G	eQTLcatalogue	Nedelec_2016_ge_macrophage_Salmonella	ENSG00000221823	G	1.59602e-07	-0.176847	0.00079801	C	+	2	68402830	PPP3R1	1
2:68410372:A:C	eQTLcatalogue	Nedelec_2016_ge_macrophage_Salmonella	ENSG00000221823	C	1.59726e-07	-0.176807	0.00079863	A	+	2	68410372	PPP3R1	1
2:68410660:G:T	eQTLcatalogue	Nedelec_2016_ge_macrophage_Salmonella	ENSG00000221823	T	1.59726e-07	-0.176807	0.00079863	G	+	2	68410660	PPP3R1	1
2:68411414:A:G	eQTLcatalogue	Nedelec_2016_ge_macrophage_Salmonella	ENSG00000221823	G	1.59726e-07	-0.176807	0.00079863	A	+	2	68411414	PPP3R1	1
2:68418868:A:T	eQTLcatalogue	Nedelec_2016_ge_macrophage_Salmonella	ENSG00000221823	A	1.5981e-07	-0.176805	0.00079905	T	+	2	68418868	PPP3R1	1
2:68419487:A:G	eQTLcatalogue	Nedelec_2016_ge_macrophage_Salmonella	ENSG00000221823	G	1.59673e-07	-0.176832	0.000798365	A	+	2	68419487	PPP3R1	1
2:68420070:G:T	eQTLcatalogue	Nedelec_2016_ge_macrophage_Salmonella	ENSG00000221823	G	1.59531e-07	-0.176849	0.000797655	T	+	2	68420070	PPP3R1	1
2:68421049:A:G	eQTLcatalogue	Nedelec_2016_ge_macrophage_Salmonella	ENSG00000221823	G	1.59584e-07	-0.17685	0.00079792	A	+	2	68421049	PPP3R1	1
2:68422771:A:G	eQTLcatalogue	Nedelec_2016_ge_macrophage_Salmonella	ENSG00000221823	G	1.59434e-07	-0.17686	0.00079717	A	+	2	68422771	PPP3R1	1
2:68423530:A:G	eQTLcatalogue	Nedelec_2016_ge_macrophage_Salmonella	ENSG00000221823	G	1.59387e-07	-0.176877	0.000796935	A	+	2	68423530	PPP3R1	1
2:68430925:C:T	eQTLcatalogue	Nedelec_2016_ge_macrophage_Salmonella	ENSG00000221823	C	1.59573e-07	-0.176849	0.000797865	T	+	2	68430925	PPP3R1	1
2:68431259:A:G	eQTLcatalogue	Nedelec_2016_ge_macrophage_Salmonella	ENSG00000221823	G	1.59531e-07	-0.176849	0.000797655	A	+	2	68431259	PPP3R1	1
2:68433831:A:G	eQTLcatalogue	Nedelec_2016_ge_macrophage_Salmonella	ENSG00000221823	G	1.59726e-07	-0.176807	0.00079863	A	+	2	68433831	PPP3R1	1
2:68435431:C:G	eQTLcatalogue	Nedelec_2016_ge_macrophage_Salmonella	ENSG00000221823	C	1.62909e-07	-0.176724	0.000814545	G	+	2	68435431	PPP3R1	1
2:68438614:C:T	eQTLcatalogue	Nedelec_2016_ge_macrophage_Salmonella	ENSG00000221823	C	1.59673e-07	-0.176832	0.000798365	T	+	2	68438614	PPP3R1	1
2:68439960:C:T	eQTLcatalogue	Nedelec_2016_ge_macrophage_Salmonella	ENSG00000221823	C	2.8356e-07	-0.171389	0.0014178	T	+	2	68439960	PPP3R1	1
2:68443651:A:G	eQTLcatalogue	Nedelec_2016_ge_macrophage_Salmonella	ENSG00000221823	A	2.83452e-07	-0.171447	0.00141726	G	+	2	68443651	PPP3R1	1
2:68443835:A:T	eQTLcatalogue	Nedelec_2016_ge_macrophage_Salmonella	ENSG00000221823	A	2.8416e-07	-0.171411	0.0014208	T	+	2	68443835	PPP3R1	1
2:68446936:C:T	eQTLcatalogue	Nedelec_2016_ge_macrophage_Salmonella	ENSG00000221823	C	1.56614e-07	-0.177037	0.00078307	T	+	2	68446936	PPP3R1	1
2:68457573:C:T	eQTLcatalogue	Nedelec_2016_ge_macrophage_Salmonella	ENSG00000221823	C	1.59726e-07	-0.176807	0.00079863	T	+	2	68457573	PPP3R1	1
2:68457854:A:G	eQTLcatalogue	Nedelec_2016_ge_macrophage_Salmonella	ENSG00000221823	A	1.59933e-07	-0.176801	0.000799665	G	+	2	68457854	PPP3R1	1
2:68463612:A:G	eQTLcatalogue	Nedelec_2016_ge_macrophage_Salmonella	ENSG00000221823	G	1.59587e-07	-0.176854	0.000797935	A	+	2	68463612	PPP3R1	1
2:68467910:A:C	eQTLcatalogue	Nedelec_2016_ge_macrophage_Salmonella	ENSG00000221823	A	1.59189e-07	-0.176867	0.000795945	C	+	2	68467910	PPP3R1	1
2:68475595:A:C	eQTLcatalogue	Nedelec_2016_ge_macrophage_Salmonella	ENSG00000221823	C	1.60366e-07	-0.176835	0.00080183	A	+	2	68475595	PPP3R1	1
2:68477248:C:T	eQTLcatalogue	Nedelec_2016_ge_macrophage_Salmonella	ENSG00000221823	T	1.6038e-07	-0.176836	0.0008019	C	+	2	68477248	PPP3R1	1
2:68478919:A:G	eQTLcatalogue	Nedelec_2016_ge_macrophage_Salmonella	ENSG00000221823	A	2.35138e-07	-0.175064	0.00117569	G	+	2	68478919	PPP3R1	1
5:418093:A:G	eQTLcatalogue	Nedelec_2016_ge_macrophage_Salmonella	ENSG00000225138	A	4.69257e-06	-0.50101	0.0234628	G	+	5	418093	CTD-2228K2.7	1
5:421426:A:C	eQTLcatalogue	Nedelec_2016_ge_macrophage_Salmonella	ENSG00000225138	A	3.81871e-06	-0.518656	0.0190935	C	+	5	421426	CTD-2228K2.7	1
5:416118:A:G	eQTLcatalogue	Quach_2016_ge_monocyte_LPS	ENSG00000180104	G	2.67172e-08	0.109119	0.000133586	A	-	5	416118	EXOC3	1
5:416672:A:G	eQTLcatalogue	Quach_2016_ge_monocyte_LPS	ENSG00000180104	G	3.03782e-08	0.108694	0.000151891	A	-	5	416672	EXOC3	1
5:418494:A:G	eQTLcatalogue	Quach_2016_ge_monocyte_LPS	ENSG00000180104	A	2.98653e-08	0.109044	0.000149327	G	-	5	418494	EXOC3	1
5:421403:A:G	eQTLcatalogue	Quach_2016_ge_monocyte_LPS	ENSG00000180104	G	9.9202e-09	0.124669	4.9601e-05	A	-	5	421403	EXOC3	1
5:421455:G:T	eQTLcatalogue	Quach_2016_ge_monocyte_LPS	ENSG00000180104	G	8.91125e-09	0.123391	4.45563e-05	T	-	5	421455	EXOC3	1
5:422178:A:G	eQTLcatalogue	Quach_2016_ge_monocyte_LPS	ENSG00000180104	G	3.13375e-08	0.100114	0.000156687	A	-	5	422178	EXOC3	1
5:423169:C:T	eQTLcatalogue	Quach_2016_ge_monocyte_LPS	ENSG00000180104	C	5.70285e-08	0.0926078	0.000285143	T	-	5	423169	EXOC3	1
5:423595:C:T	eQTLcatalogue	Quach_2016_ge_monocyte_LPS	ENSG00000180104	C	4.86146e-08	0.0927735	0.000243073	T	-	5	423595	EXOC3	1
5:423671:C:T	eQTLcatalogue	Quach_2016_ge_monocyte_LPS	ENSG00000180104	C	4.62025e-08	0.092779	0.000231013	T	-	5	423671	EXOC3	1
5:423906:A:G	eQTLcatalogue	Quach_2016_ge_monocyte_LPS	ENSG00000180104	G	4.56211e-08	0.09277	0.000228105	A	-	5	423906	EXOC3	1
5:428236:A:C	eQTLcatalogue	Quach_2016_ge_monocyte_LPS	ENSG00000180104	C	4.5588e-08	0.0927711	0.00022794	A	-	5	428236	EXOC3	1
5:429124:C:G	eQTLcatalogue	Quach_2016_ge_monocyte_LPS	ENSG00000180104	C	4.07689e-08	0.0929431	0.000203845	G	-	5	429124	EXOC3	1
5:429818:C:G	eQTLcatalogue	Quach_2016_ge_monocyte_LPS	ENSG00000180104	C	3.53078e-08	0.0931273	0.000176539	G	-	5	429818	EXOC3	1
5:430059:A:G	eQTLcatalogue	Quach_2016_ge_monocyte_LPS	ENSG00000180104	G	3.59847e-08	0.0930369	0.000179923	A	-	5	430059	EXOC3	1
5:434722:C:G	eQTLcatalogue	Quach_2016_ge_monocyte_LPS	ENSG00000180104	G	3.71152e-08	0.0923228	0.000185576	C	-	5	434722	EXOC3	1
5:437542:C:T	eQTLcatalogue	Quach_2016_ge_monocyte_LPS	ENSG00000180104	T	4.56211e-08	0.09277	0.000228105	C	-	5	437542	EXOC3	1
5:437586:A:G	eQTLcatalogue	Quach_2016_ge_monocyte_LPS	ENSG00000180104	G	4.56211e-08	0.09277	0.000228105	A	-	5	437586	EXOC3	1
5:437667:A:G	eQTLcatalogue	Quach_2016_ge_monocyte_LPS	ENSG00000180104	G	4.56211e-08	0.09277	0.000228105	A	-	5	437667	EXOC3	1
5:437862:C:G	eQTLcatalogue	Quach_2016_ge_monocyte_LPS	ENSG00000180104	G	4.56211e-08	0.09277	0.000228105	C	-	5	437862	EXOC3	1
5:416118:A:G	eQTLcatalogue	Quach_2016_ge_monocyte_Pam3CSK4	ENSG00000180104	G	5.13936e-10	0.104499	2.56968e-06	A	-	5	416118	EXOC3	1
5:416672:A:G	eQTLcatalogue	Quach_2016_ge_monocyte_Pam3CSK4	ENSG00000180104	G	3.68701e-10	0.105276	1.8435e-06	A	-	5	416672	EXOC3	1
5:418494:A:G	eQTLcatalogue	Quach_2016_ge_monocyte_Pam3CSK4	ENSG00000180104	A	2.96569e-10	0.106066	1.48285e-06	G	-	5	418494	EXOC3	1
5:421403:A:G	eQTLcatalogue	Quach_2016_ge_monocyte_Pam3CSK4	ENSG00000180104	G	8.68686e-11	0.120648	4.34343e-07	A	-	5	421403	EXOC3	1
5:421455:G:T	eQTLcatalogue	Quach_2016_ge_monocyte_Pam3CSK4	ENSG00000180104	G	6.44185e-11	0.119855	3.22092e-07	T	-	5	421455	EXOC3	1
5:422178:A:G	eQTLcatalogue	Quach_2016_ge_monocyte_Pam3CSK4	ENSG00000180104	G	4.8201e-11	0.101918	2.41005e-07	A	-	5	422178	EXOC3	1
5:423169:C:T	eQTLcatalogue	Quach_2016_ge_monocyte_Pam3CSK4	ENSG00000180104	C	9.12037e-11	0.0948248	4.56018e-07	T	-	5	423169	EXOC3	1
5:423595:C:T	eQTLcatalogue	Quach_2016_ge_monocyte_Pam3CSK4	ENSG00000180104	C	8.02314e-11	0.0947986	4.01157e-07	T	-	5	423595	EXOC3	1
5:423671:C:T	eQTLcatalogue	Quach_2016_ge_monocyte_Pam3CSK4	ENSG00000180104	C	7.76021e-11	0.0947306	3.88011e-07	T	-	5	423671	EXOC3	1
5:423906:A:G	eQTLcatalogue	Quach_2016_ge_monocyte_Pam3CSK4	ENSG00000180104	G	7.7077e-11	0.0947006	3.85385e-07	A	-	5	423906	EXOC3	1
5:428236:A:C	eQTLcatalogue	Quach_2016_ge_monocyte_Pam3CSK4	ENSG00000180104	C	7.70278e-11	0.094701	3.85139e-07	A	-	5	428236	EXOC3	1
5:429124:C:G	eQTLcatalogue	Quach_2016_ge_monocyte_Pam3CSK4	ENSG00000180104	C	6.91096e-11	0.094779	3.45548e-07	G	-	5	429124	EXOC3	1
5:429818:C:G	eQTLcatalogue	Quach_2016_ge_monocyte_Pam3CSK4	ENSG00000180104	C	6.04027e-11	0.0948378	3.02013e-07	G	-	5	429818	EXOC3	1
5:430059:A:G	eQTLcatalogue	Quach_2016_ge_monocyte_Pam3CSK4	ENSG00000180104	G	6.18496e-11	0.0947549	3.09248e-07	A	-	5	430059	EXOC3	1
5:434722:C:G	eQTLcatalogue	Quach_2016_ge_monocyte_Pam3CSK4	ENSG00000180104	G	7.42924e-11	0.0937805	3.71462e-07	C	-	5	434722	EXOC3	1
5:436981:A:G	eQTLcatalogue	Quach_2016_ge_monocyte_Pam3CSK4	ENSG00000180104	A	3.83095e-07	0.0703955	0.00191548	G	-	5	436981	EXOC3	1
5:437542:C:T	eQTLcatalogue	Quach_2016_ge_monocyte_Pam3CSK4	ENSG00000180104	T	7.7077e-11	0.0947006	3.85385e-07	C	-	5	437542	EXOC3	1
5:437586:A:G	eQTLcatalogue	Quach_2016_ge_monocyte_Pam3CSK4	ENSG00000180104	G	7.7077e-11	0.0947006	3.85385e-07	A	-	5	437586	EXOC3	1
5:437667:A:G	eQTLcatalogue	Quach_2016_ge_monocyte_Pam3CSK4	ENSG00000180104	G	7.7077e-11	0.0947006	3.85385e-07	A	-	5	437667	EXOC3	1
5:437862:C:G	eQTLcatalogue	Quach_2016_ge_monocyte_Pam3CSK4	ENSG00000180104	G	7.7077e-11	0.0947006	3.85385e-07	C	-	5	437862	EXOC3	1
5:416118:A:G	eQTLcatalogue	Quach_2016_ge_monocyte_R848	ENSG00000180104	G	1.42098e-08	0.082084	7.1049e-05	A	-	5	416118	EXOC3	1
5:416672:A:G	eQTLcatalogue	Quach_2016_ge_monocyte_R848	ENSG00000180104	G	8.1488e-09	0.0833303	4.0744e-05	A	-	5	416672	EXOC3	1
5:418494:A:G	eQTLcatalogue	Quach_2016_ge_monocyte_R848	ENSG00000180104	A	6.56349e-09	0.0840475	3.28174e-05	G	-	5	418494	EXOC3	1
5:421403:A:G	eQTLcatalogue	Quach_2016_ge_monocyte_R848	ENSG00000180104	G	7.46741e-09	0.0931869	3.73371e-05	A	-	5	421403	EXOC3	1
5:421455:G:T	eQTLcatalogue	Quach_2016_ge_monocyte_R848	ENSG00000180104	G	5.26897e-09	0.092896	2.63449e-05	T	-	5	421455	EXOC3	1
5:422178:A:G	eQTLcatalogue	Quach_2016_ge_monocyte_R848	ENSG00000180104	G	9.17374e-09	0.076489	4.58687e-05	A	-	5	422178	EXOC3	1
5:423169:C:T	eQTLcatalogue	Quach_2016_ge_monocyte_R848	ENSG00000180104	C	1.41856e-08	0.0710643	7.0928e-05	T	-	5	423169	EXOC3	1
5:423595:C:T	eQTLcatalogue	Quach_2016_ge_monocyte_R848	ENSG00000180104	C	1.00463e-08	0.071515	5.02315e-05	T	-	5	423595	EXOC3	1
5:423671:C:T	eQTLcatalogue	Quach_2016_ge_monocyte_R848	ENSG00000180104	C	8.8605e-09	0.0716509	4.43025e-05	T	-	5	423671	EXOC3	1
5:423906:A:G	eQTLcatalogue	Quach_2016_ge_monocyte_R848	ENSG00000180104	G	8.57334e-09	0.0716795	4.28667e-05	A	-	5	423906	EXOC3	1
5:428236:A:C	eQTLcatalogue	Quach_2016_ge_monocyte_R848	ENSG00000180104	C	8.57359e-09	0.0716788	4.2868e-05	A	-	5	428236	EXOC3	1
5:429124:C:G	eQTLcatalogue	Quach_2016_ge_monocyte_R848	ENSG00000180104	C	8.44534e-09	0.0716002	4.22267e-05	G	-	5	429124	EXOC3	1
5:429818:C:G	eQTLcatalogue	Quach_2016_ge_monocyte_R848	ENSG00000180104	C	8.2953e-09	0.0714727	4.14765e-05	G	-	5	429818	EXOC3	1
5:430059:A:G	eQTLcatalogue	Quach_2016_ge_monocyte_R848	ENSG00000180104	G	8.49528e-09	0.0713978	4.24764e-05	A	-	5	430059	EXOC3	1
5:434722:C:G	eQTLcatalogue	Quach_2016_ge_monocyte_R848	ENSG00000180104	G	1.07698e-08	0.0704495	5.3849e-05	C	-	5	434722	EXOC3	1
5:436981:A:G	eQTLcatalogue	Quach_2016_ge_monocyte_R848	ENSG00000180104	A	2.32574e-06	0.0554078	0.0116287	G	-	5	436981	EXOC3	1
5:437542:C:T	eQTLcatalogue	Quach_2016_ge_monocyte_R848	ENSG00000180104	T	8.57334e-09	0.0716795	4.28667e-05	C	-	5	437542	EXOC3	1
5:437586:A:G	eQTLcatalogue	Quach_2016_ge_monocyte_R848	ENSG00000180104	G	8.57334e-09	0.0716795	4.28667e-05	A	-	5	437586	EXOC3	1
5:437667:A:G	eQTLcatalogue	Quach_2016_ge_monocyte_R848	ENSG00000180104	G	8.57334e-09	0.0716795	4.28667e-05	A	-	5	437667	EXOC3	1
5:437862:C:G	eQTLcatalogue	Quach_2016_ge_monocyte_R848	ENSG00000180104	G	8.57334e-09	0.0716795	4.28667e-05	C	-	5	437862	EXOC3	1
5:416118:A:G	eQTLcatalogue	TwinsUK_ge_blood	ENSG00000180104	G	2.71859e-17	-0.106496	1.3593e-13	A	+	5	416118	EXOC3	1
5:416118:A:G	eQTLcatalogue	TwinsUK_ge_blood	ENSG00000225138	G	7.72569e-18	0.392383	3.86284e-14	A	-	5	416118	CTD-2228K2.7	1
5:416672:A:G	eQTLcatalogue	TwinsUK_ge_blood	ENSG00000180104	G	7.15483e-17	-0.105531	3.57742e-13	A	+	5	416672	EXOC3	1
5:416672:A:G	eQTLcatalogue	TwinsUK_ge_blood	ENSG00000225138	G	1.68497e-17	0.389826	8.42485e-14	A	-	5	416672	CTD-2228K2.7	1
5:418093:A:G	eQTLcatalogue	TwinsUK_ge_blood	ENSG00000180104	A	1.92973e-10	-0.119706	9.64865e-07	G	+	5	418093	EXOC3	1
5:418494:A:G	eQTLcatalogue	TwinsUK_ge_blood	ENSG00000180104	A	3.95639e-18	-0.108503	1.9782e-14	G	+	5	418494	EXOC3	1
5:418494:A:G	eQTLcatalogue	TwinsUK_ge_blood	ENSG00000225138	A	2.7544e-18	0.395727	1.3772e-14	G	-	5	418494	CTD-2228K2.7	1
5:421193:C:G	eQTLcatalogue	TwinsUK_ge_blood	ENSG00000180104	G	2.26907e-14	-0.0955114	1.13454e-10	C	+	5	421193	EXOC3	1
5:421193:C:G	eQTLcatalogue	TwinsUK_ge_blood	ENSG00000225138	G	3.7659e-14	0.34445	1.88295e-10	C	-	5	421193	CTD-2228K2.7	1
5:421403:A:G	eQTLcatalogue	TwinsUK_ge_blood	ENSG00000180104	G	3.01739e-18	-0.107855	1.5087e-14	A	+	5	421403	EXOC3	1
5:421403:A:G	eQTLcatalogue	TwinsUK_ge_blood	ENSG00000225138	G	4.65483e-17	0.38014	2.32741e-13	A	-	5	421403	CTD-2228K2.7	1
5:421426:A:C	eQTLcatalogue	TwinsUK_ge_blood	ENSG00000180104	A	2.45946e-10	-0.115867	1.22973e-06	C	+	5	421426	EXOC3	1
5:421455:G:T	eQTLcatalogue	TwinsUK_ge_blood	ENSG00000180104	G	3.01739e-18	-0.107855	1.5087e-14	T	+	5	421455	EXOC3	1
5:421455:G:T	eQTLcatalogue	TwinsUK_ge_blood	ENSG00000225138	G	4.65483e-17	0.38014	2.32741e-13	T	-	5	421455	CTD-2228K2.7	1
5:422178:A:G	eQTLcatalogue	TwinsUK_ge_blood	ENSG00000180104	G	5.91304e-27	-0.12068	2.95652e-23	A	+	5	422178	EXOC3	1
5:422178:A:G	eQTLcatalogue	TwinsUK_ge_blood	ENSG00000225138	G	7.51465e-12	0.303434	3.75732e-08	A	-	5	422178	CTD-2228K2.7	1
5:423169:C:T	eQTLcatalogue	TwinsUK_ge_blood	ENSG00000180104	C	5.91304e-27	-0.12068	2.95652e-23	T	+	5	423169	EXOC3	1
5:423169:C:T	eQTLcatalogue	TwinsUK_ge_blood	ENSG00000225138	C	7.51465e-12	0.303434	3.75732e-08	T	-	5	423169	CTD-2228K2.7	1
5:423595:C:T	eQTLcatalogue	TwinsUK_ge_blood	ENSG00000180104	C	5.91304e-27	-0.12068	2.95652e-23	T	+	5	423595	EXOC3	1
5:423595:C:T	eQTLcatalogue	TwinsUK_ge_blood	ENSG00000225138	C	7.51465e-12	0.303434	3.75732e-08	T	-	5	423595	CTD-2228K2.7	1
5:423671:C:T	eQTLcatalogue	TwinsUK_ge_blood	ENSG00000180104	C	5.91304e-27	-0.12068	2.95652e-23	T	+	5	423671	EXOC3	1
5:423671:C:T	eQTLcatalogue	TwinsUK_ge_blood	ENSG00000225138	C	7.51465e-12	0.303434	3.75732e-08	T	-	5	423671	CTD-2228K2.7	1
5:423906:A:G	eQTLcatalogue	TwinsUK_ge_blood	ENSG00000180104	G	5.91304e-27	-0.12068	2.95652e-23	A	+	5	423906	EXOC3	1
5:423906:A:G	eQTLcatalogue	TwinsUK_ge_blood	ENSG00000225138	G	7.51465e-12	0.303434	3.75732e-08	A	-	5	423906	CTD-2228K2.7	1
5:428236:A:C	eQTLcatalogue	TwinsUK_ge_blood	ENSG00000180104	C	5.91304e-27	-0.12068	2.95652e-23	A	+	5	428236	EXOC3	1
5:428236:A:C	eQTLcatalogue	TwinsUK_ge_blood	ENSG00000225138	C	7.51465e-12	0.303434	3.75732e-08	A	-	5	428236	CTD-2228K2.7	1
5:429124:C:G	eQTLcatalogue	TwinsUK_ge_blood	ENSG00000180104	C	5.91304e-27	-0.12068	2.95652e-23	G	+	5	429124	EXOC3	1
5:429124:C:G	eQTLcatalogue	TwinsUK_ge_blood	ENSG00000225138	C	7.51465e-12	0.303434	3.75732e-08	G	-	5	429124	CTD-2228K2.7	1
5:429818:C:G	eQTLcatalogue	TwinsUK_ge_blood	ENSG00000180104	C	5.91304e-27	-0.12068	2.95652e-23	G	+	5	429818	EXOC3	1
5:429818:C:G	eQTLcatalogue	TwinsUK_ge_blood	ENSG00000225138	C	7.51465e-12	0.303434	3.75732e-08	G	-	5	429818	CTD-2228K2.7	1
5:430059:A:G	eQTLcatalogue	TwinsUK_ge_blood	ENSG00000180104	G	5.91304e-27	-0.12068	2.95652e-23	A	+	5	430059	EXOC3	1
5:430059:A:G	eQTLcatalogue	TwinsUK_ge_blood	ENSG00000225138	G	7.51465e-12	0.303434	3.75732e-08	A	-	5	430059	CTD-2228K2.7	1
5:430217:C:T	eQTLcatalogue	TwinsUK_ge_blood	ENSG00000180104	C	4.0605e-20	-0.104021	2.03025e-16	T	+	5	430217	EXOC3	1
5:430217:C:T	eQTLcatalogue	TwinsUK_ge_blood	ENSG00000225138	C	1.49922e-15	0.336556	7.4961e-12	T	-	5	430217	CTD-2228K2.7	1
5:434722:C:G	eQTLcatalogue	TwinsUK_ge_blood	ENSG00000180104	G	1.28799e-27	-0.12267	6.43995e-24	C	+	5	434722	EXOC3	1
5:434722:C:G	eQTLcatalogue	TwinsUK_ge_blood	ENSG00000225138	G	1.15179e-11	0.303135	5.75895e-08	C	-	5	434722	CTD-2228K2.7	1
5:436981:A:G	eQTLcatalogue	TwinsUK_ge_blood	ENSG00000180104	A	6.88154e-23	-0.112005	3.44077e-19	G	+	5	436981	EXOC3	1
5:436981:A:G	eQTLcatalogue	TwinsUK_ge_blood	ENSG00000225138	A	2.91829e-10	0.279296	1.45915e-06	G	-	5	436981	CTD-2228K2.7	1
5:437542:C:T	eQTLcatalogue	TwinsUK_ge_blood	ENSG00000180104	T	1.28799e-27	-0.12267	6.43995e-24	C	+	5	437542	EXOC3	1
5:437542:C:T	eQTLcatalogue	TwinsUK_ge_blood	ENSG00000225138	T	1.15179e-11	0.303135	5.75895e-08	C	-	5	437542	CTD-2228K2.7	1
5:437586:A:G	eQTLcatalogue	TwinsUK_ge_blood	ENSG00000180104	G	1.28799e-27	-0.12267	6.43995e-24	A	+	5	437586	EXOC3	1
5:437586:A:G	eQTLcatalogue	TwinsUK_ge_blood	ENSG00000225138	G	1.15179e-11	0.303135	5.75895e-08	A	-	5	437586	CTD-2228K2.7	1
5:437667:A:G	eQTLcatalogue	TwinsUK_ge_blood	ENSG00000180104	G	1.28799e-27	-0.12267	6.43995e-24	A	+	5	437667	EXOC3	1
5:437667:A:G	eQTLcatalogue	TwinsUK_ge_blood	ENSG00000225138	G	1.15179e-11	0.303135	5.75895e-08	A	-	5	437667	CTD-2228K2.7	1
5:437862:C:G	eQTLcatalogue	TwinsUK_ge_blood	ENSG00000180104	G	1.28799e-27	-0.12267	6.43995e-24	C	+	5	437862	EXOC3	1
5:437862:C:G	eQTLcatalogue	TwinsUK_ge_blood	ENSG00000225138	G	1.15179e-11	0.303135	5.75895e-08	C	-	5	437862	CTD-2228K2.7	1
2:68385097:A:G	eQTLcatalogue	TwinsUK_ge_fat	ENSG00000115946	A	1.51463e-06	0.0730018	0.00757315	G	-	2	68385097	PNO1	1
2:68393144:A:T	eQTLcatalogue	TwinsUK_ge_fat	ENSG00000115946	T	1.72624e-06	0.0727531	0.0086312	A	-	2	68393144	PNO1	1
2:68394184:C:T	eQTLcatalogue	TwinsUK_ge_fat	ENSG00000115946	C	1.72624e-06	0.0727531	0.0086312	T	-	2	68394184	PNO1	1
2:68395631:A:G	eQTLcatalogue	TwinsUK_ge_fat	ENSG00000115946	G	1.7188e-06	0.0726828	0.008594	A	-	2	68395631	PNO1	1
2:68398919:C:G	eQTLcatalogue	TwinsUK_ge_fat	ENSG00000115946	G	1.7188e-06	0.0726828	0.008594	C	-	2	68398919	PNO1	1
2:68399190:C:T	eQTLcatalogue	TwinsUK_ge_fat	ENSG00000115946	C	1.7188e-06	0.0726828	0.008594	T	-	2	68399190	PNO1	1
2:68402012:G:T	eQTLcatalogue	TwinsUK_ge_fat	ENSG00000115946	G	1.7188e-06	0.0726828	0.008594	T	-	2	68402012	PNO1	1
2:68410372:A:C	eQTLcatalogue	TwinsUK_ge_fat	ENSG00000115946	C	1.7188e-06	0.0726828	0.008594	A	-	2	68410372	PNO1	1
2:68410660:G:T	eQTLcatalogue	TwinsUK_ge_fat	ENSG00000115946	T	1.7188e-06	0.0726828	0.008594	G	-	2	68410660	PNO1	1
2:68411414:A:G	eQTLcatalogue	TwinsUK_ge_fat	ENSG00000115946	G	1.7188e-06	0.0726828	0.008594	A	-	2	68411414	PNO1	1
2:68418868:A:T	eQTLcatalogue	TwinsUK_ge_fat	ENSG00000115946	A	1.7188e-06	0.0726828	0.008594	T	-	2	68418868	PNO1	1
2:68419487:A:G	eQTLcatalogue	TwinsUK_ge_fat	ENSG00000115946	G	1.7188e-06	0.0726828	0.008594	A	-	2	68419487	PNO1	1
2:68420070:G:T	eQTLcatalogue	TwinsUK_ge_fat	ENSG00000115946	G	1.7188e-06	0.0726828	0.008594	T	-	2	68420070	PNO1	1
2:68421049:A:G	eQTLcatalogue	TwinsUK_ge_fat	ENSG00000115946	G	1.7188e-06	0.0726828	0.008594	A	-	2	68421049	PNO1	1
2:68422771:A:G	eQTLcatalogue	TwinsUK_ge_fat	ENSG00000115946	G	1.8168e-06	0.0724369	0.009084	A	-	2	68422771	PNO1	1
2:68423530:A:G	eQTLcatalogue	TwinsUK_ge_fat	ENSG00000115946	G	1.8168e-06	0.0724369	0.009084	A	-	2	68423530	PNO1	1
2:68430925:C:T	eQTLcatalogue	TwinsUK_ge_fat	ENSG00000115946	C	1.8168e-06	0.0724369	0.009084	T	-	2	68430925	PNO1	1
2:68431259:A:G	eQTLcatalogue	TwinsUK_ge_fat	ENSG00000115946	G	1.8168e-06	0.0724369	0.009084	A	-	2	68431259	PNO1	1
2:68433831:A:G	eQTLcatalogue	TwinsUK_ge_fat	ENSG00000115946	G	1.8168e-06	0.0724369	0.009084	A	-	2	68433831	PNO1	1
2:68435431:C:G	eQTLcatalogue	TwinsUK_ge_fat	ENSG00000115946	C	1.8168e-06	0.0724369	0.009084	G	-	2	68435431	PNO1	1
2:68438614:C:T	eQTLcatalogue	TwinsUK_ge_fat	ENSG00000115946	C	1.8168e-06	0.0724369	0.009084	T	-	2	68438614	PNO1	1
2:68439960:C:T	eQTLcatalogue	TwinsUK_ge_fat	ENSG00000115946	C	1.8168e-06	0.0724369	0.009084	T	-	2	68439960	PNO1	1
2:68443651:A:G	eQTLcatalogue	TwinsUK_ge_fat	ENSG00000115946	A	1.8168e-06	0.0724369	0.009084	G	-	2	68443651	PNO1	1
2:68443835:A:T	eQTLcatalogue	TwinsUK_ge_fat	ENSG00000115946	A	1.8168e-06	0.0724369	0.009084	T	-	2	68443835	PNO1	1
2:68446936:C:T	eQTLcatalogue	TwinsUK_ge_fat	ENSG00000115946	C	1.74091e-06	0.072645	0.00870455	T	-	2	68446936	PNO1	1
2:68457573:C:T	eQTLcatalogue	TwinsUK_ge_fat	ENSG00000115946	C	2.75099e-06	0.0713574	0.0137549	T	-	2	68457573	PNO1	1
2:68457854:A:G	eQTLcatalogue	TwinsUK_ge_fat	ENSG00000115946	A	2.75099e-06	0.0713574	0.0137549	G	-	2	68457854	PNO1	1
2:68463612:A:G	eQTLcatalogue	TwinsUK_ge_fat	ENSG00000115946	G	2.75099e-06	0.0713574	0.0137549	A	-	2	68463612	PNO1	1
2:68467910:A:C	eQTLcatalogue	TwinsUK_ge_fat	ENSG00000115946	A	2.75099e-06	0.0713574	0.0137549	C	-	2	68467910	PNO1	1
2:68475595:A:C	eQTLcatalogue	TwinsUK_ge_fat	ENSG00000115946	C	2.75099e-06	0.0713574	0.0137549	A	-	2	68475595	PNO1	1
2:68477248:C:T	eQTLcatalogue	TwinsUK_ge_fat	ENSG00000115946	T	2.75099e-06	0.0713574	0.0137549	C	-	2	68477248	PNO1	1
2:68478919:A:G	eQTLcatalogue	TwinsUK_ge_fat	ENSG00000115946	A	2.75099e-06	0.0713574	0.0137549	G	-	2	68478919	PNO1	1
5:416118:A:G	eQTLcatalogue	TwinsUK_ge_fat	ENSG00000180104	G	3.44312e-18	-0.0891801	1.72156e-14	A	+	5	416118	EXOC3	1
5:416118:A:G	eQTLcatalogue	TwinsUK_ge_fat	ENSG00000221990	G	2.50803e-11	0.164269	1.25402e-07	A	-	5	416118	C5orf55	1
5:416118:A:G	eQTLcatalogue	TwinsUK_ge_fat	ENSG00000225138	G	1.42401e-10	0.246111	7.12005e-07	A	-	5	416118	CTD-2228K2.7	1
5:416672:A:G	eQTLcatalogue	TwinsUK_ge_fat	ENSG00000180104	G	1.08711e-18	-0.0904542	5.43555e-15	A	+	5	416672	EXOC3	1
5:416672:A:G	eQTLcatalogue	TwinsUK_ge_fat	ENSG00000221990	G	4.58666e-12	0.170069	2.29333e-08	A	-	5	416672	C5orf55	1
5:416672:A:G	eQTLcatalogue	TwinsUK_ge_fat	ENSG00000225138	G	1.00897e-10	0.248209	5.04485e-07	A	-	5	416672	CTD-2228K2.7	1
5:418093:A:G	eQTLcatalogue	TwinsUK_ge_fat	ENSG00000066230	A	2.29502e-08	-0.29259	0.000114751	G	+	5	418093	SLC9A3	1
5:418093:A:G	eQTLcatalogue	TwinsUK_ge_fat	ENSG00000180104	A	9.81838e-16	-0.112925	4.90919e-12	G	+	5	418093	EXOC3	1
5:418093:A:G	eQTLcatalogue	TwinsUK_ge_fat	ENSG00000221990	A	1.94816e-06	0.161802	0.0097408	G	-	5	418093	C5orf55	1
5:418093:A:G	eQTLcatalogue	TwinsUK_ge_fat	ENSG00000225138	A	2.17268e-12	-0.36503	1.08634e-08	G	+	5	418093	CTD-2228K2.7	1
5:418494:A:G	eQTLcatalogue	TwinsUK_ge_fat	ENSG00000180104	A	6.26522e-20	-0.0930785	3.13261e-16	G	+	5	418494	EXOC3	1
5:418494:A:G	eQTLcatalogue	TwinsUK_ge_fat	ENSG00000221990	A	1.26491e-12	0.173737	6.32455e-09	G	-	5	418494	C5orf55	1
5:418494:A:G	eQTLcatalogue	TwinsUK_ge_fat	ENSG00000225138	A	1.78985e-11	0.256787	8.94925e-08	G	-	5	418494	CTD-2228K2.7	1
5:421193:C:G	eQTLcatalogue	TwinsUK_ge_fat	ENSG00000066230	G	4.66257e-06	0.171676	0.0233128	C	-	5	421193	SLC9A3	1
5:421193:C:G	eQTLcatalogue	TwinsUK_ge_fat	ENSG00000180104	G	1.38683e-16	-0.0824773	6.93415e-13	C	+	5	421193	EXOC3	1
5:421193:C:G	eQTLcatalogue	TwinsUK_ge_fat	ENSG00000221990	G	2.1313e-10	0.151832	1.06565e-06	C	-	5	421193	C5orf55	1
5:421193:C:G	eQTLcatalogue	TwinsUK_ge_fat	ENSG00000225138	G	1.0366e-10	0.240033	5.183e-07	C	-	5	421193	CTD-2228K2.7	1
5:421403:A:G	eQTLcatalogue	TwinsUK_ge_fat	ENSG00000180104	G	3.35593e-20	-0.0932034	1.67796e-16	A	+	5	421403	EXOC3	1
5:421403:A:G	eQTLcatalogue	TwinsUK_ge_fat	ENSG00000221990	G	1.25027e-12	0.172872	6.25135e-09	A	-	5	421403	C5orf55	1
5:421403:A:G	eQTLcatalogue	TwinsUK_ge_fat	ENSG00000225138	G	5.64918e-11	0.249376	2.82459e-07	A	-	5	421403	CTD-2228K2.7	1
5:421426:A:C	eQTLcatalogue	TwinsUK_ge_fat	ENSG00000066230	A	7.20527e-09	-0.298417	3.60264e-05	C	+	5	421426	SLC9A3	1
5:421426:A:C	eQTLcatalogue	TwinsUK_ge_fat	ENSG00000180104	A	7.18289e-16	-0.111884	3.59144e-12	C	+	5	421426	EXOC3	1
5:421426:A:C	eQTLcatalogue	TwinsUK_ge_fat	ENSG00000221990	A	2.08583e-06	0.159164	0.0104291	C	-	5	421426	C5orf55	1
5:421426:A:C	eQTLcatalogue	TwinsUK_ge_fat	ENSG00000225138	A	1.2239e-12	-0.363914	6.1195e-09	C	+	5	421426	CTD-2228K2.7	1
5:421455:G:T	eQTLcatalogue	TwinsUK_ge_fat	ENSG00000180104	G	3.35593e-20	-0.0932034	1.67796e-16	T	+	5	421455	EXOC3	1
5:421455:G:T	eQTLcatalogue	TwinsUK_ge_fat	ENSG00000221990	G	1.25027e-12	0.172872	6.25135e-09	T	-	5	421455	C5orf55	1
5:421455:G:T	eQTLcatalogue	TwinsUK_ge_fat	ENSG00000225138	G	5.64918e-11	0.249376	2.82459e-07	T	-	5	421455	CTD-2228K2.7	1
5:422178:A:G	eQTLcatalogue	TwinsUK_ge_fat	ENSG00000180104	G	1.64813e-34	-0.112122	8.24065e-31	A	+	5	422178	EXOC3	1
5:422178:A:G	eQTLcatalogue	TwinsUK_ge_fat	ENSG00000221990	G	4.95477e-16	0.184202	2.47738e-12	A	-	5	422178	C5orf55	1
5:423169:C:T	eQTLcatalogue	TwinsUK_ge_fat	ENSG00000180104	C	1.64813e-34	-0.112122	8.24065e-31	T	+	5	423169	EXOC3	1
5:423169:C:T	eQTLcatalogue	TwinsUK_ge_fat	ENSG00000221990	C	4.95477e-16	0.184202	2.47738e-12	T	-	5	423169	C5orf55	1
5:423595:C:T	eQTLcatalogue	TwinsUK_ge_fat	ENSG00000180104	C	1.64813e-34	-0.112122	8.24065e-31	T	+	5	423595	EXOC3	1
5:423595:C:T	eQTLcatalogue	TwinsUK_ge_fat	ENSG00000221990	C	4.95477e-16	0.184202	2.47738e-12	T	-	5	423595	C5orf55	1
5:423671:C:T	eQTLcatalogue	TwinsUK_ge_fat	ENSG00000180104	C	1.64813e-34	-0.112122	8.24065e-31	T	+	5	423671	EXOC3	1
5:423671:C:T	eQTLcatalogue	TwinsUK_ge_fat	ENSG00000221990	C	4.95477e-16	0.184202	2.47738e-12	T	-	5	423671	C5orf55	1
5:423906:A:G	eQTLcatalogue	TwinsUK_ge_fat	ENSG00000180104	G	1.64813e-34	-0.112122	8.24065e-31	A	+	5	423906	EXOC3	1
5:423906:A:G	eQTLcatalogue	TwinsUK_ge_fat	ENSG00000221990	G	4.95477e-16	0.184202	2.47738e-12	A	-	5	423906	C5orf55	1
5:428236:A:C	eQTLcatalogue	TwinsUK_ge_fat	ENSG00000180104	C	1.60833e-34	-0.111977	8.04165e-31	A	+	5	428236	EXOC3	1
5:428236:A:C	eQTLcatalogue	TwinsUK_ge_fat	ENSG00000221990	C	1.26927e-15	0.181547	6.34635e-12	A	-	5	428236	C5orf55	1
5:429124:C:G	eQTLcatalogue	TwinsUK_ge_fat	ENSG00000180104	C	1.64813e-34	-0.112122	8.24065e-31	G	+	5	429124	EXOC3	1
5:429124:C:G	eQTLcatalogue	TwinsUK_ge_fat	ENSG00000221990	C	4.95477e-16	0.184202	2.47738e-12	G	-	5	429124	C5orf55	1
5:429818:C:G	eQTLcatalogue	TwinsUK_ge_fat	ENSG00000180104	C	1.64813e-34	-0.112122	8.24065e-31	G	+	5	429818	EXOC3	1
5:429818:C:G	eQTLcatalogue	TwinsUK_ge_fat	ENSG00000221990	C	4.95477e-16	0.184202	2.47738e-12	G	-	5	429818	C5orf55	1
5:430059:A:G	eQTLcatalogue	TwinsUK_ge_fat	ENSG00000180104	G	1.64813e-34	-0.112122	8.24065e-31	A	+	5	430059	EXOC3	1
5:430059:A:G	eQTLcatalogue	TwinsUK_ge_fat	ENSG00000221990	G	4.95477e-16	0.184202	2.47738e-12	A	-	5	430059	C5orf55	1
5:430217:C:T	eQTLcatalogue	TwinsUK_ge_fat	ENSG00000180104	C	2.49337e-34	-0.106691	1.24668e-30	T	+	5	430217	EXOC3	1
5:430217:C:T	eQTLcatalogue	TwinsUK_ge_fat	ENSG00000225138	C	2.57836e-06	0.162915	0.0128918	T	-	5	430217	CTD-2228K2.7	1
5:434722:C:G	eQTLcatalogue	TwinsUK_ge_fat	ENSG00000180104	G	8.83881e-35	-0.11356	4.4194e-31	C	+	5	434722	EXOC3	1
5:434722:C:G	eQTLcatalogue	TwinsUK_ge_fat	ENSG00000221990	G	5.45747e-15	0.179686	2.72873e-11	C	-	5	434722	C5orf55	1
5:436981:A:G	eQTLcatalogue	TwinsUK_ge_fat	ENSG00000180104	A	5.70159e-31	-0.106296	2.85079e-27	G	+	5	436981	EXOC3	1
5:436981:A:G	eQTLcatalogue	TwinsUK_ge_fat	ENSG00000221990	A	2.4006e-12	0.159848	1.2003e-08	G	-	5	436981	C5orf55	1
5:437542:C:T	eQTLcatalogue	TwinsUK_ge_fat	ENSG00000180104	T	8.83881e-35	-0.11356	4.4194e-31	C	+	5	437542	EXOC3	1
5:437542:C:T	eQTLcatalogue	TwinsUK_ge_fat	ENSG00000221990	T	5.45747e-15	0.179686	2.72873e-11	C	-	5	437542	C5orf55	1
5:437586:A:G	eQTLcatalogue	TwinsUK_ge_fat	ENSG00000180104	G	8.83881e-35	-0.11356	4.4194e-31	A	+	5	437586	EXOC3	1
5:437586:A:G	eQTLcatalogue	TwinsUK_ge_fat	ENSG00000221990	G	5.45747e-15	0.179686	2.72873e-11	A	-	5	437586	C5orf55	1
5:437667:A:G	eQTLcatalogue	TwinsUK_ge_fat	ENSG00000180104	G	8.83881e-35	-0.11356	4.4194e-31	A	+	5	437667	EXOC3	1
5:437667:A:G	eQTLcatalogue	TwinsUK_ge_fat	ENSG00000221990	G	5.45747e-15	0.179686	2.72873e-11	A	-	5	437667	C5orf55	1
5:437862:C:G	eQTLcatalogue	TwinsUK_ge_fat	ENSG00000180104	G	8.83881e-35	-0.11356	4.4194e-31	C	+	5	437862	EXOC3	1
5:437862:C:G	eQTLcatalogue	TwinsUK_ge_fat	ENSG00000221990	G	5.45747e-15	0.179686	2.72873e-11	C	-	5	437862	C5orf55	1
5:416118:A:G	eQTLcatalogue	TwinsUK_ge_LCL	ENSG00000066230	G	1.90936e-15	0.164724	9.5468e-12	A	-	5	416118	SLC9A3	1
5:416118:A:G	eQTLcatalogue	TwinsUK_ge_LCL	ENSG00000180104	G	1.92165e-09	-0.0574113	9.60825e-06	A	+	5	416118	EXOC3	1
5:416118:A:G	eQTLcatalogue	TwinsUK_ge_LCL	ENSG00000225138	G	3.59811e-22	0.420537	1.79905e-18	A	-	5	416118	CTD-2228K2.7	1
5:416672:A:G	eQTLcatalogue	TwinsUK_ge_LCL	ENSG00000066230	G	1.87203e-15	0.164902	9.36015e-12	A	-	5	416672	SLC9A3	1
5:416672:A:G	eQTLcatalogue	TwinsUK_ge_LCL	ENSG00000180104	G	4.82506e-09	-0.0560697	2.41253e-05	A	+	5	416672	EXOC3	1
5:416672:A:G	eQTLcatalogue	TwinsUK_ge_LCL	ENSG00000225138	G	9.48024e-23	0.426106	4.74012e-19	A	-	5	416672	CTD-2228K2.7	1
5:418494:A:G	eQTLcatalogue	TwinsUK_ge_LCL	ENSG00000066230	A	5.61921e-16	0.168294	2.80961e-12	G	-	5	418494	SLC9A3	1
5:418494:A:G	eQTLcatalogue	TwinsUK_ge_LCL	ENSG00000180104	A	2.24408e-09	-0.0574169	1.12204e-05	G	+	5	418494	EXOC3	1
5:418494:A:G	eQTLcatalogue	TwinsUK_ge_LCL	ENSG00000225138	A	2.23761e-23	0.433106	1.11881e-19	G	-	5	418494	CTD-2228K2.7	1
5:421193:C:G	eQTLcatalogue	TwinsUK_ge_LCL	ENSG00000066230	G	2.11465e-16	0.166603	1.05733e-12	C	-	5	421193	SLC9A3	1
5:421193:C:G	eQTLcatalogue	TwinsUK_ge_LCL	ENSG00000180104	G	7.91683e-08	-0.0505712	0.000395842	C	+	5	421193	EXOC3	1
5:421193:C:G	eQTLcatalogue	TwinsUK_ge_LCL	ENSG00000221990	G	6.7163e-06	0.0498144	0.0335815	C	-	5	421193	C5orf55	1
5:421193:C:G	eQTLcatalogue	TwinsUK_ge_LCL	ENSG00000225138	G	3.55493e-20	0.394062	1.77746e-16	C	-	5	421193	CTD-2228K2.7	1
5:421403:A:G	eQTLcatalogue	TwinsUK_ge_LCL	ENSG00000066230	G	8.00833e-16	0.166686	4.00417e-12	A	-	5	421403	SLC9A3	1
5:421403:A:G	eQTLcatalogue	TwinsUK_ge_LCL	ENSG00000180104	G	2.05124e-09	-0.0572841	1.02562e-05	A	+	5	421403	EXOC3	1
5:421403:A:G	eQTLcatalogue	TwinsUK_ge_LCL	ENSG00000225138	G	3.17779e-23	0.429756	1.5889e-19	A	-	5	421403	CTD-2228K2.7	1
5:421455:G:T	eQTLcatalogue	TwinsUK_ge_LCL	ENSG00000066230	G	8.00833e-16	0.166686	4.00417e-12	T	-	5	421455	SLC9A3	1
5:421455:G:T	eQTLcatalogue	TwinsUK_ge_LCL	ENSG00000180104	G	2.05124e-09	-0.0572841	1.02562e-05	T	+	5	421455	EXOC3	1
5:421455:G:T	eQTLcatalogue	TwinsUK_ge_LCL	ENSG00000225138	G	3.17779e-23	0.429756	1.5889e-19	T	-	5	421455	CTD-2228K2.7	1
5:422178:A:G	eQTLcatalogue	TwinsUK_ge_LCL	ENSG00000066230	G	4.31628e-12	0.136979	2.15814e-08	A	-	5	422178	SLC9A3	1
5:422178:A:G	eQTLcatalogue	TwinsUK_ge_LCL	ENSG00000180104	G	4.00204e-15	-0.069955	2.00102e-11	A	+	5	422178	EXOC3	1
5:422178:A:G	eQTLcatalogue	TwinsUK_ge_LCL	ENSG00000221990	G	8.8228e-06	0.0474171	0.044114	A	-	5	422178	C5orf55	1
5:422178:A:G	eQTLcatalogue	TwinsUK_ge_LCL	ENSG00000225138	G	1.44519e-19	0.374231	7.22595e-16	A	-	5	422178	CTD-2228K2.7	1
5:423169:C:T	eQTLcatalogue	TwinsUK_ge_LCL	ENSG00000066230	C	4.31628e-12	0.136979	2.15814e-08	T	-	5	423169	SLC9A3	1
5:423169:C:T	eQTLcatalogue	TwinsUK_ge_LCL	ENSG00000180104	C	4.00204e-15	-0.069955	2.00102e-11	T	+	5	423169	EXOC3	1
5:423169:C:T	eQTLcatalogue	TwinsUK_ge_LCL	ENSG00000221990	C	8.8228e-06	0.0474171	0.044114	T	-	5	423169	C5orf55	1
5:423169:C:T	eQTLcatalogue	TwinsUK_ge_LCL	ENSG00000225138	C	1.44519e-19	0.374231	7.22595e-16	T	-	5	423169	CTD-2228K2.7	1
5:423595:C:T	eQTLcatalogue	TwinsUK_ge_LCL	ENSG00000066230	C	4.31628e-12	0.136979	2.15814e-08	T	-	5	423595	SLC9A3	1
5:423595:C:T	eQTLcatalogue	TwinsUK_ge_LCL	ENSG00000180104	C	4.00204e-15	-0.069955	2.00102e-11	T	+	5	423595	EXOC3	1
5:423595:C:T	eQTLcatalogue	TwinsUK_ge_LCL	ENSG00000221990	C	8.8228e-06	0.0474171	0.044114	T	-	5	423595	C5orf55	1
5:423595:C:T	eQTLcatalogue	TwinsUK_ge_LCL	ENSG00000225138	C	1.44519e-19	0.374231	7.22595e-16	T	-	5	423595	CTD-2228K2.7	1
5:423671:C:T	eQTLcatalogue	TwinsUK_ge_LCL	ENSG00000066230	C	4.31628e-12	0.136979	2.15814e-08	T	-	5	423671	SLC9A3	1
5:423671:C:T	eQTLcatalogue	TwinsUK_ge_LCL	ENSG00000180104	C	4.00204e-15	-0.069955	2.00102e-11	T	+	5	423671	EXOC3	1
5:423671:C:T	eQTLcatalogue	TwinsUK_ge_LCL	ENSG00000221990	C	8.8228e-06	0.0474171	0.044114	T	-	5	423671	C5orf55	1
5:423671:C:T	eQTLcatalogue	TwinsUK_ge_LCL	ENSG00000225138	C	1.44519e-19	0.374231	7.22595e-16	T	-	5	423671	CTD-2228K2.7	1
5:423906:A:G	eQTLcatalogue	TwinsUK_ge_LCL	ENSG00000066230	G	4.31628e-12	0.136979	2.15814e-08	A	-	5	423906	SLC9A3	1
5:423906:A:G	eQTLcatalogue	TwinsUK_ge_LCL	ENSG00000180104	G	4.00204e-15	-0.069955	2.00102e-11	A	+	5	423906	EXOC3	1
5:423906:A:G	eQTLcatalogue	TwinsUK_ge_LCL	ENSG00000221990	G	8.8228e-06	0.0474171	0.044114	A	-	5	423906	C5orf55	1
5:423906:A:G	eQTLcatalogue	TwinsUK_ge_LCL	ENSG00000225138	G	1.44519e-19	0.374231	7.22595e-16	A	-	5	423906	CTD-2228K2.7	1
5:428236:A:C	eQTLcatalogue	TwinsUK_ge_LCL	ENSG00000066230	C	7.0782e-12	0.135484	3.5391e-08	A	-	5	428236	SLC9A3	1
5:428236:A:C	eQTLcatalogue	TwinsUK_ge_LCL	ENSG00000180104	C	1.27742e-15	-0.07103	6.3871e-12	A	+	5	428236	EXOC3	1
5:428236:A:C	eQTLcatalogue	TwinsUK_ge_LCL	ENSG00000225138	C	3.58094e-19	0.370004	1.79047e-15	A	-	5	428236	CTD-2228K2.7	1
5:429124:C:G	eQTLcatalogue	TwinsUK_ge_LCL	ENSG00000066230	C	4.31628e-12	0.136979	2.15814e-08	G	-	5	429124	SLC9A3	1
5:429124:C:G	eQTLcatalogue	TwinsUK_ge_LCL	ENSG00000180104	C	4.00204e-15	-0.069955	2.00102e-11	G	+	5	429124	EXOC3	1
5:429124:C:G	eQTLcatalogue	TwinsUK_ge_LCL	ENSG00000221990	C	8.8228e-06	0.0474171	0.044114	G	-	5	429124	C5orf55	1
5:429124:C:G	eQTLcatalogue	TwinsUK_ge_LCL	ENSG00000225138	C	1.44519e-19	0.374231	7.22595e-16	G	-	5	429124	CTD-2228K2.7	1
5:429818:C:G	eQTLcatalogue	TwinsUK_ge_LCL	ENSG00000066230	C	4.31628e-12	0.136979	2.15814e-08	G	-	5	429818	SLC9A3	1
5:429818:C:G	eQTLcatalogue	TwinsUK_ge_LCL	ENSG00000180104	C	4.00204e-15	-0.069955	2.00102e-11	G	+	5	429818	EXOC3	1
5:429818:C:G	eQTLcatalogue	TwinsUK_ge_LCL	ENSG00000221990	C	8.8228e-06	0.0474171	0.044114	G	-	5	429818	C5orf55	1
5:429818:C:G	eQTLcatalogue	TwinsUK_ge_LCL	ENSG00000225138	C	1.44519e-19	0.374231	7.22595e-16	G	-	5	429818	CTD-2228K2.7	1
5:430059:A:G	eQTLcatalogue	TwinsUK_ge_LCL	ENSG00000066230	G	4.31628e-12	0.136979	2.15814e-08	A	-	5	430059	SLC9A3	1
5:430059:A:G	eQTLcatalogue	TwinsUK_ge_LCL	ENSG00000180104	G	4.00204e-15	-0.069955	2.00102e-11	A	+	5	430059	EXOC3	1
5:430059:A:G	eQTLcatalogue	TwinsUK_ge_LCL	ENSG00000221990	G	8.8228e-06	0.0474171	0.044114	A	-	5	430059	C5orf55	1
5:430059:A:G	eQTLcatalogue	TwinsUK_ge_LCL	ENSG00000225138	G	1.44519e-19	0.374231	7.22595e-16	A	-	5	430059	CTD-2228K2.7	1
5:430217:C:T	eQTLcatalogue	TwinsUK_ge_LCL	ENSG00000063438	C	5.41418e-06	0.0616157	0.0270709	T	-	5	430217	AHRR	1
5:430217:C:T	eQTLcatalogue	TwinsUK_ge_LCL	ENSG00000066230	C	3.66695e-24	0.184645	1.83348e-20	T	-	5	430217	SLC9A3	1
5:430217:C:T	eQTLcatalogue	TwinsUK_ge_LCL	ENSG00000180104	C	1.56149e-14	-0.0651496	7.80745e-11	T	+	5	430217	EXOC3	1
5:430217:C:T	eQTLcatalogue	TwinsUK_ge_LCL	ENSG00000225138	C	6.39023e-42	0.503234	3.19511e-38	T	-	5	430217	CTD-2228K2.7	1
5:434722:C:G	eQTLcatalogue	TwinsUK_ge_LCL	ENSG00000066230	G	6.51528e-12	0.137056	3.25764e-08	C	-	5	434722	SLC9A3	1
5:434722:C:G	eQTLcatalogue	TwinsUK_ge_LCL	ENSG00000180104	G	3.81789e-15	-0.0706063	1.90895e-11	C	+	5	434722	EXOC3	1
5:434722:C:G	eQTLcatalogue	TwinsUK_ge_LCL	ENSG00000225138	G	9.27276e-20	0.379275	4.63638e-16	C	-	5	434722	CTD-2228K2.7	1
5:436981:A:G	eQTLcatalogue	TwinsUK_ge_LCL	ENSG00000066230	A	3.46342e-11	0.130851	1.73171e-07	G	-	5	436981	SLC9A3	1
5:436981:A:G	eQTLcatalogue	TwinsUK_ge_LCL	ENSG00000180104	A	1.53931e-14	-0.0682857	7.69655e-11	G	+	5	436981	EXOC3	1
5:436981:A:G	eQTLcatalogue	TwinsUK_ge_LCL	ENSG00000221990	A	9.17894e-07	0.0520402	0.00458947	G	-	5	436981	C5orf55	1
5:436981:A:G	eQTLcatalogue	TwinsUK_ge_LCL	ENSG00000225138	A	3.55701e-16	0.33895	1.77851e-12	G	-	5	436981	CTD-2228K2.7	1
5:437542:C:T	eQTLcatalogue	TwinsUK_ge_LCL	ENSG00000066230	T	6.51528e-12	0.137056	3.25764e-08	C	-	5	437542	SLC9A3	1
5:437542:C:T	eQTLcatalogue	TwinsUK_ge_LCL	ENSG00000180104	T	3.81789e-15	-0.0706063	1.90895e-11	C	+	5	437542	EXOC3	1
5:437542:C:T	eQTLcatalogue	TwinsUK_ge_LCL	ENSG00000225138	T	9.27276e-20	0.379275	4.63638e-16	C	-	5	437542	CTD-2228K2.7	1
5:437586:A:G	eQTLcatalogue	TwinsUK_ge_LCL	ENSG00000066230	G	6.51528e-12	0.137056	3.25764e-08	A	-	5	437586	SLC9A3	1
5:437586:A:G	eQTLcatalogue	TwinsUK_ge_LCL	ENSG00000180104	G	3.81789e-15	-0.0706063	1.90895e-11	A	+	5	437586	EXOC3	1
5:437586:A:G	eQTLcatalogue	TwinsUK_ge_LCL	ENSG00000225138	G	9.27276e-20	0.379275	4.63638e-16	A	-	5	437586	CTD-2228K2.7	1
5:437667:A:G	eQTLcatalogue	TwinsUK_ge_LCL	ENSG00000066230	G	6.51528e-12	0.137056	3.25764e-08	A	-	5	437667	SLC9A3	1
5:437667:A:G	eQTLcatalogue	TwinsUK_ge_LCL	ENSG00000180104	G	3.81789e-15	-0.0706063	1.90895e-11	A	+	5	437667	EXOC3	1
5:437667:A:G	eQTLcatalogue	TwinsUK_ge_LCL	ENSG00000225138	G	9.27276e-20	0.379275	4.63638e-16	A	-	5	437667	CTD-2228K2.7	1
5:437862:C:G	eQTLcatalogue	TwinsUK_ge_LCL	ENSG00000066230	G	6.51528e-12	0.137056	3.25764e-08	C	-	5	437862	SLC9A3	1
5:437862:C:G	eQTLcatalogue	TwinsUK_ge_LCL	ENSG00000180104	G	3.81789e-15	-0.0706063	1.90895e-11	C	+	5	437862	EXOC3	1
5:437862:C:G	eQTLcatalogue	TwinsUK_ge_LCL	ENSG00000225138	G	9.27276e-20	0.379275	4.63638e-16	C	-	5	437862	CTD-2228K2.7	1
2:68385097:A:G	eQTLcatalogue	TwinsUK_ge_skin	ENSG00000243667	A	4.97146e-13	-0.197751	2.48573e-09	G	+	2	68385097	WDR92	1
2:68393144:A:T	eQTLcatalogue	TwinsUK_ge_skin	ENSG00000243667	T	3.30717e-12	-0.191231	1.65358e-08	A	+	2	68393144	WDR92	1
2:68394184:C:T	eQTLcatalogue	TwinsUK_ge_skin	ENSG00000243667	C	3.30717e-12	-0.191231	1.65358e-08	T	+	2	68394184	WDR92	1
2:68395631:A:G	eQTLcatalogue	TwinsUK_ge_skin	ENSG00000243667	G	5.75734e-12	-0.189012	2.87867e-08	A	+	2	68395631	WDR92	1
2:68398919:C:G	eQTLcatalogue	TwinsUK_ge_skin	ENSG00000243667	G	5.75734e-12	-0.189012	2.87867e-08	C	+	2	68398919	WDR92	1
2:68399190:C:T	eQTLcatalogue	TwinsUK_ge_skin	ENSG00000243667	C	5.75734e-12	-0.189012	2.87867e-08	T	+	2	68399190	WDR92	1
2:68402012:G:T	eQTLcatalogue	TwinsUK_ge_skin	ENSG00000243667	G	5.75734e-12	-0.189012	2.87867e-08	T	+	2	68402012	WDR92	1
2:68402830:C:G	eQTLcatalogue	TwinsUK_ge_skin	ENSG00000243667	G	8.47435e-07	-0.118772	0.00423717	C	+	2	68402830	WDR92	1
2:68410372:A:C	eQTLcatalogue	TwinsUK_ge_skin	ENSG00000243667	C	5.14935e-12	-0.188528	2.57468e-08	A	+	2	68410372	WDR92	1
2:68410660:G:T	eQTLcatalogue	TwinsUK_ge_skin	ENSG00000243667	T	5.14935e-12	-0.188528	2.57468e-08	G	+	2	68410660	WDR92	1
2:68411414:A:G	eQTLcatalogue	TwinsUK_ge_skin	ENSG00000243667	G	5.14935e-12	-0.188528	2.57468e-08	A	+	2	68411414	WDR92	1
2:68418868:A:T	eQTLcatalogue	TwinsUK_ge_skin	ENSG00000243667	A	5.14935e-12	-0.188528	2.57468e-08	T	+	2	68418868	WDR92	1
2:68419487:A:G	eQTLcatalogue	TwinsUK_ge_skin	ENSG00000243667	G	5.14935e-12	-0.188528	2.57468e-08	A	+	2	68419487	WDR92	1
2:68420070:G:T	eQTLcatalogue	TwinsUK_ge_skin	ENSG00000243667	G	5.14935e-12	-0.188528	2.57468e-08	T	+	2	68420070	WDR92	1
2:68421049:A:G	eQTLcatalogue	TwinsUK_ge_skin	ENSG00000243667	G	5.14935e-12	-0.188528	2.57468e-08	A	+	2	68421049	WDR92	1
2:68422771:A:G	eQTLcatalogue	TwinsUK_ge_skin	ENSG00000243667	G	6.93028e-12	-0.187249	3.46514e-08	A	+	2	68422771	WDR92	1
2:68423530:A:G	eQTLcatalogue	TwinsUK_ge_skin	ENSG00000243667	G	6.93028e-12	-0.187249	3.46514e-08	A	+	2	68423530	WDR92	1
2:68430925:C:T	eQTLcatalogue	TwinsUK_ge_skin	ENSG00000243667	C	7.7481e-12	-0.187726	3.87405e-08	T	+	2	68430925	WDR92	1
2:68431259:A:G	eQTLcatalogue	TwinsUK_ge_skin	ENSG00000243667	G	7.7481e-12	-0.187726	3.87405e-08	A	+	2	68431259	WDR92	1
2:68433831:A:G	eQTLcatalogue	TwinsUK_ge_skin	ENSG00000243667	G	7.7481e-12	-0.187726	3.87405e-08	A	+	2	68433831	WDR92	1
2:68435431:C:G	eQTLcatalogue	TwinsUK_ge_skin	ENSG00000243667	C	7.7481e-12	-0.187726	3.87405e-08	G	+	2	68435431	WDR92	1
2:68438614:C:T	eQTLcatalogue	TwinsUK_ge_skin	ENSG00000243667	C	7.7481e-12	-0.187726	3.87405e-08	T	+	2	68438614	WDR92	1
2:68439960:C:T	eQTLcatalogue	TwinsUK_ge_skin	ENSG00000243667	C	7.7481e-12	-0.187726	3.87405e-08	T	+	2	68439960	WDR92	1
2:68443651:A:G	eQTLcatalogue	TwinsUK_ge_skin	ENSG00000243667	A	7.7481e-12	-0.187726	3.87405e-08	G	+	2	68443651	WDR92	1
2:68443835:A:T	eQTLcatalogue	TwinsUK_ge_skin	ENSG00000243667	A	7.7481e-12	-0.187726	3.87405e-08	T	+	2	68443835	WDR92	1
2:68446936:C:T	eQTLcatalogue	TwinsUK_ge_skin	ENSG00000243667	C	7.7481e-12	-0.187726	3.87405e-08	T	+	2	68446936	WDR92	1
2:68457573:C:T	eQTLcatalogue	TwinsUK_ge_skin	ENSG00000243667	C	1.11072e-11	-0.186588	5.5536e-08	T	+	2	68457573	WDR92	1
2:68457854:A:G	eQTLcatalogue	TwinsUK_ge_skin	ENSG00000243667	A	1.11072e-11	-0.186588	5.5536e-08	G	+	2	68457854	WDR92	1
2:68463612:A:G	eQTLcatalogue	TwinsUK_ge_skin	ENSG00000243667	G	1.11072e-11	-0.186588	5.5536e-08	A	+	2	68463612	WDR92	1
2:68467910:A:C	eQTLcatalogue	TwinsUK_ge_skin	ENSG00000243667	A	1.11072e-11	-0.186588	5.5536e-08	C	+	2	68467910	WDR92	1
2:68475595:A:C	eQTLcatalogue	TwinsUK_ge_skin	ENSG00000243667	C	1.11072e-11	-0.186588	5.5536e-08	A	+	2	68475595	WDR92	1
2:68477248:C:T	eQTLcatalogue	TwinsUK_ge_skin	ENSG00000243667	T	1.11072e-11	-0.186588	5.5536e-08	C	+	2	68477248	WDR92	1
2:68478919:A:G	eQTLcatalogue	TwinsUK_ge_skin	ENSG00000243667	A	1.11072e-11	-0.186588	5.5536e-08	G	+	2	68478919	WDR92	1
2:179603225:A:G	eQTLcatalogue	TwinsUK_ge_skin	ENSG00000223960	G	2.46453e-07	0.282009	0.00123226	A	-	2	179603225	AC009948.5	1
2:179604160:G:T	eQTLcatalogue	TwinsUK_ge_skin	ENSG00000223960	T	2.46453e-07	0.282009	0.00123226	G	-	2	179604160	AC009948.5	1
2:179604366:G:T	eQTLcatalogue	TwinsUK_ge_skin	ENSG00000223960	T	8.45094e-07	0.266179	0.00422547	G	-	2	179604366	AC009948.5	1
2:179604742:A:G	eQTLcatalogue	TwinsUK_ge_skin	ENSG00000223960	G	2.46453e-07	0.282009	0.00123226	A	-	2	179604742	AC009948.5	1
2:179605705:A:G	eQTLcatalogue	TwinsUK_ge_skin	ENSG00000223960	A	2.46453e-07	0.282009	0.00123226	G	-	2	179605705	AC009948.5	1
2:179607487:C:T	eQTLcatalogue	TwinsUK_ge_skin	ENSG00000223960	T	2.46453e-07	0.282009	0.00123226	C	-	2	179607487	AC009948.5	1
2:179609005:A:G	eQTLcatalogue	TwinsUK_ge_skin	ENSG00000223960	G	2.46453e-07	0.282009	0.00123226	A	-	2	179609005	AC009948.5	1
2:179609978:A:C	eQTLcatalogue	TwinsUK_ge_skin	ENSG00000223960	A	3.75297e-08	0.303881	0.000187648	C	-	2	179609978	AC009948.5	1
2:179610009:G:T	eQTLcatalogue	TwinsUK_ge_skin	ENSG00000223960	T	3.75297e-08	0.303881	0.000187648	G	-	2	179610009	AC009948.5	1
2:179617370:C:T	eQTLcatalogue	TwinsUK_ge_skin	ENSG00000223960	T	3.75297e-08	0.303881	0.000187648	C	-	2	179617370	AC009948.5	1
2:179622805:A:G	eQTLcatalogue	TwinsUK_ge_skin	ENSG00000223960	A	3.75297e-08	0.303881	0.000187648	G	-	2	179622805	AC009948.5	1
2:179631851:A:C	eQTLcatalogue	TwinsUK_ge_skin	ENSG00000223960	C	3.75297e-08	0.303881	0.000187648	A	-	2	179631851	AC009948.5	1
2:179634936:C:T	eQTLcatalogue	TwinsUK_ge_skin	ENSG00000223960	C	3.75297e-08	0.303881	0.000187648	T	-	2	179634936	AC009948.5	1
2:179635850:C:T	eQTLcatalogue	TwinsUK_ge_skin	ENSG00000223960	T	3.75297e-08	0.303881	0.000187648	C	-	2	179635850	AC009948.5	1
2:179636257:A:T	eQTLcatalogue	TwinsUK_ge_skin	ENSG00000223960	T	3.75297e-08	0.303881	0.000187648	A	-	2	179636257	AC009948.5	1
2:179636668:C:T	eQTLcatalogue	TwinsUK_ge_skin	ENSG00000223960	T	3.75297e-08	0.303881	0.000187648	C	-	2	179636668	AC009948.5	1
2:179637861:C:G	eQTLcatalogue	TwinsUK_ge_skin	ENSG00000223960	C	3.75297e-08	0.303881	0.000187648	G	-	2	179637861	AC009948.5	1
2:179641975:C:T	eQTLcatalogue	TwinsUK_ge_skin	ENSG00000223960	C	3.75297e-08	0.303881	0.000187648	T	-	2	179641975	AC009948.5	1
2:179644160:C:T	eQTLcatalogue	TwinsUK_ge_skin	ENSG00000223960	T	7.30222e-08	0.293741	0.000365111	C	-	2	179644160	AC009948.5	1
2:179645285:C:G	eQTLcatalogue	TwinsUK_ge_skin	ENSG00000223960	C	7.30222e-08	0.293741	0.000365111	G	-	2	179645285	AC009948.5	1
2:179645731:A:C	eQTLcatalogue	TwinsUK_ge_skin	ENSG00000223960	C	7.30222e-08	0.293741	0.000365111	A	-	2	179645731	AC009948.5	1
2:179647546:A:G	eQTLcatalogue	TwinsUK_ge_skin	ENSG00000223960	A	3.34865e-06	0.242888	0.0167433	G	-	2	179647546	AC009948.5	1
2:179660954:A:T	eQTLcatalogue	TwinsUK_ge_skin	ENSG00000223960	A	7.30222e-08	0.293741	0.000365111	T	-	2	179660954	AC009948.5	1
2:179666246:A:T	eQTLcatalogue	TwinsUK_ge_skin	ENSG00000223960	T	7.30222e-08	0.293741	0.000365111	A	-	2	179666246	AC009948.5	1
2:179666425:A:G	eQTLcatalogue	TwinsUK_ge_skin	ENSG00000223960	G	7.30222e-08	0.293741	0.000365111	A	-	2	179666425	AC009948.5	1
2:179672462:A:G	eQTLcatalogue	TwinsUK_ge_skin	ENSG00000223960	A	7.30222e-08	0.293741	0.000365111	G	-	2	179672462	AC009948.5	1
2:179674471:G:T	eQTLcatalogue	TwinsUK_ge_skin	ENSG00000223960	T	7.30222e-08	0.293741	0.000365111	G	-	2	179674471	AC009948.5	1
2:179676118:G:T	eQTLcatalogue	TwinsUK_ge_skin	ENSG00000223960	G	7.30222e-08	0.293741	0.000365111	T	-	2	179676118	AC009948.5	1
2:179678889:A:G	eQTLcatalogue	TwinsUK_ge_skin	ENSG00000223960	A	7.30222e-08	0.293741	0.000365111	G	-	2	179678889	AC009948.5	1
2:179679810:C:T	eQTLcatalogue	TwinsUK_ge_skin	ENSG00000223960	C	7.30222e-08	0.293741	0.000365111	T	-	2	179679810	AC009948.5	1
2:179684957:A:G	eQTLcatalogue	TwinsUK_ge_skin	ENSG00000223960	G	7.30222e-08	0.293741	0.000365111	A	-	2	179684957	AC009948.5	1
2:179687500:C:T	eQTLcatalogue	TwinsUK_ge_skin	ENSG00000223960	C	7.30222e-08	0.293741	0.000365111	T	-	2	179687500	AC009948.5	1
2:179688530:G:T	eQTLcatalogue	TwinsUK_ge_skin	ENSG00000223960	G	7.30222e-08	0.293741	0.000365111	T	-	2	179688530	AC009948.5	1
5:416118:A:G	eQTLcatalogue	TwinsUK_ge_skin	ENSG00000225138	G	8.84982e-07	0.218316	0.00442491	A	-	5	416118	CTD-2228K2.7	1
5:416672:A:G	eQTLcatalogue	TwinsUK_ge_skin	ENSG00000225138	G	6.95619e-07	0.220333	0.00347809	A	-	5	416672	CTD-2228K2.7	1
5:418093:A:G	eQTLcatalogue	TwinsUK_ge_skin	ENSG00000066230	A	1.56683e-11	-0.523018	7.83415e-08	G	+	5	418093	SLC9A3	1
5:418093:A:G	eQTLcatalogue	TwinsUK_ge_skin	ENSG00000225138	A	3.54592e-11	-0.399696	1.77296e-07	G	+	5	418093	CTD-2228K2.7	1
5:418494:A:G	eQTLcatalogue	TwinsUK_ge_skin	ENSG00000225138	A	1.41725e-07	0.233986	0.000708625	G	-	5	418494	CTD-2228K2.7	1
5:421193:C:G	eQTLcatalogue	TwinsUK_ge_skin	ENSG00000188818	G	2.18458e-06	-0.549498	0.0109229	C	+	5	421193	ZDHHC11	1
5:421193:C:G	eQTLcatalogue	TwinsUK_ge_skin	ENSG00000221990	G	2.89178e-06	0.245822	0.0144589	C	-	5	421193	C5orf55	1
5:421193:C:G	eQTLcatalogue	TwinsUK_ge_skin	ENSG00000225138	G	1.03516e-06	0.210397	0.0051758	C	-	5	421193	CTD-2228K2.7	1
5:421403:A:G	eQTLcatalogue	TwinsUK_ge_skin	ENSG00000225138	G	2.27488e-07	0.229017	0.00113744	A	-	5	421403	CTD-2228K2.7	1
5:421426:A:C	eQTLcatalogue	TwinsUK_ge_skin	ENSG00000066230	A	1.63958e-11	-0.515198	8.1979e-08	C	+	5	421426	SLC9A3	1
5:421426:A:C	eQTLcatalogue	TwinsUK_ge_skin	ENSG00000225138	A	3.94972e-11	-0.393188	1.97486e-07	C	+	5	421426	CTD-2228K2.7	1
5:421455:G:T	eQTLcatalogue	TwinsUK_ge_skin	ENSG00000225138	G	2.27488e-07	0.229017	0.00113744	T	-	5	421455	CTD-2228K2.7	1
5:430217:C:T	eQTLcatalogue	TwinsUK_ge_skin	ENSG00000180104	C	5.07085e-08	-0.054656	0.000253543	T	+	5	430217	EXOC3	1
5:430217:C:T	eQTLcatalogue	TwinsUK_ge_skin	ENSG00000225138	C	4.8099e-08	0.217143	0.000240495	T	-	5	430217	CTD-2228K2.7	1
5:436981:A:G	eQTLcatalogue	TwinsUK_ge_skin	ENSG00000221990	A	1.98597e-06	0.241996	0.00992985	G	-	5	436981	C5orf55	1
2:68393144:A:T	PsychENCODE	PsychENCODE_eQTLs	ENSG00000115946	A	2.79276e-37	-0.248919	3.82775805018407e-34	A	-	2	68393144	PNO1	1
2:68393144:A:T	PsychENCODE	PsychENCODE_eQTLs	ENSG00000119865	A	2.38106e-06	-0.0639459	0.000296798	A	-	2	68393144	CNRIP1	1
2:68393144:A:T	PsychENCODE	PsychENCODE_eQTLs	ENSG00000221823	A	0.000830582	-0.0332653	0.0498688	A	-	2	68393144	PPP3R1	1
2:68394184:C:T	PsychENCODE	PsychENCODE_eQTLs	ENSG00000115946	T	1.82503e-37	-0.249154	2.52211775063467e-34	T	-	2	68394184	PNO1	1
2:68394184:C:T	PsychENCODE	PsychENCODE_eQTLs	ENSG00000119865	T	1.99703e-06	-0.0643289	0.000252674	T	-	2	68394184	CNRIP1	1
2:68394184:C:T	PsychENCODE	PsychENCODE_eQTLs	ENSG00000221823	T	0.000641647	-0.0339178	0.0405054	T	-	2	68394184	PPP3R1	1
2:68395631:A:G	PsychENCODE	PsychENCODE_eQTLs	ENSG00000115946	A	2.46278e-37	-0.249012	3.38323735049899e-34	A	-	2	68395631	PNO1	1
2:68395631:A:G	PsychENCODE	PsychENCODE_eQTLs	ENSG00000119865	A	2.28366e-06	-0.0640377	0.000285684	A	-	2	68395631	CNRIP1	1
2:68395631:A:G	PsychENCODE	PsychENCODE_eQTLs	ENSG00000221823	A	0.000819791	-0.0332896	0.0493494	A	-	2	68395631	PPP3R1	1
2:68399190:C:T	PsychENCODE	PsychENCODE_eQTLs	ENSG00000115946	T	7.44447e-37	-0.247038	1.00166815753429e-33	T	-	2	68399190	PNO1	1
2:68399190:C:T	PsychENCODE	PsychENCODE_eQTLs	ENSG00000119865	T	1.33749e-06	-0.0653807	0.000175113	T	-	2	68399190	CNRIP1	1
2:68399190:C:T	PsychENCODE	PsychENCODE_eQTLs	ENSG00000221823	T	0.000407895	-0.0351059	0.0279382	T	-	2	68399190	PPP3R1	1
2:68418868:A:T	PsychENCODE	PsychENCODE_eQTLs	ENSG00000115946	T	2.6657e-38	-0.251972	3.80838206464067e-35	T	-	2	68418868	PNO1	1
2:68418868:A:T	PsychENCODE	PsychENCODE_eQTLs	ENSG00000119865	T	2.00786e-06	-0.064338	0.000253925	T	-	2	68418868	CNRIP1	1
2:68418868:A:T	PsychENCODE	PsychENCODE_eQTLs	ENSG00000221823	T	0.000736959	-0.0335549	0.0452995	T	-	2	68418868	PPP3R1	1
2:68419487:A:G	PsychENCODE	PsychENCODE_eQTLs	ENSG00000115946	A	2.65137e-38	-0.251982	3.78819312323157e-35	A	-	2	68419487	PNO1	1
2:68419487:A:G	PsychENCODE	PsychENCODE_eQTLs	ENSG00000119865	A	2.00474e-06	-0.064343	0.000253562	A	-	2	68419487	CNRIP1	1
2:68419487:A:G	PsychENCODE	PsychENCODE_eQTLs	ENSG00000221823	A	0.000736074	-0.0335586	0.0452556	A	-	2	68419487	PPP3R1	1
2:68420070:G:T	PsychENCODE	PsychENCODE_eQTLs	ENSG00000115946	T	2.64744e-38	-0.251987	3.78286145913859e-35	T	-	2	68420070	PNO1	1
2:68420070:G:T	PsychENCODE	PsychENCODE_eQTLs	ENSG00000119865	T	2.00338e-06	-0.0643457	0.000253406	T	-	2	68420070	CNRIP1	1
2:68420070:G:T	PsychENCODE	PsychENCODE_eQTLs	ENSG00000221823	T	0.000735996	-0.0335593	0.0452516	T	-	2	68420070	PPP3R1	1
2:68421049:A:G	PsychENCODE	PsychENCODE_eQTLs	ENSG00000115946	A	2.63608e-38	-0.251994	3.76698221949742e-35	A	-	2	68421049	PNO1	1
2:68421049:A:G	PsychENCODE	PsychENCODE_eQTLs	ENSG00000119865	A	2.00083e-06	-0.0643493	0.000253112	A	-	2	68421049	CNRIP1	1
2:68421049:A:G	PsychENCODE	PsychENCODE_eQTLs	ENSG00000221823	A	0.00073532	-0.0335619	0.0452179	A	-	2	68421049	PPP3R1	1
2:68422771:A:G	PsychENCODE	PsychENCODE_eQTLs	ENSG00000115946	A	2.61059e-38	-0.252011	3.73146545134304e-35	A	-	2	68422771	PNO1	1
2:68422771:A:G	PsychENCODE	PsychENCODE_eQTLs	ENSG00000119865	A	1.99559e-06	-0.0643573	0.000252509	A	-	2	68422771	CNRIP1	1
2:68422771:A:G	PsychENCODE	PsychENCODE_eQTLs	ENSG00000221823	A	0.000733734	-0.0335682	0.0451389	A	-	2	68422771	PPP3R1	1
2:68423530:A:G	PsychENCODE	PsychENCODE_eQTLs	ENSG00000115946	A	2.58552e-38	-0.252026	3.69630369472256e-35	A	-	2	68423530	PNO1	1
2:68423530:A:G	PsychENCODE	PsychENCODE_eQTLs	ENSG00000119865	A	1.9934e-06	-0.0643606	0.000252253	A	-	2	68423530	CNRIP1	1
2:68423530:A:G	PsychENCODE	PsychENCODE_eQTLs	ENSG00000221823	A	0.000732846	-0.0335718	0.0450955	A	-	2	68423530	PPP3R1	1
2:68430925:C:T	PsychENCODE	PsychENCODE_eQTLs	ENSG00000115946	T	5.8136e-38	-0.250837	8.19493564938746e-35	T	-	2	68430925	PNO1	1
2:68430925:C:T	PsychENCODE	PsychENCODE_eQTLs	ENSG00000119865	T	1.84259e-06	-0.0645619	0.000234756	T	-	2	68430925	CNRIP1	1
2:68430925:C:T	PsychENCODE	PsychENCODE_eQTLs	ENSG00000221823	T	0.000576625	-0.0342128	0.0371427	T	-	2	68430925	PPP3R1	1
2:68431259:A:G	PsychENCODE	PsychENCODE_eQTLs	ENSG00000115946	A	5.79843e-38	-0.250839	8.17392938591437e-35	A	-	2	68431259	PNO1	1
2:68431259:A:G	PsychENCODE	PsychENCODE_eQTLs	ENSG00000119865	A	1.84359e-06	-0.06456	0.000234873	A	-	2	68431259	CNRIP1	1
2:68431259:A:G	PsychENCODE	PsychENCODE_eQTLs	ENSG00000221823	A	0.000576768	-0.0342119	0.0371501	A	-	2	68431259	PPP3R1	1
2:68435431:C:G	PsychENCODE	PsychENCODE_eQTLs	ENSG00000115946	G	6.42905e-38	-0.250775	9.0445172793233e-35	G	-	2	68435431	PNO1	1
2:68435431:C:G	PsychENCODE	PsychENCODE_eQTLs	ENSG00000119865	G	1.81791e-06	-0.0646191	0.000231876	G	-	2	68435431	CNRIP1	1
2:68435431:C:G	PsychENCODE	PsychENCODE_eQTLs	ENSG00000221823	G	0.000568171	-0.0342633	0.0366969	G	-	2	68435431	PPP3R1	1
2:68439960:C:T	PsychENCODE	PsychENCODE_eQTLs	ENSG00000115946	T	9.07571e-38	-0.250598	1.26861274976362e-34	T	-	2	68439960	PNO1	1
2:68439960:C:T	PsychENCODE	PsychENCODE_eQTLs	ENSG00000119865	T	1.77491e-06	-0.0647643	0.000226864	T	-	2	68439960	CNRIP1	1
2:68439960:C:T	PsychENCODE	PsychENCODE_eQTLs	ENSG00000221823	T	0.000556159	-0.0343631	0.0360629	T	-	2	68439960	PPP3R1	1
2:68443651:A:G	PsychENCODE	PsychENCODE_eQTLs	ENSG00000115946	G	1.19793e-37	-0.250437	1.66723965930683e-34	G	-	2	68443651	PNO1	1
2:68443651:A:G	PsychENCODE	PsychENCODE_eQTLs	ENSG00000119865	G	1.74229e-06	-0.0648751	0.000223038	G	-	2	68443651	CNRIP1	1
2:68443651:A:G	PsychENCODE	PsychENCODE_eQTLs	ENSG00000221823	G	0.000551485	-0.0344179	0.035814	G	-	2	68443651	PPP3R1	1
2:68443835:A:T	PsychENCODE	PsychENCODE_eQTLs	ENSG00000115946	T	1.19895e-37	-0.250448	1.66864404058808e-34	T	-	2	68443835	PNO1	1
2:68443835:A:T	PsychENCODE	PsychENCODE_eQTLs	ENSG00000119865	T	1.7448e-06	-0.0648745	0.000223334	T	-	2	68443835	CNRIP1	1
2:68443835:A:T	PsychENCODE	PsychENCODE_eQTLs	ENSG00000221823	T	0.000550272	-0.0344255	0.035749	T	-	2	68443835	PPP3R1	1
2:68446936:C:T	PsychENCODE	PsychENCODE_eQTLs	ENSG00000115946	T	7.95779e-37	-0.247967	1.069642153986e-33	T	-	2	68446936	PNO1	1
2:68446936:C:T	PsychENCODE	PsychENCODE_eQTLs	ENSG00000119865	T	1.19601e-06	-0.0659509	0.000158015	T	-	2	68446936	CNRIP1	1
2:68446936:C:T	PsychENCODE	PsychENCODE_eQTLs	ENSG00000221823	T	0.000310676	-0.0359594	0.0222479	T	-	2	68446936	PPP3R1	1
2:68457854:A:G	PsychENCODE	PsychENCODE_eQTLs	ENSG00000115946	G	3.17107e-37	-0.251691	4.33606455193832e-34	G	-	2	68457854	PNO1	1
2:68457854:A:G	PsychENCODE	PsychENCODE_eQTLs	ENSG00000119865	G	2.07404e-06	-0.0650865	0.000261589	G	-	2	68457854	CNRIP1	1
2:68457854:A:G	PsychENCODE	PsychENCODE_eQTLs	ENSG00000221823	G	0.00028607	-0.0365194	0.0207583	G	-	2	68457854	PPP3R1	1
2:68467910:A:C	PsychENCODE	PsychENCODE_eQTLs	ENSG00000115946	C	6.1034e-37	-0.250965	8.24335952458793e-34	C	-	2	68467910	PNO1	1
2:68467910:A:C	PsychENCODE	PsychENCODE_eQTLs	ENSG00000119865	C	1.64539e-06	-0.0657801	0.000211693	C	-	2	68467910	CNRIP1	1
2:68467910:A:C	PsychENCODE	PsychENCODE_eQTLs	ENSG00000221823	C	0.000260599	-0.0367932	0.0191876	C	-	2	68467910	PPP3R1	1
2:68475595:A:C	PsychENCODE	PsychENCODE_eQTLs	ENSG00000115946	A	1.56491e-36	-0.24947	2.07897788655159e-33	A	-	2	68475595	PNO1	1
2:68475595:A:C	PsychENCODE	PsychENCODE_eQTLs	ENSG00000119865	A	1.89612e-06	-0.0653612	0.000240991	A	-	2	68475595	CNRIP1	1
2:68475595:A:C	PsychENCODE	PsychENCODE_eQTLs	ENSG00000221823	A	0.000237393	-0.0370152	0.0177273	A	-	2	68475595	PPP3R1	1
2:68477248:C:T	PsychENCODE	PsychENCODE_eQTLs	ENSG00000115946	C	1.80016e-36	-0.249383	2.38635367321812e-33	C	-	2	68477248	PNO1	1
2:68477248:C:T	PsychENCODE	PsychENCODE_eQTLs	ENSG00000119865	C	1.82621e-06	-0.0654953	0.000232844	C	-	2	68477248	CNRIP1	1
2:68477248:C:T	PsychENCODE	PsychENCODE_eQTLs	ENSG00000221823	C	0.000239125	-0.0370142	0.0178369	C	-	2	68477248	PPP3R1	1
2:68478919:A:G	PsychENCODE	PsychENCODE_eQTLs	ENSG00000115946	G	3.33743e-35	-0.244907	4.18815784916081e-32	G	-	2	68478919	PNO1	1
2:68478919:A:G	PsychENCODE	PsychENCODE_eQTLs	ENSG00000119865	G	1.98901e-06	-0.0652243	0.00025175	G	-	2	68478919	CNRIP1	1
2:68478919:A:G	PsychENCODE	PsychENCODE_eQTLs	ENSG00000221823	G	0.000476354	-0.0351899	0.0317564	G	-	2	68478919	PPP3R1	1
2:179607487:C:T	PsychENCODE	PsychENCODE_eQTLs	ENSG00000267784	C	1.58886e-05	-0.152136	0.00165499	C	-	2	179607487	RP11-171I2.1	1
2:179609005:A:G	PsychENCODE	PsychENCODE_eQTLs	ENSG00000267784	A	1.56812e-05	-0.152241	0.00163563	A	-	2	179609005	RP11-171I2.1	1
2:179609978:A:C	PsychENCODE	PsychENCODE_eQTLs	ENSG00000267784	C	1.58859e-05	-0.152137	0.00165474	C	-	2	179609978	RP11-171I2.1	1
2:179610009:G:T	PsychENCODE	PsychENCODE_eQTLs	ENSG00000267784	G	1.58225e-05	-0.152169	0.00164883	G	-	2	179610009	RP11-171I2.1	1
2:179622805:A:G	PsychENCODE	PsychENCODE_eQTLs	ENSG00000267784	G	1.58416e-05	-0.152159	0.0016506	G	-	2	179622805	RP11-171I2.1	1
2:179631851:A:C	PsychENCODE	PsychENCODE_eQTLs	ENSG00000237298	A	0.00065043	-0.111498	0.0409531	A	-	2	179631851	TTN-AS1	1
2:179631851:A:C	PsychENCODE	PsychENCODE_eQTLs	ENSG00000267784	A	8.63348e-06	-0.155342	0.000955817	A	-	2	179631851	RP11-171I2.1	1
2:179635850:C:T	PsychENCODE	PsychENCODE_eQTLs	ENSG00000237298	C	0.000644438	-0.111599	0.0406478	C	-	2	179635850	TTN-AS1	1
2:179635850:C:T	PsychENCODE	PsychENCODE_eQTLs	ENSG00000267784	C	8.40492e-06	-0.155568	0.000932959	C	-	2	179635850	RP11-171I2.1	1
2:179636257:A:T	PsychENCODE	PsychENCODE_eQTLs	ENSG00000237298	A	0.000643461	-0.111617	0.040598	A	-	2	179636257	TTN-AS1	1
2:179636257:A:T	PsychENCODE	PsychENCODE_eQTLs	ENSG00000267784	A	8.36246e-06	-0.155612	0.00092872	A	-	2	179636257	RP11-171I2.1	1
2:179636668:C:T	PsychENCODE	PsychENCODE_eQTLs	ENSG00000237298	C	0.000642063	-0.11164	0.0405268	C	-	2	179636668	TTN-AS1	1
2:179636668:C:T	PsychENCODE	PsychENCODE_eQTLs	ENSG00000267784	C	8.31916e-06	-0.155656	0.000924387	C	-	2	179636668	RP11-171I2.1	1
2:179645285:C:G	PsychENCODE	PsychENCODE_eQTLs	ENSG00000267784	G	1.24642e-05	-0.154519	0.00133126	G	-	2	179645285	RP11-171I2.1	1
2:179645731:A:C	PsychENCODE	PsychENCODE_eQTLs	ENSG00000267784	A	1.24569e-05	-0.154527	0.00133055	A	-	2	179645731	RP11-171I2.1	1
2:179660954:A:T	PsychENCODE	PsychENCODE_eQTLs	ENSG00000180228	T	0.000548438	0.1274	0.035651	T	+	2	179660954	PRKRA	1
2:179660954:A:T	PsychENCODE	PsychENCODE_eQTLs	ENSG00000237298	T	0.000217986	-0.125598	0.0164862	T	-	2	179660954	TTN-AS1	1
2:179660954:A:T	PsychENCODE	PsychENCODE_eQTLs	ENSG00000267784	T	2.67453e-06	-0.170277	0.000329962	T	-	2	179660954	RP11-171I2.1	1
2:179666246:A:T	PsychENCODE	PsychENCODE_eQTLs	ENSG00000180228	A	0.000539604	0.127543	0.0351788	A	+	2	179666246	PRKRA	1
2:179666246:A:T	PsychENCODE	PsychENCODE_eQTLs	ENSG00000237298	A	0.00021531	-0.125687	0.0163136	A	-	2	179666246	TTN-AS1	1
2:179666246:A:T	PsychENCODE	PsychENCODE_eQTLs	ENSG00000267784	A	2.65793e-06	-0.170299	0.00032811	A	-	2	179666246	RP11-171I2.1	1
2:179666425:A:G	PsychENCODE	PsychENCODE_eQTLs	ENSG00000180228	A	0.000538787	0.127558	0.0351348	A	+	2	179666425	PRKRA	1
2:179666425:A:G	PsychENCODE	PsychENCODE_eQTLs	ENSG00000237298	A	0.000215069	-0.125696	0.0162979	A	-	2	179666425	TTN-AS1	1
2:179666425:A:G	PsychENCODE	PsychENCODE_eQTLs	ENSG00000267784	A	2.65541e-06	-0.170306	0.00032782	A	-	2	179666425	RP11-171I2.1	1
2:179672462:A:G	PsychENCODE	PsychENCODE_eQTLs	ENSG00000237298	G	0.000223283	-0.126967	0.0168278	G	-	2	179672462	TTN-AS1	1
2:179672462:A:G	PsychENCODE	PsychENCODE_eQTLs	ENSG00000267784	G	1.73137e-06	-0.175627	0.000221758	G	-	2	179672462	RP11-171I2.1	1
2:179674471:G:T	PsychENCODE	PsychENCODE_eQTLs	ENSG00000237298	G	0.000322561	-0.122707	0.0229614	G	-	2	179674471	TTN-AS1	1
2:179674471:G:T	PsychENCODE	PsychENCODE_eQTLs	ENSG00000267784	G	2.88346e-06	-0.170438	0.000353401	G	-	2	179674471	RP11-171I2.1	1
2:179676118:G:T	PsychENCODE	PsychENCODE_eQTLs	ENSG00000237298	T	0.000325411	-0.122627	0.0231311	T	-	2	179676118	TTN-AS1	1
2:179676118:G:T	PsychENCODE	PsychENCODE_eQTLs	ENSG00000267784	T	2.93906e-06	-0.170293	0.000359641	T	-	2	179676118	RP11-171I2.1	1
2:179678889:A:G	PsychENCODE	PsychENCODE_eQTLs	ENSG00000237298	G	0.000327218	-0.122577	0.0232382	G	-	2	179678889	TTN-AS1	1
2:179678889:A:G	PsychENCODE	PsychENCODE_eQTLs	ENSG00000267784	G	2.95637e-06	-0.170249	0.000361566	G	-	2	179678889	RP11-171I2.1	1
2:179679810:C:T	PsychENCODE	PsychENCODE_eQTLs	ENSG00000237298	T	0.000328001	-0.122554	0.0232851	T	-	2	179679810	TTN-AS1	1
2:179679810:C:T	PsychENCODE	PsychENCODE_eQTLs	ENSG00000267784	T	2.96226e-06	-0.170231	0.000362224	T	-	2	179679810	RP11-171I2.1	1
2:179684957:A:G	PsychENCODE	PsychENCODE_eQTLs	ENSG00000237298	A	0.000310859	-0.122911	0.0222588	A	-	2	179684957	TTN-AS1	1
2:179684957:A:G	PsychENCODE	PsychENCODE_eQTLs	ENSG00000267784	A	2.93512e-06	-0.170137	0.000359198	A	-	2	179684957	RP11-171I2.1	1
2:179687500:C:T	PsychENCODE	PsychENCODE_eQTLs	ENSG00000267784	T	1.25881e-05	-0.152478	0.00134317	T	-	2	179687500	RP11-171I2.1	1
2:179688530:G:T	PsychENCODE	PsychENCODE_eQTLs	ENSG00000237298	T	0.000305592	-0.122978	0.0219446	T	-	2	179688530	TTN-AS1	1
2:179688530:G:T	PsychENCODE	PsychENCODE_eQTLs	ENSG00000267784	T	2.90576e-06	-0.170096	0.000355905	T	-	2	179688530	RP11-171I2.1	1
2:179703487:A:T	PsychENCODE	PsychENCODE_eQTLs	ENSG00000231541	A	0.000450245	0.223744	0.0303166	T	-	2	179703487	RPS6P2	1
2:179706977:A:G	PsychENCODE	PsychENCODE_eQTLs	ENSG00000231541	G	0.000448618	0.224078	0.030227	A	-	2	179706977	RPS6P2	1
2:179707546:A:G	PsychENCODE	PsychENCODE_eQTLs	ENSG00000231541	A	0.000442855	0.224305	0.0299066	G	-	2	179707546	RPS6P2	1
2:179707917:C:T	PsychENCODE	PsychENCODE_eQTLs	ENSG00000231541	T	0.00043856	0.224472	0.0296678	C	-	2	179707917	RPS6P2	1
2:179708488:C:T	PsychENCODE	PsychENCODE_eQTLs	ENSG00000231541	T	0.000434992	0.224615	0.0294693	C	-	2	179708488	RPS6P2	1
2:179710550:C:G	PsychENCODE	PsychENCODE_eQTLs	ENSG00000231541	G	0.000419511	0.224736	0.0285977	C	-	2	179710550	RPS6P2	1
2:179716710:A:C	PsychENCODE	PsychENCODE_eQTLs	ENSG00000231541	A	0.000173569	0.240285	0.013566	A	+	2	179716710	RPS6P2	1
2:179728006:C:T	PsychENCODE	PsychENCODE_eQTLs	ENSG00000163492	T	0.000786664	0.141502	0.0477443	T	+	2	179728006	CCDC141	1
2:179728006:C:T	PsychENCODE	PsychENCODE_eQTLs	ENSG00000231541	T	0.000267074	0.229337	0.01959	T	+	2	179728006	RPS6P2	1
2:179730852:A:G	PsychENCODE	PsychENCODE_eQTLs	ENSG00000231541	G	0.000161647	0.237886	0.0127624	G	+	2	179730852	RPS6P2	1
2:179733011:A:T	PsychENCODE	PsychENCODE_eQTLs	ENSG00000231541	T	0.00017647	0.237019	0.0137612	T	+	2	179733011	RPS6P2	1
2:179733567:C:T	PsychENCODE	PsychENCODE_eQTLs	ENSG00000231541	C	0.000173832	0.23719	0.0135836	C	+	2	179733567	RPS6P2	1
2:179743525:A:G	PsychENCODE	PsychENCODE_eQTLs	ENSG00000231541	G	0.00018378	0.240363	0.0142471	G	+	2	179743525	RPS6P2	1
2:179743944:C:T	PsychENCODE	PsychENCODE_eQTLs	ENSG00000231541	C	0.000146389	0.241331	0.0117198	C	+	2	179743944	RPS6P2	1
2:179745126:A:C	PsychENCODE	PsychENCODE_eQTLs	ENSG00000231541	C	0.000148207	0.241238	0.0118444	C	+	2	179745126	RPS6P2	1
2:179745150:C:T	PsychENCODE	PsychENCODE_eQTLs	ENSG00000231541	C	0.000148243	0.241239	0.011847	C	+	2	179745150	RPS6P2	1
2:179749054:A:G	PsychENCODE	PsychENCODE_eQTLs	ENSG00000231541	G	0.000223564	0.238329	0.0168457	G	+	2	179749054	RPS6P2	1
2:179750406:G:T	PsychENCODE	PsychENCODE_eQTLs	ENSG00000231541	G	0.00022853	0.233792	0.0171625	G	+	2	179750406	RPS6P2	1
2:179754103:C:T	PsychENCODE	PsychENCODE_eQTLs	ENSG00000231541	T	0.000388217	0.228643	0.0268103	T	+	2	179754103	RPS6P2	1
5:416118:A:G	PsychENCODE	PsychENCODE_eQTLs	ENSG00000066230	A	4.52298e-06	0.120118	0.000532123	A	+	5	416118	SLC9A3	1
5:416118:A:G	PsychENCODE	PsychENCODE_eQTLs	ENSG00000180104	A	1.14469e-14	-0.132458	4.13216758913474e-12	A	-	5	416118	EXOC3	1
5:416118:A:G	PsychENCODE	PsychENCODE_eQTLs	ENSG00000188818	A	2.47958e-09	-0.166902	5.01046428347253e-07	A	-	5	416118	ZDHHC11	1
5:416118:A:G	PsychENCODE	PsychENCODE_eQTLs	ENSG00000221990	A	3.64828e-16	0.138775	1.49569185799359e-13	A	+	5	416118	C5orf55	1
5:416118:A:G	PsychENCODE	PsychENCODE_eQTLs	ENSG00000225138	A	2.61022e-08	0.1268	4.55964631624408e-06	A	+	5	416118	CTD-2228K2.7	1
5:416672:A:G	PsychENCODE	PsychENCODE_eQTLs	ENSG00000066230	A	4.6699e-06	0.120008	0.0005478	A	+	5	416672	SLC9A3	1
5:416672:A:G	PsychENCODE	PsychENCODE_eQTLs	ENSG00000180104	A	1.75977e-14	-0.131605	6.24749670633487e-12	A	-	5	416672	EXOC3	1
5:416672:A:G	PsychENCODE	PsychENCODE_eQTLs	ENSG00000188818	A	1.84224e-09	-0.168326	3.7860832469226e-07	A	-	5	416672	ZDHHC11	1
5:416672:A:G	PsychENCODE	PsychENCODE_eQTLs	ENSG00000221990	A	3.42382e-16	0.138976	1.40679953399702e-13	A	+	5	416672	C5orf55	1
5:416672:A:G	PsychENCODE	PsychENCODE_eQTLs	ENSG00000225138	A	2.10218e-08	0.127715	3.72499957533288e-06	A	+	5	416672	CTD-2228K2.7	1
5:418494:A:G	PsychENCODE	PsychENCODE_eQTLs	ENSG00000066230	G	4.16612e-06	0.120566	0.000493837	G	+	5	418494	SLC9A3	1
5:418494:A:G	PsychENCODE	PsychENCODE_eQTLs	ENSG00000180104	G	1.39e-14	-0.132045	4.98005602647856e-12	G	-	5	418494	EXOC3	1
5:418494:A:G	PsychENCODE	PsychENCODE_eQTLs	ENSG00000188818	G	3.12524e-09	-0.165857	6.22965115039534e-07	G	-	5	418494	ZDHHC11	1
5:418494:A:G	PsychENCODE	PsychENCODE_eQTLs	ENSG00000221990	G	3.31529e-16	0.138969	1.36371549010026e-13	G	+	5	418494	C5orf55	1
5:418494:A:G	PsychENCODE	PsychENCODE_eQTLs	ENSG00000225138	G	1.5955e-08	0.128721	2.8785037506681e-06	G	+	5	418494	CTD-2228K2.7	1
5:421193:C:G	PsychENCODE	PsychENCODE_eQTLs	ENSG00000066230	C	4.25467e-06	0.114978	0.000503402	C	+	5	421193	SLC9A3	1
5:421193:C:G	PsychENCODE	PsychENCODE_eQTLs	ENSG00000180104	C	5.11227e-14	-0.123345	1.73684203849102e-11	C	-	5	421193	EXOC3	1
5:421193:C:G	PsychENCODE	PsychENCODE_eQTLs	ENSG00000188818	C	4.04927e-14	-0.201196	1.38900820061205e-11	C	-	5	421193	ZDHHC11	1
5:421193:C:G	PsychENCODE	PsychENCODE_eQTLs	ENSG00000221990	C	8.78623e-13	0.116512	2.65473141760806e-10	C	+	5	421193	C5orf55	1
5:421193:C:G	PsychENCODE	PsychENCODE_eQTLs	ENSG00000225138	C	9.86735e-09	0.124633	1.83667191615009e-06	C	+	5	421193	CTD-2228K2.7	1
5:421403:A:G	PsychENCODE	PsychENCODE_eQTLs	ENSG00000066230	A	4.33897e-06	0.121211	0.000512443	A	+	5	421403	SLC9A3	1
5:421403:A:G	PsychENCODE	PsychENCODE_eQTLs	ENSG00000180104	A	5.96817e-15	-0.134808	2.20634384608609e-12	A	-	5	421403	EXOC3	1
5:421403:A:G	PsychENCODE	PsychENCODE_eQTLs	ENSG00000188818	A	2.87169e-09	-0.167435	5.75317145569632e-07	A	-	5	421403	ZDHHC11	1
5:421403:A:G	PsychENCODE	PsychENCODE_eQTLs	ENSG00000221990	A	3.85983e-16	0.13966	1.57946326653937e-13	A	+	5	421403	C5orf55	1
5:421403:A:G	PsychENCODE	PsychENCODE_eQTLs	ENSG00000225138	A	4.40489e-08	0.125626	7.42956598922617e-06	A	+	5	421403	CTD-2228K2.7	1
5:421426:A:C	PsychENCODE	PsychENCODE_eQTLs	ENSG00000180104	C	3.37091e-09	-0.153753	6.68949920075009e-07	C	-	5	421426	EXOC3	1
5:421426:A:C	PsychENCODE	PsychENCODE_eQTLs	ENSG00000188242	C	1.13436e-05	0.122402	0.00122273	C	+	5	421426	CTD-2228K2.5	1
5:421426:A:C	PsychENCODE	PsychENCODE_eQTLs	ENSG00000221990	C	6.15537e-12	0.17733	1.70194508611953e-09	C	+	5	421426	C5orf55	1
5:421426:A:C	PsychENCODE	PsychENCODE_eQTLs	ENSG00000225138	C	1.96554e-43	-0.461816	3.39649401402428e-40	C	-	5	421426	CTD-2228K2.7	1
5:421455:G:T	PsychENCODE	PsychENCODE_eQTLs	ENSG00000066230	T	4.00563e-06	0.121495	0.000476526	T	+	5	421455	SLC9A3	1
5:421455:G:T	PsychENCODE	PsychENCODE_eQTLs	ENSG00000180104	T	4.94024e-15	-0.135041	1.83914954137513e-12	T	-	5	421455	EXOC3	1
5:421455:G:T	PsychENCODE	PsychENCODE_eQTLs	ENSG00000188818	T	4.29766e-09	-0.165378	8.41305026637952e-07	T	-	5	421455	ZDHHC11	1
5:421455:G:T	PsychENCODE	PsychENCODE_eQTLs	ENSG00000221990	T	4.54601e-16	0.139154	1.84968021177564e-13	T	+	5	421455	C5orf55	1
5:421455:G:T	PsychENCODE	PsychENCODE_eQTLs	ENSG00000225138	T	5.4827e-08	0.124587	9.10875132100165e-06	T	+	5	421455	CTD-2228K2.7	1
5:422178:A:G	PsychENCODE	PsychENCODE_eQTLs	ENSG00000180104	A	2.42908e-20	-0.151147	1.37213166078808e-17	A	-	5	422178	EXOC3	1
5:422178:A:G	PsychENCODE	PsychENCODE_eQTLs	ENSG00000188818	A	1.83295e-05	-0.115226	0.00188082	A	-	5	422178	ZDHHC11	1
5:422178:A:G	PsychENCODE	PsychENCODE_eQTLs	ENSG00000221990	A	1.97224e-20	0.150579	1.12178571523151e-17	A	+	5	422178	C5orf55	1
5:423169:C:T	PsychENCODE	PsychENCODE_eQTLs	ENSG00000180104	T	2.19307e-20	-0.150656	1.24334462292546e-17	T	-	5	423169	EXOC3	1
5:423169:C:T	PsychENCODE	PsychENCODE_eQTLs	ENSG00000188818	T	2.11315e-05	-0.113875	0.00213606	T	-	5	423169	ZDHHC11	1
5:423169:C:T	PsychENCODE	PsychENCODE_eQTLs	ENSG00000221990	T	4.67029e-21	0.152308	2.78376931235183e-18	T	+	5	423169	C5orf55	1
5:423169:C:T	PsychENCODE	PsychENCODE_eQTLs	ENSG00000268885	T	0.000714843	-0.0916621	0.0442004	T	-	5	423169	AC026740.1	1
5:423595:C:T	PsychENCODE	PsychENCODE_eQTLs	ENSG00000180104	T	1.94405e-20	-0.150605	1.10618046553834e-17	T	-	5	423595	EXOC3	1
5:423595:C:T	PsychENCODE	PsychENCODE_eQTLs	ENSG00000188818	T	1.85085e-05	-0.114469	0.0018973	T	-	5	423595	ZDHHC11	1
5:423595:C:T	PsychENCODE	PsychENCODE_eQTLs	ENSG00000221990	T	3.04701e-21	0.152751	1.84177622870243e-18	T	+	5	423595	C5orf55	1
5:429124:C:G	PsychENCODE	PsychENCODE_eQTLs	ENSG00000180104	G	3.65732e-20	-0.149649	2.04132113408453e-17	G	-	5	429124	EXOC3	1
5:429124:C:G	PsychENCODE	PsychENCODE_eQTLs	ENSG00000188818	G	2.87309e-05	-0.111926	0.0028078	G	-	5	429124	ZDHHC11	1
5:429124:C:G	PsychENCODE	PsychENCODE_eQTLs	ENSG00000221990	G	2.5851e-21	0.153133	1.57021943313906e-18	G	+	5	429124	C5orf55	1
5:429818:C:G	PsychENCODE	PsychENCODE_eQTLs	ENSG00000180104	G	3.73126e-20	-0.149681	2.0813494190389e-17	G	-	5	429818	EXOC3	1
5:429818:C:G	PsychENCODE	PsychENCODE_eQTLs	ENSG00000188818	G	3.14676e-05	-0.111424	0.00304392	G	-	5	429818	ZDHHC11	1
5:429818:C:G	PsychENCODE	PsychENCODE_eQTLs	ENSG00000221990	G	2.82445e-21	0.153055	1.71090359301187e-18	G	+	5	429818	C5orf55	1
5:429818:C:G	PsychENCODE	PsychENCODE_eQTLs	ENSG00000268885	G	0.00082621	-0.0905382	0.0496593	G	-	5	429818	AC026740.1	1
5:430059:A:G	PsychENCODE	PsychENCODE_eQTLs	ENSG00000180104	A	4.76449e-20	-0.149254	2.63756507629217e-17	A	-	5	430059	EXOC3	1
5:430059:A:G	PsychENCODE	PsychENCODE_eQTLs	ENSG00000188818	A	3.28617e-05	-0.111152	0.00316359	A	-	5	430059	ZDHHC11	1
5:430059:A:G	PsychENCODE	PsychENCODE_eQTLs	ENSG00000221990	A	4.92216e-21	0.152133	2.92843019484202e-18	A	+	5	430059	C5orf55	1
5:430217:C:T	PsychENCODE	PsychENCODE_eQTLs	ENSG00000180104	T	2.26119e-41	-0.199532	3.61736033095436e-38	T	-	5	430217	EXOC3	1
5:430217:C:T	PsychENCODE	PsychENCODE_eQTLs	ENSG00000188818	T	0.000149221	-0.0940166	0.0119143	T	-	5	430217	ZDHHC11	1
5:430217:C:T	PsychENCODE	PsychENCODE_eQTLs	ENSG00000221990	T	1.92841e-09	0.0906955	3.95339866303013e-07	T	+	5	430217	C5orf55	1
5:430217:C:T	PsychENCODE	PsychENCODE_eQTLs	ENSG00000225138	T	0.000778585	0.0677861	0.0473506	T	+	5	430217	CTD-2228K2.7	1
5:430217:C:T	PsychENCODE	PsychENCODE_eQTLs	ENSG00000268885	T	0.000455567	-0.0878432	0.0306115	T	-	5	430217	AC026740.1	1
5:434722:C:G	PsychENCODE	PsychENCODE_eQTLs	ENSG00000180104	C	2.36959e-19	-0.146133	1.24911038793968e-16	C	-	5	434722	EXOC3	1
5:434722:C:G	PsychENCODE	PsychENCODE_eQTLs	ENSG00000188818	C	2.54379e-05	-0.112421	0.00251962	C	-	5	434722	ZDHHC11	1
5:434722:C:G	PsychENCODE	PsychENCODE_eQTLs	ENSG00000221990	C	9.18083e-21	0.15073	5.34831104950353e-18	C	+	5	434722	C5orf55	1
5:434722:C:G	PsychENCODE	PsychENCODE_eQTLs	ENSG00000268885	C	0.000711812	-0.0914134	0.0440503	C	-	5	434722	AC026740.1	1
5:422178:A:G	DICE	T_CD4_naive_activated	ENSG00000180104	A	5.68859155733e-06	0.801343	0.049	A	+	5	422178	EXOC3	1
5:423169:C:T	DICE	T_CD4_naive_activated	ENSG00000180104	T	5.68859155733e-06	0.801343	0.049	T	+	5	423169	EXOC3	1
5:423595:C:T	DICE	T_CD4_naive_activated	ENSG00000180104	T	5.68859155733e-06	0.801343	0.049	T	+	5	423595	EXOC3	1
5:423671:C:T	DICE	T_CD4_naive_activated	ENSG00000180104	T	5.68859155733e-06	0.801343	0.049	T	+	5	423671	EXOC3	1
5:423906:A:G	DICE	T_CD4_naive_activated	ENSG00000180104	A	5.68859155733e-06	0.801343	0.049	A	+	5	423906	EXOC3	1
5:428236:A:C	DICE	T_CD4_naive_activated	ENSG00000180104	A	5.68859155733e-06	0.801343	0.049	A	+	5	428236	EXOC3	1
5:429124:C:G	DICE	T_CD4_naive_activated	ENSG00000180104	G	5.68859155733e-06	0.801343	0.049	G	+	5	429124	EXOC3	1
5:429818:C:G	DICE	T_CD4_naive_activated	ENSG00000180104	G	5.68859155733e-06	0.801343	0.049	G	+	5	429818	EXOC3	1
5:430059:A:G	DICE	T_CD4_naive_activated	ENSG00000180104	A	5.68859155733e-06	0.801343	0.049	A	+	5	430059	EXOC3	1
5:430217:C:T	DICE	T_CD4_naive_activated	ENSG00000225138	T	5.34265444004e-05	0.635438	0.049	T	+	5	430217	CTD-2228K2.7	1
5:434722:C:G	DICE	T_CD4_naive_activated	ENSG00000180104	C	1.77597735244e-05	0.74681	0.049	C	+	5	434722	EXOC3	1
5:437542:C:T	DICE	T_CD4_naive_activated	ENSG00000180104	C	5.68859155733e-06	0.801343	0.049	C	+	5	437542	EXOC3	1
5:437586:A:G	DICE	T_CD4_naive_activated	ENSG00000180104	A	5.68859155733e-06	0.801343	0.049	A	+	5	437586	EXOC3	1
5:437667:A:G	DICE	T_CD4_naive_activated	ENSG00000180104	A	5.68859155733e-06	0.801343	0.049	A	+	5	437667	EXOC3	1
5:437862:C:G	DICE	T_CD4_naive_activated	ENSG00000180104	C	5.68859155733e-06	0.801343	0.049	C	+	5	437862	EXOC3	1
5:430217:C:T	DICE	T_CD8_naive	ENSG00000066230	T	5.06294036263e-06	0.689658	0.049	T	+	5	430217	SLC9A3	1
5:430217:C:T	DICE	T_CD8_naive	ENSG00000225138	T	2.26216337556e-08	0.822313	0.049	T	+	5	430217	CTD-2228K2.7	1
5:430217:C:T	DICE	T_CD8_naive_activated	ENSG00000225138	T	4.80701105724e-05	0.630896	0.049	T	+	5	430217	CTD-2228K2.7	1
5:418093:A:G	DICE	Monocyte_classical	ENSG00000180104	G	4.19950794243e-05	-0.812866	0.049	G	-	5	418093	EXOC3	1
5:422178:A:G	DICE	NK	ENSG00000225138	A	2.07386314455e-05	0.742043	0.049	A	+	5	422178	CTD-2228K2.7	1
5:423169:C:T	DICE	NK	ENSG00000225138	T	2.07386314455e-05	0.742043	0.049	T	+	5	423169	CTD-2228K2.7	1
5:423595:C:T	DICE	NK	ENSG00000225138	T	2.07386314455e-05	0.742043	0.049	T	+	5	423595	CTD-2228K2.7	1
5:423671:C:T	DICE	NK	ENSG00000225138	T	2.07386314455e-05	0.742043	0.049	T	+	5	423671	CTD-2228K2.7	1
5:423906:A:G	DICE	NK	ENSG00000225138	A	2.07386314455e-05	0.742043	0.049	A	+	5	423906	CTD-2228K2.7	1
5:428236:A:C	DICE	NK	ENSG00000225138	A	2.07386314455e-05	0.742043	0.049	A	+	5	428236	CTD-2228K2.7	1
5:429124:C:G	DICE	NK	ENSG00000225138	G	2.07386314455e-05	0.742043	0.049	G	+	5	429124	CTD-2228K2.7	1
5:429818:C:G	DICE	NK	ENSG00000225138	G	2.07386314455e-05	0.742043	0.049	G	+	5	429818	CTD-2228K2.7	1
5:430059:A:G	DICE	NK	ENSG00000225138	A	2.07386314455e-05	0.742043	0.049	A	+	5	430059	CTD-2228K2.7	1
5:430217:C:T	DICE	NK	ENSG00000225138	T	2.27112638188e-08	0.814805	0.049	T	+	5	430217	CTD-2228K2.7	1
5:430217:C:T	DICE	NK	ENSG00000066230	T	1.51135235497e-05	0.654798	0.049	T	+	5	430217	SLC9A3	1
5:437542:C:T	DICE	NK	ENSG00000225138	C	2.07386314455e-05	0.742043	0.049	C	+	5	437542	CTD-2228K2.7	1
5:437586:A:G	DICE	NK	ENSG00000225138	A	2.07386314455e-05	0.742043	0.049	A	+	5	437586	CTD-2228K2.7	1
5:437667:A:G	DICE	NK	ENSG00000225138	A	2.07386314455e-05	0.742043	0.049	A	+	5	437667	CTD-2228K2.7	1
5:437862:C:G	DICE	NK	ENSG00000225138	C	2.07386314455e-05	0.742043	0.049	C	+	5	437862	CTD-2228K2.7	1
5:418093:A:G	DICE	T_CD4_TFH	ENSG00000180104	G	3.18846632488e-05	-0.832726	0.049	G	-	5	418093	EXOC3	1
5:418093:A:G	DICE	T_CD4_TFH	ENSG00000066230	G	2.82349354915e-05	-0.838967	0.049	G	-	5	418093	SLC9A3	1
5:430217:C:T	DICE	T_CD4_TH17	ENSG00000225138	T	8.72912415151e-05	0.596669	0.049	T	+	5	430217	CTD-2228K2.7	1
5:430217:C:T	DICE	T_CD4_TH1_17	ENSG00000225138	T	5.5065074864e-05	0.620438	0.049	T	+	5	430217	CTD-2228K2.7	1
5:418494:A:G	DICE	T_CD4_TH2	ENSG00000164366	G	3.64877738517e-05	0.752749	0.049	G	+	5	418494	CCDC127	1
5:430217:C:T	DICE	T_CD4_memory_TREG	ENSG00000225138	T	6.7646823352e-07	0.737583	0.049	T	+	5	430217	CTD-2228K2.7	1
5:430217:C:T	DICE	T_CD4_naive_TREG	ENSG00000225138	T	6.11136057643e-05	0.58647	0.049	T	+	5	430217	CTD-2228K2.7	1
2:68385097:A:G	eQTLGen	eQTLGen_cis_eQTLs	ENSG00000115956	A	5.5624e-13	-7.2108	0	G	+	2	68385097	PLEK	1
2:68385097:A:G	eQTLGen	eQTLGen_cis_eQTLs	ENSG00000119865	A	2.1523e-55	-15.6774	0	G	+	2	68385097	CNRIP1	1
2:68385097:A:G	eQTLGen	eQTLGen_cis_eQTLs	ENSG00000221823	A	3.27170000000001e-310	-39.2861	0	G	+	2	68385097	PPP3R1	1
2:68385097:A:G	eQTLGen	eQTLGen_cis_eQTLs	ENSG00000243667	A	1.6316e-92	20.4012	0	G	-	2	68385097	WDR92	1
2:68393144:A:T	eQTLGen	eQTLGen_cis_eQTLs	ENSG00000115956	T	1.6955e-15	-7.9617	0	A	+	2	68393144	PLEK	1
2:68393144:A:T	eQTLGen	eQTLGen_cis_eQTLs	ENSG00000119865	T	3.3117e-62	-16.6445	0	A	+	2	68393144	CNRIP1	1
2:68393144:A:T	eQTLGen	eQTLGen_cis_eQTLs	ENSG00000221823	T	3.27170000000001e-310	-39.831	0	A	+	2	68393144	PPP3R1	1
2:68393144:A:T	eQTLGen	eQTLGen_cis_eQTLs	ENSG00000243667	T	7.3497e-90	20.1003	0	A	-	2	68393144	WDR92	1
2:68394184:C:T	eQTLGen	eQTLGen_cis_eQTLs	ENSG00000115956	C	1.5238e-15	-7.9749	0	T	+	2	68394184	PLEK	1
2:68394184:C:T	eQTLGen	eQTLGen_cis_eQTLs	ENSG00000119865	C	5.1283e-62	-16.6182	0	T	+	2	68394184	CNRIP1	1
2:68394184:C:T	eQTLGen	eQTLGen_cis_eQTLs	ENSG00000221823	C	3.27170000000001e-310	-39.8457	0	T	+	2	68394184	PPP3R1	1
2:68394184:C:T	eQTLGen	eQTLGen_cis_eQTLs	ENSG00000243667	C	1.4929e-89	20.0652	0	T	-	2	68394184	WDR92	1
2:68395631:A:G	eQTLGen	eQTLGen_cis_eQTLs	ENSG00000115956	G	1.4421e-15	-7.9817	0	A	+	2	68395631	PLEK	1
2:68395631:A:G	eQTLGen	eQTLGen_cis_eQTLs	ENSG00000119865	G	5.0435e-62	-16.6192	0	A	+	2	68395631	CNRIP1	1
2:68395631:A:G	eQTLGen	eQTLGen_cis_eQTLs	ENSG00000221823	G	3.27170000000001e-310	-39.8397	0	A	+	2	68395631	PPP3R1	1
2:68395631:A:G	eQTLGen	eQTLGen_cis_eQTLs	ENSG00000243667	G	2.0677e-89	20.049	0	A	-	2	68395631	WDR92	1
2:68398919:C:G	eQTLGen	eQTLGen_cis_eQTLs	ENSG00000115956	G	2.2414e-15	-7.9272	0	C	+	2	68398919	PLEK	1
2:68398919:C:G	eQTLGen	eQTLGen_cis_eQTLs	ENSG00000119865	G	2.4187e-62	-16.6632	0	C	+	2	68398919	CNRIP1	1
2:68398919:C:G	eQTLGen	eQTLGen_cis_eQTLs	ENSG00000221823	G	3.27170000000001e-310	-39.8395	0	C	+	2	68398919	PPP3R1	1
2:68398919:C:G	eQTLGen	eQTLGen_cis_eQTLs	ENSG00000243667	G	1.151e-88	19.9633	0	C	-	2	68398919	WDR92	1
2:68399190:C:T	eQTLGen	eQTLGen_cis_eQTLs	ENSG00000115956	C	1.6522e-15	-7.965	0	T	+	2	68399190	PLEK	1
2:68399190:C:T	eQTLGen	eQTLGen_cis_eQTLs	ENSG00000119865	C	4.9435e-62	-16.6205	0	T	+	2	68399190	CNRIP1	1
2:68399190:C:T	eQTLGen	eQTLGen_cis_eQTLs	ENSG00000221823	C	3.27170000000001e-310	-39.7907	0	T	+	2	68399190	PPP3R1	1
2:68399190:C:T	eQTLGen	eQTLGen_cis_eQTLs	ENSG00000243667	C	9.8971e-88	19.8554	0	T	-	2	68399190	WDR92	1
2:68402012:G:T	eQTLGen	eQTLGen_cis_eQTLs	ENSG00000115956	G	2.5822e-15	-7.9095	0	T	+	2	68402012	PLEK	1
2:68402012:G:T	eQTLGen	eQTLGen_cis_eQTLs	ENSG00000119865	G	3.5593e-63	-16.7775	0	T	+	2	68402012	CNRIP1	1
2:68402012:G:T	eQTLGen	eQTLGen_cis_eQTLs	ENSG00000221823	G	3.27170000000001e-310	-39.9406	0	T	+	2	68402012	PPP3R1	1
2:68402012:G:T	eQTLGen	eQTLGen_cis_eQTLs	ENSG00000243667	G	3.6102e-88	19.9061	0	T	-	2	68402012	WDR92	1
2:68402830:C:G	eQTLGen	eQTLGen_cis_eQTLs	ENSG00000115956	G	2.5126e-15	-7.9128	0	C	+	2	68402830	PLEK	1
2:68402830:C:G	eQTLGen	eQTLGen_cis_eQTLs	ENSG00000119865	G	3.2136e-62	-16.6463	0	C	+	2	68402830	CNRIP1	1
2:68402830:C:G	eQTLGen	eQTLGen_cis_eQTLs	ENSG00000221823	G	3.27170000000001e-310	-39.8316	0	C	+	2	68402830	PPP3R1	1
2:68402830:C:G	eQTLGen	eQTLGen_cis_eQTLs	ENSG00000243667	G	1.7903e-87	19.8258	0	C	-	2	68402830	WDR92	1
2:68410372:A:C	eQTLGen	eQTLGen_cis_eQTLs	ENSG00000115956	C	5.2073e-15	-7.8218	0	A	+	2	68410372	PLEK	1
2:68410372:A:C	eQTLGen	eQTLGen_cis_eQTLs	ENSG00000119865	C	5.457e-63	-16.752	0	A	+	2	68410372	CNRIP1	1
2:68410372:A:C	eQTLGen	eQTLGen_cis_eQTLs	ENSG00000221823	C	3.27170000000001e-310	-40.0715	0	A	+	2	68410372	PPP3R1	1
2:68410372:A:C	eQTLGen	eQTLGen_cis_eQTLs	ENSG00000243667	C	2.0639e-88	19.934	0	A	-	2	68410372	WDR92	1
2:68410660:G:T	eQTLGen	eQTLGen_cis_eQTLs	ENSG00000115956	T	2.8251e-15	-7.8983	0	G	+	2	68410660	PLEK	1
2:68410660:G:T	eQTLGen	eQTLGen_cis_eQTLs	ENSG00000119865	T	2.5498e-63	-16.7973	0	G	+	2	68410660	CNRIP1	1
2:68410660:G:T	eQTLGen	eQTLGen_cis_eQTLs	ENSG00000221823	T	3.27170000000001e-310	-40.0331	0	G	+	2	68410660	PPP3R1	1
2:68410660:G:T	eQTLGen	eQTLGen_cis_eQTLs	ENSG00000243667	T	1.5538e-88	19.9482	0	G	-	2	68410660	WDR92	1
2:68411414:A:G	eQTLGen	eQTLGen_cis_eQTLs	ENSG00000115956	G	2.5905e-15	-7.9091	0	A	+	2	68411414	PLEK	1
2:68411414:A:G	eQTLGen	eQTLGen_cis_eQTLs	ENSG00000119865	G	2.5241e-63	-16.7979	0	A	+	2	68411414	CNRIP1	1
2:68411414:A:G	eQTLGen	eQTLGen_cis_eQTLs	ENSG00000221823	G	3.27170000000001e-310	-40.0325	0	A	+	2	68411414	PPP3R1	1
2:68411414:A:G	eQTLGen	eQTLGen_cis_eQTLs	ENSG00000243667	G	1.4003e-88	19.9535	0	A	-	2	68411414	WDR92	1
2:68418868:A:T	eQTLGen	eQTLGen_cis_eQTLs	ENSG00000115956	A	1.3961e-15	-7.9857	0	T	+	2	68418868	PLEK	1
2:68418868:A:T	eQTLGen	eQTLGen_cis_eQTLs	ENSG00000119865	A	4.2971e-62	-16.6289	0	T	+	2	68418868	CNRIP1	1
2:68418868:A:T	eQTLGen	eQTLGen_cis_eQTLs	ENSG00000221823	A	3.27170000000001e-310	-39.9111	0	T	+	2	68418868	PPP3R1	1
2:68418868:A:T	eQTLGen	eQTLGen_cis_eQTLs	ENSG00000243667	A	5.1696e-88	19.8881	0	T	-	2	68418868	WDR92	1
2:68419487:A:G	eQTLGen	eQTLGen_cis_eQTLs	ENSG00000115956	G	2.2632e-15	-7.9259	0	A	+	2	68419487	PLEK	1
2:68419487:A:G	eQTLGen	eQTLGen_cis_eQTLs	ENSG00000119865	G	7.7919e-63	-16.7309	0	A	+	2	68419487	CNRIP1	1
2:68419487:A:G	eQTLGen	eQTLGen_cis_eQTLs	ENSG00000221823	G	3.27170000000001e-310	-39.8007	0	A	+	2	68419487	PPP3R1	1
2:68419487:A:G	eQTLGen	eQTLGen_cis_eQTLs	ENSG00000243667	G	8.3458e-87	19.7482	0	A	-	2	68419487	WDR92	1
2:68420070:G:T	eQTLGen	eQTLGen_cis_eQTLs	ENSG00000115956	G	6.893e-16	-8.0723	0	T	+	2	68420070	PLEK	1
2:68420070:G:T	eQTLGen	eQTLGen_cis_eQTLs	ENSG00000119865	G	7.5492e-62	-16.5951	0	T	+	2	68420070	CNRIP1	1
2:68420070:G:T	eQTLGen	eQTLGen_cis_eQTLs	ENSG00000221823	G	3.27170000000001e-310	-39.9127	0	T	+	2	68420070	PPP3R1	1
2:68420070:G:T	eQTLGen	eQTLGen_cis_eQTLs	ENSG00000243667	G	8.9238e-88	19.8608	0	T	-	2	68420070	WDR92	1
2:68421049:A:G	eQTLGen	eQTLGen_cis_eQTLs	ENSG00000115956	G	1.2957e-15	-7.9948	0	A	+	2	68421049	PLEK	1
2:68421049:A:G	eQTLGen	eQTLGen_cis_eQTLs	ENSG00000119865	G	4.8133e-62	-16.6221	0	A	+	2	68421049	CNRIP1	1
2:68421049:A:G	eQTLGen	eQTLGen_cis_eQTLs	ENSG00000221823	G	3.27170000000001e-310	-39.9287	0	A	+	2	68421049	PPP3R1	1
2:68421049:A:G	eQTLGen	eQTLGen_cis_eQTLs	ENSG00000243667	G	6.7523e-88	19.8748	0	A	-	2	68421049	WDR92	1
2:68422771:A:G	eQTLGen	eQTLGen_cis_eQTLs	ENSG00000115956	G	1.3191e-15	-7.9927	0	A	+	2	68422771	PLEK	1
2:68422771:A:G	eQTLGen	eQTLGen_cis_eQTLs	ENSG00000119865	G	5.5742e-62	-16.6134	0	A	+	2	68422771	CNRIP1	1
2:68422771:A:G	eQTLGen	eQTLGen_cis_eQTLs	ENSG00000221823	G	3.27170000000001e-310	-39.9247	0	A	+	2	68422771	PPP3R1	1
2:68422771:A:G	eQTLGen	eQTLGen_cis_eQTLs	ENSG00000243667	G	6.4369e-88	19.877	0	A	-	2	68422771	WDR92	1
2:68423530:A:G	eQTLGen	eQTLGen_cis_eQTLs	ENSG00000115956	G	1.3063e-15	-7.9939	0	A	+	2	68423530	PLEK	1
2:68423530:A:G	eQTLGen	eQTLGen_cis_eQTLs	ENSG00000119865	G	5.32e-62	-16.6161	0	A	+	2	68423530	CNRIP1	1
2:68423530:A:G	eQTLGen	eQTLGen_cis_eQTLs	ENSG00000221823	G	3.27170000000001e-310	-39.9247	0	A	+	2	68423530	PPP3R1	1
2:68423530:A:G	eQTLGen	eQTLGen_cis_eQTLs	ENSG00000243667	G	6.2848e-88	19.8782	0	A	-	2	68423530	WDR92	1
2:68430925:C:T	eQTLGen	eQTLGen_cis_eQTLs	ENSG00000115956	C	1.3385e-15	-7.9909	0	T	+	2	68430925	PLEK	1
2:68430925:C:T	eQTLGen	eQTLGen_cis_eQTLs	ENSG00000119865	C	6.1401e-62	-16.6075	0	T	+	2	68430925	CNRIP1	1
2:68430925:C:T	eQTLGen	eQTLGen_cis_eQTLs	ENSG00000221823	C	3.27170000000001e-310	-39.8976	0	T	+	2	68430925	PPP3R1	1
2:68430925:C:T	eQTLGen	eQTLGen_cis_eQTLs	ENSG00000243667	C	3.6682e-88	19.9052	0	T	-	2	68430925	WDR92	1
2:68431259:A:G	eQTLGen	eQTLGen_cis_eQTLs	ENSG00000115956	G	1.726e-15	-7.9595	0	A	+	2	68431259	PLEK	1
2:68431259:A:G	eQTLGen	eQTLGen_cis_eQTLs	ENSG00000119865	G	4.2259e-62	-16.63	0	A	+	2	68431259	CNRIP1	1
2:68431259:A:G	eQTLGen	eQTLGen_cis_eQTLs	ENSG00000221823	G	3.27170000000001e-310	-39.9084	0	A	+	2	68431259	PPP3R1	1
2:68431259:A:G	eQTLGen	eQTLGen_cis_eQTLs	ENSG00000243667	G	8.3729e-88	19.864	0	A	-	2	68431259	WDR92	1
2:68433831:A:G	eQTLGen	eQTLGen_cis_eQTLs	ENSG00000115956	G	2.4606e-15	-7.9155	0	A	+	2	68433831	PLEK	1
2:68433831:A:G	eQTLGen	eQTLGen_cis_eQTLs	ENSG00000119865	G	1.9078e-63	-16.8145	0	A	+	2	68433831	CNRIP1	1
2:68433831:A:G	eQTLGen	eQTLGen_cis_eQTLs	ENSG00000221823	G	3.27170000000001e-310	-40.0269	0	A	+	2	68433831	PPP3R1	1
2:68433831:A:G	eQTLGen	eQTLGen_cis_eQTLs	ENSG00000243667	G	2.114e-88	19.933	0	A	-	2	68433831	WDR92	1
2:68435431:C:G	eQTLGen	eQTLGen_cis_eQTLs	ENSG00000115956	C	1.8442e-15	-7.9514	0	G	+	2	68435431	PLEK	1
2:68435431:C:G	eQTLGen	eQTLGen_cis_eQTLs	ENSG00000119865	C	3.0159e-62	-16.6501	0	G	+	2	68435431	CNRIP1	1
2:68435431:C:G	eQTLGen	eQTLGen_cis_eQTLs	ENSG00000221823	C	3.27170000000001e-310	-39.8857	0	G	+	2	68435431	PPP3R1	1
2:68435431:C:G	eQTLGen	eQTLGen_cis_eQTLs	ENSG00000243667	C	2.4606e-88	19.9252	0	G	-	2	68435431	WDR92	1
2:68438614:C:T	eQTLGen	eQTLGen_cis_eQTLs	ENSG00000115956	C	1.5018e-15	-7.9767	0	T	+	2	68438614	PLEK	1
2:68438614:C:T	eQTLGen	eQTLGen_cis_eQTLs	ENSG00000119865	C	1.4787e-62	-16.6928	0	T	+	2	68438614	CNRIP1	1
2:68438614:C:T	eQTLGen	eQTLGen_cis_eQTLs	ENSG00000221823	C	3.27170000000001e-310	-39.8401	0	T	+	2	68438614	PPP3R1	1
2:68438614:C:T	eQTLGen	eQTLGen_cis_eQTLs	ENSG00000243667	C	1.3508e-88	19.9552	0	T	-	2	68438614	WDR92	1
2:68439960:C:T	eQTLGen	eQTLGen_cis_eQTLs	ENSG00000115956	C	1.1158e-15	-8.0133	0	T	+	2	68439960	PLEK	1
2:68439960:C:T	eQTLGen	eQTLGen_cis_eQTLs	ENSG00000119865	C	2.0599e-62	-16.6728	0	T	+	2	68439960	CNRIP1	1
2:68439960:C:T	eQTLGen	eQTLGen_cis_eQTLs	ENSG00000221823	C	3.27170000000001e-310	-39.8149	0	T	+	2	68439960	PPP3R1	1
2:68439960:C:T	eQTLGen	eQTLGen_cis_eQTLs	ENSG00000243667	C	3.2673e-88	19.9111	0	T	-	2	68439960	WDR92	1
2:68443651:A:G	eQTLGen	eQTLGen_cis_eQTLs	ENSG00000115956	A	6.2676e-16	-8.0838	0	G	+	2	68443651	PLEK	1
2:68443651:A:G	eQTLGen	eQTLGen_cis_eQTLs	ENSG00000119865	A	5.32e-62	-16.6161	0	G	+	2	68443651	CNRIP1	1
2:68443651:A:G	eQTLGen	eQTLGen_cis_eQTLs	ENSG00000221823	A	3.27170000000001e-310	-39.7541	0	G	+	2	68443651	PPP3R1	1
2:68443651:A:G	eQTLGen	eQTLGen_cis_eQTLs	ENSG00000243667	A	3.5388e-88	19.9072	0	G	-	2	68443651	WDR92	1
2:68443835:A:T	eQTLGen	eQTLGen_cis_eQTLs	ENSG00000115956	A	6.8479e-16	-8.0731	0	T	+	2	68443835	PLEK	1
2:68443835:A:T	eQTLGen	eQTLGen_cis_eQTLs	ENSG00000119865	A	4.06e-62	-16.6323	0	T	+	2	68443835	CNRIP1	1
2:68443835:A:T	eQTLGen	eQTLGen_cis_eQTLs	ENSG00000221823	A	3.27170000000001e-310	-39.768	0	T	+	2	68443835	PPP3R1	1
2:68443835:A:T	eQTLGen	eQTLGen_cis_eQTLs	ENSG00000243667	A	5.9437e-88	19.8811	0	T	-	2	68443835	WDR92	1
2:68446936:C:T	eQTLGen	eQTLGen_cis_eQTLs	ENSG00000115956	C	2.5059e-16	-8.195	0	T	+	2	68446936	PLEK	1
2:68446936:C:T	eQTLGen	eQTLGen_cis_eQTLs	ENSG00000119865	C	5.0916e-61	-16.4801	0	T	+	2	68446936	CNRIP1	1
2:68446936:C:T	eQTLGen	eQTLGen_cis_eQTLs	ENSG00000221823	C	3.27170000000001e-310	-39.5628	0	T	+	2	68446936	PPP3R1	1
2:68446936:C:T	eQTLGen	eQTLGen_cis_eQTLs	ENSG00000243667	C	2.816e-87	19.8029	0	T	-	2	68446936	WDR92	1
2:68457573:C:T	eQTLGen	eQTLGen_cis_eQTLs	ENSG00000115956	C	3.9267e-16	-8.1408	0	T	+	2	68457573	PLEK	1
2:68457573:C:T	eQTLGen	eQTLGen_cis_eQTLs	ENSG00000119865	C	1.6964e-62	-16.6846	0	T	+	2	68457573	CNRIP1	1
2:68457573:C:T	eQTLGen	eQTLGen_cis_eQTLs	ENSG00000221823	C	3.27170000000001e-310	-39.6245	0	T	+	2	68457573	PPP3R1	1
2:68457573:C:T	eQTLGen	eQTLGen_cis_eQTLs	ENSG00000243667	C	3.4342e-87	19.7929	0	T	-	2	68457573	WDR92	1
2:68457854:A:G	eQTLGen	eQTLGen_cis_eQTLs	ENSG00000115956	A	2.6341e-16	-8.1889	0	G	+	2	68457854	PLEK	1
2:68457854:A:G	eQTLGen	eQTLGen_cis_eQTLs	ENSG00000119865	A	1.6441e-61	-16.5483	0	G	+	2	68457854	CNRIP1	1
2:68457854:A:G	eQTLGen	eQTLGen_cis_eQTLs	ENSG00000221823	A	3.27170000000001e-310	-39.4799	0	G	+	2	68457854	PPP3R1	1
2:68457854:A:G	eQTLGen	eQTLGen_cis_eQTLs	ENSG00000243667	A	1.071e-86	19.7355	0	G	-	2	68457854	WDR92	1
2:68463612:A:G	eQTLGen	eQTLGen_cis_eQTLs	ENSG00000115956	G	2.0081e-16	-8.2214	0	A	+	2	68463612	PLEK	1
2:68463612:A:G	eQTLGen	eQTLGen_cis_eQTLs	ENSG00000119865	G	4.0926e-61	-16.4933	0	A	+	2	68463612	CNRIP1	1
2:68463612:A:G	eQTLGen	eQTLGen_cis_eQTLs	ENSG00000221823	G	3.27170000000001e-310	-39.4795	0	A	+	2	68463612	PPP3R1	1
2:68463612:A:G	eQTLGen	eQTLGen_cis_eQTLs	ENSG00000243667	G	1.187e-86	19.7302	0	A	-	2	68463612	WDR92	1
2:68467910:A:C	eQTLGen	eQTLGen_cis_eQTLs	ENSG00000115956	A	1.1192e-16	-8.2912	0	C	+	2	68467910	PLEK	1
2:68467910:A:C	eQTLGen	eQTLGen_cis_eQTLs	ENSG00000119865	A	3.6689e-61	-16.4999	0	C	+	2	68467910	CNRIP1	1
2:68467910:A:C	eQTLGen	eQTLGen_cis_eQTLs	ENSG00000221823	A	3.27170000000001e-310	-39.4724	0	C	+	2	68467910	PPP3R1	1
2:68467910:A:C	eQTLGen	eQTLGen_cis_eQTLs	ENSG00000243667	A	2.6165e-86	19.6904	0	C	-	2	68467910	WDR92	1
2:68475595:A:C	eQTLGen	eQTLGen_cis_eQTLs	ENSG00000115956	C	2.1323e-16	-8.2142	0	A	+	2	68475595	PLEK	1
2:68475595:A:C	eQTLGen	eQTLGen_cis_eQTLs	ENSG00000119865	C	8.5108e-62	-16.5878	0	A	+	2	68475595	CNRIP1	1
2:68475595:A:C	eQTLGen	eQTLGen_cis_eQTLs	ENSG00000221823	C	3.27170000000001e-310	-39.4445	0	A	+	2	68475595	PPP3R1	1
2:68475595:A:C	eQTLGen	eQTLGen_cis_eQTLs	ENSG00000243667	C	3.8217e-86	19.6711	0	A	-	2	68475595	WDR92	1
2:68477248:C:T	eQTLGen	eQTLGen_cis_eQTLs	ENSG00000115956	T	1.9683e-16	-8.224	0	C	+	2	68477248	PLEK	1
2:68477248:C:T	eQTLGen	eQTLGen_cis_eQTLs	ENSG00000119865	T	3.755e-61	-16.4985	0	C	+	2	68477248	CNRIP1	1
2:68477248:C:T	eQTLGen	eQTLGen_cis_eQTLs	ENSG00000221823	T	3.27170000000001e-310	-39.329	0	C	+	2	68477248	PPP3R1	1
2:68477248:C:T	eQTLGen	eQTLGen_cis_eQTLs	ENSG00000243667	T	1.4577e-85	19.6032	0	C	-	2	68477248	WDR92	1
2:68478919:A:G	eQTLGen	eQTLGen_cis_eQTLs	ENSG00000115956	A	3.5677e-16	-8.1523	0	G	+	2	68478919	PLEK	1
2:68478919:A:G	eQTLGen	eQTLGen_cis_eQTLs	ENSG00000119865	A	8.6684e-61	-16.4479	0	G	+	2	68478919	CNRIP1	1
2:68478919:A:G	eQTLGen	eQTLGen_cis_eQTLs	ENSG00000221823	A	3.27170000000001e-310	-39.2187	0	G	+	2	68478919	PPP3R1	1
2:68478919:A:G	eQTLGen	eQTLGen_cis_eQTLs	ENSG00000243667	A	2.4007e-85	19.5776	0	G	-	2	68478919	WDR92	1
2:179603225:A:G	eQTLGen	eQTLGen_cis_eQTLs	ENSG00000180228	A	3.2244e-30	11.4227	0	A	+	2	179603225	PRKRA	1
2:179603225:A:G	eQTLGen	eQTLGen_cis_eQTLs	ENSG00000187231	A	3.3901e-10	-6.2797	0	A	-	2	179603225	SESTD1	1
2:179603225:A:G	eQTLGen	eQTLGen_cis_eQTLs	ENSG00000223960	A	3.3857e-15	7.8759	0	A	+	2	179603225	AC009948.5	1
2:179604160:G:T	eQTLGen	eQTLGen_cis_eQTLs	ENSG00000180228	G	1.3702e-29	11.2962	0	G	+	2	179604160	PRKRA	1
2:179604160:G:T	eQTLGen	eQTLGen_cis_eQTLs	ENSG00000187231	G	6.8723e-10	-6.1688	0	G	-	2	179604160	SESTD1	1
2:179604160:G:T	eQTLGen	eQTLGen_cis_eQTLs	ENSG00000223960	G	3.227e-15	7.8819	0	G	+	2	179604160	AC009948.5	1
2:179604366:G:T	eQTLGen	eQTLGen_cis_eQTLs	ENSG00000180228	G	1.7398e-29	11.2752	0	G	+	2	179604366	PRKRA	1
2:179604366:G:T	eQTLGen	eQTLGen_cis_eQTLs	ENSG00000187231	G	5.7476e-10	-6.1971	0	G	-	2	179604366	SESTD1	1
2:179604366:G:T	eQTLGen	eQTLGen_cis_eQTLs	ENSG00000223960	G	3.227e-15	7.8819	0	G	+	2	179604366	AC009948.5	1
2:179604742:A:G	eQTLGen	eQTLGen_cis_eQTLs	ENSG00000180228	A	2.8078e-29	11.2332	0	A	+	2	179604742	PRKRA	1
2:179604742:A:G	eQTLGen	eQTLGen_cis_eQTLs	ENSG00000187231	A	3.592e-10	-6.2707	0	A	-	2	179604742	SESTD1	1
2:179604742:A:G	eQTLGen	eQTLGen_cis_eQTLs	ENSG00000223960	A	3.227e-15	7.8819	0	A	+	2	179604742	AC009948.5	1
2:179605705:A:G	eQTLGen	eQTLGen_cis_eQTLs	ENSG00000180228	G	2.0817e-29	11.2595	0	G	+	2	179605705	PRKRA	1
2:179605705:A:G	eQTLGen	eQTLGen_cis_eQTLs	ENSG00000187231	G	4.3813e-10	-6.2398	0	G	-	2	179605705	SESTD1	1
2:179605705:A:G	eQTLGen	eQTLGen_cis_eQTLs	ENSG00000223960	G	2.5863e-15	7.9095	0	G	+	2	179605705	AC009948.5	1
2:179607487:C:T	eQTLGen	eQTLGen_cis_eQTLs	ENSG00000180228	C	2.2385e-29	11.2531	0	C	+	2	179607487	PRKRA	1
2:179607487:C:T	eQTLGen	eQTLGen_cis_eQTLs	ENSG00000187231	C	3.6902e-10	-6.2666	0	C	-	2	179607487	SESTD1	1
2:179607487:C:T	eQTLGen	eQTLGen_cis_eQTLs	ENSG00000223960	C	3.1103e-15	7.8865	0	C	+	2	179607487	AC009948.5	1
2:179609005:A:G	eQTLGen	eQTLGen_cis_eQTLs	ENSG00000180228	A	9.11e-30	11.3322	0	A	+	2	179609005	PRKRA	1
2:179609005:A:G	eQTLGen	eQTLGen_cis_eQTLs	ENSG00000187231	A	2.7121e-10	-6.3143	0	A	-	2	179609005	SESTD1	1
2:179609005:A:G	eQTLGen	eQTLGen_cis_eQTLs	ENSG00000223960	A	1.9545e-15	7.9443	0	A	+	2	179609005	AC009948.5	1
2:179609978:A:C	eQTLGen	eQTLGen_cis_eQTLs	ENSG00000180228	C	1.5922e-29	11.2832	0	C	+	2	179609978	PRKRA	1
2:179609978:A:C	eQTLGen	eQTLGen_cis_eQTLs	ENSG00000187231	C	3.22e-10	-6.2877	0	C	-	2	179609978	SESTD1	1
2:179609978:A:C	eQTLGen	eQTLGen_cis_eQTLs	ENSG00000223960	C	3.823e-15	7.8607	0	C	+	2	179609978	AC009948.5	1
2:179610009:G:T	eQTLGen	eQTLGen_cis_eQTLs	ENSG00000180228	G	2.1538e-29	11.2565	0	G	+	2	179610009	PRKRA	1
2:179610009:G:T	eQTLGen	eQTLGen_cis_eQTLs	ENSG00000187231	G	3.9296e-10	-6.2567	0	G	-	2	179610009	SESTD1	1
2:179610009:G:T	eQTLGen	eQTLGen_cis_eQTLs	ENSG00000223960	G	3.227e-15	7.8819	0	G	+	2	179610009	AC009948.5	1
2:179617370:C:T	eQTLGen	eQTLGen_cis_eQTLs	ENSG00000180228	C	2.4063e-30	11.4481	0	C	+	2	179617370	PRKRA	1
2:179617370:C:T	eQTLGen	eQTLGen_cis_eQTLs	ENSG00000187231	C	5.4558e-10	-6.2053	0	C	-	2	179617370	SESTD1	1
2:179617370:C:T	eQTLGen	eQTLGen_cis_eQTLs	ENSG00000223960	C	4.4768e-15	7.8409	0	C	+	2	179617370	AC009948.5	1
2:179622805:A:G	eQTLGen	eQTLGen_cis_eQTLs	ENSG00000180228	G	2.0711e-30	11.461	0	G	+	2	179622805	PRKRA	1
[truncated: 9,810 more rows]
