# Supplementary material for: Archaic Adaptive Introgression in Modern Human Reproductive Genes
Source: Research Square preprint supplement (doi:10.21203/rs.3.rs-5544119/v1), 2025-03-19
Supplement: Supplementary file 2 [file 0ca30bc8ab6f9d4b69351a2a.xlsx]

## Sheet: README
README: Genome-wide significant markers according to the IEU OpenGWAS project database. The Adjusted Effect Allele is also the archaic allele. Adjusted Archaic Beta is the new beta when referencing the archaic allele. The table is sorted in genomic order and the coordinates are in hg19 format.

## Sheet: Supplemental Table 4
Chromosome	Position	Variant	GeneID	EffectAllele	NonEffectAllele	ArchaicAllele	Beta	AdjustedEffectAllele	AdjustedNonEffectAllele	AdjustedArchaicBeta	P-Value	StandardError	NumberSamples	OpenGWASCode	Trait
2	68385097	rs2044693	PNO1	G	A	A	0.078	A	G	-0.078	7.34345e-11	0.012	NA	finn-b-FG_DISVEINLYMPH	Diseases of veins, lymphatic vessels and lymph nodes, not elsewhere classified (FINNGEN)
2	68385097	rs2044693	PNO1	G	A	A	0.0809	A	G	-0.0809	8.05564e-13	0.0113	NA	finn-b-I9_DISVEINLYMPH	Diseases of veins, lymphatic vessels and lymph nodes, not elsewhere classified
2	68385097	rs2044693	PNO1	G	A	A	0.1066	A	G	-0.1066	1.739e-13	0.0145	NA	finn-b-I9_VARICVE_EXNONE	Varicose veins (no controls excluded)
2	68385097	rs2044693	PNO1	G	A	A	0.1108	A	G	-0.1108	3.17176e-14	0.0146	NA	finn-b-I9_VARICVE	Varicose veins
2	68385097	rs2044693	PNO1	G	A	A	0.1378	A	G	-0.1378	1.27204e-34	0.0112	459702	ebi-a-GCST90018939	Varicose veins
2	68385097	rs2044693	PNO1	G	A	A	0.0100505	A	G	-0.0100505	7.43704e-10	0.0016325	810865	ebi-a-GCST90000062	Systolic blood pressure
2	68385097	rs2044693	PNO1	G	A	A	0.0121998	A	G	-0.0121998	8.60003e-09	0.00213016	469767	ebi-a-GCST90029011	Systolic blood pressure
2	68385097	rs2044693	PNO1	G	A	A	0.0123334	A	G	-0.0123334	5.69994e-09	0.00214402	422713	ebi-a-GCST90025968	Systolic blood pressure
2	68385097	rs2044693	PNO1	G	A	A	0.00163542	A	G	-0.00163542	1.80011e-17	0.000192257	463010	ukb-b-1765	Operative procedures - secondary OPCS: L87.1 Stripping of long saphenous vein
2	68385097	rs2044693	PNO1	G	A	A	0.00199674	A	G	-0.00199674	5.60015e-18	0.000231112	463010	ukb-b-14422	Operative procedures - main OPCS: L85.1 Ligation of long saphenous vein
2	68385097	rs2044693	PNO1	G	A	A	0.00227548	A	G	-0.00227548	3.59998e-19	0.000254295	463010	ukb-b-4363	Operative procedures - secondary OPCS: L87.4 Avulsion of varicose vein of leg
2	68385097	rs2044693	PNO1	G	A	A	0.00292186	A	G	-0.00292186	6.53732e-16	0.000361649	337199	ukb-a-538	Diagnoses - main ICD10: I83 Varicose veins of lower extremities
2	68385097	rs2044693	PNO1	G	A	A	0.00343359	A	G	-0.00343359	1.9002e-27	0.000316371	463010	ukb-b-6720	Diagnoses - main ICD10: I83.9 Varicose veins of lower extremities without ulcer or inflammation
2	68385097	rs2044693	PNO1	G	A	A	0.00348743	A	G	-0.00348743	1.71002e-15	0.000438058	361194	ukb-d-I9_DISVEINLYMPH	Diseases of veins, lymphatic vessels and lymph nodes, not elsewhere classified
2	68385097	rs2044693	PNO1	G	A	A	0.00603389	A	G	-0.00603389	3.59998e-45	0.000427795	462933	ukb-b-15592	Operation code: varicose vein surgery
2	68385097	rs2044693	PNO1	G	A	A	-0.0119242	A	G	0.0119242	1.79999e-09	0.00208809	458349	ebi-a-GCST90025996	Waist-to-hip ratio adjusted for BMI
2	68385097	rs2044693	PNO1	G	A	A	-0.0120528	A	G	0.0120528	9.59997e-10	0.00207443	502773	ebi-a-GCST90029009	Waist-hip ratio
2	68385097	rs2044693	PNO1	G	A	A	-0.00892645	A	G	0.00892645	7.00003e-09	0.00161975	458235	ebi-a-GCST90025949	Height
2	68393144	rs7340307	PNO1	A	T	T	0.0818	T	A	-0.0818	9.68501e-12	0.012	NA	finn-b-FG_DISVEINLYMPH	Diseases of veins, lymphatic vessels and lymph nodes, not elsewhere classified (FINNGEN)
2	68393144	rs7340307	PNO1	A	T	T	0.0849	T	A	-0.0849	6.69268e-14	0.0113	NA	finn-b-I9_DISVEINLYMPH	Diseases of veins, lymphatic vessels and lymph nodes, not elsewhere classified
2	68393144	rs7340307	PNO1	A	T	T	0.1112	T	A	-0.1112	1.90897e-14	0.0145	NA	finn-b-I9_VARICVE_EXNONE	Varicose veins (no controls excluded)
2	68393144	rs7340307	PNO1	A	T	T	0.1156	T	A	-0.1156	3.07326e-15	0.0147	NA	finn-b-I9_VARICVE	Varicose veins
2	68393144	rs7340307	PNO1	A	T	T	0.1391	T	A	-0.1391	1.07597e-34	0.0113	459702	ebi-a-GCST90018939	Varicose veins
2	68393144	rs7340307	PNO1	A	T	T	0.0019703	T	A	-0.0019703	3.10027e-17	0.000233321	463010	ukb-b-14422	Operative procedures - main OPCS: L85.1 Ligation of long saphenous vein
2	68393144	rs7340307	PNO1	A	T	T	0.0029549	T	A	-0.0029549	5.93745e-16	0.000365208	337199	ukb-a-538	Diagnoses - main ICD10: I83 Varicose veins of lower extremities
2	68393144	rs7340307	PNO1	A	T	T	0.00165187	T	A	-0.00165187	1.69981e-17	0.000194095	463010	ukb-b-1765	Operative procedures - secondary OPCS: L87.1 Stripping of long saphenous vein
2	68393144	rs7340307	PNO1	A	T	T	0.00232607	T	A	-0.00232607	1.29987e-19	0.000256725	463010	ukb-b-4363	Operative procedures - secondary OPCS: L87.4 Avulsion of varicose vein of leg
2	68393144	rs7340307	PNO1	A	T	T	0.00347041	T	A	-0.00347041	1.69981e-27	0.000319395	463010	ukb-b-6720	Diagnoses - main ICD10: I83.9 Varicose veins of lower extremities without ulcer or inflammation
2	68393144	rs7340307	PNO1	A	T	T	0.00353369	T	A	-0.00353369	1.36239e-15	0.00044231	361194	ukb-d-I9_DISVEINLYMPH	Diseases of veins, lymphatic vessels and lymph nodes, not elsewhere classified
2	68393144	rs7340307	PNO1	A	T	T	0.00615515	T	A	-0.00615515	4.40048e-46	0.000431882	462933	ukb-b-15592	Operation code: varicose vein surgery
2	68393144	rs7340307	PNO1	A	T	T	-0.0126651	T	A	0.0126651	2.39999e-10	0.00209412	502773	ebi-a-GCST90029009	Waist-hip ratio
2	68393144	rs7340307	PNO1	A	T	T	-0.00913755	T	A	0.00913755	2.19999e-09	0.00162407	673878	ebi-a-GCST90029008	Height
2	68394184	rs6756198	PNO1	T	C	C	0.0818	C	T	-0.0818	9.67609e-12	0.012	NA	finn-b-FG_DISVEINLYMPH	Diseases of veins, lymphatic vessels and lymph nodes, not elsewhere classified (FINNGEN)
2	68394184	rs6756198	PNO1	T	C	C	0.0849	C	T	-0.0849	6.66653e-14	0.0113	NA	finn-b-I9_DISVEINLYMPH	Diseases of veins, lymphatic vessels and lymph nodes, not elsewhere classified
2	68394184	rs6756198	PNO1	T	C	C	0.1112	C	T	-0.1112	1.94178e-14	0.0145	NA	finn-b-I9_VARICVE_EXNONE	Varicose veins (no controls excluded)
2	68394184	rs6756198	PNO1	T	C	C	0.1155	C	T	-0.1155	3.12104e-15	0.0147	NA	finn-b-I9_VARICVE	Varicose veins
2	68394184	rs6756198	PNO1	T	C	C	0.1394	C	T	-0.1394	7.76068e-35	0.0113	459702	ebi-a-GCST90018939	Varicose veins
2	68394184	rs6756198	PNO1	T	C	C	0.00165613	C	T	-0.00165613	1.39991e-17	0.000194004	463010	ukb-b-1765	Operative procedures - secondary OPCS: L87.1 Stripping of long saphenous vein
2	68394184	rs6756198	PNO1	T	C	C	0.00197298	C	T	-0.00197298	2.70023e-17	0.000233212	463010	ukb-b-14422	Operative procedures - main OPCS: L85.1 Ligation of long saphenous vein
2	68394184	rs6756198	PNO1	T	C	C	0.00233503	C	T	-0.00233503	9.09913e-20	0.000256605	463010	ukb-b-4363	Operative procedures - secondary OPCS: L87.4 Avulsion of varicose vein of leg
2	68394184	rs6756198	PNO1	T	C	C	0.00296486	C	T	-0.00296486	4.61105e-16	0.000365053	337199	ukb-a-538	Diagnoses - main ICD10: I83 Varicose veins of lower extremities
2	68394184	rs6756198	PNO1	T	C	C	0.00348664	C	T	-0.00348664	9.09913e-28	0.000319245	463010	ukb-b-6720	Diagnoses - main ICD10: I83.9 Varicose veins of lower extremities without ulcer or inflammation
2	68394184	rs6756198	PNO1	T	C	C	0.00354528	C	T	-0.00354528	1.0693e-15	0.000442111	361194	ukb-d-I9_DISVEINLYMPH	Diseases of veins, lymphatic vessels and lymph nodes, not elsewhere classified
2	68394184	rs6756198	PNO1	T	C	C	0.00616405	C	T	-0.00616405	2.90001e-46	0.000431679	462933	ukb-b-15592	Operation code: varicose vein surgery
2	68394184	rs6756198	PNO1	T	C	C	-0.0126387	C	T	0.0126387	2.80001e-10	0.00209316	502773	ebi-a-GCST90029009	Waist-hip ratio
2	68394184	rs6756198	PNO1	T	C	C	-0.00917389	C	T	0.00917389	1.89998e-09	0.00162333	673878	ebi-a-GCST90029008	Height
2	68395631	rs10173501	PNO1	A	G	G	0.0818	G	A	-0.0818	9.71181e-12	0.012	NA	finn-b-FG_DISVEINLYMPH	Diseases of veins, lymphatic vessels and lymph nodes, not elsewhere classified (FINNGEN)
2	68395631	rs10173501	PNO1	A	G	G	0.0849	G	A	-0.0849	6.66807e-14	0.0113	NA	finn-b-I9_DISVEINLYMPH	Diseases of veins, lymphatic vessels and lymph nodes, not elsewhere classified
2	68395631	rs10173501	PNO1	A	G	G	0.1111	G	A	-0.1111	1.99022e-14	0.0145	NA	finn-b-I9_VARICVE_EXNONE	Varicose veins (no controls excluded)
2	68395631	rs10173501	PNO1	A	G	G	0.1155	G	A	-0.1155	3.19521e-15	0.0147	NA	finn-b-I9_VARICVE	Varicose veins
2	68395631	rs10173501	PNO1	A	G	G	0.1391	G	A	-0.1391	1.05293e-34	0.0113	459702	ebi-a-GCST90018939	Varicose veins
2	68395631	rs10173501	PNO1	A	G	G	0.0034726	G	A	-0.0034726	1.50003e-27	0.00031936	463010	ukb-b-6720	Diagnoses - main ICD10: I83.9 Varicose veins of lower extremities without ulcer or inflammation
2	68395631	rs10173501	PNO1	A	G	G	0.00165404	G	A	-0.00165404	1.59993e-17	0.000194074	463010	ukb-b-1765	Operative procedures - secondary OPCS: L87.1 Stripping of long saphenous vein
2	68395631	rs10173501	PNO1	A	G	G	0.00197277	G	A	-0.00197277	2.80027e-17	0.000233295	463010	ukb-b-14422	Operative procedures - main OPCS: L85.1 Ligation of long saphenous vein
2	68395631	rs10173501	PNO1	A	G	G	0.00232723	G	A	-0.00232723	1.20005e-19	0.000256697	463010	ukb-b-4363	Operative procedures - secondary OPCS: L87.4 Avulsion of varicose vein of leg
2	68395631	rs10173501	PNO1	A	G	G	0.00295854	G	A	-0.00295854	5.43375e-16	0.000365171	337199	ukb-a-538	Diagnoses - main ICD10: I83 Varicose veins of lower extremities
2	68395631	rs10173501	PNO1	A	G	G	0.00353663	G	A	-0.00353663	1.28174e-15	0.000442262	361194	ukb-d-I9_DISVEINLYMPH	Diseases of veins, lymphatic vessels and lymph nodes, not elsewhere classified
2	68395631	rs10173501	PNO1	A	G	G	0.00614898	G	A	-0.00614898	5.19996e-46	0.000431834	462933	ukb-b-15592	Operation code: varicose vein surgery
2	68395631	rs10173501	PNO1	A	G	G	-0.0126505	G	A	0.0126505	2.5e-10	0.0020939	502773	ebi-a-GCST90029009	Waist-hip ratio
2	68395631	rs10173501	PNO1	A	G	G	-0.00916307	G	A	0.00916307	2.1e-09	0.0016239	673878	ebi-a-GCST90029008	Height
2	68398919	rs6716271	PNO1	C	G	G	0.0816	G	C	-0.0816	1.08293e-11	0.012	NA	finn-b-FG_DISVEINLYMPH	Diseases of veins, lymphatic vessels and lymph nodes, not elsewhere classified (FINNGEN)
2	68398919	rs6716271	PNO1	C	G	G	0.0841	G	C	-0.0841	1.13894e-13	0.0113	NA	finn-b-I9_DISVEINLYMPH	Diseases of veins, lymphatic vessels and lymph nodes, not elsewhere classified
2	68398919	rs6716271	PNO1	C	G	G	0.1115	G	C	-0.1115	1.61102e-14	0.0145	NA	finn-b-I9_VARICVE_EXNONE	Varicose veins (no controls excluded)
2	68398919	rs6716271	PNO1	C	G	G	0.1157	G	C	-0.1157	2.85693e-15	0.0146	NA	finn-b-I9_VARICVE	Varicose veins
2	68398919	rs6716271	PNO1	C	G	G	0.1395	G	C	-0.1395	6.53582e-35	0.0113	459702	ebi-a-GCST90018939	Varicose veins
2	68398919	rs6716271	PNO1	C	G	G	0.0035036	G	C	-0.0035036	4.90004e-28	0.000319137	463010	ukb-b-6720	Diagnoses - main ICD10: I83.9 Varicose veins of lower extremities without ulcer or inflammation
2	68398919	rs6716271	PNO1	C	G	G	0.00164986	G	C	-0.00164986	1.80011e-17	0.000193938	463010	ukb-b-1765	Operative procedures - secondary OPCS: L87.1 Stripping of long saphenous vein
2	68398919	rs6716271	PNO1	C	G	G	0.00197889	G	C	-0.00197889	2.09991e-17	0.000233132	463010	ukb-b-14422	Operative procedures - main OPCS: L85.1 Ligation of long saphenous vein
2	68398919	rs6716271	PNO1	C	G	G	0.00233384	G	C	-0.00233384	9.20026e-20	0.000256517	463010	ukb-b-4363	Operative procedures - secondary OPCS: L87.4 Avulsion of varicose vein of leg
2	68398919	rs6716271	PNO1	C	G	G	0.00298327	G	C	-0.00298327	2.99433e-16	0.000364972	337199	ukb-a-538	Diagnoses - main ICD10: I83 Varicose veins of lower extremities
2	68398919	rs6716271	PNO1	C	G	G	0.00356642	G	C	-0.00356642	7.1105e-16	0.000441991	361194	ukb-d-I9_DISVEINLYMPH	Diseases of veins, lymphatic vessels and lymph nodes, not elsewhere classified
2	68398919	rs6716271	PNO1	C	G	G	0.00613238	G	C	-0.00613238	7.89951e-46	0.000431532	462933	ukb-b-15592	Operation code: varicose vein surgery
2	68398919	rs6716271	PNO1	C	G	G	-0.0077	G	C	0.0077	6.91895e-09	0.0013	360388	ebi-a-GCST90018959	Height
2	68398919	rs6716271	PNO1	C	G	G	-0.0126041	G	C	0.0126041	2.99999e-10	0.00209255	502773	ebi-a-GCST90029009	Waist-hip ratio
2	68398919	rs6716271	PNO1	C	G	G	-0.00943335	G	C	0.00943335	7.19996e-10	0.00162285	673878	ebi-a-GCST90029008	Height
2	68399190	rs4671877	PNO1	T	C	C	0.109	C	T	-0.109	5.13098e-14	0.0145	NA	finn-b-I9_VARICVE_EXNONE	Varicose veins (no controls excluded)
2	68399190	rs4671877	PNO1	T	C	C	0.0802	C	T	-0.0802	2.11009e-11	0.012	NA	finn-b-FG_DISVEINLYMPH	Diseases of veins, lymphatic vessels and lymph nodes, not elsewhere classified (FINNGEN)
2	68399190	rs4671877	PNO1	T	C	C	0.0835	C	T	-0.0835	1.48013e-13	0.0113	NA	finn-b-I9_DISVEINLYMPH	Diseases of veins, lymphatic vessels and lymph nodes, not elsewhere classified
2	68399190	rs4671877	PNO1	T	C	C	0.1132	C	T	-0.1132	9.11381e-15	0.0146	NA	finn-b-I9_VARICVE	Varicose veins
2	68399190	rs4671877	PNO1	T	C	C	0.1395	C	T	-0.1395	3.6266e-35	0.0113	459702	ebi-a-GCST90018939	Varicose veins
2	68399190	rs4671877	PNO1	T	C	C	0.0109319	C	T	-0.0109319	8e-09	0.00182922	694866	ebi-a-GCST90028996	Mean platelet volume
2	68399190	rs4671877	PNO1	T	C	C	0.00163492	C	T	-0.00163492	2.99985e-17	0.000193568	463010	ukb-b-1765	Operative procedures - secondary OPCS: L87.1 Stripping of long saphenous vein
2	68399190	rs4671877	PNO1	T	C	C	0.00197465	C	T	-0.00197465	2.09991e-17	0.000232687	463010	ukb-b-14422	Operative procedures - main OPCS: L85.1 Ligation of long saphenous vein
2	68399190	rs4671877	PNO1	T	C	C	0.00231055	C	T	-0.00231055	1.80011e-19	0.000256028	463010	ukb-b-4363	Operative procedures - secondary OPCS: L87.4 Avulsion of varicose vein of leg
2	68399190	rs4671877	PNO1	T	C	C	0.00300496	C	T	-0.00300496	1.58526e-16	0.000364223	337199	ukb-a-538	Diagnoses - main ICD10: I83 Varicose veins of lower extremities
2	68399190	rs4671877	PNO1	T	C	C	0.00349731	C	T	-0.00349731	4.79954e-28	0.000318528	463010	ukb-b-6720	Diagnoses - main ICD10: I83.9 Varicose veins of lower extremities without ulcer or inflammation
2	68399190	rs4671877	PNO1	T	C	C	0.00359751	C	T	-0.00359751	3.48658e-16	0.000441111	361194	ukb-d-I9_DISVEINLYMPH	Diseases of veins, lymphatic vessels and lymph nodes, not elsewhere classified
2	68399190	rs4671877	PNO1	T	C	C	0.00614177	C	T	-0.00614177	3.90032e-46	0.000430709	462933	ukb-b-15592	Operation code: varicose vein surgery
2	68399190	rs4671877	PNO1	T	C	C	-0.0090358	C	T	0.0090358	3.40001e-09	0.00161977	673878	ebi-a-GCST90029008	Height
2	68399190	rs4671877	PNO1	T	C	C	-0.0128086	C	T	0.0128086	1.6e-10	0.00208858	502773	ebi-a-GCST90029009	Waist-hip ratio
2	68402012	rs1060842	PNO1	T	G	G	0.084	G	T	-0.084	1.18905e-13	0.0113	NA	finn-b-I9_DISVEINLYMPH	Diseases of veins, lymphatic vessels and lymph nodes, not elsewhere classified
2	68402012	rs1060842	PNO1	T	G	G	0.0814	G	T	-0.0814	1.17112e-11	0.012	NA	finn-b-FG_DISVEINLYMPH	Diseases of veins, lymphatic vessels and lymph nodes, not elsewhere classified (FINNGEN)
2	68402012	rs1060842	PNO1	T	G	G	0.1112	G	T	-0.1112	1.79102e-14	0.0145	NA	finn-b-I9_VARICVE_EXNONE	Varicose veins (no controls excluded)
2	68402012	rs1060842	PNO1	T	G	G	0.1154	G	T	-0.1154	3.15791e-15	0.0146	NA	finn-b-I9_VARICVE	Varicose veins
2	68402012	rs1060842	PNO1	T	G	G	0.1397	G	T	-0.1397	4.86407e-35	0.0113	459702	ebi-a-GCST90018939	Varicose veins
2	68402012	rs1060842	PNO1	T	G	G	0.0034985	G	T	-0.0034985	5.40008e-28	0.000318966	463010	ukb-b-6720	Diagnoses - main ICD10: I83.9 Varicose veins of lower extremities without ulcer or inflammation
2	68402012	rs1060842	PNO1	T	G	G	0.0116535	G	T	-0.0116535	3.29997e-09	0.00183695	445364	ebi-a-GCST90025960	Mean platelet volume
2	68402012	rs1060842	PNO1	T	G	G	0.0121149	G	T	-0.0121149	9.80009e-09	0.00215573	422713	ebi-a-GCST90025968	Systolic blood pressure
2	68402012	rs1060842	PNO1	T	G	G	0.00164917	G	T	-0.00164917	1.80011e-17	0.000193834	463010	ukb-b-1765	Operative procedures - secondary OPCS: L87.1 Stripping of long saphenous vein
2	68402012	rs1060842	PNO1	T	G	G	0.00197937	G	T	-0.00197937	1.99986e-17	0.000233008	463010	ukb-b-14422	Operative procedures - main OPCS: L85.1 Ligation of long saphenous vein
2	68402012	rs1060842	PNO1	T	G	G	0.00232186	G	T	-0.00232186	1.29987e-19	0.000256381	463010	ukb-b-4363	Operative procedures - secondary OPCS: L87.4 Avulsion of varicose vein of leg
2	68402012	rs1060842	PNO1	T	G	G	0.00298497	G	T	-0.00298497	2.76822e-16	0.000364758	337199	ukb-a-538	Diagnoses - main ICD10: I83 Varicose veins of lower extremities
2	68402012	rs1060842	PNO1	T	G	G	0.00358047	G	T	-0.00358047	5.28567e-16	0.000441754	361194	ukb-d-I9_DISVEINLYMPH	Diseases of veins, lymphatic vessels and lymph nodes, not elsewhere classified
2	68402012	rs1060842	PNO1	T	G	G	0.00611582	G	T	-0.00611582	1.20005e-45	0.000431302	462933	ukb-b-15592	Operation code: varicose vein surgery
2	68402012	rs1060842	PNO1	T	G	G	-0.0077	G	T	0.0077	5.03095e-09	0.0013	360388	ebi-a-GCST90018959	Height
2	68402012	rs1060842	PNO1	T	G	G	-0.0122404	G	T	0.0122404	1.2e-09	0.00210013	458349	ebi-a-GCST90025996	Waist-to-hip ratio adjusted for BMI
2	68402012	rs1060842	PNO1	T	G	G	-0.0126786	G	T	0.0126786	2.39999e-10	0.00209145	502773	ebi-a-GCST90029009	Waist-hip ratio
2	68402012	rs1060842	PNO1	T	G	G	-0.00930349	G	T	0.00930349	1.09999e-09	0.001622	673878	ebi-a-GCST90029008	Height
2	68402012	rs1060842	PNO1	T	G	G	-0.00933727	G	T	0.00933727	1.2e-09	0.00162911	458235	ebi-a-GCST90025949	Height
2	68402830	rs10197082	PNO1	C	G	G	0.00298	G	C	-0.00298	3.30598e-16	0.000365106	337199	ukb-a-538	Diagnoses - main ICD10: I83 Varicose veins of lower extremities
2	68402830	rs10197082	PNO1	C	G	G	0.0813	G	C	-0.0813	1.21703e-11	0.012	NA	finn-b-FG_DISVEINLYMPH	Diseases of veins, lymphatic vessels and lymph nodes, not elsewhere classified (FINNGEN)
2	68402830	rs10197082	PNO1	C	G	G	0.0839	G	C	-0.0839	1.24595e-13	0.0113	NA	finn-b-I9_DISVEINLYMPH	Diseases of veins, lymphatic vessels and lymph nodes, not elsewhere classified
2	68402830	rs10197082	PNO1	C	G	G	0.1112	G	C	-0.1112	1.84714e-14	0.0145	NA	finn-b-I9_VARICVE_EXNONE	Varicose veins (no controls excluded)
2	68402830	rs10197082	PNO1	C	G	G	0.1154	G	C	-0.1154	3.26588e-15	0.0146	NA	finn-b-I9_VARICVE	Varicose veins
2	68402830	rs10197082	PNO1	C	G	G	0.1394	G	C	-0.1394	7.72147e-35	0.0113	459702	ebi-a-GCST90018939	Varicose veins
2	68402830	rs10197082	PNO1	C	G	G	0.1822	G	C	-0.1822	8.92093e-09	0.0317	735413	ieu-b-38	systolic blood pressure
2	68402830	rs10197082	PNO1	C	G	G	0.0034973	G	C	-0.0034973	6.29941e-28	0.000319257	463010	ukb-b-6720	Diagnoses - main ICD10: I83.9 Varicose veins of lower extremities without ulcer or inflammation
2	68402830	rs10197082	PNO1	C	G	G	0.00165012	G	C	-0.00165012	1.80011e-17	0.000194011	463010	ukb-b-1765	Operative procedures - secondary OPCS: L87.1 Stripping of long saphenous vein
2	68402830	rs10197082	PNO1	C	G	G	0.00198059	G	C	-0.00198059	1.99986e-17	0.00023322	463010	ukb-b-14422	Operative procedures - main OPCS: L85.1 Ligation of long saphenous vein
2	68402830	rs10197082	PNO1	C	G	G	0.00232594	G	C	-0.00232594	1.29987e-19	0.000256614	463010	ukb-b-4363	Operative procedures - secondary OPCS: L87.4 Avulsion of varicose vein of leg
2	68402830	rs10197082	PNO1	C	G	G	0.00356363	G	C	-0.00356363	7.67715e-16	0.00044216	361194	ukb-d-I9_DISVEINLYMPH	Diseases of veins, lymphatic vessels and lymph nodes, not elsewhere classified
2	68402830	rs10197082	PNO1	C	G	G	0.00610602	G	C	-0.00610602	1.99986e-45	0.000431695	462933	ukb-b-15592	Operation code: varicose vein surgery
2	68402830	rs10197082	PNO1	C	G	G	-0.0077	G	C	0.0077	5.47596e-09	0.0013	360388	ebi-a-GCST90018959	Height
2	68402830	rs10197082	PNO1	C	G	G	-0.0125461	G	C	0.0125461	3.59998e-10	0.00209333	502773	ebi-a-GCST90029009	Waist-hip ratio
2	68402830	rs10197082	PNO1	C	G	G	-0.00943641	G	C	0.00943641	7.49998e-10	0.00162346	673878	ebi-a-GCST90029008	Height
2	68410372	rs11693063	ENSG00000273275	A	C	C	0.0825	C	A	-0.0825	5.98136e-12	0.012	NA	finn-b-FG_DISVEINLYMPH	Diseases of veins, lymphatic vessels and lymph nodes, not elsewhere classified (FINNGEN)
2	68410372	rs11693063	ENSG00000273275	A	C	C	0.0847	C	A	-0.0847	7.07946e-14	0.0113	NA	finn-b-I9_DISVEINLYMPH	Diseases of veins, lymphatic vessels and lymph nodes, not elsewhere classified
2	68410372	rs11693063	ENSG00000273275	A	C	C	0.1125	C	A	-0.1125	8.55067e-15	0.0145	NA	finn-b-I9_VARICVE_EXNONE	Varicose veins (no controls excluded)
2	68410372	rs11693063	ENSG00000273275	A	C	C	0.1167	C	A	-0.1167	1.54099e-15	0.0146	NA	finn-b-I9_VARICVE	Varicose veins
2	68410372	rs11693063	ENSG00000273275	A	C	C	0.1413	C	A	-0.1413	8.28705e-36	0.0113	459702	ebi-a-GCST90018939	Varicose veins
2	68410372	rs11693063	ENSG00000273275	A	C	C	0.00164885	C	A	-0.00164885	1.80011e-17	0.000193811	463010	ukb-b-1765	Operative procedures - secondary OPCS: L87.1 Stripping of long saphenous vein
2	68410372	rs11693063	ENSG00000273275	A	C	C	0.00198133	C	A	-0.00198133	1.80011e-17	0.00023298	463010	ukb-b-14422	Operative procedures - main OPCS: L85.1 Ligation of long saphenous vein
2	68410372	rs11693063	ENSG00000273275	A	C	C	0.00232527	C	A	-0.00232527	1.20005e-19	0.00025635	463010	ukb-b-4363	Operative procedures - secondary OPCS: L87.4 Avulsion of varicose vein of leg
2	68410372	rs11693063	ENSG00000273275	A	C	C	0.00299042	C	A	-0.00299042	2.42047e-16	0.000364704	337199	ukb-a-538	Diagnoses - main ICD10: I83 Varicose veins of lower extremities
2	68410372	rs11693063	ENSG00000273275	A	C	C	0.00350802	C	A	-0.00350802	3.80014e-28	0.000318928	463010	ukb-b-6720	Diagnoses - main ICD10: I83.9 Varicose veins of lower extremities without ulcer or inflammation
2	68410372	rs11693063	ENSG00000273275	A	C	C	0.00359463	C	A	-0.00359463	4.01883e-16	0.000441688	361194	ukb-d-I9_DISVEINLYMPH	Diseases of veins, lymphatic vessels and lymph nodes, not elsewhere classified
2	68410372	rs11693063	ENSG00000273275	A	C	C	0.00612834	C	A	-0.00612834	7.89951e-46	0.000431251	462933	ukb-b-15592	Operation code: varicose vein surgery
2	68410372	rs11693063	ENSG00000273275	A	C	C	-0.0079	C	A	0.0079	2.15001e-09	0.0013	360388	ebi-a-GCST90018959	Height
2	68410372	rs11693063	ENSG00000273275	A	C	C	-0.0126713	C	A	0.0126713	2.5e-10	0.00209121	502773	ebi-a-GCST90029009	Waist-hip ratio
2	68410372	rs11693063	ENSG00000273275	A	C	C	-0.00930251	C	A	0.00930251	1.2e-09	0.00162181	673878	ebi-a-GCST90029008	Height
2	68410660	rs6757991	ENSG00000273275	G	T	T	0.0804	T	G	-0.0804	2.06395e-11	0.012	NA	finn-b-FG_DISVEINLYMPH	Diseases of veins, lymphatic vessels and lymph nodes, not elsewhere classified (FINNGEN)
2	68410660	rs6757991	ENSG00000273275	G	T	T	0.0832	T	G	-0.0832	1.99802e-13	0.0113	NA	finn-b-I9_DISVEINLYMPH	Diseases of veins, lymphatic vessels and lymph nodes, not elsewhere classified
2	68410660	rs6757991	ENSG00000273275	G	T	T	0.1099	T	G	-0.1099	3.73336e-14	0.0145	NA	finn-b-I9_VARICVE_EXNONE	Varicose veins (no controls excluded)
2	68410660	rs6757991	ENSG00000273275	G	T	T	0.1141	T	G	-0.1141	6.4759e-15	0.0146	NA	finn-b-I9_VARICVE	Varicose veins
2	68410660	rs6757991	ENSG00000273275	G	T	T	0.1399	T	G	-0.1399	3.77485e-35	0.0113	459702	ebi-a-GCST90018939	Varicose veins
2	68410660	rs6757991	ENSG00000273275	G	T	T	0.0035072	T	G	-0.0035072	4.00037e-28	0.000318927	463010	ukb-b-6720	Diagnoses - main ICD10: I83.9 Varicose veins of lower extremities without ulcer or inflammation
2	68410660	rs6757991	ENSG00000273275	G	T	T	0.00164871	T	G	-0.00164871	1.80011e-17	0.000193811	463010	ukb-b-1765	Operative procedures - secondary OPCS: L87.1 Stripping of long saphenous vein
2	68410660	rs6757991	ENSG00000273275	G	T	T	0.00198128	T	G	-0.00198128	1.80011e-17	0.00023298	463010	ukb-b-14422	Operative procedures - main OPCS: L85.1 Ligation of long saphenous vein
2	68410660	rs6757991	ENSG00000273275	G	T	T	0.00232521	T	G	-0.00232521	1.20005e-19	0.000256349	463010	ukb-b-4363	Operative procedures - secondary OPCS: L87.4 Avulsion of varicose vein of leg
2	68410660	rs6757991	ENSG00000273275	G	T	T	0.00299023	T	G	-0.00299023	2.43164e-16	0.000364705	337199	ukb-a-538	Diagnoses - main ICD10: I83 Varicose veins of lower extremities
2	68410660	rs6757991	ENSG00000273275	G	T	T	0.00359359	T	G	-0.00359359	4.09732e-16	0.000441689	361194	ukb-d-I9_DISVEINLYMPH	Diseases of veins, lymphatic vessels and lymph nodes, not elsewhere classified
2	68410660	rs6757991	ENSG00000273275	G	T	T	0.00612765	T	G	-0.00612765	8.10028e-46	0.000431249	462933	ukb-b-15592	Operation code: varicose vein surgery
2	68410660	rs6757991	ENSG00000273275	G	T	T	-0.0079	T	G	0.0079	2.256e-09	0.0013	360388	ebi-a-GCST90018959	Height
2	68410660	rs6757991	ENSG00000273275	G	T	T	-0.0126845	T	G	0.0126845	2.39999e-10	0.0020912	502773	ebi-a-GCST90029009	Waist-hip ratio
2	68410660	rs6757991	ENSG00000273275	G	T	T	-0.00931222	T	G	0.00931222	1.2e-09	0.0016218	673878	ebi-a-GCST90029008	Height
2	68411414	rs6546358	ENSG00000273275	A	G	G	0.0813	G	A	-0.0813	1.25199e-11	0.012	NA	finn-b-FG_DISVEINLYMPH	Diseases of veins, lymphatic vessels and lymph nodes, not elsewhere classified (FINNGEN)
2	68411414	rs6546358	ENSG00000273275	A	G	G	0.0839	G	A	-0.0839	1.27204e-13	0.0113	NA	finn-b-I9_DISVEINLYMPH	Diseases of veins, lymphatic vessels and lymph nodes, not elsewhere classified
2	68411414	rs6546358	ENSG00000273275	A	G	G	0.1111	G	A	-0.1111	1.90108e-14	0.0145	NA	finn-b-I9_VARICVE_EXNONE	Varicose veins (no controls excluded)
2	68411414	rs6546358	ENSG00000273275	A	G	G	0.1153	G	A	-0.1153	3.36822e-15	0.0146	NA	finn-b-I9_VARICVE	Varicose veins
2	68411414	rs6546358	ENSG00000273275	A	G	G	0.1406	G	A	-0.1406	1.95389e-35	0.0113	459702	ebi-a-GCST90018939	Varicose veins
2	68411414	rs6546358	ENSG00000273275	A	G	G	0.00165268	G	A	-0.00165268	1.50003e-17	0.00019389	463010	ukb-b-1765	Operative procedures - secondary OPCS: L87.1 Stripping of long saphenous vein
2	68411414	rs6546358	ENSG00000273275	A	G	G	0.00197971	G	A	-0.00197971	1.99986e-17	0.000233075	463010	ukb-b-14422	Operative procedures - main OPCS: L85.1 Ligation of long saphenous vein
2	68411414	rs6546358	ENSG00000273275	A	G	G	0.00233449	G	A	-0.00233449	8.80035e-20	0.000256454	463010	ukb-b-4363	Operative procedures - secondary OPCS: L87.4 Avulsion of varicose vein of leg
2	68411414	rs6546358	ENSG00000273275	A	G	G	0.00299954	G	A	-0.00299954	2.02722e-16	0.000364869	337199	ukb-a-538	Diagnoses - main ICD10: I83 Varicose veins of lower extremities
2	68411414	rs6546358	ENSG00000273275	A	G	G	0.00351544	G	A	-0.00351544	3.10027e-28	0.000319058	463010	ukb-b-6720	Diagnoses - main ICD10: I83.9 Varicose veins of lower extremities without ulcer or inflammation
2	68411414	rs6546358	ENSG00000273275	A	G	G	0.00359182	G	A	-0.00359182	4.35612e-16	0.000441875	361194	ukb-d-I9_DISVEINLYMPH	Diseases of veins, lymphatic vessels and lymph nodes, not elsewhere classified
2	68411414	rs6546358	ENSG00000273275	A	G	G	0.00614434	G	A	-0.00614434	5.00035e-46	0.000431426	462933	ukb-b-15592	Operation code: varicose vein surgery
2	68411414	rs6546358	ENSG00000273275	A	G	G	-0.0079	G	A	0.0079	2.39701e-09	0.0013	360388	ebi-a-GCST90018959	Height
2	68411414	rs6546358	ENSG00000273275	A	G	G	-0.0125598	G	A	0.0125598	3.50002e-10	0.00209205	502773	ebi-a-GCST90029009	Waist-hip ratio
2	68411414	rs6546358	ENSG00000273275	A	G	G	-0.00937879	G	A	0.00937879	9.90011e-10	0.00162246	673878	ebi-a-GCST90029008	Height
2	68418868	rs10191352	PPP3R1	T	A	A	0.141	A	T	-0.141	1.25199e-35	0.0113	459702	ebi-a-GCST90018939	Varicose veins
2	68418868	rs10191352	PPP3R1	T	A	A	0.0816	A	T	-0.0816	1.04689e-11	0.012	NA	finn-b-FG_DISVEINLYMPH	Diseases of veins, lymphatic vessels and lymph nodes, not elsewhere classified (FINNGEN)
2	68418868	rs10191352	PPP3R1	T	A	A	0.0842	A	T	-0.0842	1.04208e-13	0.0113	NA	finn-b-I9_DISVEINLYMPH	Diseases of veins, lymphatic vessels and lymph nodes, not elsewhere classified
2	68418868	rs10191352	PPP3R1	T	A	A	0.1113	A	T	-0.1113	1.70294e-14	0.0145	NA	finn-b-I9_VARICVE_EXNONE	Varicose veins (no controls excluded)
2	68418868	rs10191352	PPP3R1	T	A	A	0.1155	A	T	-0.1155	2.97989e-15	0.0146	NA	finn-b-I9_VARICVE	Varicose veins
2	68418868	rs10191352	PPP3R1	T	A	A	0.0016528	A	T	-0.0016528	1.59993e-17	0.000193916	463010	ukb-b-1765	Operative procedures - secondary OPCS: L87.1 Stripping of long saphenous vein
2	68418868	rs10191352	PPP3R1	T	A	A	0.00198402	A	T	-0.00198402	1.69981e-17	0.000233106	463010	ukb-b-14422	Operative procedures - main OPCS: L85.1 Ligation of long saphenous vein
2	68418868	rs10191352	PPP3R1	T	A	A	0.00233828	A	T	-0.00233828	7.8001e-20	0.000256489	463010	ukb-b-4363	Operative procedures - secondary OPCS: L87.4 Avulsion of varicose vein of leg
2	68418868	rs10191352	PPP3R1	T	A	A	0.00300237	A	T	-0.00300237	1.91646e-16	0.000364915	337199	ukb-a-538	Diagnoses - main ICD10: I83 Varicose veins of lower extremities
2	68418868	rs10191352	PPP3R1	T	A	A	0.00352116	A	T	-0.00352116	2.60016e-28	0.000319101	463010	ukb-b-6720	Diagnoses - main ICD10: I83.9 Varicose veins of lower extremities without ulcer or inflammation
2	68418868	rs10191352	PPP3R1	T	A	A	0.00360104	A	T	-0.00360104	3.69658e-16	0.000441927	361194	ukb-d-I9_DISVEINLYMPH	Diseases of veins, lymphatic vessels and lymph nodes, not elsewhere classified
2	68418868	rs10191352	PPP3R1	T	A	A	0.00614575	A	T	-0.00614575	4.90004e-46	0.000431484	462933	ukb-b-15592	Operation code: varicose vein surgery
2	68418868	rs10191352	PPP3R1	T	A	A	-0.0079	A	T	0.0079	2.86603e-09	0.0013	360388	ebi-a-GCST90018959	Height
2	68418868	rs10191352	PPP3R1	T	A	A	-0.0125704	A	T	0.0125704	3.40001e-10	0.00209233	502773	ebi-a-GCST90029009	Waist-hip ratio
2	68418868	rs10191352	PPP3R1	T	A	A	-0.00936018	A	T	0.00936018	1.09999e-09	0.00162268	673878	ebi-a-GCST90029008	Height
2	68419487	rs6757863	PPP3R1	A	G	G	0.0815	G	A	-0.0815	1.08993e-11	0.012	NA	finn-b-FG_DISVEINLYMPH	Diseases of veins, lymphatic vessels and lymph nodes, not elsewhere classified (FINNGEN)
2	68419487	rs6757863	PPP3R1	A	G	G	0.0842	G	A	-0.0842	1.05003e-13	0.0113	NA	finn-b-I9_DISVEINLYMPH	Diseases of veins, lymphatic vessels and lymph nodes, not elsewhere classified
2	68419487	rs6757863	PPP3R1	A	G	G	0.1112	G	A	-0.1112	1.75914e-14	0.0145	NA	finn-b-I9_VARICVE_EXNONE	Varicose veins (no controls excluded)
2	68419487	rs6757863	PPP3R1	A	G	G	0.1155	G	A	-0.1155	3.04089e-15	0.0146	NA	finn-b-I9_VARICVE	Varicose veins
2	68419487	rs6757863	PPP3R1	A	G	G	0.1409	G	A	-0.1409	1.37214e-35	0.0113	459702	ebi-a-GCST90018939	Varicose veins
2	68419487	rs6757863	PPP3R1	A	G	G	0.0035194	G	A	-0.0035194	2.80027e-28	0.000319113	463010	ukb-b-6720	Diagnoses - main ICD10: I83.9 Varicose veins of lower extremities without ulcer or inflammation
2	68419487	rs6757863	PPP3R1	A	G	G	0.00165312	G	A	-0.00165312	1.50003e-17	0.000193923	463010	ukb-b-1765	Operative procedures - secondary OPCS: L87.1 Stripping of long saphenous vein
2	68419487	rs6757863	PPP3R1	A	G	G	0.00198563	G	A	-0.00198563	1.59993e-17	0.000233115	463010	ukb-b-14422	Operative procedures - main OPCS: L85.1 Ligation of long saphenous vein
2	68419487	rs6757863	PPP3R1	A	G	G	0.00234049	G	A	-0.00234049	7.19946e-20	0.000256498	463010	ukb-b-4363	Operative procedures - secondary OPCS: L87.4 Avulsion of varicose vein of leg
2	68419487	rs6757863	PPP3R1	A	G	G	0.00299883	G	A	-0.00299883	2.08449e-16	0.00036493	337199	ukb-a-538	Diagnoses - main ICD10: I83 Varicose veins of lower extremities
2	68419487	rs6757863	PPP3R1	A	G	G	0.00360018	G	A	-0.00360018	3.76791e-16	0.000441947	361194	ukb-d-I9_DISVEINLYMPH	Diseases of veins, lymphatic vessels and lymph nodes, not elsewhere classified
2	68419487	rs6757863	PPP3R1	A	G	G	0.00614092	G	A	-0.00614092	5.79963e-46	0.0004315	462933	ukb-b-15592	Operation code: varicose vein surgery
2	68419487	rs6757863	PPP3R1	A	G	G	-0.0079	G	A	0.0079	2.84603e-09	0.0013	360388	ebi-a-GCST90018959	Height
2	68419487	rs6757863	PPP3R1	A	G	G	-0.0125532	G	A	0.0125532	3.50002e-10	0.00209241	502773	ebi-a-GCST90029009	Waist-hip ratio
2	68419487	rs6757863	PPP3R1	A	G	G	-0.00936646	G	A	0.00936646	1.09999e-09	0.00162274	673878	ebi-a-GCST90029008	Height
2	68420070	rs6761378	PPP3R1	T	G	G	0.0816	G	T	-0.0816	1.04112e-11	0.012	NA	finn-b-FG_DISVEINLYMPH	Diseases of veins, lymphatic vessels and lymph nodes, not elsewhere classified (FINNGEN)
2	68420070	rs6761378	PPP3R1	T	G	G	0.0842	G	T	-0.0842	1.0361e-13	0.0113	NA	finn-b-I9_DISVEINLYMPH	Diseases of veins, lymphatic vessels and lymph nodes, not elsewhere classified
2	68420070	rs6761378	PPP3R1	T	G	G	0.1113	G	T	-0.1113	1.6959e-14	0.0145	NA	finn-b-I9_VARICVE_EXNONE	Varicose veins (no controls excluded)
2	68420070	rs6761378	PPP3R1	T	G	G	0.1155	G	T	-0.1155	2.9662e-15	0.0146	NA	finn-b-I9_VARICVE	Varicose veins
2	68420070	rs6761378	PPP3R1	T	G	G	0.1409	G	T	-0.1409	1.35894e-35	0.0113	459702	ebi-a-GCST90018939	Varicose veins
2	68420070	rs6761378	PPP3R1	T	G	G	0.00165311	G	T	-0.00165311	1.50003e-17	0.000193925	463010	ukb-b-1765	Operative procedures - secondary OPCS: L87.1 Stripping of long saphenous vein
2	68420070	rs6761378	PPP3R1	T	G	G	0.00198595	G	T	-0.00198595	1.59993e-17	0.000233117	463010	ukb-b-14422	Operative procedures - main OPCS: L85.1 Ligation of long saphenous vein
2	68420070	rs6761378	PPP3R1	T	G	G	0.00234073	G	T	-0.00234073	7.10068e-20	0.000256501	463010	ukb-b-4363	Operative procedures - secondary OPCS: L87.4 Avulsion of varicose vein of leg
2	68420070	rs6761378	PPP3R1	T	G	G	0.00299895	G	T	-0.00299895	2.08018e-16	0.000364935	337199	ukb-a-538	Diagnoses - main ICD10: I83 Varicose veins of lower extremities
2	68420070	rs6761378	PPP3R1	T	G	G	0.00351968	G	T	-0.00351968	2.80027e-28	0.000319116	463010	ukb-b-6720	Diagnoses - main ICD10: I83.9 Varicose veins of lower extremities without ulcer or inflammation
2	68420070	rs6761378	PPP3R1	T	G	G	0.00360072	G	T	-0.00360072	3.7325e-16	0.000441952	361194	ukb-d-I9_DISVEINLYMPH	Diseases of veins, lymphatic vessels and lymph nodes, not elsewhere classified
2	68420070	rs6761378	PPP3R1	T	G	G	0.00613963	G	T	-0.00613963	6.09958e-46	0.000431504	462933	ukb-b-15592	Operation code: varicose vein surgery
2	68420070	rs6761378	PPP3R1	T	G	G	-0.0079	G	T	0.0079	2.87098e-09	0.0013	360388	ebi-a-GCST90018959	Height
2	68420070	rs6761378	PPP3R1	T	G	G	-0.0125568	G	T	0.0125568	3.50002e-10	0.00209243	502773	ebi-a-GCST90029009	Waist-hip ratio
2	68420070	rs6761378	PPP3R1	T	G	G	-0.00936662	G	T	0.00936662	1.09999e-09	0.00162276	673878	ebi-a-GCST90029008	Height
2	68421049	rs9677635	PPP3R1	A	G	G	0.0815	G	A	-0.0815	1.08094e-11	0.012	NA	finn-b-FG_DISVEINLYMPH	Diseases of veins, lymphatic vessels and lymph nodes, not elsewhere classified (FINNGEN)
2	68421049	rs9677635	PPP3R1	A	G	G	0.0842	G	A	-0.0842	1.03992e-13	0.0113	NA	finn-b-I9_DISVEINLYMPH	Diseases of veins, lymphatic vessels and lymph nodes, not elsewhere classified
2	68421049	rs9677635	PPP3R1	A	G	G	0.1112	G	A	-0.1112	1.74783e-14	0.0145	NA	finn-b-I9_VARICVE_EXNONE	Varicose veins (no controls excluded)
2	68421049	rs9677635	PPP3R1	A	G	G	0.1155	G	A	-0.1155	3.02134e-15	0.0146	NA	finn-b-I9_VARICVE	Varicose veins
2	68421049	rs9677635	PPP3R1	A	G	G	0.1409	G	A	-0.1409	1.36395e-35	0.0113	459702	ebi-a-GCST90018939	Varicose veins
2	68421049	rs9677635	PPP3R1	A	G	G	0.00165279	G	A	-0.00165279	1.59993e-17	0.000193925	463010	ukb-b-1765	Operative procedures - secondary OPCS: L87.1 Stripping of long saphenous vein
2	68421049	rs9677635	PPP3R1	A	G	G	0.00198598	G	A	-0.00198598	1.59993e-17	0.000233117	463010	ukb-b-14422	Operative procedures - main OPCS: L85.1 Ligation of long saphenous vein
2	68421049	rs9677635	PPP3R1	A	G	G	0.00234066	G	A	-0.00234066	7.10068e-20	0.0002565	463010	ukb-b-4363	Operative procedures - secondary OPCS: L87.4 Avulsion of varicose vein of leg
2	68421049	rs9677635	PPP3R1	A	G	G	0.00299838	G	A	-0.00299838	2.10717e-16	0.000364934	337199	ukb-a-538	Diagnoses - main ICD10: I83 Varicose veins of lower extremities
2	68421049	rs9677635	PPP3R1	A	G	G	0.00351937	G	A	-0.00351937	2.80027e-28	0.000319115	463010	ukb-b-6720	Diagnoses - main ICD10: I83.9 Varicose veins of lower extremities without ulcer or inflammation
2	68421049	rs9677635	PPP3R1	A	G	G	0.00360029	G	A	-0.00360029	3.7627e-16	0.000441951	361194	ukb-d-I9_DISVEINLYMPH	Diseases of veins, lymphatic vessels and lymph nodes, not elsewhere classified
2	68421049	rs9677635	PPP3R1	A	G	G	0.00614118	G	A	-0.00614118	5.79963e-46	0.000431504	462933	ukb-b-15592	Operation code: varicose vein surgery
2	68421049	rs9677635	PPP3R1	A	G	G	-0.0078	G	A	0.0078	2.88702e-09	0.0013	360388	ebi-a-GCST90018959	Height
2	68421049	rs9677635	PPP3R1	A	G	G	-0.012556	G	A	0.012556	3.50002e-10	0.00209242	502773	ebi-a-GCST90029009	Waist-hip ratio
2	68421049	rs9677635	PPP3R1	A	G	G	-0.0093732	G	A	0.0093732	1.09999e-09	0.00162275	673878	ebi-a-GCST90029008	Height
2	68422771	rs4671878	PPP3R1	A	G	G	0.0815	G	A	-0.0815	1.07399e-11	0.012	NA	finn-b-FG_DISVEINLYMPH	Diseases of veins, lymphatic vessels and lymph nodes, not elsewhere classified (FINNGEN)
2	68422771	rs4671878	PPP3R1	A	G	G	0.0842	G	A	-0.0842	1.033e-13	0.0113	NA	finn-b-I9_DISVEINLYMPH	Diseases of veins, lymphatic vessels and lymph nodes, not elsewhere classified
2	68422771	rs4671878	PPP3R1	A	G	G	0.1112	G	A	-0.1112	1.739e-14	0.0145	NA	finn-b-I9_VARICVE_EXNONE	Varicose veins (no controls excluded)
2	68422771	rs4671878	PPP3R1	A	G	G	0.1155	G	A	-0.1155	3.004e-15	0.0146	NA	finn-b-I9_VARICVE	Varicose veins
2	68422771	rs4671878	PPP3R1	A	G	G	0.1409	G	A	-0.1409	1.31009e-35	0.0113	459702	ebi-a-GCST90018939	Varicose veins
2	68422771	rs4671878	PPP3R1	A	G	G	0.00165247	G	A	-0.00165247	1.59993e-17	0.000193926	463010	ukb-b-1765	Operative procedures - secondary OPCS: L87.1 Stripping of long saphenous vein
2	68422771	rs4671878	PPP3R1	A	G	G	0.00198633	G	A	-0.00198633	1.59993e-17	0.000233118	463010	ukb-b-14422	Operative procedures - main OPCS: L85.1 Ligation of long saphenous vein
2	68422771	rs4671878	PPP3R1	A	G	G	0.00234081	G	A	-0.00234081	7.10068e-20	0.000256501	463010	ukb-b-4363	Operative procedures - secondary OPCS: L87.4 Avulsion of varicose vein of leg
2	68422771	rs4671878	PPP3R1	A	G	G	0.00299785	G	A	-0.00299785	2.13403e-16	0.000364936	337199	ukb-a-538	Diagnoses - main ICD10: I83 Varicose veins of lower extremities
2	68422771	rs4671878	PPP3R1	A	G	G	0.00351983	G	A	-0.00351983	2.70023e-28	0.000319116	463010	ukb-b-6720	Diagnoses - main ICD10: I83.9 Varicose veins of lower extremities without ulcer or inflammation
2	68422771	rs4671878	PPP3R1	A	G	G	0.00360102	G	A	-0.00360102	3.71279e-16	0.000441953	361194	ukb-d-I9_DISVEINLYMPH	Diseases of veins, lymphatic vessels and lymph nodes, not elsewhere classified
2	68422771	rs4671878	PPP3R1	A	G	G	0.00614175	G	A	-0.00614175	5.70033e-46	0.000431505	462933	ukb-b-15592	Operation code: varicose vein surgery
2	68422771	rs4671878	PPP3R1	A	G	G	-0.0078	G	A	0.0078	2.90898e-09	0.0013	360388	ebi-a-GCST90018959	Height
2	68422771	rs4671878	PPP3R1	A	G	G	-0.0125622	G	A	0.0125622	3.40001e-10	0.00209243	502773	ebi-a-GCST90029009	Waist-hip ratio
2	68422771	rs4671878	PPP3R1	A	G	G	-0.00937624	G	A	0.00937624	1.09999e-09	0.00162276	673878	ebi-a-GCST90029008	Height
2	68423530	rs12713635	PPP3R1	A	G	G	0.141	G	A	-0.141	1.16708e-35	0.0113	459702	ebi-a-GCST90018939	Varicose veins
2	68423530	rs12713635	PPP3R1	A	G	G	0.0816	G	A	-0.0816	1.02306e-11	0.012	NA	finn-b-FG_DISVEINLYMPH	Diseases of veins, lymphatic vessels and lymph nodes, not elsewhere classified (FINNGEN)
2	68423530	rs12713635	PPP3R1	A	G	G	0.0842	G	A	-0.0842	1.01695e-13	0.0113	NA	finn-b-I9_DISVEINLYMPH	Diseases of veins, lymphatic vessels and lymph nodes, not elsewhere classified
2	68423530	rs12713635	PPP3R1	A	G	G	0.1113	G	A	-0.1113	1.67687e-14	0.0145	NA	finn-b-I9_VARICVE_EXNONE	Varicose veins (no controls excluded)
2	68423530	rs12713635	PPP3R1	A	G	G	0.1155	G	A	-0.1155	2.93022e-15	0.0146	NA	finn-b-I9_VARICVE	Varicose veins
2	68423530	rs12713635	PPP3R1	A	G	G	0.0019868	G	A	-0.0019868	1.59993e-17	0.000233122	463010	ukb-b-14422	Operative procedures - main OPCS: L85.1 Ligation of long saphenous vein
2	68423530	rs12713635	PPP3R1	A	G	G	0.0061427	G	A	-0.0061427	5.50047e-46	0.000431512	462933	ukb-b-15592	Operation code: varicose vein surgery
2	68423530	rs12713635	PPP3R1	A	G	G	0.00165244	G	A	-0.00165244	1.59993e-17	0.000193929	463010	ukb-b-1765	Operative procedures - secondary OPCS: L87.1 Stripping of long saphenous vein
2	68423530	rs12713635	PPP3R1	A	G	G	0.00234123	G	A	-0.00234123	7.00003e-20	0.000256506	463010	ukb-b-4363	Operative procedures - secondary OPCS: L87.4 Avulsion of varicose vein of leg
2	68423530	rs12713635	PPP3R1	A	G	G	0.00299814	G	A	-0.00299814	2.12324e-16	0.000364945	337199	ukb-a-538	Diagnoses - main ICD10: I83 Varicose veins of lower extremities
2	68423530	rs12713635	PPP3R1	A	G	G	0.00352009	G	A	-0.00352009	2.70023e-28	0.000319122	463010	ukb-b-6720	Diagnoses - main ICD10: I83.9 Varicose veins of lower extremities without ulcer or inflammation
2	68423530	rs12713635	PPP3R1	A	G	G	0.00359862	G	A	-0.00359862	3.88956e-16	0.000441964	361194	ukb-d-I9_DISVEINLYMPH	Diseases of veins, lymphatic vessels and lymph nodes, not elsewhere classified
2	68423530	rs12713635	PPP3R1	A	G	G	-0.0079	G	A	0.0079	2.88503e-09	0.0013	360388	ebi-a-GCST90018959	Height
2	68423530	rs12713635	PPP3R1	A	G	G	-0.0125494	G	A	0.0125494	3.50002e-10	0.00209247	502773	ebi-a-GCST90029009	Waist-hip ratio
2	68423530	rs12713635	PPP3R1	A	G	G	-0.00936805	G	A	0.00936805	1.09999e-09	0.00162279	673878	ebi-a-GCST90029008	Height
2	68430925	rs7574378	PPP3R1	T	C	C	0.182	C	T	-0.182	9.18692e-09	0.0317	737071	ieu-b-38	systolic blood pressure
2	68430925	rs7574378	PPP3R1	T	C	C	0.0816	C	T	-0.0816	1.01298e-11	0.012	NA	finn-b-FG_DISVEINLYMPH	Diseases of veins, lymphatic vessels and lymph nodes, not elsewhere classified (FINNGEN)
2	68430925	rs7574378	PPP3R1	T	C	C	0.0843	C	T	-0.0843	9.76338e-14	0.0113	NA	finn-b-I9_DISVEINLYMPH	Diseases of veins, lymphatic vessels and lymph nodes, not elsewhere classified
2	68430925	rs7574378	PPP3R1	T	C	C	0.1114	C	T	-0.1114	1.63682e-14	0.0145	NA	finn-b-I9_VARICVE_EXNONE	Varicose veins (no controls excluded)
2	68430925	rs7574378	PPP3R1	T	C	C	0.1156	C	T	-0.1156	2.82228e-15	0.0146	NA	finn-b-I9_VARICVE	Varicose veins
2	68430925	rs7574378	PPP3R1	T	C	C	0.1407	C	T	-0.1407	1.692e-35	0.0113	459702	ebi-a-GCST90018939	Varicose veins
2	68430925	rs7574378	PPP3R1	T	C	C	0.0035797	C	T	-0.0035797	5.51696e-16	0.000441943	361194	ukb-d-I9_DISVEINLYMPH	Diseases of veins, lymphatic vessels and lymph nodes, not elsewhere classified
2	68430925	rs7574378	PPP3R1	T	C	C	0.00164623	C	T	-0.00164623	2.09991e-17	0.000193923	463010	ukb-b-1765	Operative procedures - secondary OPCS: L87.1 Stripping of long saphenous vein
2	68430925	rs7574378	PPP3R1	T	C	C	0.00198001	C	T	-0.00198001	1.99986e-17	0.000233114	463010	ukb-b-14422	Operative procedures - main OPCS: L85.1 Ligation of long saphenous vein
2	68430925	rs7574378	PPP3R1	T	C	C	0.00233104	C	T	-0.00233104	1e-19	0.000256497	463010	ukb-b-4363	Operative procedures - secondary OPCS: L87.4 Avulsion of varicose vein of leg
2	68430925	rs7574378	PPP3R1	T	C	C	0.00298882	C	T	-0.00298882	2.61818e-16	0.000364929	337199	ukb-a-538	Diagnoses - main ICD10: I83 Varicose veins of lower extremities
2	68430925	rs7574378	PPP3R1	T	C	C	0.00350978	C	T	-0.00350978	3.90032e-28	0.000319111	463010	ukb-b-6720	Diagnoses - main ICD10: I83.9 Varicose veins of lower extremities without ulcer or inflammation
2	68430925	rs7574378	PPP3R1	T	C	C	0.00613567	C	T	-0.00613567	6.89922e-46	0.000431498	462933	ukb-b-15592	Operation code: varicose vein surgery
2	68430925	rs7574378	PPP3R1	T	C	C	-0.0079	C	T	0.0079	2.828e-09	0.0013	360388	ebi-a-GCST90018959	Height
2	68430925	rs7574378	PPP3R1	T	C	C	-0.0094373	C	T	0.0094373	8.19993e-10	0.00162273	673878	ebi-a-GCST90029008	Height
2	68430925	rs7574378	PPP3R1	T	C	C	-0.0126387	C	T	0.0126387	2.69998e-10	0.00209239	502773	ebi-a-GCST90029009	Waist-hip ratio
2	68431259	rs7577586	PPP3R1	A	G	G	0.0816	G	A	-0.0816	1.00809e-11	0.012	NA	finn-b-FG_DISVEINLYMPH	Diseases of veins, lymphatic vessels and lymph nodes, not elsewhere classified (FINNGEN)
2	68431259	rs7577586	PPP3R1	A	G	G	0.0843	G	A	-0.0843	9.72076e-14	0.0113	NA	finn-b-I9_DISVEINLYMPH	Diseases of veins, lymphatic vessels and lymph nodes, not elsewhere classified
2	68431259	rs7577586	PPP3R1	A	G	G	0.1114	G	A	-0.1114	1.62705e-14	0.0145	NA	finn-b-I9_VARICVE_EXNONE	Varicose veins (no controls excluded)
2	68431259	rs7577586	PPP3R1	A	G	G	0.1156	G	A	-0.1156	2.80221e-15	0.0146	NA	finn-b-I9_VARICVE	Varicose veins
2	68431259	rs7577586	PPP3R1	A	G	G	0.1407	G	A	-0.1407	1.69005e-35	0.0113	459702	ebi-a-GCST90018939	Varicose veins
2	68431259	rs7577586	PPP3R1	A	G	G	0.1822	G	A	-0.1822	8.87789e-09	0.0317	737079	ieu-b-38	systolic blood pressure
2	68431259	rs7577586	PPP3R1	A	G	G	0.00164621	G	A	-0.00164621	2.09991e-17	0.000193921	463010	ukb-b-1765	Operative procedures - secondary OPCS: L87.1 Stripping of long saphenous vein
2	68431259	rs7577586	PPP3R1	A	G	G	0.00198014	G	A	-0.00198014	1.99986e-17	0.000233112	463010	ukb-b-14422	Operative procedures - main OPCS: L85.1 Ligation of long saphenous vein
2	68431259	rs7577586	PPP3R1	A	G	G	0.00233115	G	A	-0.00233115	1e-19	0.000256496	463010	ukb-b-4363	Operative procedures - secondary OPCS: L87.4 Avulsion of varicose vein of leg
2	68431259	rs7577586	PPP3R1	A	G	G	0.00298876	G	A	-0.00298876	2.6212e-16	0.000364928	337199	ukb-a-538	Diagnoses - main ICD10: I83 Varicose veins of lower extremities
2	68431259	rs7577586	PPP3R1	A	G	G	0.00350986	G	A	-0.00350986	3.90032e-28	0.000319109	463010	ukb-b-6720	Diagnoses - main ICD10: I83.9 Varicose veins of lower extremities without ulcer or inflammation
2	68431259	rs7577586	PPP3R1	A	G	G	0.00357971	G	A	-0.00357971	5.51442e-16	0.000441942	361194	ukb-d-I9_DISVEINLYMPH	Diseases of veins, lymphatic vessels and lymph nodes, not elsewhere classified
2	68431259	rs7577586	PPP3R1	A	G	G	0.00613576	G	A	-0.00613576	6.89922e-46	0.000431495	462933	ukb-b-15592	Operation code: varicose vein surgery
2	68431259	rs7577586	PPP3R1	A	G	G	-0.0079	G	A	0.0079	2.83498e-09	0.0013	360388	ebi-a-GCST90018959	Height
2	68431259	rs7577586	PPP3R1	A	G	G	-0.0126411	G	A	0.0126411	2.69998e-10	0.00209238	502773	ebi-a-GCST90029009	Waist-hip ratio
2	68431259	rs7577586	PPP3R1	A	G	G	-0.00943724	G	A	0.00943724	8.30004e-10	0.00162272	673878	ebi-a-GCST90029008	Height
2	68433831	rs6736178	PPP3R1	A	G	G	0.141	G	A	-0.141	1.21703e-35	0.0113	459702	ebi-a-GCST90018939	Varicose veins
2	68433831	rs6736178	PPP3R1	A	G	G	0.0817	G	A	-0.0817	9.84918e-12	0.012	NA	finn-b-FG_DISVEINLYMPH	Diseases of veins, lymphatic vessels and lymph nodes, not elsewhere classified (FINNGEN)
2	68433831	rs6736178	PPP3R1	A	G	G	0.0843	G	A	-0.0843	9.45148e-14	0.0113	NA	finn-b-I9_DISVEINLYMPH	Diseases of veins, lymphatic vessels and lymph nodes, not elsewhere classified
2	68433831	rs6736178	PPP3R1	A	G	G	0.1112	G	A	-0.1112	1.72982e-14	0.0145	NA	finn-b-I9_VARICVE_EXNONE	Varicose veins (no controls excluded)
2	68433831	rs6736178	PPP3R1	A	G	G	0.1155	G	A	-0.1155	2.96688e-15	0.0146	NA	finn-b-I9_VARICVE	Varicose veins
2	68433831	rs6736178	PPP3R1	A	G	G	0.0061419	G	A	-0.0061419	5.60015e-46	0.000431463	462933	ukb-b-15592	Operation code: varicose vein surgery
2	68433831	rs6736178	PPP3R1	A	G	G	0.00164688	G	A	-0.00164688	1.99986e-17	0.000193907	463010	ukb-b-1765	Operative procedures - secondary OPCS: L87.1 Stripping of long saphenous vein
2	68433831	rs6736178	PPP3R1	A	G	G	0.00198251	G	A	-0.00198251	1.80011e-17	0.000233095	463010	ukb-b-14422	Operative procedures - main OPCS: L85.1 Ligation of long saphenous vein
2	68433831	rs6736178	PPP3R1	A	G	G	0.00233351	G	A	-0.00233351	9.20026e-20	0.000256476	463010	ukb-b-4363	Operative procedures - secondary OPCS: L87.4 Avulsion of varicose vein of leg
2	68433831	rs6736178	PPP3R1	A	G	G	0.00299095	G	A	-0.00299095	2.48028e-16	0.000364899	337199	ukb-a-538	Diagnoses - main ICD10: I83 Varicose veins of lower extremities
2	68433831	rs6736178	PPP3R1	A	G	G	0.00351368	G	A	-0.00351368	3.40017e-28	0.000319085	463010	ukb-b-6720	Diagnoses - main ICD10: I83.9 Varicose veins of lower extremities without ulcer or inflammation
2	68433831	rs6736178	PPP3R1	A	G	G	0.00359213	G	A	-0.00359213	4.35111e-16	0.000441905	361194	ukb-d-I9_DISVEINLYMPH	Diseases of veins, lymphatic vessels and lymph nodes, not elsewhere classified
2	68433831	rs6736178	PPP3R1	A	G	G	-0.0078	G	A	0.0078	3.58402e-09	0.0013	360388	ebi-a-GCST90018959	Height
2	68433831	rs6736178	PPP3R1	A	G	G	-0.012598	G	A	0.012598	3.09999e-10	0.00209222	502773	ebi-a-GCST90029009	Waist-hip ratio
2	68433831	rs6736178	PPP3R1	A	G	G	-0.00940672	G	A	0.00940672	9.20005e-10	0.0016226	673878	ebi-a-GCST90029008	Height
2	68435431	rs12713636	PPP3R1	G	C	C	0.141	C	G	-0.141	1.25112e-35	0.0113	459702	ebi-a-GCST90018939	Varicose veins
2	68435431	rs12713636	PPP3R1	G	C	C	0.0817	C	G	-0.0817	9.87416e-12	0.012	NA	finn-b-FG_DISVEINLYMPH	Diseases of veins, lymphatic vessels and lymph nodes, not elsewhere classified (FINNGEN)
2	68435431	rs12713636	PPP3R1	G	C	C	0.0843	C	G	-0.0843	9.51919e-14	0.0113	NA	finn-b-I9_DISVEINLYMPH	Diseases of veins, lymphatic vessels and lymph nodes, not elsewhere classified
2	68435431	rs12713636	PPP3R1	G	C	C	0.1114	C	G	-0.1114	1.60103e-14	0.0145	NA	finn-b-I9_VARICVE_EXNONE	Varicose veins (no controls excluded)
2	68435431	rs12713636	PPP3R1	G	C	C	0.1157	C	G	-0.1157	2.75296e-15	0.0146	NA	finn-b-I9_VARICVE	Varicose veins
2	68435431	rs12713636	PPP3R1	G	C	C	0.0061419	C	G	-0.0061419	5.50047e-46	0.000431455	462933	ukb-b-15592	Operation code: varicose vein surgery
2	68435431	rs12713636	PPP3R1	G	C	C	0.00164658	C	G	-0.00164658	1.99986e-17	0.000193903	463010	ukb-b-1765	Operative procedures - secondary OPCS: L87.1 Stripping of long saphenous vein
2	68435431	rs12713636	PPP3R1	G	C	C	0.00198274	C	G	-0.00198274	1.80011e-17	0.000233091	463010	ukb-b-14422	Operative procedures - main OPCS: L85.1 Ligation of long saphenous vein
2	68435431	rs12713636	PPP3R1	G	C	C	0.00233358	C	G	-0.00233358	9.09913e-20	0.000256472	463010	ukb-b-4363	Operative procedures - secondary OPCS: L87.4 Avulsion of varicose vein of leg
2	68435431	rs12713636	PPP3R1	G	C	C	0.00299056	C	G	-0.00299056	2.49919e-16	0.000364892	337199	ukb-a-538	Diagnoses - main ICD10: I83 Varicose veins of lower extremities
2	68435431	rs12713636	PPP3R1	G	C	C	0.00351353	C	G	-0.00351353	3.40017e-28	0.00031908	463010	ukb-b-6720	Diagnoses - main ICD10: I83.9 Varicose veins of lower extremities without ulcer or inflammation
2	68435431	rs12713636	PPP3R1	G	C	C	0.00359208	C	G	-0.00359208	4.35011e-16	0.000441897	361194	ukb-d-I9_DISVEINLYMPH	Diseases of veins, lymphatic vessels and lymph nodes, not elsewhere classified
2	68435431	rs12713636	PPP3R1	G	C	C	-0.0078	C	G	0.0078	3.33204e-09	0.0013	360388	ebi-a-GCST90018959	Height
2	68435431	rs12713636	PPP3R1	G	C	C	-0.0126001	C	G	0.0126001	3.09999e-10	0.00209218	502773	ebi-a-GCST90029009	Waist-hip ratio
2	68435431	rs12713636	PPP3R1	G	C	C	-0.00941096	C	G	0.00941096	9.09997e-10	0.00162257	673878	ebi-a-GCST90029008	Height
2	68438614	rs2861814	PPP3R1	T	C	C	0.0817	C	T	-0.0817	9.84464e-12	0.012	NA	finn-b-FG_DISVEINLYMPH	Diseases of veins, lymphatic vessels and lymph nodes, not elsewhere classified (FINNGEN)
2	68438614	rs2861814	PPP3R1	T	C	C	0.0843	C	T	-0.0843	9.517e-14	0.0113	NA	finn-b-I9_DISVEINLYMPH	Diseases of veins, lymphatic vessels and lymph nodes, not elsewhere classified
2	68438614	rs2861814	PPP3R1	T	C	C	0.1114	C	T	-0.1114	1.60398e-14	0.0145	NA	finn-b-I9_VARICVE_EXNONE	Varicose veins (no controls excluded)
2	68438614	rs2861814	PPP3R1	T	C	C	0.1157	C	T	-0.1157	2.75994e-15	0.0146	NA	finn-b-I9_VARICVE	Varicose veins
2	68438614	rs2861814	PPP3R1	T	C	C	0.1408	C	T	-0.1408	1.45412e-35	0.0113	459702	ebi-a-GCST90018939	Varicose veins
2	68438614	rs2861814	PPP3R1	T	C	C	0.1821	C	T	-0.1821	8.95592e-09	0.0317	736795	ieu-b-38	systolic blood pressure
2	68438614	rs2861814	PPP3R1	T	C	C	0.0023309	C	T	-0.0023309	1e-19	0.000256493	463010	ukb-b-4363	Operative procedures - secondary OPCS: L87.4 Avulsion of varicose vein of leg
2	68438614	rs2861814	PPP3R1	T	C	C	0.0061354	C	T	-0.0061354	7.00003e-46	0.000431491	462933	ukb-b-15592	Operation code: varicose vein surgery
2	68438614	rs2861814	PPP3R1	T	C	C	0.00164525	C	T	-0.00164525	2.19989e-17	0.000193919	463010	ukb-b-1765	Operative procedures - secondary OPCS: L87.1 Stripping of long saphenous vein
2	68438614	rs2861814	PPP3R1	T	C	C	0.00198044	C	T	-0.00198044	1.99986e-17	0.00023311	463010	ukb-b-14422	Operative procedures - main OPCS: L85.1 Ligation of long saphenous vein
2	68438614	rs2861814	PPP3R1	T	C	C	0.00298653	C	T	-0.00298653	2.7555e-16	0.000364924	337199	ukb-a-538	Diagnoses - main ICD10: I83 Varicose veins of lower extremities
2	68438614	rs2861814	PPP3R1	T	C	C	0.00350868	C	T	-0.00350868	4.00037e-28	0.000319106	463010	ukb-b-6720	Diagnoses - main ICD10: I83.9 Varicose veins of lower extremities without ulcer or inflammation
2	68438614	rs2861814	PPP3R1	T	C	C	0.00358632	C	T	-0.00358632	4.87192e-16	0.000441936	361194	ukb-d-I9_DISVEINLYMPH	Diseases of veins, lymphatic vessels and lymph nodes, not elsewhere classified
2	68438614	rs2861814	PPP3R1	T	C	C	-0.0079	C	T	0.0079	2.837e-09	0.0013	360388	ebi-a-GCST90018959	Height
2	68438614	rs2861814	PPP3R1	T	C	C	-0.0126743	C	T	0.0126743	2.5e-10	0.00209235	502773	ebi-a-GCST90029009	Waist-hip ratio
2	68438614	rs2861814	PPP3R1	T	C	C	-0.00942739	C	T	0.00942739	8.60003e-10	0.0016227	673878	ebi-a-GCST90029008	Height
2	68439960	rs6738957	PPP3R1	T	C	C	0.0817	C	T	-0.0817	9.96323e-12	0.012	NA	finn-b-FG_DISVEINLYMPH	Diseases of veins, lymphatic vessels and lymph nodes, not elsewhere classified (FINNGEN)
2	68439960	rs6738957	PPP3R1	T	C	C	0.0843	C	T	-0.0843	9.63607e-14	0.0113	NA	finn-b-I9_DISVEINLYMPH	Diseases of veins, lymphatic vessels and lymph nodes, not elsewhere classified
2	68439960	rs6738957	PPP3R1	T	C	C	0.1114	C	T	-0.1114	1.60694e-14	0.0145	NA	finn-b-I9_VARICVE_EXNONE	Varicose veins (no controls excluded)
2	68439960	rs6738957	PPP3R1	T	C	C	0.1156	C	T	-0.1156	2.76885e-15	0.0146	NA	finn-b-I9_VARICVE	Varicose veins
2	68439960	rs6738957	PPP3R1	T	C	C	0.1409	C	T	-0.1409	1.33199e-35	0.0113	459702	ebi-a-GCST90018939	Varicose veins
2	68439960	rs6738957	PPP3R1	T	C	C	0.1831	C	T	-0.1831	7.72894e-09	0.0317	736227	ieu-b-38	systolic blood pressure
2	68439960	rs6738957	PPP3R1	T	C	C	0.0029866	C	T	-0.0029866	2.76249e-16	0.000364946	337199	ukb-a-538	Diagnoses - main ICD10: I83 Varicose veins of lower extremities
2	68439960	rs6738957	PPP3R1	T	C	C	0.0035826	C	T	-0.0035826	5.24204e-16	0.000441962	361194	ukb-d-I9_DISVEINLYMPH	Diseases of veins, lymphatic vessels and lymph nodes, not elsewhere classified
2	68439960	rs6738957	PPP3R1	T	C	C	0.00164514	C	T	-0.00164514	2.19989e-17	0.000193929	463010	ukb-b-1765	Operative procedures - secondary OPCS: L87.1 Stripping of long saphenous vein
2	68439960	rs6738957	PPP3R1	T	C	C	0.00198006	C	T	-0.00198006	1.99986e-17	0.000233122	463010	ukb-b-14422	Operative procedures - main OPCS: L85.1 Ligation of long saphenous vein
2	68439960	rs6738957	PPP3R1	T	C	C	0.00233099	C	T	-0.00233099	1e-19	0.000256506	463010	ukb-b-4363	Operative procedures - secondary OPCS: L87.4 Avulsion of varicose vein of leg
2	68439960	rs6738957	PPP3R1	T	C	C	0.00350854	C	T	-0.00350854	4.10015e-28	0.000319122	463010	ukb-b-6720	Diagnoses - main ICD10: I83.9 Varicose veins of lower extremities without ulcer or inflammation
2	68439960	rs6738957	PPP3R1	T	C	C	0.00613627	C	T	-0.00613627	6.79986e-46	0.000431513	462933	ukb-b-15592	Operation code: varicose vein surgery
2	68439960	rs6738957	PPP3R1	T	C	C	-0.0079	C	T	0.0079	2.70203e-09	0.0013	360388	ebi-a-GCST90018959	Height
2	68439960	rs6738957	PPP3R1	T	C	C	-0.0126378	C	T	0.0126378	2.69998e-10	0.00209246	502773	ebi-a-GCST90029009	Waist-hip ratio
2	68439960	rs6738957	PPP3R1	T	C	C	-0.00943975	C	T	0.00943975	8.50002e-10	0.00162278	673878	ebi-a-GCST90029008	Height
2	68443651	rs10191980	PPP3R1	G	A	A	0.141	A	G	-0.141	1.27409e-35	0.0113	459702	ebi-a-GCST90018939	Varicose veins
2	68443651	rs10191980	PPP3R1	G	A	A	0.0814	A	G	-0.0814	1.17193e-11	0.012	NA	finn-b-FG_DISVEINLYMPH	Diseases of veins, lymphatic vessels and lymph nodes, not elsewhere classified (FINNGEN)
2	68443651	rs10191980	PPP3R1	G	A	A	0.0841	A	G	-0.0841	1.10002e-13	0.0113	NA	finn-b-I9_DISVEINLYMPH	Diseases of veins, lymphatic vessels and lymph nodes, not elsewhere classified
2	68443651	rs10191980	PPP3R1	G	A	A	0.1115	A	G	-0.1115	1.59882e-14	0.0145	NA	finn-b-I9_VARICVE_EXNONE	Varicose veins (no controls excluded)
2	68443651	rs10191980	PPP3R1	G	A	A	0.1157	A	G	-0.1157	2.77396e-15	0.0146	NA	finn-b-I9_VARICVE	Varicose veins
2	68443651	rs10191980	PPP3R1	G	A	A	0.00164611	A	G	-0.00164611	2.09991e-17	0.000193947	463010	ukb-b-1765	Operative procedures - secondary OPCS: L87.1 Stripping of long saphenous vein
2	68443651	rs10191980	PPP3R1	G	A	A	0.00197847	A	G	-0.00197847	2.09991e-17	0.000233144	463010	ukb-b-14422	Operative procedures - main OPCS: L85.1 Ligation of long saphenous vein
2	68443651	rs10191980	PPP3R1	G	A	A	0.00232885	A	G	-0.00232885	1.10002e-19	0.00025653	463010	ukb-b-4363	Operative procedures - secondary OPCS: L87.4 Avulsion of varicose vein of leg
2	68443651	rs10191980	PPP3R1	G	A	A	0.00298202	A	G	-0.00298202	3.09101e-16	0.000364991	337199	ukb-a-538	Diagnoses - main ICD10: I83 Varicose veins of lower extremities
2	68443651	rs10191980	PPP3R1	G	A	A	0.00350281	A	G	-0.00350281	5.00035e-28	0.000319152	463010	ukb-b-6720	Diagnoses - main ICD10: I83.9 Varicose veins of lower extremities without ulcer or inflammation
2	68443651	rs10191980	PPP3R1	G	A	A	0.00357881	A	G	-0.00357881	5.66761e-16	0.000442012	361194	ukb-d-I9_DISVEINLYMPH	Diseases of veins, lymphatic vessels and lymph nodes, not elsewhere classified
2	68443651	rs10191980	PPP3R1	G	A	A	0.00611972	A	G	-0.00611972	1.20005e-45	0.000431554	462933	ukb-b-15592	Operation code: varicose vein surgery
2	68443651	rs10191980	PPP3R1	G	A	A	-0.0079	A	G	0.0079	2.89401e-09	0.0013	360388	ebi-a-GCST90018959	Height
2	68443651	rs10191980	PPP3R1	G	A	A	-0.0126382	A	G	0.0126382	2.69998e-10	0.00209266	502773	ebi-a-GCST90029009	Waist-hip ratio
2	68443651	rs10191980	PPP3R1	G	A	A	-0.00943197	A	G	0.00943197	8.79995e-10	0.00162293	673878	ebi-a-GCST90029008	Height
2	68443835	rs10192179	PPP3R1	T	A	A	0.141	A	T	-0.141	1.31099e-35	0.0113	459702	ebi-a-GCST90018939	Varicose veins
2	68443835	rs10192179	PPP3R1	T	A	A	0.0815	A	T	-0.0815	1.09194e-11	0.012	NA	finn-b-FG_DISVEINLYMPH	Diseases of veins, lymphatic vessels and lymph nodes, not elsewhere classified (FINNGEN)
2	68443835	rs10192179	PPP3R1	T	A	A	0.0841	A	T	-0.0841	1.10002e-13	0.0113	NA	finn-b-I9_DISVEINLYMPH	Diseases of veins, lymphatic vessels and lymph nodes, not elsewhere classified
2	68443835	rs10192179	PPP3R1	T	A	A	0.1114	A	T	-0.1114	1.64816e-14	0.0145	NA	finn-b-I9_VARICVE_EXNONE	Varicose veins (no controls excluded)
2	68443835	rs10192179	PPP3R1	T	A	A	0.1156	A	T	-0.1156	2.8688e-15	0.0146	NA	finn-b-I9_VARICVE	Varicose veins
2	68443835	rs10192179	PPP3R1	T	A	A	0.00164618	A	T	-0.00164618	2.09991e-17	0.000193949	463010	ukb-b-1765	Operative procedures - secondary OPCS: L87.1 Stripping of long saphenous vein
2	68443835	rs10192179	PPP3R1	T	A	A	0.00197849	A	T	-0.00197849	2.09991e-17	0.000233145	463010	ukb-b-14422	Operative procedures - main OPCS: L85.1 Ligation of long saphenous vein
2	68443835	rs10192179	PPP3R1	T	A	A	0.00232892	A	T	-0.00232892	1.10002e-19	0.000256532	463010	ukb-b-4363	Operative procedures - secondary OPCS: L87.4 Avulsion of varicose vein of leg
2	68443835	rs10192179	PPP3R1	T	A	A	0.00298212	A	T	-0.00298212	3.08461e-16	0.000364992	337199	ukb-a-538	Diagnoses - main ICD10: I83 Varicose veins of lower extremities
2	68443835	rs10192179	PPP3R1	T	A	A	0.00350296	A	T	-0.00350296	5.00035e-28	0.000319154	463010	ukb-b-6720	Diagnoses - main ICD10: I83.9 Varicose veins of lower extremities without ulcer or inflammation
2	68443835	rs10192179	PPP3R1	T	A	A	0.00357919	A	T	-0.00357919	5.62989e-16	0.000442014	361194	ukb-d-I9_DISVEINLYMPH	Diseases of veins, lymphatic vessels and lymph nodes, not elsewhere classified
2	68443835	rs10192179	PPP3R1	T	A	A	0.00611969	A	T	-0.00611969	1.20005e-45	0.000431556	462933	ukb-b-15592	Operation code: varicose vein surgery
2	68443835	rs10192179	PPP3R1	T	A	A	-0.0079	A	T	0.0079	2.62198e-09	0.0013	360388	ebi-a-GCST90018959	Height
2	68443835	rs10192179	PPP3R1	T	A	A	-0.0126293	A	T	0.0126293	2.80001e-10	0.00209267	502773	ebi-a-GCST90029009	Waist-hip ratio
2	68443835	rs10192179	PPP3R1	T	A	A	-0.00943161	A	T	0.00943161	8.9e-10	0.00162294	673878	ebi-a-GCST90029008	Height
2	68446936	rs10208241	PPP3R1	T	C	C	0.08	C	T	-0.08	2.23924e-11	0.012	NA	finn-b-FG_DISVEINLYMPH	Diseases of veins, lymphatic vessels and lymph nodes, not elsewhere classified (FINNGEN)
2	68446936	rs10208241	PPP3R1	T	C	C	0.0834	C	T	-0.0834	1.508e-13	0.0113	NA	finn-b-I9_DISVEINLYMPH	Diseases of veins, lymphatic vessels and lymph nodes, not elsewhere classified
2	68446936	rs10208241	PPP3R1	T	C	C	0.1088	C	T	-0.1088	5.33581e-14	0.0145	NA	finn-b-I9_VARICVE_EXNONE	Varicose veins (no controls excluded)
2	68446936	rs10208241	PPP3R1	T	C	C	0.1131	C	T	-0.1131	9.42975e-15	0.0146	NA	finn-b-I9_VARICVE	Varicose veins
2	68446936	rs10208241	PPP3R1	T	C	C	0.1409	C	T	-0.1409	8.34834e-36	0.0113	459702	ebi-a-GCST90018939	Varicose veins
2	68446936	rs10208241	PPP3R1	T	C	C	0.1848	C	T	-0.1848	5.58895e-09	0.0317	733621	ieu-b-38	systolic blood pressure
2	68446936	rs10208241	PPP3R1	T	C	C	0.011083	C	T	-0.011083	7.59994e-09	0.00182996	694866	ebi-a-GCST90028996	Mean platelet volume
2	68446936	rs10208241	PPP3R1	T	C	C	0.0115702	C	T	-0.0115702	8.78274e-09	0.00201125	396616	ebi-a-GCST90013981	Mean platelet thrombocyte volume (UKB data field 30100)
2	68446936	rs10208241	PPP3R1	T	C	C	0.00162915	C	T	-0.00162915	4.00037e-17	0.000193645	463010	ukb-b-1765	Operative procedures - secondary OPCS: L87.1 Stripping of long saphenous vein
2	68446936	rs10208241	PPP3R1	T	C	C	0.00197028	C	T	-0.00197028	2.60016e-17	0.000232781	463010	ukb-b-14422	Operative procedures - main OPCS: L85.1 Ligation of long saphenous vein
2	68446936	rs10208241	PPP3R1	T	C	C	0.00231948	C	T	-0.00231948	1.39991e-19	0.00025613	463010	ukb-b-4363	Operative procedures - secondary OPCS: L87.4 Avulsion of varicose vein of leg
2	68446936	rs10208241	PPP3R1	T	C	C	0.00300489	C	T	-0.00300489	1.63946e-16	0.000364393	337199	ukb-a-538	Diagnoses - main ICD10: I83 Varicose veins of lower extremities
2	68446936	rs10208241	PPP3R1	T	C	C	0.00350268	C	T	-0.00350268	4.19952e-28	0.000318655	463010	ukb-b-6720	Diagnoses - main ICD10: I83.9 Varicose veins of lower extremities without ulcer or inflammation
2	68446936	rs10208241	PPP3R1	T	C	C	0.00360802	C	T	-0.00360802	2.94442e-16	0.000441295	361194	ukb-d-I9_DISVEINLYMPH	Diseases of veins, lymphatic vessels and lymph nodes, not elsewhere classified
2	68446936	rs10208241	PPP3R1	T	C	C	0.00614114	C	T	-0.00614114	4.30031e-46	0.000430881	462933	ukb-b-15592	Operation code: varicose vein surgery
2	68446936	rs10208241	PPP3R1	T	C	C	-0.0078	C	T	0.0078	4.15901e-09	0.0013	360388	ebi-a-GCST90018959	Height
2	68446936	rs10208241	PPP3R1	T	C	C	-0.0128393	C	T	0.0128393	1.40001e-10	0.0020894	502773	ebi-a-GCST90029009	Waist-hip ratio
2	68446936	rs10208241	PPP3R1	T	C	C	-0.00916664	C	T	0.00916664	2.69998e-09	0.00162041	673878	ebi-a-GCST90029008	Height
2	68457573	rs12468533	PPP3R1	T	C	C	0.08	C	T	-0.08	2.23512e-11	0.012	NA	finn-b-FG_DISVEINLYMPH	Diseases of veins, lymphatic vessels and lymph nodes, not elsewhere classified (FINNGEN)
2	68457573	rs12468533	PPP3R1	T	C	C	0.0834	C	T	-0.0834	1.50591e-13	0.0113	NA	finn-b-I9_DISVEINLYMPH	Diseases of veins, lymphatic vessels and lymph nodes, not elsewhere classified
2	68457573	rs12468533	PPP3R1	T	C	C	0.1088	C	T	-0.1088	5.32353e-14	0.0145	NA	finn-b-I9_VARICVE_EXNONE	Varicose veins (no controls excluded)
2	68457573	rs12468533	PPP3R1	T	C	C	0.1131	C	T	-0.1131	9.40589e-15	0.0146	NA	finn-b-I9_VARICVE	Varicose veins
2	68457573	rs12468533	PPP3R1	T	C	C	0.1407	C	T	-0.1407	1.1749e-35	0.0113	459702	ebi-a-GCST90018939	Varicose veins
2	68457573	rs12468533	PPP3R1	T	C	C	0.1855	C	T	-0.1855	5.29505e-09	0.0318	731518	ieu-b-38	systolic blood pressure
2	68457573	rs12468533	PPP3R1	T	C	C	0.0016124	C	T	-0.0016124	8.99912e-17	0.00019386	463010	ukb-b-1765	Operative procedures - secondary OPCS: L87.1 Stripping of long saphenous vein
2	68457573	rs12468533	PPP3R1	T	C	C	0.0115791	C	T	-0.0115791	2.59998e-09	0.00182969	445364	ebi-a-GCST90025960	Mean platelet volume
2	68457573	rs12468533	PPP3R1	T	C	C	0.0120346	C	T	-0.0120346	8.30004e-09	0.00214759	422713	ebi-a-GCST90025968	Systolic blood pressure
2	68457573	rs12468533	PPP3R1	T	C	C	0.00195179	C	T	-0.00195179	5.50047e-17	0.000233038	463010	ukb-b-14422	Operative procedures - main OPCS: L85.1 Ligation of long saphenous vein
2	68457573	rs12468533	PPP3R1	T	C	C	0.00229274	C	T	-0.00229274	3.80014e-19	0.000256414	463010	ukb-b-4363	Operative procedures - secondary OPCS: L87.4 Avulsion of varicose vein of leg
2	68457573	rs12468533	PPP3R1	T	C	C	0.00299237	C	T	-0.00299237	2.36157e-16	0.000364809	337199	ukb-a-538	Diagnoses - main ICD10: I83 Varicose veins of lower extremities
2	68457573	rs12468533	PPP3R1	T	C	C	0.00347283	C	T	-0.00347283	1.29987e-27	0.000319008	463010	ukb-b-6720	Diagnoses - main ICD10: I83.9 Varicose veins of lower extremities without ulcer or inflammation
2	68457573	rs12468533	PPP3R1	T	C	C	0.00360311	C	T	-0.00360311	3.48418e-16	0.000441794	361194	ukb-d-I9_DISVEINLYMPH	Diseases of veins, lymphatic vessels and lymph nodes, not elsewhere classified
2	68457573	rs12468533	PPP3R1	T	C	C	0.00615454	C	T	-0.00615454	3.50026e-46	0.000431358	462933	ukb-b-15592	Operation code: varicose vein surgery
2	68457573	rs12468533	PPP3R1	T	C	C	-0.0077	C	T	0.0077	8.24005e-09	0.0013	360388	ebi-a-GCST90018959	Height
2	68457573	rs12468533	PPP3R1	T	C	C	-0.0129287	C	T	0.0129287	1.2e-10	0.00209179	458349	ebi-a-GCST90025996	Waist-to-hip ratio adjusted for BMI
2	68457573	rs12468533	PPP3R1	T	C	C	-0.0129411	C	T	0.0129411	1.09999e-10	0.00209177	502773	ebi-a-GCST90029009	Waist-hip ratio
2	68457573	rs12468533	PPP3R1	T	C	C	-0.00901178	C	T	0.00901178	4.09996e-09	0.00162225	673878	ebi-a-GCST90029008	Height
2	68457573	rs12468533	PPP3R1	T	C	C	-0.00930404	C	T	0.00930404	1.89998e-09	0.00162262	458235	ebi-a-GCST90025949	Height
2	68457854	rs12476697	PPP3R1	G	A	A	0.0797	A	G	-0.0797	2.68596e-11	0.012	NA	finn-b-FG_DISVEINLYMPH	Diseases of veins, lymphatic vessels and lymph nodes, not elsewhere classified (FINNGEN)
2	68457854	rs12476697	PPP3R1	G	A	A	0.0831	A	G	-0.0831	1.90897e-13	0.0113	NA	finn-b-I9_DISVEINLYMPH	Diseases of veins, lymphatic vessels and lymph nodes, not elsewhere classified
2	68457854	rs12476697	PPP3R1	G	A	A	0.1086	A	G	-0.1086	5.97448e-14	0.0145	NA	finn-b-I9_VARICVE_EXNONE	Varicose veins (no controls excluded)
2	68457854	rs12476697	PPP3R1	G	A	A	0.1128	A	G	-0.1128	1.10205e-14	0.0146	NA	finn-b-I9_VARICVE	Varicose veins
2	68457854	rs12476697	PPP3R1	G	A	A	0.1399	A	G	-0.1399	3.02482e-35	0.0113	459702	ebi-a-GCST90018939	Varicose veins
2	68457854	rs12476697	PPP3R1	G	A	A	0.1846	A	G	-0.1846	6.39102e-09	0.0318	731244	ieu-b-38	systolic blood pressure
2	68457854	rs12476697	PPP3R1	G	A	A	0.0061497	A	G	-0.0061497	4.40048e-46	0.000431506	462933	ukb-b-15592	Operation code: varicose vein surgery
2	68457854	rs12476697	PPP3R1	G	A	A	0.00160245	A	G	-0.00160245	1.39991e-16	0.000193926	463010	ukb-b-1765	Operative procedures - secondary OPCS: L87.1 Stripping of long saphenous vein
2	68457854	rs12476697	PPP3R1	G	A	A	0.00192888	A	G	-0.00192888	1.29987e-16	0.000233118	463010	ukb-b-14422	Operative procedures - main OPCS: L85.1 Ligation of long saphenous vein
2	68457854	rs12476697	PPP3R1	G	A	A	0.00227004	A	G	-0.00227004	8.80035e-19	0.000256502	463010	ukb-b-4363	Operative procedures - secondary OPCS: L87.4 Avulsion of varicose vein of leg
2	68457854	rs12476697	PPP3R1	G	A	A	0.00297982	A	G	-0.00297982	3.21144e-16	0.000364928	337199	ukb-a-538	Diagnoses - main ICD10: I83 Varicose veins of lower extremities
2	68457854	rs12476697	PPP3R1	G	A	A	0.00345271	A	G	-0.00345271	2.80027e-27	0.000319117	463010	ukb-b-6720	Diagnoses - main ICD10: I83.9 Varicose veins of lower extremities without ulcer or inflammation
2	68457854	rs12476697	PPP3R1	G	A	A	0.00357264	A	G	-0.00357264	6.28637e-16	0.00044194	361194	ukb-d-I9_DISVEINLYMPH	Diseases of veins, lymphatic vessels and lymph nodes, not elsewhere classified
2	68457854	rs12476697	PPP3R1	G	A	A	-0.0076	A	G	0.0076	9.21892e-09	0.0013	360388	ebi-a-GCST90018959	Height
2	68457854	rs12476697	PPP3R1	G	A	A	-0.0130718	A	G	0.0130718	7.19946e-11	0.00209251	502773	ebi-a-GCST90029009	Waist-hip ratio
2	68457854	rs12476697	PPP3R1	G	A	A	-0.00903344	A	G	0.00903344	3.69999e-09	0.00162282	673878	ebi-a-GCST90029008	Height
2	68463612	rs1375371	PPP3R1	A	G	G	0.08	G	A	-0.08	2.23203e-11	0.012	NA	finn-b-FG_DISVEINLYMPH	Diseases of veins, lymphatic vessels and lymph nodes, not elsewhere classified (FINNGEN)
2	68463612	rs1375371	PPP3R1	A	G	G	0.185	G	A	-0.185	6.28001e-09	0.0318	729179	ieu-b-38	systolic blood pressure
2	68463612	rs1375371	PPP3R1	A	G	G	0.0834	G	A	-0.0834	1.50314e-13	0.0113	NA	finn-b-I9_DISVEINLYMPH	Diseases of veins, lymphatic vessels and lymph nodes, not elsewhere classified
2	68463612	rs1375371	PPP3R1	A	G	G	0.1088	G	A	-0.1088	5.31618e-14	0.0145	NA	finn-b-I9_VARICVE_EXNONE	Varicose veins (no controls excluded)
2	68463612	rs1375371	PPP3R1	A	G	G	0.1131	G	A	-0.1131	9.39291e-15	0.0146	NA	finn-b-I9_VARICVE	Varicose veins
2	68463612	rs1375371	PPP3R1	A	G	G	0.1405	G	A	-0.1405	1.51985e-35	0.0113	459702	ebi-a-GCST90018939	Varicose veins
2	68463612	rs1375371	PPP3R1	A	G	G	0.00161313	G	A	-0.00161313	8.80035e-17	0.000193887	463010	ukb-b-1765	Operative procedures - secondary OPCS: L87.1 Stripping of long saphenous vein
2	68463612	rs1375371	PPP3R1	A	G	G	0.00194529	G	A	-0.00194529	7.00003e-17	0.000233072	463010	ukb-b-14422	Operative procedures - main OPCS: L85.1 Ligation of long saphenous vein
2	68463612	rs1375371	PPP3R1	A	G	G	0.00227766	G	A	-0.00227766	6.59933e-19	0.000256451	463010	ukb-b-4363	Operative procedures - secondary OPCS: L87.4 Avulsion of varicose vein of leg
2	68463612	rs1375371	PPP3R1	A	G	G	0.00298401	G	A	-0.00298401	2.88536e-16	0.000364863	337199	ukb-a-538	Diagnoses - main ICD10: I83 Varicose veins of lower extremities
2	68463612	rs1375371	PPP3R1	A	G	G	0.00346322	G	A	-0.00346322	1.9002e-27	0.000319054	463010	ukb-b-6720	Diagnoses - main ICD10: I83.9 Varicose veins of lower extremities without ulcer or inflammation
2	68463612	rs1375371	PPP3R1	A	G	G	0.00358893	G	A	-0.00358893	4.5867e-16	0.000441858	361194	ukb-d-I9_DISVEINLYMPH	Diseases of veins, lymphatic vessels and lymph nodes, not elsewhere classified
2	68463612	rs1375371	PPP3R1	A	G	G	0.00615948	G	A	-0.00615948	2.99985e-46	0.00043142	462933	ukb-b-15592	Operation code: varicose vein surgery
2	68463612	rs1375371	PPP3R1	A	G	G	-0.0077	G	A	0.0077	5.97998e-09	0.0013	360388	ebi-a-GCST90018959	Height
2	68463612	rs1375371	PPP3R1	A	G	G	-0.0129883	G	A	0.0129883	9.60064e-11	0.00209207	502773	ebi-a-GCST90029009	Waist-hip ratio
2	68463612	rs1375371	PPP3R1	A	G	G	-0.00910266	G	A	0.00910266	2.99999e-09	0.00162248	673878	ebi-a-GCST90029008	Height
2	68467910	rs6546363	PPP3R1	C	A	A	0.08	A	C	-0.08	2.23409e-11	0.012	NA	finn-b-FG_DISVEINLYMPH	Diseases of veins, lymphatic vessels and lymph nodes, not elsewhere classified (FINNGEN)
2	68467910	rs6546363	PPP3R1	C	A	A	0.0834	A	C	-0.0834	1.50487e-13	0.0113	NA	finn-b-I9_DISVEINLYMPH	Diseases of veins, lymphatic vessels and lymph nodes, not elsewhere classified
2	68467910	rs6546363	PPP3R1	C	A	A	0.1088	A	C	-0.1088	5.31618e-14	0.0145	NA	finn-b-I9_VARICVE_EXNONE	Varicose veins (no controls excluded)
2	68467910	rs6546363	PPP3R1	C	A	A	0.1131	A	C	-0.1131	9.39291e-15	0.0146	NA	finn-b-I9_VARICVE	Varicose veins
2	68467910	rs6546363	PPP3R1	C	A	A	0.1409	A	C	-0.1409	1.01088e-35	0.0113	459702	ebi-a-GCST90018939	Varicose veins
2	68467910	rs6546363	PPP3R1	C	A	A	0.1859	A	C	-0.1859	5.51201e-09	0.0319	728187	ieu-b-38	systolic blood pressure
2	68467910	rs6546363	PPP3R1	C	A	A	0.0022775	A	C	-0.0022775	6.70039e-19	0.000256504	463010	ukb-b-4363	Operative procedures - secondary OPCS: L87.4 Avulsion of varicose vein of leg
2	68467910	rs6546363	PPP3R1	C	A	A	0.00161373	A	C	-0.00161373	8.69961e-17	0.000193928	463010	ukb-b-1765	Operative procedures - secondary OPCS: L87.1 Stripping of long saphenous vein
2	68467910	rs6546363	PPP3R1	C	A	A	0.00194449	A	C	-0.00194449	7.39946e-17	0.00023312	463010	ukb-b-14422	Operative procedures - main OPCS: L85.1 Ligation of long saphenous vein
2	68467910	rs6546363	PPP3R1	C	A	A	0.00299065	A	C	-0.00299065	2.51478e-16	0.000364937	337199	ukb-a-538	Diagnoses - main ICD10: I83 Varicose veins of lower extremities
2	68467910	rs6546363	PPP3R1	C	A	A	0.00347228	A	C	-0.00347228	1.39991e-27	0.00031912	463010	ukb-b-6720	Diagnoses - main ICD10: I83.9 Varicose veins of lower extremities without ulcer or inflammation
2	68467910	rs6546363	PPP3R1	C	A	A	0.00360092	A	C	-0.00360092	3.71706e-16	0.000441948	361194	ukb-d-I9_DISVEINLYMPH	Diseases of veins, lymphatic vessels and lymph nodes, not elsewhere classified
2	68467910	rs6546363	PPP3R1	C	A	A	0.00615048	A	C	-0.00615048	4.30031e-46	0.00043151	462933	ukb-b-15592	Operation code: varicose vein surgery
2	68467910	rs6546363	PPP3R1	C	A	A	-0.0077	A	C	0.0077	7.60501e-09	0.0013	360388	ebi-a-GCST90018959	Height
2	68467910	rs6546363	PPP3R1	C	A	A	-0.0129765	A	C	0.0129765	1e-10	0.0020925	502773	ebi-a-GCST90029009	Waist-hip ratio
2	68467910	rs6546363	PPP3R1	C	A	A	-0.00908996	A	C	0.00908996	3.2e-09	0.00162281	673878	ebi-a-GCST90029008	Height
2	68475595	rs4671887	ENSG00000273064	A	C	C	0.141	C	A	-0.141	9.3713e-36	0.0113	459702	ebi-a-GCST90018939	Varicose veins
2	68475595	rs4671887	ENSG00000273064	A	C	C	0.0802	C	A	-0.0802	2.03002e-11	0.012	NA	finn-b-FG_DISVEINLYMPH	Diseases of veins, lymphatic vessels and lymph nodes, not elsewhere classified (FINNGEN)
2	68475595	rs4671887	ENSG00000273064	A	C	C	0.0834	C	A	-0.0834	1.52195e-13	0.0113	NA	finn-b-I9_DISVEINLYMPH	Diseases of veins, lymphatic vessels and lymph nodes, not elsewhere classified
2	68475595	rs4671887	ENSG00000273064	A	C	C	0.1091	C	A	-0.1091	4.8708e-14	0.0145	NA	finn-b-I9_VARICVE_EXNONE	Varicose veins (no controls excluded)
2	68475595	rs4671887	ENSG00000273064	A	C	C	0.1133	C	A	-0.1133	8.48008e-15	0.0146	NA	finn-b-I9_VARICVE	Varicose veins
2	68475595	rs4671887	ENSG00000273064	A	C	C	0.1856	C	A	-0.1856	6.14398e-09	0.0319	726363	ieu-b-38	systolic blood pressure
2	68475595	rs4671887	ENSG00000273064	A	C	C	0.0030026	C	A	-0.0030026	1.89671e-16	0.000364886	337199	ukb-a-538	Diagnoses - main ICD10: I83 Varicose veins of lower extremities
2	68475595	rs4671887	ENSG00000273064	A	C	C	0.00161029	C	A	-0.00161029	1e-16	0.000193905	463010	ukb-b-1765	Operative procedures - secondary OPCS: L87.1 Stripping of long saphenous vein
2	68475595	rs4671887	ENSG00000273064	A	C	C	0.00194264	C	A	-0.00194264	7.8001e-17	0.000233093	463010	ukb-b-14422	Operative procedures - main OPCS: L85.1 Ligation of long saphenous vein
2	68475595	rs4671887	ENSG00000273064	A	C	C	0.00227892	C	A	-0.00227892	6.4003e-19	0.000256474	463010	ukb-b-4363	Operative procedures - secondary OPCS: L87.4 Avulsion of varicose vein of leg
2	68475595	rs4671887	ENSG00000273064	A	C	C	0.00348733	C	A	-0.00348733	8.4004e-28	0.000319083	463010	ukb-b-6720	Diagnoses - main ICD10: I83.9 Varicose veins of lower extremities without ulcer or inflammation
2	68475595	rs4671887	ENSG00000273064	A	C	C	0.00360327	C	A	-0.00360327	3.52777e-16	0.000441893	361194	ukb-d-I9_DISVEINLYMPH	Diseases of veins, lymphatic vessels and lymph nodes, not elsewhere classified
2	68475595	rs4671887	ENSG00000273064	A	C	C	0.00616342	C	A	-0.00616342	2.70023e-46	0.000431459	462933	ukb-b-15592	Operation code: varicose vein surgery
2	68475595	rs4671887	ENSG00000273064	A	C	C	-0.0078	C	A	0.0078	4.98001e-09	0.0013	360388	ebi-a-GCST90018959	Height
2	68475595	rs4671887	ENSG00000273064	A	C	C	-0.0128942	C	A	0.0128942	1.29999e-10	0.00209225	502773	ebi-a-GCST90029009	Waist-hip ratio
2	68475595	rs4671887	ENSG00000273064	A	C	C	-0.00911479	C	A	0.00911479	2.90001e-09	0.00162262	673878	ebi-a-GCST90029008	Height
2	68477248	rs4671888	ENSG00000273064	C	T	T	0.0802	T	C	-0.0802	2.03002e-11	0.012	NA	finn-b-FG_DISVEINLYMPH	Diseases of veins, lymphatic vessels and lymph nodes, not elsewhere classified (FINNGEN)
2	68477248	rs4671888	ENSG00000273064	C	T	T	0.0834	T	C	-0.0834	1.52195e-13	0.0113	NA	finn-b-I9_DISVEINLYMPH	Diseases of veins, lymphatic vessels and lymph nodes, not elsewhere classified
2	68477248	rs4671888	ENSG00000273064	C	T	T	0.1091	T	C	-0.1091	4.8708e-14	0.0145	NA	finn-b-I9_VARICVE_EXNONE	Varicose veins (no controls excluded)
2	68477248	rs4671888	ENSG00000273064	C	T	T	0.1133	T	C	-0.1133	8.48008e-15	0.0146	NA	finn-b-I9_VARICVE	Varicose veins
2	68477248	rs4671888	ENSG00000273064	C	T	T	0.1416	T	C	-0.1416	6.03671e-36	0.0113	459702	ebi-a-GCST90018939	Varicose veins
2	68477248	rs4671888	ENSG00000273064	C	T	T	0.1845	T	C	-0.1845	8.03193e-09	0.032	724059	ieu-b-38	systolic blood pressure
2	68477248	rs4671888	ENSG00000273064	C	T	T	0.0016103	T	C	-0.0016103	1e-16	0.000193931	463010	ukb-b-1765	Operative procedures - secondary OPCS: L87.1 Stripping of long saphenous vein
2	68477248	rs4671888	ENSG00000273064	C	T	T	0.00194203	T	C	-0.00194203	8.10028e-17	0.000233124	463010	ukb-b-14422	Operative procedures - main OPCS: L85.1 Ligation of long saphenous vein
2	68477248	rs4671888	ENSG00000273064	C	T	T	0.00227812	T	C	-0.00227812	6.59933e-19	0.000256508	463010	ukb-b-4363	Operative procedures - secondary OPCS: L87.4 Avulsion of varicose vein of leg
2	68477248	rs4671888	ENSG00000273064	C	T	T	0.00300288	T	C	-0.00300288	1.89671e-16	0.000364921	337199	ukb-a-538	Diagnoses - main ICD10: I83 Varicose veins of lower extremities
2	68477248	rs4671888	ENSG00000273064	C	T	T	0.00348951	T	C	-0.00348951	7.89951e-28	0.000319125	463010	ukb-b-6720	Diagnoses - main ICD10: I83.9 Varicose veins of lower extremities without ulcer or inflammation
2	68477248	rs4671888	ENSG00000273064	C	T	T	0.00360115	T	C	-0.00360115	3.69573e-16	0.000441939	361194	ukb-d-I9_DISVEINLYMPH	Diseases of veins, lymphatic vessels and lymph nodes, not elsewhere classified
2	68477248	rs4671888	ENSG00000273064	C	T	T	0.00616268	T	C	-0.00616268	2.90001e-46	0.000431516	462933	ukb-b-15592	Operation code: varicose vein surgery
2	68477248	rs4671888	ENSG00000273064	C	T	T	-0.008	T	C	0.008	4.52304e-09	0.0014	360388	ebi-a-GCST90018959	Height
2	68477248	rs4671888	ENSG00000273064	C	T	T	-0.0129284	T	C	0.0129284	1.2e-10	0.00209254	502773	ebi-a-GCST90029009	Waist-hip ratio
2	68477248	rs4671888	ENSG00000273064	C	T	T	-0.00911183	T	C	0.00911183	2.99999e-09	0.00162284	673878	ebi-a-GCST90029008	Height
2	68478919	rs1947025	PPP3R1	G	A	A	0.1561	A	G	-0.1561	3.15864e-26	0.0147	459702	ebi-a-GCST90018939	Varicose veins
2	68478919	rs1947025	PPP3R1	G	A	A	0.1844	A	G	-0.1844	8.15098e-09	0.032	722600	ieu-b-38	systolic blood pressure
2	68478919	rs1947025	PPP3R1	G	A	A	0.0019459	A	G	-0.0019459	7.00003e-17	0.000233132	463010	ukb-b-14422	Operative procedures - main OPCS: L85.1 Ligation of long saphenous vein
2	68478919	rs1947025	PPP3R1	G	A	A	0.00161214	A	G	-0.00161214	9.3994e-17	0.000193938	463010	ukb-b-1765	Operative procedures - secondary OPCS: L87.1 Stripping of long saphenous vein
2	68478919	rs1947025	PPP3R1	G	A	A	0.00228687	A	G	-0.00228687	4.90004e-19	0.000256517	463010	ukb-b-4363	Operative procedures - secondary OPCS: L87.4 Avulsion of varicose vein of leg
2	68478919	rs1947025	PPP3R1	G	A	A	0.00298725	A	G	-0.00298725	2.72145e-16	0.000364945	337199	ukb-a-538	Diagnoses - main ICD10: I83 Varicose veins of lower extremities
2	68478919	rs1947025	PPP3R1	G	A	A	0.00351754	A	G	-0.00351754	2.99985e-28	0.000319136	463010	ukb-b-6720	Diagnoses - main ICD10: I83.9 Varicose veins of lower extremities without ulcer or inflammation
2	68478919	rs1947025	PPP3R1	G	A	A	0.00359087	A	G	-0.00359087	4.49676e-16	0.000441967	361194	ukb-d-I9_DISVEINLYMPH	Diseases of veins, lymphatic vessels and lymph nodes, not elsewhere classified
2	68478919	rs1947025	PPP3R1	G	A	A	0.00620573	A	G	-0.00620573	6.79986e-47	0.000431532	462933	ukb-b-15592	Operation code: varicose vein surgery
2	68478919	rs1947025	PPP3R1	G	A	A	-0.0079	A	G	0.0079	3.69403e-09	0.0013	360388	ebi-a-GCST90018959	Height
2	68478919	rs1947025	PPP3R1	G	A	A	-0.0129373	A	G	0.0129373	1.29999e-10	0.00209253	502773	ebi-a-GCST90029009	Waist-hip ratio
2	68478919	rs1947025	PPP3R1	G	A	A	-0.00901101	A	G	0.00901101	4.49997e-09	0.00162285	673878	ebi-a-GCST90029008	Height
2	173297783	rs75166599	ENSG00000226963	A	G	A	-0.175	A	G	-0.175	1.1311e-16	0.0211	211227	ebi-a-GCST90018905	Prostate cancer
2	173297783	rs75166599	ENSG00000226963	A	G	A	-0.2327	A	G	-0.2327	2.37083e-36	0.0185	140254	ebi-a-GCST006085	Prostate cancer
2	173297783	rs75166599	ENSG00000226963	A	G	A	-0.2327	A	G	-0.2327	2.37083e-36	0.0185	140254	ieu-b-85	Prostate cancer
2	173297783	rs75166599	ENSG00000226963	A	G	A	-0.0117128	A	G	-0.0117128	1e-13	0.00157547	182625	ieu-b-4809	Prostate cancer
2	173297783	rs75166599	ENSG00000226963	A	G	A	-0.176885	A	G	-0.176885	2.11091e-10	0.0278426	NA	bbj-a-148	Prostate cancer
2	173297783	rs75166599	ENSG00000226963	A	G	A	-0.00389221	A	G	-0.00389221	1.80011e-11	0.000578813	463010	ukb-b-1392	Type of cancer: ICD10: C61 Malignant neoplasm of prostate
2	173297783	rs75166599	ENSG00000226963	A	G	A	-0.00408043	A	G	-0.00408043	4.64184e-10	0.000654867	361194	ukb-d-C3_PROSTATE	Malignant neoplasm of prostate
2	173297783	rs75166599	ENSG00000226963	A	G	A	-0.0649031	A	G	-0.0649031	5.60015e-13	0.00900102	NA	met-d-Pyruvate	Pyruvate
2	173297783	rs75166599	ENSG00000226963	A	G	A	-0.0659883	A	G	-0.0659883	2.29985e-13	0.00900076	114749	ebi-a-GCST90092942	Pyruvate levels
2	173300939	rs75689576	ITGA6	A	G	A	-0.1825	A	G	-0.1825	1.6819e-20	0.0197	211227	ebi-a-GCST90018905	Prostate cancer
2	173300939	rs75689576	ITGA6	A	G	A	-0.2425	A	G	-0.2425	2.6767e-42	0.0178	140254	ebi-a-GCST006085	Prostate cancer
2	173300939	rs75689576	ITGA6	A	G	A	-0.2425	A	G	-0.2425	2.6767e-42	0.0178	140254	ieu-b-85	Prostate cancer
2	173300939	rs75689576	ITGA6	A	G	A	-0.011903	A	G	-0.011903	3.69999e-15	0.00151326	182625	ieu-b-4809	Prostate cancer
2	173300939	rs75689576	ITGA6	A	G	A	-0.157216	A	G	-0.157216	4.97382e-10	0.0252762	90332	ebi-a-GCST90018685	Prostate cancer
2	173300939	rs75689576	ITGA6	A	G	A	-0.167365	A	G	-0.167365	4.18215e-11	0.0253682	NA	bbj-a-148	Prostate cancer
2	173300939	rs75689576	ITGA6	A	G	A	-0.00254714	A	G	-0.00254714	3.85576e-09	0.000432421	337159	ukb-a-57	Cancer code self-reported: prostate cancer
2	173300939	rs75689576	ITGA6	A	G	A	-0.00394367	A	G	-0.00394367	1.29987e-12	0.000555679	463010	ukb-b-1392	Type of cancer: ICD10: C61 Malignant neoplasm of prostate
2	173300939	rs75689576	ITGA6	A	G	A	-0.00408689	A	G	-0.00408689	7.68599e-11	0.000628093	361194	ukb-d-C3_PROSTATE	Malignant neoplasm of prostate
2	173300939	rs75689576	ITGA6	A	G	A	-0.0637625	A	G	-0.0637625	1.69981e-13	0.00864742	NA	met-d-Pyruvate	Pyruvate
2	173300939	rs75689576	ITGA6	A	G	A	-0.0642585	A	G	-0.0642585	1.10002e-13	0.00864709	114749	ebi-a-GCST90092942	Pyruvate levels
2	173302006	rs79160711	ITGA6	G	A	G	-0.1824	G	A	-0.1824	1.58489e-20	0.0196	211227	ebi-a-GCST90018905	Prostate cancer
2	173302006	rs79160711	ITGA6	G	A	G	-0.2419	G	A	-0.2419	3.80978e-42	0.0178	140254	ebi-a-GCST006085	Prostate cancer
2	173302006	rs79160711	ITGA6	G	A	G	-0.2419	G	A	-0.2419	3.80978e-42	0.0178	140254	ieu-b-85	Prostate cancer
2	173302006	rs79160711	ITGA6	G	A	G	-0.0119001	G	A	-0.0119001	3.50026e-15	0.00151151	182625	ieu-b-4809	Prostate cancer
2	173302006	rs79160711	ITGA6	G	A	G	-0.157066	G	A	-0.157066	4.889e-10	0.0252411	90332	ebi-a-GCST90018685	Prostate cancer
2	173302006	rs79160711	ITGA6	G	A	G	-0.164208	G	A	-0.164208	5.26987e-11	0.0250199	NA	bbj-a-148	Prostate cancer
2	173302006	rs79160711	ITGA6	G	A	G	-0.00254603	G	A	-0.00254603	3.75128e-09	0.0004319	337159	ukb-a-57	Cancer code self-reported: prostate cancer
2	173302006	rs79160711	ITGA6	G	A	G	-0.00394162	G	A	-0.00394162	1.20005e-12	0.000555006	463010	ukb-b-1392	Type of cancer: ICD10: C61 Malignant neoplasm of prostate
2	173302006	rs79160711	ITGA6	G	A	G	-0.00408245	G	A	-0.00408245	7.6454e-11	0.000627336	361194	ukb-d-C3_PROSTATE	Malignant neoplasm of prostate
2	173302006	rs79160711	ITGA6	G	A	G	-0.0636392	G	A	-0.0636392	1.69981e-13	0.00863714	NA	met-d-Pyruvate	Pyruvate
2	173302006	rs79160711	ITGA6	G	A	G	-0.0641174	G	A	-0.0641174	1.10002e-13	0.00863681	114749	ebi-a-GCST90092942	Pyruvate levels
2	173311553	rs12621278	ITGA6	G	A	G	-0.1826	G	A	-0.1826	1.07399e-20	0.0196	211227	ebi-a-GCST90018905	Prostate cancer
2	173311553	rs12621278	ITGA6	G	A	G	-0.2423	G	A	-0.2423	2.22024e-42	0.0178	140254	ebi-a-GCST006085	Prostate cancer
2	173311553	rs12621278	ITGA6	G	A	G	-0.2423	G	A	-0.2423	2.22024e-42	0.0178	140254	ieu-b-85	Prostate cancer
2	173311553	rs12621278	ITGA6	G	A	G	-0.063098	G	A	-0.063098	1.9002e-13	0.00857756	NA	met-d-Pyruvate	Pyruvate
2	173311553	rs12621278	ITGA6	G	A	G	-0.0118068	G	A	-0.0118068	3.69999e-15	0.00150128	182625	ieu-b-4809	Prostate cancer
2	173311553	rs12621278	ITGA6	G	A	G	-0.157773	G	A	-0.157773	3.84999e-10	0.0252035	90332	ebi-a-GCST90018685	Prostate cancer
2	173311553	rs12621278	ITGA6	G	A	G	-0.164738	G	A	-0.164738	3.01787e-11	0.0247887	NA	bbj-a-148	Prostate cancer
2	173311553	rs12621278	ITGA6	G	A	G	-0.00253702	G	A	-0.00253702	3.34272e-09	0.000428988	337159	ukb-a-57	Cancer code self-reported: prostate cancer
2	173311553	rs12621278	ITGA6	G	A	G	-0.00389952	G	A	-0.00389952	1.50003e-12	0.000551157	463010	ukb-b-1392	Type of cancer: ICD10: C61 Malignant neoplasm of prostate
2	173311553	rs12621278	ITGA6	G	A	G	-0.00402039	G	A	-0.00402039	1.10164e-10	0.000623075	361194	ukb-d-C3_PROSTATE	Malignant neoplasm of prostate
2	173311553	rs12621278	ITGA6	G	A	G	-0.0635152	G	A	-0.0635152	1.29987e-13	0.00857721	114749	ebi-a-GCST90092942	Pyruvate levels
2	173313453	rs1574259	ITGA6	T	C	T	-0.1828	T	C	-0.1828	9.6117e-21	0.0196	211227	ebi-a-GCST90018905	Prostate cancer
2	173313453	rs1574259	ITGA6	T	C	T	-0.2442	T	C	-0.2442	5.57571e-43	0.0178	140254	ebi-a-GCST006085	Prostate cancer
2	173313453	rs1574259	ITGA6	T	C	T	-0.2442	T	C	-0.2442	5.57571e-43	0.0178	140254	ieu-b-85	Prostate cancer
2	173313453	rs1574259	ITGA6	T	C	T	-0.0118959	T	C	-0.0118959	2.49977e-15	0.00150297	182625	ieu-b-4809	Prostate cancer
2	173313453	rs1574259	ITGA6	T	C	T	-0.157623	T	C	-0.157623	3.86554e-10	0.0251819	90332	ebi-a-GCST90018685	Prostate cancer
2	173313453	rs1574259	ITGA6	T	C	T	-0.165025	T	C	-0.165025	2.82488e-11	0.0247956	NA	bbj-a-148	Prostate cancer
2	173313453	rs1574259	ITGA6	T	C	T	-0.00255186	T	C	-0.00255186	2.8024e-09	0.000429395	337159	ukb-a-57	Cancer code self-reported: prostate cancer
2	173313453	rs1574259	ITGA6	T	C	T	-0.00391608	T	C	-0.00391608	1.29987e-12	0.000551731	463010	ukb-b-1392	Type of cancer: ICD10: C61 Malignant neoplasm of prostate
2	173313453	rs1574259	ITGA6	T	C	T	-0.00404404	T	C	-0.00404404	8.931e-11	0.000623674	361194	ukb-d-C3_PROSTATE	Malignant neoplasm of prostate
2	173313453	rs1574259	ITGA6	T	C	T	-0.0632121	T	C	-0.0632121	1.80011e-13	0.00858642	NA	met-d-Pyruvate	Pyruvate
2	173313453	rs1574259	ITGA6	T	C	T	-0.0636247	T	C	-0.0636247	1.29987e-13	0.00858608	114749	ebi-a-GCST90092942	Pyruvate levels
2	173314713	rs12052253	ITGA6	T	A	T	-0.183	T	A	-0.183	8.62581e-21	0.0196	211227	ebi-a-GCST90018905	Prostate cancer
2	173314713	rs12052253	ITGA6	T	A	T	-0.2432	T	A	-0.2432	1.20088e-42	0.0178	140254	ebi-a-GCST006085	Prostate cancer
2	173314713	rs12052253	ITGA6	T	A	T	-0.2432	T	A	-0.2432	1.20088e-42	0.0178	140254	ieu-b-85	Prostate cancer
2	173314713	rs12052253	ITGA6	T	A	T	-0.0025495	T	A	-0.0025495	2.92388e-09	0.000429501	337159	ukb-a-57	Cancer code self-reported: prostate cancer
2	173314713	rs12052253	ITGA6	T	A	T	-0.0039103	T	A	-0.0039103	1.39991e-12	0.000551862	463010	ukb-b-1392	Type of cancer: ICD10: C61 Malignant neoplasm of prostate
2	173314713	rs12052253	ITGA6	T	A	T	-0.0118876	T	A	-0.0118876	2.60016e-15	0.00150338	182625	ieu-b-4809	Prostate cancer
2	173314713	rs12052253	ITGA6	T	A	T	-0.157994	T	A	-0.157994	3.51099e-10	0.0251809	90332	ebi-a-GCST90018685	Prostate cancer
2	173314713	rs12052253	ITGA6	T	A	T	-0.164736	T	A	-0.164736	3.06267e-11	0.0247965	NA	bbj-a-148	Prostate cancer
2	173314713	rs12052253	ITGA6	T	A	T	-0.00403765	T	A	-0.00403765	9.65828e-11	0.000623827	361194	ukb-d-C3_PROSTATE	Malignant neoplasm of prostate
2	173314713	rs12052253	ITGA6	T	A	T	-0.0631925	T	A	-0.0631925	1.9002e-13	0.00858818	NA	met-d-Pyruvate	Pyruvate
2	173314713	rs12052253	ITGA6	T	A	T	-0.0636088	T	A	-0.0636088	1.29987e-13	0.00858784	114749	ebi-a-GCST90092942	Pyruvate levels
2	173319112	rs16860426	ITGA6	T	A	T	-0.1807	T	A	-0.1807	2.9902e-20	0.0196	211227	ebi-a-GCST90018905	Prostate cancer
2	173319112	rs16860426	ITGA6	T	A	T	-0.2409	T	A	-0.2409	1.02306e-41	0.0178	140254	ebi-a-GCST006085	Prostate cancer
2	173319112	rs16860426	ITGA6	T	A	T	-0.2409	T	A	-0.2409	1.02306e-41	0.0178	140254	ieu-b-85	Prostate cancer
2	173319112	rs16860426	ITGA6	T	A	T	-0.0024891	T	A	-0.0024891	6.89446e-09	0.000429628	337159	ukb-a-57	Cancer code self-reported: prostate cancer
2	173319112	rs16860426	ITGA6	T	A	T	-0.063996	T	A	-0.063996	9.20026e-14	0.00858763	114749	ebi-a-GCST90092942	Pyruvate levels
2	173319112	rs16860426	ITGA6	T	A	T	-0.0117468	T	A	-0.0117468	5.60015e-15	0.00150339	182625	ieu-b-4809	Prostate cancer
2	173319112	rs16860426	ITGA6	T	A	T	-0.155924	T	A	-0.155924	6.47888e-10	0.0252372	90332	ebi-a-GCST90018685	Prostate cancer
2	173319112	rs16860426	ITGA6	T	A	T	-0.164611	T	A	-0.164611	3.35506e-11	0.0248279	NA	bbj-a-148	Prostate cancer
2	173319112	rs16860426	ITGA6	T	A	T	-0.00383727	T	A	-0.00383727	3.59998e-12	0.000552011	463010	ukb-b-1392	Type of cancer: ICD10: C61 Malignant neoplasm of prostate
2	173319112	rs16860426	ITGA6	T	A	T	-0.00393157	T	A	-0.00393157	2.97331e-10	0.000624024	361194	ukb-d-C3_PROSTATE	Malignant neoplasm of prostate
2	173319112	rs16860426	ITGA6	T	A	T	-0.0635601	T	A	-0.0635601	1.39991e-13	0.00858797	NA	met-d-Pyruvate	Pyruvate
2	173319930	rs77167534	ITGA6	T	C	T	-0.1849	T	C	-0.1849	1.14895e-20	0.0198	211227	ebi-a-GCST90018905	Prostate cancer
2	173319930	rs77167534	ITGA6	T	C	T	-0.2411	T	C	-0.2411	8.1508e-42	0.0178	140254	ebi-a-GCST006085	Prostate cancer
2	173319930	rs77167534	ITGA6	T	C	T	-0.2411	T	C	-0.2411	8.1508e-42	0.0178	140254	ieu-b-85	Prostate cancer
2	173319930	rs77167534	ITGA6	T	C	T	-0.0115836	T	C	-0.0115836	1.20005e-14	0.00150182	182625	ieu-b-4809	Prostate cancer
2	173319930	rs77167534	ITGA6	T	C	T	-0.162996	T	C	-0.162996	2.44709e-10	0.0257487	90332	ebi-a-GCST90018685	Prostate cancer
2	173319930	rs77167534	ITGA6	T	C	T	-0.174338	T	C	-0.174338	5.69902e-12	0.0253142	NA	bbj-a-148	Prostate cancer
2	173319930	rs77167534	ITGA6	T	C	T	-0.00376512	T	C	-0.00376512	8.9002e-12	0.000551838	463010	ukb-b-1392	Type of cancer: ICD10: C61 Malignant neoplasm of prostate
2	173319930	rs77167534	ITGA6	T	C	T	-0.00384377	T	C	-0.00384377	7.24953e-10	0.000623917	361194	ukb-d-C3_PROSTATE	Malignant neoplasm of prostate
2	173319930	rs77167534	ITGA6	T	C	T	-0.0644895	T	C	-0.0644895	6.09958e-14	0.00859211	NA	met-d-Pyruvate	Pyruvate
2	173319930	rs77167534	ITGA6	T	C	T	-0.0648937	T	C	-0.0648937	4.30031e-14	0.00859176	114749	ebi-a-GCST90092942	Pyruvate levels
2	173321413	rs16860438	ITGA6	T	A	T	-0.1856	T	A	-0.1856	8.82267e-21	0.0199	211227	ebi-a-GCST90018905	Prostate cancer
2	173321413	rs16860438	ITGA6	T	A	T	-0.2398	T	A	-0.2398	2.51304e-41	0.0178	140254	ebi-a-GCST006085	Prostate cancer
2	173321413	rs16860438	ITGA6	T	A	T	-0.2398	T	A	-0.2398	2.51304e-41	0.0178	140254	ieu-b-85	Prostate cancer
2	173321413	rs16860438	ITGA6	T	A	T	-0.0038421	T	A	-0.0038421	7.97811e-10	0.000625187	361194	ukb-d-C3_PROSTATE	Malignant neoplasm of prostate
2	173321413	rs16860438	ITGA6	T	A	T	-0.063937	T	A	-0.063937	1.10002e-13	0.00861028	114749	ebi-a-GCST90092942	Pyruvate levels
2	173321413	rs16860438	ITGA6	T	A	T	-0.0115767	T	A	-0.0115767	1.39991e-14	0.0015047	182625	ieu-b-4809	Prostate cancer
2	173321413	rs16860438	ITGA6	T	A	T	-0.164114	T	A	-0.164114	1.91628e-10	0.0257721	90332	ebi-a-GCST90018685	Prostate cancer
2	173321413	rs16860438	ITGA6	T	A	T	-0.175085	T	A	-0.175085	5.1428e-12	0.0253688	NA	bbj-a-148	Prostate cancer
2	173321413	rs16860438	ITGA6	T	A	T	-0.00375051	T	A	-0.00375051	1.20005e-11	0.000552898	463010	ukb-b-1392	Type of cancer: ICD10: C61 Malignant neoplasm of prostate
2	173321413	rs16860438	ITGA6	T	A	T	-0.0635728	T	A	-0.0635728	1.50003e-13	0.00861064	NA	met-d-Pyruvate	Pyruvate
2	173327823	rs74461567	ITGA6-AS1	T	C	T	-0.1835	T	C	-0.1835	3.01787e-20	0.0199	211227	ebi-a-GCST90018905	Prostate cancer
2	173327823	rs74461567	ITGA6-AS1	T	C	T	-0.2355	T	C	-0.2355	4.6957e-40	0.0178	140254	ebi-a-GCST006085	Prostate cancer
2	173327823	rs74461567	ITGA6-AS1	T	C	T	-0.2355	T	C	-0.2355	4.6957e-40	0.0178	140254	ieu-b-85	Prostate cancer
2	173327823	rs74461567	ITGA6-AS1	T	C	T	-0.0024838	T	C	-0.0024838	7.35411e-09	0.000429517	337159	ukb-a-57	Cancer code self-reported: prostate cancer
2	173327823	rs74461567	ITGA6-AS1	T	C	T	-0.0113465	T	C	-0.0113465	4.19952e-14	0.00150174	182625	ieu-b-4809	Prostate cancer
2	173327823	rs74461567	ITGA6-AS1	T	C	T	-0.160957	T	C	-0.160957	5.16785e-10	0.0259027	90332	ebi-a-GCST90018685	Prostate cancer
2	173327823	rs74461567	ITGA6-AS1	T	C	T	-0.170919	T	C	-0.170919	2.91608e-11	0.0256993	NA	bbj-a-148	Prostate cancer
2	173327823	rs74461567	ITGA6-AS1	T	C	T	-0.00367468	T	C	-0.00367468	2.80027e-11	0.000551881	463010	ukb-b-1392	Type of cancer: ICD10: C61 Malignant neoplasm of prostate
2	173327823	rs74461567	ITGA6-AS1	T	C	T	-0.00377737	T	C	-0.00377737	1.40958e-09	0.00062389	361194	ukb-d-C3_PROSTATE	Malignant neoplasm of prostate
2	173327823	rs74461567	ITGA6-AS1	T	C	T	-0.0631657	T	C	-0.0631657	2.09991e-13	0.00860055	NA	met-d-Pyruvate	Pyruvate
2	173327823	rs74461567	ITGA6-AS1	T	C	T	-0.0635024	T	C	-0.0635024	1.50003e-13	0.0086002	114749	ebi-a-GCST90092942	Pyruvate levels
2	173342416	rs16860515	ITGA6	T	C	T	-0.1839	T	C	-0.1839	5.76235e-20	0.0201	211227	ebi-a-GCST90018905	Prostate cancer
2	173342416	rs16860515	ITGA6	T	C	T	-0.2393	T	C	-0.2393	7.04206e-39	0.0184	140254	ebi-a-GCST006085	Prostate cancer
2	173342416	rs16860515	ITGA6	T	C	T	-0.2393	T	C	-0.2393	7.04206e-39	0.0184	140254	ieu-b-85	Prostate cancer
2	173342416	rs16860515	ITGA6	T	C	T	-0.0118282	T	C	-0.0118282	3.90032e-14	0.00156378	182625	ieu-b-4809	Prostate cancer
2	173342416	rs16860515	ITGA6	T	C	T	-0.162818	T	C	-0.162818	2.6499e-10	0.0257705	90332	ebi-a-GCST90018685	Prostate cancer
2	173342416	rs16860515	ITGA6	T	C	T	-0.169191	T	C	-0.169191	2.35559e-11	0.0253201	NA	bbj-a-148	Prostate cancer
2	173342416	rs16860515	ITGA6	T	C	T	-0.00387893	T	C	-0.00387893	1.50003e-11	0.000574988	463010	ukb-b-1392	Type of cancer: ICD10: C61 Malignant neoplasm of prostate
2	173342416	rs16860515	ITGA6	T	C	T	-0.00390487	T	C	-0.00390487	1.71795e-09	0.000648369	361194	ukb-d-C3_PROSTATE	Malignant neoplasm of prostate
2	173342416	rs16860515	ITGA6	T	C	T	-0.0679537	T	C	-0.0679537	3.40017e-14	0.0089623	NA	met-d-Pyruvate	Pyruvate
2	173342416	rs16860515	ITGA6	T	C	T	-0.0682573	T	C	-0.0682573	2.60016e-14	0.00896192	114749	ebi-a-GCST90092942	Pyruvate levels
2	173344128	rs9636257	ITGA6	A	G	A	-0.184	A	G	-0.184	3.83884e-20	0.02	211227	ebi-a-GCST90018905	Prostate cancer
2	173344128	rs9636257	ITGA6	A	G	A	-0.2387	A	G	-0.2387	8.98049e-39	0.0183	140254	ebi-a-GCST006085	Prostate cancer
2	173344128	rs9636257	ITGA6	A	G	A	-0.2387	A	G	-0.2387	8.98049e-39	0.0183	140254	ieu-b-85	Prostate cancer
2	173344128	rs9636257	ITGA6	A	G	A	-0.16903	A	G	-0.16903	2.29985e-11	0.0252828	NA	bbj-a-148	Prostate cancer
2	173344128	rs9636257	ITGA6	A	G	A	-0.0038765	A	G	-0.0038765	1.39991e-11	0.000573876	463010	ukb-b-1392	Type of cancer: ICD10: C61 Malignant neoplasm of prostate
2	173344128	rs9636257	ITGA6	A	G	A	-0.0117847	A	G	-0.0117847	4.30031e-14	0.00156066	182625	ieu-b-4809	Prostate cancer
2	173344128	rs9636257	ITGA6	A	G	A	-0.163287	A	G	-0.163287	1.82991e-10	0.0256137	90332	ebi-a-GCST90018685	Prostate cancer
2	173344128	rs9636257	ITGA6	A	G	A	-0.00255463	A	G	-0.00255463	9.80618e-09	0.000445508	337159	ukb-a-57	Cancer code self-reported: prostate cancer
2	173344128	rs9636257	ITGA6	A	G	A	-0.00388422	A	G	-0.00388422	1.94138e-09	0.000647068	361194	ukb-d-C3_PROSTATE	Malignant neoplasm of prostate
2	173344128	rs9636257	ITGA6	A	G	A	-0.0687293	A	G	-0.0687293	1.50003e-14	0.00894453	NA	met-d-Pyruvate	Pyruvate
2	173344128	rs9636257	ITGA6	A	G	A	-0.0690424	A	G	-0.0690424	1.20005e-14	0.00894415	114749	ebi-a-GCST90092942	Pyruvate levels
2	173352157	rs2293648	ITGA6	T	A	T	-0.235	T	A	-0.235	1.3219e-37	0.0183	140254	ebi-a-GCST006085	Prostate cancer
2	173352157	rs2293648	ITGA6	T	A	T	-0.235	T	A	-0.235	1.3219e-37	0.0183	140254	ieu-b-85	Prostate cancer
2	173352157	rs2293648	ITGA6	T	A	T	-0.1811	T	A	-0.1811	1.31401e-19	0.02	211227	ebi-a-GCST90018905	Prostate cancer
2	173352157	rs2293648	ITGA6	T	A	T	-0.0117767	T	A	-0.0117767	4.70002e-14	0.00156216	182625	ieu-b-4809	Prostate cancer
2	173352157	rs2293648	ITGA6	T	A	T	-0.158748	T	A	-0.158748	5.098e-10	0.0255384	90332	ebi-a-GCST90018685	Prostate cancer
2	173352157	rs2293648	ITGA6	T	A	T	-0.164954	T	A	-0.164954	5.92243e-11	0.0252003	NA	bbj-a-148	Prostate cancer
2	173352157	rs2293648	ITGA6	T	A	T	-0.00387616	T	A	-0.00387616	1.50003e-11	0.000574427	463010	ukb-b-1392	Type of cancer: ICD10: C61 Malignant neoplasm of prostate
2	173352157	rs2293648	ITGA6	T	A	T	-0.00391797	T	A	-0.00391797	1.46012e-09	0.00064772	361194	ukb-d-C3_PROSTATE	Malignant neoplasm of prostate
2	173352157	rs2293648	ITGA6	T	A	T	-0.0683516	T	A	-0.0683516	2.29985e-14	0.00895277	NA	met-d-Pyruvate	Pyruvate
2	173352157	rs2293648	ITGA6	T	A	T	-0.0686785	T	A	-0.0686785	1.69981e-14	0.00895239	114749	ebi-a-GCST90092942	Pyruvate levels
2	173363917	rs7596665	ENSG00000225205	C	A	G	-0.095943	A	A	-0.095943	8.4004e-56	0.00609656	114749	ebi-a-GCST90092942	Pyruvate levels
2	173363917	rs7596665	ENSG00000225205	C	A	G	-0.0957315	A	A	-0.0957315	1.50003e-55	0.00609688	NA	met-d-Pyruvate	Pyruvate
2	173363917	rs7596665	ENSG00000225205	G	A	G	-0.235	G	A	-0.235	1.29211e-37	0.0183	140254	ebi-a-GCST006085	Prostate cancer
2	173363917	rs7596665	ENSG00000225205	G	A	G	-0.235	G	A	-0.235	1.29211e-37	0.0183	140254	ieu-b-85	Prostate cancer
2	173363917	rs7596665	ENSG00000225205	G	A	G	-0.2165	G	A	-0.2165	1.59993e-11	0.0321	211227	ebi-a-GCST90018905	Prostate cancer
2	173363917	rs7596665	ENSG00000225205	G	A	G	-0.0039171	G	A	-0.0039171	1.44235e-09	0.000647365	361194	ukb-d-C3_PROSTATE	Malignant neoplasm of prostate
2	173363917	rs7596665	ENSG00000225205	G	A	G	-0.0118266	G	A	-0.0118266	3.59998e-14	0.00156132	182625	ieu-b-4809	Prostate cancer
2	173363917	rs7596665	ENSG00000225205	G	A	G	-0.00388966	G	A	-0.00388966	1.20005e-11	0.00057406	463010	ukb-b-1392	Type of cancer: ICD10: C61 Malignant neoplasm of prostate
2	173363917	rs7596665	ENSG00000225205	G	A	G	-0.0680046	G	A	-0.0680046	2.99985e-14	0.00894779	NA	met-d-Pyruvate	Pyruvate
2	173363917	rs7596665	ENSG00000225205	G	A	G	-0.0683291	G	A	-0.0683291	2.19989e-14	0.00894742	114749	ebi-a-GCST90092942	Pyruvate levels
2	173368358	rs16860634	ITGA6	G	T	G	-0.181	G	T	-0.181	1.39605e-19	0.02	211227	ebi-a-GCST90018905	Prostate cancer
2	173368358	rs16860634	ITGA6	G	T	G	-0.2358	G	T	-0.2358	7.16143e-38	0.0183	140254	ebi-a-GCST006085	Prostate cancer
2	173368358	rs16860634	ITGA6	G	T	G	-0.2358	G	T	-0.2358	7.16143e-38	0.0183	140254	ieu-b-85	Prostate cancer
2	173368358	rs16860634	ITGA6	G	T	G	-0.0117281	G	T	-0.0117281	5.90065e-14	0.00156176	182625	ieu-b-4809	Prostate cancer
2	173368358	rs16860634	ITGA6	G	T	G	-0.159024	G	T	-0.159024	4.86004e-10	0.0255519	90332	ebi-a-GCST90018685	Prostate cancer
2	173368358	rs16860634	ITGA6	G	T	G	-0.165718	G	T	-0.165718	5.08159e-11	0.0252291	NA	bbj-a-148	Prostate cancer
2	173368358	rs16860634	ITGA6	G	T	G	-0.00385808	G	T	-0.00385808	1.80011e-11	0.000574301	463010	ukb-b-1392	Type of cancer: ICD10: C61 Malignant neoplasm of prostate
2	173368358	rs16860634	ITGA6	G	T	G	-0.00390057	G	T	-0.00390057	1.7084e-09	0.000647558	361194	ukb-d-C3_PROSTATE	Malignant neoplasm of prostate
2	173368358	rs16860634	ITGA6	G	T	G	-0.0683296	G	T	-0.0683296	2.29985e-14	0.00895032	NA	met-d-Pyruvate	Pyruvate
2	173368358	rs16860634	ITGA6	G	T	G	-0.0685347	G	T	-0.0685347	1.9002e-14	0.00894995	114749	ebi-a-GCST90092942	Pyruvate levels
2	179603225	rs2253324	TTN-AS1	A	G	A	0.2276	A	G	0.2276	1.59404e-14	0.0296	10708	ebi-a-GCST90019479	Peptidyl-prolyl cis-trans isomerase FKBP7 measurement
2	179603225	rs2253324	TTN-AS1	A	G	A	-0.0326211	A	G	-0.0326211	7.8001e-11	0.00501539	436424	ukb-b-18103	Pulse rate, automated reading
2	179604160	rs1883085	TTN	G	T	G	0.2241	G	T	0.2241	3.54324e-14	0.0296	10708	ebi-a-GCST90019479	Peptidyl-prolyl cis-trans isomerase FKBP7 measurement
2	179604160	rs1883085	TTN	G	T	G	-0.0327944	G	T	-0.0327944	5.70033e-11	0.0050056	436424	ukb-b-18103	Pulse rate, automated reading
2	179604366	rs2562829	TTN	G	T	G	0.2256	G	T	0.2256	2.40326e-14	0.0296	10708	ebi-a-GCST90019479	Peptidyl-prolyl cis-trans isomerase FKBP7 measurement
2	179604366	rs2562829	TTN	G	T	G	-0.0326775	G	T	-0.0326775	6.20012e-11	0.00499794	436424	ukb-b-18103	Pulse rate, automated reading
2	179604742	rs1883084	TTN	A	G	A	0.2262	A	G	0.2262	2.208e-14	0.0296	10708	ebi-a-GCST90019479	Peptidyl-prolyl cis-trans isomerase FKBP7 measurement
2	179604742	rs1883084	TTN	A	G	A	-0.0326062	A	G	-0.0326062	7.8001e-11	0.00501321	436424	ukb-b-18103	Pulse rate, automated reading
2	179605705	rs2742357	TTN	G	A	G	0.2268	G	A	0.2268	1.88191e-14	0.0296	10708	ebi-a-GCST90019479	Peptidyl-prolyl cis-trans isomerase FKBP7 measurement
2	179605705	rs2742357	TTN	G	A	G	-0.0326651	G	A	-0.0326651	7.29962e-11	0.00501454	436424	ukb-b-18103	Pulse rate, automated reading
2	179607487	rs74733167	TTN-AS1	C	T	C	0.2275	C	T	0.2275	1.56892e-14	0.0296	10708	ebi-a-GCST90019479	Peptidyl-prolyl cis-trans isomerase FKBP7 measurement
2	179607487	rs74733167	TTN-AS1	C	T	C	-0.0326842	C	T	-0.0326842	7.10068e-11	0.00501481	436424	ukb-b-18103	Pulse rate, automated reading
2	179609005	rs75210824	TTN-AS1	A	G	A	0.2292	A	G	0.2292	1.08993e-14	0.0297	10708	ebi-a-GCST90019479	Peptidyl-prolyl cis-trans isomerase FKBP7 measurement
2	179609005	rs75210824	TTN-AS1	A	G	A	-0.0327455	A	G	-0.0327455	6.59933e-11	0.00501528	436424	ukb-b-18103	Pulse rate, automated reading
2	179609978	rs56120016	TTN	C	A	C	0.2291	C	A	0.2291	1.11096e-14	0.0297	10708	ebi-a-GCST90019479	Peptidyl-prolyl cis-trans isomerase FKBP7 measurement
2	179609978	rs56120016	TTN	C	A	C	-0.0326702	C	A	-0.0326702	7.39946e-11	0.00501661	436424	ukb-b-18103	Pulse rate, automated reading
2	179610009	rs72648917	TTN	G	T	G	0.2271	G	T	0.2271	1.77582e-14	0.0296	10708	ebi-a-GCST90019479	Peptidyl-prolyl cis-trans isomerase FKBP7 measurement
2	179610009	rs72648917	TTN	G	T	G	-0.0326944	G	T	-0.0326944	7.00003e-11	0.00501334	436424	ukb-b-18103	Pulse rate, automated reading
2	179617370	rs16866497	TTN	C	T	C	0.2308	C	T	0.2308	7.32656e-15	0.0297	10708	ebi-a-GCST90019479	Peptidyl-prolyl cis-trans isomerase FKBP7 measurement
2	179617370	rs16866497	TTN	C	T	C	-0.032668	C	T	-0.032668	7.8001e-11	0.00502255	436424	ukb-b-18103	Pulse rate, automated reading
2	179622805	rs77535462	TTN-AS1	G	A	G	0.2318	G	A	0.2318	5.83848e-15	0.0297	10708	ebi-a-GCST90019479	Peptidyl-prolyl cis-trans isomerase FKBP7 measurement
2	179622805	rs77535462	TTN-AS1	G	A	G	-0.0327378	G	A	-0.0327378	7.10068e-11	0.00502196	436424	ukb-b-18103	Pulse rate, automated reading
2	179631851	rs12470905	TTN-AS1	A	C	A	0.239	A	C	0.239	6.11928e-16	0.0296	10708	ebi-a-GCST90019479	Peptidyl-prolyl cis-trans isomerase FKBP7 measurement
2	179631851	rs12470905	TTN-AS1	A	C	A	-0.031701	A	C	-0.031701	2.1e-10	0.00498919	436424	ukb-b-18103	Pulse rate, automated reading
2	179634936	rs2306636	TTN	T	C	T	0.2349	T	C	0.2349	1.77215e-15	0.0295	10708	ebi-a-GCST90019479	Peptidyl-prolyl cis-trans isomerase FKBP7 measurement
2	179634936	rs2306636	TTN	T	C	T	-0.0312568	T	C	-0.0312568	2.59998e-10	0.00494347	436424	ukb-b-18103	Pulse rate, automated reading
2	179635850	rs2291304	TTN-AS1	C	T	C	0.2384	C	T	0.2384	8.63177e-16	0.0296	10708	ebi-a-GCST90019479	Peptidyl-prolyl cis-trans isomerase FKBP7 measurement
2	179635850	rs2291304	TTN-AS1	C	T	C	-0.03167	C	T	-0.03167	2.30001e-10	0.00499322	436424	ukb-b-18103	Pulse rate, automated reading
2	179636257	rs2291305	TTN-AS1	A	T	A	0.2384	A	T	0.2384	8.69561e-16	0.0296	10708	ebi-a-GCST90019479	Peptidyl-prolyl cis-trans isomerase FKBP7 measurement
2	179636257	rs2291305	TTN-AS1	A	T	A	-0.0316626	A	T	-0.0316626	2.30001e-10	0.00499326	436424	ukb-b-18103	Pulse rate, automated reading
2	179636668	rs80133134	TTN-AS1	C	T	C	0.2384	C	T	0.2384	8.69761e-16	0.0296	10708	ebi-a-GCST90019479	Peptidyl-prolyl cis-trans isomerase FKBP7 measurement
2	179636668	rs80133134	TTN-AS1	C	T	C	-0.0317232	C	T	-0.0317232	2.1e-10	0.00499353	436424	ukb-b-18103	Pulse rate, automated reading
2	179637861	rs56142888	TTN	G	C	G	0.2327	G	C	0.2327	5.56929e-15	0.0298	10708	ebi-a-GCST90019479	Peptidyl-prolyl cis-trans isomerase FKBP7 measurement
2	179637861	rs56142888	TTN	G	C	G	-0.0323351	G	C	-0.0323351	1.09999e-10	0.00501512	436424	ukb-b-18103	Pulse rate, automated reading
2	179641975	rs12476289	TTN	T	C	T	0.2343	T	C	0.2343	3.58426e-15	0.0298	10708	ebi-a-GCST90019479	Peptidyl-prolyl cis-trans isomerase FKBP7 measurement
2	179641975	rs12476289	TTN	T	C	T	-0.0325082	T	C	-0.0325082	1e-10	0.00502694	436424	ukb-b-18103	Pulse rate, automated reading
2	179644160	rs2291308	TTN	C	T	C	0.2329	C	T	0.2329	5.49161e-15	0.0298	10708	ebi-a-GCST90019479	Peptidyl-prolyl cis-trans isomerase FKBP7 measurement
2	179644160	rs2291308	TTN	C	T	C	-0.0324807	C	T	-0.0324807	1e-10	0.00502711	436424	ukb-b-18103	Pulse rate, automated reading
2	179645285	rs16866532	TTN-AS1	G	C	G	0.2328	G	C	0.2328	5.54243e-15	0.0298	10708	ebi-a-GCST90019479	Peptidyl-prolyl cis-trans isomerase FKBP7 measurement
2	179645285	rs16866532	TTN-AS1	G	C	G	-0.0324494	G	C	-0.0324494	1.09999e-10	0.00502749	436424	ukb-b-18103	Pulse rate, automated reading
2	179645731	rs12464703	TTN-AS1	A	C	A	0.2328	A	C	0.2328	5.59371e-15	0.0298	10708	ebi-a-GCST90019479	Peptidyl-prolyl cis-trans isomerase FKBP7 measurement
2	179645731	rs12464703	TTN-AS1	A	C	A	-0.0324479	A	C	-0.0324479	1.09999e-10	0.00502778	436424	ukb-b-18103	Pulse rate, automated reading
2	179647546	rs55863869	TTN	G	A	G	0.2103	G	A	0.2103	6.25461e-13	0.0292	10708	ebi-a-GCST90019479	Peptidyl-prolyl cis-trans isomerase FKBP7 measurement
2	179660954	rs77903023	TTN	T	A	T	0.228	T	A	0.228	2.0649e-14	0.0298	10708	ebi-a-GCST90019479	Peptidyl-prolyl cis-trans isomerase FKBP7 measurement
2	179660954	rs77903023	TTN	T	A	T	-0.0328736	T	A	-0.0328736	5.40008e-11	0.0050125	436424	ukb-b-18103	Pulse rate, automated reading
2	179666246	rs3769860	TTN	A	T	A	0.2287	A	T	0.2287	1.64097e-14	0.0298	10708	ebi-a-GCST90019479	Peptidyl-prolyl cis-trans isomerase FKBP7 measurement
2	179666246	rs3769860	TTN	A	T	A	-0.0328688	A	T	-0.0328688	5.40008e-11	0.00501131	436424	ukb-b-18103	Pulse rate, automated reading
2	179666425	rs77690739	TTN	A	G	A	0.2285	A	G	0.2285	1.79308e-14	0.0298	10708	ebi-a-GCST90019479	Peptidyl-prolyl cis-trans isomerase FKBP7 measurement
2	179666425	rs77690739	TTN	A	G	A	-0.0328679	A	G	-0.0328679	5.40008e-11	0.0050113	436424	ukb-b-18103	Pulse rate, automated reading
2	179672462	rs72647839	TTN	G	A	G	0.2323	G	A	0.2323	7.43875e-15	0.0299	10708	ebi-a-GCST90019479	Peptidyl-prolyl cis-trans isomerase FKBP7 measurement
2	179672462	rs72647839	TTN	G	A	G	-0.0325058	G	A	-0.0325058	9.30037e-11	0.00501814	436424	ukb-b-18103	Pulse rate, automated reading
2	179674471	rs116714897	TTN	G	T	G	0.2325	G	T	0.2325	7.11377e-15	0.0299	10708	ebi-a-GCST90019479	Peptidyl-prolyl cis-trans isomerase FKBP7 measurement
2	179674471	rs116714897	TTN	G	T	G	-0.0324508	G	T	-0.0324508	9.70063e-11	0.00501421	436424	ukb-b-18103	Pulse rate, automated reading
2	179676118	rs76366029	TTN	T	G	T	0.2317	T	G	0.2317	8.67761e-15	0.0299	10708	ebi-a-GCST90019479	Peptidyl-prolyl cis-trans isomerase FKBP7 measurement
2	179676118	rs76366029	TTN	T	G	T	-0.0324071	T	G	-0.0324071	1e-10	0.00501358	436424	ukb-b-18103	Pulse rate, automated reading
2	179678889	rs76647828	TTN	G	A	G	0.2318	G	A	0.2318	8.56446e-15	0.0299	10708	ebi-a-GCST90019479	Peptidyl-prolyl cis-trans isomerase FKBP7 measurement
2	179678889	rs76647828	TTN	G	A	G	-0.0324003	G	A	-0.0324003	1e-10	0.00501334	436424	ukb-b-18103	Pulse rate, automated reading
2	179679810	rs74841078	TTN	T	C	T	0.2314	T	C	0.2314	9.50605e-15	0.0299	10708	ebi-a-GCST90019479	Peptidyl-prolyl cis-trans isomerase FKBP7 measurement
2	179679810	rs74841078	TTN	T	C	T	-0.032393	T	C	-0.032393	1e-10	0.00501325	436424	ukb-b-18103	Pulse rate, automated reading
2	179684957	rs79595351	TTN	A	G	A	0.2306	A	G	0.2306	1.17193e-14	0.0299	10708	ebi-a-GCST90019479	Peptidyl-prolyl cis-trans isomerase FKBP7 measurement
2	179684957	rs79595351	TTN	A	G	A	-0.0327253	A	G	-0.0327253	6.79986e-11	0.00501466	436424	ukb-b-18103	Pulse rate, automated reading
2	179687500	rs75748886	TTN	T	C	T	0.2379	T	C	0.2379	1.10002e-15	0.0297	10708	ebi-a-GCST90019479	Peptidyl-prolyl cis-trans isomerase FKBP7 measurement
2	179687500	rs75748886	TTN	T	C	T	-0.0315349	T	C	-0.0315349	2.1e-10	0.00496531	436424	ukb-b-18103	Pulse rate, automated reading
2	179688530	rs56030306	ENSG00000287149	T	G	T	0.2295	T	G	0.2295	1.53285e-14	0.0299	10708	ebi-a-GCST90019479	Peptidyl-prolyl cis-trans isomerase FKBP7 measurement
2	179688530	rs56030306	ENSG00000287149	T	G	T	-0.0331089	T	G	-0.0331089	4.19952e-11	0.00501774	436424	ukb-b-18103	Pulse rate, automated reading
2	179703487	rs12476203	CCDC141	A	T	A	-0.0227733	A	T	-0.0227733	5.1e-10	0.00366442	436424	ukb-b-18103	Pulse rate, automated reading
2	179706977	rs12468141	CCDC141	G	A	G	-0.0227757	G	A	-0.0227757	4.70002e-10	0.00365677	436424	ukb-b-18103	Pulse rate, automated reading
2	179707546	rs79107654	CCDC141	A	G	A	-0.0227952	A	G	-0.0227952	4.60002e-10	0.00365684	436424	ukb-b-18103	Pulse rate, automated reading
2	179707917	rs966783	CCDC141	T	C	T	-0.022813	T	C	-0.022813	4.39997e-10	0.00365679	436424	ukb-b-18103	Pulse rate, automated reading
2	179708488	rs55913885	CCDC141	T	C	T	-0.0228238	T	C	-0.0228238	4.30002e-10	0.00365656	436424	ukb-b-18103	Pulse rate, automated reading
2	179710000	rs17453396	CCDC141	G	A	G	-0.0227608	G	A	-0.0227608	5e-10	0.00365922	436424	ukb-b-18103	Pulse rate, automated reading
2	179710550	rs17453403	CCDC141	G	C	G	-0.0229925	G	C	-0.0229925	3.09999e-10	0.00365186	436424	ukb-b-18103	Pulse rate, automated reading
2	179710550	rs17453403	CCDC141	G	C	G	-0.0252959	G	C	-0.0252959	6.39219e-09	0.00435662	317756	ukb-a-3	Pulse rate automated reading
2	179716710	rs80196587	CCDC141	A	C	A	2.6797	A	C	2.6797	3.31589e-11	0.4041	NA	finn-b-G6_MUSDYST	Muscular dystrophy
2	179716710	rs80196587	CCDC141	A	C	A	-0.0226437	A	C	-0.0226437	6.80002e-10	0.00366958	436424	ukb-b-18103	Pulse rate, automated reading
2	179721032	rs12464157	CCDC141	T	C	T	2.6797	T	C	2.6797	3.31589e-11	0.4041	NA	finn-b-G6_MUSDYST	Muscular dystrophy
2	179721032	rs12464157	CCDC141	T	C	T	-0.0228905	T	C	-0.0228905	4.09996e-10	0.00366199	436424	ukb-b-18103	Pulse rate, automated reading
2	179728006	rs79984883	CCDC141	T	C	T	2.6726	T	C	2.6726	3.49382e-11	0.4035	NA	finn-b-G6_MUSDYST	Muscular dystrophy
2	179728006	rs79984883	CCDC141	T	C	T	-0.0222775	T	C	-0.0222775	9.80009e-10	0.0036446	436424	ukb-b-18103	Pulse rate, automated reading
2	179728644	rs12477340	CCDC141	C	T	C	2.6741	C	T	2.6741	3.46418e-11	0.4036	NA	finn-b-G6_MUSDYST	Muscular dystrophy
2	179728644	rs12477340	CCDC141	C	T	C	-0.0230916	C	T	-0.0230916	2.80001e-10	0.00365965	436424	ukb-b-18103	Pulse rate, automated reading
2	179728644	rs12477340	CCDC141	C	T	C	-0.0252235	C	T	-0.0252235	7.54675e-09	0.0043651	317756	ukb-a-3	Pulse rate automated reading
2	179730852	rs79220514	CCDC141	G	A	G	2.6703	G	A	2.6703	6.57658e-11	0.4089	NA	finn-b-G6_MUSDYST	Muscular dystrophy
2	179730852	rs79220514	CCDC141	G	A	G	-0.0225659	G	A	-0.0225659	5.89997e-10	0.00364444	436424	ukb-b-18103	Pulse rate, automated reading
2	179730852	rs79220514	CCDC141	G	A	G	-0.0249564	G	A	-0.0249564	9.74945e-09	0.00435146	317756	ukb-a-3	Pulse rate automated reading
2	179733011	rs76209803	CCDC141	T	A	T	2.6873	T	A	2.6873	3.12033e-11	0.4047	NA	finn-b-G6_MUSDYST	Muscular dystrophy
2	179733011	rs76209803	CCDC141	T	A	T	-0.0224892	T	A	-0.0224892	7.00003e-10	0.00364742	436424	ukb-b-18103	Pulse rate, automated reading
2	179733567	rs77424589	CCDC141	C	T	C	2.6873	C	T	2.6873	3.12033e-11	0.4047	NA	finn-b-G6_MUSDYST	Muscular dystrophy
2	179733567	rs77424589	CCDC141	C	T	C	-0.0225204	C	T	-0.0225204	6.59994e-10	0.00364722	436424	ukb-b-18103	Pulse rate, automated reading
2	179743525	rs75825604	ENSG00000287149	G	A	G	2.6764	G	A	2.6764	3.37987e-11	0.4037	NA	finn-b-G6_MUSDYST	Muscular dystrophy
2	179743525	rs75825604	ENSG00000287149	G	A	G	-0.0239199	G	A	-0.0239199	5.60015e-11	0.00364916	436424	ukb-b-18103	Pulse rate, automated reading
2	179743525	rs75825604	ENSG00000287149	G	A	G	-0.0255786	G	A	-0.0255786	4.07972e-09	0.00434929	317756	ukb-a-3	Pulse rate automated reading
2	179743944	rs74712898	ENSG00000287149	C	T	C	2.6766	C	T	2.6766	3.37676e-11	0.4038	NA	finn-b-G6_MUSDYST	Muscular dystrophy
2	179743944	rs74712898	ENSG00000287149	C	T	C	-0.023298	C	T	-0.023298	1.40001e-10	0.00363133	436424	ukb-b-18103	Pulse rate, automated reading
2	179743944	rs74712898	ENSG00000287149	C	T	C	-0.0251862	C	T	-0.0251862	6.13804e-09	0.00433265	317756	ukb-a-3	Pulse rate automated reading
2	179745126	rs75472517	ENSG00000287149	C	A	C	2.6711	C	A	2.6711	3.51318e-11	0.4033	NA	finn-b-G6_MUSDYST	Muscular dystrophy
2	179745126	rs75472517	ENSG00000287149	C	A	C	-0.024993	C	A	-0.024993	8.10793e-09	0.00433428	317756	ukb-a-3	Pulse rate automated reading
2	179745126	rs75472517	ENSG00000287149	C	A	C	-0.0232337	C	A	-0.0232337	1.6e-10	0.00363256	436424	ukb-b-18103	Pulse rate, automated reading
2	179745150	rs78203729	ENSG00000287149	C	T	C	2.6711	C	T	2.6711	3.51318e-11	0.4033	NA	finn-b-G6_MUSDYST	Muscular dystrophy
2	179745150	rs78203729	ENSG00000287149	C	T	C	-0.0232385	C	T	-0.0232385	1.6e-10	0.00363256	436424	ukb-b-18103	Pulse rate, automated reading
2	179745150	rs78203729	ENSG00000287149	C	T	C	-0.0249996	C	T	-0.0249996	8.03545e-09	0.00433429	317756	ukb-a-3	Pulse rate automated reading
2	179749054	rs74268226	CCDC141	G	A	G	2.6775	G	A	2.6775	3.35197e-11	0.4038	NA	finn-b-G6_MUSDYST	Muscular dystrophy
2	179749054	rs74268226	CCDC141	G	A	G	-0.0240265	G	A	-0.0240265	4.60045e-11	0.0036494	436424	ukb-b-18103	Pulse rate, automated reading
2	179749054	rs74268226	CCDC141	G	A	G	-0.0256477	G	A	-0.0256477	3.71065e-09	0.00434945	317756	ukb-a-3	Pulse rate automated reading
2	179750406	rs74343581	CCDC141	G	T	G	2.6719	G	T	2.6719	3.48578e-11	0.4033	NA	finn-b-G6_MUSDYST	Muscular dystrophy
2	179750406	rs74343581	CCDC141	G	T	G	-0.0233991	G	T	-0.0233991	1.2e-10	0.00363088	436424	ukb-b-18103	Pulse rate, automated reading
2	179750406	rs74343581	CCDC141	G	T	G	-0.0254399	G	T	-0.0254399	4.31032e-09	0.00433242	317756	ukb-a-3	Pulse rate automated reading
2	179754103	rs76294595	CCDC141	T	C	T	2.676	T	C	2.676	3.35738e-11	0.4036	NA	finn-b-G6_MUSDYST	Muscular dystrophy
2	179754103	rs76294595	CCDC141	T	C	T	-0.0242032	T	C	-0.0242032	3.80014e-11	0.00366115	436424	ukb-b-18103	Pulse rate, automated reading
2	179754103	rs76294595	CCDC141	T	C	T	-0.0260985	T	C	-0.0260985	2.21289e-09	0.00436319	317756	ukb-a-3	Pulse rate automated reading
2	238877170	rs62194507	UBE2F	G	C	G	-0.0109	G	C	-0.0109	1.84701e-10	0.0017	349856	ebi-a-GCST90018953	Eosinophil counts
2	238877170	rs62194507	UBE2F	G	C	G	-0.011278	G	C	-0.011278	3.81997e-09	0.001913	558142	ieu-b-30	white blood cell count
2	238877170	rs62194507	UBE2F	G	C	G	-0.011278	G	C	-0.011278	3.81997e-09	0.001913	562243	ebi-a-GCST90002374	White blood cell count
2	238877170	rs62194507	UBE2F	G	C	G	-0.012447	G	C	-0.012447	1e-09	0.002036	473296	ieu-b-33	eosinophil cell count
2	238877170	rs62194507	UBE2F	G	C	G	-0.012447	G	C	-0.012447	1e-09	0.002036	474237	ebi-a-GCST90002298	Eosinophil counts
2	238877170	rs62194507	UBE2F	G	C	G	-0.0117688	G	C	-0.0117688	6.19998e-10	0.00203336	513859	ebi-a-GCST90028992	White blood cell count (eosinophil)
2	238877170	rs62194507	UBE2F	G	C	G	-0.0120346	G	C	-0.0120346	9.90011e-10	0.00202085	503190	ebi-a-GCST90029003	White blood cell count
2	238877170	rs62194507	UBE2F	G	C	G	-0.0134765	G	C	-0.0134765	4.25236e-10	0.00215815	395949	ebi-a-GCST90013985	Eosinophill count (UKB data field 30150)
2	238877170	rs62194507	UBE2F	G	C	G	-0.0140888	G	C	-0.0140888	9.20026e-11	0.00217451	408112	ebi-a-GCST90002381	Eosinophil counts
2	238877409	rs62194508	UBE2F	C	A	C	-0.0108	C	A	-0.0108	2.172e-10	0.0017	349856	ebi-a-GCST90018953	Eosinophil counts
2	238877409	rs62194508	UBE2F	C	A	C	-0.011337	C	A	-0.011337	3.18002e-09	0.001913	558141	ieu-b-30	white blood cell count
2	238877409	rs62194508	UBE2F	C	A	C	-0.011337	C	A	-0.011337	3.18002e-09	0.001913	562243	ebi-a-GCST90002374	White blood cell count
2	238877409	rs62194508	UBE2F	C	A	C	-0.012417	C	A	-0.012417	1.09999e-09	0.002036	473295	ieu-b-33	eosinophil cell count
2	238877409	rs62194508	UBE2F	C	A	C	-0.012417	C	A	-0.012417	1.09999e-09	0.002036	474237	ebi-a-GCST90002298	Eosinophil counts
2	238877409	rs62194508	UBE2F	C	A	C	-0.0113886	C	A	-0.0113886	1.6e-09	0.00206383	440275	ebi-a-GCST90025987	Eosinophil counts
2	238877409	rs62194508	UBE2F	C	A	C	-0.0117064	C	A	-0.0117064	7.49998e-10	0.00203316	513859	ebi-a-GCST90028992	White blood cell count (eosinophil)
2	238877409	rs62194508	UBE2F	C	A	C	-0.0120333	C	A	-0.0120333	1e-09	0.00202065	503190	ebi-a-GCST90029003	White blood cell count
2	238877409	rs62194508	UBE2F	C	A	C	-0.0134265	C	A	-0.0134265	4.91021e-10	0.00215793	395949	ebi-a-GCST90013985	Eosinophill count (UKB data field 30150)
2	238877409	rs62194508	UBE2F	C	A	C	-0.0140453	C	A	-0.0140453	1e-10	0.00217432	408112	ebi-a-GCST90002381	Eosinophil counts
2	238893362	rs921095	UBE2F	C	T	C	-0.0108	C	T	-0.0108	2.08401e-10	0.0017	349856	ebi-a-GCST90018953	Eosinophil counts
2	238893362	rs921095	UBE2F	C	T	C	-0.011033	C	T	-0.011033	7.01003e-09	0.001904	558142	ieu-b-30	white blood cell count
2	238893362	rs921095	UBE2F	C	T	C	-0.011033	C	T	-0.011033	7.01003e-09	0.001904	562243	ebi-a-GCST90002374	White blood cell count
2	238893362	rs921095	UBE2F	C	T	C	-0.012538	C	T	-0.012538	7.69999e-10	0.002037	473296	ieu-b-33	eosinophil cell count
2	238893362	rs921095	UBE2F	C	T	C	-0.012538	C	T	-0.012538	7.69999e-10	0.002037	474237	ebi-a-GCST90002298	Eosinophil counts
2	238893362	rs921095	UBE2F	C	T	C	-0.0118493	C	T	-0.0118493	5.60003e-10	0.00203415	513859	ebi-a-GCST90028992	White blood cell count (eosinophil)
2	238893362	rs921095	UBE2F	C	T	C	-0.0119966	C	T	-0.0119966	1.09999e-09	0.00202164	503190	ebi-a-GCST90029003	White blood cell count
2	238893362	rs921095	UBE2F	C	T	C	-0.0135776	C	T	-0.0135776	3.1961e-10	0.00215896	395949	ebi-a-GCST90013985	Eosinophill count (UKB data field 30150)
2	238893362	rs921095	UBE2F	C	T	C	-0.0141175	C	T	-0.0141175	8.60003e-11	0.00217524	408112	ebi-a-GCST90002381	Eosinophil counts
2	238895507	rs62194510	UBE2F	A	G	A	-0.011	A	G	-0.011	9.87188e-11	0.0017	349856	ebi-a-GCST90018953	Eosinophil counts
2	238895507	rs62194510	UBE2F	A	G	A	-0.011215	A	G	-0.011215	3.89e-09	0.001903	558140	ieu-b-30	white blood cell count
2	238895507	rs62194510	UBE2F	A	G	A	-0.011215	A	G	-0.011215	3.89e-09	0.001903	562243	ebi-a-GCST90002374	White blood cell count
2	238895507	rs62194510	UBE2F	A	G	A	-0.012639	A	G	-0.012639	5.66005e-10	0.002037	473294	ieu-b-33	eosinophil cell count
2	238895507	rs62194510	UBE2F	A	G	A	-0.012639	A	G	-0.012639	5.66005e-10	0.002037	474237	ebi-a-GCST90002298	Eosinophil counts
2	238895507	rs62194510	UBE2F	A	G	A	-0.0118198	A	G	-0.0118198	5.80003e-10	0.00203433	513859	ebi-a-GCST90028992	White blood cell count (eosinophil)
2	238895507	rs62194510	UBE2F	A	G	A	-0.0121038	A	G	-0.0121038	8e-10	0.00202182	503190	ebi-a-GCST90029003	White blood cell count
2	238895507	rs62194510	UBE2F	A	G	A	-0.0135679	A	G	-0.0135679	3.30354e-10	0.00215918	395949	ebi-a-GCST90013985	Eosinophill count (UKB data field 30150)
2	238895507	rs62194510	UBE2F	A	G	A	-0.0141335	A	G	-0.0141335	8.19974e-11	0.00217546	408112	ebi-a-GCST90002381	Eosinophil counts
2	238907642	rs7563768	UBE2F	C	A	C	-0.0109	C	A	-0.0109	1.69801e-10	0.0017	349856	ebi-a-GCST90018953	Eosinophil counts
2	238907642	rs7563768	UBE2F	C	A	C	-0.010988	C	A	-0.010988	6.94992e-09	0.001896	558143	ieu-b-30	white blood cell count
2	238907642	rs7563768	UBE2F	C	A	C	-0.010988	C	A	-0.010988	6.94992e-09	0.001896	562243	ebi-a-GCST90002374	White blood cell count
2	238907642	rs7563768	UBE2F	C	A	C	-0.012558	C	A	-0.012558	7.19002e-10	0.002037	473297	ieu-b-33	eosinophil cell count
2	238907642	rs7563768	UBE2F	C	A	C	-0.012558	C	A	-0.012558	7.19002e-10	0.002037	474237	ebi-a-GCST90002298	Eosinophil counts
2	238907642	rs7563768	UBE2F	C	A	C	-0.013573	C	A	-0.013573	3.23802e-10	0.00215892	395949	ebi-a-GCST90013985	Eosinophill count (UKB data field 30150)
2	238907642	rs7563768	UBE2F	C	A	C	-0.0118437	C	A	-0.0118437	5.60003e-10	0.00203412	513859	ebi-a-GCST90028992	White blood cell count (eosinophil)
2	238907642	rs7563768	UBE2F	C	A	C	-0.0120058	C	A	-0.0120058	1e-09	0.0020216	503190	ebi-a-GCST90029003	White blood cell count
2	238907642	rs7563768	UBE2F	C	A	C	-0.0141101	C	A	-0.0141101	8.80035e-11	0.00217522	408112	ebi-a-GCST90002381	Eosinophil counts
2	238909269	rs11684788	UBE2F	G	A	G	-0.0108	G	A	-0.0108	2.47201e-10	0.0017	349856	ebi-a-GCST90018953	Eosinophil counts
2	238909269	rs11684788	UBE2F	G	A	G	-0.010982	G	A	-0.010982	6.94001e-09	0.001894	558141	ieu-b-30	white blood cell count
2	238909269	rs11684788	UBE2F	G	A	G	-0.010982	G	A	-0.010982	6.94001e-09	0.001894	562243	ebi-a-GCST90002374	White blood cell count
2	238909269	rs11684788	UBE2F	G	A	G	-0.012557	G	A	-0.012557	7.22005e-10	0.002037	473295	ieu-b-33	eosinophil cell count
2	238909269	rs11684788	UBE2F	G	A	G	-0.012557	G	A	-0.012557	7.22005e-10	0.002037	474237	ebi-a-GCST90002298	Eosinophil counts
2	238909269	rs11684788	UBE2F	G	A	G	-0.0118546	G	A	-0.0118546	5.39995e-10	0.00203408	513859	ebi-a-GCST90028992	White blood cell count (eosinophil)
2	238909269	rs11684788	UBE2F	G	A	G	-0.0119932	G	A	-0.0119932	1.09999e-09	0.00202158	503190	ebi-a-GCST90029003	White blood cell count
2	238909269	rs11684788	UBE2F	G	A	G	-0.0135782	G	A	-0.0135782	3.1864e-10	0.00215889	395949	ebi-a-GCST90013985	Eosinophill count (UKB data field 30150)
2	238909269	rs11684788	UBE2F	G	A	G	-0.0141156	G	A	-0.0141156	8.60003e-11	0.00217519	408112	ebi-a-GCST90002381	Eosinophil counts
2	238910663	rs72977017	UBE2F	C	T	C	-0.0108	C	T	-0.0108	2.47902e-10	0.0017	349856	ebi-a-GCST90018953	Eosinophil counts
2	238910663	rs72977017	UBE2F	C	T	C	-0.010953	C	T	-0.010953	7.70992e-09	0.001895	557051	ieu-b-30	white blood cell count
2	238910663	rs72977017	UBE2F	C	T	C	-0.010953	C	T	-0.010953	7.70992e-09	0.001895	562243	ebi-a-GCST90002374	White blood cell count
2	238910663	rs72977017	UBE2F	C	T	C	-0.012445	C	T	-0.012445	1.06001e-09	0.002039	472208	ieu-b-33	eosinophil cell count
2	238910663	rs72977017	UBE2F	C	T	C	-0.012445	C	T	-0.012445	1.06001e-09	0.002039	474237	ebi-a-GCST90002298	Eosinophil counts
2	238910663	rs72977017	UBE2F	C	T	C	-0.0118415	C	T	-0.0118415	5.60003e-10	0.00203409	513859	ebi-a-GCST90028992	White blood cell count (eosinophil)
2	238910663	rs72977017	UBE2F	C	T	C	-0.0119509	C	T	-0.0119509	1.2e-09	0.00202158	503190	ebi-a-GCST90029003	White blood cell count
2	238910663	rs72977017	UBE2F	C	T	C	-0.0135634	C	T	-0.0135634	3.32989e-10	0.00215889	395949	ebi-a-GCST90013985	Eosinophill count (UKB data field 30150)
2	238910663	rs72977017	UBE2F	C	T	C	-0.0141137	C	T	-0.0141137	8.69961e-11	0.0021752	408112	ebi-a-GCST90002381	Eosinophil counts
2	238912120	rs10929262	UBE2F	C	A	C	-0.0109	C	A	-0.0109	1.88001e-10	0.0017	349856	ebi-a-GCST90018953	Eosinophil counts
2	238912120	rs10929262	UBE2F	C	A	C	-0.011025	C	A	-0.011025	5.87003e-09	0.001893	558141	ieu-b-30	white blood cell count
2	238912120	rs10929262	UBE2F	C	A	C	-0.011025	C	A	-0.011025	5.87003e-09	0.001893	562243	ebi-a-GCST90002374	White blood cell count
2	238912120	rs10929262	UBE2F	C	A	C	-0.012557	C	A	-0.012557	7.17993e-10	0.002036	473295	ieu-b-33	eosinophil cell count
2	238912120	rs10929262	UBE2F	C	A	C	-0.012557	C	A	-0.012557	7.17993e-10	0.002036	474237	ebi-a-GCST90002298	Eosinophil counts
2	238912120	rs10929262	UBE2F	C	A	C	-0.0118446	C	A	-0.0118446	5.49997e-10	0.00203398	513859	ebi-a-GCST90028992	White blood cell count (eosinophil)
2	238912120	rs10929262	UBE2F	C	A	C	-0.0120221	C	A	-0.0120221	9.59997e-10	0.00202147	503190	ebi-a-GCST90029003	White blood cell count
2	238912120	rs10929262	UBE2F	C	A	C	-0.0135622	C	A	-0.0135622	3.33419e-10	0.00215877	395949	ebi-a-GCST90013985	Eosinophill count (UKB data field 30150)
2	238912120	rs10929262	UBE2F	C	A	C	-0.0141167	C	A	-0.0141167	8.60003e-11	0.00217506	408112	ebi-a-GCST90002381	Eosinophil counts
2	238912478	rs59070084	UBE2F	A	G	A	-0.011	A	G	-0.011	1.36301e-10	0.0017	349856	ebi-a-GCST90018953	Eosinophil counts
2	238912478	rs59070084	UBE2F	A	G	A	-0.010951	A	G	-0.010951	7.46999e-09	0.001893	558142	ieu-b-30	white blood cell count
2	238912478	rs59070084	UBE2F	A	G	A	-0.010951	A	G	-0.010951	7.46999e-09	0.001893	562243	ebi-a-GCST90002374	White blood cell count
2	238912478	rs59070084	UBE2F	A	G	A	-0.011933	A	G	-0.011933	1.29999e-09	0.0020217	503190	ebi-a-GCST90029003	White blood cell count
2	238912478	rs59070084	UBE2F	A	G	A	-0.012651	A	G	-0.012651	5.39002e-10	0.002036	473296	ieu-b-33	eosinophil cell count
2	238912478	rs59070084	UBE2F	A	G	A	-0.012651	A	G	-0.012651	5.39002e-10	0.002036	474237	ebi-a-GCST90002298	Eosinophil counts
2	238912478	rs59070084	UBE2F	A	G	A	-0.0118917	A	G	-0.0118917	5e-10	0.00203421	513859	ebi-a-GCST90028992	White blood cell count (eosinophil)
2	238912478	rs59070084	UBE2F	A	G	A	-0.0136143	A	G	-0.0136143	2.86794e-10	0.00215903	395949	ebi-a-GCST90013985	Eosinophill count (UKB data field 30150)
2	238912478	rs59070084	UBE2F	A	G	A	-0.0142153	A	G	-0.0142153	6.4003e-11	0.00217533	408112	ebi-a-GCST90002381	Eosinophil counts
2	238922585	rs7592267	UBE2F	T	G	T	-0.0109	T	G	-0.0109	1.63999e-10	0.0017	349856	ebi-a-GCST90018953	Eosinophil counts
2	238922585	rs7592267	UBE2F	T	G	T	-0.011073	T	G	-0.011073	5.15003e-09	0.001894	558142	ieu-b-30	white blood cell count
2	238922585	rs7592267	UBE2F	T	G	T	-0.011073	T	G	-0.011073	5.15003e-09	0.001894	562243	ebi-a-GCST90002374	White blood cell count
2	238922585	rs7592267	UBE2F	T	G	T	-0.011864	T	G	-0.011864	5.49997e-10	0.0020345	513859	ebi-a-GCST90028992	White blood cell count (eosinophil)
2	238922585	rs7592267	UBE2F	T	G	T	-0.012636	T	G	-0.012636	5.64001e-10	0.002037	473296	ieu-b-33	eosinophil cell count
2	238922585	rs7592267	UBE2F	T	G	T	-0.012636	T	G	-0.012636	5.64001e-10	0.002037	474237	ebi-a-GCST90002298	Eosinophil counts
2	238922585	rs7592267	UBE2F	T	G	T	-0.0120093	T	G	-0.0120093	9.69996e-10	0.002022	503190	ebi-a-GCST90029003	White blood cell count
2	238922585	rs7592267	UBE2F	T	G	T	-0.0135628	T	G	-0.0135628	3.36233e-10	0.00215931	395949	ebi-a-GCST90013985	Eosinophill count (UKB data field 30150)
2	238922585	rs7592267	UBE2F	T	G	T	-0.0141782	T	G	-0.0141782	7.19946e-11	0.00217558	408112	ebi-a-GCST90002381	Eosinophil counts
2	238930632	rs62194543	UBE2F	G	A	G	-0.0107	G	A	-0.0107	3.63304e-10	0.0017	349856	ebi-a-GCST90018953	Eosinophil counts
2	238930632	rs62194543	UBE2F	G	A	G	-0.011066	G	A	-0.011066	5.39995e-09	0.001895	558140	ieu-b-30	white blood cell count
2	238930632	rs62194543	UBE2F	G	A	G	-0.011066	G	A	-0.011066	5.39995e-09	0.001895	562243	ebi-a-GCST90002374	White blood cell count
2	238930632	rs62194543	UBE2F	G	A	G	-0.012543	G	A	-0.012543	7.47997e-10	0.002036	473294	ieu-b-33	eosinophil cell count
2	238930632	rs62194543	UBE2F	G	A	G	-0.012543	G	A	-0.012543	7.47997e-10	0.002036	474237	ebi-a-GCST90002298	Eosinophil counts
2	238930632	rs62194543	UBE2F	G	A	G	-0.0117994	G	A	-0.0117994	6.19998e-10	0.00203436	513859	ebi-a-GCST90028992	White blood cell count (eosinophil)
2	238930632	rs62194543	UBE2F	G	A	G	-0.0120432	G	A	-0.0120432	8.60003e-10	0.00202185	503190	ebi-a-GCST90029003	White blood cell count
2	238930632	rs62194543	UBE2F	G	A	G	-0.0134968	G	A	-0.0134968	4.07746e-10	0.00215914	395949	ebi-a-GCST90013985	Eosinophill count (UKB data field 30150)
2	238930632	rs62194543	UBE2F	G	A	G	-0.0140403	G	A	-0.0140403	1.09999e-10	0.00217546	408112	ebi-a-GCST90002381	Eosinophil counts
2	238932389	rs11678880	UBE2F	A	G	A	-0.0107	A	G	-0.0107	4.63895e-10	0.0017	349856	ebi-a-GCST90018953	Eosinophil counts
2	238932389	rs11678880	UBE2F	A	G	A	-0.011127	A	G	-0.011127	4.45995e-09	0.001895	558138	ieu-b-30	white blood cell count
2	238932389	rs11678880	UBE2F	A	G	A	-0.011127	A	G	-0.011127	4.45995e-09	0.001895	562243	ebi-a-GCST90002374	White blood cell count
2	238932389	rs11678880	UBE2F	A	G	A	-0.012456	A	G	-0.012456	9.78994e-10	0.002036	473292	ieu-b-33	eosinophil cell count
2	238932389	rs11678880	UBE2F	A	G	A	-0.012456	A	G	-0.012456	9.78994e-10	0.002036	474237	ebi-a-GCST90002298	Eosinophil counts
2	238932389	rs11678880	UBE2F	A	G	A	-0.0117551	A	G	-0.0117551	6.29999e-10	0.00203459	513859	ebi-a-GCST90028992	White blood cell count (eosinophil)
2	238932389	rs11678880	UBE2F	A	G	A	-0.0120404	A	G	-0.0120404	8.79995e-10	0.00202207	503190	ebi-a-GCST90029003	White blood cell count
2	238932389	rs11678880	UBE2F	A	G	A	-0.0134816	A	G	-0.0134816	4.28618e-10	0.00215939	395949	ebi-a-GCST90013985	Eosinophill count (UKB data field 30150)
2	238932389	rs11678880	UBE2F	A	G	A	-0.0139459	A	G	-0.0139459	1.5e-10	0.00217578	408112	ebi-a-GCST90002381	Eosinophil counts
2	238939370	rs11679080	UBE2F	T	C	T	-0.0124658	T	C	-0.0124658	6.59994e-09	0.00214941	408112	ebi-a-GCST90002381	Eosinophil counts
3	20093613	rs35659955	KAT2B	G	A	G	-0.0163039	G	A	-0.0163039	4.70002e-12	0.0023584	408112	ebi-a-GCST90002397	Mean spheric corpuscular volume
3	20100490	rs34515517	KAT2B	C	A	C	-0.0159825	C	A	-0.0159825	9.79941e-12	0.00234718	408112	ebi-a-GCST90002397	Mean spheric corpuscular volume
3	20104838	rs13066876	KAT2B	G	C	G	-0.0131465	G	C	-0.0131465	8.10009e-09	0.00220453	535537	ebi-a-GCST90028997	Mean sphered cell volume
3	20104838	rs13066876	KAT2B	G	C	G	-0.0169356	G	C	-0.0169356	4.49987e-13	0.00233915	408112	ebi-a-GCST90002397	Mean spheric corpuscular volume
3	20112824	rs34204839	KAT2B	C	T	C	-0.0159073	C	T	-0.0159073	8.80035e-12	0.00233092	408112	ebi-a-GCST90002397	Mean spheric corpuscular volume
3	20115004	rs17182383	KAT2B	C	T	C	-0.0159355	C	T	-0.0159355	8.19974e-12	0.00233123	408112	ebi-a-GCST90002397	Mean spheric corpuscular volume
3	20116974	rs4858755	KAT2B	G	C	G	-0.0158953	G	C	-0.0158953	9.3994e-12	0.00233214	408112	ebi-a-GCST90002397	Mean spheric corpuscular volume
3	20129611	rs71316246	KAT2B	G	C	G	-0.017696	G	C	-0.017696	1.6e-10	0.00260885	572863	ebi-a-GCST90028995	Mean corpuscular hemoglobin
3	20129611	rs71316246	KAT2B	G	C	G	-0.0175144	G	C	-0.0175144	9.69125e-10	0.00286445	396624	ebi-a-GCST90013979	Mean corpuscular volume (UKB data field 30040)
3	20129611	rs71316246	KAT2B	G	C	G	-0.0178816	G	C	-0.0178816	7.69999e-10	0.00290747	408112	ebi-a-GCST90002397	Mean spheric corpuscular volume
3	20129611	rs71316246	KAT2B	G	C	G	-0.0190279	G	C	-0.0190279	6.09958e-11	0.00273716	535537	ebi-a-GCST90028997	Mean sphered cell volume
3	20132259	rs34572705	KAT2B	G	C	G	-0.0175067	G	C	-0.0175067	1.00092e-09	0.0028656	396624	ebi-a-GCST90013979	Mean corpuscular volume (UKB data field 30040)
3	20132259	rs34572705	KAT2B	G	C	G	-0.0177496	G	C	-0.0177496	1.5e-10	0.00260986	572863	ebi-a-GCST90028995	Mean corpuscular hemoglobin
3	20132259	rs34572705	KAT2B	G	C	G	-0.0177803	G	C	-0.0177803	9.80009e-10	0.00290876	408112	ebi-a-GCST90002397	Mean spheric corpuscular volume
3	20132259	rs34572705	KAT2B	G	C	G	-0.0188944	G	C	-0.0188944	8.49963e-11	0.00273824	535537	ebi-a-GCST90028997	Mean sphered cell volume
3	20136029	rs35645247	KAT2B	C	G	C	-0.0173939	C	G	-0.0173939	1.0459e-09	0.0028504	396624	ebi-a-GCST90013979	Mean corpuscular volume (UKB data field 30040)
3	20136029	rs35645247	KAT2B	C	G	C	-0.0176537	C	G	-0.0176537	1.7e-10	0.00259604	572863	ebi-a-GCST90028995	Mean corpuscular hemoglobin
3	20136029	rs35645247	KAT2B	C	G	C	-0.0178295	C	G	-0.0178295	7.19996e-10	0.0028933	408112	ebi-a-GCST90002397	Mean spheric corpuscular volume
3	20136029	rs35645247	KAT2B	C	G	C	-0.0186138	C	G	-0.0186138	1.6e-10	0.00272381	535537	ebi-a-GCST90028997	Mean sphered cell volume
3	20138732	rs71316248	KAT2B	A	G	A	-0.0173821	A	G	-0.0173821	1.0305e-09	0.00284738	396624	ebi-a-GCST90013979	Mean corpuscular volume (UKB data field 30040)
3	20138732	rs71316248	KAT2B	A	G	A	-0.0175906	A	G	-0.0175906	1.89998e-10	0.00259326	572863	ebi-a-GCST90028995	Mean corpuscular hemoglobin
3	20138732	rs71316248	KAT2B	A	G	A	-0.0177964	A	G	-0.0177964	7.39997e-10	0.00289025	408112	ebi-a-GCST90002397	Mean spheric corpuscular volume
3	20138732	rs71316248	KAT2B	A	G	A	-0.0185649	A	G	-0.0185649	1.7e-10	0.00272091	535537	ebi-a-GCST90028997	Mean sphered cell volume
3	20139967	rs4858763	KAT2B	C	G	C	-0.0173776	C	G	-0.0173776	1.04184e-09	0.00284744	396624	ebi-a-GCST90013979	Mean corpuscular volume (UKB data field 30040)
3	20139967	rs4858763	KAT2B	C	G	C	-0.0175868	C	G	-0.0175868	1.89998e-10	0.00259332	572863	ebi-a-GCST90028995	Mean corpuscular hemoglobin
3	20139967	rs4858763	KAT2B	C	G	C	-0.0178237	C	G	-0.0178237	7.00003e-10	0.00289031	408112	ebi-a-GCST90002397	Mean spheric corpuscular volume
3	20139967	rs4858763	KAT2B	C	G	C	-0.0185954	C	G	-0.0185954	1.5e-10	0.00272098	535537	ebi-a-GCST90028997	Mean sphered cell volume
3	20141356	rs35424474	KAT2B	T	C	T	-0.0173744	T	C	-0.0173744	1.05194e-09	0.00284765	396624	ebi-a-GCST90013979	Mean corpuscular volume (UKB data field 30040)
3	20141356	rs35424474	KAT2B	T	C	T	-0.0175778	T	C	-0.0175778	1.89998e-10	0.0025935	572863	ebi-a-GCST90028995	Mean corpuscular hemoglobin
3	20141356	rs35424474	KAT2B	T	C	T	-0.0176184	T	C	-0.0176184	4.70002e-10	0.00268743	437736	ebi-a-GCST90025976	Mean sphered cell volume
3	20141356	rs35424474	KAT2B	T	C	T	-0.0177699	T	C	-0.0177699	1.79999e-10	0.00262494	444035	ebi-a-GCST90025963	Mean corpuscular volume
3	20141356	rs35424474	KAT2B	T	C	T	-0.0178135	T	C	-0.0178135	7.19996e-10	0.00289052	408112	ebi-a-GCST90002397	Mean spheric corpuscular volume
3	20141356	rs35424474	KAT2B	T	C	T	-0.0185812	T	C	-0.0185812	1.6e-10	0.00272118	535537	ebi-a-GCST90028997	Mean sphered cell volume
3	20164642	rs35841175	KAT2B	T	C	T	-0.0166416	T	C	-0.0166416	5.77923e-09	0.00285789	396624	ebi-a-GCST90013979	Mean corpuscular volume (UKB data field 30040)
3	20164642	rs35841175	KAT2B	T	C	T	-0.0166509	T	C	-0.0166509	9.49992e-09	0.00290093	408112	ebi-a-GCST90002397	Mean spheric corpuscular volume
3	20164642	rs35841175	KAT2B	T	C	T	-0.0171919	T	C	-0.0171919	4.70002e-10	0.00260307	572863	ebi-a-GCST90028995	Mean corpuscular hemoglobin
3	20164642	rs35841175	KAT2B	T	C	T	-0.0176505	T	C	-0.0176505	1.7e-09	0.0027313	535537	ebi-a-GCST90028997	Mean sphered cell volume
3	20167830	rs13097409	KAT2B	G	A	G	-0.0167131	G	A	-0.0167131	8.40001e-09	0.00290192	408112	ebi-a-GCST90002397	Mean spheric corpuscular volume
3	20167830	rs13097409	KAT2B	G	A	G	-0.0167597	G	A	-0.0167597	4.54925e-09	0.00285861	396624	ebi-a-GCST90013979	Mean corpuscular volume (UKB data field 30040)
3	20167830	rs13097409	KAT2B	G	A	G	-0.0172093	G	A	-0.0172093	4.60002e-10	0.00260382	572863	ebi-a-GCST90028995	Mean corpuscular hemoglobin
3	20167830	rs13097409	KAT2B	G	A	G	-0.0178168	G	A	-0.0178168	1.40001e-09	0.00273211	535537	ebi-a-GCST90028997	Mean sphered cell volume
3	20168875	rs41285061	KAT2B	G	C	G	-0.0166648	G	C	-0.0166648	5.67388e-09	0.00286037	396624	ebi-a-GCST90013979	Mean corpuscular volume (UKB data field 30040)
3	20168875	rs41285061	KAT2B	G	C	G	-0.0167378	G	C	-0.0167378	8.19993e-09	0.00290386	408112	ebi-a-GCST90002397	Mean spheric corpuscular volume
3	20168875	rs41285061	KAT2B	G	C	G	-0.0168045	G	C	-0.0168045	2.19999e-09	0.00268031	437736	ebi-a-GCST90025976	Mean sphered cell volume
3	20168875	rs41285061	KAT2B	G	C	G	-0.0170956	G	C	-0.0170956	5.99998e-10	0.00260561	572863	ebi-a-GCST90028995	Mean corpuscular hemoglobin
3	20168875	rs41285061	KAT2B	G	C	G	-0.0175671	G	C	-0.0175671	4e-10	0.00261765	444035	ebi-a-GCST90025963	Mean corpuscular volume
3	20168875	rs41285061	KAT2B	G	C	G	-0.0177861	G	C	-0.0177861	1.6e-09	0.00273393	535537	ebi-a-GCST90028997	Mean sphered cell volume
3	20174369	rs4858768	MIR3135A	G	A	G	-0.016756	G	A	-0.016756	4.69829e-09	0.00286059	396624	ebi-a-GCST90013979	Mean corpuscular volume (UKB data field 30040)
3	20174369	rs4858768	MIR3135A	G	A	G	-0.0168609	G	A	-0.0168609	6.4e-09	0.00290417	408112	ebi-a-GCST90002397	Mean spheric corpuscular volume
3	20174369	rs4858768	MIR3135A	G	A	G	-0.0172087	G	A	-0.0172087	4.70002e-10	0.00260582	572863	ebi-a-GCST90028995	Mean corpuscular hemoglobin
3	20174369	rs4858768	MIR3135A	G	A	G	-0.0178682	G	A	-0.0178682	1.40001e-09	0.00273413	535537	ebi-a-GCST90028997	Mean sphered cell volume
3	153992586	rs2596630	DHX36	G	A	A	0.064	A	G	-0.064	1.10408e-14	0.0083	296525	ebi-a-GCST005194	Coronary artery disease
3	153992586	rs2596630	DHX36	G	A	A	0.0152474	A	G	-0.0152474	4.55722e-10	0.002446	389404	ebi-a-GCST90014015	Urate levels (UKB data field 30880)
3	153992586	rs2596630	DHX36	G	A	A	0.0155102	A	G	-0.0155102	1.9246e-09	0.0025833	389834	ebi-a-GCST90014003	Cystatin C levels (UKB data field 30720)
3	153992586	rs2596630	DHX36	G	A	A	0.0645417	A	G	-0.0645417	5.00035e-11	0.00982089	547261	ebi-a-GCST005195	Coronary artery disease
3	153992586	rs2596630	DHX36	G	A	A	-0.018121	A	G	0.018121	2.60016e-11	0.00271716	NA	ieu-b-107	apolipoprotein A-I
3	153992586	rs2596630	DHX36	G	A	A	-0.0158634	A	G	0.0158634	1.79999e-09	0.00263898	NA	ieu-b-109	HDL cholesterol
3	153992586	rs2596630	DHX36	G	A	A	-0.0163721	A	G	0.0163721	4.03497e-09	0.00278307	355859	ebi-a-GCST90013993	Apolipoprotein A levels (UKB data field 30630)
3	154004009	rs2666192	DHX36	C	T	T	0.0637	T	C	-0.0637	1.32099e-14	0.0083	296525	ebi-a-GCST005194	Coronary artery disease
3	154004009	rs2666192	DHX36	C	T	T	0.0152666	T	C	-0.0152666	4.32693e-10	0.00244588	389404	ebi-a-GCST90014015	Urate levels (UKB data field 30880)
3	154004009	rs2666192	DHX36	C	T	T	0.0155362	T	C	-0.0155362	1.80559e-09	0.00258318	389834	ebi-a-GCST90014003	Cystatin C levels (UKB data field 30720)
3	154004009	rs2666192	DHX36	C	T	T	0.0647053	T	C	-0.0647053	4.40048e-11	0.00981967	547261	ebi-a-GCST005195	Coronary artery disease
3	154004009	rs2666192	DHX36	C	T	T	-0.0158403	T	C	0.0158403	1.89998e-09	0.00263884	NA	ieu-b-109	HDL cholesterol
3	154004009	rs2666192	DHX36	C	T	T	-0.0163627	T	C	0.0163627	4.11112e-09	0.00278294	355859	ebi-a-GCST90013993	Apolipoprotein A levels (UKB data field 30630)
3	154004009	rs2666192	DHX36	C	T	T	-0.0181026	T	C	0.0181026	2.70023e-11	0.00271702	NA	ieu-b-107	apolipoprotein A-I
3	154009933	rs355760	DHX36	C	T	T	0.0643	T	C	-0.0643	7.81448e-15	0.0083	296525	ebi-a-GCST005194	Coronary artery disease
3	154009933	rs355760	DHX36	C	T	T	0.0153862	T	C	-0.0153862	3.12428e-10	0.00244517	389404	ebi-a-GCST90014015	Urate levels (UKB data field 30880)
3	154009933	rs355760	DHX36	C	T	T	0.0156002	T	C	-0.0156002	1.53239e-09	0.00258243	389834	ebi-a-GCST90014003	Cystatin C levels (UKB data field 30720)
3	154009933	rs355760	DHX36	C	T	T	0.0649076	T	C	-0.0649076	3.80014e-11	0.00981713	547261	ebi-a-GCST005195	Coronary artery disease
3	154009933	rs355760	DHX36	C	T	T	-0.0157209	T	C	0.0157209	2.5e-09	0.00263808	NA	ieu-b-109	HDL cholesterol
3	154009933	rs355760	DHX36	C	T	T	-0.0162319	T	C	0.0162319	5.39772e-09	0.00278208	355859	ebi-a-GCST90013993	Apolipoprotein A levels (UKB data field 30630)
3	154009933	rs355760	DHX36	C	T	T	-0.0179935	T	C	0.0179935	3.50026e-11	0.00271623	NA	ieu-b-107	apolipoprotein A-I
3	154036196	rs355774	DHX36	G	A	A	0.0644	A	G	-0.0644	7.03072e-15	0.0083	296525	ebi-a-GCST005194	Coronary artery disease
3	154036196	rs355774	DHX36	G	A	A	0.0153106	A	G	-0.0153106	3.7512e-10	0.0024442	389404	ebi-a-GCST90014015	Urate levels (UKB data field 30880)
3	154036196	rs355774	DHX36	G	A	A	0.0155679	A	G	-0.0155679	1.63151e-09	0.00258141	389834	ebi-a-GCST90014003	Cystatin C levels (UKB data field 30720)
3	154036196	rs355774	DHX36	G	A	A	0.0649781	A	G	-0.0649781	3.59998e-11	0.00981294	547261	ebi-a-GCST005195	Coronary artery disease
3	154036196	rs355774	DHX36	G	A	A	-0.0159047	A	G	0.0159047	1.6e-09	0.00263703	NA	ieu-b-109	HDL cholesterol
3	154036196	rs355774	DHX36	G	A	A	-0.0163933	A	G	0.0163933	3.75535e-09	0.00278106	355859	ebi-a-GCST90013993	Apolipoprotein A levels (UKB data field 30630)
3	154036196	rs355774	DHX36	G	A	A	-0.0181138	A	G	0.0181138	2.49977e-11	0.00271517	NA	ieu-b-107	apolipoprotein A-I
3	154036657	rs355773	DHX36	T	C	C	0.0644	C	T	-0.0644	6.91672e-15	0.0083	296525	ebi-a-GCST005194	Coronary artery disease
3	154036657	rs355773	DHX36	T	C	C	0.0153116	C	T	-0.0153116	3.74136e-10	0.0024442	389404	ebi-a-GCST90014015	Urate levels (UKB data field 30880)
3	154036657	rs355773	DHX36	T	C	C	0.0155684	C	T	-0.0155684	1.6299e-09	0.00258141	389834	ebi-a-GCST90014003	Cystatin C levels (UKB data field 30720)
3	154036657	rs355773	DHX36	T	C	C	0.0649777	C	T	-0.0649777	3.59998e-11	0.00981294	547261	ebi-a-GCST005195	Coronary artery disease
3	154036657	rs355773	DHX36	T	C	C	-0.0158954	C	T	0.0158954	1.7e-09	0.00263703	NA	ieu-b-109	HDL cholesterol
3	154036657	rs355773	DHX36	T	C	C	-0.0163943	C	T	0.0163943	3.74705e-09	0.00278106	355859	ebi-a-GCST90013993	Apolipoprotein A levels (UKB data field 30630)
3	154036657	rs355773	DHX36	T	C	C	-0.0181067	C	T	0.0181067	2.60016e-11	0.00271516	NA	ieu-b-107	apolipoprotein A-I
3	154040273	rs355770	DHX36	A	G	G	0.0643	G	A	-0.0643	8.07607e-15	0.0083	296525	ebi-a-GCST005194	Coronary artery disease
3	154040273	rs355770	DHX36	A	G	G	0.0152623	G	A	-0.0152623	4.21415e-10	0.00244358	389404	ebi-a-GCST90014015	Urate levels (UKB data field 30880)
3	154040273	rs355770	DHX36	A	G	G	0.0154762	G	A	-0.0154762	2.01243e-09	0.00258075	389834	ebi-a-GCST90014003	Cystatin C levels (UKB data field 30720)
3	154040273	rs355770	DHX36	A	G	G	0.0163713	G	A	-0.0163713	2.99999e-10	0.00266727	437846	ebi-a-GCST90025945	Cystatin C levels
3	154040273	rs355770	DHX36	A	G	G	0.0647956	G	A	-0.0647956	4.00037e-11	0.00981145	547261	ebi-a-GCST005195	Coronary artery disease
3	154040273	rs355770	DHX36	A	G	G	-0.0160081	G	A	0.0160081	1.29999e-09	0.00263646	NA	ieu-b-109	HDL cholesterol
3	154040273	rs355770	DHX36	A	G	G	-0.0165003	G	A	0.0165003	2.94571e-09	0.00278036	355859	ebi-a-GCST90013993	Apolipoprotein A levels (UKB data field 30630)
3	154040273	rs355770	DHX36	A	G	G	-0.0169197	G	A	0.0169197	9.70063e-11	0.00283329	398508	ebi-a-GCST90025955	Apolipoprotein A1 levels
3	154040273	rs355770	DHX36	A	G	G	-0.0182702	G	A	0.0182702	1.69981e-11	0.00271458	NA	ieu-b-107	apolipoprotein A-I
5	405576	rs55929184	ENSG00000214278	A	G	A	0.011712	A	G	0.011712	2e-09	0.001951	545203	ebi-a-GCST90002363	Red blood cell count
5	405576	rs55929184	ENSG00000214278	A	G	A	0.013542	A	G	0.013542	5.79029e-12	0.001965	563946	ebi-a-GCST90002310	Hemoglobin concentration
5	405576	rs55929184	ENSG00000214278	A	G	A	0.013806	A	G	0.013806	7.39997e-10	0.00224225	408112	ebi-a-GCST90002384	Hemoglobin
5	405576	rs55929184	ENSG00000214278	A	G	A	0.014519	A	G	0.014519	1.69005e-13	0.001968	562259	ebi-a-GCST90002304	Hematocrit
5	405576	rs55929184	ENSG00000214278	A	G	A	0.0121218	A	G	0.0121218	2e-09	0.00202802	526540	ebi-a-GCST90029002	Red blood cell count
5	405576	rs55929184	ENSG00000214278	A	G	A	0.0147382	A	G	0.0147382	5.10035e-11	0.00224377	408112	ebi-a-GCST90002383	Hematocrit
5	408529	rs11742006	ENSG00000214278	T	C	T	0.01178	T	C	0.01178	1.41e-09	0.001944	545203	ebi-a-GCST90002363	Red blood cell count
5	408529	rs11742006	ENSG00000214278	T	C	T	0.013617	T	C	0.013617	3.69999e-12	0.001958	563946	ebi-a-GCST90002310	Hemoglobin concentration
5	408529	rs11742006	ENSG00000214278	T	C	T	0.014657	T	C	0.014657	8.07049e-14	0.001961	562259	ebi-a-GCST90002304	Hematocrit
5	408529	rs11742006	ENSG00000214278	T	C	T	0.0122459	T	C	0.0122459	1.5e-09	0.00202298	526540	ebi-a-GCST90029002	Red blood cell count
5	408529	rs11742006	ENSG00000214278	T	C	T	0.0140029	T	C	0.0140029	3.79997e-10	0.00223682	408112	ebi-a-GCST90002384	Hemoglobin
5	408529	rs11742006	ENSG00000214278	T	C	T	0.0150158	T	C	0.0150158	1.99986e-11	0.00223835	408112	ebi-a-GCST90002383	Hematocrit
5	410943	rs11745246	AHRR	G	A	G	0.01377	G	A	0.01377	2.22998e-12	0.00196	563946	ebi-a-GCST90002310	Hemoglobin concentration
5	410943	rs11745246	AHRR	G	A	G	0.011849	G	A	0.011849	1.17999e-09	0.001946	545203	ebi-a-GCST90002363	Red blood cell count
5	410943	rs11745246	AHRR	G	A	G	0.014832	G	A	0.014832	4.3401e-14	0.001963	562259	ebi-a-GCST90002304	Hematocrit
5	410943	rs11745246	AHRR	G	A	G	0.0124012	G	A	0.0124012	9.90011e-10	0.00202454	526540	ebi-a-GCST90029002	Red blood cell count
5	410943	rs11745246	AHRR	G	A	G	0.0141341	G	A	0.0141341	2.69998e-10	0.00223854	408112	ebi-a-GCST90002384	Hemoglobin
5	410943	rs11745246	AHRR	G	A	G	0.0152155	G	A	0.0152155	1.10002e-11	0.00224008	408112	ebi-a-GCST90002383	Hematocrit
5	411361	rs17562461	AHRR	A	G	A	0.012188	A	G	0.012188	4.21998e-10	0.00195	545203	ebi-a-GCST90002363	Red blood cell count
5	411361	rs17562461	AHRR	A	G	A	0.014211	A	G	0.014211	2.19999e-10	0.00223893	408112	ebi-a-GCST90002384	Hemoglobin
5	411361	rs17562461	AHRR	A	G	A	0.014498	A	G	0.014498	8.66962e-14	0.001942	563946	ebi-a-GCST90002310	Hemoglobin concentration
5	411361	rs17562461	AHRR	A	G	A	0.015508	A	G	0.015508	1.6099e-15	0.001945	562259	ebi-a-GCST90002304	Hematocrit
5	411361	rs17562461	AHRR	A	G	A	0.0125131	A	G	0.0125131	7.19996e-10	0.00202491	526540	ebi-a-GCST90029002	Red blood cell count
5	411361	rs17562461	AHRR	A	G	A	0.0152962	A	G	0.0152962	8.69961e-12	0.00224046	408112	ebi-a-GCST90002383	Hematocrit
5	412112	rs11744936	AHRR	T	C	T	0.01388	T	C	0.01388	1.53003e-12	0.001961	563946	ebi-a-GCST90002310	Hemoglobin concentration
5	412112	rs11744936	AHRR	T	C	T	0.011953	T	C	0.011953	8.55008e-10	0.001947	545203	ebi-a-GCST90002363	Red blood cell count
5	412112	rs11744936	AHRR	T	C	T	0.014918	T	C	0.014918	3.1703e-14	0.001964	562259	ebi-a-GCST90002304	Hematocrit
5	412112	rs11744936	AHRR	T	C	T	0.0124418	T	C	0.0124418	8.19993e-10	0.00202507	526540	ebi-a-GCST90029002	Red blood cell count
5	412112	rs11744936	AHRR	T	C	T	0.0142225	T	C	0.0142225	2.1e-10	0.00223912	408112	ebi-a-GCST90002384	Hemoglobin
5	412112	rs11744936	AHRR	T	C	T	0.0152648	T	C	0.0152648	9.60064e-12	0.00224066	408112	ebi-a-GCST90002383	Hematocrit
5	413591	rs11744075	AHRR	A	G	A	0.011743	A	G	0.011743	1.71002e-09	0.001948	545203	ebi-a-GCST90002363	Red blood cell count
5	413591	rs11744075	AHRR	A	G	A	0.013668	A	G	0.013668	3.44033e-12	0.001963	563946	ebi-a-GCST90002310	Hemoglobin concentration
5	413591	rs11744075	AHRR	A	G	A	0.014781	A	G	0.014781	5.68984e-14	0.001965	562259	ebi-a-GCST90002304	Hematocrit
5	413591	rs11744075	AHRR	A	G	A	0.015098	A	G	0.015098	1.50003e-11	0.00223728	408112	ebi-a-GCST90002383	Hematocrit
5	413591	rs11744075	AHRR	A	G	A	0.0119569	A	G	0.0119569	2.80001e-09	0.00202179	526540	ebi-a-GCST90029002	Red blood cell count
5	413591	rs11744075	AHRR	A	G	A	0.0131265	A	G	0.0131265	2.70023e-11	0.00206019	445305	ebi-a-GCST90025964	Red blood cell count
5	413591	rs11744075	AHRR	A	G	A	0.0140898	A	G	0.0140898	2.90001e-10	0.00223575	408112	ebi-a-GCST90002384	Hemoglobin
5	413591	rs11744075	AHRR	A	G	A	0.0150274	A	G	0.0150274	1.29987e-13	0.00213275	445373	ebi-a-GCST90025969	Hemoglobin levels
5	416118	rs56279338	AHRR	A	G	A	0.01648	A	G	0.01648	7.73927e-17	0.001976	563946	ebi-a-GCST90002310	Hemoglobin concentration
5	416118	rs56279338	AHRR	A	G	A	0.015211	A	G	0.015211	9.13903e-15	0.001961	545203	ebi-a-GCST90002363	Red blood cell count
5	416118	rs56279338	AHRR	A	G	A	0.017245	A	G	0.017245	1.59993e-14	0.00224663	408112	ebi-a-GCST90002384	Hemoglobin
5	416118	rs56279338	AHRR	A	G	A	0.018391	A	G	0.018391	1.54989e-20	0.001978	562259	ebi-a-GCST90002304	Hematocrit
5	416118	rs56279338	AHRR	A	G	A	0.0118542	A	G	0.0118542	3.77485e-11	0.00179266	396624	ebi-a-GCST90013978	Haemoglobin concentration (UKB data field 30020)
5	416118	rs56279338	AHRR	A	G	A	0.0121957	A	G	0.0121957	9.35837e-11	0.00188294	396625	ebi-a-GCST90013977	Red blood cell erythrocyte count (UKB data field 30010)
5	416118	rs56279338	AHRR	A	G	A	0.0161709	A	G	0.0161709	1.20005e-15	0.00203193	526540	ebi-a-GCST90029002	Red blood cell count
5	416118	rs56279338	AHRR	A	G	A	0.0166273	A	G	0.0166273	5.40008e-14	0.00221068	408112	ebi-a-GCST90002403	Red blood cell count
5	416118	rs56279338	AHRR	A	G	A	0.0193159	A	G	0.0193159	8.60003e-18	0.00224822	408112	ebi-a-GCST90002383	Hematocrit
5	416672	rs72711365	AHRR	A	G	A	0.0184	A	G	0.0184	1.50003e-20	0.001979	562259	ebi-a-GCST90002304	Hematocrit
5	416672	rs72711365	AHRR	A	G	A	0.015264	A	G	0.015264	7.45933e-15	0.001961	545203	ebi-a-GCST90002363	Red blood cell count
5	416672	rs72711365	AHRR	A	G	A	0.016504	A	G	0.016504	7.06968e-17	0.001976	563946	ebi-a-GCST90002310	Hemoglobin concentration
5	416672	rs72711365	AHRR	A	G	A	0.0118619	A	G	0.0118619	3.66269e-11	0.00179261	396624	ebi-a-GCST90013978	Haemoglobin concentration (UKB data field 30020)
5	416672	rs72711365	AHRR	A	G	A	0.0122083	A	G	0.0122083	8.94335e-11	0.00188289	396625	ebi-a-GCST90013977	Red blood cell erythrocyte count (UKB data field 30010)
5	416672	rs72711365	AHRR	A	G	A	0.0162129	A	G	0.0162129	1.10002e-15	0.00203189	526540	ebi-a-GCST90029002	Red blood cell count
5	416672	rs72711365	AHRR	A	G	A	0.0166812	A	G	0.0166812	4.49987e-14	0.00221061	408112	ebi-a-GCST90002403	Red blood cell count
5	416672	rs72711365	AHRR	A	G	A	0.0172701	A	G	0.0172701	1.50003e-14	0.00224657	408112	ebi-a-GCST90002384	Hemoglobin
5	416672	rs72711365	AHRR	A	G	A	0.0193081	A	G	0.0193081	8.80035e-18	0.00224815	408112	ebi-a-GCST90002383	Hematocrit
5	418093	rs72711366	AHRR	G	A	G	0.020822	G	A	0.020822	5.75043e-15	0.002664	545203	ebi-a-GCST90002363	Red blood cell count
5	418093	rs72711366	AHRR	G	A	G	0.023053	G	A	0.023053	4.58987e-18	0.002659	562259	ebi-a-GCST90002304	Hematocrit
5	418093	rs72711366	AHRR	G	A	G	0.023953	G	A	0.023953	4.19952e-15	0.00305125	408112	ebi-a-GCST90002384	Hemoglobin
5	418093	rs72711366	AHRR	G	A	G	0.024082	G	A	0.024082	1.26009e-19	0.002655	563946	ebi-a-GCST90002310	Hemoglobin concentration
5	418093	rs72711366	AHRR	G	A	G	0.0145998	G	A	0.0145998	1.96485e-09	0.00243302	396624	ebi-a-GCST90013978	Haemoglobin concentration (UKB data field 30020)
5	418093	rs72711366	AHRR	G	A	G	0.0153615	G	A	0.0153615	1.84344e-09	0.00255556	396625	ebi-a-GCST90013977	Red blood cell erythrocyte count (UKB data field 30010)
5	418093	rs72711366	AHRR	G	A	G	0.0198998	G	A	0.0198998	3.59998e-13	0.00276033	526540	ebi-a-GCST90029002	Red blood cell count
5	418093	rs72711366	AHRR	G	A	G	0.0230301	G	A	0.0230301	1.69981e-14	0.00300249	408112	ebi-a-GCST90002403	Red blood cell count
5	418093	rs72711366	AHRR	G	A	G	0.0236293	G	A	0.0236293	1e-14	0.00305355	408112	ebi-a-GCST90002383	Hematocrit
5	418494	rs72711367	AHRR	G	A	G	0.01519	G	A	0.01519	9.77913e-15	0.00196	545203	ebi-a-GCST90002363	Red blood cell count
5	418494	rs72711367	AHRR	G	A	G	0.016429	G	A	0.016429	9.47109e-17	0.001975	563946	ebi-a-GCST90002310	Hemoglobin concentration
5	418494	rs72711367	AHRR	G	A	G	0.018337	G	A	0.018337	1.9602e-20	0.001978	562259	ebi-a-GCST90002304	Hematocrit
5	418494	rs72711367	AHRR	G	A	G	0.0117174	G	A	0.0117174	6.15177e-11	0.00179166	396624	ebi-a-GCST90013978	Haemoglobin concentration (UKB data field 30020)
5	418494	rs72711367	AHRR	G	A	G	0.0121248	G	A	0.0121248	1.17206e-10	0.00188189	396625	ebi-a-GCST90013977	Red blood cell erythrocyte count (UKB data field 30010)
5	418494	rs72711367	AHRR	G	A	G	0.0161132	G	A	0.0161132	1.50003e-15	0.00203082	526540	ebi-a-GCST90029002	Red blood cell count
5	418494	rs72711367	AHRR	G	A	G	0.0165704	G	A	0.0165704	6.4003e-14	0.0022095	408112	ebi-a-GCST90002403	Red blood cell count
5	418494	rs72711367	AHRR	G	A	G	0.0171414	G	A	0.0171414	2.29985e-14	0.00224542	408112	ebi-a-GCST90002384	Hemoglobin
5	418494	rs72711367	AHRR	G	A	G	0.0192136	G	A	0.0192136	1.20005e-17	0.00224701	408112	ebi-a-GCST90002383	Hematocrit
5	421193	rs67898037	AHRR	C	G	C	0.012452	C	G	0.012452	1.13e-10	0.001929	545203	ebi-a-GCST90002363	Red blood cell count
5	421193	rs67898037	AHRR	C	G	C	0.013584	C	G	0.013584	2.94985e-12	0.001945	563946	ebi-a-GCST90002310	Hemoglobin concentration
5	421193	rs67898037	AHRR	C	G	C	0.015935	C	G	0.015935	2.91005e-16	0.001947	562259	ebi-a-GCST90002304	Hematocrit
5	421193	rs67898037	AHRR	C	G	C	0.0121225	C	G	0.0121225	1.29999e-09	0.00198614	526540	ebi-a-GCST90029002	Red blood cell count
5	421193	rs67898037	AHRR	C	G	C	0.0128579	C	G	0.0128579	2.69998e-09	0.00216125	408112	ebi-a-GCST90002403	Red blood cell count
5	421193	rs67898037	AHRR	C	G	C	0.0129693	C	G	0.0129693	3.50002e-09	0.00219643	408112	ebi-a-GCST90002384	Hemoglobin
5	421193	rs67898037	AHRR	C	G	C	0.0152024	C	G	0.0152024	4.60045e-12	0.00219798	408112	ebi-a-GCST90002383	Hematocrit
5	421403	rs11741946	AHRR	A	G	A	0.0123	A	G	0.0123	7.29122e-11	0.00188809	396625	ebi-a-GCST90013977	Red blood cell erythrocyte count (UKB data field 30010)
5	421403	rs11741946	AHRR	A	G	A	0.015328	A	G	0.015328	7.25939e-15	0.001969	545203	ebi-a-GCST90002363	Red blood cell count
5	421403	rs11741946	AHRR	A	G	A	0.016439	A	G	0.016439	1.22011e-16	0.001984	563946	ebi-a-GCST90002310	Hemoglobin concentration
5	421403	rs11741946	AHRR	A	G	A	0.016869	A	G	0.016869	2.70023e-14	0.00221676	408112	ebi-a-GCST90002403	Red blood cell count
5	421403	rs11741946	AHRR	A	G	A	0.018404	A	G	0.018404	2.06016e-20	0.001986	562259	ebi-a-GCST90002304	Hematocrit
5	421403	rs11741946	AHRR	A	G	A	0.0115466	A	G	0.0115466	1.33208e-10	0.00179756	396624	ebi-a-GCST90013978	Haemoglobin concentration (UKB data field 30020)
5	421403	rs11741946	AHRR	A	G	A	0.0164049	A	G	0.0164049	6.89922e-16	0.00203748	526540	ebi-a-GCST90029002	Red blood cell count
5	421403	rs11741946	AHRR	A	G	A	0.0171294	A	G	0.0171294	2.90001e-14	0.00225281	408112	ebi-a-GCST90002384	Hemoglobin
5	421403	rs11741946	AHRR	A	G	A	0.0192011	A	G	0.0192011	1.59993e-17	0.0022544	408112	ebi-a-GCST90002383	Hematocrit
5	421426	rs11745813	AHRR	C	A	C	0.021137	C	A	0.021137	3.55959e-15	0.002684	545203	ebi-a-GCST90002363	Red blood cell count
5	421426	rs11745813	AHRR	C	A	C	0.023506	C	A	0.023506	4.26973e-18	0.002709	562259	ebi-a-GCST90002304	Hematocrit
5	421426	rs11745813	AHRR	C	A	C	0.024366	C	A	0.024366	2.18978e-19	0.002704	563946	ebi-a-GCST90002310	Hemoglobin concentration
5	421426	rs11745813	AHRR	C	A	C	0.0146537	C	A	0.0146537	2.02638e-09	0.00244404	396624	ebi-a-GCST90013978	Haemoglobin concentration (UKB data field 30020)
5	421426	rs11745813	AHRR	C	A	C	0.0155166	C	A	0.0155166	1.50051e-09	0.00256714	396625	ebi-a-GCST90013977	Red blood cell erythrocyte count (UKB data field 30010)
5	421426	rs11745813	AHRR	C	A	C	0.0200208	C	A	0.0200208	3.90032e-13	0.00277263	526540	ebi-a-GCST90029002	Red blood cell count
5	421426	rs11745813	AHRR	C	A	C	0.0232368	C	A	0.0232368	1.29987e-14	0.00301599	408112	ebi-a-GCST90002403	Red blood cell count
5	421426	rs11745813	AHRR	C	A	C	0.0237199	C	A	0.0237199	1e-14	0.00306727	408112	ebi-a-GCST90002383	Hematocrit
5	421426	rs11745813	AHRR	C	A	C	0.0240603	C	A	0.0240603	4.19952e-15	0.00306496	408112	ebi-a-GCST90002384	Hemoglobin
5	421455	rs11741954	AHRR	T	G	T	0.015396	T	G	0.015396	4.90004e-15	0.001965	545203	ebi-a-GCST90002363	Red blood cell count
5	421455	rs11741954	AHRR	T	G	T	0.016593	T	G	0.016593	5.51061e-17	0.00198	563946	ebi-a-GCST90002310	Hemoglobin concentration
5	421455	rs11741954	AHRR	T	G	T	0.018465	T	G	0.018465	1.29987e-20	0.001982	562259	ebi-a-GCST90002304	Hematocrit
5	421455	rs11741954	AHRR	T	G	T	0.019299	T	G	0.019299	1e-17	0.00225143	408112	ebi-a-GCST90002383	Hematocrit
5	421455	rs11741954	AHRR	T	G	T	0.0116402	T	G	0.0116402	8.9002e-11	0.00179508	396624	ebi-a-GCST90013978	Haemoglobin concentration (UKB data field 30020)
5	421455	rs11741954	AHRR	T	G	T	0.0124051	T	G	0.0124051	4.72607e-11	0.00188548	396625	ebi-a-GCST90013977	Red blood cell erythrocyte count (UKB data field 30010)
5	421455	rs11741954	AHRR	T	G	T	0.0165783	T	G	0.0165783	2.90001e-16	0.00203473	526540	ebi-a-GCST90029002	Red blood cell count
5	421455	rs11741954	AHRR	T	G	T	0.0169086	T	G	0.0169086	2.19989e-14	0.00221384	408112	ebi-a-GCST90002403	Red blood cell count
5	421455	rs11741954	AHRR	T	G	T	0.0172231	T	G	0.0172231	1.9002e-14	0.00224985	408112	ebi-a-GCST90002384	Hemoglobin
5	422178	rs11742144	AHRR	A	G	A	0.0112	A	G	0.0112	6.36297e-09	0.0019	350474	ebi-a-GCST90018957	Hemoglobin
5	422178	rs11742144	AHRR	A	G	A	0.0117	A	G	0.0117	4.16102e-09	0.002	350475	ebi-a-GCST90018960	Hematocrit
5	422178	rs11742144	AHRR	A	G	A	0.0126	A	G	0.0126	1.66802e-09	0.0021	350475	ebi-a-GCST90018971	Red blood cell count
5	422178	rs11742144	AHRR	A	G	A	0.011682	A	G	0.011682	4.16476e-09	0.00198753	350475	ukb-d-30030_irnt	Haematocrit percentage
5	422178	rs11742144	AHRR	A	G	A	0.015592	A	G	0.015592	2.78997e-16	0.001904	545203	ebi-a-GCST90002363	Red blood cell count
5	422178	rs11742144	AHRR	A	G	A	0.016972	A	G	0.016972	9.53894e-19	0.001918	563946	ebi-a-GCST90002310	Hemoglobin concentration
5	422178	rs11742144	AHRR	A	G	A	0.017941	A	G	0.017941	1.03992e-20	0.001921	562259	ebi-a-GCST90002304	Hematocrit
5	422178	rs11742144	AHRR	A	G	A	0.0112284	A	G	0.0112284	6.36781e-09	0.00193362	350474	ukb-d-30020_irnt	Haemoglobin concentration
5	422178	rs11742144	AHRR	A	G	A	0.0125551	A	G	0.0125551	1.66932e-09	0.00208306	350475	ukb-d-30010_irnt	Red blood cell (erythrocyte) count
5	422178	rs11742144	AHRR	A	G	A	0.0129433	A	G	0.0129433	1.07498e-13	0.00174171	396624	ebi-a-GCST90013978	Haemoglobin concentration (UKB data field 30020)
5	422178	rs11742144	AHRR	A	G	A	0.0133517	A	G	0.0133517	2.91407e-13	0.00182943	396625	ebi-a-GCST90013977	Red blood cell erythrocyte count (UKB data field 30010)
5	422178	rs11742144	AHRR	A	G	A	0.0172711	A	G	0.0172711	8.69961e-16	0.00214721	408112	ebi-a-GCST90002403	Red blood cell count
5	422178	rs11742144	AHRR	A	G	A	0.0173714	A	G	0.0173714	2.09991e-19	0.001974	526540	ebi-a-GCST90029002	Red blood cell count
5	422178	rs11742144	AHRR	A	G	A	0.0176089	A	G	0.0176089	7.10068e-16	0.00218215	408112	ebi-a-GCST90002384	Hemoglobin
5	422178	rs11742144	AHRR	A	G	A	0.0186887	A	G	0.0186887	1.10002e-17	0.00218372	408112	ebi-a-GCST90002383	Hematocrit
5	423169	rs56182240	AHRR	T	C	T	0.0112	T	C	0.0112	6.07701e-09	0.0019	350474	ebi-a-GCST90018957	Hemoglobin
5	423169	rs56182240	AHRR	T	C	T	0.0117	T	C	0.0117	3.13502e-09	0.002	350475	ebi-a-GCST90018960	Hematocrit
5	423169	rs56182240	AHRR	T	C	T	0.0124	T	C	0.0124	2.47702e-09	0.0021	350475	ebi-a-GCST90018971	Red blood cell count
5	423169	rs56182240	AHRR	T	C	T	0.015619	T	C	0.015619	2.09991e-16	0.0019	545203	ebi-a-GCST90002363	Red blood cell count
5	423169	rs56182240	AHRR	T	C	T	0.017041	T	C	0.017041	5.70033e-19	0.001914	563946	ebi-a-GCST90002310	Hemoglobin concentration
5	423169	rs56182240	AHRR	T	C	T	0.017283	T	C	0.017283	2.90001e-19	0.00196921	526540	ebi-a-GCST90029002	Red blood cell count
5	423169	rs56182240	AHRR	T	C	T	0.018076	T	C	0.018076	4.29042e-21	0.001916	562259	ebi-a-GCST90002304	Hematocrit
5	423169	rs56182240	AHRR	T	C	T	0.0112166	T	C	0.0112166	6.08331e-09	0.00192903	350474	ukb-d-30020_irnt	Haemoglobin concentration
5	423169	rs56182240	AHRR	T	C	T	0.0117469	T	C	0.0117469	3.13798e-09	0.00198281	350475	ukb-d-30030_irnt	Haematocrit percentage
5	423169	rs56182240	AHRR	T	C	T	0.0123918	T	C	0.0123918	2.47873e-09	0.00207812	350475	ukb-d-30010_irnt	Red blood cell (erythrocyte) count
5	423169	rs56182240	AHRR	T	C	T	0.0130451	T	C	0.0130451	6.02282e-14	0.0017376	396624	ebi-a-GCST90013978	Haemoglobin concentration (UKB data field 30020)
5	423169	rs56182240	AHRR	T	C	T	0.0132149	T	C	0.0132149	4.46581e-13	0.00182511	396625	ebi-a-GCST90013977	Red blood cell erythrocyte count (UKB data field 30010)
5	423169	rs56182240	AHRR	T	C	T	0.0172573	T	C	0.0172573	7.89951e-16	0.00214204	408112	ebi-a-GCST90002403	Red blood cell count
5	423169	rs56182240	AHRR	T	C	T	0.0177007	T	C	0.0177007	4.30031e-16	0.00217691	408112	ebi-a-GCST90002384	Hemoglobin
5	423169	rs56182240	AHRR	T	C	T	0.0188289	T	C	0.0188289	5.50047e-18	0.00217846	408112	ebi-a-GCST90002383	Hematocrit
5	423595	rs56346498	AHRR	T	C	T	0.0112	T	C	0.0112	6.13098e-09	0.0019	350474	ebi-a-GCST90018957	Hemoglobin
5	423595	rs56346498	AHRR	T	C	T	0.0118	T	C	0.0118	3.01703e-09	0.002	350475	ebi-a-GCST90018960	Hematocrit
5	423595	rs56346498	AHRR	T	C	T	0.0124	T	C	0.0124	2.35402e-09	0.0021	350475	ebi-a-GCST90018971	Red blood cell count
5	423595	rs56346498	AHRR	T	C	T	0.011756	T	C	0.011756	3.01974e-09	0.00198224	350475	ukb-d-30030_irnt	Haematocrit percentage
5	423595	rs56346498	AHRR	T	C	T	0.015652	T	C	0.015652	1.80011e-16	0.001899	545203	ebi-a-GCST90002363	Red blood cell count
5	423595	rs56346498	AHRR	T	C	T	0.017061	T	C	0.017061	5.10035e-19	0.001913	563946	ebi-a-GCST90002310	Hemoglobin concentration
5	423595	rs56346498	AHRR	T	C	T	0.018103	T	C	0.018103	3.68978e-21	0.001916	562259	ebi-a-GCST90002304	Hematocrit
5	423595	rs56346498	AHRR	T	C	T	0.0112106	T	C	0.0112106	6.13494e-09	0.00192849	350474	ukb-d-30020_irnt	Haemoglobin concentration
5	423595	rs56346498	AHRR	T	C	T	0.0124054	T	C	0.0124054	2.35695e-09	0.00207752	350475	ukb-d-30010_irnt	Red blood cell (erythrocyte) count
5	423595	rs56346498	AHRR	T	C	T	0.0130364	T	C	0.0130364	6.15886e-14	0.00173711	396624	ebi-a-GCST90013978	Haemoglobin concentration (UKB data field 30020)
5	423595	rs56346498	AHRR	T	C	T	0.0132246	T	C	0.0132246	4.23058e-13	0.00182459	396625	ebi-a-GCST90013977	Red blood cell erythrocyte count (UKB data field 30010)
5	423595	rs56346498	AHRR	T	C	T	0.0172769	T	C	0.0172769	7.10068e-16	0.00214143	408112	ebi-a-GCST90002403	Red blood cell count
5	423595	rs56346498	AHRR	T	C	T	0.0172917	T	C	0.0172917	2.80027e-19	0.00196865	526540	ebi-a-GCST90029002	Red blood cell count
5	423595	rs56346498	AHRR	T	C	T	0.0176983	T	C	0.0176983	4.19952e-16	0.00217629	408112	ebi-a-GCST90002384	Hemoglobin
5	423595	rs56346498	AHRR	T	C	T	0.0188357	T	C	0.0188357	5.19996e-18	0.00217783	408112	ebi-a-GCST90002383	Hematocrit
5	423671	rs55948934	AHRR	T	C	T	0.0112	T	C	0.0112	7.19201e-09	0.0019	350474	ebi-a-GCST90018957	Hemoglobin
5	423671	rs55948934	AHRR	T	C	T	0.0118	T	C	0.0118	3.046e-09	0.002	350475	ebi-a-GCST90018960	Hematocrit
5	423671	rs55948934	AHRR	T	C	T	0.0125	T	C	0.0125	2.034e-09	0.0021	350475	ebi-a-GCST90018971	Red blood cell count
5	423671	rs55948934	AHRR	T	C	T	0.011185	T	C	0.011185	7.19896e-09	0.00193299	350474	ukb-d-30020_irnt	Haemoglobin concentration
5	423671	rs55948934	AHRR	T	C	T	0.012484	T	C	0.012484	2.03573e-09	0.00208238	350475	ukb-d-30010_irnt	Red blood cell (erythrocyte) count
5	423671	rs55948934	AHRR	T	C	T	0.016455	T	C	0.016455	5.50047e-17	0.001963	545203	ebi-a-GCST90002363	Red blood cell count
5	423671	rs55948934	AHRR	T	C	T	0.017723	T	C	0.017723	4.49987e-16	0.00218136	408112	ebi-a-GCST90002384	Hemoglobin
5	423671	rs55948934	AHRR	T	C	T	0.018028	T	C	0.018028	1.29987e-19	0.001988	563946	ebi-a-GCST90002310	Hemoglobin concentration
5	423671	rs55948934	AHRR	T	C	T	0.018842	T	C	0.018842	2.73023e-21	0.001988	562259	ebi-a-GCST90002304	Hematocrit
5	423671	rs55948934	AHRR	T	C	T	0.0117804	T	C	0.0117804	3.04867e-09	0.00198688	350475	ukb-d-30030_irnt	Haematocrit percentage
5	423671	rs55948934	AHRR	T	C	T	0.0129884	T	C	0.0129884	8.66762e-14	0.00174113	396624	ebi-a-GCST90013978	Haemoglobin concentration (UKB data field 30020)
5	423671	rs55948934	AHRR	T	C	T	0.0132657	T	C	0.0132657	4.05509e-13	0.00182882	396625	ebi-a-GCST90013977	Red blood cell erythrocyte count (UKB data field 30010)
5	423671	rs55948934	AHRR	T	C	T	0.0174187	T	C	0.0174187	4.79954e-16	0.00214642	408112	ebi-a-GCST90002403	Red blood cell count
5	423671	rs55948934	AHRR	T	C	T	0.0189151	T	C	0.0189151	4.49987e-18	0.00218291	408112	ebi-a-GCST90002383	Hematocrit
5	423906	rs55932239	AHRR	A	G	A	0.0112	A	G	0.0112	6.04603e-09	0.0019	350474	ebi-a-GCST90018957	Hemoglobin
5	423906	rs55932239	AHRR	A	G	A	0.0118	A	G	0.0118	2.97502e-09	0.002	350475	ebi-a-GCST90018960	Hematocrit
5	423906	rs55932239	AHRR	A	G	A	0.0124	A	G	0.0124	2.22101e-09	0.0021	350475	ebi-a-GCST90018971	Red blood cell count
5	423906	rs55932239	AHRR	A	G	A	0.01717	A	G	0.01717	3.01995e-19	0.001913	563946	ebi-a-GCST90002310	Hemoglobin concentration
5	423906	rs55932239	AHRR	A	G	A	0.015724	A	G	0.015724	1.29987e-16	0.001899	545203	ebi-a-GCST90002363	Red blood cell count
5	423906	rs55932239	AHRR	A	G	A	0.018197	A	G	0.018197	2.27982e-21	0.001916	562259	ebi-a-GCST90002304	Hematocrit
5	423906	rs55932239	AHRR	A	G	A	0.0112143	A	G	0.0112143	6.05104e-09	0.00192835	350474	ukb-d-30020_irnt	Haemoglobin concentration
5	423906	rs55932239	AHRR	A	G	A	0.0117597	A	G	0.0117597	2.97817e-09	0.0019821	350475	ukb-d-30030_irnt	Haematocrit percentage
5	423906	rs55932239	AHRR	A	G	A	0.0124243	A	G	0.0124243	2.22275e-09	0.00207737	350475	ukb-d-30010_irnt	Red blood cell (erythrocyte) count
5	423906	rs55932239	AHRR	A	G	A	0.0130328	A	G	0.0130328	6.23017e-14	0.00173697	396624	ebi-a-GCST90013978	Haemoglobin concentration (UKB data field 30020)
5	423906	rs55932239	AHRR	A	G	A	0.0132585	A	G	0.0132585	3.67282e-13	0.00182445	396625	ebi-a-GCST90013977	Red blood cell erythrocyte count (UKB data field 30010)
5	423906	rs55932239	AHRR	A	G	A	0.0173282	A	G	0.0173282	5.79963e-16	0.00214121	408112	ebi-a-GCST90002403	Red blood cell count
5	423906	rs55932239	AHRR	A	G	A	0.0173606	A	G	0.0173606	2.09991e-19	0.00196846	526540	ebi-a-GCST90029002	Red blood cell count
5	423906	rs55932239	AHRR	A	G	A	0.0174699	A	G	0.0174699	1.50003e-19	0.00203519	445373	ebi-a-GCST90025969	Hemoglobin levels
5	423906	rs55932239	AHRR	A	G	A	0.0177394	A	G	0.0177394	3.59998e-16	0.00217607	408112	ebi-a-GCST90002384	Hemoglobin
5	423906	rs55932239	AHRR	A	G	A	0.0178111	A	G	0.0178111	1.80011e-20	0.00196598	445305	ebi-a-GCST90025964	Red blood cell count
5	423906	rs55932239	AHRR	A	G	A	0.0188547	A	G	0.0188547	4.79954e-18	0.00217761	408112	ebi-a-GCST90002383	Hematocrit
5	428236	rs12188164	AHRR	A	C	A	0.0112	A	C	0.0112	4.79303e-09	0.0019	350474	ebi-a-GCST90018957	Hemoglobin
5	428236	rs12188164	AHRR	A	C	A	0.0118	A	C	0.0118	2.40497e-09	0.002	350475	ebi-a-GCST90018960	Hematocrit
5	428236	rs12188164	AHRR	A	C	A	0.0124	A	C	0.0124	2.13698e-09	0.0021	350475	ebi-a-GCST90018971	Red blood cell count
5	428236	rs12188164	AHRR	A	C	A	0.01757	A	C	0.01757	2.49977e-20	0.00194614	445305	ebi-a-GCST90025964	Red blood cell count
5	428236	rs12188164	AHRR	A	C	A	0.015724	A	C	0.015724	1.11995e-16	0.001895	545203	ebi-a-GCST90002363	Red blood cell count
5	428236	rs12188164	AHRR	A	C	A	0.017166	A	C	0.017166	2.59e-19	0.001909	563946	ebi-a-GCST90002310	Hemoglobin concentration
5	428236	rs12188164	AHRR	A	C	A	0.017258	A	C	0.017258	1.59993e-19	0.00201466	445373	ebi-a-GCST90025969	Hemoglobin levels
5	428236	rs12188164	AHRR	A	C	A	0.017281	A	C	0.017281	2.29985e-19	0.00196228	526540	ebi-a-GCST90029002	Red blood cell count
5	428236	rs12188164	AHRR	A	C	A	0.017687	A	C	0.017687	3.50026e-16	0.00216923	408112	ebi-a-GCST90002384	Hemoglobin
5	428236	rs12188164	AHRR	A	C	A	0.018165	A	C	0.018165	2.21004e-21	0.001912	562259	ebi-a-GCST90002304	Hematocrit
5	428236	rs12188164	AHRR	A	C	A	0.0112786	A	C	0.0112786	4.43527e-09	0.0019223	350474	ukb-d-30020_irnt	Haemoglobin concentration
5	428236	rs12188164	AHRR	A	C	A	0.0118466	A	C	0.0118466	2.02904e-09	0.00197588	350475	ukb-d-30030_irnt	Haematocrit percentage
5	428236	rs12188164	AHRR	A	C	A	0.0124921	A	C	0.0124921	1.61748e-09	0.00207086	350475	ukb-d-30010_irnt	Red blood cell (erythrocyte) count
5	428236	rs12188164	AHRR	A	C	A	0.0129956	A	C	0.0129956	6.13056e-14	0.00173153	396624	ebi-a-GCST90013978	Haemoglobin concentration (UKB data field 30020)
5	428236	rs12188164	AHRR	A	C	A	0.0131465	A	C	0.0131465	4.88765e-13	0.00181873	396625	ebi-a-GCST90013977	Red blood cell erythrocyte count (UKB data field 30010)
5	428236	rs12188164	AHRR	A	C	A	0.0172747	A	C	0.0172747	5.79963e-16	0.00213448	408112	ebi-a-GCST90002403	Red blood cell count
5	428236	rs12188164	AHRR	A	C	A	0.0188379	A	C	0.0188379	4.00037e-18	0.00217076	408112	ebi-a-GCST90002383	Hematocrit
5	429124	rs72717411	AHRR	G	C	G	0.0112	G	C	0.0112	5.03002e-09	0.0019	350474	ebi-a-GCST90018957	Hemoglobin
5	429124	rs72717411	AHRR	G	C	G	0.0118	G	C	0.0118	2.56301e-09	0.002	350475	ebi-a-GCST90018960	Hematocrit
5	429124	rs72717411	AHRR	G	C	G	0.0124	G	C	0.0124	2.329e-09	0.0021	350475	ebi-a-GCST90018971	Red blood cell count
5	429124	rs72717411	AHRR	G	C	G	0.012999	G	C	0.012999	6.13056e-14	0.00173198	396624	ebi-a-GCST90013978	Haemoglobin concentration (UKB data field 30020)
5	429124	rs72717411	AHRR	G	C	G	0.015594	G	C	0.015594	1.82012e-16	0.001892	545203	ebi-a-GCST90002363	Red blood cell count
5	429124	rs72717411	AHRR	G	C	G	0.017049	G	C	0.017049	4.02995e-19	0.001906	563946	ebi-a-GCST90002310	Hemoglobin concentration
5	429124	rs72717411	AHRR	G	C	G	0.018027	G	C	0.018027	3.87972e-21	0.001909	562259	ebi-a-GCST90002304	Hematocrit
5	429124	rs72717411	AHRR	G	C	G	0.0112673	G	C	0.0112673	4.63735e-09	0.00192281	350474	ukb-d-30020_irnt	Haemoglobin concentration
5	429124	rs72717411	AHRR	G	C	G	0.0118306	G	C	0.0118306	2.15362e-09	0.00197641	350475	ukb-d-30030_irnt	Haematocrit percentage
5	429124	rs72717411	AHRR	G	C	G	0.0124672	G	C	0.0124672	1.75979e-09	0.00207141	350475	ukb-d-30010_irnt	Red blood cell (erythrocyte) count
5	429124	rs72717411	AHRR	G	C	G	0.0131298	G	C	0.0131298	5.30152e-13	0.0018192	396625	ebi-a-GCST90013977	Red blood cell erythrocyte count (UKB data field 30010)
5	429124	rs72717411	AHRR	G	C	G	0.0172584	G	C	0.0172584	6.29941e-16	0.00213504	408112	ebi-a-GCST90002403	Red blood cell count
5	429124	rs72717411	AHRR	G	C	G	0.0172682	G	C	0.0172682	2.49977e-19	0.00196278	526540	ebi-a-GCST90029002	Red blood cell count
5	429124	rs72717411	AHRR	G	C	G	0.0176992	G	C	0.0176992	3.40017e-16	0.0021698	408112	ebi-a-GCST90002384	Hemoglobin
5	429124	rs72717411	AHRR	G	C	G	0.0188292	G	C	0.0188292	4.30031e-18	0.00217133	408112	ebi-a-GCST90002383	Hematocrit
5	429582	rs113129808	AHRR	T	G	T	0.0112	T	G	0.0112	6.47993e-09	0.0019	350474	ebi-a-GCST90018957	Hemoglobin
5	429582	rs113129808	AHRR	T	G	T	0.0118	T	G	0.0118	2.87899e-09	0.002	350475	ebi-a-GCST90018960	Hematocrit
5	429582	rs113129808	AHRR	T	G	T	0.0125	T	G	0.0125	1.789e-09	0.0021	350475	ebi-a-GCST90018971	Red blood cell count
5	429582	rs113129808	AHRR	T	G	T	0.015782	T	G	0.015782	1.59001e-15	0.001979	545203	ebi-a-GCST90002363	Red blood cell count
5	429582	rs113129808	AHRR	T	G	T	0.016594	T	G	0.016594	1.03992e-16	0.001998	563946	ebi-a-GCST90002310	Hemoglobin concentration
5	429582	rs113129808	AHRR	T	G	T	0.017817	T	G	0.017817	5.62989e-19	0.002001	562259	ebi-a-GCST90002304	Hematocrit
5	429582	rs113129808	AHRR	T	G	T	0.0111781	T	G	0.0111781	6.48425e-09	0.00192597	350474	ukb-d-30020_irnt	Haemoglobin concentration
5	429582	rs113129808	AHRR	T	G	T	0.0117559	T	G	0.0117559	2.88164e-09	0.00197965	350475	ukb-d-30030_irnt	Haematocrit percentage
5	429582	rs113129808	AHRR	T	G	T	0.0124819	T	G	0.0124819	1.79044e-09	0.00207481	350475	ukb-d-30010_irnt	Red blood cell (erythrocyte) count
5	429582	rs113129808	AHRR	T	G	T	0.0129507	T	G	0.0129507	8.35988e-14	0.00173497	396624	ebi-a-GCST90013978	Haemoglobin concentration (UKB data field 30020)
5	429582	rs113129808	AHRR	T	G	T	0.0130812	T	G	0.0130812	7.06318e-13	0.00182235	396625	ebi-a-GCST90013977	Red blood cell erythrocyte count (UKB data field 30010)
5	429582	rs113129808	AHRR	T	G	T	0.0172027	T	G	0.0172027	8.69961e-16	0.00213854	408112	ebi-a-GCST90002403	Red blood cell count
5	429582	rs113129808	AHRR	T	G	T	0.0172303	T	G	0.0172303	3.10027e-19	0.00196604	526540	ebi-a-GCST90029002	Red blood cell count
5	429582	rs113129808	AHRR	T	G	T	0.0175285	T	G	0.0175285	7.29962e-16	0.00217334	408112	ebi-a-GCST90002384	Hemoglobin
5	429582	rs113129808	AHRR	T	G	T	0.0187089	T	G	0.0187089	7.8001e-18	0.00217489	408112	ebi-a-GCST90002383	Hematocrit
5	429818	rs72717414	AHRR	G	C	G	0.0113	G	C	0.0113	4.78101e-09	0.0019	350474	ebi-a-GCST90018957	Hemoglobin
5	429818	rs72717414	AHRR	G	C	G	0.0118	G	C	0.0118	2.573e-09	0.002	350475	ebi-a-GCST90018960	Hematocrit
5	429818	rs72717414	AHRR	G	C	G	0.0124	G	C	0.0124	2.25398e-09	0.0021	350475	ebi-a-GCST90018971	Red blood cell count
5	429818	rs72717414	AHRR	G	C	G	0.01562	G	C	0.01562	1.38995e-16	0.001888	545203	ebi-a-GCST90002363	Red blood cell count
5	429818	rs72717414	AHRR	G	C	G	0.01868	G	C	0.01868	3.68978e-23	0.001883	562259	ebi-a-GCST90002304	Hematocrit
5	429818	rs72717414	AHRR	G	C	G	0.017518	G	C	0.017518	1.29987e-20	0.001881	563946	ebi-a-GCST90002310	Hemoglobin concentration
5	429818	rs72717414	AHRR	G	C	G	0.017705	G	C	0.017705	3.40017e-16	0.00217056	408112	ebi-a-GCST90002384	Hemoglobin
5	429818	rs72717414	AHRR	G	C	G	0.0112933	G	C	0.0112933	4.32853e-09	0.00192348	350474	ukb-d-30020_irnt	Haemoglobin concentration
5	429818	rs72717414	AHRR	G	C	G	0.0118391	G	C	0.0118391	2.12496e-09	0.0019771	350475	ukb-d-30030_irnt	Haematocrit percentage
5	429818	rs72717414	AHRR	G	C	G	0.0124866	G	C	0.0124866	1.68287e-09	0.00207213	350475	ukb-d-30010_irnt	Red blood cell (erythrocyte) count
5	429818	rs72717414	AHRR	G	C	G	0.0130135	G	C	0.0130135	5.87219e-14	0.00173261	396624	ebi-a-GCST90013978	Haemoglobin concentration (UKB data field 30020)
5	429818	rs72717414	AHRR	G	C	G	0.0131406	G	C	0.0131406	5.17369e-13	0.00181986	396625	ebi-a-GCST90013977	Red blood cell erythrocyte count (UKB data field 30010)
5	429818	rs72717414	AHRR	G	C	G	0.0172786	G	C	0.0172786	2.49977e-19	0.00196347	526540	ebi-a-GCST90029002	Red blood cell count
5	429818	rs72717414	AHRR	G	C	G	0.0172837	G	C	0.0172837	5.79963e-16	0.00213579	408112	ebi-a-GCST90002403	Red blood cell count
5	429818	rs72717414	AHRR	G	C	G	0.0188329	G	C	0.0188329	4.30031e-18	0.0021721	408112	ebi-a-GCST90002383	Hematocrit
5	430059	rs72717415	AHRR	A	G	A	0.0113	A	G	0.0113	4.56699e-09	0.0019	350474	ebi-a-GCST90018957	Hemoglobin
5	430059	rs72717415	AHRR	A	G	A	0.0118	A	G	0.0118	2.36401e-09	0.002	350475	ebi-a-GCST90018960	Hematocrit
5	430059	rs72717415	AHRR	A	G	A	0.0124	A	G	0.0124	2.09599e-09	0.0021	350475	ebi-a-GCST90018971	Red blood cell count
5	430059	rs72717415	AHRR	A	G	A	0.015601	A	G	0.015601	1.74985e-16	0.001892	545203	ebi-a-GCST90002363	Red blood cell count
5	430059	rs72717415	AHRR	A	G	A	0.017056	A	G	0.017056	3.87972e-19	0.001906	563946	ebi-a-GCST90002310	Hemoglobin concentration
5	430059	rs72717415	AHRR	A	G	A	0.018038	A	G	0.018038	3.66016e-21	0.001909	562259	ebi-a-GCST90002304	Hematocrit
5	430059	rs72717415	AHRR	A	G	A	0.0112994	A	G	0.0112994	4.21134e-09	0.00192303	350474	ukb-d-30020_irnt	Haemoglobin concentration
5	430059	rs72717415	AHRR	A	G	A	0.0118581	A	G	0.0118581	1.9855e-09	0.00197663	350475	ukb-d-30030_irnt	Haematocrit percentage
5	430059	rs72717415	AHRR	A	G	A	0.0125042	A	G	0.0125042	1.58234e-09	0.00207164	350475	ukb-d-30010_irnt	Red blood cell (erythrocyte) count
5	430059	rs72717415	AHRR	A	G	A	0.0130038	A	G	0.0130038	6.04644e-14	0.0017322	396624	ebi-a-GCST90013978	Haemoglobin concentration (UKB data field 30020)
5	430059	rs72717415	AHRR	A	G	A	0.0131353	A	G	0.0131353	5.22156e-13	0.00181944	396625	ebi-a-GCST90013977	Red blood cell erythrocyte count (UKB data field 30010)
5	430059	rs72717415	AHRR	A	G	A	0.0172697	A	G	0.0172697	6.09958e-16	0.00213526	408112	ebi-a-GCST90002403	Red blood cell count
5	430059	rs72717415	AHRR	A	G	A	0.0172923	A	G	0.0172923	2.19989e-19	0.001963	526540	ebi-a-GCST90029002	Red blood cell count
5	430059	rs72717415	AHRR	A	G	A	0.0177238	A	G	0.0177238	3.10027e-16	0.00217002	408112	ebi-a-GCST90002384	Hemoglobin
5	430059	rs72717415	AHRR	A	G	A	0.0188455	A	G	0.0188455	4.00037e-18	0.00217156	408112	ebi-a-GCST90002383	Hematocrit
5	430217	rs957791	AHRR	T	C	T	0.013621	T	C	0.013621	3.01995e-13	0.001866	545203	ebi-a-GCST90002363	Red blood cell count
5	430217	rs957791	AHRR	T	C	T	0.016342	T	C	0.016342	3.80014e-18	0.00188	563946	ebi-a-GCST90002310	Hemoglobin concentration
5	430217	rs957791	AHRR	T	C	T	0.016928	T	C	0.016928	2.61999e-19	0.001883	562259	ebi-a-GCST90002304	Hematocrit
5	430217	rs957791	AHRR	T	C	T	0.0111432	T	C	0.0111432	4.47992e-10	0.00178683	396625	ebi-a-GCST90013977	Red blood cell erythrocyte count (UKB data field 30010)
5	430217	rs957791	AHRR	T	C	T	0.0120424	T	C	0.0120424	1.45245e-12	0.00170116	396624	ebi-a-GCST90013978	Haemoglobin concentration (UKB data field 30020)
5	430217	rs957791	AHRR	T	C	T	0.0149141	T	C	0.0149141	1.10002e-12	0.00209644	408112	ebi-a-GCST90002403	Red blood cell count
5	430217	rs957791	AHRR	T	C	T	0.0153221	T	C	0.0153221	4.49987e-16	0.00192685	526540	ebi-a-GCST90029002	Red blood cell count
5	430217	rs957791	AHRR	T	C	T	0.0155162	T	C	0.0155162	5.30029e-17	0.00191094	445305	ebi-a-GCST90025964	Red blood cell count
5	430217	rs957791	AHRR	T	C	T	0.0167186	T	C	0.0167186	9.70063e-19	0.00197825	445373	ebi-a-GCST90025969	Hemoglobin levels
5	430217	rs957791	AHRR	T	C	T	0.0169401	T	C	0.0169401	1.9002e-15	0.00213068	408112	ebi-a-GCST90002384	Hemoglobin
5	430217	rs957791	AHRR	T	C	T	0.0176365	T	C	0.0176365	1.29987e-16	0.00213214	408112	ebi-a-GCST90002383	Hematocrit
5	434722	rs34453673	AHRR	C	G	C	0.0113	C	G	0.0113	4.61105e-09	0.0019	350474	ebi-a-GCST90018957	Hemoglobin
5	434722	rs34453673	AHRR	C	G	C	0.0118	C	G	0.0118	2.225e-09	0.002	350475	ebi-a-GCST90018960	Hematocrit
5	434722	rs34453673	AHRR	C	G	C	0.0125	C	G	0.0125	1.55199e-09	0.0021	350475	ebi-a-GCST90018971	Red blood cell count
5	434722	rs34453673	AHRR	C	G	C	0.013144	C	G	0.013144	5.04429e-13	0.00181947	396625	ebi-a-GCST90013977	Red blood cell erythrocyte count (UKB data field 30010)
5	434722	rs34453673	AHRR	C	G	C	0.015669	C	G	0.015669	1.05999e-16	0.001887	545203	ebi-a-GCST90002363	Red blood cell count
5	434722	rs34453673	AHRR	C	G	C	0.017229	C	G	0.017229	7.00003e-16	0.00213474	408112	ebi-a-GCST90002403	Red blood cell count
5	434722	rs34453673	AHRR	C	G	C	0.017649	C	G	0.017649	6.36942e-21	0.001879	563946	ebi-a-GCST90002310	Hemoglobin concentration
5	434722	rs34453673	AHRR	C	G	C	0.017825	C	G	0.017825	2.09991e-16	0.00216949	408112	ebi-a-GCST90002384	Hemoglobin
5	434722	rs34453673	AHRR	C	G	C	0.018706	C	G	0.018706	2.99985e-23	0.001882	562259	ebi-a-GCST90002304	Hematocrit
5	434722	rs34453673	AHRR	C	G	C	0.0113178	C	G	0.0113178	3.94212e-09	0.00192259	350474	ukb-d-30020_irnt	Haemoglobin concentration
5	434722	rs34453673	AHRR	C	G	C	0.0118948	C	G	0.0118948	1.75586e-09	0.00197618	350475	ukb-d-30030_irnt	Haematocrit percentage
5	434722	rs34453673	AHRR	C	G	C	0.0126282	C	G	0.0126282	1.08114e-09	0.00207117	350475	ukb-d-30010_irnt	Red blood cell (erythrocyte) count
5	434722	rs34453673	AHRR	C	G	C	0.0130294	C	G	0.0130294	5.4063e-14	0.00173223	396624	ebi-a-GCST90013978	Haemoglobin concentration (UKB data field 30020)
5	434722	rs34453673	AHRR	C	G	C	0.0170968	C	G	0.0170968	6.09958e-19	0.00196283	526540	ebi-a-GCST90029002	Red blood cell count
5	434722	rs34453673	AHRR	C	G	C	0.0173736	C	G	0.0173736	1.69981e-19	0.00202673	445373	ebi-a-GCST90025969	Hemoglobin levels
5	434722	rs34453673	AHRR	C	G	C	0.0177027	C	G	0.0177027	2.19989e-20	0.0019578	445305	ebi-a-GCST90025964	Red blood cell count
5	434722	rs34453673	AHRR	C	G	C	0.0188433	C	G	0.0188433	4.00037e-18	0.00217103	408112	ebi-a-GCST90002383	Hematocrit
5	436981	rs35342079	AHRR	G	A	G	0.014121	G	A	0.014121	1.27997e-13	0.001905	545203	ebi-a-GCST90002363	Red blood cell count
5	436981	rs35342079	AHRR	G	A	G	0.014626	G	A	0.014626	2.64972e-14	0.001919	563946	ebi-a-GCST90002310	Hemoglobin concentration
5	436981	rs35342079	AHRR	G	A	G	0.016222	G	A	0.016222	3.34965e-17	0.001922	562259	ebi-a-GCST90002304	Hematocrit
5	436981	rs35342079	AHRR	G	A	G	0.0104613	G	A	0.0104613	1.63644e-09	0.00173478	396624	ebi-a-GCST90013978	Haemoglobin concentration (UKB data field 30020)
5	436981	rs35342079	AHRR	G	A	G	0.0106778	G	A	0.0106778	4.6286e-09	0.00182215	396625	ebi-a-GCST90013977	Red blood cell erythrocyte count (UKB data field 30010)
5	436981	rs35342079	AHRR	G	A	G	0.0143305	G	A	0.0143305	4.30031e-11	0.00217394	408112	ebi-a-GCST90002384	Hemoglobin
5	436981	rs35342079	AHRR	G	A	G	0.0147276	G	A	0.0147276	5.79963e-14	0.00196656	526540	ebi-a-GCST90029002	Red blood cell count
5	436981	rs35342079	AHRR	G	A	G	0.0152851	G	A	0.0152851	8.99912e-13	0.00213913	408112	ebi-a-GCST90002403	Red blood cell count
5	436981	rs35342079	AHRR	G	A	G	0.0160845	G	A	0.0160845	1.39991e-13	0.0021755	408112	ebi-a-GCST90002383	Hematocrit
5	437542	rs56104584	AHRR	C	T	C	0.0113	C	T	0.0113	4.10696e-09	0.0019	350474	ebi-a-GCST90018957	Hemoglobin
5	437542	rs56104584	AHRR	C	T	C	0.0118	C	T	0.0118	2.068e-09	0.002	350475	ebi-a-GCST90018960	Hematocrit
5	437542	rs56104584	AHRR	C	T	C	0.0125	C	T	0.0125	1.532e-09	0.0021	350475	ebi-a-GCST90018971	Red blood cell count
5	437542	rs56104584	AHRR	C	T	C	0.01802	C	T	0.01802	3.93007e-21	0.001909	562259	ebi-a-GCST90002304	Hematocrit
5	437542	rs56104584	AHRR	C	T	C	0.011352	C	T	0.011352	3.58806e-09	0.00192331	350474	ukb-d-30020_irnt	Haemoglobin concentration
5	437542	rs56104584	AHRR	C	T	C	0.015611	C	T	0.015611	1.65997e-16	0.001892	545203	ebi-a-GCST90002363	Red blood cell count
5	437542	rs56104584	AHRR	C	T	C	0.017036	C	T	0.017036	4.19952e-19	0.001906	563946	ebi-a-GCST90002310	Hemoglobin concentration
5	437542	rs56104584	AHRR	C	T	C	0.0119151	C	T	0.0119151	1.67121e-09	0.00197692	350475	ukb-d-30030_irnt	Haematocrit percentage
5	437542	rs56104584	AHRR	C	T	C	0.0126168	C	T	0.0126168	1.13483e-09	0.00207195	350475	ukb-d-30010_irnt	Red blood cell (erythrocyte) count
5	437542	rs56104584	AHRR	C	T	C	0.0130275	C	T	0.0130275	5.50301e-14	0.00173252	396624	ebi-a-GCST90013978	Haemoglobin concentration (UKB data field 30020)
5	437542	rs56104584	AHRR	C	T	C	0.0132281	C	T	0.0132281	3.6191e-13	0.00181977	396625	ebi-a-GCST90013977	Red blood cell erythrocyte count (UKB data field 30010)
5	437542	rs56104584	AHRR	C	T	C	0.0173473	C	T	0.0173473	4.60045e-16	0.00213568	408112	ebi-a-GCST90002403	Red blood cell count
5	437542	rs56104584	AHRR	C	T	C	0.0173647	C	T	0.0173647	1.29987e-19	0.00196339	526540	ebi-a-GCST90029002	Red blood cell count
5	437542	rs56104584	AHRR	C	T	C	0.0177149	C	T	0.0177149	3.29989e-16	0.00217045	408112	ebi-a-GCST90002384	Hemoglobin
5	437542	rs56104584	AHRR	C	T	C	0.0188964	C	T	0.0188964	3.29989e-18	0.00217198	408112	ebi-a-GCST90002383	Hematocrit
5	437586	rs55842567	AHRR	A	G	A	0.0113	A	G	0.0113	3.99899e-09	0.0019	350474	ebi-a-GCST90018957	Hemoglobin
5	437586	rs55842567	AHRR	A	G	A	0.0118	A	G	0.0118	2.04701e-09	0.002	350475	ebi-a-GCST90018960	Hematocrit
5	437586	rs55842567	AHRR	A	G	A	0.0125	A	G	0.0125	1.563e-09	0.0021	350475	ebi-a-GCST90018971	Red blood cell count
5	437586	rs55842567	AHRR	A	G	A	0.01305	A	G	0.01305	4.99574e-14	0.0017326	396624	ebi-a-GCST90013978	Haemoglobin concentration (UKB data field 30020)
5	437586	rs55842567	AHRR	A	G	A	0.015596	A	G	0.015596	1.77992e-16	0.001892	545203	ebi-a-GCST90002363	Red blood cell count
5	437586	rs55842567	AHRR	A	G	A	0.017043	A	G	0.017043	4.07005e-19	0.001906	563946	ebi-a-GCST90002310	Hemoglobin concentration
5	437586	rs55842567	AHRR	A	G	A	0.018034	A	G	0.018034	3.67959e-21	0.001909	562259	ebi-a-GCST90002304	Hematocrit
5	437586	rs55842567	AHRR	A	G	A	0.0113613	A	G	0.0113613	3.4914e-09	0.00192342	350474	ukb-d-30020_irnt	Haemoglobin concentration
5	437586	rs55842567	AHRR	A	G	A	0.0119193	A	G	0.0119193	1.65253e-09	0.00197704	350475	ukb-d-30030_irnt	Haematocrit percentage
5	437586	rs55842567	AHRR	A	G	A	0.0126111	A	G	0.0126111	1.15699e-09	0.00207207	350475	ukb-d-30010_irnt	Red blood cell (erythrocyte) count
5	437586	rs55842567	AHRR	A	G	A	0.0132109	A	G	0.0132109	3.89135e-13	0.00181986	396625	ebi-a-GCST90013977	Red blood cell erythrocyte count (UKB data field 30010)
5	437586	rs55842567	AHRR	A	G	A	0.0173283	A	G	0.0173283	4.90004e-16	0.00213578	408112	ebi-a-GCST90002403	Red blood cell count
5	437586	rs55842567	AHRR	A	G	A	0.0173371	A	G	0.0173371	1.50003e-19	0.00196347	526540	ebi-a-GCST90029002	Red blood cell count
5	437586	rs55842567	AHRR	A	G	A	0.0177335	A	G	0.0177335	3.10027e-16	0.00217055	408112	ebi-a-GCST90002384	Hemoglobin
5	437586	rs55842567	AHRR	A	G	A	0.0189007	A	G	0.0189007	3.29989e-18	0.00217208	408112	ebi-a-GCST90002383	Hematocrit
5	437667	rs56042615	AHRR	A	G	A	0.0113	A	G	0.0113	3.98703e-09	0.0019	350474	ebi-a-GCST90018957	Hemoglobin
5	437667	rs56042615	AHRR	A	G	A	0.0118	A	G	0.0118	2.082e-09	0.002	350475	ebi-a-GCST90018960	Hematocrit
5	437667	rs56042615	AHRR	A	G	A	0.0125	A	G	0.0125	1.575e-09	0.0021	350475	ebi-a-GCST90018971	Red blood cell count
5	437667	rs56042615	AHRR	A	G	A	0.01891	A	G	0.01891	3.10027e-18	0.002172	408112	ebi-a-GCST90002383	Hematocrit
5	437667	rs56042615	AHRR	A	G	A	0.015627	A	G	0.015627	1.53993e-16	0.001892	545203	ebi-a-GCST90002363	Red blood cell count
5	437667	rs56042615	AHRR	A	G	A	0.017068	A	G	0.017068	3.59998e-19	0.001906	563946	ebi-a-GCST90002310	Hemoglobin concentration
5	437667	rs56042615	AHRR	A	G	A	0.018054	A	G	0.018054	3.29989e-21	0.001909	562259	ebi-a-GCST90002304	Hematocrit
5	437667	rs56042615	AHRR	A	G	A	0.0113613	A	G	0.0113613	3.48578e-09	0.00192334	350474	ukb-d-30020_irnt	Haemoglobin concentration
5	437667	rs56042615	AHRR	A	G	A	0.0119128	A	G	0.0119128	1.68395e-09	0.00197696	350475	ukb-d-30030_irnt	Haematocrit percentage
5	437667	rs56042615	AHRR	A	G	A	0.0126074	A	G	0.0126074	1.1684e-09	0.00207198	350475	ukb-d-30010_irnt	Red blood cell (erythrocyte) count
5	437667	rs56042615	AHRR	A	G	A	0.0130636	A	G	0.0130636	4.6957e-14	0.00173255	396624	ebi-a-GCST90013978	Haemoglobin concentration (UKB data field 30020)
5	437667	rs56042615	AHRR	A	G	A	0.0132164	A	G	0.0132164	3.79839e-13	0.0018198	396625	ebi-a-GCST90013977	Red blood cell erythrocyte count (UKB data field 30010)
5	437667	rs56042615	AHRR	A	G	A	0.0173264	A	G	0.0173264	4.90004e-16	0.0021357	408112	ebi-a-GCST90002403	Red blood cell count
5	437667	rs56042615	AHRR	A	G	A	0.0173323	A	G	0.0173323	1.50003e-19	0.00196341	526540	ebi-a-GCST90029002	Red blood cell count
5	437667	rs56042615	AHRR	A	G	A	0.0177526	A	G	0.0177526	2.90001e-16	0.00217047	408112	ebi-a-GCST90002384	Hemoglobin
5	437862	rs34847072	AHRR	C	G	C	0.0114	C	G	0.0114	3.182e-09	0.0019	350474	ebi-a-GCST90018957	Hemoglobin
5	437862	rs34847072	AHRR	C	G	C	0.0119	C	G	0.0119	1.72401e-09	0.002	350475	ebi-a-GCST90018960	Hematocrit
5	437862	rs34847072	AHRR	C	G	C	0.0126	C	G	0.0126	1.32999e-09	0.0021	350475	ebi-a-GCST90018971	Red blood cell count
5	437862	rs34847072	AHRR	C	G	C	0.015683	C	G	0.015683	1.13999e-16	0.00189	545203	ebi-a-GCST90002363	Red blood cell count
5	437862	rs34847072	AHRR	C	G	C	0.017088	C	G	0.017088	3.05e-19	0.001904	563946	ebi-a-GCST90002310	Hemoglobin concentration
5	437862	rs34847072	AHRR	C	G	C	0.018082	C	G	0.018082	2.66011e-21	0.001907	562259	ebi-a-GCST90002304	Hematocrit
5	437862	rs34847072	AHRR	C	G	C	0.0114337	C	G	0.0114337	2.78048e-09	0.00192351	350474	ukb-d-30020_irnt	Haemoglobin concentration
5	437862	rs34847072	AHRR	C	G	C	0.0119736	C	G	0.0119736	1.39614e-09	0.00197712	350475	ukb-d-30030_irnt	Haematocrit percentage
5	437862	rs34847072	AHRR	C	G	C	0.0126642	C	G	0.0126642	9.8737e-10	0.00207216	350475	ukb-d-30010_irnt	Red blood cell (erythrocyte) count
5	437862	rs34847072	AHRR	C	G	C	0.0131329	C	G	0.0131329	3.46737e-14	0.00173267	396624	ebi-a-GCST90013978	Haemoglobin concentration (UKB data field 30020)
5	437862	rs34847072	AHRR	C	G	C	0.0132934	C	G	0.0132934	2.78612e-13	0.00181993	396625	ebi-a-GCST90013977	Red blood cell erythrocyte count (UKB data field 30010)
5	437862	rs34847072	AHRR	C	G	C	0.0173055	C	G	0.0173055	1.50003e-19	0.00196356	526540	ebi-a-GCST90029002	Red blood cell count
5	437862	rs34847072	AHRR	C	G	C	0.0174343	C	G	0.0174343	3.29989e-16	0.00213587	408112	ebi-a-GCST90002403	Red blood cell count
5	437862	rs34847072	AHRR	C	G	C	0.0177529	C	G	0.0177529	2.90001e-16	0.00217064	408112	ebi-a-GCST90002384	Hemoglobin
5	437862	rs34847072	AHRR	C	G	C	0.0189421	C	G	0.0189421	2.80027e-18	0.00217217	408112	ebi-a-GCST90002383	Hematocrit
5	39434097	rs3849772	DAB2	T	C	C	0.0320286	C	T	-0.0320286	2.76656e-09	0.00538759	388490	ebi-a-GCST90013996	Aspartate aminotransferase levels (UKB data field 30650)
5	39451222	rs12522486	DAB2	A	G	A	-0.530628	A	G	-0.530628	9.90011e-09	0.092566	26405	ebi-a-GCST000964	Ulcerative colitis
6	42022287	rs7453606	CCND3	A	G	A	0.0313	A	G	0.0313	2.00217e-26	0.0029	349856	ebi-a-GCST90018962	Lymphocyte count
6	42022287	rs7453606	CCND3	A	G	A	0.017549	A	G	0.017549	5.54996e-10	0.002827	521591	ieu-b-31	monocyte cell count
6	42022287	rs7453606	CCND3	A	G	A	0.017549	A	G	0.017549	5.54996e-10	0.002827	521594	ebi-a-GCST90002340	Monocyte count
6	42022287	rs7453606	CCND3	A	G	A	0.018401	A	G	0.018401	4.25011e-11	0.002788	562240	ieu-b-30	white blood cell count
6	42022287	rs7453606	CCND3	A	G	A	0.018401	A	G	0.018401	4.25011e-11	0.002788	562243	ebi-a-GCST90002374	White blood cell count
6	42022287	rs7453606	CCND3	A	G	A	0.018992	A	G	0.018992	7.93049e-12	0.002775	542827	ebi-a-GCST90002357	Platelet count
6	42022287	rs7453606	CCND3	A	G	A	0.034788	A	G	0.034788	4.32016e-34	0.002856	524920	ieu-b-32	lymphocyte cell count
6	42022287	rs7453606	CCND3	A	G	A	0.034788	A	G	0.034788	4.32016e-34	0.002856	524923	ebi-a-GCST90002316	Lymphocyte count
6	42022287	rs7453606	CCND3	A	G	A	0.0162671	A	G	0.0162671	1.5e-09	0.00280092	600968	ebi-a-GCST90028999	Platelet count
6	42022287	rs7453606	CCND3	A	G	A	0.0180935	A	G	0.0180935	1.79999e-10	0.00296662	503190	ebi-a-GCST90029003	White blood cell count
6	42022287	rs7453606	CCND3	A	G	A	0.0196149	A	G	0.0196149	5.49997e-10	0.00316169	408112	ebi-a-GCST90002402	Platelet count
6	42022287	rs7453606	CCND3	A	G	A	0.0197847	A	G	0.0197847	5.69259e-10	0.00319175	396621	ebi-a-GCST90013976	White blood cell leukocyte count (UKB data field 30000)
6	42022287	rs7453606	CCND3	A	G	A	0.0202879	A	G	0.0202879	2.51965e-09	0.00340382	350471	ukb-d-30090_irnt	Platelet crit
6	42022287	rs7453606	CCND3	A	G	A	0.0205086	A	G	0.0205086	1.29999e-10	0.00318958	408112	ebi-a-GCST90002407	White blood cell count
6	42022287	rs7453606	CCND3	A	G	A	0.0237175	A	G	0.0237175	2.19989e-13	0.0032338	408112	ebi-a-GCST90002389	Lymphocyte percentage of white cells
6	42022287	rs7453606	CCND3	A	G	A	0.0271762	A	G	0.0271762	1.20005e-17	0.00317887	408112	ebi-a-GCST90002400	Plateletcrit
6	42022287	rs7453606	CCND3	A	G	A	0.0278599	A	G	0.0278599	2.59179e-15	0.00352234	349861	ukb-d-30180_irnt	Lymphocyte percentage
6	42022287	rs7453606	CCND3	A	G	A	0.0311805	A	G	0.0311805	8.48203e-09	0.0054146	171643	ebi-a-GCST004627	Lymphocyte counts
6	42022287	rs7453606	CCND3	A	G	A	0.0353303	A	G	0.0353303	9.20026e-34	0.00296073	509277	ebi-a-GCST90028994	White blood cell count (lymphocyte)
6	42022287	rs7453606	CCND3	A	G	A	0.0365138	A	G	0.0365138	1.0493e-24	0.00355802	349856	ukb-d-30120_irnt	Lymphocyte count
6	42022287	rs7453606	CCND3	A	G	A	0.0371899	A	G	0.0371899	1.50003e-31	0.00318195	408112	ebi-a-GCST90002388	Lymphocyte count
6	42022287	rs7453606	CCND3	A	G	A	0.0384541	A	G	0.0384541	9.08239e-34	0.00317478	395949	ebi-a-GCST90013982	Lymphocyte count (UKB data field 30120)
6	42022287	rs7453606	CCND3	A	G	A	-0.0184303	A	G	-0.0184303	8.60003e-09	0.00320183	408112	ebi-a-GCST90002382	Eosinophil percentage of white cells
6	42022287	rs7453606	CCND3	A	G	A	-0.0187744	A	G	-0.0187744	7.10003e-09	0.00324356	408112	ebi-a-GCST90002399	Neutrophil percentage of white cells
6	42022287	rs7453606	CCND3	A	G	A	-0.0222684	A	G	-0.0222684	3.99264e-10	0.00356038	349861	ukb-d-30200_irnt	Neutrophill percentage
6	42024285	rs10948011	TAF8	A	G	A	0.0312	A	G	0.0312	2.21309e-26	0.0029	349856	ebi-a-GCST90018962	Lymphocyte count
6	42024285	rs10948011	TAF8	A	G	A	0.016292	A	G	0.016292	1.40001e-09	0.00280146	600968	ebi-a-GCST90028999	Platelet count
6	42024285	rs10948011	TAF8	A	G	A	0.017497	A	G	0.017497	6.29999e-10	0.002828	521590	ieu-b-31	monocyte cell count
6	42024285	rs10948011	TAF8	A	G	A	0.017497	A	G	0.017497	6.29999e-10	0.002828	521594	ebi-a-GCST90002340	Monocyte count
6	42024285	rs10948011	TAF8	A	G	A	0.018648	A	G	0.018648	2.5698e-11	0.002794	559080	ieu-b-30	white blood cell count
6	42024285	rs10948011	TAF8	A	G	A	0.018648	A	G	0.018648	2.5698e-11	0.002794	562243	ebi-a-GCST90002374	White blood cell count
6	42024285	rs10948011	TAF8	A	G	A	0.019021	A	G	0.019021	8.23948e-12	0.002781	542827	ebi-a-GCST90002357	Platelet count
6	42024285	rs10948011	TAF8	A	G	A	0.034762	A	G	0.034762	5.00956e-34	0.002857	524919	ieu-b-32	lymphocyte cell count
6	42024285	rs10948011	TAF8	A	G	A	0.034762	A	G	0.034762	5.00956e-34	0.002857	524923	ebi-a-GCST90002316	Lymphocyte count
6	42024285	rs10948011	TAF8	A	G	A	0.037198	A	G	0.037198	1.50003e-31	0.00318256	408112	ebi-a-GCST90002388	Lymphocyte count
6	42024285	rs10948011	TAF8	A	G	A	0.0180926	A	G	0.0180926	1.79999e-10	0.00296719	503190	ebi-a-GCST90029003	White blood cell count
6	42024285	rs10948011	TAF8	A	G	A	0.0196293	A	G	0.0196293	5.39995e-10	0.0031623	408112	ebi-a-GCST90002402	Platelet count
6	42024285	rs10948011	TAF8	A	G	A	0.0197735	A	G	0.0197735	5.86543e-10	0.00319236	396621	ebi-a-GCST90013976	White blood cell leukocyte count (UKB data field 30000)
6	42024285	rs10948011	TAF8	A	G	A	0.0202849	A	G	0.0202849	2.5507e-09	0.00340445	350471	ukb-d-30090_irnt	Platelet crit
6	42024285	rs10948011	TAF8	A	G	A	0.0205291	A	G	0.0205291	1.2e-10	0.00319019	408112	ebi-a-GCST90002407	White blood cell count
6	42024285	rs10948011	TAF8	A	G	A	0.0237055	A	G	0.0237055	2.29985e-13	0.00323443	408112	ebi-a-GCST90002389	Lymphocyte percentage of white cells
6	42024285	rs10948011	TAF8	A	G	A	0.0271836	A	G	0.0271836	1.20005e-17	0.00317948	408112	ebi-a-GCST90002400	Plateletcrit
6	42024285	rs10948011	TAF8	A	G	A	0.0278536	A	G	0.0278536	2.66073e-15	0.003523	349861	ukb-d-30180_irnt	Lymphocyte percentage
6	42024285	rs10948011	TAF8	A	G	A	0.0353265	A	G	0.0353265	9.3994e-34	0.0029613	509277	ebi-a-GCST90028994	White blood cell count (lymphocyte)
6	42024285	rs10948011	TAF8	A	G	A	0.0365067	A	G	0.0365067	1.09245e-24	0.00355868	349856	ukb-d-30120_irnt	Lymphocyte count
6	42024285	rs10948011	TAF8	A	G	A	0.0384522	A	G	0.0384522	9.41239e-34	0.00317539	395949	ebi-a-GCST90013982	Lymphocyte count (UKB data field 30120)
6	42024285	rs10948011	TAF8	A	G	A	-0.022268	A	G	-0.022268	4.02578e-10	0.00356105	349861	ukb-d-30200_irnt	Neutrophill percentage
6	42024285	rs10948011	TAF8	A	G	A	-0.0184435	A	G	-0.0184435	8.50002e-09	0.00320245	408112	ebi-a-GCST90002382	Eosinophil percentage of white cells
6	42024285	rs10948011	TAF8	A	G	A	-0.0187624	A	G	-0.0187624	7.29995e-09	0.00324419	408112	ebi-a-GCST90002399	Neutrophil percentage of white cells
6	42025318	rs12208813	TAF8	A	G	A	0.0312	A	G	0.0312	2.80414e-26	0.0029	349856	ebi-a-GCST90018962	Lymphocyte count
6	42025318	rs12208813	TAF8	A	G	A	0.017503	A	G	0.017503	6.42999e-10	0.00283	520191	ieu-b-31	monocyte cell count
6	42025318	rs12208813	TAF8	A	G	A	0.017503	A	G	0.017503	6.42999e-10	0.00283	521594	ebi-a-GCST90002340	Monocyte count
6	42025318	rs12208813	TAF8	A	G	A	0.018279	A	G	0.018279	6.02976e-11	0.002791	560510	ieu-b-30	white blood cell count
6	42025318	rs12208813	TAF8	A	G	A	0.018279	A	G	0.018279	6.02976e-11	0.002791	562243	ebi-a-GCST90002374	White blood cell count
6	42025318	rs12208813	TAF8	A	G	A	0.018696	A	G	0.018696	1.74985e-11	0.002778	542827	ebi-a-GCST90002357	Platelet count
6	42025318	rs12208813	TAF8	A	G	A	0.027804	A	G	0.027804	2.9902e-15	0.00352321	349861	ukb-d-30180_irnt	Lymphocyte percentage
6	42025318	rs12208813	TAF8	A	G	A	0.034489	A	G	0.034489	1.80011e-33	0.002859	523520	ieu-b-32	lymphocyte cell count
6	42025318	rs12208813	TAF8	A	G	A	0.034489	A	G	0.034489	1.80011e-33	0.002859	524923	ebi-a-GCST90002316	Lymphocyte count
6	42025318	rs12208813	TAF8	A	G	A	0.035285	A	G	0.035285	1.10002e-33	0.0029615	509277	ebi-a-GCST90028994	White blood cell count (lymphocyte)
6	42025318	rs12208813	TAF8	A	G	A	0.0160673	A	G	0.0160673	5.19996e-09	0.00296763	443529	ebi-a-GCST90025950	Monocyte count
6	42025318	rs12208813	TAF8	A	G	A	0.0163078	A	G	0.0163078	1.40001e-09	0.00280165	600968	ebi-a-GCST90028999	Platelet count
6	42025318	rs12208813	TAF8	A	G	A	0.0164839	A	G	0.0164839	6.90001e-10	0.00280094	444866	ebi-a-GCST90025951	Platelet count
6	42025318	rs12208813	TAF8	A	G	A	0.0180797	A	G	0.0180797	1.89998e-10	0.00296739	503190	ebi-a-GCST90029003	White blood cell count
6	42025318	rs12208813	TAF8	A	G	A	0.0194919	A	G	0.0194919	1.69981e-11	0.00300234	444734	ebi-a-GCST90025985	White blood cell count
6	42025318	rs12208813	TAF8	A	G	A	0.0196331	A	G	0.0196331	5.39995e-10	0.00316249	408112	ebi-a-GCST90002402	Platelet count
6	42025318	rs12208813	TAF8	A	G	A	0.0197592	A	G	0.0197592	6.04909e-10	0.00319256	396621	ebi-a-GCST90013976	White blood cell leukocyte count (UKB data field 30000)
6	42025318	rs12208813	TAF8	A	G	A	0.0202761	A	G	0.0202761	2.59657e-09	0.00340465	350471	ukb-d-30090_irnt	Platelet crit
6	42025318	rs12208813	TAF8	A	G	A	0.0205443	A	G	0.0205443	1.2e-10	0.00319039	408112	ebi-a-GCST90002407	White blood cell count
6	42025318	rs12208813	TAF8	A	G	A	0.0236688	A	G	0.0236688	2.49977e-13	0.00323464	408112	ebi-a-GCST90002389	Lymphocyte percentage of white cells
6	42025318	rs12208813	TAF8	A	G	A	0.0271804	A	G	0.0271804	1.29987e-17	0.00317968	408112	ebi-a-GCST90002400	Plateletcrit
6	42025318	rs12208813	TAF8	A	G	A	0.0364451	A	G	0.0364451	1.31492e-24	0.00355889	349856	ukb-d-30120_irnt	Lymphocyte count
6	42025318	rs12208813	TAF8	A	G	A	0.0367591	A	G	0.0367591	7.00003e-36	0.00300105	443762	ebi-a-GCST90025984	Lymphocyte count
6	42025318	rs12208813	TAF8	A	G	A	0.0371711	A	G	0.0371711	1.59993e-31	0.00318277	408112	ebi-a-GCST90002388	Lymphocyte count
6	42025318	rs12208813	TAF8	A	G	A	0.0383922	A	G	0.0383922	1.19564e-33	0.00317559	395949	ebi-a-GCST90013982	Lymphocyte count (UKB data field 30120)
6	42025318	rs12208813	TAF8	A	G	A	-0.018484	A	G	-0.018484	7.90005e-09	0.00320265	408112	ebi-a-GCST90002382	Eosinophil percentage of white cells
6	42025318	rs12208813	TAF8	A	G	A	-0.0187227	A	G	-0.0187227	7.90005e-09	0.00324439	408112	ebi-a-GCST90002399	Neutrophil percentage of white cells
6	42025318	rs12208813	TAF8	A	G	A	-0.0222241	A	G	-0.0222241	4.36586e-10	0.00356126	349861	ukb-d-30200_irnt	Neutrophill percentage
6	42030878	rs12193078	TAF8	G	C	G	0.0311	G	C	0.0311	3.6467e-26	0.0029	349856	ebi-a-GCST90018962	Lymphocyte count
6	42030878	rs12193078	TAF8	G	C	G	0.01843	G	C	0.01843	4.71954e-11	0.002799	562239	ieu-b-30	white blood cell count
6	42030878	rs12193078	TAF8	G	C	G	0.01843	G	C	0.01843	4.71954e-11	0.002799	562243	ebi-a-GCST90002374	White blood cell count
6	42030878	rs12193078	TAF8	G	C	G	0.017567	G	C	0.017567	6.14002e-10	0.002837	521590	ieu-b-31	monocyte cell count
6	42030878	rs12193078	TAF8	G	C	G	0.017567	G	C	0.017567	6.14002e-10	0.002837	521594	ebi-a-GCST90002340	Monocyte count
6	42030878	rs12193078	TAF8	G	C	G	0.018998	G	C	0.018998	9.37994e-12	0.002785	542827	ebi-a-GCST90002357	Platelet count
6	42030878	rs12193078	TAF8	G	C	G	0.034609	G	C	0.034609	1.59001e-33	0.002867	524919	ieu-b-32	lymphocyte cell count
6	42030878	rs12193078	TAF8	G	C	G	0.034609	G	C	0.034609	1.59001e-33	0.002867	524923	ebi-a-GCST90002316	Lymphocyte count
6	42030878	rs12193078	TAF8	G	C	G	0.035274	G	C	0.035274	1.20005e-33	0.00296262	509277	ebi-a-GCST90028994	White blood cell count (lymphocyte)
6	42030878	rs12193078	TAF8	G	C	G	0.036396	G	C	0.036396	1.57725e-24	0.00356022	349856	ukb-d-30120_irnt	Lymphocyte count
6	42030878	rs12193078	TAF8	G	C	G	0.0163647	G	C	0.0163647	1.29999e-09	0.00280271	600968	ebi-a-GCST90028999	Platelet count
6	42030878	rs12193078	TAF8	G	C	G	0.0180948	G	C	0.0180948	1.89998e-10	0.00296852	503190	ebi-a-GCST90029003	White blood cell count
6	42030878	rs12193078	TAF8	G	C	G	0.0196639	G	C	0.0196639	5.1e-10	0.00316368	408112	ebi-a-GCST90002402	Platelet count
6	42030878	rs12193078	TAF8	G	C	G	0.0197614	G	C	0.0197614	6.11533e-10	0.00319381	396621	ebi-a-GCST90013976	White blood cell leukocyte count (UKB data field 30000)
6	42030878	rs12193078	TAF8	G	C	G	0.0202615	G	C	0.0202615	2.70215e-09	0.00340593	350471	ukb-d-30090_irnt	Platelet crit
6	42030878	rs12193078	TAF8	G	C	G	0.0205986	G	C	0.0205986	1.09999e-10	0.0031916	408112	ebi-a-GCST90002407	White blood cell count
6	42030878	rs12193078	TAF8	G	C	G	0.0236284	G	C	0.0236284	2.80027e-13	0.00323587	408112	ebi-a-GCST90002389	Lymphocyte percentage of white cells
6	42030878	rs12193078	TAF8	G	C	G	0.0271934	G	C	0.0271934	1.20005e-17	0.00318088	408112	ebi-a-GCST90002400	Plateletcrit
6	42030878	rs12193078	TAF8	G	C	G	0.0277349	G	C	0.0277349	3.58179e-15	0.00352452	349861	ukb-d-30180_irnt	Lymphocyte percentage
6	42030878	rs12193078	TAF8	G	C	G	0.0371703	G	C	0.0371703	1.69981e-31	0.00318397	408112	ebi-a-GCST90002388	Lymphocyte count
6	42030878	rs12193078	TAF8	G	C	G	0.0383829	G	C	0.0383829	1.3122e-33	0.00317683	395949	ebi-a-GCST90013982	Lymphocyte count (UKB data field 30120)
6	42030878	rs12193078	TAF8	G	C	G	-0.0185518	G	C	-0.0185518	7.00003e-09	0.00320387	408112	ebi-a-GCST90002382	Eosinophil percentage of white cells
6	42030878	rs12193078	TAF8	G	C	G	-0.0186644	G	C	-0.0186644	8.9e-09	0.00324562	408112	ebi-a-GCST90002399	Neutrophil percentage of white cells
6	42030878	rs12193078	TAF8	G	C	G	-0.0221619	G	C	-0.0221619	4.95427e-10	0.00356259	349861	ukb-d-30200_irnt	Neutrophill percentage
6	42037348	rs12201698	TAF8	C	T	C	0.0311	C	T	0.0311	4.61743e-26	0.0029	349856	ebi-a-GCST90018962	Lymphocyte count
6	42037348	rs12201698	TAF8	C	T	C	0.016434	C	T	0.016434	1.29999e-09	0.00280779	600968	ebi-a-GCST90028999	Platelet count
6	42037348	rs12201698	TAF8	C	T	C	0.017566	C	T	0.017566	7.39997e-10	0.002851	521592	ieu-b-31	monocyte cell count
6	42037348	rs12201698	TAF8	C	T	C	0.017566	C	T	0.017566	7.39997e-10	0.002851	521594	ebi-a-GCST90002340	Monocyte count
6	42037348	rs12201698	TAF8	C	T	C	0.018577	C	T	0.018577	4.16006e-11	0.002813	562241	ieu-b-30	white blood cell count
6	42037348	rs12201698	TAF8	C	T	C	0.018577	C	T	0.018577	4.16006e-11	0.002813	562243	ebi-a-GCST90002374	White blood cell count
6	42037348	rs12201698	TAF8	C	T	C	0.019057	C	T	0.019057	1.02991e-11	0.002799	542827	ebi-a-GCST90002357	Platelet count
6	42037348	rs12201698	TAF8	C	T	C	0.019937	C	T	0.019937	4.63724e-10	0.00319969	396621	ebi-a-GCST90013976	White blood cell leukocyte count (UKB data field 30000)
6	42037348	rs12201698	TAF8	C	T	C	0.034637	C	T	0.034637	2.84971e-33	0.00288	524921	ieu-b-32	lymphocyte cell count
6	42037348	rs12201698	TAF8	C	T	C	0.034637	C	T	0.034637	2.84971e-33	0.00288	524923	ebi-a-GCST90002316	Lymphocyte count
6	42037348	rs12201698	TAF8	C	T	C	0.035321	C	T	0.035321	1.29987e-33	0.00296799	509277	ebi-a-GCST90028994	White blood cell count (lymphocyte)
6	42037348	rs12201698	TAF8	C	T	C	0.0182748	C	T	0.0182748	1.40001e-10	0.00297389	503190	ebi-a-GCST90029003	White blood cell count
6	42037348	rs12201698	TAF8	C	T	C	0.0197653	C	T	0.0197653	4.49997e-10	0.00316939	408112	ebi-a-GCST90002402	Platelet count
6	42037348	rs12201698	TAF8	C	T	C	0.0204005	C	T	0.0204005	2.2489e-09	0.00341209	350471	ukb-d-30090_irnt	Platelet crit
6	42037348	rs12201698	TAF8	C	T	C	0.0207834	C	T	0.0207834	8.00018e-11	0.00319736	408112	ebi-a-GCST90002407	White blood cell count
6	42037348	rs12201698	TAF8	C	T	C	0.0235831	C	T	0.0235831	3.50026e-13	0.00324172	408112	ebi-a-GCST90002389	Lymphocyte percentage of white cells
6	42037348	rs12201698	TAF8	C	T	C	0.0274105	C	T	0.0274105	7.89951e-18	0.00318662	408112	ebi-a-GCST90002400	Plateletcrit
6	42037348	rs12201698	TAF8	C	T	C	0.0276334	C	T	0.0276334	5.04545e-15	0.00353091	349861	ukb-d-30180_irnt	Lymphocyte percentage
6	42037348	rs12201698	TAF8	C	T	C	0.0364184	C	T	0.0364184	1.78937e-24	0.00356667	349856	ukb-d-30120_irnt	Lymphocyte count
6	42037348	rs12201698	TAF8	C	T	C	0.0372685	C	T	0.0372685	1.50003e-31	0.00318972	408112	ebi-a-GCST90002388	Lymphocyte count
6	42037348	rs12201698	TAF8	C	T	C	0.0384877	C	T	0.0384877	1.15186e-33	0.00318268	395949	ebi-a-GCST90013982	Lymphocyte count (UKB data field 30120)
6	42037348	rs12201698	TAF8	C	T	C	-0.0185401	C	T	-0.0185401	7.59994e-09	0.00320965	408112	ebi-a-GCST90002382	Eosinophil percentage of white cells
6	42037348	rs12201698	TAF8	C	T	C	-0.0220849	C	T	-0.0220849	6.1038e-10	0.00356904	349861	ukb-d-30200_irnt	Neutrophill percentage
6	42040291	rs9381129	TAF8	T	C	T	0.0208	T	C	0.0208	4.52689e-11	0.0032	349856	ebi-a-GCST90018962	Lymphocyte count
6	42040291	rs9381129	TAF8	T	C	T	0.024748	T	C	0.024748	2.18022e-15	0.003118	523515	ieu-b-32	lymphocyte cell count
6	42040291	rs9381129	TAF8	T	C	T	0.024748	T	C	0.024748	2.18022e-15	0.003118	524923	ebi-a-GCST90002316	Lymphocyte count
6	42040291	rs9381129	TAF8	T	C	T	0.0260648	T	C	0.0260648	4.10015e-14	0.00344898	408112	ebi-a-GCST90002388	Lymphocyte count
6	42040291	rs9381129	TAF8	T	C	T	0.0265623	T	C	0.0265623	1.69981e-17	0.00320805	509277	ebi-a-GCST90028994	White blood cell count (lymphocyte)
6	42040291	rs9381129	TAF8	T	C	T	0.0268964	T	C	0.0268964	2.90001e-18	0.00322748	443762	ebi-a-GCST90025984	Lymphocyte count
6	42040291	rs9381129	TAF8	T	C	T	0.0272534	T	C	0.0272534	1.60731e-12	0.00385744	349856	ukb-d-30120_irnt	Lymphocyte count
6	42040291	rs9381129	TAF8	T	C	T	0.0291957	T	C	0.0291957	2.32541e-17	0.00344441	395949	ebi-a-GCST90013982	Lymphocyte count (UKB data field 30120)
6	42052815	rs78216089	TAF8	T	C	T	0.0214	T	C	0.0214	1.17501e-09	0.0035	349856	ebi-a-GCST90018962	Lymphocyte count
6	42052815	rs78216089	TAF8	T	C	T	0.03782	T	C	0.03782	1.15958e-17	0.00441961	350473	ukb-d-30040_irnt	Mean corpuscular volume
6	42052815	rs78216089	TAF8	T	C	T	0.022236	T	C	0.022236	2.61999e-10	0.003516	521590	ieu-b-31	monocyte cell count
6	42052815	rs78216089	TAF8	T	C	T	0.022236	T	C	0.022236	2.61999e-10	0.003516	521594	ebi-a-GCST90002340	Monocyte count
6	42052815	rs78216089	TAF8	T	C	T	0.023767	T	C	0.023767	2.26986e-11	0.003551	524919	ieu-b-32	lymphocyte cell count
6	42052815	rs78216089	TAF8	T	C	T	0.023767	T	C	0.023767	2.26986e-11	0.003551	524923	ebi-a-GCST90002316	Lymphocyte count
6	42052815	rs78216089	TAF8	T	C	T	0.033728	T	C	0.033728	3.54977e-21	0.003568	486823	ebi-a-GCST90002322	Mean corpuscular hemoglobin
6	42052815	rs78216089	TAF8	T	C	T	0.039153	T	C	0.039153	2.58601e-09	0.00657378	172433	ebi-a-GCST004602	Mean corpuscular volume
6	42052815	rs78216089	TAF8	T	C	T	0.043518	T	C	0.043518	5.73984e-38	0.003377	544127	ebi-a-GCST90002334	Mean corpuscular volume
6	42052815	rs78216089	TAF8	T	C	T	0.0231411	T	C	0.0231411	6.4003e-12	0.00366087	545193	ebi-a-GCST90028998	White blood cell count (monocyte)
6	42052815	rs78216089	TAF8	T	C	T	0.0231645	T	C	0.0231645	7.87916e-10	0.00376822	395949	ebi-a-GCST90013983	Monocyte count (UKB data field 30130)
6	42052815	rs78216089	TAF8	T	C	T	0.0260824	T	C	0.0260824	4.49987e-11	0.00396037	408112	ebi-a-GCST90002388	Lymphocyte count
6	42052815	rs78216089	TAF8	T	C	T	0.0262777	T	C	0.0262777	1.39991e-13	0.00368094	509277	ebi-a-GCST90028994	White blood cell count (lymphocyte)
6	42052815	rs78216089	TAF8	T	C	T	0.0263289	T	C	0.0263289	1.08233e-09	0.00431838	349856	ukb-d-30130_irnt	Monocyte count
6	42052815	rs78216089	TAF8	T	C	T	0.0263684	T	C	0.0263684	2.23429e-09	0.00440947	350472	ukb-d-30050_irnt	Mean corpuscular haemoglobin
6	42052815	rs78216089	TAF8	T	C	T	0.0265147	T	C	0.0265147	1.9002e-15	0.00339335	572863	ebi-a-GCST90028995	Mean corpuscular hemoglobin
6	42052815	rs78216089	TAF8	T	C	T	0.0284853	T	C	0.0284853	1.29533e-10	0.00443151	349856	ukb-d-30120_irnt	Lymphocyte count
6	42052815	rs78216089	TAF8	T	C	T	0.0295319	T	C	0.0295319	8.33105e-14	0.00395606	395949	ebi-a-GCST90013982	Lymphocyte count (UKB data field 30120)
6	42052815	rs78216089	TAF8	T	C	T	0.0298154	T	C	0.0298154	6.00067e-17	0.00362357	535537	ebi-a-GCST90028997	Mean sphered cell volume
6	42052815	rs78216089	TAF8	T	C	T	0.0322563	T	C	0.0322563	5.31863e-13	0.00446938	344729	ukb-d-30270_irnt	Mean sphered cell volume
6	42052815	rs78216089	TAF8	T	C	T	0.0328215	T	C	0.0328215	1.69981e-17	0.00385473	408112	ebi-a-GCST90002390	Mean corpuscular hemoglobin
6	42052815	rs78216089	TAF8	T	C	T	0.0348994	T	C	0.0348994	5.46764e-15	0.00446512	344728	ukb-d-30260_irnt	Mean reticulocyte volume
6	42052815	rs78216089	TAF8	T	C	T	0.0383752	T	C	0.0383752	3.40017e-22	0.00396165	408112	ebi-a-GCST90002396	Mean reticulocyte volume
6	42052815	rs78216089	TAF8	T	C	T	0.0386128	T	C	0.0386128	1.7108e-23	0.00386571	396624	ebi-a-GCST90013979	Mean corpuscular volume (UKB data field 30040)
6	42052815	rs78216089	TAF8	T	C	T	0.0396327	T	C	0.0396327	7.10068e-25	0.0038481	408112	ebi-a-GCST90002397	Mean spheric corpuscular volume
6	42052815	rs78216089	TAF8	T	C	T	0.0411022	T	C	0.0411022	3.59998e-27	0.00380734	408112	ebi-a-GCST90002392	Mean corpuscular volume
6	121757028	rs79597379	GJA1	T	C	T	0.112963	T	C	0.112963	8.60003e-33	0.00947175	436424	ukb-b-18103	Pulse rate, automated reading
6	121757028	rs79597379	GJA1	T	C	T	0.125672	T	C	0.125672	6.26181e-29	0.0112578	317756	ukb-a-3	Pulse rate automated reading
6	121757028	rs79597379	GJA1	T	C	T	0.141632	T	C	0.141632	1.50003e-18	0.0161197	151546	ukb-b-15892	Pulse rate
6	121757028	rs79597379	GJA1	T	C	T	0.163224	T	C	0.163224	5.05708e-18	0.018862	110153	ukb-a-363	Pulse rate
6	121757209	rs78125885	GJA1	G	A	G	0.112963	G	A	0.112963	8.69961e-33	0.00947243	436424	ukb-b-18103	Pulse rate, automated reading
6	121757209	rs78125885	GJA1	G	A	G	0.125683	G	A	0.125683	6.24453e-29	0.0112586	317756	ukb-a-3	Pulse rate automated reading
6	121757209	rs78125885	GJA1	G	A	G	0.141727	G	A	0.141727	1.50003e-18	0.016121	151546	ukb-b-15892	Pulse rate
6	121757209	rs78125885	GJA1	G	A	G	0.163259	G	A	0.163259	5.01072e-18	0.0188639	110153	ukb-a-363	Pulse rate
6	121762904	rs17083633	GJA1	C	T	C	0.9498	C	T	0.9498	1.89701e-10	0.1491	6568	ebi-a-GCST001969	Heart rate
6	121762904	rs17083633	GJA1	C	T	C	0.9498	C	T	0.9498	1.89701e-10	0.1491	79760	ieu-a-1056	Heart rate
6	121762904	rs17083633	GJA1	C	T	C	0.112784	C	T	0.112784	1.10002e-32	0.00947425	436424	ukb-b-18103	Pulse rate, automated reading
6	121762904	rs17083633	GJA1	C	T	C	0.125635	C	T	0.125635	6.99198e-29	0.0112645	317756	ukb-a-3	Pulse rate automated reading
6	121762904	rs17083633	GJA1	C	T	C	0.142305	C	T	0.142305	1.20005e-18	0.0161356	151546	ukb-b-15892	Pulse rate
6	121762904	rs17083633	GJA1	C	T	C	0.163628	C	T	0.163628	4.69245e-18	0.0188901	110153	ukb-a-363	Pulse rate
6	121763328	rs3805785	GJA1	T	A	T	0.9925	T	A	0.9925	1.15292e-12	0.1396	6568	ebi-a-GCST001969	Heart rate
6	121763328	rs3805785	GJA1	T	A	T	0.9925	T	A	0.9925	1.15292e-12	0.1396	84207	ieu-a-1056	Heart rate
6	121763328	rs3805785	GJA1	T	A	T	0.112748	T	A	0.112748	1.20005e-32	0.00947648	436424	ukb-b-18103	Pulse rate, automated reading
6	121763328	rs3805785	GJA1	T	A	T	0.125621	T	A	0.125621	7.2644e-29	0.0112666	317756	ukb-a-3	Pulse rate automated reading
6	121763328	rs3805785	GJA1	T	A	T	0.142019	T	A	0.142019	1.39991e-18	0.0161379	151546	ukb-b-15892	Pulse rate
6	121763328	rs3805785	GJA1	T	A	T	0.163156	T	A	0.163156	5.89658e-18	0.0188925	110153	ukb-a-363	Pulse rate
7	38022677	rs2122620	SFRP4	T	G	T	0.3216	T	G	0.3216	7.63607e-09	0.0557	NA	finn-b-M13_PLANTARFASC	Plantar fascial fibromatosis
7	38022677	rs2122620	SFRP4	T	G	T	0.4588	T	G	0.4588	4.54255e-39	0.0351	NA	finn-b-M13_FIBROBLASTIC	Fibroblastic disorders
7	38022677	rs2122620	SFRP4	T	G	T	0.5967	T	G	0.5967	7.78574e-41	0.0446	NA	finn-b-M13_DUPUTRYEN	Palmar fascial fibromatosis [Dupuytren]
7	38022677	rs2122620	SFRP4	T	G	T	0.0069593	T	G	0.0069593	1.24509e-87	0.000350607	361194	ukb-d-M13_DUPUTRYEN	Palmar fascial fibromatosis [Dupuytren]
7	38022677	rs2122620	SFRP4	T	G	T	0.0163419	T	G	0.0163419	5.00035e-11	0.00248697	461536	ukb-b-16881	Sitting height
7	38022677	rs2122620	SFRP4	T	G	T	0.00453326	T	G	0.00453326	1.2428e-51	0.000299819	337199	ukb-a-572	Diagnoses - main ICD10: M72 Fibroblastic disorders
7	38022677	rs2122620	SFRP4	T	G	T	0.00721599	T	G	0.00721599	4.43609e-87	0.000364715	361194	ukb-d-M13_FIBROBLASTIC	Fibroblastic disorders
7	38023400	rs117575966	SFRP4	G	A	G	0.3229	G	A	0.3229	5.85194e-09	0.0555	NA	finn-b-M13_PLANTARFASC	Plantar fascial fibromatosis
7	38023400	rs117575966	SFRP4	G	A	G	0.4536	G	A	0.4536	1.36113e-38	0.0349	NA	finn-b-M13_FIBROBLASTIC	Fibroblastic disorders
7	38023400	rs117575966	SFRP4	G	A	G	0.5903	G	A	0.5903	2.10814e-40	0.0444	NA	finn-b-M13_DUPUTRYEN	Palmar fascial fibromatosis [Dupuytren]
7	38023400	rs117575966	SFRP4	G	A	G	0.0149012	G	A	0.0149012	1.09999e-09	0.00244717	461536	ukb-b-16881	Sitting height
7	38023400	rs117575966	SFRP4	G	A	G	0.00447529	G	A	0.00447529	5.3765e-52	0.00029491	337199	ukb-a-572	Diagnoses - main ICD10: M72 Fibroblastic disorders
7	38023400	rs117575966	SFRP4	G	A	G	0.00699866	G	A	0.00699866	1.7358e-91	0.000344914	361194	ukb-d-M13_DUPUTRYEN	Palmar fascial fibromatosis [Dupuytren]
7	38023400	rs117575966	SFRP4	G	A	G	0.00724873	G	A	0.00724873	1.033e-90	0.000358793	361194	ukb-d-M13_FIBROBLASTIC	Fibroblastic disorders
7	38023613	rs117329120	SFRP4	C	T	C	0.323	C	T	0.323	5.79696e-09	0.0555	NA	finn-b-M13_PLANTARFASC	Plantar fascial fibromatosis
7	38023613	rs117329120	SFRP4	C	T	C	0.4537	C	T	0.4537	1.3369e-38	0.0349	NA	finn-b-M13_FIBROBLASTIC	Fibroblastic disorders
7	38023613	rs117329120	SFRP4	C	T	C	0.5903	C	T	0.5903	2.09122e-40	0.0444	NA	finn-b-M13_DUPUTRYEN	Palmar fascial fibromatosis [Dupuytren]
7	38023613	rs117329120	SFRP4	C	T	C	0.0149019	C	T	0.0149019	1.09999e-09	0.00244716	461536	ukb-b-16881	Sitting height
7	38023613	rs117329120	SFRP4	C	T	C	0.00447507	C	T	0.00447507	5.43501e-52	0.000294909	337199	ukb-a-572	Diagnoses - main ICD10: M72 Fibroblastic disorders
7	38023613	rs117329120	SFRP4	C	T	C	0.00699887	C	T	0.00699887	1.71199e-91	0.000344913	361194	ukb-d-M13_DUPUTRYEN	Palmar fascial fibromatosis [Dupuytren]
7	38023613	rs117329120	SFRP4	C	T	C	0.00724875	C	T	0.00724875	1.03062e-90	0.000358792	361194	ukb-d-M13_FIBROBLASTIC	Fibroblastic disorders
7	38024404	rs2044830	SFRP4	A	G	A	0.3231	A	G	0.3231	5.75003e-09	0.0555	NA	finn-b-M13_PLANTARFASC	Plantar fascial fibromatosis
7	38024404	rs2044830	SFRP4	A	G	A	0.4537	A	G	0.4537	1.3499e-38	0.0349	NA	finn-b-M13_FIBROBLASTIC	Fibroblastic disorders
7	38024404	rs2044830	SFRP4	A	G	A	0.5903	A	G	0.5903	2.13304e-40	0.0444	NA	finn-b-M13_DUPUTRYEN	Palmar fascial fibromatosis [Dupuytren]
7	38024404	rs2044830	SFRP4	A	G	A	0.0148719	A	G	0.0148719	1.2e-09	0.00244699	461536	ukb-b-16881	Sitting height
7	38024404	rs2044830	SFRP4	A	G	A	0.00447397	A	G	0.00447397	5.70033e-52	0.000294897	337199	ukb-a-572	Diagnoses - main ICD10: M72 Fibroblastic disorders
7	38024404	rs2044830	SFRP4	A	G	A	0.00699914	A	G	0.00699914	1.65577e-91	0.000344898	361194	ukb-d-M13_DUPUTRYEN	Palmar fascial fibromatosis [Dupuytren]
7	38024404	rs2044830	SFRP4	A	G	A	0.00724841	A	G	0.00724841	1.03181e-90	0.000358777	361194	ukb-d-M13_FIBROBLASTIC	Fibroblastic disorders
7	38024574	rs17171240	SFRP4	A	G	A	0.3233	A	G	0.3233	5.67806e-09	0.0555	NA	finn-b-M13_PLANTARFASC	Plantar fascial fibromatosis
7	38024574	rs17171240	SFRP4	A	G	A	0.4538	A	G	0.4538	1.32892e-38	0.0349	NA	finn-b-M13_FIBROBLASTIC	Fibroblastic disorders
7	38024574	rs17171240	SFRP4	A	G	A	0.5904	A	G	0.5904	2.1169e-40	0.0444	NA	finn-b-M13_DUPUTRYEN	Palmar fascial fibromatosis [Dupuytren]
7	38024574	rs17171240	SFRP4	A	G	A	0.014895	A	G	0.014895	1.09999e-09	0.00244685	461536	ukb-b-16881	Sitting height
7	38024574	rs17171240	SFRP4	A	G	A	0.00447288	A	G	0.00447288	5.95388e-52	0.000294881	337199	ukb-a-572	Diagnoses - main ICD10: M72 Fibroblastic disorders
7	38024574	rs17171240	SFRP4	A	G	A	0.00700014	A	G	0.00700014	1.523e-91	0.000344877	361194	ukb-d-M13_DUPUTRYEN	Palmar fascial fibromatosis [Dupuytren]
7	38024574	rs17171240	SFRP4	A	G	A	0.00724861	A	G	0.00724861	9.95864e-91	0.000358756	361194	ukb-d-M13_FIBROBLASTIC	Fibroblastic disorders
7	38026156	rs185883438	SFRP4	A	T	A	0.4347	A	T	0.4347	1.033e-31	0.0371	NA	finn-b-M13_FIBROBLASTIC	Fibroblastic disorders
7	38026156	rs185883438	SFRP4	A	T	A	0.5583	A	T	0.5583	2.09894e-32	0.0471	NA	finn-b-M13_DUPUTRYEN	Palmar fascial fibromatosis [Dupuytren]
7	38026156	rs185883438	SFRP4	A	T	A	0.0066388	A	T	0.0066388	3.02901e-76	0.00035917	361194	ukb-d-M13_DUPUTRYEN	Palmar fascial fibromatosis [Dupuytren]
7	38026156	rs185883438	SFRP4	A	T	A	0.00406521	A	T	0.00406521	6.2273e-40	0.00030733	337199	ukb-a-572	Diagnoses - main ICD10: M72 Fibroblastic disorders
7	38026156	rs185883438	SFRP4	A	T	A	0.00679843	A	T	0.00679843	6.01589e-74	0.000373627	361194	ukb-d-M13_FIBROBLASTIC	Fibroblastic disorders
7	44157825	rs3217964	POLD2	C	T	C	-0.0201	C	T	-0.0201	6.00399e-10	0.0035	33307	ebi-a-GCST90002243	Glycated hemoglobin levels
7	44157825	rs3217964	POLD2	C	T	C	-0.0205	C	T	-0.0205	3.13617e-18	0.0024	314916	ebi-a-GCST90018955	Glucose levels
7	44157825	rs3217964	POLD2	C	T	C	-0.01937	C	T	-0.01937	3.08603e-12	0.0027774	314916	ukb-d-30740_irnt	Glucose
7	44157825	rs3217964	POLD2	C	T	C	-0.03495	C	T	-0.03495	5.58496e-09	0.005997	NA	bbj-a-10	Blood sugar
7	44157825	rs3217964	POLD2	C	T	C	-0.0189685	C	T	-0.0189685	1.31311e-13	0.00256164	357580	ebi-a-GCST90014005	Glucose levels (UKB data field 30740)
7	129829875	rs73146712	TMEM209	C	T	C	-0.2372	C	T	-0.2372	3.63078e-16	0.0291	3301	prot-a-643	Carboxypeptidase A4
7	129834473	rs1488008	TMEM209	T	C	T	-0.2358	T	C	-0.2358	5.12861e-16	0.0291	3301	prot-a-643	Carboxypeptidase A4
10	70730197	rs17471610	DDX21	G	C	G	0.0216	G	C	0.0216	6.51778e-13	0.003	344182	ebi-a-GCST90018958	Hemoglobin A1c levels
10	70730197	rs17471610	DDX21	G	C	G	0.02696	G	C	0.02696	7.73036e-16	0.0033454	344182	ukb-d-30750_irnt	Glycated haemoglobin
10	70730197	rs17471610	DDX21	G	C	G	0.0292198	G	C	0.0292198	7.6542e-23	0.00296983	389889	ebi-a-GCST90014006	Glycated haemoglobin HbA1c levels (UKB data field 30750)
10	70730197	rs17471610	DDX21	G	C	G	0.0318628	G	C	0.0318628	2.29985e-27	0.00295582	437749	ebi-a-GCST90025974	Hemoglobin A1c levels
10	70730197	rs17471610	DDX21	G	C	G	-0.0355	G	C	-0.0355	9.89305e-09	0.0062	22504	ebi-a-GCST004076	Optic disc area
10	70730197	rs17471610	DDX21	G	C	G	-0.019398	G	C	-0.019398	1.33352e-12	0.00273556	336172	ukb-a-195	Sitting height
10	70730197	rs17471610	DDX21	G	C	G	-0.0154206	G	C	-0.0154206	5.60015e-16	0.00190425	461950	ukb-b-10787	Standing height
10	70730197	rs17471610	DDX21	G	C	G	-0.0173894	G	C	-0.0173894	1.69981e-15	0.00218445	461536	ukb-b-16881	Sitting height
10	70730197	rs17471610	DDX21	G	C	G	-0.0174797	G	C	-0.0174797	3.62493e-12	0.00251458	336474	ukb-a-389	Standing height
10	70730197	rs17471610	DDX21	G	C	G	-0.0215735	G	C	-0.0215735	3.19963e-20	0.00239781	458235	ebi-a-GCST90025949	Height
10	70730197	rs17471610	DDX21	G	C	G	-0.0217614	G	C	-0.0217614	1e-22	0.00228392	673878	ebi-a-GCST90029008	Height
10	70733935	rs34707685	DDX21	T	C	T	0.0217	T	C	0.0217	3.95913e-13	0.003	344182	ebi-a-GCST90018958	Hemoglobin A1c levels
10	70733935	rs34707685	DDX21	T	C	T	0.026939	T	C	0.026939	8.08723e-16	0.0033451	344182	ukb-d-30750_irnt	Glycated haemoglobin
10	70733935	rs34707685	DDX21	T	C	T	0.0292122	T	C	0.0292122	7.81448e-23	0.00296968	389889	ebi-a-GCST90014006	Glycated haemoglobin HbA1c levels (UKB data field 30750)
10	70733935	rs34707685	DDX21	T	C	T	-0.0358	T	C	-0.0358	8.08295e-09	0.0062	22504	ebi-a-GCST004076	Optic disc area
10	70733935	rs34707685	DDX21	T	C	T	-0.017482	T	C	-0.017482	3.5917e-12	0.00251444	336474	ukb-a-389	Standing height
10	70733935	rs34707685	DDX21	T	C	T	-0.0154353	T	C	-0.0154353	5.19996e-16	0.00190409	461950	ukb-b-10787	Standing height
10	70733935	rs34707685	DDX21	T	C	T	-0.0174027	T	C	-0.0174027	1.59993e-15	0.00218426	461536	ukb-b-16881	Sitting height
10	70733935	rs34707685	DDX21	T	C	T	-0.0193984	T	C	-0.0193984	1.32831e-12	0.00273541	336172	ukb-a-195	Sitting height
10	70733935	rs34707685	DDX21	T	C	T	-0.0217635	T	C	-0.0217635	9.70063e-23	0.00228372	673878	ebi-a-GCST90029008	Height
10	70736879	rs72803503	DDX21	C	A	C	0.0218	C	A	0.0218	3.19374e-13	0.003	344182	ebi-a-GCST90018958	Hemoglobin A1c levels
10	70736879	rs72803503	DDX21	C	A	C	0.026939	C	A	0.026939	8.08537e-16	0.0033451	344182	ukb-d-30750_irnt	Glycated haemoglobin
10	70736879	rs72803503	DDX21	C	A	C	0.0292117	C	A	0.0292117	7.82348e-23	0.00296966	389889	ebi-a-GCST90014006	Glycated haemoglobin HbA1c levels (UKB data field 30750)
10	70736879	rs72803503	DDX21	C	A	C	-0.0154343	C	A	-0.0154343	5.19996e-16	0.00190408	461950	ukb-b-10787	Standing height
10	70736879	rs72803503	DDX21	C	A	C	-0.0173847	C	A	-0.0173847	1.69981e-15	0.00218425	461536	ukb-b-16881	Sitting height
10	70736879	rs72803503	DDX21	C	A	C	-0.0174786	C	A	-0.0174786	3.62493e-12	0.00251442	336474	ukb-a-389	Standing height
10	70736879	rs72803503	DDX21	C	A	C	-0.0193611	C	A	-0.0193611	1.46521e-12	0.00273538	336172	ukb-a-195	Sitting height
10	70736879	rs72803503	DDX21	C	A	C	-0.0217709	C	A	-0.0217709	9.30037e-23	0.00228371	673878	ebi-a-GCST90029008	Height
10	70737972	rs12778685	DDX21	C	T	C	0.0218	C	T	0.0218	3.04789e-13	0.003	344182	ebi-a-GCST90018958	Hemoglobin A1c levels
10	70737972	rs12778685	DDX21	C	T	C	0.02696	C	T	0.02696	7.68953e-16	0.0033452	344182	ukb-d-30750_irnt	Glycated haemoglobin
10	70737972	rs12778685	DDX21	C	T	C	0.029223	C	T	0.029223	7.55266e-23	0.00296974	389889	ebi-a-GCST90014006	Glycated haemoglobin HbA1c levels (UKB data field 30750)
10	70737972	rs12778685	DDX21	C	T	C	-0.015443	C	T	-0.015443	5.10035e-16	0.00190414	461950	ukb-b-10787	Standing height
10	70737972	rs12778685	DDX21	C	T	C	-0.0173868	C	T	-0.0173868	1.69981e-15	0.00218433	461536	ukb-b-16881	Sitting height
10	70737972	rs12778685	DDX21	C	T	C	-0.0174959	C	T	-0.0174959	3.45541e-12	0.00251448	336474	ukb-a-389	Standing height
10	70737972	rs12778685	DDX21	C	T	C	-0.0193716	C	T	-0.0193716	1.42659e-12	0.00273544	336172	ukb-a-195	Sitting height
10	70737972	rs12778685	DDX21	C	T	C	-0.0217724	C	T	-0.0217724	9.20026e-23	0.00228379	673878	ebi-a-GCST90029008	Height
10	70740091	rs7907661	DDX21	A	G	A	0.0216	A	G	0.0216	6.2647e-13	0.003	344182	ebi-a-GCST90018958	Hemoglobin A1c levels
10	70740091	rs7907661	DDX21	A	G	A	0.02694	A	G	0.02694	8.08165e-16	0.0033452	344182	ukb-d-30750_irnt	Glycated haemoglobin
10	70740091	rs7907661	DDX21	A	G	A	0.0292147	A	G	0.0292147	7.76962e-23	0.00296975	389889	ebi-a-GCST90014006	Glycated haemoglobin HbA1c levels (UKB data field 30750)
10	70740091	rs7907661	DDX21	A	G	A	-0.0154141	A	G	-0.0154141	5.70033e-16	0.00190416	461950	ukb-b-10787	Standing height
10	70740091	rs7907661	DDX21	A	G	A	-0.0173956	A	G	-0.0173956	1.69981e-15	0.00218435	461536	ukb-b-16881	Sitting height
10	70740091	rs7907661	DDX21	A	G	A	-0.0174849	A	G	-0.0174849	3.56697e-12	0.00251451	336474	ukb-a-389	Standing height
10	70740091	rs7907661	DDX21	A	G	A	-0.0194062	A	G	-0.0194062	1.30317e-12	0.00273548	336172	ukb-a-195	Sitting height
10	70740091	rs7907661	DDX21	A	G	A	-0.0217455	A	G	-0.0217455	1.10002e-22	0.00228381	673878	ebi-a-GCST90029008	Height
10	70884514	rs61868341	VPS26A	G	A	G	0.0238	G	A	0.0238	4.9545e-19	0.0027	344182	ebi-a-GCST90018958	Hemoglobin A1c levels
10	70884514	rs61868341	VPS26A	G	A	G	0.024333	G	A	0.024333	1.66571e-19	0.0026936	344182	ukb-d-30750_irnt	Glycated haemoglobin
10	70884514	rs61868341	VPS26A	G	A	G	0.0262035	G	A	0.0262035	4.1639e-28	0.00238381	389889	ebi-a-GCST90014006	Glycated haemoglobin HbA1c levels (UKB data field 30750)
10	70884514	rs61868341	VPS26A	G	A	G	-0.012483	G	A	-0.012483	2.30001e-09	0.00230404	535537	ebi-a-GCST90028997	Mean sphered cell volume
10	70884514	rs61868341	VPS26A	G	A	G	-0.012943	G	A	-0.012943	6.20998e-09	0.002226	524918	ieu-b-32	lymphocyte cell count
10	70884514	rs61868341	VPS26A	G	A	G	-0.012943	G	A	-0.012943	6.20998e-09	0.002226	524923	ebi-a-GCST90002316	Lymphocyte count
10	70884514	rs61868341	VPS26A	G	A	G	-0.0114987	G	A	-0.0114987	2.90001e-09	0.00193586	434576	ukb-b-1431	Place of birth in UK - north co-ordinate
10	70884514	rs61868341	VPS26A	G	A	G	-0.0145345	G	A	-0.0145345	5.19996e-09	0.00248909	408112	ebi-a-GCST90002388	Lymphocyte count
10	70890541	rs55955823	VPS26A	C	T	C	0.0238	C	T	0.0238	4.22474e-19	0.0027	344182	ebi-a-GCST90018958	Hemoglobin A1c levels
10	70890541	rs55955823	VPS26A	C	T	C	0.024377	C	T	0.024377	1.40378e-19	0.0026928	344182	ukb-d-30750_irnt	Glycated haemoglobin
10	70890541	rs55955823	VPS26A	C	T	C	0.0262459	C	T	0.0262459	3.31436e-28	0.00238321	389889	ebi-a-GCST90014006	Glycated haemoglobin HbA1c levels (UKB data field 30750)
10	70890541	rs55955823	VPS26A	C	T	C	-0.013028	C	T	-0.013028	4.88e-09	0.002225	524920	ieu-b-32	lymphocyte cell count
10	70890541	rs55955823	VPS26A	C	T	C	-0.013028	C	T	-0.013028	4.88e-09	0.002225	524923	ebi-a-GCST90002316	Lymphocyte count
10	70890541	rs55955823	VPS26A	C	T	C	-0.014584	C	T	-0.014584	4.60002e-09	0.00248843	408112	ebi-a-GCST90002388	Lymphocyte count
10	70890541	rs55955823	VPS26A	C	T	C	-0.0115001	C	T	-0.0115001	2.80001e-09	0.00193537	434576	ukb-b-1431	Place of birth in UK - north co-ordinate
10	70890541	rs55955823	VPS26A	C	T	C	-0.0125777	C	T	-0.0125777	1.7e-09	0.00230346	535537	ebi-a-GCST90028997	Mean sphered cell volume
10	70902716	rs11813816	VPS26A	A	G	A	0.0243	A	G	0.0243	2.30781e-19	0.0027	344182	ebi-a-GCST90018958	Hemoglobin A1c levels
10	70902716	rs11813816	VPS26A	A	G	A	0.024874	A	G	0.024874	7.26942e-20	0.0027262	344182	ukb-d-30750_irnt	Glycated haemoglobin
10	70902716	rs11813816	VPS26A	A	G	A	0.0261354	A	G	0.0261354	2.39718e-27	0.00241254	389889	ebi-a-GCST90014006	Glycated haemoglobin HbA1c levels (UKB data field 30750)
10	70902716	rs11813816	VPS26A	A	G	A	-0.013496	A	G	-0.013496	2.13e-09	0.002252	524918	ieu-b-32	lymphocyte cell count
10	70902716	rs11813816	VPS26A	A	G	A	-0.013496	A	G	-0.013496	2.13e-09	0.002252	524923	ebi-a-GCST90002316	Lymphocyte count
10	70902716	rs11813816	VPS26A	A	G	A	-0.0114668	A	G	-0.0114668	4.90004e-09	0.00195947	434576	ukb-b-1431	Place of birth in UK - north co-ordinate
10	70902716	rs11813816	VPS26A	A	G	A	-0.0151621	A	G	-0.0151621	1.79999e-09	0.0025196	408112	ebi-a-GCST90002388	Lymphocyte count
10	70903844	rs11814302	VPS26A	G	C	G	0.024	G	C	0.024	3.19669e-19	0.0027	344182	ebi-a-GCST90018958	Hemoglobin A1c levels
10	70903844	rs11814302	VPS26A	G	C	G	0.024608	G	C	0.024608	1.024e-19	0.0027081	344182	ukb-d-30750_irnt	Glycated haemoglobin
10	70903844	rs11814302	VPS26A	G	C	G	0.0261143	G	C	0.0261143	1.18195e-27	0.00239631	389889	ebi-a-GCST90014006	Glycated haemoglobin HbA1c levels (UKB data field 30750)
10	70903844	rs11814302	VPS26A	G	C	G	-0.012982	G	C	-0.012982	6.62003e-09	0.002236	524923	ebi-a-GCST90002316	Lymphocyte count
10	70903844	rs11814302	VPS26A	G	C	G	-0.0114489	G	C	-0.0114489	4e-09	0.0019463	434576	ukb-b-1431	Place of birth in UK - north co-ordinate
10	70903844	rs11814302	VPS26A	G	C	G	-0.0145367	G	C	-0.0145367	6.29999e-09	0.00250269	408112	ebi-a-GCST90002388	Lymphocyte count
10	70944798	rs35773981	SUPV3L1	C	T	C	0.024	C	T	0.024	3.30826e-19	0.0027	344182	ebi-a-GCST90018958	Hemoglobin A1c levels
10	70944798	rs35773981	SUPV3L1	C	T	C	0.02461	C	T	0.02461	1.06586e-19	0.0027096	344182	ukb-d-30750_irnt	Glycated haemoglobin
10	70944798	rs35773981	SUPV3L1	C	T	C	0.0262829	C	T	0.0262829	5.92379e-28	0.00239799	389889	ebi-a-GCST90014006	Glycated haemoglobin HbA1c levels (UKB data field 30750)
10	70944798	rs35773981	SUPV3L1	C	T	C	-0.01363	C	T	-0.01363	1.12001e-09	0.002236	524921	ieu-b-32	lymphocyte cell count
10	70944798	rs35773981	SUPV3L1	C	T	C	-0.01363	C	T	-0.01363	1.12001e-09	0.002236	524923	ebi-a-GCST90002316	Lymphocyte count
10	70944798	rs35773981	SUPV3L1	C	T	C	-0.015227	C	T	-0.015227	1.2e-09	0.00250405	408112	ebi-a-GCST90002388	Lymphocyte count
10	70944798	rs35773981	SUPV3L1	C	T	C	-0.0115027	C	T	-0.0115027	3.50002e-09	0.00194743	434576	ukb-b-1431	Place of birth in UK - north co-ordinate
10	70944798	rs35773981	SUPV3L1	C	T	C	-0.0128713	C	T	-0.0128713	1.2e-09	0.00231812	535537	ebi-a-GCST90028997	Mean sphered cell volume
10	121652694	rs34042360	MCMBP	T	A	T	-0.0291444	T	A	-0.0291444	7.79992e-10	0.00473958	408112	ebi-a-GCST90002396	Mean reticulocyte volume
10	121652694	rs34042360	MCMBP	T	A	T	-0.0305771	T	A	-0.0305771	3.50026e-11	0.00461697	408112	ebi-a-GCST90002397	Mean spheric corpuscular volume
10	121656067	rs35225459	MCMBP	A	G	A	-0.030721	A	G	-0.030721	2.90001e-11	0.00461752	408112	ebi-a-GCST90002397	Mean spheric corpuscular volume
10	121656067	rs35225459	MCMBP	A	G	A	-0.0292872	A	G	-0.0292872	6.49995e-10	0.00474012	408112	ebi-a-GCST90002396	Mean reticulocyte volume
10	121657558	rs12761158	SEC23IP	G	A	G	-0.0290701	G	A	-0.0290701	8.60003e-10	0.00473915	408112	ebi-a-GCST90002396	Mean reticulocyte volume
10	121657558	rs12761158	SEC23IP	G	A	G	-0.0305313	G	A	-0.0305313	3.80014e-11	0.00461656	408112	ebi-a-GCST90002397	Mean spheric corpuscular volume
10	121659077	rs35019752	SEC23IP	A	T	A	-0.0290672	A	T	-0.0290672	8.60003e-10	0.00473913	408112	ebi-a-GCST90002396	Mean reticulocyte volume
10	121659077	rs35019752	SEC23IP	A	T	A	-0.0305304	A	T	-0.0305304	3.80014e-11	0.00461653	408112	ebi-a-GCST90002397	Mean spheric corpuscular volume
10	121659612	rs34038604	SEC23IP	T	G	T	-0.0290922	T	G	-0.0290922	8.30004e-10	0.00473909	408112	ebi-a-GCST90002396	Mean reticulocyte volume
10	121659612	rs34038604	SEC23IP	T	G	T	-0.0305634	T	G	-0.0305634	3.59998e-11	0.0046165	408112	ebi-a-GCST90002397	Mean spheric corpuscular volume
10	121659707	rs71482899	SEC23IP	G	A	G	-0.0290912	G	A	-0.0290912	8.30004e-10	0.00473909	408112	ebi-a-GCST90002396	Mean reticulocyte volume
10	121659707	rs71482899	SEC23IP	G	A	G	-0.0305628	G	A	-0.0305628	3.59998e-11	0.00461649	408112	ebi-a-GCST90002397	Mean spheric corpuscular volume
10	121660326	rs71482902	SEC23IP	T	C	T	-0.0290901	T	C	-0.0290901	8.30004e-10	0.00473907	408112	ebi-a-GCST90002396	Mean reticulocyte volume
10	121660326	rs71482902	SEC23IP	T	C	T	-0.0305633	T	C	-0.0305633	3.59998e-11	0.00461648	408112	ebi-a-GCST90002397	Mean spheric corpuscular volume
10	121660709	rs61870591	SEC23IP	T	C	T	-0.0291213	T	C	-0.0291213	8e-10	0.00473981	408112	ebi-a-GCST90002396	Mean reticulocyte volume
10	121660709	rs61870591	SEC23IP	T	C	T	-0.0306612	T	C	-0.0306612	3.10027e-11	0.00461719	408112	ebi-a-GCST90002397	Mean spheric corpuscular volume
10	121664714	rs35241512	SEC23IP	A	G	A	-0.0295332	A	G	-0.0295332	4.70002e-10	0.00474099	408112	ebi-a-GCST90002396	Mean reticulocyte volume
10	121664714	rs35241512	SEC23IP	A	G	A	-0.0310273	A	G	-0.0310273	1.80011e-11	0.00461837	408112	ebi-a-GCST90002397	Mean spheric corpuscular volume
10	121668501	rs3740569	SEC23IP	A	C	A	-0.0292797	A	C	-0.0292797	6.49995e-10	0.00473901	408112	ebi-a-GCST90002396	Mean reticulocyte volume
10	121668501	rs3740569	SEC23IP	A	C	A	-0.0306602	A	C	-0.0306602	3.10027e-11	0.00461642	408112	ebi-a-GCST90002397	Mean spheric corpuscular volume
10	121668656	rs3740570	SEC23IP	G	T	G	-0.0258681	G	T	-0.0258681	1.2e-09	0.00442218	436944	ebi-a-GCST90025975	Mean reticulocyte volume
10	121668656	rs3740570	SEC23IP	G	T	G	-0.0266151	G	T	-0.0266151	1.2e-09	0.00427878	437736	ebi-a-GCST90025976	Mean sphered cell volume
10	121668656	rs3740570	SEC23IP	G	T	G	-0.0293333	G	T	-0.0293333	6.1e-10	0.0047398	408112	ebi-a-GCST90002396	Mean reticulocyte volume
10	121668656	rs3740570	SEC23IP	G	T	G	-0.0307851	G	T	-0.0307851	2.60016e-11	0.00461719	408112	ebi-a-GCST90002397	Mean spheric corpuscular volume
10	121669997	rs4388794	SEC23IP	A	T	A	-0.0292744	A	T	-0.0292744	6.49995e-10	0.00473902	408112	ebi-a-GCST90002396	Mean reticulocyte volume
10	121669997	rs4388794	SEC23IP	A	T	A	-0.0306362	A	T	-0.0306362	3.19963e-11	0.00461643	408112	ebi-a-GCST90002397	Mean spheric corpuscular volume
10	121671651	rs17099368	SEC23IP	C	T	C	-0.030548	C	T	-0.030548	3.59998e-11	0.00461596	408112	ebi-a-GCST90002397	Mean spheric corpuscular volume
10	121671651	rs17099368	SEC23IP	C	T	C	-0.0254765	C	T	-0.0254765	1.6e-09	0.00437714	436944	ebi-a-GCST90025975	Mean reticulocyte volume
10	121671651	rs17099368	SEC23IP	C	T	C	-0.0264372	C	T	-0.0264372	1.2e-09	0.00423531	437736	ebi-a-GCST90025976	Mean sphered cell volume
10	121671651	rs17099368	SEC23IP	C	T	C	-0.0291932	C	T	-0.0291932	7.19996e-10	0.00473856	408112	ebi-a-GCST90002396	Mean reticulocyte volume
10	121672920	rs34572248	SEC23IP	A	T	A	-0.0289976	A	T	-0.0289976	1.09999e-09	0.0047544	408112	ebi-a-GCST90002396	Mean reticulocyte volume
10	121672920	rs34572248	SEC23IP	A	T	A	-0.0305974	A	T	-0.0305974	3.90032e-11	0.00463124	408112	ebi-a-GCST90002397	Mean spheric corpuscular volume
10	121674000	rs34233178	SEC23IP	G	A	G	-0.029202	G	A	-0.029202	7.19996e-10	0.00473867	408112	ebi-a-GCST90002396	Mean reticulocyte volume
10	121674000	rs34233178	SEC23IP	G	A	G	-0.0305624	G	A	-0.0305624	3.59998e-11	0.00461607	408112	ebi-a-GCST90002397	Mean spheric corpuscular volume
10	121674010	rs35862750	SEC23IP	G	A	G	-0.029211	G	A	-0.029211	7.10003e-10	0.0047391	408112	ebi-a-GCST90002396	Mean reticulocyte volume
10	121674010	rs35862750	SEC23IP	G	A	G	-0.030546	G	A	-0.030546	3.69999e-11	0.00461648	408112	ebi-a-GCST90002397	Mean spheric corpuscular volume
10	121675880	rs34675826	SEC23IP	T	C	T	-0.0291917	T	C	-0.0291917	7.29995e-10	0.00473881	408112	ebi-a-GCST90002396	Mean reticulocyte volume
10	121675880	rs34675826	SEC23IP	T	C	T	-0.0305649	T	C	-0.0305649	3.59998e-11	0.0046162	408112	ebi-a-GCST90002397	Mean spheric corpuscular volume
10	121680142	rs2271125	SEC23IP	T	C	T	-0.0292452	T	C	-0.0292452	6.80002e-10	0.00473892	408112	ebi-a-GCST90002396	Mean reticulocyte volume
10	121680142	rs2271125	SEC23IP	T	C	T	-0.0305973	T	C	-0.0305973	3.40017e-11	0.00461631	408112	ebi-a-GCST90002397	Mean spheric corpuscular volume
10	121680359	rs2271123	SEC23IP	G	A	G	-0.026848	G	A	-0.026848	5e-10	0.00448552	436944	ebi-a-GCST90025975	Mean reticulocyte volume
10	121680359	rs2271123	SEC23IP	G	A	G	-0.0276466	G	A	-0.0276466	5.39995e-10	0.0043403	437736	ebi-a-GCST90025976	Mean sphered cell volume
10	121680359	rs2271123	SEC23IP	G	A	G	-0.0292035	G	A	-0.0292035	7.19996e-10	0.00473898	408112	ebi-a-GCST90002396	Mean reticulocyte volume
10	121680359	rs2271123	SEC23IP	G	A	G	-0.0305534	G	A	-0.0305534	3.59998e-11	0.00461637	408112	ebi-a-GCST90002397	Mean spheric corpuscular volume
10	121681422	rs59633270	SEC23IP	G	A	G	-0.0292167	G	A	-0.0292167	7.00003e-10	0.00473903	408112	ebi-a-GCST90002396	Mean reticulocyte volume
10	121681422	rs59633270	SEC23IP	G	A	G	-0.0305611	G	A	-0.0305611	3.59998e-11	0.00461641	408112	ebi-a-GCST90002397	Mean spheric corpuscular volume
10	121682441	rs12771637	SEC23IP	C	T	C	-0.0292069	C	T	-0.0292069	7.10003e-10	0.00473908	408112	ebi-a-GCST90002396	Mean reticulocyte volume
10	121682441	rs12771637	SEC23IP	C	T	C	-0.0305742	C	T	-0.0305742	3.50026e-11	0.00461646	408112	ebi-a-GCST90002397	Mean spheric corpuscular volume
10	121685559	rs12771873	SEC23IP	A	G	A	-0.0256714	A	G	-0.0256714	1.5e-09	0.0043897	436944	ebi-a-GCST90025975	Mean reticulocyte volume
10	121685559	rs12771873	SEC23IP	A	G	A	-0.0268817	A	G	-0.0268817	8e-10	0.00424748	437736	ebi-a-GCST90025976	Mean sphered cell volume
10	121685559	rs12771873	SEC23IP	A	G	A	-0.0291451	A	G	-0.0291451	7.79992e-10	0.00473931	408112	ebi-a-GCST90002396	Mean reticulocyte volume
10	121685559	rs12771873	SEC23IP	A	G	A	-0.0305198	A	G	-0.0305198	3.80014e-11	0.0046167	408112	ebi-a-GCST90002397	Mean spheric corpuscular volume
10	121685895	rs35659548	SEC23IP	G	A	G	-0.0289237	G	A	-0.0289237	7.10003e-10	0.00469232	408112	ebi-a-GCST90002396	Mean reticulocyte volume
10	121685895	rs35659548	SEC23IP	G	A	G	-0.0298402	G	A	-0.0298402	6.59933e-11	0.0045708	408112	ebi-a-GCST90002397	Mean spheric corpuscular volume
10	121686228	rs34409912	SEC23IP	C	T	C	-0.029191	C	T	-0.029191	7.29995e-10	0.00473925	408112	ebi-a-GCST90002396	Mean reticulocyte volume
10	121686228	rs34409912	SEC23IP	C	T	C	-0.0305663	C	T	-0.0305663	3.59998e-11	0.00461663	408112	ebi-a-GCST90002397	Mean spheric corpuscular volume
10	121686714	rs17099382	SEC23IP	A	G	A	-0.0291742	A	G	-0.0291742	7.39997e-10	0.00473888	408112	ebi-a-GCST90002396	Mean reticulocyte volume
10	121686714	rs17099382	SEC23IP	A	G	A	-0.0306231	A	G	-0.0306231	3.29989e-11	0.00461631	408112	ebi-a-GCST90002397	Mean spheric corpuscular volume
10	121687420	rs12780763	SEC23IP	C	G	C	-0.0292057	C	G	-0.0292057	7.19996e-10	0.00473929	408112	ebi-a-GCST90002396	Mean reticulocyte volume
10	121687420	rs12780763	SEC23IP	C	G	C	-0.0305736	C	G	-0.0305736	3.50026e-11	0.00461667	408112	ebi-a-GCST90002397	Mean spheric corpuscular volume
10	121692152	rs2279941	SEC23IP	C	A	C	-0.030544	C	A	-0.030544	3.69999e-11	0.00461724	408112	ebi-a-GCST90002397	Mean spheric corpuscular volume
10	121692152	rs2279941	SEC23IP	C	A	C	-0.0291878	C	A	-0.0291878	7.39997e-10	0.00473985	408112	ebi-a-GCST90002396	Mean reticulocyte volume
10	121692777	rs2279940	SEC23IP	G	A	G	-0.0291584	G	A	-0.0291584	7.69999e-10	0.0047406	408112	ebi-a-GCST90002396	Mean reticulocyte volume
10	121692777	rs2279940	SEC23IP	G	A	G	-0.0304961	G	A	-0.0304961	4.00037e-11	0.00461796	408112	ebi-a-GCST90002397	Mean spheric corpuscular volume
10	121693020	rs2279939	SEC23IP	A	G	A	-0.0291661	A	G	-0.0291661	7.69999e-10	0.00474119	408112	ebi-a-GCST90002396	Mean reticulocyte volume
10	121693020	rs2279939	SEC23IP	A	G	A	-0.0305653	A	G	-0.0305653	3.59998e-11	0.00461852	408112	ebi-a-GCST90002397	Mean spheric corpuscular volume
10	121693246	rs34826964	SEC23IP	G	A	G	-0.030558	G	A	-0.030558	3.69999e-11	0.00461798	408112	ebi-a-GCST90002397	Mean spheric corpuscular volume
10	121693246	rs34826964	SEC23IP	G	A	G	-0.0291748	G	A	-0.0291748	7.49998e-10	0.00474063	408112	ebi-a-GCST90002396	Mean reticulocyte volume
10	121693664	rs34112569	SEC23IP	A	G	A	-0.030597	A	G	-0.030597	3.40017e-11	0.00461742	408112	ebi-a-GCST90002397	Mean spheric corpuscular volume
10	121693664	rs34112569	SEC23IP	A	G	A	-0.0292416	A	G	-0.0292416	6.90001e-10	0.0047401	408112	ebi-a-GCST90002396	Mean reticulocyte volume
10	121694150	rs3847493	SEC23IP	G	C	G	-0.0291599	G	C	-0.0291599	7.69999e-10	0.00474069	408112	ebi-a-GCST90002396	Mean reticulocyte volume
10	121694150	rs3847493	SEC23IP	G	C	G	-0.0305246	G	C	-0.0305246	3.80014e-11	0.00461804	408112	ebi-a-GCST90002397	Mean spheric corpuscular volume
10	121695024	rs3847494	SEC23IP	A	G	A	-0.0289331	A	G	-0.0289331	1.09999e-09	0.00474261	408112	ebi-a-GCST90002396	Mean reticulocyte volume
10	121695024	rs3847494	SEC23IP	A	G	A	-0.0305233	A	G	-0.0305233	3.90032e-11	0.00461984	408112	ebi-a-GCST90002397	Mean spheric corpuscular volume
10	121695307	rs35528843	SEC23IP	G	A	G	-0.030531	G	A	-0.030531	3.80014e-11	0.00461835	408112	ebi-a-GCST90002397	Mean spheric corpuscular volume
10	121695307	rs35528843	SEC23IP	G	A	G	-0.0291817	G	A	-0.0291817	7.49998e-10	0.00474101	408112	ebi-a-GCST90002396	Mean reticulocyte volume
10	121695460	rs34193663	SEC23IP	T	G	T	-0.0291734	T	G	-0.0291734	7.59994e-10	0.00474103	408112	ebi-a-GCST90002396	Mean reticulocyte volume
10	121695460	rs34193663	SEC23IP	T	G	T	-0.0305439	T	G	-0.0305439	3.80014e-11	0.00461837	408112	ebi-a-GCST90002397	Mean spheric corpuscular volume
10	121699523	rs9787570	SEC23IP	T	A	T	-0.0291497	T	A	-0.0291497	7.90005e-10	0.00474167	408112	ebi-a-GCST90002396	Mean reticulocyte volume
10	121699523	rs9787570	SEC23IP	T	A	T	-0.0304999	T	A	-0.0304999	4.00037e-11	0.00461899	408112	ebi-a-GCST90002397	Mean spheric corpuscular volume
10	121700136	rs35177417	SEC23IP	G	A	G	-0.0291735	G	A	-0.0291735	7.59994e-10	0.00474197	408112	ebi-a-GCST90002396	Mean reticulocyte volume
10	121700136	rs35177417	SEC23IP	G	A	G	-0.0304712	G	A	-0.0304712	4.19952e-11	0.00461928	408112	ebi-a-GCST90002397	Mean spheric corpuscular volume
10	121700201	rs71484605	SEC23IP	A	T	A	-0.0290675	A	T	-0.0290675	8.70001e-10	0.0047411	408112	ebi-a-GCST90002396	Mean reticulocyte volume
10	121700201	rs71484605	SEC23IP	A	T	A	-0.0304068	A	T	-0.0304068	4.60045e-11	0.00461844	408112	ebi-a-GCST90002397	Mean spheric corpuscular volume
10	121700959	rs61868001	SEC23IP	C	T	C	-0.0291218	C	T	-0.0291218	8.10009e-10	0.00474048	408112	ebi-a-GCST90002396	Mean reticulocyte volume
10	121700959	rs61868001	SEC23IP	C	T	C	-0.0304271	C	T	-0.0304271	4.40048e-11	0.00461782	408112	ebi-a-GCST90002397	Mean spheric corpuscular volume
10	121701486	rs41287950	SEC23IP	T	C	T	-0.0291228	T	C	-0.0291228	8.10009e-10	0.00474059	408112	ebi-a-GCST90002396	Mean reticulocyte volume
10	121701486	rs41287950	SEC23IP	T	C	T	-0.0304381	T	C	-0.0304381	4.40048e-11	0.00461793	408112	ebi-a-GCST90002397	Mean spheric corpuscular volume
10	121701786	rs3847495	SEC23IP	G	T	G	-0.0291192	G	T	-0.0291192	8.10009e-10	0.00474062	408112	ebi-a-GCST90002396	Mean reticulocyte volume
10	121701786	rs3847495	SEC23IP	G	T	G	-0.0304264	G	T	-0.0304264	4.40048e-11	0.00461796	408112	ebi-a-GCST90002397	Mean spheric corpuscular volume
10	121702010	rs4445563	SEC23IP	G	A	G	-0.0291079	G	A	-0.0291079	8.30004e-10	0.0047407	408112	ebi-a-GCST90002396	Mean reticulocyte volume
10	121702010	rs4445563	SEC23IP	G	A	G	-0.0304369	G	A	-0.0304369	4.40048e-11	0.00461803	408112	ebi-a-GCST90002397	Mean spheric corpuscular volume
10	126679510	rs75940661	ZRANB1	G	A	G	-0.0204837	G	A	-0.0204837	6.4251e-09	0.00352844	389608	ebi-a-GCST90013998	Urea levels (UKB data field 30670)
10	126685539	rs72828985	CTBP2	A	G	A	-0.0128774	A	G	-0.0128774	7.39997e-09	0.00230869	NA	ieu-b-5107	Comparative body size at age 10, Males and Females
10	126687613	rs72828993	CTBP2	C	T	C	-0.0128581	C	T	-0.0128581	8.60003e-09	0.00231288	NA	ieu-b-5107	Comparative body size at age 10, Males and Females
10	126711259	rs3781417	CTBP2	G	A	G	-0.0133638	G	A	-0.0133638	1e-09	0.0021897	261055	ebi-a-GCST006098	Vigorous physical activity
10	126713026	rs72830849	CTBP2	G	A	G	-0.0134222	G	A	-0.0134222	7.19996e-10	0.00217842	261055	ebi-a-GCST006098	Vigorous physical activity
10	126714169	rs72830850	CTBP2	T	C	T	-0.0132731	T	C	-0.0132731	1e-09	0.00217532	261055	ebi-a-GCST006098	Vigorous physical activity
10	126718244	rs72830857	CTBP2	T	C	T	-0.0132756	T	C	-0.0132756	1.09999e-09	0.00217689	261055	ebi-a-GCST006098	Vigorous physical activity
10	126721819	rs3824795	MIR4296	A	C	A	-0.0134587	A	C	-0.0134587	1e-09	0.00220467	261055	ebi-a-GCST006098	Vigorous physical activity
10	126722149	rs3781397	MIR4296	G	C	G	-0.0129902	G	C	-0.0129902	2.39999e-09	0.00217645	261055	ebi-a-GCST006098	Vigorous physical activity
10	126722453	rs11595737	MIR4296	T	C	T	-0.0129912	T	C	-0.0129912	2.39999e-09	0.00217672	261055	ebi-a-GCST006098	Vigorous physical activity
10	126723939	rs1078597	MIR4296	A	G	A	-0.0130454	A	G	-0.0130454	2e-09	0.00217573	261055	ebi-a-GCST006098	Vigorous physical activity
10	126726979	rs3824793	CTBP2	T	C	T	-0.0129952	T	C	-0.0129952	2.19999e-09	0.00217109	261055	ebi-a-GCST006098	Vigorous physical activity
10	126727268	rs11599762	CTBP2	C	A	C	-0.0129873	C	A	-0.0129873	2.19999e-09	0.00217096	261055	ebi-a-GCST006098	Vigorous physical activity
10	126730827	rs11598868	CTBP2	G	A	G	-0.0129092	G	A	-0.0129092	2.1e-09	0.0021565	261055	ebi-a-GCST006098	Vigorous physical activity
10	126733276	rs11599362	CTBP2	T	C	T	-0.0129317	T	C	-0.0129317	2.19999e-09	0.00216116	261055	ebi-a-GCST006098	Vigorous physical activity
10	126737566	rs12411700	CTBP2	C	G	C	-0.0134272	C	G	-0.0134272	3.59998e-10	0.00214145	261055	ebi-a-GCST006098	Vigorous physical activity
11	457879	rs1056506	PTDSS2	T	C	T	-0.0179583	T	C	-0.0179583	8.10009e-09	0.00311396	408112	ebi-a-GCST90002385	High light scatter reticulocyte count
11	457879	rs1056506	PTDSS2	T	C	T	-0.0222602	T	C	-0.0222602	3.59998e-12	0.00320147	408112	ebi-a-GCST90002387	Immature fraction of reticulocytes
11	458595	rs35996687	PTDSS2	A	G	A	-0.0214064	A	G	-0.0214064	8.9002e-11	0.00330142	408112	ebi-a-GCST90002387	Immature fraction of reticulocytes
11	460765	rs35389167	PTDSS2	G	A	G	-0.0180035	G	A	-0.0180035	7.29995e-09	0.00311284	408112	ebi-a-GCST90002385	High light scatter reticulocyte count
11	460765	rs35389167	PTDSS2	G	A	G	-0.0223041	G	A	-0.0223041	3.19963e-12	0.00320031	408112	ebi-a-GCST90002387	Immature fraction of reticulocytes
11	462684	rs12417570	PTDSS2	T	C	T	-0.0214431	T	C	-0.0214431	8.30042e-11	0.00330105	408112	ebi-a-GCST90002387	Immature fraction of reticulocytes
11	462855	rs61876323	PTDSS2	A	G	A	-0.0180059	A	G	-0.0180059	7.29995e-09	0.00311292	408112	ebi-a-GCST90002385	High light scatter reticulocyte count
11	462855	rs61876323	PTDSS2	A	G	A	-0.0222176	A	G	-0.0222176	3.90032e-12	0.00320041	408112	ebi-a-GCST90002387	Immature fraction of reticulocytes
11	467368	rs61876326	ENSG00000255237	G	A	G	-0.0180927	G	A	-0.0180927	6.1e-09	0.00311159	408112	ebi-a-GCST90002385	High light scatter reticulocyte count
11	467368	rs61876326	ENSG00000255237	G	A	G	-0.0223274	G	A	-0.0223274	2.99985e-12	0.00319902	408112	ebi-a-GCST90002387	Immature fraction of reticulocytes
11	473300	rs12418639	PTDSS2	T	G	T	-0.0181279	T	G	-0.0181279	5.69994e-09	0.00311131	408112	ebi-a-GCST90002385	High light scatter reticulocyte count
11	473300	rs12418639	PTDSS2	T	G	T	-0.0223083	T	G	-0.0223083	3.10027e-12	0.00319873	408112	ebi-a-GCST90002387	Immature fraction of reticulocytes
11	477623	rs12794284	PTDSS2	T	C	T	-0.0180772	T	C	-0.0180772	6.19998e-09	0.00311109	408112	ebi-a-GCST90002385	High light scatter reticulocyte count
11	477623	rs12794284	PTDSS2	T	C	T	-0.0222786	T	C	-0.0222786	3.29989e-12	0.0031985	408112	ebi-a-GCST90002387	Immature fraction of reticulocytes
11	484469	rs35898083	PTDSS2	T	C	T	-0.0181457	T	C	-0.0181457	5.49997e-09	0.00311222	408112	ebi-a-GCST90002385	High light scatter reticulocyte count
11	484469	rs35898083	PTDSS2	T	C	T	-0.0224088	T	C	-0.0224088	2.49977e-12	0.00319968	408112	ebi-a-GCST90002387	Immature fraction of reticulocytes
11	486414	rs71487293	PTDSS2	A	G	A	-0.0181332	A	G	-0.0181332	5.69994e-09	0.00311227	408112	ebi-a-GCST90002385	High light scatter reticulocyte count
11	486414	rs71487293	PTDSS2	A	G	A	-0.0224133	A	G	-0.0224133	2.49977e-12	0.00319973	408112	ebi-a-GCST90002387	Immature fraction of reticulocytes
11	487101	rs61876332	PTDSS2	T	C	T	-0.0170667	T	C	-0.0170667	1.29999e-09	0.00295865	438154	ebi-a-GCST90025971	Immature fraction of reticulocytes
11	487101	rs61876332	PTDSS2	T	C	T	-0.0181191	T	C	-0.0181191	5.80003e-09	0.00311243	408112	ebi-a-GCST90002385	High light scatter reticulocyte count
11	487101	rs61876332	PTDSS2	T	C	T	-0.0224052	T	C	-0.0224052	2.49977e-12	0.00319989	408112	ebi-a-GCST90002387	Immature fraction of reticulocytes
11	487136	rs61876333	PTDSS2	A	G	A	-0.0215368	A	G	-0.0215368	6.79986e-11	0.00330027	408112	ebi-a-GCST90002387	Immature fraction of reticulocytes
11	487201	rs61876334	PTDSS2	C	T	C	-0.0181462	C	T	-0.0181462	5.49997e-09	0.00311229	408112	ebi-a-GCST90002385	High light scatter reticulocyte count
11	487201	rs61876334	PTDSS2	C	T	C	-0.0224259	C	T	-0.0224259	2.39994e-12	0.00319974	408112	ebi-a-GCST90002387	Immature fraction of reticulocytes
11	490035	rs61742833	PTDSS2	T	C	T	-0.024401	T	C	-0.024401	7.39946e-12	0.00356228	408112	ebi-a-GCST90002387	Immature fraction of reticulocytes
11	490035	rs61742833	PTDSS2	T	C	T	-0.0193169	T	C	-0.0193169	1.2e-09	0.00332652	438154	ebi-a-GCST90025971	Immature fraction of reticulocytes
11	491334	rs1044707	PTDSS2	C	A	C	-0.0167872	C	A	-0.0167872	4.49997e-09	0.00291671	520010	ebi-a-GCST90028993	High light scatter reticulocyte count
11	491334	rs1044707	PTDSS2	C	A	C	-0.0181821	C	A	-0.0181821	6.80002e-09	0.00313706	408112	ebi-a-GCST90002386	High light scatter reticulocyte percentage of red cells
11	491334	rs1044707	PTDSS2	C	A	C	-0.0190947	C	A	-0.0190947	1.09999e-09	0.00313359	408112	ebi-a-GCST90002385	High light scatter reticulocyte count
11	491334	rs1044707	PTDSS2	C	A	C	-0.0203864	C	A	-0.0203864	6.82182e-09	0.00351769	344728	ukb-d-30280_irnt	Immature reticulocyte fraction
11	491334	rs1044707	PTDSS2	C	A	C	-0.0229844	C	A	-0.0229844	9.70063e-13	0.00322171	408112	ebi-a-GCST90002387	Immature fraction of reticulocytes
11	494662	rs10540	RNH1	A	G	A	-0.0165784	A	G	-0.0165784	5.69994e-09	0.00290746	520010	ebi-a-GCST90028993	High light scatter reticulocyte count
11	494662	rs10540	RNH1	A	G	A	-0.0174408	A	G	-0.0174408	5.19996e-10	0.00296694	438154	ebi-a-GCST90025971	Immature fraction of reticulocytes
11	494662	rs10540	RNH1	A	G	A	-0.0188448	A	G	-0.0188448	1.6e-09	0.00312363	408112	ebi-a-GCST90002385	High light scatter reticulocyte count
11	494662	rs10540	RNH1	A	G	A	-0.0204332	A	G	-0.0204332	5.63534e-09	0.00350641	344728	ukb-d-30280_irnt	Immature reticulocyte fraction
11	494662	rs10540	RNH1	A	G	A	-0.0228462	A	G	-0.0228462	1.10002e-12	0.00321139	408112	ebi-a-GCST90002387	Immature fraction of reticulocytes
11	495699	rs61876340	PTDSS2	C	A	C	-0.016747	C	A	-0.016747	4.30002e-09	0.00290777	520010	ebi-a-GCST90028993	High light scatter reticulocyte count
11	495699	rs61876340	PTDSS2	C	A	C	-0.0188169	C	A	-0.0188169	1.7e-09	0.00312398	408112	ebi-a-GCST90002385	High light scatter reticulocyte count
11	495699	rs61876340	PTDSS2	C	A	C	-0.0206094	C	A	-0.0206094	4.18581e-09	0.00350689	344728	ukb-d-30280_irnt	Immature reticulocyte fraction
11	495699	rs61876340	PTDSS2	C	A	C	-0.0228734	C	A	-0.0228734	1.10002e-12	0.00321173	408112	ebi-a-GCST90002387	Immature fraction of reticulocytes
11	495892	rs61876341	PTDSS2	G	C	G	-0.0166531	G	C	-0.0166531	4.79999e-09	0.00290735	520010	ebi-a-GCST90028993	High light scatter reticulocyte count
11	495892	rs61876341	PTDSS2	G	C	G	-0.0179472	G	C	-0.0179472	9.49992e-09	0.00312699	408112	ebi-a-GCST90002386	High light scatter reticulocyte percentage of red cells
11	495892	rs61876341	PTDSS2	G	C	G	-0.0188719	G	C	-0.0188719	1.5e-09	0.00312353	408112	ebi-a-GCST90002385	High light scatter reticulocyte count
11	495892	rs61876341	PTDSS2	G	C	G	-0.0205381	G	C	-0.0205381	4.7062e-09	0.00350636	344728	ukb-d-30280_irnt	Immature reticulocyte fraction
11	495892	rs61876341	PTDSS2	G	C	G	-0.0229131	G	C	-0.0229131	9.70063e-13	0.00321127	408112	ebi-a-GCST90002387	Immature fraction of reticulocytes
11	496193	rs61876342	PTDSS2	G	T	G	-0.018543	G	T	-0.018543	2.59998e-09	0.003115	408112	ebi-a-GCST90002385	High light scatter reticulocyte count
11	496193	rs61876342	PTDSS2	G	T	G	-0.0164073	G	T	-0.0164073	6.69993e-09	0.00289959	520010	ebi-a-GCST90028993	High light scatter reticulocyte count
11	496193	rs61876342	PTDSS2	G	T	G	-0.0205719	G	T	-0.0205719	4.03822e-09	0.00349697	344728	ukb-d-30280_irnt	Immature reticulocyte fraction
11	496193	rs61876342	PTDSS2	G	T	G	-0.0225139	G	T	-0.0225139	2.09991e-12	0.0032025	408112	ebi-a-GCST90002387	Immature fraction of reticulocytes
11	501468	rs12806089	RNH1	A	G	A	-0.01657	A	G	-0.01657	5.89997e-09	0.00290916	520010	ebi-a-GCST90028993	High light scatter reticulocyte count
11	501468	rs12806089	RNH1	A	G	A	-0.020437	A	G	-0.020437	5.70493e-09	0.00350829	344728	ukb-d-30280_irnt	Immature reticulocyte fraction
11	501468	rs12806089	RNH1	A	G	A	-0.0187952	A	G	-0.0187952	1.79999e-09	0.00312544	408112	ebi-a-GCST90002385	High light scatter reticulocyte count
11	501468	rs12806089	RNH1	A	G	A	-0.0228052	A	G	-0.0228052	1.29987e-12	0.0032132	408112	ebi-a-GCST90002387	Immature fraction of reticulocytes
11	502371	rs12788729	RNH1	A	G	A	-0.0165816	A	G	-0.0165816	5.60003e-09	0.00290865	520010	ebi-a-GCST90028993	High light scatter reticulocyte count
11	502371	rs12788729	RNH1	A	G	A	-0.0187291	A	G	-0.0187291	2.1e-09	0.00312487	408112	ebi-a-GCST90002385	High light scatter reticulocyte count
11	502371	rs12788729	RNH1	A	G	A	-0.0204936	A	G	-0.0204936	5.14908e-09	0.00350771	344728	ukb-d-30280_irnt	Immature reticulocyte fraction
11	502371	rs12788729	RNH1	A	G	A	-0.0227722	A	G	-0.0227722	1.39991e-12	0.00321264	408112	ebi-a-GCST90002387	Immature fraction of reticulocytes
11	503385	rs12419716	RNH1	G	C	G	-0.0166096	G	C	-0.0166096	5.30005e-09	0.00290869	520010	ebi-a-GCST90028993	High light scatter reticulocyte count
11	503385	rs12419716	RNH1	G	C	G	-0.0188343	G	C	-0.0188343	1.7e-09	0.00312494	408112	ebi-a-GCST90002385	High light scatter reticulocyte count
11	503385	rs12419716	RNH1	G	C	G	-0.0205361	G	C	-0.0205361	4.7884e-09	0.00350774	344728	ukb-d-30280_irnt	Immature reticulocyte fraction
11	503385	rs12419716	RNH1	G	C	G	-0.0228334	G	C	-0.0228334	1.20005e-12	0.00321271	408112	ebi-a-GCST90002387	Immature fraction of reticulocytes
11	503710	rs12419766	RNH1	T	C	T	-0.0165939	T	C	-0.0165939	5.39995e-09	0.00291005	520010	ebi-a-GCST90028993	High light scatter reticulocyte count
11	503710	rs12419766	RNH1	T	C	T	-0.0179482	T	C	-0.0179482	9.80009e-09	0.00312999	408112	ebi-a-GCST90002386	High light scatter reticulocyte percentage of red cells
11	503710	rs12419766	RNH1	T	C	T	-0.0188892	T	C	-0.0188892	1.5e-09	0.00312652	408112	ebi-a-GCST90002385	High light scatter reticulocyte count
11	503710	rs12419766	RNH1	T	C	T	-0.0205299	T	C	-0.0205299	4.92538e-09	0.00350949	344728	ukb-d-30280_irnt	Immature reticulocyte fraction
11	503710	rs12419766	RNH1	T	C	T	-0.0228144	T	C	-0.0228144	1.29987e-12	0.00321434	408112	ebi-a-GCST90002387	Immature fraction of reticulocytes
11	504411	rs61876357	RNH1	G	C	G	-0.018678	G	C	-0.018678	2.30001e-09	0.00312684	408112	ebi-a-GCST90002385	High light scatter reticulocyte count
11	504411	rs61876357	RNH1	G	C	G	-0.0164776	G	C	-0.0164776	6.49995e-09	0.00291049	520010	ebi-a-GCST90028993	High light scatter reticulocyte count
11	504411	rs61876357	RNH1	G	C	G	-0.0205844	G	C	-0.0205844	4.50184e-09	0.00350985	344728	ukb-d-30280_irnt	Immature reticulocyte fraction
11	504411	rs61876357	RNH1	G	C	G	-0.0227205	G	C	-0.0227205	1.59993e-12	0.00321465	408112	ebi-a-GCST90002387	Immature fraction of reticulocytes
11	506229	rs12786555	RNH1	T	C	T	-0.0164424	T	C	-0.0164424	7.10003e-09	0.00291065	520010	ebi-a-GCST90028993	High light scatter reticulocyte count
11	506229	rs12786555	RNH1	T	C	T	-0.0186597	T	C	-0.0186597	2.39999e-09	0.00312701	408112	ebi-a-GCST90002385	High light scatter reticulocyte count
11	506229	rs12786555	RNH1	T	C	T	-0.0205684	T	C	-0.0205684	4.6365e-09	0.00351004	344728	ukb-d-30280_irnt	Immature reticulocyte fraction
11	506229	rs12786555	RNH1	T	C	T	-0.0227079	T	C	-0.0227079	1.59993e-12	0.00321483	408112	ebi-a-GCST90002387	Immature fraction of reticulocytes
11	506442	rs35874808	RNH1	T	G	T	-0.0163724	T	G	-0.0163724	8.40001e-09	0.00291047	520010	ebi-a-GCST90028993	High light scatter reticulocyte count
11	506442	rs35874808	RNH1	T	G	T	-0.0185722	T	G	-0.0185722	2.90001e-09	0.00312682	408112	ebi-a-GCST90002385	High light scatter reticulocyte count
11	506442	rs35874808	RNH1	T	G	T	-0.0205226	T	G	-0.0205226	5.00691e-09	0.00350988	344728	ukb-d-30280_irnt	Immature reticulocyte fraction
11	506442	rs35874808	RNH1	T	G	T	-0.0226469	T	G	-0.0226469	1.9002e-12	0.00321464	408112	ebi-a-GCST90002387	Immature fraction of reticulocytes
11	506596	rs61877760	RNH1	T	C	T	-0.0164035	T	C	-0.0164035	7.79992e-09	0.00291109	520010	ebi-a-GCST90028993	High light scatter reticulocyte count
11	506596	rs61877760	RNH1	T	C	T	-0.0186563	T	C	-0.0186563	2.39999e-09	0.00312747	408112	ebi-a-GCST90002385	High light scatter reticulocyte count
11	506596	rs61877760	RNH1	T	C	T	-0.0205749	T	C	-0.0205749	4.6101e-09	0.00351058	344728	ukb-d-30280_irnt	Immature reticulocyte fraction
11	506596	rs61877760	RNH1	T	C	T	-0.0227035	T	C	-0.0227035	1.69981e-12	0.00321531	408112	ebi-a-GCST90002387	Immature fraction of reticulocytes
11	22224074	rs12577575	ANO5	T	C	T	0.00241489	T	C	0.00241489	6.71089e-09	0.000416492	337199	ukb-a-535	Diagnoses - main ICD10: I30 Acute pericarditis
11	22224074	rs12577575	ANO5	T	C	T	-0.03456	T	C	-0.03456	2.14102e-10	0.005442	NA	bbj-a-13	Creatine kinase
11	22227288	rs74233076	ANO5	A	G	A	0.00240177	A	G	0.00240177	7.43122e-09	0.000415457	337199	ukb-a-535	Diagnoses - main ICD10: I30 Acute pericarditis
11	22227288	rs74233076	ANO5	A	G	A	-0.03457	A	G	-0.03457	2.064e-10	0.005438	NA	bbj-a-13	Creatine kinase
11	22231197	rs77168656	ANO5	G	C	G	0.00240606	G	C	0.00240606	7.1374e-09	0.000415711	337199	ukb-a-535	Diagnoses - main ICD10: I30 Acute pericarditis
11	22231197	rs77168656	ANO5	G	C	G	-0.03511	G	C	-0.03511	1.33199e-10	0.005466	NA	bbj-a-13	Creatine kinase
11	22232046	rs12575060	ANO5	C	T	C	0.00242752	C	T	0.00242752	6.05564e-09	0.000417433	337199	ukb-a-535	Diagnoses - main ICD10: I30 Acute pericarditis
11	22232046	rs12575060	ANO5	C	T	C	-0.03517	C	T	-0.03517	1.238e-10	0.005466	NA	bbj-a-13	Creatine kinase
11	22236514	rs79502603	ANO5	A	C	A	0.00247051	A	C	0.00247051	4.36265e-09	0.000420873	337199	ukb-a-535	Diagnoses - main ICD10: I30 Acute pericarditis
11	22236514	rs79502603	ANO5	A	C	A	-0.03524	A	C	-0.03524	1.19801e-10	0.005473	NA	bbj-a-13	Creatine kinase
11	22236651	rs78076061	ANO5	G	A	G	0.00246877	G	A	0.00246877	4.43394e-09	0.000420769	337199	ukb-a-535	Diagnoses - main ICD10: I30 Acute pericarditis
11	22236651	rs78076061	ANO5	G	A	G	-0.03525	G	A	-0.03525	1.196e-10	0.005473	NA	bbj-a-13	Creatine kinase
11	22244794	rs74681807	ANO5	T	A	T	0.00241336	T	A	0.00241336	6.73132e-09	0.000416266	337199	ukb-a-535	Diagnoses - main ICD10: I30 Acute pericarditis
11	22244794	rs74681807	ANO5	T	A	T	-0.03556	T	A	-0.03556	4.23838e-11	0.005391	NA	bbj-a-13	Creatine kinase
11	22245176	rs76458403	ANO5	G	A	G	0.0024651	G	A	0.0024651	4.56037e-09	0.000420477	337199	ukb-a-535	Diagnoses - main ICD10: I30 Acute pericarditis
11	22245176	rs76458403	ANO5	G	A	G	-0.03554	G	A	-0.03554	4.28647e-11	0.00539	NA	bbj-a-13	Creatine kinase
11	22247064	rs80354649	ANO5	G	A	G	0.00239783	G	A	0.00239783	7.84152e-09	0.000415426	337199	ukb-a-535	Diagnoses - main ICD10: I30 Acute pericarditis
11	22247064	rs80354649	ANO5	G	A	G	-0.03551	G	A	-0.03551	4.40656e-11	0.005388	NA	bbj-a-13	Creatine kinase
11	22251347	rs78799497	ANO5	C	T	C	-0.03535	C	T	-0.03535	4.97966e-11	0.005379	NA	bbj-a-13	Creatine kinase
11	22253502	rs76423306	ANO5	A	G	A	0.00240084	A	G	0.00240084	7.64839e-09	0.000415645	337199	ukb-a-535	Diagnoses - main ICD10: I30 Acute pericarditis
11	22253502	rs76423306	ANO5	A	G	A	-0.03457	A	G	-0.03457	2.04099e-10	0.005437	NA	bbj-a-13	Creatine kinase
11	22261069	rs76657996	ANO5	T	G	T	0.00236832	T	G	0.00236832	9.72859e-09	0.000412919	337199	ukb-a-535	Diagnoses - main ICD10: I30 Acute pericarditis
11	22261069	rs76657996	ANO5	T	G	T	-0.03431	T	G	-0.03431	4.18601e-10	0.005492	NA	bbj-a-13	Creatine kinase
11	22271070	rs76940731	ANO5	G	A	G	0.00243247	G	A	0.00243247	5.95909e-09	0.000418091	337199	ukb-a-535	Diagnoses - main ICD10: I30 Acute pericarditis
11	22271070	rs76940731	ANO5	G	A	G	-0.03396	G	A	-0.03396	6.20297e-10	0.005491	NA	bbj-a-13	Creatine kinase
11	22271151	rs74881096	ANO5	A	G	A	-0.03397	A	G	-0.03397	6.186e-10	0.005491	NA	bbj-a-13	Creatine kinase
11	22275516	rs75783884	ANO5	C	T	C	-0.03403	C	T	-0.03403	5.73601e-10	0.005491	NA	bbj-a-13	Creatine kinase
11	22278415	rs79991670	ENSG00000255372	T	C	T	0.0023744	T	C	0.0023744	9.00244e-09	0.000413034	337199	ukb-a-535	Diagnoses - main ICD10: I30 Acute pericarditis
11	22278415	rs79991670	ENSG00000255372	T	C	T	-0.0342	T	C	-0.0342	4.63106e-10	0.005489	NA	bbj-a-13	Creatine kinase
11	22282064	rs12574432	ENSG00000255372	C	T	C	0.00242712	C	T	0.00242712	6.18486e-09	0.000417617	337199	ukb-a-535	Diagnoses - main ICD10: I30 Acute pericarditis
11	22282064	rs12574432	ENSG00000255372	C	T	C	-0.03423	C	T	-0.03423	4.50599e-10	0.005489	NA	bbj-a-13	Creatine kinase
12	48213991	rs80325942	HDAC7	T	C	T	0.0277	T	C	0.0277	5.44127e-27	0.0026	350474	ebi-a-GCST90018969	Platelet count
12	48213991	rs80325942	HDAC7	T	C	T	0.0927	T	C	0.0927	9.62942e-16	0.0115	NA	finn-b-I9_DISVEINLYMPH	Diseases of veins, lymphatic vessels and lymph nodes, not elsewhere classified
12	48213991	rs80325942	HDAC7	T	C	T	0.0944	T	C	0.0944	1.14393e-14	0.0122	NA	finn-b-FG_DISVEINLYMPH	Diseases of veins, lymphatic vessels and lymph nodes, not elsewhere classified (FINNGEN)
12	48213991	rs80325942	HDAC7	T	C	T	0.1076	T	C	0.1076	1.88191e-19	0.0119	459702	ebi-a-GCST90018939	Varicose veins
12	48213991	rs80325942	HDAC7	T	C	T	0.1215	T	C	0.1215	1.8578e-16	0.0148	NA	finn-b-I9_VARICVE_EXNONE	Varicose veins (no controls excluded)
12	48213991	rs80325942	HDAC7	T	C	T	0.1259	T	C	0.1259	2.96825e-17	0.0149	NA	finn-b-I9_VARICVE	Varicose veins
12	48213991	rs80325942	HDAC7	T	C	T	0.030053	T	C	0.030053	1.26999e-47	0.002072	542827	ebi-a-GCST90002357	Platelet count
12	48213991	rs80325942	HDAC7	T	C	T	0.030455	T	C	0.030455	1.10002e-38	0.0023409	408112	ebi-a-GCST90002402	Platelet count
12	48213991	rs80325942	HDAC7	T	C	T	0.030649	T	C	0.030649	1.03705e-43	0.00221058	396621	ebi-a-GCST90013980	Platelet count (UKB data field 30080)
12	48213991	rs80325942	HDAC7	T	C	T	0.0129984	T	C	0.0129984	1.7e-10	0.0021375	572201	ebi-a-GCST90029000	Platelet distribution width
12	48213991	rs80325942	HDAC7	T	C	T	0.0142012	T	C	0.0142012	3.29997e-09	0.00239997	408112	ebi-a-GCST90002401	Platelet distribution width
12	48213991	rs80325942	HDAC7	T	C	T	0.0216884	T	C	0.0216884	1.0522e-17	0.00253117	350471	ukb-d-30090_irnt	Platelet crit
12	48213991	rs80325942	HDAC7	T	C	T	0.0241504	T	C	0.0241504	1.20005e-24	0.00235728	408112	ebi-a-GCST90002400	Plateletcrit
12	48213991	rs80325942	HDAC7	T	C	T	0.0276957	T	C	0.0276957	5.49288e-27	0.00257446	350474	ukb-d-30080_irnt	Platelet count
12	48213991	rs80325942	HDAC7	T	C	T	0.0287772	T	C	0.0287772	1.66495e-12	0.00407609	164339	ebi-a-GCST004607	Plateletcrit
12	48213991	rs80325942	HDAC7	T	C	T	0.0290961	T	C	0.0290961	2.99985e-47	0.0020707	600968	ebi-a-GCST90028999	Platelet count
12	48213991	rs80325942	HDAC7	T	C	T	0.0341124	T	C	0.0341124	4.57615e-17	0.0040624	166066	ebi-a-GCST004603	Platelet count
12	48213991	rs80325942	HDAC7	T	C	T	0.00345252	T	C	0.00345252	3.90032e-14	0.000456371	462933	ukb-b-15592	Operation code: varicose vein surgery
12	48213991	rs80325942	HDAC7	T	C	T	-0.0182	T	C	-0.0182	6.44911e-12	0.0026	349856	ebi-a-GCST90018962	Lymphocyte count
12	48213991	rs80325942	HDAC7	T	C	T	-0.011988	T	C	-0.011988	9.64007e-09	0.002088	562233	ieu-b-30	white blood cell count
12	48213991	rs80325942	HDAC7	T	C	T	-0.011988	T	C	-0.011988	9.64007e-09	0.002088	562243	ebi-a-GCST90002374	White blood cell count
12	48213991	rs80325942	HDAC7	T	C	T	-0.017629	T	C	-0.017629	3.41586e-11	0.00265993	350470	ukb-d-30100_irnt	Mean platelet (thrombocyte) volume
12	48213991	rs80325942	HDAC7	T	C	T	-0.017815	T	C	-0.017815	3.05985e-17	0.002108	460935	ebi-a-GCST90002346	Mean platelet volume
12	48213991	rs80325942	HDAC7	T	C	T	-0.019835	T	C	-0.019835	2.02023e-20	0.00214	524913	ieu-b-32	lymphocyte cell count
12	48213991	rs80325942	HDAC7	T	C	T	-0.019835	T	C	-0.019835	2.02023e-20	0.00214	524923	ebi-a-GCST90002316	Lymphocyte count
12	48213991	rs80325942	HDAC7	T	C	T	-0.0164066	T	C	-0.0164066	4.07662e-12	0.00236594	395949	ebi-a-GCST90013982	Lymphocyte count (UKB data field 30120)
12	48213991	rs80325942	HDAC7	T	C	T	-0.0176967	T	C	-0.0176967	3.10027e-15	0.00224389	408112	ebi-a-GCST90002395	Mean platelet volume
12	48213991	rs80325942	HDAC7	T	C	T	-0.0177507	T	C	-0.0177507	1.80011e-17	0.00219311	509277	ebi-a-GCST90028994	White blood cell count (lymphocyte)
12	48213991	rs80325942	HDAC7	T	C	T	-0.0180665	T	C	-0.0180665	5.70033e-25	0.00189881	694866	ebi-a-GCST90028996	Mean platelet volume
12	48213991	rs80325942	HDAC7	T	C	T	-0.0181758	T	C	-0.0181758	6.45952e-12	0.00264592	349856	ukb-d-30120_irnt	Lymphocyte count
12	48213991	rs80325942	HDAC7	T	C	T	-0.0187231	T	C	-0.0187231	2.09991e-15	0.00236016	408112	ebi-a-GCST90002388	Lymphocyte count
12	48213991	rs80325942	HDAC7	T	C	T	-0.0196625	T	C	-0.0196625	2.13255e-19	0.00218321	396616	ebi-a-GCST90013981	Mean platelet thrombocyte volume (UKB data field 30100)
12	48214833	rs7487602	HDAC7	A	C	A	0.0276	A	C	0.0276	7.43019e-27	0.0026	350474	ebi-a-GCST90018969	Platelet count
12	48214833	rs7487602	HDAC7	A	C	A	0.0929	A	C	0.0929	7.84874e-16	0.0115	NA	finn-b-I9_DISVEINLYMPH	Diseases of veins, lymphatic vessels and lymph nodes, not elsewhere classified
12	48214833	rs7487602	HDAC7	A	C	A	0.0946	A	C	0.0946	9.98389e-15	0.0122	NA	finn-b-FG_DISVEINLYMPH	Diseases of veins, lymphatic vessels and lymph nodes, not elsewhere classified (FINNGEN)
12	48214833	rs7487602	HDAC7	A	C	A	0.1079	A	C	0.1079	1.22096e-19	0.0119	459702	ebi-a-GCST90018939	Varicose veins
12	48214833	rs7487602	HDAC7	A	C	A	0.1218	A	C	0.1218	1.45613e-16	0.0147	NA	finn-b-I9_VARICVE_EXNONE	Varicose veins (no controls excluded)
12	48214833	rs7487602	HDAC7	A	C	A	0.1263	A	C	0.1263	2.33077e-17	0.0149	NA	finn-b-I9_VARICVE	Varicose veins
12	48214833	rs7487602	HDAC7	A	C	A	0.027619	A	C	0.027619	7.5024e-27	0.00257421	350474	ukb-d-30080_irnt	Platelet count
12	48214833	rs7487602	HDAC7	A	C	A	0.028397	A	C	0.028397	3.27869e-12	0.00407696	164339	ebi-a-GCST004607	Plateletcrit
12	48214833	rs7487602	HDAC7	A	C	A	0.029895	A	C	0.029895	4.60045e-47	0.002074	542827	ebi-a-GCST90002357	Platelet count
12	48214833	rs7487602	HDAC7	A	C	A	0.030473	A	C	0.030473	3.09457e-43	0.00221043	396621	ebi-a-GCST90013980	Platelet count (UKB data field 30080)
12	48214833	rs7487602	HDAC7	A	C	A	0.0131848	A	C	0.0131848	1e-10	0.00213723	572201	ebi-a-GCST90029000	Platelet distribution width
12	48214833	rs7487602	HDAC7	A	C	A	0.0145188	A	C	0.0145188	1.40001e-09	0.00239963	408112	ebi-a-GCST90002401	Platelet distribution width
12	48214833	rs7487602	HDAC7	A	C	A	0.0216399	A	C	0.0216399	1.23367e-17	0.00253092	350471	ukb-d-30090_irnt	Platelet crit
12	48214833	rs7487602	HDAC7	A	C	A	0.0240186	A	C	0.0240186	2.19989e-24	0.00235696	408112	ebi-a-GCST90002400	Plateletcrit
12	48214833	rs7487602	HDAC7	A	C	A	0.0289161	A	C	0.0289161	1.10002e-46	0.00207044	600968	ebi-a-GCST90028999	Platelet count
12	48214833	rs7487602	HDAC7	A	C	A	0.0302996	A	C	0.0302996	2.49977e-38	0.00234057	408112	ebi-a-GCST90002402	Platelet count
12	48214833	rs7487602	HDAC7	A	C	A	0.0338069	A	C	0.0338069	8.79832e-17	0.00406334	166066	ebi-a-GCST004603	Platelet count
12	48214833	rs7487602	HDAC7	A	C	A	0.00341803	A	C	0.00341803	6.89922e-14	0.000456302	462933	ukb-b-15592	Operation code: varicose vein surgery
12	48214833	rs7487602	HDAC7	A	C	A	-0.0182	A	C	-0.0182	5.27594e-12	0.0026	349856	ebi-a-GCST90018962	Lymphocyte count
12	48214833	rs7487602	HDAC7	A	C	A	-0.01988	A	C	-0.01988	1.81009e-20	0.002142	523978	ieu-b-32	lymphocyte cell count
12	48214833	rs7487602	HDAC7	A	C	A	-0.01988	A	C	-0.01988	1.81009e-20	0.002142	524923	ebi-a-GCST90002316	Lymphocyte count
12	48214833	rs7487602	HDAC7	A	C	A	-0.012077	A	C	-0.012077	7.78001e-09	0.00209	561297	ieu-b-30	white blood cell count
12	48214833	rs7487602	HDAC7	A	C	A	-0.012077	A	C	-0.012077	7.78001e-09	0.00209	562243	ebi-a-GCST90002374	White blood cell count
12	48214833	rs7487602	HDAC7	A	C	A	-0.017516	A	C	-0.017516	1.08993e-16	0.00211	460935	ebi-a-GCST90002346	Mean platelet volume
12	48214833	rs7487602	HDAC7	A	C	A	-0.0164947	A	C	-0.0164947	3.12033e-12	0.00236578	395949	ebi-a-GCST90013982	Lymphocyte count (UKB data field 30120)
12	48214833	rs7487602	HDAC7	A	C	A	-0.0175474	A	C	-0.0175474	4.18601e-11	0.00265968	350470	ukb-d-30100_irnt	Mean platelet (thrombocyte) volume
12	48214833	rs7487602	HDAC7	A	C	A	-0.0176054	A	C	-0.0176054	4.30031e-15	0.00224358	408112	ebi-a-GCST90002395	Mean platelet volume
12	48214833	rs7487602	HDAC7	A	C	A	-0.0179002	A	C	-0.0179002	9.3994e-18	0.00219283	509277	ebi-a-GCST90028994	White blood cell count (lymphocyte)
12	48214833	rs7487602	HDAC7	A	C	A	-0.0180136	A	C	-0.0180136	4.40048e-25	0.00189857	694866	ebi-a-GCST90028996	Mean platelet volume
12	48214833	rs7487602	HDAC7	A	C	A	-0.0182497	A	C	-0.0182497	5.28445e-12	0.00264567	349856	ukb-d-30120_irnt	Lymphocyte count
12	48214833	rs7487602	HDAC7	A	C	A	-0.0189136	A	C	-0.0189136	1.10002e-15	0.00235987	408112	ebi-a-GCST90002388	Lymphocyte count
12	48214833	rs7487602	HDAC7	A	C	A	-0.0195605	A	C	-0.0195605	3.24414e-19	0.00218307	396616	ebi-a-GCST90013981	Mean platelet thrombocyte volume (UKB data field 30100)
12	48217013	rs11168256	HDAC7	G	A	G	0.126	G	A	0.126	2.85299e-17	0.0149	NA	finn-b-I9_VARICVE	Varicose veins
12	48217013	rs11168256	HDAC7	G	A	G	0.0274	G	A	0.0274	6.2647e-27	0.0025	350474	ebi-a-GCST90018969	Platelet count
12	48217013	rs11168256	HDAC7	G	A	G	0.0928	G	A	0.0928	8.6836e-16	0.0115	NA	finn-b-I9_DISVEINLYMPH	Diseases of veins, lymphatic vessels and lymph nodes, not elsewhere classified
12	48217013	rs11168256	HDAC7	G	A	G	0.0944	G	A	0.0944	1.1371e-14	0.0122	NA	finn-b-FG_DISVEINLYMPH	Diseases of veins, lymphatic vessels and lymph nodes, not elsewhere classified (FINNGEN)
12	48217013	rs11168256	HDAC7	G	A	G	0.1064	G	A	0.1064	2.50323e-19	0.0118	459702	ebi-a-GCST90018939	Varicose veins
12	48217013	rs11168256	HDAC7	G	A	G	0.1215	G	A	0.1215	1.76198e-16	0.0148	NA	finn-b-I9_VARICVE_EXNONE	Varicose veins (no controls excluded)
12	48217013	rs11168256	HDAC7	G	A	G	0.026699	G	A	0.026699	3.0761e-11	0.0040192	164339	ebi-a-GCST004607	Plateletcrit
12	48217013	rs11168256	HDAC7	G	A	G	0.029403	G	A	0.029403	1.57e-46	0.002052	542827	ebi-a-GCST90002357	Platelet count
12	48217013	rs11168256	HDAC7	G	A	G	0.0121239	G	A	0.0121239	8.30004e-09	0.00219372	502773	ebi-a-GCST90029009	Waist-hip ratio
12	48217013	rs11168256	HDAC7	G	A	G	0.0128484	G	A	0.0128484	1.89998e-10	0.00211502	572201	ebi-a-GCST90029000	Platelet distribution width
12	48217013	rs11168256	HDAC7	G	A	G	0.0143767	G	A	0.0143767	1.40001e-09	0.00237474	408112	ebi-a-GCST90002401	Platelet distribution width
12	48217013	rs11168256	HDAC7	G	A	G	0.0211932	G	A	0.0211932	2.61517e-17	0.00250421	350471	ukb-d-30090_irnt	Platelet crit
12	48217013	rs11168256	HDAC7	G	A	G	0.0234571	G	A	0.0234571	8.60003e-24	0.00233254	408112	ebi-a-GCST90002400	Plateletcrit
12	48217013	rs11168256	HDAC7	G	A	G	0.0273676	G	A	0.0273676	6.32412e-27	0.00254704	350474	ukb-d-30080_irnt	Platelet count
12	48217013	rs11168256	HDAC7	G	A	G	0.0284958	G	A	0.0284958	3.19963e-46	0.00204889	600968	ebi-a-GCST90028999	Platelet count
12	48217013	rs11168256	HDAC7	G	A	G	0.0297766	G	A	0.0297766	3.35351e-42	0.00218737	396621	ebi-a-GCST90013980	Platelet count (UKB data field 30080)
12	48217013	rs11168256	HDAC7	G	A	G	0.0298279	G	A	0.0298279	6.00067e-38	0.0023163	408112	ebi-a-GCST90002402	Platelet count
12	48217013	rs11168256	HDAC7	G	A	G	0.0323571	G	A	0.0323571	6.5887e-16	0.00400563	166066	ebi-a-GCST004603	Platelet count
12	48217013	rs11168256	HDAC7	G	A	G	0.00336337	G	A	0.00336337	9.3994e-14	0.00045151	462933	ukb-b-15592	Operation code: varicose vein surgery
12	48217013	rs11168256	HDAC7	G	A	G	-0.0178	G	A	-0.0178	1.00092e-11	0.0026	349856	ebi-a-GCST90018962	Lymphocyte count
12	48217013	rs11168256	HDAC7	G	A	G	-0.011911	G	A	-0.011911	8.60994e-09	0.002068	562238	ieu-b-30	white blood cell count
12	48217013	rs11168256	HDAC7	G	A	G	-0.011911	G	A	-0.011911	8.60994e-09	0.002068	562243	ebi-a-GCST90002374	White blood cell count
12	48217013	rs11168256	HDAC7	G	A	G	-0.017937	G	A	-0.017937	8.60003e-18	0.002086	460935	ebi-a-GCST90002346	Mean platelet volume
12	48217013	rs11168256	HDAC7	G	A	G	-0.019727	G	A	-0.019727	1.35988e-20	0.002119	524918	ieu-b-32	lymphocyte cell count
12	48217013	rs11168256	HDAC7	G	A	G	-0.019727	G	A	-0.019727	1.35988e-20	0.002119	524923	ebi-a-GCST90002316	Lymphocyte count
12	48217013	rs11168256	HDAC7	G	A	G	-0.0162409	G	A	-0.0162409	3.99669e-12	0.00234109	395949	ebi-a-GCST90013982	Lymphocyte count (UKB data field 30120)
12	48217013	rs11168256	HDAC7	G	A	G	-0.0176738	G	A	-0.0176738	1.69981e-15	0.00222032	408112	ebi-a-GCST90002395	Mean platelet volume
12	48217013	rs11168256	HDAC7	G	A	G	-0.0177112	G	A	-0.0177112	6.70039e-18	0.00217001	509277	ebi-a-GCST90028994	White blood cell count (lymphocyte)
12	48217013	rs11168256	HDAC7	G	A	G	-0.0178069	G	A	-0.0178069	1.32069e-11	0.00263159	350470	ukb-d-30100_irnt	Mean platelet (thrombocyte) volume
12	48217013	rs11168256	HDAC7	G	A	G	-0.0178173	G	A	-0.0178173	1.00254e-11	0.00261774	349856	ukb-d-30120_irnt	Lymphocyte count
12	48217013	rs11168256	HDAC7	G	A	G	-0.0181827	G	A	-0.0181827	1.10002e-25	0.00187883	694866	ebi-a-GCST90028996	Mean platelet volume
12	48217013	rs11168256	HDAC7	G	A	G	-0.0188412	G	A	-0.0188412	7.19946e-16	0.00233545	408112	ebi-a-GCST90002388	Lymphocyte count
12	48217013	rs11168256	HDAC7	G	A	G	-0.0195931	G	A	-0.0195931	1.19426e-19	0.00216029	396616	ebi-a-GCST90013981	Mean platelet thrombocyte volume (UKB data field 30100)
12	48223554	rs55913294	LINC02354	G	C	G	0.024	G	C	0.024	7.62255e-22	0.0025	350474	ebi-a-GCST90018969	Platelet count
12	48223554	rs55913294	LINC02354	G	C	G	0.087	G	C	0.087	7.85416e-13	0.0122	NA	finn-b-FG_DISVEINLYMPH	Diseases of veins, lymphatic vessels and lymph nodes, not elsewhere classified (FINNGEN)
12	48223554	rs55913294	LINC02354	G	C	G	0.0847	G	C	0.0847	1.51915e-13	0.0115	NA	finn-b-I9_DISVEINLYMPH	Diseases of veins, lymphatic vessels and lymph nodes, not elsewhere classified
12	48223554	rs55913294	LINC02354	G	C	G	0.0908	G	C	0.0908	7.9671e-15	0.0117	459702	ebi-a-GCST90018939	Varicose veins
12	48223554	rs55913294	LINC02354	G	C	G	0.1139	G	C	0.1139	8.17335e-15	0.0147	NA	finn-b-I9_VARICVE_EXNONE	Varicose veins (no controls excluded)
12	48223554	rs55913294	LINC02354	G	C	G	0.1179	G	C	0.1179	1.74301e-15	0.0148	NA	finn-b-I9_VARICVE	Varicose veins
12	48223554	rs55913294	LINC02354	G	C	G	0.025599	G	C	0.025599	3.57026e-37	0.002008	542827	ebi-a-GCST90002357	Platelet count
12	48223554	rs55913294	LINC02354	G	C	G	0.0191861	G	C	0.0191861	5.21075e-15	0.00245281	350471	ukb-d-30090_irnt	Platelet crit
12	48223554	rs55913294	LINC02354	G	C	G	0.0209919	G	C	0.0209919	4.19952e-20	0.00228572	408112	ebi-a-GCST90002400	Plateletcrit
12	48223554	rs55913294	LINC02354	G	C	G	0.0237557	G	C	0.0237557	1.29987e-34	0.00200727	600968	ebi-a-GCST90028999	Platelet count
12	48223554	rs55913294	LINC02354	G	C	G	0.0239624	G	C	0.0239624	7.67008e-22	0.00249481	350474	ukb-d-30080_irnt	Platelet count
12	48223554	rs55913294	LINC02354	G	C	G	0.0246294	G	C	0.0246294	5.47205e-10	0.00396932	164339	ebi-a-GCST004607	Plateletcrit
12	48223554	rs55913294	LINC02354	G	C	G	0.0258099	G	C	0.0258099	2.19381e-33	0.00214371	396621	ebi-a-GCST90013980	Platelet count (UKB data field 30080)
12	48223554	rs55913294	LINC02354	G	C	G	0.0263323	G	C	0.0263323	4.10015e-31	0.00226988	408112	ebi-a-GCST90002402	Platelet count
12	48223554	rs55913294	LINC02354	G	C	G	0.0291996	G	C	0.0291996	1.58198e-13	0.00395657	166066	ebi-a-GCST004603	Platelet count
12	48223554	rs55913294	LINC02354	G	C	G	0.00301071	G	C	0.00301071	9.8992e-12	0.000442213	462933	ukb-b-15592	Operation code: varicose vein surgery
12	48223554	rs55913294	LINC02354	G	C	G	-0.014987	G	C	-0.014987	2.52988e-13	0.002046	460935	ebi-a-GCST90002346	Mean platelet volume
12	48223554	rs55913294	LINC02354	G	C	G	-0.015716	G	C	-0.015716	3.78007e-14	0.002075	524922	ieu-b-32	lymphocyte cell count
12	48223554	rs55913294	LINC02354	G	C	G	-0.015716	G	C	-0.015716	3.78007e-14	0.002075	524923	ebi-a-GCST90002316	Lymphocyte count
12	48223554	rs55913294	LINC02354	G	C	G	-0.0147637	G	C	-0.0147637	7.39946e-14	0.00212599	509277	ebi-a-GCST90028994	White blood cell count (lymphocyte)
12	48223554	rs55913294	LINC02354	G	C	G	-0.0148071	G	C	-0.0148071	9.20026e-19	0.00184065	694866	ebi-a-GCST90028996	Mean platelet volume
12	48223554	rs55913294	LINC02354	G	C	G	-0.0149329	G	C	-0.0149329	6.79986e-11	0.00228861	408112	ebi-a-GCST90002388	Lymphocyte count
12	48223554	rs55913294	LINC02354	G	C	G	-0.0150618	G	C	-0.0150618	4.40048e-12	0.00217578	408112	ebi-a-GCST90002395	Mean platelet volume
12	48223554	rs55913294	LINC02354	G	C	G	-0.0161613	G	C	-0.0161613	2.2856e-14	0.00211716	396616	ebi-a-GCST90013981	Mean platelet thrombocyte volume (UKB data field 30100)
12	104331157	rs17034946	HSP90B1	T	C	T	-0.2987	T	C	-0.2987	1.41254e-12	0.0422	3301	prot-a-1386	Endoplasmin
12	104333828	rs12426382	HSP90B1	T	C	T	-0.2921	T	C	-0.2921	4.89779e-12	0.0423	3301	prot-a-1386	Endoplasmin
12	104334303	rs17034960	HSP90B1	C	T	C	-0.2803	C	T	-0.2803	2.51189e-11	0.042	3301	prot-a-1386	Endoplasmin
12	104337667	rs1882019	HSP90B1	A	G	A	-0.2922	A	G	-0.2922	3.0903e-12	0.0419	3301	prot-a-1386	Endoplasmin
13	29067865	rs4769602	ENSG00000279393	C	T	C	-0.0233124	C	T	-0.0233124	3.79997e-09	0.00401671	371898	ebi-a-GCST90025978	Lung function (FEV1/FVC)
[truncated: 201 more rows]
