# Supplementary material for: Archaic Adaptive Introgression in Modern Human Reproductive Genes
Source: Research Square preprint supplement (doi:10.21203/rs.3.rs-5544119/v1), 2025-03-19
Supplement: Supplementary file 3 [file 14b6662cdd48928141367c38.xlsx]

## Sheet: README
README: Gene enrichment results from Enrichr (Chen et al., 2013; Kuleshov et al., 2016; Xie et al., 2021) using core haplotype genes. We focused on the Reactome 2022, KEGG 2021 Human, Go Biological Processes, and GO Molecular Function tables. The table is sorted by the adjusted p-value in ascending order of value.

## Sheet: Supplemental Table 11
Dataset	Term	P-value	Adjusted P-value	Odds Ratio	Combined Score	Genes
GO Biological Processes	Striated Muscle Hypertrophy (GO:0014897)	0.00224816	0.0298172	624.594	3808.549663430724	TTN
GO Biological Processes	Detection Of Muscle Stretch (GO:0035995)	0.00269726	0.0298172	499.65	2955.689739283532	TTN
GO Biological Processes	Skeletal Muscle Thin Filament Assembly (GO:0030240)	0.00269726	0.0298172	499.65	2955.689739283532	TTN
GO Biological Processes	Cardiac Muscle Hypertrophy (GO:0003300)	0.00314617	0.0298172	416.3541666666667	2398.8531813701998	TTN
GO Biological Processes	Positive Regulation Of Calcium Ion Import Across Plasma Membrane (GO:1905665)	0.00359491	0.0298172	356.85714285714283	2008.4764659134423	PPP3R1
GO Biological Processes	Skeletal Myofibril Assembly (GO:0014866)	0.00359491	0.0298172	356.85714285714283	2008.4764659134423	TTN
GO Biological Processes	Regulation Of Calcium Ion Import Across Plasma Membrane (GO:1905664)	0.00449184	0.0298172	277.52777777777777	1500.1741678966396	PPP3R1
GO Biological Processes	calcineurin-NFAT Signaling Cascade (GO:0033173)	0.00449184	0.0298172	277.52777777777777	1500.1741678966396	PPP3R1
GO Biological Processes	Calcineurin-Mediated Signaling (GO:0097720)	0.00494004	0.0298172	249.762	1326.3340991921912	PPP3R1
GO Biological Processes	Positive Regulation Of Voltage-Gated Calcium Channel Activity (GO:1901387)	0.00538806	0.0298172	227.04545454545453	1185.9876925180256	PPP3R1
GO Biological Processes	Negative Regulation Of Voltage-Gated Calcium Channel Activity (GO:1901386)	0.00538806	0.0298172	227.04545454545453	1185.9876925180256	PPP3R1
GO Biological Processes	Cardiac Cell Development (GO:0055006)	0.00628356	0.0298172	192.09615384615384	973.8925197668605	TTN
GO Biological Processes	Response To Muscle Stretch (GO:0035994)	0.00628356	0.0298172	192.09615384615384	973.8925197668605	TTN
GO Biological Processes	Cardiac Myofibril Assembly (GO:0055003)	0.00673105	0.0298172	178.36607142857142	892.013	TTN
GO Biological Processes	Mitotic Chromosome Condensation (GO:0007076)	0.00673105	0.0298172	178.36607142857142	892.013	TTN
GO Biological Processes	Protein Kinase A Signaling (GO:0010737)	0.00717835	0.0298172	166.46666666666667	821.7936241053455	TTN
GO Biological Processes	Muscle Tissue Morphogenesis (GO:0060415)	0.00762547	0.0298172	156.055	760.9633551596094	TTN
GO Biological Processes	Detection Of Mechanical Stimulus (GO:0050982)	0.00807242	0.0298172	146.86764705882354	707.7995527019895	TTN
GO Biological Processes	Maintenance Of Protein Localization In Organelle (GO:0072595)	0.00807242	0.0298172	146.86764705882354	707.7995527019895	TAF8
GO Biological Processes	Maintenance Of Protein Location In Nucleus (GO:0051457)	0.00807242	0.0298172	146.86764705882354	707.7995527019895	TAF8
GO Biological Processes	Negative Regulation Of Calcium Ion Transmembrane Transport (GO:1903170)	0.00851919	0.0298172	138.70138888888889	660.9723846479391	PPP3R1
GO Biological Processes	Positive Regulation Of calcineurin-NFAT Signaling Cascade (GO:0070886)	0.00851919	0.0298172	138.70138888888889	660.9723846479391	PPP3R1
GO Biological Processes	Positive Regulation Of Calcineurin-Mediated Signaling (GO:0106058)	0.00851919	0.0298172	138.70138888888889	660.9723846479391	PPP3R1
GO Biological Processes	Inositol Phosphate-Mediated Signaling (GO:0048016)	0.00851919	0.0298172	138.70138888888889	660.9723846479391	PPP3R1
GO Biological Processes	Cardiac Muscle Cell Development (GO:0055013)	0.011641548186931168	0.035356343685646566	99.83	444.5604442545611	TTN
GO Biological Processes	Cardiac Muscle Cell Differentiation (GO:0055007)	0.012086885938503104	0.035356343685646566	95.98557692307692	423.8371981703313	TTN
GO Biological Processes	Positive Regulation Of Calcium Ion Transmembrane Transporter Activity (GO:1901021)	0.012086885938503104	0.035356343685646566	95.98557692307692	423.8371981703313	PPP3R1
GO Biological Processes	Negative Regulation Of Cation Channel Activity (GO:2001258)	0.012532045363447937	0.035356343685646566	92.42592592592592	404.7762265532091	PPP3R1
GO Biological Processes	Regulation Of Voltage-Gated Calcium Channel Activity (GO:1901385)	0.012977026524684581	0.035356343685646566	89.12053571428571	387.1908225092229	PPP3R1
GO Biological Processes	Sarcomere Organization (GO:0045214)	0.012977026524684581	0.035356343685646566	89.12053571428571	387.1908225092229	TTN
GO Biological Processes	Negative Regulation Of Calcium Ion Transmembrane Transporter Activity (GO:1901020)	0.013421829479327331	0.035356343685646566	86.04310344827586	370.92087702683546	PPP3R1
GO Biological Processes	Cardiac Muscle Tissue Morphogenesis (GO:0055008)	0.013866454289070039	0.035356343685646566	83.17083333333333	355.82833874131705	TTN
GO Biological Processes	Muscle Cell Development (GO:0055001)	0.014310901015618847	0.035356343685646566	80.48387096774194	341.7935690237759	TTN
GO Biological Processes	Chromosome Condensation (GO:0030261)	0.014310901015618847	0.035356343685646566	80.48387096774194	341.7935690237759	TTN
GO Biological Processes	Cardiac Muscle Contraction (GO:0060048)	0.014755169717842366	0.0354124	77.9648	328.7123934869669	TTN
GO Biological Processes	Regulation Of calcineurin-NFAT Signaling Cascade (GO:0070884)	0.0151993	0.035464941062929425	75.59848484848484	316.4936999007962	PPP3R1
GO Biological Processes	mRNA Transcription By RNA Polymerase II (GO:0042789)	0.016973844995694702	0.0375211	67.41216216216216	274.77747713172664	TAF8
GO Biological Processes	Positive Regulation Of Cation Channel Activity (GO:2001259)	0.016973844995694702	0.0375211	67.41216216216216	274.77747713172664	PPP3R1
GO Biological Processes	Heart Contraction (GO:0060047)	0.0183029	0.0393122	62.3469	249.43081801374976	TTN
GO Biological Processes	Positive Regulation Of Calcium Ion Transmembrane Transport (GO:1904427)	0.018745587009027256	0.0393122	60.823170731707314	241.88139765251202	PPP3R1
GO Biological Processes	mRNA Transcription (GO:0009299)	0.0191881	0.0393122	59.37202380952381	234.72528267100722	TAF8
GO Biological Processes	Myofibril Assembly (GO:0030239)	0.020514490407793847	0.041028980815587694	55.40555555555556	215.34055050751047	TTN
GO Biological Processes	Positive Regulation Of Transcription Initiation By RNA Polymerase II (GO:0060261)	0.023162531706899355	0.043225197319884126	48.872549019607845	184.01586571209845	TAF8
GO Biological Processes	Cardiac Muscle Tissue Development (GO:0048738)	0.023162531706899355	0.043225197319884126	48.872549019607845	184.01586571209845	TTN
GO Biological Processes	RNA Polymerase II Preinitiation Complex Assembly (GO:0051123)	0.024924355773343985	0.043225197319884126	45.30909090909091	167.27707721282206	TAF8
GO Biological Processes	Positive Regulation Of DNA-templated Transcription Initiation (GO:2000144)	0.024924355773343985	0.043225197319884126	45.30909090909091	167.27707721282206	TAF8
GO Biological Processes	Striated Muscle Contraction (GO:0006941)	0.025364370254955197	0.043225197319884126	44.497767857142854	163.5030358762894	TTN
GO Biological Processes	Regulation Of Transcription Initiation By RNA Polymerase II (GO:0060260)	0.025364370254955197	0.043225197319884126	44.497767857142854	163.5030358762894	TAF8
GO Biological Processes	Transcription Preinitiation Complex Assembly (GO:0070897)	0.026243869801358222	0.043225197319884126	42.95905172413793	156.38481754531216	TAF8
GO Biological Processes	DNA-templated Transcription Initiation (GO:0006352)	0.026243869801358222	0.043225197319884126	42.95905172413793	156.38481754531216	TAF8
GO Biological Processes	Heart Morphogenesis (GO:0003007)	0.026243869801358222	0.043225197319884126	42.95905172413793	156.38481754531216	TTN
GO Biological Processes	Response To Metal Ion (GO:0010038)	0.0284395	0.0459408	39.53968253968254	140.7602846691535	TTN
GO Biological Processes	Positive Regulation Of Protein Transport (GO:0051222)	0.0310685	0.0492407	36.09057971014493	125.29061959707016	TTN
GO Biological Processes	Positive Regulation Of Secretion By Cell (GO:1903532)	0.0323806	0.0494263	34.58159722222222	118.62160586885466	TTN
GO Biological Processes	Regulation Of Fat Cell Differentiation (GO:0045598)	0.0332545	0.0494263	33.64358108108108	114.5081106084989	TAF8
GO Biological Processes	Transcription Initiation At RNA Polymerase II Promoter (GO:0006367)	0.0336912	0.0494263	33.193333333333335	112.54263179248726	TAF8
GO Biological Processes	Positive Regulation Of Protein Secretion (GO:0050714)	0.0336912	0.0494263	33.193333333333335	112.54263179248726	TTN
GO Biological Processes	Actomyosin Structure Organization (GO:0031032)	0.0341277	0.0494263	32.754934210526315	110.63459017539783	TTN
GO Molecular Function	Calcium-Dependent Protein Serine/Threonine Phosphatase Activity (GO:0004723)	0.00269726	0.022926675455270544	499.65	2955.689739283532	PPP3R1
GO Molecular Function	Telethonin Binding (GO:0031433)	0.00269726	0.022926675455270544	499.65	2955.689739283532	TTN
GO Molecular Function	Muscle Alpha-Actinin Binding (GO:0051371)	0.00628356	0.0250251	192.09615384615384	973.8925197668605	TTN
GO Molecular Function	Actinin Binding (GO:0042805)	0.00896577	0.0250251	131.39473684210526	619.44	TTN
GO Molecular Function	Calcium Ion Binding (GO:0005509)	0.00991381	0.0250251	16.318106312292358	75.28891981249254	PPP3R1;TTN
GO Molecular Function	Alpha-Actinin Binding (GO:0051393)	0.010304464378507131	0.0250251	113.46022727272727	519.1007405544717	TTN
GO Molecular Function	Cyclosporin A Binding (GO:0016018)	0.010304464378507131	0.0250251	113.46022727272727	519.1007405544717	PPP3R1
GO Molecular Function	Metal Ion Binding (GO:0046872)	0.021596958691857012	0.0458935	10.719515551885493	41.11151579669636	PPP3R1;TTN
GO Molecular Function	Protein Serine/Threonine Phosphatase Activity (GO:0004722)	0.024484164739851953	0.0461085	46.15046296296296	171.20569732025402	PPP3R1
GO Molecular Function	Protein Phosphatase Regulator Activity (GO:0019888)	0.027122663879516524	0.0461085	41.52291666666667	149.78917144936761	PPP3R1
