# Supplementary material for: Archaic Adaptive Introgression in Modern Human Reproductive Genes
Source: Research Square preprint supplement (doi:10.21203/rs.3.rs-5544119/v1), 2025-03-19
Supplement: Supplementary file 5 [file 3e1521940dd311699aa50d2b.xlsx]

## Sheet: README
README: Archaic segments that overlap a previously reported gene in Greer et al. (2021). Variants in these segments are also >=40% allele frequency within at least one population and directly match the archaic allele. The segments include intersection and gene annotation results. Each archaic sample has its own tab for simplicity due to the size of the table and to show differences in the introgr…

## Sheet: Altai
Population	Chromosomal Segment	Position	Variant ID	Archaic Allele Frequency	Average Segment Allele Frequency	Maximum Allele Frequency of Segment	snpEff Gene	snpEff Gene ID	Matching Population	Matching Population Archaic Allele Frequency	Matching Population Average Segment Allele Frequency	Matching Population Maximum Allele Frequency of Segment
Karitiana	chr1:165199987-165908152	165526093	rs76111428	0.416667	0.158737	0.416667	LRRC52-AS1	ENSG00000237463	Colombian	0.214286	0.222286	0.5
Karitiana	chr1:165199987-165908152	165526093	rs76111428	0.416667	0.158737	0.416667	LRRC52-AS1	ENSG00000237463	Maya	0.214286	0.215617	0.333333
Karitiana	chr1:165199987-165908152	165526093	rs76111428	0.416667	0.158737	0.416667	LRRC52-AS1	ENSG00000237463	Pima	0.428571	0.262723	0.535714
Karitiana	chr1:165199987-165908152	165526093	rs76111428	0.416667	0.158737	0.416667	LRRC52-AS1	ENSG00000237463	Surui	0.5	0.5	0.5
Karitiana	chr1:165199987-165908152	165528135	rs116996797	0.416667	0.158737	0.416667	LRRC52-AS1	ENSG00000237463	Colombian	0.214286	0.222286	0.5
Karitiana	chr1:165199987-165908152	165528135	rs116996797	0.416667	0.158737	0.416667	LRRC52-AS1	ENSG00000237463	Maya	0.214286	0.215617	0.333333
Karitiana	chr1:165199987-165908152	165528135	rs116996797	0.416667	0.158737	0.416667	LRRC52-AS1	ENSG00000237463	PEL	0.294118	0.191816	0.3
Karitiana	chr1:165199987-165908152	165528135	rs116996797	0.416667	0.158737	0.416667	LRRC52-AS1	ENSG00000237463	Pima	0.428571	0.262723	0.535714
Karitiana	chr1:165199987-165908152	165528135	rs116996797	0.416667	0.158737	0.416667	LRRC52-AS1	ENSG00000237463	Surui	0.5	0.5	0.5
Karitiana	chr1:165199987-165908152	165532295	rs77083172	0.416667	0.158737	0.416667	LRRC52-AS1	ENSG00000237463	Colombian	0.214286	0.222286	0.5
Karitiana	chr1:165199987-165908152	165532295	rs77083172	0.416667	0.158737	0.416667	LRRC52-AS1	ENSG00000237463	Maya	0.214286	0.215617	0.333333
Karitiana	chr1:165199987-165908152	165532295	rs77083172	0.416667	0.158737	0.416667	LRRC52-AS1	ENSG00000237463	PEL	0.294118	0.191816	0.3
Karitiana	chr1:165199987-165908152	165532295	rs77083172	0.416667	0.158737	0.416667	LRRC52-AS1	ENSG00000237463	Pima	0.428571	0.262723	0.535714
Karitiana	chr1:165199987-165908152	165532295	rs77083172	0.416667	0.158737	0.416667	LRRC52-AS1	ENSG00000237463	Surui	0.5	0.5	0.5
Surui	chr1:165471471-165806290	165526093	rs76111428	0.5	0.5	0.5	LRRC52-AS1	ENSG00000237463	Colombian	0.214286	0.222286	0.5
Surui	chr1:165471471-165806290	165526093	rs76111428	0.5	0.5	0.5	LRRC52-AS1	ENSG00000237463	Karitiana	0.416667	0.158737	0.416667
Surui	chr1:165471471-165806290	165526093	rs76111428	0.5	0.5	0.5	LRRC52-AS1	ENSG00000237463	Maya	0.214286	0.215617	0.333333
Surui	chr1:165471471-165806290	165526093	rs76111428	0.5	0.5	0.5	LRRC52-AS1	ENSG00000237463	Pima	0.428571	0.262723	0.535714
Surui	chr1:165471471-165806290	165528135	rs116996797	0.5	0.5	0.5	LRRC52-AS1	ENSG00000237463	Colombian	0.214286	0.222286	0.5
Surui	chr1:165471471-165806290	165528135	rs116996797	0.5	0.5	0.5	LRRC52-AS1	ENSG00000237463	Karitiana	0.416667	0.158737	0.416667
Surui	chr1:165471471-165806290	165528135	rs116996797	0.5	0.5	0.5	LRRC52-AS1	ENSG00000237463	Maya	0.214286	0.215617	0.333333
Surui	chr1:165471471-165806290	165528135	rs116996797	0.5	0.5	0.5	LRRC52-AS1	ENSG00000237463	PEL	0.294118	0.191816	0.3
Surui	chr1:165471471-165806290	165528135	rs116996797	0.5	0.5	0.5	LRRC52-AS1	ENSG00000237463	Pima	0.428571	0.262723	0.535714
Surui	chr1:165471471-165806290	165532295	rs77083172	0.5	0.5	0.5	LRRC52-AS1	ENSG00000237463	Colombian	0.214286	0.222286	0.5
Surui	chr1:165471471-165806290	165532295	rs77083172	0.5	0.5	0.5	LRRC52-AS1	ENSG00000237463	Karitiana	0.416667	0.158737	0.416667
Surui	chr1:165471471-165806290	165532295	rs77083172	0.5	0.5	0.5	LRRC52-AS1	ENSG00000237463	Maya	0.214286	0.215617	0.333333
Surui	chr1:165471471-165806290	165532295	rs77083172	0.5	0.5	0.5	LRRC52-AS1	ENSG00000237463	PEL	0.294118	0.191816	0.3
Surui	chr1:165471471-165806290	165532295	rs77083172	0.5	0.5	0.5	LRRC52-AS1	ENSG00000237463	Pima	0.428571	0.262723	0.535714
Miao	chr1:212649295-212759493	212738835	rs3806460	0.4	0.407627	0.45	ENSG00000288007	ENSG00000288007	CHB	0.427184	0.111005	0.446602
Miao	chr1:212649295-212759493	212738835	rs3806460	0.4	0.407627	0.45	ENSG00000288007	ENSG00000288007	CHS	0.404762	0.36853	0.428571
Miao	chr1:212649295-212759493	212738835	rs3806460	0.4	0.407627	0.45	ENSG00000288007	ENSG00000288007	Cambodian	0.3	0.276562	0.35
Miao	chr1:212649295-212759493	212738835	rs3806460	0.4	0.407627	0.45	ENSG00000288007	ENSG00000288007	Colombian	0.5	0.526157	0.642857
Miao	chr1:212649295-212759493	212738835	rs3806460	0.4	0.407627	0.45	ENSG00000288007	ENSG00000288007	Dai	0.277778	0.186806	0.277778
Miao	chr1:212649295-212759493	212738835	rs3806460	0.4	0.407627	0.45	ENSG00000288007	ENSG00000288007	Daur	0.444444	0.317938	0.444444
Miao	chr1:212649295-212759493	212738835	rs3806460	0.4	0.407627	0.45	ENSG00000288007	ENSG00000288007	Hezhen	0.388889	0.258454	0.388889
Miao	chr1:212649295-212759493	212738835	rs3806460	0.4	0.407627	0.45	ENSG00000288007	ENSG00000288007	JPT	0.27451	0.225703	0.284314
Miao	chr1:212649295-212759493	212738835	rs3806460	0.4	0.407627	0.45	ENSG00000288007	ENSG00000288007	Japanese	0.339286	0.233705	0.357143
Miao	chr1:212649295-212759493	212738835	rs3806460	0.4	0.407627	0.45	ENSG00000288007	ENSG00000288007	KHV	0.30303	0.284731	0.328283
Miao	chr1:212649295-212759493	212738835	rs3806460	0.4	0.407627	0.45	ENSG00000288007	ENSG00000288007	Karitiana	0.416667	0.328767	0.541667
Miao	chr1:212649295-212759493	212738835	rs3806460	0.4	0.407627	0.45	ENSG00000288007	ENSG00000288007	MXL	0.28125	0.245811	0.28125
Miao	chr1:212649295-212759493	212738835	rs3806460	0.4	0.407627	0.45	ENSG00000288007	ENSG00000288007	Maya	0.547619	0.540241	0.666667
Miao	chr1:212649295-212759493	212738835	rs3806460	0.4	0.407627	0.45	ENSG00000288007	ENSG00000288007	Mongola	0.4	0.305556	0.4
Miao	chr1:212649295-212759493	212738835	rs3806460	0.4	0.407627	0.45	ENSG00000288007	ENSG00000288007	Naxi	0.5	0.45873	0.5
Miao	chr1:212649295-212759493	212738835	rs3806460	0.4	0.407627	0.45	ENSG00000288007	ENSG00000288007	PEL	0.417647	0.421541	0.511765
Miao	chr1:212649295-212759493	212738835	rs3806460	0.4	0.407627	0.45	ENSG00000288007	ENSG00000288007	Pima	0.464286	0.349207	0.571429
Miao	chr1:212649295-212759493	212738835	rs3806460	0.4	0.407627	0.45	ENSG00000288007	ENSG00000288007	Surui	0.75	0.75	0.75
Miao	chr1:212649295-212759493	212738835	rs3806460	0.4	0.407627	0.45	ENSG00000288007	ENSG00000288007	Tu	0.3125	0.200868	0.375
Miao	chr1:212649295-212759493	212738835	rs3806460	0.4	0.407627	0.45	ENSG00000288007	ENSG00000288007	Uygur	0.25	0.239943	0.25
Miao	chr1:212649295-212759493	212738835	rs3806460	0.4	0.407627	0.45	ENSG00000288007	ENSG00000288007	Xibo	0.277778	0.0918274	0.333333
Miao	chr1:212649295-212759493	212738835	rs3806460	0.4	0.407627	0.45	ENSG00000288007	ENSG00000288007	Yakut	0.26	0.272857	0.3
Miao	chr1:212649295-212759493	212741763	rs11119974	0.4	0.407627	0.45	ATF3	ENSG00000162772	CHB	0.427184	0.111005	0.446602
Miao	chr1:212649295-212759493	212741763	rs11119974	0.4	0.407627	0.45	ATF3	ENSG00000162772	CHS	0.404762	0.36853	0.428571
Miao	chr1:212649295-212759493	212741763	rs11119974	0.4	0.407627	0.45	ATF3	ENSG00000162772	Cambodian	0.3	0.276562	0.35
Miao	chr1:212649295-212759493	212741763	rs11119974	0.4	0.407627	0.45	ATF3	ENSG00000162772	Colombian	0.5	0.526157	0.642857
Miao	chr1:212649295-212759493	212741763	rs11119974	0.4	0.407627	0.45	ATF3	ENSG00000162772	Dai	0.277778	0.186806	0.277778
Miao	chr1:212649295-212759493	212741763	rs11119974	0.4	0.407627	0.45	ATF3	ENSG00000162772	Daur	0.444444	0.317938	0.444444
Miao	chr1:212649295-212759493	212741763	rs11119974	0.4	0.407627	0.45	ATF3	ENSG00000162772	Hezhen	0.388889	0.258454	0.388889
Miao	chr1:212649295-212759493	212741763	rs11119974	0.4	0.407627	0.45	ATF3	ENSG00000162772	JPT	0.27451	0.225703	0.284314
Miao	chr1:212649295-212759493	212741763	rs11119974	0.4	0.407627	0.45	ATF3	ENSG00000162772	Japanese	0.339286	0.233705	0.357143
Miao	chr1:212649295-212759493	212741763	rs11119974	0.4	0.407627	0.45	ATF3	ENSG00000162772	KHV	0.30303	0.284731	0.328283
Miao	chr1:212649295-212759493	212741763	rs11119974	0.4	0.407627	0.45	ATF3	ENSG00000162772	Karitiana	0.416667	0.328767	0.541667
Miao	chr1:212649295-212759493	212741763	rs11119974	0.4	0.407627	0.45	ATF3	ENSG00000162772	MXL	0.28125	0.245811	0.28125
Miao	chr1:212649295-212759493	212741763	rs11119974	0.4	0.407627	0.45	ATF3	ENSG00000162772	Maya	0.547619	0.540241	0.666667
Miao	chr1:212649295-212759493	212741763	rs11119974	0.4	0.407627	0.45	ATF3	ENSG00000162772	Mongola	0.4	0.305556	0.4
Miao	chr1:212649295-212759493	212741763	rs11119974	0.4	0.407627	0.45	ATF3	ENSG00000162772	Naxi	0.5	0.45873	0.5
Miao	chr1:212649295-212759493	212741763	rs11119974	0.4	0.407627	0.45	ATF3	ENSG00000162772	PEL	0.417647	0.421541	0.511765
Miao	chr1:212649295-212759493	212741763	rs11119974	0.4	0.407627	0.45	ATF3	ENSG00000162772	Pima	0.464286	0.349207	0.571429
Miao	chr1:212649295-212759493	212741763	rs11119974	0.4	0.407627	0.45	ATF3	ENSG00000162772	Surui	0.75	0.75	0.75
Miao	chr1:212649295-212759493	212741763	rs11119974	0.4	0.407627	0.45	ATF3	ENSG00000162772	Tu	0.3125	0.200868	0.375
Miao	chr1:212649295-212759493	212741763	rs11119974	0.4	0.407627	0.45	ATF3	ENSG00000162772	Uygur	0.25	0.239943	0.25
Miao	chr1:212649295-212759493	212741763	rs11119974	0.4	0.407627	0.45	ATF3	ENSG00000162772	Xibo	0.277778	0.0918274	0.333333
Miao	chr1:212649295-212759493	212741763	rs11119974	0.4	0.407627	0.45	ATF3	ENSG00000162772	Yakut	0.26	0.272857	0.3
Miao	chr1:212649295-212759493	212742400	rs10863980	0.4	0.407627	0.45	ATF3	ENSG00000162772	CHB	0.427184	0.111005	0.446602
Miao	chr1:212649295-212759493	212742400	rs10863980	0.4	0.407627	0.45	ATF3	ENSG00000162772	CHS	0.404762	0.36853	0.428571
Miao	chr1:212649295-212759493	212742400	rs10863980	0.4	0.407627	0.45	ATF3	ENSG00000162772	Cambodian	0.3	0.276562	0.35
Miao	chr1:212649295-212759493	212742400	rs10863980	0.4	0.407627	0.45	ATF3	ENSG00000162772	Colombian	0.5	0.526157	0.642857
Miao	chr1:212649295-212759493	212742400	rs10863980	0.4	0.407627	0.45	ATF3	ENSG00000162772	Dai	0.277778	0.186806	0.277778
Miao	chr1:212649295-212759493	212742400	rs10863980	0.4	0.407627	0.45	ATF3	ENSG00000162772	Daur	0.444444	0.317938	0.444444
Miao	chr1:212649295-212759493	212742400	rs10863980	0.4	0.407627	0.45	ATF3	ENSG00000162772	Hezhen	0.388889	0.258454	0.388889
Miao	chr1:212649295-212759493	212742400	rs10863980	0.4	0.407627	0.45	ATF3	ENSG00000162772	JPT	0.27451	0.225703	0.284314
Miao	chr1:212649295-212759493	212742400	rs10863980	0.4	0.407627	0.45	ATF3	ENSG00000162772	Japanese	0.339286	0.233705	0.357143
Miao	chr1:212649295-212759493	212742400	rs10863980	0.4	0.407627	0.45	ATF3	ENSG00000162772	KHV	0.30303	0.284731	0.328283
Miao	chr1:212649295-212759493	212742400	rs10863980	0.4	0.407627	0.45	ATF3	ENSG00000162772	Karitiana	0.416667	0.328767	0.541667
Miao	chr1:212649295-212759493	212742400	rs10863980	0.4	0.407627	0.45	ATF3	ENSG00000162772	MXL	0.28125	0.245811	0.28125
Miao	chr1:212649295-212759493	212742400	rs10863980	0.4	0.407627	0.45	ATF3	ENSG00000162772	Maya	0.547619	0.540241	0.666667
Miao	chr1:212649295-212759493	212742400	rs10863980	0.4	0.407627	0.45	ATF3	ENSG00000162772	Mongola	0.4	0.305556	0.4
Miao	chr1:212649295-212759493	212742400	rs10863980	0.4	0.407627	0.45	ATF3	ENSG00000162772	Naxi	0.5	0.45873	0.5
Miao	chr1:212649295-212759493	212742400	rs10863980	0.4	0.407627	0.45	ATF3	ENSG00000162772	PEL	0.417647	0.421541	0.511765
Miao	chr1:212649295-212759493	212742400	rs10863980	0.4	0.407627	0.45	ATF3	ENSG00000162772	Pima	0.464286	0.349207	0.571429
Miao	chr1:212649295-212759493	212742400	rs10863980	0.4	0.407627	0.45	ATF3	ENSG00000162772	Surui	0.75	0.75	0.75
Miao	chr1:212649295-212759493	212742400	rs10863980	0.4	0.407627	0.45	ATF3	ENSG00000162772	Tu	0.3125	0.200868	0.375
Miao	chr1:212649295-212759493	212742400	rs10863980	0.4	0.407627	0.45	ATF3	ENSG00000162772	Uygur	0.25	0.239943	0.25
Miao	chr1:212649295-212759493	212742400	rs10863980	0.4	0.407627	0.45	ATF3	ENSG00000162772	Xibo	0.277778	0.0918274	0.333333
Miao	chr1:212649295-212759493	212742400	rs10863980	0.4	0.407627	0.45	ATF3	ENSG00000162772	Yakut	0.26	0.272857	0.3
Miao	chr1:212649295-212759493	212742675	rs4951613	0.4	0.407627	0.45	ATF3	ENSG00000162772	CHB	0.427184	0.111005	0.446602
Miao	chr1:212649295-212759493	212742675	rs4951613	0.4	0.407627	0.45	ATF3	ENSG00000162772	CHS	0.404762	0.36853	0.428571
Miao	chr1:212649295-212759493	212742675	rs4951613	0.4	0.407627	0.45	ATF3	ENSG00000162772	Cambodian	0.3	0.276562	0.35
Miao	chr1:212649295-212759493	212742675	rs4951613	0.4	0.407627	0.45	ATF3	ENSG00000162772	Colombian	0.5	0.526157	0.642857
Miao	chr1:212649295-212759493	212742675	rs4951613	0.4	0.407627	0.45	ATF3	ENSG00000162772	Dai	0.277778	0.186806	0.277778
Miao	chr1:212649295-212759493	212742675	rs4951613	0.4	0.407627	0.45	ATF3	ENSG00000162772	Daur	0.444444	0.317938	0.444444
Miao	chr1:212649295-212759493	212742675	rs4951613	0.4	0.407627	0.45	ATF3	ENSG00000162772	Hezhen	0.388889	0.258454	0.388889
Miao	chr1:212649295-212759493	212742675	rs4951613	0.4	0.407627	0.45	ATF3	ENSG00000162772	JPT	0.27451	0.225703	0.284314
Miao	chr1:212649295-212759493	212742675	rs4951613	0.4	0.407627	0.45	ATF3	ENSG00000162772	Japanese	0.339286	0.233705	0.357143
Miao	chr1:212649295-212759493	212742675	rs4951613	0.4	0.407627	0.45	ATF3	ENSG00000162772	KHV	0.30303	0.284731	0.328283
Miao	chr1:212649295-212759493	212742675	rs4951613	0.4	0.407627	0.45	ATF3	ENSG00000162772	Karitiana	0.416667	0.328767	0.541667
Miao	chr1:212649295-212759493	212742675	rs4951613	0.4	0.407627	0.45	ATF3	ENSG00000162772	MXL	0.28125	0.245811	0.28125
Miao	chr1:212649295-212759493	212742675	rs4951613	0.4	0.407627	0.45	ATF3	ENSG00000162772	Maya	0.547619	0.540241	0.666667
Miao	chr1:212649295-212759493	212742675	rs4951613	0.4	0.407627	0.45	ATF3	ENSG00000162772	Mongola	0.4	0.305556	0.4
Miao	chr1:212649295-212759493	212742675	rs4951613	0.4	0.407627	0.45	ATF3	ENSG00000162772	Naxi	0.5	0.45873	0.5
Miao	chr1:212649295-212759493	212742675	rs4951613	0.4	0.407627	0.45	ATF3	ENSG00000162772	PEL	0.417647	0.421541	0.511765
Miao	chr1:212649295-212759493	212742675	rs4951613	0.4	0.407627	0.45	ATF3	ENSG00000162772	Pima	0.464286	0.349207	0.571429
Miao	chr1:212649295-212759493	212742675	rs4951613	0.4	0.407627	0.45	ATF3	ENSG00000162772	Surui	0.75	0.75	0.75
Miao	chr1:212649295-212759493	212742675	rs4951613	0.4	0.407627	0.45	ATF3	ENSG00000162772	Tu	0.3125	0.200868	0.375
Miao	chr1:212649295-212759493	212742675	rs4951613	0.4	0.407627	0.45	ATF3	ENSG00000162772	Uygur	0.25	0.239943	0.25
Miao	chr1:212649295-212759493	212742675	rs4951613	0.4	0.407627	0.45	ATF3	ENSG00000162772	Xibo	0.277778	0.0918274	0.333333
Miao	chr1:212649295-212759493	212742675	rs4951613	0.4	0.407627	0.45	ATF3	ENSG00000162772	Yakut	0.26	0.272857	0.3
Miao	chr1:212649295-212759493	212744370	rs12038766	0.4	0.407627	0.45	ATF3	ENSG00000162772	CHB	0.427184	0.111005	0.446602
Miao	chr1:212649295-212759493	212744370	rs12038766	0.4	0.407627	0.45	ATF3	ENSG00000162772	CHS	0.404762	0.36853	0.428571
Miao	chr1:212649295-212759493	212744370	rs12038766	0.4	0.407627	0.45	ATF3	ENSG00000162772	Colombian	0.5	0.526157	0.642857
Miao	chr1:212649295-212759493	212744370	rs12038766	0.4	0.407627	0.45	ATF3	ENSG00000162772	Dai	0.277778	0.186806	0.277778
Miao	chr1:212649295-212759493	212744370	rs12038766	0.4	0.407627	0.45	ATF3	ENSG00000162772	Daur	0.444444	0.317938	0.444444
Miao	chr1:212649295-212759493	212744370	rs12038766	0.4	0.407627	0.45	ATF3	ENSG00000162772	Hezhen	0.388889	0.258454	0.388889
Miao	chr1:212649295-212759493	212744370	rs12038766	0.4	0.407627	0.45	ATF3	ENSG00000162772	JPT	0.27451	0.225703	0.284314
Miao	chr1:212649295-212759493	212744370	rs12038766	0.4	0.407627	0.45	ATF3	ENSG00000162772	Japanese	0.339286	0.233705	0.357143
Miao	chr1:212649295-212759493	212744370	rs12038766	0.4	0.407627	0.45	ATF3	ENSG00000162772	KHV	0.30303	0.284731	0.328283
Miao	chr1:212649295-212759493	212744370	rs12038766	0.4	0.407627	0.45	ATF3	ENSG00000162772	Karitiana	0.416667	0.328767	0.541667
Miao	chr1:212649295-212759493	212744370	rs12038766	0.4	0.407627	0.45	ATF3	ENSG00000162772	MXL	0.28125	0.245811	0.28125
Miao	chr1:212649295-212759493	212744370	rs12038766	0.4	0.407627	0.45	ATF3	ENSG00000162772	Mongola	0.4	0.305556	0.4
Miao	chr1:212649295-212759493	212744370	rs12038766	0.4	0.407627	0.45	ATF3	ENSG00000162772	Naxi	0.5	0.45873	0.5
Miao	chr1:212649295-212759493	212744370	rs12038766	0.4	0.407627	0.45	ATF3	ENSG00000162772	PEL	0.417647	0.421541	0.511765
Miao	chr1:212649295-212759493	212744370	rs12038766	0.4	0.407627	0.45	ATF3	ENSG00000162772	Pima	0.464286	0.349207	0.571429
Miao	chr1:212649295-212759493	212744370	rs12038766	0.4	0.407627	0.45	ATF3	ENSG00000162772	Surui	0.75	0.75	0.75
Miao	chr1:212649295-212759493	212744370	rs12038766	0.4	0.407627	0.45	ATF3	ENSG00000162772	Tu	0.3125	0.200868	0.375
Miao	chr1:212649295-212759493	212744370	rs12038766	0.4	0.407627	0.45	ATF3	ENSG00000162772	Uygur	0.25	0.239943	0.25
Miao	chr1:212649295-212759493	212744370	rs12038766	0.4	0.407627	0.45	ATF3	ENSG00000162772	Xibo	0.277778	0.0918274	0.333333
Miao	chr1:212649295-212759493	212744370	rs12038766	0.4	0.407627	0.45	ATF3	ENSG00000162772	Yakut	0.26	0.272857	0.3
Miao	chr1:212649295-212759493	212747722	rs11119975	0.4	0.407627	0.45	ATF3	ENSG00000162772	CHB	0.427184	0.111005	0.446602
Miao	chr1:212649295-212759493	212747722	rs11119975	0.4	0.407627	0.45	ATF3	ENSG00000162772	CHS	0.404762	0.36853	0.428571
Miao	chr1:212649295-212759493	212747722	rs11119975	0.4	0.407627	0.45	ATF3	ENSG00000162772	Colombian	0.5	0.526157	0.642857
Miao	chr1:212649295-212759493	212747722	rs11119975	0.4	0.407627	0.45	ATF3	ENSG00000162772	Dai	0.277778	0.186806	0.277778
Miao	chr1:212649295-212759493	212747722	rs11119975	0.4	0.407627	0.45	ATF3	ENSG00000162772	Daur	0.444444	0.317938	0.444444
Miao	chr1:212649295-212759493	212747722	rs11119975	0.4	0.407627	0.45	ATF3	ENSG00000162772	Hezhen	0.388889	0.258454	0.388889
Miao	chr1:212649295-212759493	212747722	rs11119975	0.4	0.407627	0.45	ATF3	ENSG00000162772	JPT	0.27451	0.225703	0.284314
Miao	chr1:212649295-212759493	212747722	rs11119975	0.4	0.407627	0.45	ATF3	ENSG00000162772	Japanese	0.321429	0.233705	0.357143
Miao	chr1:212649295-212759493	212747722	rs11119975	0.4	0.407627	0.45	ATF3	ENSG00000162772	KHV	0.30303	0.284731	0.328283
Miao	chr1:212649295-212759493	212747722	rs11119975	0.4	0.407627	0.45	ATF3	ENSG00000162772	Karitiana	0.416667	0.328767	0.541667
Miao	chr1:212649295-212759493	212747722	rs11119975	0.4	0.407627	0.45	ATF3	ENSG00000162772	MXL	0.273438	0.245811	0.28125
Miao	chr1:212649295-212759493	212747722	rs11119975	0.4	0.407627	0.45	ATF3	ENSG00000162772	Maya	0.547619	0.540241	0.666667
Miao	chr1:212649295-212759493	212747722	rs11119975	0.4	0.407627	0.45	ATF3	ENSG00000162772	Mongola	0.4	0.305556	0.4
Miao	chr1:212649295-212759493	212747722	rs11119975	0.4	0.407627	0.45	ATF3	ENSG00000162772	Naxi	0.5	0.45873	0.5
Miao	chr1:212649295-212759493	212747722	rs11119975	0.4	0.407627	0.45	ATF3	ENSG00000162772	PEL	0.411765	0.421541	0.511765
Miao	chr1:212649295-212759493	212747722	rs11119975	0.4	0.407627	0.45	ATF3	ENSG00000162772	Pima	0.464286	0.349207	0.571429
Miao	chr1:212649295-212759493	212747722	rs11119975	0.4	0.407627	0.45	ATF3	ENSG00000162772	Surui	0.75	0.75	0.75
Miao	chr1:212649295-212759493	212747722	rs11119975	0.4	0.407627	0.45	ATF3	ENSG00000162772	Tu	0.3125	0.200868	0.375
Miao	chr1:212649295-212759493	212747722	rs11119975	0.4	0.407627	0.45	ATF3	ENSG00000162772	Xibo	0.277778	0.0918274	0.333333
Miao	chr1:212649295-212759493	212747722	rs11119975	0.4	0.407627	0.45	ATF3	ENSG00000162772	Yakut	0.26	0.272857	0.3
Naxi	chr1:212649295-212798601	212738835	rs3806460	0.5	0.45873	0.5	ENSG00000288007	ENSG00000288007	CHB	0.427184	0.111005	0.446602
Naxi	chr1:212649295-212798601	212738835	rs3806460	0.5	0.45873	0.5	ENSG00000288007	ENSG00000288007	CHS	0.404762	0.36853	0.428571
Naxi	chr1:212649295-212798601	212738835	rs3806460	0.5	0.45873	0.5	ENSG00000288007	ENSG00000288007	Cambodian	0.3	0.276562	0.35
Naxi	chr1:212649295-212798601	212738835	rs3806460	0.5	0.45873	0.5	ENSG00000288007	ENSG00000288007	Colombian	0.5	0.526157	0.642857
Naxi	chr1:212649295-212798601	212738835	rs3806460	0.5	0.45873	0.5	ENSG00000288007	ENSG00000288007	Dai	0.277778	0.186806	0.277778
Naxi	chr1:212649295-212798601	212738835	rs3806460	0.5	0.45873	0.5	ENSG00000288007	ENSG00000288007	Daur	0.444444	0.317938	0.444444
Naxi	chr1:212649295-212798601	212738835	rs3806460	0.5	0.45873	0.5	ENSG00000288007	ENSG00000288007	Hezhen	0.388889	0.258454	0.388889
Naxi	chr1:212649295-212798601	212738835	rs3806460	0.5	0.45873	0.5	ENSG00000288007	ENSG00000288007	JPT	0.27451	0.225703	0.284314
Naxi	chr1:212649295-212798601	212738835	rs3806460	0.5	0.45873	0.5	ENSG00000288007	ENSG00000288007	Japanese	0.339286	0.233705	0.357143
Naxi	chr1:212649295-212798601	212738835	rs3806460	0.5	0.45873	0.5	ENSG00000288007	ENSG00000288007	KHV	0.30303	0.284731	0.328283
Naxi	chr1:212649295-212798601	212738835	rs3806460	0.5	0.45873	0.5	ENSG00000288007	ENSG00000288007	Karitiana	0.416667	0.328767	0.541667
Naxi	chr1:212649295-212798601	212738835	rs3806460	0.5	0.45873	0.5	ENSG00000288007	ENSG00000288007	MXL	0.28125	0.245811	0.28125
Naxi	chr1:212649295-212798601	212738835	rs3806460	0.5	0.45873	0.5	ENSG00000288007	ENSG00000288007	Maya	0.547619	0.540241	0.666667
Naxi	chr1:212649295-212798601	212738835	rs3806460	0.5	0.45873	0.5	ENSG00000288007	ENSG00000288007	Miao	0.4	0.407627	0.45
Naxi	chr1:212649295-212798601	212738835	rs3806460	0.5	0.45873	0.5	ENSG00000288007	ENSG00000288007	Mongola	0.4	0.305556	0.4
Naxi	chr1:212649295-212798601	212738835	rs3806460	0.5	0.45873	0.5	ENSG00000288007	ENSG00000288007	PEL	0.417647	0.421541	0.511765
Naxi	chr1:212649295-212798601	212738835	rs3806460	0.5	0.45873	0.5	ENSG00000288007	ENSG00000288007	Pima	0.464286	0.349207	0.571429
Naxi	chr1:212649295-212798601	212738835	rs3806460	0.5	0.45873	0.5	ENSG00000288007	ENSG00000288007	Surui	0.75	0.75	0.75
Naxi	chr1:212649295-212798601	212738835	rs3806460	0.5	0.45873	0.5	ENSG00000288007	ENSG00000288007	Tu	0.3125	0.200868	0.375
Naxi	chr1:212649295-212798601	212738835	rs3806460	0.5	0.45873	0.5	ENSG00000288007	ENSG00000288007	Uygur	0.25	0.239943	0.25
Naxi	chr1:212649295-212798601	212738835	rs3806460	0.5	0.45873	0.5	ENSG00000288007	ENSG00000288007	Xibo	0.277778	0.0918274	0.333333
Naxi	chr1:212649295-212798601	212738835	rs3806460	0.5	0.45873	0.5	ENSG00000288007	ENSG00000288007	Yakut	0.26	0.272857	0.3
Naxi	chr1:212649295-212798601	212741763	rs11119974	0.5	0.45873	0.5	ATF3	ENSG00000162772	CHB	0.427184	0.111005	0.446602
Naxi	chr1:212649295-212798601	212741763	rs11119974	0.5	0.45873	0.5	ATF3	ENSG00000162772	CHS	0.404762	0.36853	0.428571
Naxi	chr1:212649295-212798601	212741763	rs11119974	0.5	0.45873	0.5	ATF3	ENSG00000162772	Cambodian	0.3	0.276562	0.35
Naxi	chr1:212649295-212798601	212741763	rs11119974	0.5	0.45873	0.5	ATF3	ENSG00000162772	Colombian	0.5	0.526157	0.642857
Naxi	chr1:212649295-212798601	212741763	rs11119974	0.5	0.45873	0.5	ATF3	ENSG00000162772	Dai	0.277778	0.186806	0.277778
Naxi	chr1:212649295-212798601	212741763	rs11119974	0.5	0.45873	0.5	ATF3	ENSG00000162772	Daur	0.444444	0.317938	0.444444
Naxi	chr1:212649295-212798601	212741763	rs11119974	0.5	0.45873	0.5	ATF3	ENSG00000162772	Hezhen	0.388889	0.258454	0.388889
Naxi	chr1:212649295-212798601	212741763	rs11119974	0.5	0.45873	0.5	ATF3	ENSG00000162772	JPT	0.27451	0.225703	0.284314
Naxi	chr1:212649295-212798601	212741763	rs11119974	0.5	0.45873	0.5	ATF3	ENSG00000162772	Japanese	0.339286	0.233705	0.357143
Naxi	chr1:212649295-212798601	212741763	rs11119974	0.5	0.45873	0.5	ATF3	ENSG00000162772	KHV	0.30303	0.284731	0.328283
Naxi	chr1:212649295-212798601	212741763	rs11119974	0.5	0.45873	0.5	ATF3	ENSG00000162772	Karitiana	0.416667	0.328767	0.541667
Naxi	chr1:212649295-212798601	212741763	rs11119974	0.5	0.45873	0.5	ATF3	ENSG00000162772	MXL	0.28125	0.245811	0.28125
Naxi	chr1:212649295-212798601	212741763	rs11119974	0.5	0.45873	0.5	ATF3	ENSG00000162772	Maya	0.547619	0.540241	0.666667
Naxi	chr1:212649295-212798601	212741763	rs11119974	0.5	0.45873	0.5	ATF3	ENSG00000162772	Miao	0.4	0.407627	0.45
Naxi	chr1:212649295-212798601	212741763	rs11119974	0.5	0.45873	0.5	ATF3	ENSG00000162772	Mongola	0.4	0.305556	0.4
Naxi	chr1:212649295-212798601	212741763	rs11119974	0.5	0.45873	0.5	ATF3	ENSG00000162772	PEL	0.417647	0.421541	0.511765
Naxi	chr1:212649295-212798601	212741763	rs11119974	0.5	0.45873	0.5	ATF3	ENSG00000162772	Pima	0.464286	0.349207	0.571429
Naxi	chr1:212649295-212798601	212741763	rs11119974	0.5	0.45873	0.5	ATF3	ENSG00000162772	Surui	0.75	0.75	0.75
Naxi	chr1:212649295-212798601	212741763	rs11119974	0.5	0.45873	0.5	ATF3	ENSG00000162772	Tu	0.3125	0.200868	0.375
Naxi	chr1:212649295-212798601	212741763	rs11119974	0.5	0.45873	0.5	ATF3	ENSG00000162772	Uygur	0.25	0.239943	0.25
Naxi	chr1:212649295-212798601	212741763	rs11119974	0.5	0.45873	0.5	ATF3	ENSG00000162772	Xibo	0.277778	0.0918274	0.333333
Naxi	chr1:212649295-212798601	212741763	rs11119974	0.5	0.45873	0.5	ATF3	ENSG00000162772	Yakut	0.26	0.272857	0.3
Naxi	chr1:212649295-212798601	212742400	rs10863980	0.5	0.45873	0.5	ATF3	ENSG00000162772	CHB	0.427184	0.111005	0.446602
Naxi	chr1:212649295-212798601	212742400	rs10863980	0.5	0.45873	0.5	ATF3	ENSG00000162772	CHS	0.404762	0.36853	0.428571
Naxi	chr1:212649295-212798601	212742400	rs10863980	0.5	0.45873	0.5	ATF3	ENSG00000162772	Cambodian	0.3	0.276562	0.35
Naxi	chr1:212649295-212798601	212742400	rs10863980	0.5	0.45873	0.5	ATF3	ENSG00000162772	Colombian	0.5	0.526157	0.642857
Naxi	chr1:212649295-212798601	212742400	rs10863980	0.5	0.45873	0.5	ATF3	ENSG00000162772	Dai	0.277778	0.186806	0.277778
Naxi	chr1:212649295-212798601	212742400	rs10863980	0.5	0.45873	0.5	ATF3	ENSG00000162772	Daur	0.444444	0.317938	0.444444
Naxi	chr1:212649295-212798601	212742400	rs10863980	0.5	0.45873	0.5	ATF3	ENSG00000162772	Hezhen	0.388889	0.258454	0.388889
Naxi	chr1:212649295-212798601	212742400	rs10863980	0.5	0.45873	0.5	ATF3	ENSG00000162772	JPT	0.27451	0.225703	0.284314
Naxi	chr1:212649295-212798601	212742400	rs10863980	0.5	0.45873	0.5	ATF3	ENSG00000162772	Japanese	0.339286	0.233705	0.357143
Naxi	chr1:212649295-212798601	212742400	rs10863980	0.5	0.45873	0.5	ATF3	ENSG00000162772	KHV	0.30303	0.284731	0.328283
Naxi	chr1:212649295-212798601	212742400	rs10863980	0.5	0.45873	0.5	ATF3	ENSG00000162772	Karitiana	0.416667	0.328767	0.541667
Naxi	chr1:212649295-212798601	212742400	rs10863980	0.5	0.45873	0.5	ATF3	ENSG00000162772	MXL	0.28125	0.245811	0.28125
Naxi	chr1:212649295-212798601	212742400	rs10863980	0.5	0.45873	0.5	ATF3	ENSG00000162772	Maya	0.547619	0.540241	0.666667
Naxi	chr1:212649295-212798601	212742400	rs10863980	0.5	0.45873	0.5	ATF3	ENSG00000162772	Miao	0.4	0.407627	0.45
Naxi	chr1:212649295-212798601	212742400	rs10863980	0.5	0.45873	0.5	ATF3	ENSG00000162772	Mongola	0.4	0.305556	0.4
Naxi	chr1:212649295-212798601	212742400	rs10863980	0.5	0.45873	0.5	ATF3	ENSG00000162772	PEL	0.417647	0.421541	0.511765
Naxi	chr1:212649295-212798601	212742400	rs10863980	0.5	0.45873	0.5	ATF3	ENSG00000162772	Pima	0.464286	0.349207	0.571429
Naxi	chr1:212649295-212798601	212742400	rs10863980	0.5	0.45873	0.5	ATF3	ENSG00000162772	Surui	0.75	0.75	0.75
Naxi	chr1:212649295-212798601	212742400	rs10863980	0.5	0.45873	0.5	ATF3	ENSG00000162772	Tu	0.3125	0.200868	0.375
Naxi	chr1:212649295-212798601	212742400	rs10863980	0.5	0.45873	0.5	ATF3	ENSG00000162772	Uygur	0.25	0.239943	0.25
Naxi	chr1:212649295-212798601	212742400	rs10863980	0.5	0.45873	0.5	ATF3	ENSG00000162772	Xibo	0.277778	0.0918274	0.333333
Naxi	chr1:212649295-212798601	212742400	rs10863980	0.5	0.45873	0.5	ATF3	ENSG00000162772	Yakut	0.26	0.272857	0.3
Naxi	chr1:212649295-212798601	212742675	rs4951613	0.5	0.45873	0.5	ATF3	ENSG00000162772	CHB	0.427184	0.111005	0.446602
Naxi	chr1:212649295-212798601	212742675	rs4951613	0.5	0.45873	0.5	ATF3	ENSG00000162772	CHS	0.404762	0.36853	0.428571
Naxi	chr1:212649295-212798601	212742675	rs4951613	0.5	0.45873	0.5	ATF3	ENSG00000162772	Cambodian	0.3	0.276562	0.35
Naxi	chr1:212649295-212798601	212742675	rs4951613	0.5	0.45873	0.5	ATF3	ENSG00000162772	Colombian	0.5	0.526157	0.642857
Naxi	chr1:212649295-212798601	212742675	rs4951613	0.5	0.45873	0.5	ATF3	ENSG00000162772	Dai	0.277778	0.186806	0.277778
Naxi	chr1:212649295-212798601	212742675	rs4951613	0.5	0.45873	0.5	ATF3	ENSG00000162772	Daur	0.444444	0.317938	0.444444
Naxi	chr1:212649295-212798601	212742675	rs4951613	0.5	0.45873	0.5	ATF3	ENSG00000162772	Hezhen	0.388889	0.258454	0.388889
Naxi	chr1:212649295-212798601	212742675	rs4951613	0.5	0.45873	0.5	ATF3	ENSG00000162772	JPT	0.27451	0.225703	0.284314
Naxi	chr1:212649295-212798601	212742675	rs4951613	0.5	0.45873	0.5	ATF3	ENSG00000162772	Japanese	0.339286	0.233705	0.357143
Naxi	chr1:212649295-212798601	212742675	rs4951613	0.5	0.45873	0.5	ATF3	ENSG00000162772	KHV	0.30303	0.284731	0.328283
Naxi	chr1:212649295-212798601	212742675	rs4951613	0.5	0.45873	0.5	ATF3	ENSG00000162772	Karitiana	0.416667	0.328767	0.541667
Naxi	chr1:212649295-212798601	212742675	rs4951613	0.5	0.45873	0.5	ATF3	ENSG00000162772	MXL	0.28125	0.245811	0.28125
Naxi	chr1:212649295-212798601	212742675	rs4951613	0.5	0.45873	0.5	ATF3	ENSG00000162772	Maya	0.547619	0.540241	0.666667
Naxi	chr1:212649295-212798601	212742675	rs4951613	0.5	0.45873	0.5	ATF3	ENSG00000162772	Miao	0.4	0.407627	0.45
Naxi	chr1:212649295-212798601	212742675	rs4951613	0.5	0.45873	0.5	ATF3	ENSG00000162772	Mongola	0.4	0.305556	0.4
Naxi	chr1:212649295-212798601	212742675	rs4951613	0.5	0.45873	0.5	ATF3	ENSG00000162772	PEL	0.417647	0.421541	0.511765
Naxi	chr1:212649295-212798601	212742675	rs4951613	0.5	0.45873	0.5	ATF3	ENSG00000162772	Pima	0.464286	0.349207	0.571429
Naxi	chr1:212649295-212798601	212742675	rs4951613	0.5	0.45873	0.5	ATF3	ENSG00000162772	Surui	0.75	0.75	0.75
Naxi	chr1:212649295-212798601	212742675	rs4951613	0.5	0.45873	0.5	ATF3	ENSG00000162772	Tu	0.3125	0.200868	0.375
Naxi	chr1:212649295-212798601	212742675	rs4951613	0.5	0.45873	0.5	ATF3	ENSG00000162772	Uygur	0.25	0.239943	0.25
Naxi	chr1:212649295-212798601	212742675	rs4951613	0.5	0.45873	0.5	ATF3	ENSG00000162772	Xibo	0.277778	0.0918274	0.333333
Naxi	chr1:212649295-212798601	212742675	rs4951613	0.5	0.45873	0.5	ATF3	ENSG00000162772	Yakut	0.26	0.272857	0.3
Naxi	chr1:212649295-212798601	212744370	rs12038766	0.5	0.45873	0.5	ATF3	ENSG00000162772	CHB	0.427184	0.111005	0.446602
Naxi	chr1:212649295-212798601	212744370	rs12038766	0.5	0.45873	0.5	ATF3	ENSG00000162772	CHS	0.404762	0.36853	0.428571
Naxi	chr1:212649295-212798601	212744370	rs12038766	0.5	0.45873	0.5	ATF3	ENSG00000162772	Colombian	0.5	0.526157	0.642857
Naxi	chr1:212649295-212798601	212744370	rs12038766	0.5	0.45873	0.5	ATF3	ENSG00000162772	Dai	0.277778	0.186806	0.277778
Naxi	chr1:212649295-212798601	212744370	rs12038766	0.5	0.45873	0.5	ATF3	ENSG00000162772	Daur	0.444444	0.317938	0.444444
Naxi	chr1:212649295-212798601	212744370	rs12038766	0.5	0.45873	0.5	ATF3	ENSG00000162772	Hezhen	0.388889	0.258454	0.388889
Naxi	chr1:212649295-212798601	212744370	rs12038766	0.5	0.45873	0.5	ATF3	ENSG00000162772	JPT	0.27451	0.225703	0.284314
Naxi	chr1:212649295-212798601	212744370	rs12038766	0.5	0.45873	0.5	ATF3	ENSG00000162772	Japanese	0.339286	0.233705	0.357143
Naxi	chr1:212649295-212798601	212744370	rs12038766	0.5	0.45873	0.5	ATF3	ENSG00000162772	KHV	0.30303	0.284731	0.328283
Naxi	chr1:212649295-212798601	212744370	rs12038766	0.5	0.45873	0.5	ATF3	ENSG00000162772	Karitiana	0.416667	0.328767	0.541667
Naxi	chr1:212649295-212798601	212744370	rs12038766	0.5	0.45873	0.5	ATF3	ENSG00000162772	MXL	0.28125	0.245811	0.28125
Naxi	chr1:212649295-212798601	212744370	rs12038766	0.5	0.45873	0.5	ATF3	ENSG00000162772	Miao	0.4	0.407627	0.45
Naxi	chr1:212649295-212798601	212744370	rs12038766	0.5	0.45873	0.5	ATF3	ENSG00000162772	Mongola	0.4	0.305556	0.4
Naxi	chr1:212649295-212798601	212744370	rs12038766	0.5	0.45873	0.5	ATF3	ENSG00000162772	PEL	0.417647	0.421541	0.511765
Naxi	chr1:212649295-212798601	212744370	rs12038766	0.5	0.45873	0.5	ATF3	ENSG00000162772	Pima	0.464286	0.349207	0.571429
Naxi	chr1:212649295-212798601	212744370	rs12038766	0.5	0.45873	0.5	ATF3	ENSG00000162772	Surui	0.75	0.75	0.75
Naxi	chr1:212649295-212798601	212744370	rs12038766	0.5	0.45873	0.5	ATF3	ENSG00000162772	Tu	0.3125	0.200868	0.375
Naxi	chr1:212649295-212798601	212744370	rs12038766	0.5	0.45873	0.5	ATF3	ENSG00000162772	Uygur	0.25	0.239943	0.25
Naxi	chr1:212649295-212798601	212744370	rs12038766	0.5	0.45873	0.5	ATF3	ENSG00000162772	Xibo	0.277778	0.0918274	0.333333
Naxi	chr1:212649295-212798601	212744370	rs12038766	0.5	0.45873	0.5	ATF3	ENSG00000162772	Yakut	0.26	0.272857	0.3
Naxi	chr1:212649295-212798601	212747722	rs11119975	0.5	0.45873	0.5	ATF3	ENSG00000162772	CHB	0.427184	0.111005	0.446602
Naxi	chr1:212649295-212798601	212747722	rs11119975	0.5	0.45873	0.5	ATF3	ENSG00000162772	CHS	0.404762	0.36853	0.428571
Naxi	chr1:212649295-212798601	212747722	rs11119975	0.5	0.45873	0.5	ATF3	ENSG00000162772	Colombian	0.5	0.526157	0.642857
Naxi	chr1:212649295-212798601	212747722	rs11119975	0.5	0.45873	0.5	ATF3	ENSG00000162772	Dai	0.277778	0.186806	0.277778
Naxi	chr1:212649295-212798601	212747722	rs11119975	0.5	0.45873	0.5	ATF3	ENSG00000162772	Daur	0.444444	0.317938	0.444444
Naxi	chr1:212649295-212798601	212747722	rs11119975	0.5	0.45873	0.5	ATF3	ENSG00000162772	Hezhen	0.388889	0.258454	0.388889
Naxi	chr1:212649295-212798601	212747722	rs11119975	0.5	0.45873	0.5	ATF3	ENSG00000162772	JPT	0.27451	0.225703	0.284314
Naxi	chr1:212649295-212798601	212747722	rs11119975	0.5	0.45873	0.5	ATF3	ENSG00000162772	Japanese	0.321429	0.233705	0.357143
Naxi	chr1:212649295-212798601	212747722	rs11119975	0.5	0.45873	0.5	ATF3	ENSG00000162772	KHV	0.30303	0.284731	0.328283
Naxi	chr1:212649295-212798601	212747722	rs11119975	0.5	0.45873	0.5	ATF3	ENSG00000162772	Karitiana	0.416667	0.328767	0.541667
Naxi	chr1:212649295-212798601	212747722	rs11119975	0.5	0.45873	0.5	ATF3	ENSG00000162772	MXL	0.273438	0.245811	0.28125
Naxi	chr1:212649295-212798601	212747722	rs11119975	0.5	0.45873	0.5	ATF3	ENSG00000162772	Maya	0.547619	0.540241	0.666667
Naxi	chr1:212649295-212798601	212747722	rs11119975	0.5	0.45873	0.5	ATF3	ENSG00000162772	Miao	0.4	0.407627	0.45
Naxi	chr1:212649295-212798601	212747722	rs11119975	0.5	0.45873	0.5	ATF3	ENSG00000162772	Mongola	0.4	0.305556	0.4
Naxi	chr1:212649295-212798601	212747722	rs11119975	0.5	0.45873	0.5	ATF3	ENSG00000162772	PEL	0.411765	0.421541	0.511765
Naxi	chr1:212649295-212798601	212747722	rs11119975	0.5	0.45873	0.5	ATF3	ENSG00000162772	Pima	0.464286	0.349207	0.571429
Naxi	chr1:212649295-212798601	212747722	rs11119975	0.5	0.45873	0.5	ATF3	ENSG00000162772	Surui	0.75	0.75	0.75
Naxi	chr1:212649295-212798601	212747722	rs11119975	0.5	0.45873	0.5	ATF3	ENSG00000162772	Tu	0.3125	0.200868	0.375
Naxi	chr1:212649295-212798601	212747722	rs11119975	0.5	0.45873	0.5	ATF3	ENSG00000162772	Xibo	0.277778	0.0918274	0.333333
Naxi	chr1:212649295-212798601	212747722	rs11119975	0.5	0.45873	0.5	ATF3	ENSG00000162772	Yakut	0.26	0.272857	0.3
Naxi	chr1:212649295-212798601	212758392	rs4951618	0.5	0.45873	0.5	ATF3	ENSG00000162772	CHB	0.354369	0.111005	0.446602
Naxi	chr1:212649295-212798601	212758392	rs4951618	0.5	0.45873	0.5	ATF3	ENSG00000162772	CHS	0.380952	0.36853	0.428571
Naxi	chr1:212649295-212798601	212758392	rs4951618	0.5	0.45873	0.5	ATF3	ENSG00000162772	Cambodian	0.3	0.276562	0.35
Naxi	chr1:212649295-212798601	212758392	rs4951618	0.5	0.45873	0.5	ATF3	ENSG00000162772	Colombian	0.5	0.526157	0.642857
Naxi	chr1:212649295-212798601	212758392	rs4951618	0.5	0.45873	0.5	ATF3	ENSG00000162772	Dai	0.277778	0.186806	0.277778
Naxi	chr1:212649295-212798601	212758392	rs4951618	0.5	0.45873	0.5	ATF3	ENSG00000162772	Daur	0.444444	0.317938	0.444444
Naxi	chr1:212649295-212798601	212758392	rs4951618	0.5	0.45873	0.5	ATF3	ENSG00000162772	Hezhen	0.277778	0.258454	0.388889
Naxi	chr1:212649295-212798601	212758392	rs4951618	0.5	0.45873	0.5	ATF3	ENSG00000162772	JPT	0.254902	0.225703	0.284314
Naxi	chr1:212649295-212798601	212758392	rs4951618	0.5	0.45873	0.5	ATF3	ENSG00000162772	Japanese	0.285714	0.233705	0.357143
Naxi	chr1:212649295-212798601	212758392	rs4951618	0.5	0.45873	0.5	ATF3	ENSG00000162772	KHV	0.287879	0.284731	0.328283
Naxi	chr1:212649295-212798601	212758392	rs4951618	0.5	0.45873	0.5	ATF3	ENSG00000162772	Karitiana	0.541667	0.328767	0.541667
Naxi	chr1:212649295-212798601	212758392	rs4951618	0.5	0.45873	0.5	ATF3	ENSG00000162772	MXL	0.273438	0.245811	0.28125
Naxi	chr1:212649295-212798601	212758392	rs4951618	0.5	0.45873	0.5	ATF3	ENSG00000162772	Maya	0.571429	0.540241	0.666667
Naxi	chr1:212649295-212798601	212758392	rs4951618	0.5	0.45873	0.5	ATF3	ENSG00000162772	Miao	0.35	0.407627	0.45
Naxi	chr1:212649295-212798601	212758392	rs4951618	0.5	0.45873	0.5	ATF3	ENSG00000162772	Mongola	0.35	0.305556	0.4
Naxi	chr1:212649295-212798601	212758392	rs4951618	0.5	0.45873	0.5	ATF3	ENSG00000162772	PEL	0.405882	0.421541	0.511765
Naxi	chr1:212649295-212798601	212758392	rs4951618	0.5	0.45873	0.5	ATF3	ENSG00000162772	PUR	0.225962	0.169384	0.225962
Naxi	chr1:212649295-212798601	212758392	rs4951618	0.5	0.45873	0.5	ATF3	ENSG00000162772	Pima	0.571429	0.349207	0.571429
Naxi	chr1:212649295-212798601	212758392	rs4951618	0.5	0.45873	0.5	ATF3	ENSG00000162772	Surui	0.75	0.75	0.75
Naxi	chr1:212649295-212798601	212758392	rs4951618	0.5	0.45873	0.5	ATF3	ENSG00000162772	Tu	0.3125	0.200868	0.375
Naxi	chr1:212649295-212798601	212758392	rs4951618	0.5	0.45873	0.5	ATF3	ENSG00000162772	Xibo	0.222222	0.0918274	0.333333
Naxi	chr1:212649295-212798601	212758392	rs4951618	0.5	0.45873	0.5	ATF3	ENSG00000162772	Yakut	0.26	0.272857	0.3
Naxi	chr1:212649295-212798601	212758604	rs1105899	0.5	0.45873	0.5	ATF3	ENSG00000162772	CHB	0.354369	0.111005	0.446602
Naxi	chr1:212649295-212798601	212758604	rs1105899	0.5	0.45873	0.5	ATF3	ENSG00000162772	CHS	0.395238	0.36853	0.428571
Naxi	chr1:212649295-212798601	212758604	rs1105899	0.5	0.45873	0.5	ATF3	ENSG00000162772	Colombian	0.5	0.526157	0.642857
Naxi	chr1:212649295-212798601	212758604	rs1105899	0.5	0.45873	0.5	ATF3	ENSG00000162772	Dai	0.277778	0.186806	0.277778
Naxi	chr1:212649295-212798601	212758604	rs1105899	0.5	0.45873	0.5	ATF3	ENSG00000162772	Daur	0.388889	0.317938	0.444444
Naxi	chr1:212649295-212798601	212758604	rs1105899	0.5	0.45873	0.5	ATF3	ENSG00000162772	JPT	0.264706	0.225703	0.284314
Naxi	chr1:212649295-212798601	212758604	rs1105899	0.5	0.45873	0.5	ATF3	ENSG00000162772	Japanese	0.339286	0.233705	0.357143
Naxi	chr1:212649295-212798601	212758604	rs1105899	0.5	0.45873	0.5	ATF3	ENSG00000162772	KHV	0.277778	0.284731	0.328283
Naxi	chr1:212649295-212798601	212758604	rs1105899	0.5	0.45873	0.5	ATF3	ENSG00000162772	Karitiana	0.541667	0.328767	0.541667
Naxi	chr1:212649295-212798601	212758604	rs1105899	0.5	0.45873	0.5	ATF3	ENSG00000162772	Maya	0.571429	0.540241	0.666667
Naxi	chr1:212649295-212798601	212758604	rs1105899	0.5	0.45873	0.5	ATF3	ENSG00000162772	Miao	0.35	0.407627	0.45
Naxi	chr1:212649295-212798601	212758604	rs1105899	0.5	0.45873	0.5	ATF3	ENSG00000162772	Mongola	0.35	0.305556	0.4
Naxi	chr1:212649295-212798601	212758604	rs1105899	0.5	0.45873	0.5	ATF3	ENSG00000162772	PEL	0.394118	0.421541	0.511765
Naxi	chr1:212649295-212798601	212758604	rs1105899	0.5	0.45873	0.5	ATF3	ENSG00000162772	Pima	0.5	0.349207	0.571429
Naxi	chr1:212649295-212798601	212758604	rs1105899	0.5	0.45873	0.5	ATF3	ENSG00000162772	Surui	0.75	0.75	0.75
Naxi	chr1:212649295-212798601	212758604	rs1105899	0.5	0.45873	0.5	ATF3	ENSG00000162772	Tu	0.25	0.200868	0.375
Naxi	chr1:212649295-212798601	212758604	rs1105899	0.5	0.45873	0.5	ATF3	ENSG00000162772	Xibo	0.222222	0.0918274	0.333333
Naxi	chr1:212649295-212798601	212758604	rs1105899	0.5	0.45873	0.5	ATF3	ENSG00000162772	Yakut	0.26	0.272857	0.3
Naxi	chr1:212649295-212798601	212759493	rs6674072	0.5	0.45873	0.5	ATF3	ENSG00000162772	CHB	0.334951	0.111005	0.446602
Naxi	chr1:212649295-212798601	212759493	rs6674072	0.5	0.45873	0.5	ATF3	ENSG00000162772	CHS	0.371429	0.36853	0.428571
Naxi	chr1:212649295-212798601	212759493	rs6674072	0.5	0.45873	0.5	ATF3	ENSG00000162772	Cambodian	0.25	0.276562	0.35
Naxi	chr1:212649295-212798601	212759493	rs6674072	0.5	0.45873	0.5	ATF3	ENSG00000162772	Colombian	0.5	0.526157	0.642857
Naxi	chr1:212649295-212798601	212759493	rs6674072	0.5	0.45873	0.5	ATF3	ENSG00000162772	Dai	0.277778	0.186806	0.277778
Naxi	chr1:212649295-212798601	212759493	rs6674072	0.5	0.45873	0.5	ATF3	ENSG00000162772	Daur	0.444444	0.317938	0.444444
Naxi	chr1:212649295-212798601	212759493	rs6674072	0.5	0.45873	0.5	ATF3	ENSG00000162772	Hezhen	0.277778	0.258454	0.388889
Naxi	chr1:212649295-212798601	212759493	rs6674072	0.5	0.45873	0.5	ATF3	ENSG00000162772	JPT	0.254902	0.225703	0.284314
Naxi	chr1:212649295-212798601	212759493	rs6674072	0.5	0.45873	0.5	ATF3	ENSG00000162772	Japanese	0.303571	0.233705	0.357143
Naxi	chr1:212649295-212798601	212759493	rs6674072	0.5	0.45873	0.5	ATF3	ENSG00000162772	KHV	0.277778	0.284731	0.328283
Naxi	chr1:212649295-212798601	212759493	rs6674072	0.5	0.45873	0.5	ATF3	ENSG00000162772	Karitiana	0.541667	0.328767	0.541667
Naxi	chr1:212649295-212798601	212759493	rs6674072	0.5	0.45873	0.5	ATF3	ENSG00000162772	MXL	0.273438	0.245811	0.28125
Naxi	chr1:212649295-212798601	212759493	rs6674072	0.5	0.45873	0.5	ATF3	ENSG00000162772	Maya	0.571429	0.540241	0.666667
Naxi	chr1:212649295-212798601	212759493	rs6674072	0.5	0.45873	0.5	ATF3	ENSG00000162772	Miao	0.35	0.407627	0.45
Naxi	chr1:212649295-212798601	212759493	rs6674072	0.5	0.45873	0.5	ATF3	ENSG00000162772	Mongola	0.35	0.305556	0.4
Naxi	chr1:212649295-212798601	212759493	rs6674072	0.5	0.45873	0.5	ATF3	ENSG00000162772	PEL	0.405882	0.421541	0.511765
Naxi	chr1:212649295-212798601	212759493	rs6674072	0.5	0.45873	0.5	ATF3	ENSG00000162772	Pima	0.464286	0.349207	0.571429
Naxi	chr1:212649295-212798601	212759493	rs6674072	0.5	0.45873	0.5	ATF3	ENSG00000162772	Surui	0.75	0.75	0.75
Naxi	chr1:212649295-212798601	212759493	rs6674072	0.5	0.45873	0.5	ATF3	ENSG00000162772	Tu	0.25	0.200868	0.375
Naxi	chr1:212649295-212798601	212759493	rs6674072	0.5	0.45873	0.5	ATF3	ENSG00000162772	Xibo	0.277778	0.0918274	0.333333
Naxi	chr1:212649295-212798601	212759493	rs6674072	0.5	0.45873	0.5	ATF3	ENSG00000162772	Yakut	0.28	0.272857	0.3
CHS	chr1:212649295-212798601	212738835	rs3806460	0.404762	0.36853	0.428571	ENSG00000288007	ENSG00000288007	CHB	0.427184	0.111005	0.446602
CHS	chr1:212649295-212798601	212738835	rs3806460	0.404762	0.36853	0.428571	ENSG00000288007	ENSG00000288007	Cambodian	0.3	0.276562	0.35
CHS	chr1:212649295-212798601	212738835	rs3806460	0.404762	0.36853	0.428571	ENSG00000288007	ENSG00000288007	Colombian	0.5	0.526157	0.642857
CHS	chr1:212649295-212798601	212738835	rs3806460	0.404762	0.36853	0.428571	ENSG00000288007	ENSG00000288007	Dai	0.277778	0.186806	0.277778
CHS	chr1:212649295-212798601	212738835	rs3806460	0.404762	0.36853	0.428571	ENSG00000288007	ENSG00000288007	Daur	0.444444	0.317938	0.444444
CHS	chr1:212649295-212798601	212738835	rs3806460	0.404762	0.36853	0.428571	ENSG00000288007	ENSG00000288007	Hezhen	0.388889	0.258454	0.388889
CHS	chr1:212649295-212798601	212738835	rs3806460	0.404762	0.36853	0.428571	ENSG00000288007	ENSG00000288007	JPT	0.27451	0.225703	0.284314
CHS	chr1:212649295-212798601	212738835	rs3806460	0.404762	0.36853	0.428571	ENSG00000288007	ENSG00000288007	Japanese	0.339286	0.233705	0.357143
CHS	chr1:212649295-212798601	212738835	rs3806460	0.404762	0.36853	0.428571	ENSG00000288007	ENSG00000288007	KHV	0.30303	0.284731	0.328283
CHS	chr1:212649295-212798601	212738835	rs3806460	0.404762	0.36853	0.428571	ENSG00000288007	ENSG00000288007	Karitiana	0.416667	0.328767	0.541667
CHS	chr1:212649295-212798601	212738835	rs3806460	0.404762	0.36853	0.428571	ENSG00000288007	ENSG00000288007	MXL	0.28125	0.245811	0.28125
CHS	chr1:212649295-212798601	212738835	rs3806460	0.404762	0.36853	0.428571	ENSG00000288007	ENSG00000288007	Maya	0.547619	0.540241	0.666667
CHS	chr1:212649295-212798601	212738835	rs3806460	0.404762	0.36853	0.428571	ENSG00000288007	ENSG00000288007	Miao	0.4	0.407627	0.45
CHS	chr1:212649295-212798601	212738835	rs3806460	0.404762	0.36853	0.428571	ENSG00000288007	ENSG00000288007	Mongola	0.4	0.305556	0.4
CHS	chr1:212649295-212798601	212738835	rs3806460	0.404762	0.36853	0.428571	ENSG00000288007	ENSG00000288007	Naxi	0.5	0.45873	0.5
CHS	chr1:212649295-212798601	212738835	rs3806460	0.404762	0.36853	0.428571	ENSG00000288007	ENSG00000288007	PEL	0.417647	0.421541	0.511765
CHS	chr1:212649295-212798601	212738835	rs3806460	0.404762	0.36853	0.428571	ENSG00000288007	ENSG00000288007	Pima	0.464286	0.349207	0.571429
CHS	chr1:212649295-212798601	212738835	rs3806460	0.404762	0.36853	0.428571	ENSG00000288007	ENSG00000288007	Surui	0.75	0.75	0.75
CHS	chr1:212649295-212798601	212738835	rs3806460	0.404762	0.36853	0.428571	ENSG00000288007	ENSG00000288007	Tu	0.3125	0.200868	0.375
CHS	chr1:212649295-212798601	212738835	rs3806460	0.404762	0.36853	0.428571	ENSG00000288007	ENSG00000288007	Uygur	0.25	0.239943	0.25
CHS	chr1:212649295-212798601	212738835	rs3806460	0.404762	0.36853	0.428571	ENSG00000288007	ENSG00000288007	Xibo	0.277778	0.0918274	0.333333
CHS	chr1:212649295-212798601	212738835	rs3806460	0.404762	0.36853	0.428571	ENSG00000288007	ENSG00000288007	Yakut	0.26	0.272857	0.3
CHS	chr1:212649295-212798601	212741763	rs11119974	0.404762	0.36853	0.428571	ATF3	ENSG00000162772	CHB	0.427184	0.111005	0.446602
CHS	chr1:212649295-212798601	212741763	rs11119974	0.404762	0.36853	0.428571	ATF3	ENSG00000162772	Cambodian	0.3	0.276562	0.35
CHS	chr1:212649295-212798601	212741763	rs11119974	0.404762	0.36853	0.428571	ATF3	ENSG00000162772	Colombian	0.5	0.526157	0.642857
CHS	chr1:212649295-212798601	212741763	rs11119974	0.404762	0.36853	0.428571	ATF3	ENSG00000162772	Dai	0.277778	0.186806	0.277778
CHS	chr1:212649295-212798601	212741763	rs11119974	0.404762	0.36853	0.428571	ATF3	ENSG00000162772	Daur	0.444444	0.317938	0.444444
CHS	chr1:212649295-212798601	212741763	rs11119974	0.404762	0.36853	0.428571	ATF3	ENSG00000162772	Hezhen	0.388889	0.258454	0.388889
CHS	chr1:212649295-212798601	212741763	rs11119974	0.404762	0.36853	0.428571	ATF3	ENSG00000162772	JPT	0.27451	0.225703	0.284314
CHS	chr1:212649295-212798601	212741763	rs11119974	0.404762	0.36853	0.428571	ATF3	ENSG00000162772	Japanese	0.339286	0.233705	0.357143
CHS	chr1:212649295-212798601	212741763	rs11119974	0.404762	0.36853	0.428571	ATF3	ENSG00000162772	KHV	0.30303	0.284731	0.328283
CHS	chr1:212649295-212798601	212741763	rs11119974	0.404762	0.36853	0.428571	ATF3	ENSG00000162772	Karitiana	0.416667	0.328767	0.541667
CHS	chr1:212649295-212798601	212741763	rs11119974	0.404762	0.36853	0.428571	ATF3	ENSG00000162772	MXL	0.28125	0.245811	0.28125
CHS	chr1:212649295-212798601	212741763	rs11119974	0.404762	0.36853	0.428571	ATF3	ENSG00000162772	Maya	0.547619	0.540241	0.666667
CHS	chr1:212649295-212798601	212741763	rs11119974	0.404762	0.36853	0.428571	ATF3	ENSG00000162772	Miao	0.4	0.407627	0.45
CHS	chr1:212649295-212798601	212741763	rs11119974	0.404762	0.36853	0.428571	ATF3	ENSG00000162772	Mongola	0.4	0.305556	0.4
CHS	chr1:212649295-212798601	212741763	rs11119974	0.404762	0.36853	0.428571	ATF3	ENSG00000162772	Naxi	0.5	0.45873	0.5
CHS	chr1:212649295-212798601	212741763	rs11119974	0.404762	0.36853	0.428571	ATF3	ENSG00000162772	PEL	0.417647	0.421541	0.511765
CHS	chr1:212649295-212798601	212741763	rs11119974	0.404762	0.36853	0.428571	ATF3	ENSG00000162772	Pima	0.464286	0.349207	0.571429
CHS	chr1:212649295-212798601	212741763	rs11119974	0.404762	0.36853	0.428571	ATF3	ENSG00000162772	Surui	0.75	0.75	0.75
CHS	chr1:212649295-212798601	212741763	rs11119974	0.404762	0.36853	0.428571	ATF3	ENSG00000162772	Tu	0.3125	0.200868	0.375
CHS	chr1:212649295-212798601	212741763	rs11119974	0.404762	0.36853	0.428571	ATF3	ENSG00000162772	Uygur	0.25	0.239943	0.25
CHS	chr1:212649295-212798601	212741763	rs11119974	0.404762	0.36853	0.428571	ATF3	ENSG00000162772	Xibo	0.277778	0.0918274	0.333333
CHS	chr1:212649295-212798601	212741763	rs11119974	0.404762	0.36853	0.428571	ATF3	ENSG00000162772	Yakut	0.26	0.272857	0.3
CHS	chr1:212649295-212798601	212742400	rs10863980	0.404762	0.36853	0.428571	ATF3	ENSG00000162772	CHB	0.427184	0.111005	0.446602
CHS	chr1:212649295-212798601	212742400	rs10863980	0.404762	0.36853	0.428571	ATF3	ENSG00000162772	Cambodian	0.3	0.276562	0.35
CHS	chr1:212649295-212798601	212742400	rs10863980	0.404762	0.36853	0.428571	ATF3	ENSG00000162772	Colombian	0.5	0.526157	0.642857
CHS	chr1:212649295-212798601	212742400	rs10863980	0.404762	0.36853	0.428571	ATF3	ENSG00000162772	Dai	0.277778	0.186806	0.277778
CHS	chr1:212649295-212798601	212742400	rs10863980	0.404762	0.36853	0.428571	ATF3	ENSG00000162772	Daur	0.444444	0.317938	0.444444
CHS	chr1:212649295-212798601	212742400	rs10863980	0.404762	0.36853	0.428571	ATF3	ENSG00000162772	Hezhen	0.388889	0.258454	0.388889
CHS	chr1:212649295-212798601	212742400	rs10863980	0.404762	0.36853	0.428571	ATF3	ENSG00000162772	JPT	0.27451	0.225703	0.284314
CHS	chr1:212649295-212798601	212742400	rs10863980	0.404762	0.36853	0.428571	ATF3	ENSG00000162772	Japanese	0.339286	0.233705	0.357143
CHS	chr1:212649295-212798601	212742400	rs10863980	0.404762	0.36853	0.428571	ATF3	ENSG00000162772	KHV	0.30303	0.284731	0.328283
CHS	chr1:212649295-212798601	212742400	rs10863980	0.404762	0.36853	0.428571	ATF3	ENSG00000162772	Karitiana	0.416667	0.328767	0.541667
CHS	chr1:212649295-212798601	212742400	rs10863980	0.404762	0.36853	0.428571	ATF3	ENSG00000162772	MXL	0.28125	0.245811	0.28125
CHS	chr1:212649295-212798601	212742400	rs10863980	0.404762	0.36853	0.428571	ATF3	ENSG00000162772	Maya	0.547619	0.540241	0.666667
CHS	chr1:212649295-212798601	212742400	rs10863980	0.404762	0.36853	0.428571	ATF3	ENSG00000162772	Miao	0.4	0.407627	0.45
CHS	chr1:212649295-212798601	212742400	rs10863980	0.404762	0.36853	0.428571	ATF3	ENSG00000162772	Mongola	0.4	0.305556	0.4
CHS	chr1:212649295-212798601	212742400	rs10863980	0.404762	0.36853	0.428571	ATF3	ENSG00000162772	Naxi	0.5	0.45873	0.5
CHS	chr1:212649295-212798601	212742400	rs10863980	0.404762	0.36853	0.428571	ATF3	ENSG00000162772	PEL	0.417647	0.421541	0.511765
CHS	chr1:212649295-212798601	212742400	rs10863980	0.404762	0.36853	0.428571	ATF3	ENSG00000162772	Pima	0.464286	0.349207	0.571429
CHS	chr1:212649295-212798601	212742400	rs10863980	0.404762	0.36853	0.428571	ATF3	ENSG00000162772	Surui	0.75	0.75	0.75
CHS	chr1:212649295-212798601	212742400	rs10863980	0.404762	0.36853	0.428571	ATF3	ENSG00000162772	Tu	0.3125	0.200868	0.375
CHS	chr1:212649295-212798601	212742400	rs10863980	0.404762	0.36853	0.428571	ATF3	ENSG00000162772	Uygur	0.25	0.239943	0.25
CHS	chr1:212649295-212798601	212742400	rs10863980	0.404762	0.36853	0.428571	ATF3	ENSG00000162772	Xibo	0.277778	0.0918274	0.333333
CHS	chr1:212649295-212798601	212742400	rs10863980	0.404762	0.36853	0.428571	ATF3	ENSG00000162772	Yakut	0.26	0.272857	0.3
CHS	chr1:212649295-212798601	212742675	rs4951613	0.404762	0.36853	0.428571	ATF3	ENSG00000162772	CHB	0.427184	0.111005	0.446602
CHS	chr1:212649295-212798601	212742675	rs4951613	0.404762	0.36853	0.428571	ATF3	ENSG00000162772	Cambodian	0.3	0.276562	0.35
CHS	chr1:212649295-212798601	212742675	rs4951613	0.404762	0.36853	0.428571	ATF3	ENSG00000162772	Colombian	0.5	0.526157	0.642857
CHS	chr1:212649295-212798601	212742675	rs4951613	0.404762	0.36853	0.428571	ATF3	ENSG00000162772	Dai	0.277778	0.186806	0.277778
CHS	chr1:212649295-212798601	212742675	rs4951613	0.404762	0.36853	0.428571	ATF3	ENSG00000162772	Daur	0.444444	0.317938	0.444444
CHS	chr1:212649295-212798601	212742675	rs4951613	0.404762	0.36853	0.428571	ATF3	ENSG00000162772	Hezhen	0.388889	0.258454	0.388889
CHS	chr1:212649295-212798601	212742675	rs4951613	0.404762	0.36853	0.428571	ATF3	ENSG00000162772	JPT	0.27451	0.225703	0.284314
CHS	chr1:212649295-212798601	212742675	rs4951613	0.404762	0.36853	0.428571	ATF3	ENSG00000162772	Japanese	0.339286	0.233705	0.357143
CHS	chr1:212649295-212798601	212742675	rs4951613	0.404762	0.36853	0.428571	ATF3	ENSG00000162772	KHV	0.30303	0.284731	0.328283
CHS	chr1:212649295-212798601	212742675	rs4951613	0.404762	0.36853	0.428571	ATF3	ENSG00000162772	Karitiana	0.416667	0.328767	0.541667
CHS	chr1:212649295-212798601	212742675	rs4951613	0.404762	0.36853	0.428571	ATF3	ENSG00000162772	MXL	0.28125	0.245811	0.28125
CHS	chr1:212649295-212798601	212742675	rs4951613	0.404762	0.36853	0.428571	ATF3	ENSG00000162772	Maya	0.547619	0.540241	0.666667
CHS	chr1:212649295-212798601	212742675	rs4951613	0.404762	0.36853	0.428571	ATF3	ENSG00000162772	Miao	0.4	0.407627	0.45
CHS	chr1:212649295-212798601	212742675	rs4951613	0.404762	0.36853	0.428571	ATF3	ENSG00000162772	Mongola	0.4	0.305556	0.4
CHS	chr1:212649295-212798601	212742675	rs4951613	0.404762	0.36853	0.428571	ATF3	ENSG00000162772	Naxi	0.5	0.45873	0.5
CHS	chr1:212649295-212798601	212742675	rs4951613	0.404762	0.36853	0.428571	ATF3	ENSG00000162772	PEL	0.417647	0.421541	0.511765
CHS	chr1:212649295-212798601	212742675	rs4951613	0.404762	0.36853	0.428571	ATF3	ENSG00000162772	Pima	0.464286	0.349207	0.571429
CHS	chr1:212649295-212798601	212742675	rs4951613	0.404762	0.36853	0.428571	ATF3	ENSG00000162772	Surui	0.75	0.75	0.75
CHS	chr1:212649295-212798601	212742675	rs4951613	0.404762	0.36853	0.428571	ATF3	ENSG00000162772	Tu	0.3125	0.200868	0.375
CHS	chr1:212649295-212798601	212742675	rs4951613	0.404762	0.36853	0.428571	ATF3	ENSG00000162772	Uygur	0.25	0.239943	0.25
CHS	chr1:212649295-212798601	212742675	rs4951613	0.404762	0.36853	0.428571	ATF3	ENSG00000162772	Xibo	0.277778	0.0918274	0.333333
CHS	chr1:212649295-212798601	212742675	rs4951613	0.404762	0.36853	0.428571	ATF3	ENSG00000162772	Yakut	0.26	0.272857	0.3
CHS	chr1:212649295-212798601	212744370	rs12038766	0.404762	0.36853	0.428571	ATF3	ENSG00000162772	CHB	0.427184	0.111005	0.446602
CHS	chr1:212649295-212798601	212744370	rs12038766	0.404762	0.36853	0.428571	ATF3	ENSG00000162772	Colombian	0.5	0.526157	0.642857
CHS	chr1:212649295-212798601	212744370	rs12038766	0.404762	0.36853	0.428571	ATF3	ENSG00000162772	Dai	0.277778	0.186806	0.277778
CHS	chr1:212649295-212798601	212744370	rs12038766	0.404762	0.36853	0.428571	ATF3	ENSG00000162772	Daur	0.444444	0.317938	0.444444
CHS	chr1:212649295-212798601	212744370	rs12038766	0.404762	0.36853	0.428571	ATF3	ENSG00000162772	Hezhen	0.388889	0.258454	0.388889
CHS	chr1:212649295-212798601	212744370	rs12038766	0.404762	0.36853	0.428571	ATF3	ENSG00000162772	JPT	0.27451	0.225703	0.284314
CHS	chr1:212649295-212798601	212744370	rs12038766	0.404762	0.36853	0.428571	ATF3	ENSG00000162772	Japanese	0.339286	0.233705	0.357143
CHS	chr1:212649295-212798601	212744370	rs12038766	0.404762	0.36853	0.428571	ATF3	ENSG00000162772	KHV	0.30303	0.284731	0.328283
CHS	chr1:212649295-212798601	212744370	rs12038766	0.404762	0.36853	0.428571	ATF3	ENSG00000162772	Karitiana	0.416667	0.328767	0.541667
CHS	chr1:212649295-212798601	212744370	rs12038766	0.404762	0.36853	0.428571	ATF3	ENSG00000162772	MXL	0.28125	0.245811	0.28125
CHS	chr1:212649295-212798601	212744370	rs12038766	0.404762	0.36853	0.428571	ATF3	ENSG00000162772	Miao	0.4	0.407627	0.45
CHS	chr1:212649295-212798601	212744370	rs12038766	0.404762	0.36853	0.428571	ATF3	ENSG00000162772	Mongola	0.4	0.305556	0.4
CHS	chr1:212649295-212798601	212744370	rs12038766	0.404762	0.36853	0.428571	ATF3	ENSG00000162772	Naxi	0.5	0.45873	0.5
CHS	chr1:212649295-212798601	212744370	rs12038766	0.404762	0.36853	0.428571	ATF3	ENSG00000162772	PEL	0.417647	0.421541	0.511765
CHS	chr1:212649295-212798601	212744370	rs12038766	0.404762	0.36853	0.428571	ATF3	ENSG00000162772	Pima	0.464286	0.349207	0.571429
CHS	chr1:212649295-212798601	212744370	rs12038766	0.404762	0.36853	0.428571	ATF3	ENSG00000162772	Surui	0.75	0.75	0.75
CHS	chr1:212649295-212798601	212744370	rs12038766	0.404762	0.36853	0.428571	ATF3	ENSG00000162772	Tu	0.3125	0.200868	0.375
CHS	chr1:212649295-212798601	212744370	rs12038766	0.404762	0.36853	0.428571	ATF3	ENSG00000162772	Uygur	0.25	0.239943	0.25
CHS	chr1:212649295-212798601	212744370	rs12038766	0.404762	0.36853	0.428571	ATF3	ENSG00000162772	Xibo	0.277778	0.0918274	0.333333
CHS	chr1:212649295-212798601	212744370	rs12038766	0.404762	0.36853	0.428571	ATF3	ENSG00000162772	Yakut	0.26	0.272857	0.3
CHS	chr1:212649295-212798601	212747722	rs11119975	0.404762	0.36853	0.428571	ATF3	ENSG00000162772	CHB	0.427184	0.111005	0.446602
CHS	chr1:212649295-212798601	212747722	rs11119975	0.404762	0.36853	0.428571	ATF3	ENSG00000162772	Colombian	0.5	0.526157	0.642857
CHS	chr1:212649295-212798601	212747722	rs11119975	0.404762	0.36853	0.428571	ATF3	ENSG00000162772	Dai	0.277778	0.186806	0.277778
CHS	chr1:212649295-212798601	212747722	rs11119975	0.404762	0.36853	0.428571	ATF3	ENSG00000162772	Daur	0.444444	0.317938	0.444444
CHS	chr1:212649295-212798601	212747722	rs11119975	0.404762	0.36853	0.428571	ATF3	ENSG00000162772	Hezhen	0.388889	0.258454	0.388889
CHS	chr1:212649295-212798601	212747722	rs11119975	0.404762	0.36853	0.428571	ATF3	ENSG00000162772	JPT	0.27451	0.225703	0.284314
CHS	chr1:212649295-212798601	212747722	rs11119975	0.404762	0.36853	0.428571	ATF3	ENSG00000162772	Japanese	0.321429	0.233705	0.357143
CHS	chr1:212649295-212798601	212747722	rs11119975	0.404762	0.36853	0.428571	ATF3	ENSG00000162772	KHV	0.30303	0.284731	0.328283
CHS	chr1:212649295-212798601	212747722	rs11119975	0.404762	0.36853	0.428571	ATF3	ENSG00000162772	Karitiana	0.416667	0.328767	0.541667
CHS	chr1:212649295-212798601	212747722	rs11119975	0.404762	0.36853	0.428571	ATF3	ENSG00000162772	MXL	0.273438	0.245811	0.28125
CHS	chr1:212649295-212798601	212747722	rs11119975	0.404762	0.36853	0.428571	ATF3	ENSG00000162772	Maya	0.547619	0.540241	0.666667
CHS	chr1:212649295-212798601	212747722	rs11119975	0.404762	0.36853	0.428571	ATF3	ENSG00000162772	Miao	0.4	0.407627	0.45
CHS	chr1:212649295-212798601	212747722	rs11119975	0.404762	0.36853	0.428571	ATF3	ENSG00000162772	Mongola	0.4	0.305556	0.4
CHS	chr1:212649295-212798601	212747722	rs11119975	0.404762	0.36853	0.428571	ATF3	ENSG00000162772	Naxi	0.5	0.45873	0.5
CHS	chr1:212649295-212798601	212747722	rs11119975	0.404762	0.36853	0.428571	ATF3	ENSG00000162772	PEL	0.411765	0.421541	0.511765
CHS	chr1:212649295-212798601	212747722	rs11119975	0.404762	0.36853	0.428571	ATF3	ENSG00000162772	Pima	0.464286	0.349207	0.571429
CHS	chr1:212649295-212798601	212747722	rs11119975	0.404762	0.36853	0.428571	ATF3	ENSG00000162772	Surui	0.75	0.75	0.75
CHS	chr1:212649295-212798601	212747722	rs11119975	0.404762	0.36853	0.428571	ATF3	ENSG00000162772	Tu	0.3125	0.200868	0.375
CHS	chr1:212649295-212798601	212747722	rs11119975	0.404762	0.36853	0.428571	ATF3	ENSG00000162772	Xibo	0.277778	0.0918274	0.333333
CHS	chr1:212649295-212798601	212747722	rs11119975	0.404762	0.36853	0.428571	ATF3	ENSG00000162772	Yakut	0.26	0.272857	0.3
Surui	chr1:212649295-212811057	212738835	rs3806460	0.75	0.75	0.75	ENSG00000288007	ENSG00000288007	CHB	0.427184	0.111005	0.446602
Surui	chr1:212649295-212811057	212738835	rs3806460	0.75	0.75	0.75	ENSG00000288007	ENSG00000288007	CHS	0.404762	0.36853	0.428571
Surui	chr1:212649295-212811057	212738835	rs3806460	0.75	0.75	0.75	ENSG00000288007	ENSG00000288007	Cambodian	0.3	0.276562	0.35
Surui	chr1:212649295-212811057	212738835	rs3806460	0.75	0.75	0.75	ENSG00000288007	ENSG00000288007	Colombian	0.5	0.526157	0.642857
Surui	chr1:212649295-212811057	212738835	rs3806460	0.75	0.75	0.75	ENSG00000288007	ENSG00000288007	Dai	0.277778	0.186806	0.277778
Surui	chr1:212649295-212811057	212738835	rs3806460	0.75	0.75	0.75	ENSG00000288007	ENSG00000288007	Daur	0.444444	0.317938	0.444444
Surui	chr1:212649295-212811057	212738835	rs3806460	0.75	0.75	0.75	ENSG00000288007	ENSG00000288007	Hezhen	0.388889	0.258454	0.388889
Surui	chr1:212649295-212811057	212738835	rs3806460	0.75	0.75	0.75	ENSG00000288007	ENSG00000288007	JPT	0.27451	0.225703	0.284314
Surui	chr1:212649295-212811057	212738835	rs3806460	0.75	0.75	0.75	ENSG00000288007	ENSG00000288007	Japanese	0.339286	0.233705	0.357143
Surui	chr1:212649295-212811057	212738835	rs3806460	0.75	0.75	0.75	ENSG00000288007	ENSG00000288007	KHV	0.30303	0.284731	0.328283
Surui	chr1:212649295-212811057	212738835	rs3806460	0.75	0.75	0.75	ENSG00000288007	ENSG00000288007	Karitiana	0.416667	0.328767	0.541667
Surui	chr1:212649295-212811057	212738835	rs3806460	0.75	0.75	0.75	ENSG00000288007	ENSG00000288007	MXL	0.28125	0.245811	0.28125
Surui	chr1:212649295-212811057	212738835	rs3806460	0.75	0.75	0.75	ENSG00000288007	ENSG00000288007	Maya	0.547619	0.540241	0.666667
Surui	chr1:212649295-212811057	212738835	rs3806460	0.75	0.75	0.75	ENSG00000288007	ENSG00000288007	Miao	0.4	0.407627	0.45
Surui	chr1:212649295-212811057	212738835	rs3806460	0.75	0.75	0.75	ENSG00000288007	ENSG00000288007	Mongola	0.4	0.305556	0.4
Surui	chr1:212649295-212811057	212738835	rs3806460	0.75	0.75	0.75	ENSG00000288007	ENSG00000288007	Naxi	0.5	0.45873	0.5
Surui	chr1:212649295-212811057	212738835	rs3806460	0.75	0.75	0.75	ENSG00000288007	ENSG00000288007	PEL	0.417647	0.421541	0.511765
Surui	chr1:212649295-212811057	212738835	rs3806460	0.75	0.75	0.75	ENSG00000288007	ENSG00000288007	Pima	0.464286	0.349207	0.571429
Surui	chr1:212649295-212811057	212738835	rs3806460	0.75	0.75	0.75	ENSG00000288007	ENSG00000288007	Tu	0.3125	0.200868	0.375
Surui	chr1:212649295-212811057	212738835	rs3806460	0.75	0.75	0.75	ENSG00000288007	ENSG00000288007	Uygur	0.25	0.239943	0.25
Surui	chr1:212649295-212811057	212738835	rs3806460	0.75	0.75	0.75	ENSG00000288007	ENSG00000288007	Xibo	0.277778	0.0918274	0.333333
Surui	chr1:212649295-212811057	212738835	rs3806460	0.75	0.75	0.75	ENSG00000288007	ENSG00000288007	Yakut	0.26	0.272857	0.3
Surui	chr1:212649295-212811057	212741763	rs11119974	0.75	0.75	0.75	ATF3	ENSG00000162772	CHB	0.427184	0.111005	0.446602
Surui	chr1:212649295-212811057	212741763	rs11119974	0.75	0.75	0.75	ATF3	ENSG00000162772	CHS	0.404762	0.36853	0.428571
Surui	chr1:212649295-212811057	212741763	rs11119974	0.75	0.75	0.75	ATF3	ENSG00000162772	Cambodian	0.3	0.276562	0.35
Surui	chr1:212649295-212811057	212741763	rs11119974	0.75	0.75	0.75	ATF3	ENSG00000162772	Colombian	0.5	0.526157	0.642857
Surui	chr1:212649295-212811057	212741763	rs11119974	0.75	0.75	0.75	ATF3	ENSG00000162772	Dai	0.277778	0.186806	0.277778
Surui	chr1:212649295-212811057	212741763	rs11119974	0.75	0.75	0.75	ATF3	ENSG00000162772	Daur	0.444444	0.317938	0.444444
Surui	chr1:212649295-212811057	212741763	rs11119974	0.75	0.75	0.75	ATF3	ENSG00000162772	Hezhen	0.388889	0.258454	0.388889
Surui	chr1:212649295-212811057	212741763	rs11119974	0.75	0.75	0.75	ATF3	ENSG00000162772	JPT	0.27451	0.225703	0.284314
Surui	chr1:212649295-212811057	212741763	rs11119974	0.75	0.75	0.75	ATF3	ENSG00000162772	Japanese	0.339286	0.233705	0.357143
Surui	chr1:212649295-212811057	212741763	rs11119974	0.75	0.75	0.75	ATF3	ENSG00000162772	KHV	0.30303	0.284731	0.328283
Surui	chr1:212649295-212811057	212741763	rs11119974	0.75	0.75	0.75	ATF3	ENSG00000162772	Karitiana	0.416667	0.328767	0.541667
Surui	chr1:212649295-212811057	212741763	rs11119974	0.75	0.75	0.75	ATF3	ENSG00000162772	MXL	0.28125	0.245811	0.28125
Surui	chr1:212649295-212811057	212741763	rs11119974	0.75	0.75	0.75	ATF3	ENSG00000162772	Maya	0.547619	0.540241	0.666667
Surui	chr1:212649295-212811057	212741763	rs11119974	0.75	0.75	0.75	ATF3	ENSG00000162772	Miao	0.4	0.407627	0.45
Surui	chr1:212649295-212811057	212741763	rs11119974	0.75	0.75	0.75	ATF3	ENSG00000162772	Mongola	0.4	0.305556	0.4
Surui	chr1:212649295-212811057	212741763	rs11119974	0.75	0.75	0.75	ATF3	ENSG00000162772	Naxi	0.5	0.45873	0.5
Surui	chr1:212649295-212811057	212741763	rs11119974	0.75	0.75	0.75	ATF3	ENSG00000162772	PEL	0.417647	0.421541	0.511765
Surui	chr1:212649295-212811057	212741763	rs11119974	0.75	0.75	0.75	ATF3	ENSG00000162772	Pima	0.464286	0.349207	0.571429
Surui	chr1:212649295-212811057	212741763	rs11119974	0.75	0.75	0.75	ATF3	ENSG00000162772	Tu	0.3125	0.200868	0.375
Surui	chr1:212649295-212811057	212741763	rs11119974	0.75	0.75	0.75	ATF3	ENSG00000162772	Uygur	0.25	0.239943	0.25
Surui	chr1:212649295-212811057	212741763	rs11119974	0.75	0.75	0.75	ATF3	ENSG00000162772	Xibo	0.277778	0.0918274	0.333333
Surui	chr1:212649295-212811057	212741763	rs11119974	0.75	0.75	0.75	ATF3	ENSG00000162772	Yakut	0.26	0.272857	0.3
Surui	chr1:212649295-212811057	212742400	rs10863980	0.75	0.75	0.75	ATF3	ENSG00000162772	CHB	0.427184	0.111005	0.446602
Surui	chr1:212649295-212811057	212742400	rs10863980	0.75	0.75	0.75	ATF3	ENSG00000162772	CHS	0.404762	0.36853	0.428571
Surui	chr1:212649295-212811057	212742400	rs10863980	0.75	0.75	0.75	ATF3	ENSG00000162772	Cambodian	0.3	0.276562	0.35
Surui	chr1:212649295-212811057	212742400	rs10863980	0.75	0.75	0.75	ATF3	ENSG00000162772	Colombian	0.5	0.526157	0.642857
Surui	chr1:212649295-212811057	212742400	rs10863980	0.75	0.75	0.75	ATF3	ENSG00000162772	Dai	0.277778	0.186806	0.277778
Surui	chr1:212649295-212811057	212742400	rs10863980	0.75	0.75	0.75	ATF3	ENSG00000162772	Daur	0.444444	0.317938	0.444444
Surui	chr1:212649295-212811057	212742400	rs10863980	0.75	0.75	0.75	ATF3	ENSG00000162772	Hezhen	0.388889	0.258454	0.388889
Surui	chr1:212649295-212811057	212742400	rs10863980	0.75	0.75	0.75	ATF3	ENSG00000162772	JPT	0.27451	0.225703	0.284314
Surui	chr1:212649295-212811057	212742400	rs10863980	0.75	0.75	0.75	ATF3	ENSG00000162772	Japanese	0.339286	0.233705	0.357143
Surui	chr1:212649295-212811057	212742400	rs10863980	0.75	0.75	0.75	ATF3	ENSG00000162772	KHV	0.30303	0.284731	0.328283
Surui	chr1:212649295-212811057	212742400	rs10863980	0.75	0.75	0.75	ATF3	ENSG00000162772	Karitiana	0.416667	0.328767	0.541667
Surui	chr1:212649295-212811057	212742400	rs10863980	0.75	0.75	0.75	ATF3	ENSG00000162772	MXL	0.28125	0.245811	0.28125
Surui	chr1:212649295-212811057	212742400	rs10863980	0.75	0.75	0.75	ATF3	ENSG00000162772	Maya	0.547619	0.540241	0.666667
Surui	chr1:212649295-212811057	212742400	rs10863980	0.75	0.75	0.75	ATF3	ENSG00000162772	Miao	0.4	0.407627	0.45
Surui	chr1:212649295-212811057	212742400	rs10863980	0.75	0.75	0.75	ATF3	ENSG00000162772	Mongola	0.4	0.305556	0.4
Surui	chr1:212649295-212811057	212742400	rs10863980	0.75	0.75	0.75	ATF3	ENSG00000162772	Naxi	0.5	0.45873	0.5
Surui	chr1:212649295-212811057	212742400	rs10863980	0.75	0.75	0.75	ATF3	ENSG00000162772	PEL	0.417647	0.421541	0.511765
Surui	chr1:212649295-212811057	212742400	rs10863980	0.75	0.75	0.75	ATF3	ENSG00000162772	Pima	0.464286	0.349207	0.571429
Surui	chr1:212649295-212811057	212742400	rs10863980	0.75	0.75	0.75	ATF3	ENSG00000162772	Tu	0.3125	0.200868	0.375
Surui	chr1:212649295-212811057	212742400	rs10863980	0.75	0.75	0.75	ATF3	ENSG00000162772	Uygur	0.25	0.239943	0.25
Surui	chr1:212649295-212811057	212742400	rs10863980	0.75	0.75	0.75	ATF3	ENSG00000162772	Xibo	0.277778	0.0918274	0.333333
Surui	chr1:212649295-212811057	212742400	rs10863980	0.75	0.75	0.75	ATF3	ENSG00000162772	Yakut	0.26	0.272857	0.3
Surui	chr1:212649295-212811057	212742675	rs4951613	0.75	0.75	0.75	ATF3	ENSG00000162772	CHB	0.427184	0.111005	0.446602
Surui	chr1:212649295-212811057	212742675	rs4951613	0.75	0.75	0.75	ATF3	ENSG00000162772	CHS	0.404762	0.36853	0.428571
Surui	chr1:212649295-212811057	212742675	rs4951613	0.75	0.75	0.75	ATF3	ENSG00000162772	Cambodian	0.3	0.276562	0.35
Surui	chr1:212649295-212811057	212742675	rs4951613	0.75	0.75	0.75	ATF3	ENSG00000162772	Colombian	0.5	0.526157	0.642857
Surui	chr1:212649295-212811057	212742675	rs4951613	0.75	0.75	0.75	ATF3	ENSG00000162772	Dai	0.277778	0.186806	0.277778
Surui	chr1:212649295-212811057	212742675	rs4951613	0.75	0.75	0.75	ATF3	ENSG00000162772	Daur	0.444444	0.317938	0.444444
Surui	chr1:212649295-212811057	212742675	rs4951613	0.75	0.75	0.75	ATF3	ENSG00000162772	Hezhen	0.388889	0.258454	0.388889
Surui	chr1:212649295-212811057	212742675	rs4951613	0.75	0.75	0.75	ATF3	ENSG00000162772	JPT	0.27451	0.225703	0.284314
Surui	chr1:212649295-212811057	212742675	rs4951613	0.75	0.75	0.75	ATF3	ENSG00000162772	Japanese	0.339286	0.233705	0.357143
Surui	chr1:212649295-212811057	212742675	rs4951613	0.75	0.75	0.75	ATF3	ENSG00000162772	KHV	0.30303	0.284731	0.328283
Surui	chr1:212649295-212811057	212742675	rs4951613	0.75	0.75	0.75	ATF3	ENSG00000162772	Karitiana	0.416667	0.328767	0.541667
Surui	chr1:212649295-212811057	212742675	rs4951613	0.75	0.75	0.75	ATF3	ENSG00000162772	MXL	0.28125	0.245811	0.28125
Surui	chr1:212649295-212811057	212742675	rs4951613	0.75	0.75	0.75	ATF3	ENSG00000162772	Maya	0.547619	0.540241	0.666667
Surui	chr1:212649295-212811057	212742675	rs4951613	0.75	0.75	0.75	ATF3	ENSG00000162772	Miao	0.4	0.407627	0.45
Surui	chr1:212649295-212811057	212742675	rs4951613	0.75	0.75	0.75	ATF3	ENSG00000162772	Mongola	0.4	0.305556	0.4
Surui	chr1:212649295-212811057	212742675	rs4951613	0.75	0.75	0.75	ATF3	ENSG00000162772	Naxi	0.5	0.45873	0.5
Surui	chr1:212649295-212811057	212742675	rs4951613	0.75	0.75	0.75	ATF3	ENSG00000162772	PEL	0.417647	0.421541	0.511765
Surui	chr1:212649295-212811057	212742675	rs4951613	0.75	0.75	0.75	ATF3	ENSG00000162772	Pima	0.464286	0.349207	0.571429
Surui	chr1:212649295-212811057	212742675	rs4951613	0.75	0.75	0.75	ATF3	ENSG00000162772	Tu	0.3125	0.200868	0.375
Surui	chr1:212649295-212811057	212742675	rs4951613	0.75	0.75	0.75	ATF3	ENSG00000162772	Uygur	0.25	0.239943	0.25
Surui	chr1:212649295-212811057	212742675	rs4951613	0.75	0.75	0.75	ATF3	ENSG00000162772	Xibo	0.277778	0.0918274	0.333333
Surui	chr1:212649295-212811057	212742675	rs4951613	0.75	0.75	0.75	ATF3	ENSG00000162772	Yakut	0.26	0.272857	0.3
Surui	chr1:212649295-212811057	212744370	rs12038766	0.75	0.75	0.75	ATF3	ENSG00000162772	CHB	0.427184	0.111005	0.446602
Surui	chr1:212649295-212811057	212744370	rs12038766	0.75	0.75	0.75	ATF3	ENSG00000162772	CHS	0.404762	0.36853	0.428571
Surui	chr1:212649295-212811057	212744370	rs12038766	0.75	0.75	0.75	ATF3	ENSG00000162772	Colombian	0.5	0.526157	0.642857
Surui	chr1:212649295-212811057	212744370	rs12038766	0.75	0.75	0.75	ATF3	ENSG00000162772	Dai	0.277778	0.186806	0.277778
Surui	chr1:212649295-212811057	212744370	rs12038766	0.75	0.75	0.75	ATF3	ENSG00000162772	Daur	0.444444	0.317938	0.444444
Surui	chr1:212649295-212811057	212744370	rs12038766	0.75	0.75	0.75	ATF3	ENSG00000162772	Hezhen	0.388889	0.258454	0.388889
Surui	chr1:212649295-212811057	212744370	rs12038766	0.75	0.75	0.75	ATF3	ENSG00000162772	JPT	0.27451	0.225703	0.284314
Surui	chr1:212649295-212811057	212744370	rs12038766	0.75	0.75	0.75	ATF3	ENSG00000162772	Japanese	0.339286	0.233705	0.357143
Surui	chr1:212649295-212811057	212744370	rs12038766	0.75	0.75	0.75	ATF3	ENSG00000162772	KHV	0.30303	0.284731	0.328283
Surui	chr1:212649295-212811057	212744370	rs12038766	0.75	0.75	0.75	ATF3	ENSG00000162772	Karitiana	0.416667	0.328767	0.541667
Surui	chr1:212649295-212811057	212744370	rs12038766	0.75	0.75	0.75	ATF3	ENSG00000162772	MXL	0.28125	0.245811	0.28125
Surui	chr1:212649295-212811057	212744370	rs12038766	0.75	0.75	0.75	ATF3	ENSG00000162772	Miao	0.4	0.407627	0.45
Surui	chr1:212649295-212811057	212744370	rs12038766	0.75	0.75	0.75	ATF3	ENSG00000162772	Mongola	0.4	0.305556	0.4
Surui	chr1:212649295-212811057	212744370	rs12038766	0.75	0.75	0.75	ATF3	ENSG00000162772	Naxi	0.5	0.45873	0.5
Surui	chr1:212649295-212811057	212744370	rs12038766	0.75	0.75	0.75	ATF3	ENSG00000162772	PEL	0.417647	0.421541	0.511765
Surui	chr1:212649295-212811057	212744370	rs12038766	0.75	0.75	0.75	ATF3	ENSG00000162772	Pima	0.464286	0.349207	0.571429
Surui	chr1:212649295-212811057	212744370	rs12038766	0.75	0.75	0.75	ATF3	ENSG00000162772	Tu	0.3125	0.200868	0.375
Surui	chr1:212649295-212811057	212744370	rs12038766	0.75	0.75	0.75	ATF3	ENSG00000162772	Uygur	0.25	0.239943	0.25
Surui	chr1:212649295-212811057	212744370	rs12038766	0.75	0.75	0.75	ATF3	ENSG00000162772	Xibo	0.277778	0.0918274	0.333333
Surui	chr1:212649295-212811057	212744370	rs12038766	0.75	0.75	0.75	ATF3	ENSG00000162772	Yakut	0.26	0.272857	0.3
Surui	chr1:212649295-212811057	212747722	rs11119975	0.75	0.75	0.75	ATF3	ENSG00000162772	CHB	0.427184	0.111005	0.446602
Surui	chr1:212649295-212811057	212747722	rs11119975	0.75	0.75	0.75	ATF3	ENSG00000162772	CHS	0.404762	0.36853	0.428571
Surui	chr1:212649295-212811057	212747722	rs11119975	0.75	0.75	0.75	ATF3	ENSG00000162772	Colombian	0.5	0.526157	0.642857
Surui	chr1:212649295-212811057	212747722	rs11119975	0.75	0.75	0.75	ATF3	ENSG00000162772	Dai	0.277778	0.186806	0.277778
Surui	chr1:212649295-212811057	212747722	rs11119975	0.75	0.75	0.75	ATF3	ENSG00000162772	Daur	0.444444	0.317938	0.444444
Surui	chr1:212649295-212811057	212747722	rs11119975	0.75	0.75	0.75	ATF3	ENSG00000162772	Hezhen	0.388889	0.258454	0.388889
Surui	chr1:212649295-212811057	212747722	rs11119975	0.75	0.75	0.75	ATF3	ENSG00000162772	JPT	0.27451	0.225703	0.284314
Surui	chr1:212649295-212811057	212747722	rs11119975	0.75	0.75	0.75	ATF3	ENSG00000162772	Japanese	0.321429	0.233705	0.357143
Surui	chr1:212649295-212811057	212747722	rs11119975	0.75	0.75	0.75	ATF3	ENSG00000162772	KHV	0.30303	0.284731	0.328283
Surui	chr1:212649295-212811057	212747722	rs11119975	0.75	0.75	0.75	ATF3	ENSG00000162772	Karitiana	0.416667	0.328767	0.541667
Surui	chr1:212649295-212811057	212747722	rs11119975	0.75	0.75	0.75	ATF3	ENSG00000162772	MXL	0.273438	0.245811	0.28125
Surui	chr1:212649295-212811057	212747722	rs11119975	0.75	0.75	0.75	ATF3	ENSG00000162772	Maya	0.547619	0.540241	0.666667
Surui	chr1:212649295-212811057	212747722	rs11119975	0.75	0.75	0.75	ATF3	ENSG00000162772	Miao	0.4	0.407627	0.45
Surui	chr1:212649295-212811057	212747722	rs11119975	0.75	0.75	0.75	ATF3	ENSG00000162772	Mongola	0.4	0.305556	0.4
Surui	chr1:212649295-212811057	212747722	rs11119975	0.75	0.75	0.75	ATF3	ENSG00000162772	Naxi	0.5	0.45873	0.5
Surui	chr1:212649295-212811057	212747722	rs11119975	0.75	0.75	0.75	ATF3	ENSG00000162772	PEL	0.411765	0.421541	0.511765
Surui	chr1:212649295-212811057	212747722	rs11119975	0.75	0.75	0.75	ATF3	ENSG00000162772	Pima	0.464286	0.349207	0.571429
Surui	chr1:212649295-212811057	212747722	rs11119975	0.75	0.75	0.75	ATF3	ENSG00000162772	Tu	0.3125	0.200868	0.375
Surui	chr1:212649295-212811057	212747722	rs11119975	0.75	0.75	0.75	ATF3	ENSG00000162772	Xibo	0.277778	0.0918274	0.333333
Surui	chr1:212649295-212811057	212747722	rs11119975	0.75	0.75	0.75	ATF3	ENSG00000162772	Yakut	0.26	0.272857	0.3
Surui	chr1:212649295-212811057	212758392	rs4951618	0.75	0.75	0.75	ATF3	ENSG00000162772	CHB	0.354369	0.111005	0.446602
Surui	chr1:212649295-212811057	212758392	rs4951618	0.75	0.75	0.75	ATF3	ENSG00000162772	CHS	0.380952	0.36853	0.428571
Surui	chr1:212649295-212811057	212758392	rs4951618	0.75	0.75	0.75	ATF3	ENSG00000162772	Cambodian	0.3	0.276562	0.35
Surui	chr1:212649295-212811057	212758392	rs4951618	0.75	0.75	0.75	ATF3	ENSG00000162772	Colombian	0.5	0.526157	0.642857
Surui	chr1:212649295-212811057	212758392	rs4951618	0.75	0.75	0.75	ATF3	ENSG00000162772	Dai	0.277778	0.186806	0.277778
Surui	chr1:212649295-212811057	212758392	rs4951618	0.75	0.75	0.75	ATF3	ENSG00000162772	Daur	0.444444	0.317938	0.444444
Surui	chr1:212649295-212811057	212758392	rs4951618	0.75	0.75	0.75	ATF3	ENSG00000162772	Hezhen	0.277778	0.258454	0.388889
Surui	chr1:212649295-212811057	212758392	rs4951618	0.75	0.75	0.75	ATF3	ENSG00000162772	JPT	0.254902	0.225703	0.284314
Surui	chr1:212649295-212811057	212758392	rs4951618	0.75	0.75	0.75	ATF3	ENSG00000162772	Japanese	0.285714	0.233705	0.357143
Surui	chr1:212649295-212811057	212758392	rs4951618	0.75	0.75	0.75	ATF3	ENSG00000162772	KHV	0.287879	0.284731	0.328283
Surui	chr1:212649295-212811057	212758392	rs4951618	0.75	0.75	0.75	ATF3	ENSG00000162772	Karitiana	0.541667	0.328767	0.541667
Surui	chr1:212649295-212811057	212758392	rs4951618	0.75	0.75	0.75	ATF3	ENSG00000162772	MXL	0.273438	0.245811	0.28125
Surui	chr1:212649295-212811057	212758392	rs4951618	0.75	0.75	0.75	ATF3	ENSG00000162772	Maya	0.571429	0.540241	0.666667
Surui	chr1:212649295-212811057	212758392	rs4951618	0.75	0.75	0.75	ATF3	ENSG00000162772	Miao	0.35	0.407627	0.45
Surui	chr1:212649295-212811057	212758392	rs4951618	0.75	0.75	0.75	ATF3	ENSG00000162772	Mongola	0.35	0.305556	0.4
Surui	chr1:212649295-212811057	212758392	rs4951618	0.75	0.75	0.75	ATF3	ENSG00000162772	Naxi	0.5	0.45873	0.5
Surui	chr1:212649295-212811057	212758392	rs4951618	0.75	0.75	0.75	ATF3	ENSG00000162772	PEL	0.405882	0.421541	0.511765
Surui	chr1:212649295-212811057	212758392	rs4951618	0.75	0.75	0.75	ATF3	ENSG00000162772	PUR	0.225962	0.169384	0.225962
Surui	chr1:212649295-212811057	212758392	rs4951618	0.75	0.75	0.75	ATF3	ENSG00000162772	Pima	0.571429	0.349207	0.571429
Surui	chr1:212649295-212811057	212758392	rs4951618	0.75	0.75	0.75	ATF3	ENSG00000162772	Tu	0.3125	0.200868	0.375
Surui	chr1:212649295-212811057	212758392	rs4951618	0.75	0.75	0.75	ATF3	ENSG00000162772	Xibo	0.222222	0.0918274	0.333333
Surui	chr1:212649295-212811057	212758392	rs4951618	0.75	0.75	0.75	ATF3	ENSG00000162772	Yakut	0.26	0.272857	0.3
Surui	chr1:212649295-212811057	212758604	rs1105899	0.75	0.75	0.75	ATF3	ENSG00000162772	CHB	0.354369	0.111005	0.446602
Surui	chr1:212649295-212811057	212758604	rs1105899	0.75	0.75	0.75	ATF3	ENSG00000162772	CHS	0.395238	0.36853	0.428571
Surui	chr1:212649295-212811057	212758604	rs1105899	0.75	0.75	0.75	ATF3	ENSG00000162772	Colombian	0.5	0.526157	0.642857
Surui	chr1:212649295-212811057	212758604	rs1105899	0.75	0.75	0.75	ATF3	ENSG00000162772	Dai	0.277778	0.186806	0.277778
Surui	chr1:212649295-212811057	212758604	rs1105899	0.75	0.75	0.75	ATF3	ENSG00000162772	Daur	0.388889	0.317938	0.444444
Surui	chr1:212649295-212811057	212758604	rs1105899	0.75	0.75	0.75	ATF3	ENSG00000162772	JPT	0.264706	0.225703	0.284314
Surui	chr1:212649295-212811057	212758604	rs1105899	0.75	0.75	0.75	ATF3	ENSG00000162772	Japanese	0.339286	0.233705	0.357143
Surui	chr1:212649295-212811057	212758604	rs1105899	0.75	0.75	0.75	ATF3	ENSG00000162772	KHV	0.277778	0.284731	0.328283
Surui	chr1:212649295-212811057	212758604	rs1105899	0.75	0.75	0.75	ATF3	ENSG00000162772	Karitiana	0.541667	0.328767	0.541667
Surui	chr1:212649295-212811057	212758604	rs1105899	0.75	0.75	0.75	ATF3	ENSG00000162772	Maya	0.571429	0.540241	0.666667
Surui	chr1:212649295-212811057	212758604	rs1105899	0.75	0.75	0.75	ATF3	ENSG00000162772	Miao	0.35	0.407627	0.45
Surui	chr1:212649295-212811057	212758604	rs1105899	0.75	0.75	0.75	ATF3	ENSG00000162772	Mongola	0.35	0.305556	0.4
Surui	chr1:212649295-212811057	212758604	rs1105899	0.75	0.75	0.75	ATF3	ENSG00000162772	Naxi	0.5	0.45873	0.5
Surui	chr1:212649295-212811057	212758604	rs1105899	0.75	0.75	0.75	ATF3	ENSG00000162772	PEL	0.394118	0.421541	0.511765
Surui	chr1:212649295-212811057	212758604	rs1105899	0.75	0.75	0.75	ATF3	ENSG00000162772	Pima	0.5	0.349207	0.571429
Surui	chr1:212649295-212811057	212758604	rs1105899	0.75	0.75	0.75	ATF3	ENSG00000162772	Tu	0.25	0.200868	0.375
Surui	chr1:212649295-212811057	212758604	rs1105899	0.75	0.75	0.75	ATF3	ENSG00000162772	Xibo	0.222222	0.0918274	0.333333
Surui	chr1:212649295-212811057	212758604	rs1105899	0.75	0.75	0.75	ATF3	ENSG00000162772	Yakut	0.26	0.272857	0.3
Surui	chr1:212649295-212811057	212759493	rs6674072	0.75	0.75	0.75	ATF3	ENSG00000162772	CHB	0.334951	0.111005	0.446602
Surui	chr1:212649295-212811057	212759493	rs6674072	0.75	0.75	0.75	ATF3	ENSG00000162772	CHS	0.371429	0.36853	0.428571
Surui	chr1:212649295-212811057	212759493	rs6674072	0.75	0.75	0.75	ATF3	ENSG00000162772	Cambodian	0.25	0.276562	0.35
Surui	chr1:212649295-212811057	212759493	rs6674072	0.75	0.75	0.75	ATF3	ENSG00000162772	Colombian	0.5	0.526157	0.642857
Surui	chr1:212649295-212811057	212759493	rs6674072	0.75	0.75	0.75	ATF3	ENSG00000162772	Dai	0.277778	0.186806	0.277778
Surui	chr1:212649295-212811057	212759493	rs6674072	0.75	0.75	0.75	ATF3	ENSG00000162772	Daur	0.444444	0.317938	0.444444
Surui	chr1:212649295-212811057	212759493	rs6674072	0.75	0.75	0.75	ATF3	ENSG00000162772	Hezhen	0.277778	0.258454	0.388889
Surui	chr1:212649295-212811057	212759493	rs6674072	0.75	0.75	0.75	ATF3	ENSG00000162772	JPT	0.254902	0.225703	0.284314
Surui	chr1:212649295-212811057	212759493	rs6674072	0.75	0.75	0.75	ATF3	ENSG00000162772	Japanese	0.303571	0.233705	0.357143
Surui	chr1:212649295-212811057	212759493	rs6674072	0.75	0.75	0.75	ATF3	ENSG00000162772	KHV	0.277778	0.284731	0.328283
Surui	chr1:212649295-212811057	212759493	rs6674072	0.75	0.75	0.75	ATF3	ENSG00000162772	Karitiana	0.541667	0.328767	0.541667
Surui	chr1:212649295-212811057	212759493	rs6674072	0.75	0.75	0.75	ATF3	ENSG00000162772	MXL	0.273438	0.245811	0.28125
Surui	chr1:212649295-212811057	212759493	rs6674072	0.75	0.75	0.75	ATF3	ENSG00000162772	Maya	0.571429	0.540241	0.666667
Surui	chr1:212649295-212811057	212759493	rs6674072	0.75	0.75	0.75	ATF3	ENSG00000162772	Miao	0.35	0.407627	0.45
Surui	chr1:212649295-212811057	212759493	rs6674072	0.75	0.75	0.75	ATF3	ENSG00000162772	Mongola	0.35	0.305556	0.4
Surui	chr1:212649295-212811057	212759493	rs6674072	0.75	0.75	0.75	ATF3	ENSG00000162772	Naxi	0.5	0.45873	0.5
Surui	chr1:212649295-212811057	212759493	rs6674072	0.75	0.75	0.75	ATF3	ENSG00000162772	PEL	0.405882	0.421541	0.511765
Surui	chr1:212649295-212811057	212759493	rs6674072	0.75	0.75	0.75	ATF3	ENSG00000162772	Pima	0.464286	0.349207	0.571429
Surui	chr1:212649295-212811057	212759493	rs6674072	0.75	0.75	0.75	ATF3	ENSG00000162772	Tu	0.25	0.200868	0.375
Surui	chr1:212649295-212811057	212759493	rs6674072	0.75	0.75	0.75	ATF3	ENSG00000162772	Xibo	0.277778	0.0918274	0.333333
Surui	chr1:212649295-212811057	212759493	rs6674072	0.75	0.75	0.75	ATF3	ENSG00000162772	Yakut	0.28	0.272857	0.3
Surui	chr1:212649295-212811057	212766199	rs1976657	0.75	0.75	0.75	ATF3	ENSG00000162772	CHB	0.218447	0.111005	0.446602
Surui	chr1:212649295-212811057	212766199	rs1976657	0.75	0.75	0.75	ATF3	ENSG00000162772	CHS	0.204762	0.36853	0.428571
Surui	chr1:212649295-212811057	212766199	rs1976657	0.75	0.75	0.75	ATF3	ENSG00000162772	CLM	0.201087	0.186358	0.233696
Surui	chr1:212649295-212811057	212766199	rs1976657	0.75	0.75	0.75	ATF3	ENSG00000162772	Colombian	0.642857	0.526157	0.642857
Surui	chr1:212649295-212811057	212766199	rs1976657	0.75	0.75	0.75	ATF3	ENSG00000162772	Daur	0.222222	0.317938	0.444444
Surui	chr1:212649295-212811057	212766199	rs1976657	0.75	0.75	0.75	ATF3	ENSG00000162772	Japanese	0.214286	0.233705	0.357143
Surui	chr1:212649295-212811057	212766199	rs1976657	0.75	0.75	0.75	ATF3	ENSG00000162772	Karitiana	0.458333	0.328767	0.541667
Surui	chr1:212649295-212811057	212766199	rs1976657	0.75	0.75	0.75	ATF3	ENSG00000162772	MXL	0.257812	0.245811	0.28125
Surui	chr1:212649295-212811057	212766199	rs1976657	0.75	0.75	0.75	ATF3	ENSG00000162772	Maya	0.666667	0.540241	0.666667
Surui	chr1:212649295-212811057	212766199	rs1976657	0.75	0.75	0.75	ATF3	ENSG00000162772	Mongola	0.25	0.305556	0.4
Surui	chr1:212649295-212811057	212766199	rs1976657	0.75	0.75	0.75	ATF3	ENSG00000162772	Naxi	0.277778	0.45873	0.5
Surui	chr1:212649295-212811057	212766199	rs1976657	0.75	0.75	0.75	ATF3	ENSG00000162772	PEL	0.470588	0.421541	0.511765
Surui	chr1:212649295-212811057	212766199	rs1976657	0.75	0.75	0.75	ATF3	ENSG00000162772	Pima	0.428571	0.349207	0.571429
Surui	chr1:212649295-212811057	212766199	rs1976657	0.75	0.75	0.75	ATF3	ENSG00000162772	Yakut	0.28	0.272857	0.3
Surui	chr1:212649295-212811057	212768599	rs1567709	0.75	0.75	0.75	ATF3	ENSG00000162772	CHB	0.213592	0.111005	0.446602
Surui	chr1:212649295-212811057	212768599	rs1567709	0.75	0.75	0.75	ATF3	ENSG00000162772	CHS	0.204762	0.36853	0.428571
Surui	chr1:212649295-212811057	212768599	rs1567709	0.75	0.75	0.75	ATF3	ENSG00000162772	CLM	0.201087	0.186358	0.233696
Surui	chr1:212649295-212811057	212768599	rs1567709	0.75	0.75	0.75	ATF3	ENSG00000162772	Colombian	0.642857	0.526157	0.642857
Surui	chr1:212649295-212811057	212768599	rs1567709	0.75	0.75	0.75	ATF3	ENSG00000162772	Daur	0.222222	0.317938	0.444444
Surui	chr1:212649295-212811057	212768599	rs1567709	0.75	0.75	0.75	ATF3	ENSG00000162772	Japanese	0.214286	0.233705	0.357143
Surui	chr1:212649295-212811057	212768599	rs1567709	0.75	0.75	0.75	ATF3	ENSG00000162772	Karitiana	0.458333	0.328767	0.541667
Surui	chr1:212649295-212811057	212768599	rs1567709	0.75	0.75	0.75	ATF3	ENSG00000162772	MXL	0.257812	0.245811	0.28125
Surui	chr1:212649295-212811057	212768599	rs1567709	0.75	0.75	0.75	ATF3	ENSG00000162772	Maya	0.666667	0.540241	0.666667
Surui	chr1:212649295-212811057	212768599	rs1567709	0.75	0.75	0.75	ATF3	ENSG00000162772	Mongola	0.25	0.305556	0.4
Surui	chr1:212649295-212811057	212768599	rs1567709	0.75	0.75	0.75	ATF3	ENSG00000162772	Naxi	0.277778	0.45873	0.5
Surui	chr1:212649295-212811057	212768599	rs1567709	0.75	0.75	0.75	ATF3	ENSG00000162772	PEL	0.476471	0.421541	0.511765
Surui	chr1:212649295-212811057	212768599	rs1567709	0.75	0.75	0.75	ATF3	ENSG00000162772	Pima	0.428571	0.349207	0.571429
Surui	chr1:212649295-212811057	212768599	rs1567709	0.75	0.75	0.75	ATF3	ENSG00000162772	Yakut	0.28	0.272857	0.3
Surui	chr1:212649295-212811057	212769016	rs3122722	0.75	0.75	0.75	ATF3	ENSG00000162772	CHB	0.218447	0.111005	0.446602
Surui	chr1:212649295-212811057	212769016	rs3122722	0.75	0.75	0.75	ATF3	ENSG00000162772	CHS	0.204762	0.36853	0.428571
Surui	chr1:212649295-212811057	212769016	rs3122722	0.75	0.75	0.75	ATF3	ENSG00000162772	CLM	0.201087	0.186358	0.233696
Surui	chr1:212649295-212811057	212769016	rs3122722	0.75	0.75	0.75	ATF3	ENSG00000162772	Colombian	0.642857	0.526157	0.642857
Surui	chr1:212649295-212811057	212769016	rs3122722	0.75	0.75	0.75	ATF3	ENSG00000162772	Daur	0.222222	0.317938	0.444444
Surui	chr1:212649295-212811057	212769016	rs3122722	0.75	0.75	0.75	ATF3	ENSG00000162772	Japanese	0.214286	0.233705	0.357143
Surui	chr1:212649295-212811057	212769016	rs3122722	0.75	0.75	0.75	ATF3	ENSG00000162772	Karitiana	0.458333	0.328767	0.541667
Surui	chr1:212649295-212811057	212769016	rs3122722	0.75	0.75	0.75	ATF3	ENSG00000162772	MXL	0.257812	0.245811	0.28125
Surui	chr1:212649295-212811057	212769016	rs3122722	0.75	0.75	0.75	ATF3	ENSG00000162772	Maya	0.666667	0.540241	0.666667
Surui	chr1:212649295-212811057	212769016	rs3122722	0.75	0.75	0.75	ATF3	ENSG00000162772	Mongola	0.25	0.305556	0.4
Surui	chr1:212649295-212811057	212769016	rs3122722	0.75	0.75	0.75	ATF3	ENSG00000162772	Naxi	0.277778	0.45873	0.5
Surui	chr1:212649295-212811057	212769016	rs3122722	0.75	0.75	0.75	ATF3	ENSG00000162772	PEL	0.476471	0.421541	0.511765
Surui	chr1:212649295-212811057	212769016	rs3122722	0.75	0.75	0.75	ATF3	ENSG00000162772	Pima	0.428571	0.349207	0.571429
Surui	chr1:212649295-212811057	212769016	rs3122722	0.75	0.75	0.75	ATF3	ENSG00000162772	Yakut	0.28	0.272857	0.3
Surui	chr1:212649295-212811057	212774757	rs4951625	0.75	0.75	0.75	ATF3	ENSG00000162772	Colombian	0.642857	0.526157	0.642857
Surui	chr1:212649295-212811057	212774757	rs4951625	0.75	0.75	0.75	ATF3	ENSG00000162772	Karitiana	0.458333	0.328767	0.541667
Surui	chr1:212649295-212811057	212774757	rs4951625	0.75	0.75	0.75	ATF3	ENSG00000162772	MXL	0.25	0.245811	0.28125
Surui	chr1:212649295-212811057	212774757	rs4951625	0.75	0.75	0.75	ATF3	ENSG00000162772	Maya	0.619048	0.540241	0.666667
Surui	chr1:212649295-212811057	212774757	rs4951625	0.75	0.75	0.75	ATF3	ENSG00000162772	Mongola	0.2	0.305556	0.4
Surui	chr1:212649295-212811057	212774757	rs4951625	0.75	0.75	0.75	ATF3	ENSG00000162772	Naxi	0.222222	0.45873	0.5
Surui	chr1:212649295-212811057	212774757	rs4951625	0.75	0.75	0.75	ATF3	ENSG00000162772	PEL	0.447059	0.421541	0.511765
Surui	chr1:212649295-212811057	212774757	rs4951625	0.75	0.75	0.75	ATF3	ENSG00000162772	Pima	0.392857	0.349207	0.571429
Surui	chr1:212649295-212811057	212774757	rs4951625	0.75	0.75	0.75	ATF3	ENSG00000162772	Yakut	0.24	0.272857	0.3
Surui	chr1:212649295-212811057	212775529	rs12564392	0.75	0.75	0.75	ATF3	ENSG00000162772	Colombian	0.642857	0.526157	0.642857
Surui	chr1:212649295-212811057	212775529	rs12564392	0.75	0.75	0.75	ATF3	ENSG00000162772	Karitiana	0.458333	0.328767	0.541667
Surui	chr1:212649295-212811057	212775529	rs12564392	0.75	0.75	0.75	ATF3	ENSG00000162772	MXL	0.25	0.245811	0.28125
Surui	chr1:212649295-212811057	212775529	rs12564392	0.75	0.75	0.75	ATF3	ENSG00000162772	Maya	0.619048	0.540241	0.666667
Surui	chr1:212649295-212811057	212775529	rs12564392	0.75	0.75	0.75	ATF3	ENSG00000162772	Mongola	0.2	0.305556	0.4
Surui	chr1:212649295-212811057	212775529	rs12564392	0.75	0.75	0.75	ATF3	ENSG00000162772	Naxi	0.222222	0.45873	0.5
Surui	chr1:212649295-212811057	212775529	rs12564392	0.75	0.75	0.75	ATF3	ENSG00000162772	PEL	0.447059	0.421541	0.511765
Surui	chr1:212649295-212811057	212775529	rs12564392	0.75	0.75	0.75	ATF3	ENSG00000162772	Pima	0.392857	0.349207	0.571429
Surui	chr1:212649295-212811057	212775529	rs12564392	0.75	0.75	0.75	ATF3	ENSG00000162772	Yakut	0.24	0.272857	0.3
Surui	chr1:212649295-212811057	212785414	rs11571530	0.75	0.75	0.75	ATF3	ENSG00000162772	Colombian	0.642857	0.526157	0.642857
Surui	chr1:212649295-212811057	212785414	rs11571530	0.75	0.75	0.75	ATF3	ENSG00000162772	Karitiana	0.458333	0.328767	0.541667
Surui	chr1:212649295-212811057	212785414	rs11571530	0.75	0.75	0.75	ATF3	ENSG00000162772	MXL	0.25	0.245811	0.28125
Surui	chr1:212649295-212811057	212785414	rs11571530	0.75	0.75	0.75	ATF3	ENSG00000162772	Maya	0.619048	0.540241	0.666667
Surui	chr1:212649295-212811057	212785414	rs11571530	0.75	0.75	0.75	ATF3	ENSG00000162772	Mongola	0.2	0.305556	0.4
Surui	chr1:212649295-212811057	212785414	rs11571530	0.75	0.75	0.75	ATF3	ENSG00000162772	Naxi	0.222222	0.45873	0.5
Surui	chr1:212649295-212811057	212785414	rs11571530	0.75	0.75	0.75	ATF3	ENSG00000162772	PEL	0.452941	0.421541	0.511765
Surui	chr1:212649295-212811057	212785414	rs11571530	0.75	0.75	0.75	ATF3	ENSG00000162772	Pima	0.464286	0.349207	0.571429
Surui	chr1:212649295-212811057	212785414	rs11571530	0.75	0.75	0.75	ATF3	ENSG00000162772	Yakut	0.24	0.272857	0.3
Surui	chr1:212649295-212811057	212788567	rs2229346	0.75	0.75	0.75	ATF3	ENSG00000162772	Colombian	0.642857	0.526157	0.642857
Surui	chr1:212649295-212811057	212788567	rs2229346	0.75	0.75	0.75	ATF3	ENSG00000162772	Karitiana	0.458333	0.328767	0.541667
Surui	chr1:212649295-212811057	212788567	rs2229346	0.75	0.75	0.75	ATF3	ENSG00000162772	MXL	0.25	0.245811	0.28125
Surui	chr1:212649295-212811057	212788567	rs2229346	0.75	0.75	0.75	ATF3	ENSG00000162772	Maya	0.619048	0.540241	0.666667
Surui	chr1:212649295-212811057	212788567	rs2229346	0.75	0.75	0.75	ATF3	ENSG00000162772	Mongola	0.2	0.305556	0.4
Surui	chr1:212649295-212811057	212788567	rs2229346	0.75	0.75	0.75	ATF3	ENSG00000162772	Naxi	0.222222	0.45873	0.5
Surui	chr1:212649295-212811057	212788567	rs2229346	0.75	0.75	0.75	ATF3	ENSG00000162772	PEL	0.447059	0.421541	0.511765
Surui	chr1:212649295-212811057	212788567	rs2229346	0.75	0.75	0.75	ATF3	ENSG00000162772	Pima	0.464286	0.349207	0.571429
Surui	chr1:212649295-212811057	212788567	rs2229346	0.75	0.75	0.75	ATF3	ENSG00000162772	Yakut	0.24	0.272857	0.3
Maya	chr1:212649295-212811057	212766199	rs1976657	0.666667	0.540241	0.666667	ATF3	ENSG00000162772	CHB	0.218447	0.111005	0.446602
Maya	chr1:212649295-212811057	212766199	rs1976657	0.666667	0.540241	0.666667	ATF3	ENSG00000162772	CHS	0.204762	0.36853	0.428571
Maya	chr1:212649295-212811057	212766199	rs1976657	0.666667	0.540241	0.666667	ATF3	ENSG00000162772	CLM	0.201087	0.186358	0.233696
Maya	chr1:212649295-212811057	212766199	rs1976657	0.666667	0.540241	0.666667	ATF3	ENSG00000162772	Colombian	0.642857	0.526157	0.642857
Maya	chr1:212649295-212811057	212766199	rs1976657	0.666667	0.540241	0.666667	ATF3	ENSG00000162772	Daur	0.222222	0.317938	0.444444
Maya	chr1:212649295-212811057	212766199	rs1976657	0.666667	0.540241	0.666667	ATF3	ENSG00000162772	Japanese	0.214286	0.233705	0.357143
Maya	chr1:212649295-212811057	212766199	rs1976657	0.666667	0.540241	0.666667	ATF3	ENSG00000162772	Karitiana	0.458333	0.328767	0.541667
Maya	chr1:212649295-212811057	212766199	rs1976657	0.666667	0.540241	0.666667	ATF3	ENSG00000162772	MXL	0.257812	0.245811	0.28125
Maya	chr1:212649295-212811057	212766199	rs1976657	0.666667	0.540241	0.666667	ATF3	ENSG00000162772	Mongola	0.25	0.305556	0.4
Maya	chr1:212649295-212811057	212766199	rs1976657	0.666667	0.540241	0.666667	ATF3	ENSG00000162772	Naxi	0.277778	0.45873	0.5
Maya	chr1:212649295-212811057	212766199	rs1976657	0.666667	0.540241	0.666667	ATF3	ENSG00000162772	PEL	0.470588	0.421541	0.511765
Maya	chr1:212649295-212811057	212766199	rs1976657	0.666667	0.540241	0.666667	ATF3	ENSG00000162772	Pima	0.428571	0.349207	0.571429
Maya	chr1:212649295-212811057	212766199	rs1976657	0.666667	0.540241	0.666667	ATF3	ENSG00000162772	Surui	0.75	0.75	0.75
Maya	chr1:212649295-212811057	212766199	rs1976657	0.666667	0.540241	0.666667	ATF3	ENSG00000162772	Yakut	0.28	0.272857	0.3
Maya	chr1:212649295-212811057	212768599	rs1567709	0.666667	0.540241	0.666667	ATF3	ENSG00000162772	CHB	0.213592	0.111005	0.446602
Maya	chr1:212649295-212811057	212768599	rs1567709	0.666667	0.540241	0.666667	ATF3	ENSG00000162772	CHS	0.204762	0.36853	0.428571
Maya	chr1:212649295-212811057	212768599	rs1567709	0.666667	0.540241	0.666667	ATF3	ENSG00000162772	CLM	0.201087	0.186358	0.233696
Maya	chr1:212649295-212811057	212768599	rs1567709	0.666667	0.540241	0.666667	ATF3	ENSG00000162772	Colombian	0.642857	0.526157	0.642857
Maya	chr1:212649295-212811057	212768599	rs1567709	0.666667	0.540241	0.666667	ATF3	ENSG00000162772	Daur	0.222222	0.317938	0.444444
Maya	chr1:212649295-212811057	212768599	rs1567709	0.666667	0.540241	0.666667	ATF3	ENSG00000162772	Japanese	0.214286	0.233705	0.357143
Maya	chr1:212649295-212811057	212768599	rs1567709	0.666667	0.540241	0.666667	ATF3	ENSG00000162772	Karitiana	0.458333	0.328767	0.541667
Maya	chr1:212649295-212811057	212768599	rs1567709	0.666667	0.540241	0.666667	ATF3	ENSG00000162772	MXL	0.257812	0.245811	0.28125
Maya	chr1:212649295-212811057	212768599	rs1567709	0.666667	0.540241	0.666667	ATF3	ENSG00000162772	Mongola	0.25	0.305556	0.4
Maya	chr1:212649295-212811057	212768599	rs1567709	0.666667	0.540241	0.666667	ATF3	ENSG00000162772	Naxi	0.277778	0.45873	0.5
Maya	chr1:212649295-212811057	212768599	rs1567709	0.666667	0.540241	0.666667	ATF3	ENSG00000162772	PEL	0.476471	0.421541	0.511765
Maya	chr1:212649295-212811057	212768599	rs1567709	0.666667	0.540241	0.666667	ATF3	ENSG00000162772	Pima	0.428571	0.349207	0.571429
Maya	chr1:212649295-212811057	212768599	rs1567709	0.666667	0.540241	0.666667	ATF3	ENSG00000162772	Surui	0.75	0.75	0.75
Maya	chr1:212649295-212811057	212768599	rs1567709	0.666667	0.540241	0.666667	ATF3	ENSG00000162772	Yakut	0.28	0.272857	0.3
Maya	chr1:212649295-212811057	212769016	rs3122722	0.666667	0.540241	0.666667	ATF3	ENSG00000162772	CHB	0.218447	0.111005	0.446602
Maya	chr1:212649295-212811057	212769016	rs3122722	0.666667	0.540241	0.666667	ATF3	ENSG00000162772	CHS	0.204762	0.36853	0.428571
Maya	chr1:212649295-212811057	212769016	rs3122722	0.666667	0.540241	0.666667	ATF3	ENSG00000162772	CLM	0.201087	0.186358	0.233696
Maya	chr1:212649295-212811057	212769016	rs3122722	0.666667	0.540241	0.666667	ATF3	ENSG00000162772	Colombian	0.642857	0.526157	0.642857
Maya	chr1:212649295-212811057	212769016	rs3122722	0.666667	0.540241	0.666667	ATF3	ENSG00000162772	Daur	0.222222	0.317938	0.444444
Maya	chr1:212649295-212811057	212769016	rs3122722	0.666667	0.540241	0.666667	ATF3	ENSG00000162772	Japanese	0.214286	0.233705	0.357143
Maya	chr1:212649295-212811057	212769016	rs3122722	0.666667	0.540241	0.666667	ATF3	ENSG00000162772	Karitiana	0.458333	0.328767	0.541667
Maya	chr1:212649295-212811057	212769016	rs3122722	0.666667	0.540241	0.666667	ATF3	ENSG00000162772	MXL	0.257812	0.245811	0.28125
Maya	chr1:212649295-212811057	212769016	rs3122722	0.666667	0.540241	0.666667	ATF3	ENSG00000162772	Mongola	0.25	0.305556	0.4
Maya	chr1:212649295-212811057	212769016	rs3122722	0.666667	0.540241	0.666667	ATF3	ENSG00000162772	Naxi	0.277778	0.45873	0.5
Maya	chr1:212649295-212811057	212769016	rs3122722	0.666667	0.540241	0.666667	ATF3	ENSG00000162772	PEL	0.476471	0.421541	0.511765
Maya	chr1:212649295-212811057	212769016	rs3122722	0.666667	0.540241	0.666667	ATF3	ENSG00000162772	Pima	0.428571	0.349207	0.571429
Maya	chr1:212649295-212811057	212769016	rs3122722	0.666667	0.540241	0.666667	ATF3	ENSG00000162772	Surui	0.75	0.75	0.75
Maya	chr1:212649295-212811057	212769016	rs3122722	0.666667	0.540241	0.666667	ATF3	ENSG00000162772	Yakut	0.28	0.272857	0.3
Colombian	chr1:212649295-212811057	212766199	rs1976657	0.642857	0.526157	0.642857	ATF3	ENSG00000162772	CHB	0.218447	0.111005	0.446602
Colombian	chr1:212649295-212811057	212766199	rs1976657	0.642857	0.526157	0.642857	ATF3	ENSG00000162772	CHS	0.204762	0.36853	0.428571
Colombian	chr1:212649295-212811057	212766199	rs1976657	0.642857	0.526157	0.642857	ATF3	ENSG00000162772	CLM	0.201087	0.186358	0.233696
Colombian	chr1:212649295-212811057	212766199	rs1976657	0.642857	0.526157	0.642857	ATF3	ENSG00000162772	Daur	0.222222	0.317938	0.444444
Colombian	chr1:212649295-212811057	212766199	rs1976657	0.642857	0.526157	0.642857	ATF3	ENSG00000162772	Japanese	0.214286	0.233705	0.357143
Colombian	chr1:212649295-212811057	212766199	rs1976657	0.642857	0.526157	0.642857	ATF3	ENSG00000162772	Karitiana	0.458333	0.328767	0.541667
Colombian	chr1:212649295-212811057	212766199	rs1976657	0.642857	0.526157	0.642857	ATF3	ENSG00000162772	MXL	0.257812	0.245811	0.28125
Colombian	chr1:212649295-212811057	212766199	rs1976657	0.642857	0.526157	0.642857	ATF3	ENSG00000162772	Maya	0.666667	0.540241	0.666667
Colombian	chr1:212649295-212811057	212766199	rs1976657	0.642857	0.526157	0.642857	ATF3	ENSG00000162772	Mongola	0.25	0.305556	0.4
Colombian	chr1:212649295-212811057	212766199	rs1976657	0.642857	0.526157	0.642857	ATF3	ENSG00000162772	Naxi	0.277778	0.45873	0.5
Colombian	chr1:212649295-212811057	212766199	rs1976657	0.642857	0.526157	0.642857	ATF3	ENSG00000162772	PEL	0.470588	0.421541	0.511765
Colombian	chr1:212649295-212811057	212766199	rs1976657	0.642857	0.526157	0.642857	ATF3	ENSG00000162772	Pima	0.428571	0.349207	0.571429
Colombian	chr1:212649295-212811057	212766199	rs1976657	0.642857	0.526157	0.642857	ATF3	ENSG00000162772	Surui	0.75	0.75	0.75
Colombian	chr1:212649295-212811057	212766199	rs1976657	0.642857	0.526157	0.642857	ATF3	ENSG00000162772	Yakut	0.28	0.272857	0.3
Colombian	chr1:212649295-212811057	212768599	rs1567709	0.642857	0.526157	0.642857	ATF3	ENSG00000162772	CHB	0.213592	0.111005	0.446602
Colombian	chr1:212649295-212811057	212768599	rs1567709	0.642857	0.526157	0.642857	ATF3	ENSG00000162772	CHS	0.204762	0.36853	0.428571
Colombian	chr1:212649295-212811057	212768599	rs1567709	0.642857	0.526157	0.642857	ATF3	ENSG00000162772	CLM	0.201087	0.186358	0.233696
Colombian	chr1:212649295-212811057	212768599	rs1567709	0.642857	0.526157	0.642857	ATF3	ENSG00000162772	Daur	0.222222	0.317938	0.444444
Colombian	chr1:212649295-212811057	212768599	rs1567709	0.642857	0.526157	0.642857	ATF3	ENSG00000162772	Japanese	0.214286	0.233705	0.357143
Colombian	chr1:212649295-212811057	212768599	rs1567709	0.642857	0.526157	0.642857	ATF3	ENSG00000162772	Karitiana	0.458333	0.328767	0.541667
Colombian	chr1:212649295-212811057	212768599	rs1567709	0.642857	0.526157	0.642857	ATF3	ENSG00000162772	MXL	0.257812	0.245811	0.28125
Colombian	chr1:212649295-212811057	212768599	rs1567709	0.642857	0.526157	0.642857	ATF3	ENSG00000162772	Maya	0.666667	0.540241	0.666667
Colombian	chr1:212649295-212811057	212768599	rs1567709	0.642857	0.526157	0.642857	ATF3	ENSG00000162772	Mongola	0.25	0.305556	0.4
Colombian	chr1:212649295-212811057	212768599	rs1567709	0.642857	0.526157	0.642857	ATF3	ENSG00000162772	Naxi	0.277778	0.45873	0.5
Colombian	chr1:212649295-212811057	212768599	rs1567709	0.642857	0.526157	0.642857	ATF3	ENSG00000162772	PEL	0.476471	0.421541	0.511765
Colombian	chr1:212649295-212811057	212768599	rs1567709	0.642857	0.526157	0.642857	ATF3	ENSG00000162772	Pima	0.428571	0.349207	0.571429
Colombian	chr1:212649295-212811057	212768599	rs1567709	0.642857	0.526157	0.642857	ATF3	ENSG00000162772	Surui	0.75	0.75	0.75
Colombian	chr1:212649295-212811057	212768599	rs1567709	0.642857	0.526157	0.642857	ATF3	ENSG00000162772	Yakut	0.28	0.272857	0.3
Colombian	chr1:212649295-212811057	212769016	rs3122722	0.642857	0.526157	0.642857	ATF3	ENSG00000162772	CHB	0.218447	0.111005	0.446602
Colombian	chr1:212649295-212811057	212769016	rs3122722	0.642857	0.526157	0.642857	ATF3	ENSG00000162772	CHS	0.204762	0.36853	0.428571
Colombian	chr1:212649295-212811057	212769016	rs3122722	0.642857	0.526157	0.642857	ATF3	ENSG00000162772	CLM	0.201087	0.186358	0.233696
Colombian	chr1:212649295-212811057	212769016	rs3122722	0.642857	0.526157	0.642857	ATF3	ENSG00000162772	Daur	0.222222	0.317938	0.444444
Colombian	chr1:212649295-212811057	212769016	rs3122722	0.642857	0.526157	0.642857	ATF3	ENSG00000162772	Japanese	0.214286	0.233705	0.357143
Colombian	chr1:212649295-212811057	212769016	rs3122722	0.642857	0.526157	0.642857	ATF3	ENSG00000162772	Karitiana	0.458333	0.328767	0.541667
Colombian	chr1:212649295-212811057	212769016	rs3122722	0.642857	0.526157	0.642857	ATF3	ENSG00000162772	MXL	0.257812	0.245811	0.28125
Colombian	chr1:212649295-212811057	212769016	rs3122722	0.642857	0.526157	0.642857	ATF3	ENSG00000162772	Maya	0.666667	0.540241	0.666667
Colombian	chr1:212649295-212811057	212769016	rs3122722	0.642857	0.526157	0.642857	ATF3	ENSG00000162772	Mongola	0.25	0.305556	0.4
Colombian	chr1:212649295-212811057	212769016	rs3122722	0.642857	0.526157	0.642857	ATF3	ENSG00000162772	Naxi	0.277778	0.45873	0.5
Colombian	chr1:212649295-212811057	212769016	rs3122722	0.642857	0.526157	0.642857	ATF3	ENSG00000162772	PEL	0.476471	0.421541	0.511765
Colombian	chr1:212649295-212811057	212769016	rs3122722	0.642857	0.526157	0.642857	ATF3	ENSG00000162772	Pima	0.428571	0.349207	0.571429
Colombian	chr1:212649295-212811057	212769016	rs3122722	0.642857	0.526157	0.642857	ATF3	ENSG00000162772	Surui	0.75	0.75	0.75
Colombian	chr1:212649295-212811057	212769016	rs3122722	0.642857	0.526157	0.642857	ATF3	ENSG00000162772	Yakut	0.28	0.272857	0.3
Colombian	chr1:212649295-212811057	212774757	rs4951625	0.642857	0.526157	0.642857	ATF3	ENSG00000162772	Karitiana	0.458333	0.328767	0.541667
Colombian	chr1:212649295-212811057	212774757	rs4951625	0.642857	0.526157	0.642857	ATF3	ENSG00000162772	MXL	0.25	0.245811	0.28125
Colombian	chr1:212649295-212811057	212774757	rs4951625	0.642857	0.526157	0.642857	ATF3	ENSG00000162772	Maya	0.619048	0.540241	0.666667
Colombian	chr1:212649295-212811057	212774757	rs4951625	0.642857	0.526157	0.642857	ATF3	ENSG00000162772	Mongola	0.2	0.305556	0.4
Colombian	chr1:212649295-212811057	212774757	rs4951625	0.642857	0.526157	0.642857	ATF3	ENSG00000162772	Naxi	0.222222	0.45873	0.5
Colombian	chr1:212649295-212811057	212774757	rs4951625	0.642857	0.526157	0.642857	ATF3	ENSG00000162772	PEL	0.447059	0.421541	0.511765
Colombian	chr1:212649295-212811057	212774757	rs4951625	0.642857	0.526157	0.642857	ATF3	ENSG00000162772	Pima	0.392857	0.349207	0.571429
Colombian	chr1:212649295-212811057	212774757	rs4951625	0.642857	0.526157	0.642857	ATF3	ENSG00000162772	Surui	0.75	0.75	0.75
Colombian	chr1:212649295-212811057	212774757	rs4951625	0.642857	0.526157	0.642857	ATF3	ENSG00000162772	Yakut	0.24	0.272857	0.3
Colombian	chr1:212649295-212811057	212775529	rs12564392	0.642857	0.526157	0.642857	ATF3	ENSG00000162772	Karitiana	0.458333	0.328767	0.541667
Colombian	chr1:212649295-212811057	212775529	rs12564392	0.642857	0.526157	0.642857	ATF3	ENSG00000162772	MXL	0.25	0.245811	0.28125
Colombian	chr1:212649295-212811057	212775529	rs12564392	0.642857	0.526157	0.642857	ATF3	ENSG00000162772	Maya	0.619048	0.540241	0.666667
Colombian	chr1:212649295-212811057	212775529	rs12564392	0.642857	0.526157	0.642857	ATF3	ENSG00000162772	Mongola	0.2	0.305556	0.4
Colombian	chr1:212649295-212811057	212775529	rs12564392	0.642857	0.526157	0.642857	ATF3	ENSG00000162772	Naxi	0.222222	0.45873	0.5
Colombian	chr1:212649295-212811057	212775529	rs12564392	0.642857	0.526157	0.642857	ATF3	ENSG00000162772	PEL	0.447059	0.421541	0.511765
Colombian	chr1:212649295-212811057	212775529	rs12564392	0.642857	0.526157	0.642857	ATF3	ENSG00000162772	Pima	0.392857	0.349207	0.571429
Colombian	chr1:212649295-212811057	212775529	rs12564392	0.642857	0.526157	0.642857	ATF3	ENSG00000162772	Surui	0.75	0.75	0.75
Colombian	chr1:212649295-212811057	212775529	rs12564392	0.642857	0.526157	0.642857	ATF3	ENSG00000162772	Yakut	0.24	0.272857	0.3
Colombian	chr1:212649295-212811057	212785414	rs11571530	0.642857	0.526157	0.642857	ATF3	ENSG00000162772	Karitiana	0.458333	0.328767	0.541667
Colombian	chr1:212649295-212811057	212785414	rs11571530	0.642857	0.526157	0.642857	ATF3	ENSG00000162772	MXL	0.25	0.245811	0.28125
Colombian	chr1:212649295-212811057	212785414	rs11571530	0.642857	0.526157	0.642857	ATF3	ENSG00000162772	Maya	0.619048	0.540241	0.666667
Colombian	chr1:212649295-212811057	212785414	rs11571530	0.642857	0.526157	0.642857	ATF3	ENSG00000162772	Mongola	0.2	0.305556	0.4
Colombian	chr1:212649295-212811057	212785414	rs11571530	0.642857	0.526157	0.642857	ATF3	ENSG00000162772	Naxi	0.222222	0.45873	0.5
Colombian	chr1:212649295-212811057	212785414	rs11571530	0.642857	0.526157	0.642857	ATF3	ENSG00000162772	PEL	0.452941	0.421541	0.511765
Colombian	chr1:212649295-212811057	212785414	rs11571530	0.642857	0.526157	0.642857	ATF3	ENSG00000162772	Pima	0.464286	0.349207	0.571429
Colombian	chr1:212649295-212811057	212785414	rs11571530	0.642857	0.526157	0.642857	ATF3	ENSG00000162772	Surui	0.75	0.75	0.75
Colombian	chr1:212649295-212811057	212785414	rs11571530	0.642857	0.526157	0.642857	ATF3	ENSG00000162772	Yakut	0.24	0.272857	0.3
Colombian	chr1:212649295-212811057	212788567	rs2229346	0.642857	0.526157	0.642857	ATF3	ENSG00000162772	Karitiana	0.458333	0.328767	0.541667
Colombian	chr1:212649295-212811057	212788567	rs2229346	0.642857	0.526157	0.642857	ATF3	ENSG00000162772	MXL	0.25	0.245811	0.28125
Colombian	chr1:212649295-212811057	212788567	rs2229346	0.642857	0.526157	0.642857	ATF3	ENSG00000162772	Maya	0.619048	0.540241	0.666667
Colombian	chr1:212649295-212811057	212788567	rs2229346	0.642857	0.526157	0.642857	ATF3	ENSG00000162772	Mongola	0.2	0.305556	0.4
Colombian	chr1:212649295-212811057	212788567	rs2229346	0.642857	0.526157	0.642857	ATF3	ENSG00000162772	Naxi	0.222222	0.45873	0.5
Colombian	chr1:212649295-212811057	212788567	rs2229346	0.642857	0.526157	0.642857	ATF3	ENSG00000162772	PEL	0.447059	0.421541	0.511765
Colombian	chr1:212649295-212811057	212788567	rs2229346	0.642857	0.526157	0.642857	ATF3	ENSG00000162772	Pima	0.464286	0.349207	0.571429
Colombian	chr1:212649295-212811057	212788567	rs2229346	0.642857	0.526157	0.642857	ATF3	ENSG00000162772	Surui	0.75	0.75	0.75
Colombian	chr1:212649295-212811057	212788567	rs2229346	0.642857	0.526157	0.642857	ATF3	ENSG00000162772	Yakut	0.24	0.272857	0.3
Maya	chr1:212649295-212811057	212774757	rs4951625	0.619048	0.540241	0.666667	ATF3	ENSG00000162772	Colombian	0.642857	0.526157	0.642857
Maya	chr1:212649295-212811057	212774757	rs4951625	0.619048	0.540241	0.666667	ATF3	ENSG00000162772	Karitiana	0.458333	0.328767	0.541667
Maya	chr1:212649295-212811057	212774757	rs4951625	0.619048	0.540241	0.666667	ATF3	ENSG00000162772	MXL	0.25	0.245811	0.28125
Maya	chr1:212649295-212811057	212774757	rs4951625	0.619048	0.540241	0.666667	ATF3	ENSG00000162772	Mongola	0.2	0.305556	0.4
Maya	chr1:212649295-212811057	212774757	rs4951625	0.619048	0.540241	0.666667	ATF3	ENSG00000162772	Naxi	0.222222	0.45873	0.5
Maya	chr1:212649295-212811057	212774757	rs4951625	0.619048	0.540241	0.666667	ATF3	ENSG00000162772	PEL	0.447059	0.421541	0.511765
Maya	chr1:212649295-212811057	212774757	rs4951625	0.619048	0.540241	0.666667	ATF3	ENSG00000162772	Pima	0.392857	0.349207	0.571429
Maya	chr1:212649295-212811057	212774757	rs4951625	0.619048	0.540241	0.666667	ATF3	ENSG00000162772	Surui	0.75	0.75	0.75
Maya	chr1:212649295-212811057	212774757	rs4951625	0.619048	0.540241	0.666667	ATF3	ENSG00000162772	Yakut	0.24	0.272857	0.3
Maya	chr1:212649295-212811057	212775529	rs12564392	0.619048	0.540241	0.666667	ATF3	ENSG00000162772	Colombian	0.642857	0.526157	0.642857
Maya	chr1:212649295-212811057	212775529	rs12564392	0.619048	0.540241	0.666667	ATF3	ENSG00000162772	Karitiana	0.458333	0.328767	0.541667
Maya	chr1:212649295-212811057	212775529	rs12564392	0.619048	0.540241	0.666667	ATF3	ENSG00000162772	MXL	0.25	0.245811	0.28125
Maya	chr1:212649295-212811057	212775529	rs12564392	0.619048	0.540241	0.666667	ATF3	ENSG00000162772	Mongola	0.2	0.305556	0.4
Maya	chr1:212649295-212811057	212775529	rs12564392	0.619048	0.540241	0.666667	ATF3	ENSG00000162772	Naxi	0.222222	0.45873	0.5
Maya	chr1:212649295-212811057	212775529	rs12564392	0.619048	0.540241	0.666667	ATF3	ENSG00000162772	PEL	0.447059	0.421541	0.511765
Maya	chr1:212649295-212811057	212775529	rs12564392	0.619048	0.540241	0.666667	ATF3	ENSG00000162772	Pima	0.392857	0.349207	0.571429
Maya	chr1:212649295-212811057	212775529	rs12564392	0.619048	0.540241	0.666667	ATF3	ENSG00000162772	Surui	0.75	0.75	0.75
Maya	chr1:212649295-212811057	212775529	rs12564392	0.619048	0.540241	0.666667	ATF3	ENSG00000162772	Yakut	0.24	0.272857	0.3
Maya	chr1:212649295-212811057	212785414	rs11571530	0.619048	0.540241	0.666667	ATF3	ENSG00000162772	Colombian	0.642857	0.526157	0.642857
Maya	chr1:212649295-212811057	212785414	rs11571530	0.619048	0.540241	0.666667	ATF3	ENSG00000162772	Karitiana	0.458333	0.328767	0.541667
Maya	chr1:212649295-212811057	212785414	rs11571530	0.619048	0.540241	0.666667	ATF3	ENSG00000162772	MXL	0.25	0.245811	0.28125
Maya	chr1:212649295-212811057	212785414	rs11571530	0.619048	0.540241	0.666667	ATF3	ENSG00000162772	Mongola	0.2	0.305556	0.4
Maya	chr1:212649295-212811057	212785414	rs11571530	0.619048	0.540241	0.666667	ATF3	ENSG00000162772	Naxi	0.222222	0.45873	0.5
Maya	chr1:212649295-212811057	212785414	rs11571530	0.619048	0.540241	0.666667	ATF3	ENSG00000162772	PEL	0.452941	0.421541	0.511765
Maya	chr1:212649295-212811057	212785414	rs11571530	0.619048	0.540241	0.666667	ATF3	ENSG00000162772	Pima	0.464286	0.349207	0.571429
Maya	chr1:212649295-212811057	212785414	rs11571530	0.619048	0.540241	0.666667	ATF3	ENSG00000162772	Surui	0.75	0.75	0.75
Maya	chr1:212649295-212811057	212785414	rs11571530	0.619048	0.540241	0.666667	ATF3	ENSG00000162772	Yakut	0.24	0.272857	0.3
Maya	chr1:212649295-212811057	212788567	rs2229346	0.619048	0.540241	0.666667	ATF3	ENSG00000162772	Colombian	0.642857	0.526157	0.642857
Maya	chr1:212649295-212811057	212788567	rs2229346	0.619048	0.540241	0.666667	ATF3	ENSG00000162772	Karitiana	0.458333	0.328767	0.541667
Maya	chr1:212649295-212811057	212788567	rs2229346	0.619048	0.540241	0.666667	ATF3	ENSG00000162772	MXL	0.25	0.245811	0.28125
Maya	chr1:212649295-212811057	212788567	rs2229346	0.619048	0.540241	0.666667	ATF3	ENSG00000162772	Mongola	0.2	0.305556	0.4
Maya	chr1:212649295-212811057	212788567	rs2229346	0.619048	0.540241	0.666667	ATF3	ENSG00000162772	Naxi	0.222222	0.45873	0.5
Maya	chr1:212649295-212811057	212788567	rs2229346	0.619048	0.540241	0.666667	ATF3	ENSG00000162772	PEL	0.447059	0.421541	0.511765
Maya	chr1:212649295-212811057	212788567	rs2229346	0.619048	0.540241	0.666667	ATF3	ENSG00000162772	Pima	0.464286	0.349207	0.571429
Maya	chr1:212649295-212811057	212788567	rs2229346	0.619048	0.540241	0.666667	ATF3	ENSG00000162772	Surui	0.75	0.75	0.75
Maya	chr1:212649295-212811057	212788567	rs2229346	0.619048	0.540241	0.666667	ATF3	ENSG00000162772	Yakut	0.24	0.272857	0.3
Pima	chr1:212649295-212811057	212758392	rs4951618	0.571429	0.349207	0.571429	ATF3	ENSG00000162772	CHB	0.354369	0.111005	0.446602
Pima	chr1:212649295-212811057	212758392	rs4951618	0.571429	0.349207	0.571429	ATF3	ENSG00000162772	CHS	0.380952	0.36853	0.428571
Pima	chr1:212649295-212811057	212758392	rs4951618	0.571429	0.349207	0.571429	ATF3	ENSG00000162772	Cambodian	0.3	0.276562	0.35
Pima	chr1:212649295-212811057	212758392	rs4951618	0.571429	0.349207	0.571429	ATF3	ENSG00000162772	Colombian	0.5	0.526157	0.642857
Pima	chr1:212649295-212811057	212758392	rs4951618	0.571429	0.349207	0.571429	ATF3	ENSG00000162772	Dai	0.277778	0.186806	0.277778
Pima	chr1:212649295-212811057	212758392	rs4951618	0.571429	0.349207	0.571429	ATF3	ENSG00000162772	Daur	0.444444	0.317938	0.444444
Pima	chr1:212649295-212811057	212758392	rs4951618	0.571429	0.349207	0.571429	ATF3	ENSG00000162772	Hezhen	0.277778	0.258454	0.388889
Pima	chr1:212649295-212811057	212758392	rs4951618	0.571429	0.349207	0.571429	ATF3	ENSG00000162772	JPT	0.254902	0.225703	0.284314
Pima	chr1:212649295-212811057	212758392	rs4951618	0.571429	0.349207	0.571429	ATF3	ENSG00000162772	Japanese	0.285714	0.233705	0.357143
Pima	chr1:212649295-212811057	212758392	rs4951618	0.571429	0.349207	0.571429	ATF3	ENSG00000162772	KHV	0.287879	0.284731	0.328283
Pima	chr1:212649295-212811057	212758392	rs4951618	0.571429	0.349207	0.571429	ATF3	ENSG00000162772	Karitiana	0.541667	0.328767	0.541667
Pima	chr1:212649295-212811057	212758392	rs4951618	0.571429	0.349207	0.571429	ATF3	ENSG00000162772	MXL	0.273438	0.245811	0.28125
Pima	chr1:212649295-212811057	212758392	rs4951618	0.571429	0.349207	0.571429	ATF3	ENSG00000162772	Maya	0.571429	0.540241	0.666667
Pima	chr1:212649295-212811057	212758392	rs4951618	0.571429	0.349207	0.571429	ATF3	ENSG00000162772	Miao	0.35	0.407627	0.45
Pima	chr1:212649295-212811057	212758392	rs4951618	0.571429	0.349207	0.571429	ATF3	ENSG00000162772	Mongola	0.35	0.305556	0.4
Pima	chr1:212649295-212811057	212758392	rs4951618	0.571429	0.349207	0.571429	ATF3	ENSG00000162772	Naxi	0.5	0.45873	0.5
Pima	chr1:212649295-212811057	212758392	rs4951618	0.571429	0.349207	0.571429	ATF3	ENSG00000162772	PEL	0.405882	0.421541	0.511765
Pima	chr1:212649295-212811057	212758392	rs4951618	0.571429	0.349207	0.571429	ATF3	ENSG00000162772	PUR	0.225962	0.169384	0.225962
Pima	chr1:212649295-212811057	212758392	rs4951618	0.571429	0.349207	0.571429	ATF3	ENSG00000162772	Surui	0.75	0.75	0.75
Pima	chr1:212649295-212811057	212758392	rs4951618	0.571429	0.349207	0.571429	ATF3	ENSG00000162772	Tu	0.3125	0.200868	0.375
Pima	chr1:212649295-212811057	212758392	rs4951618	0.571429	0.349207	0.571429	ATF3	ENSG00000162772	Xibo	0.222222	0.0918274	0.333333
Pima	chr1:212649295-212811057	212758392	rs4951618	0.571429	0.349207	0.571429	ATF3	ENSG00000162772	Yakut	0.26	0.272857	0.3
Maya	chr1:212649295-212811057	212758392	rs4951618	0.571429	0.540241	0.666667	ATF3	ENSG00000162772	CHB	0.354369	0.111005	0.446602
Maya	chr1:212649295-212811057	212758392	rs4951618	0.571429	0.540241	0.666667	ATF3	ENSG00000162772	CHS	0.380952	0.36853	0.428571
Maya	chr1:212649295-212811057	212758392	rs4951618	0.571429	0.540241	0.666667	ATF3	ENSG00000162772	Cambodian	0.3	0.276562	0.35
Maya	chr1:212649295-212811057	212758392	rs4951618	0.571429	0.540241	0.666667	ATF3	ENSG00000162772	Colombian	0.5	0.526157	0.642857
Maya	chr1:212649295-212811057	212758392	rs4951618	0.571429	0.540241	0.666667	ATF3	ENSG00000162772	Dai	0.277778	0.186806	0.277778
Maya	chr1:212649295-212811057	212758392	rs4951618	0.571429	0.540241	0.666667	ATF3	ENSG00000162772	Daur	0.444444	0.317938	0.444444
Maya	chr1:212649295-212811057	212758392	rs4951618	0.571429	0.540241	0.666667	ATF3	ENSG00000162772	Hezhen	0.277778	0.258454	0.388889
Maya	chr1:212649295-212811057	212758392	rs4951618	0.571429	0.540241	0.666667	ATF3	ENSG00000162772	JPT	0.254902	0.225703	0.284314
Maya	chr1:212649295-212811057	212758392	rs4951618	0.571429	0.540241	0.666667	ATF3	ENSG00000162772	Japanese	0.285714	0.233705	0.357143
Maya	chr1:212649295-212811057	212758392	rs4951618	0.571429	0.540241	0.666667	ATF3	ENSG00000162772	KHV	0.287879	0.284731	0.328283
Maya	chr1:212649295-212811057	212758392	rs4951618	0.571429	0.540241	0.666667	ATF3	ENSG00000162772	Karitiana	0.541667	0.328767	0.541667
Maya	chr1:212649295-212811057	212758392	rs4951618	0.571429	0.540241	0.666667	ATF3	ENSG00000162772	MXL	0.273438	0.245811	0.28125
Maya	chr1:212649295-212811057	212758392	rs4951618	0.571429	0.540241	0.666667	ATF3	ENSG00000162772	Miao	0.35	0.407627	0.45
Maya	chr1:212649295-212811057	212758392	rs4951618	0.571429	0.540241	0.666667	ATF3	ENSG00000162772	Mongola	0.35	0.305556	0.4
Maya	chr1:212649295-212811057	212758392	rs4951618	0.571429	0.540241	0.666667	ATF3	ENSG00000162772	Naxi	0.5	0.45873	0.5
Maya	chr1:212649295-212811057	212758392	rs4951618	0.571429	0.540241	0.666667	ATF3	ENSG00000162772	PEL	0.405882	0.421541	0.511765
Maya	chr1:212649295-212811057	212758392	rs4951618	0.571429	0.540241	0.666667	ATF3	ENSG00000162772	PUR	0.225962	0.169384	0.225962
Maya	chr1:212649295-212811057	212758392	rs4951618	0.571429	0.540241	0.666667	ATF3	ENSG00000162772	Pima	0.571429	0.349207	0.571429
Maya	chr1:212649295-212811057	212758392	rs4951618	0.571429	0.540241	0.666667	ATF3	ENSG00000162772	Surui	0.75	0.75	0.75
Maya	chr1:212649295-212811057	212758392	rs4951618	0.571429	0.540241	0.666667	ATF3	ENSG00000162772	Tu	0.3125	0.200868	0.375
Maya	chr1:212649295-212811057	212758392	rs4951618	0.571429	0.540241	0.666667	ATF3	ENSG00000162772	Xibo	0.222222	0.0918274	0.333333
Maya	chr1:212649295-212811057	212758392	rs4951618	0.571429	0.540241	0.666667	ATF3	ENSG00000162772	Yakut	0.26	0.272857	0.3
Maya	chr1:212649295-212811057	212758604	rs1105899	0.571429	0.540241	0.666667	ATF3	ENSG00000162772	CHB	0.354369	0.111005	0.446602
Maya	chr1:212649295-212811057	212758604	rs1105899	0.571429	0.540241	0.666667	ATF3	ENSG00000162772	CHS	0.395238	0.36853	0.428571
Maya	chr1:212649295-212811057	212758604	rs1105899	0.571429	0.540241	0.666667	ATF3	ENSG00000162772	Colombian	0.5	0.526157	0.642857
Maya	chr1:212649295-212811057	212758604	rs1105899	0.571429	0.540241	0.666667	ATF3	ENSG00000162772	Dai	0.277778	0.186806	0.277778
Maya	chr1:212649295-212811057	212758604	rs1105899	0.571429	0.540241	0.666667	ATF3	ENSG00000162772	Daur	0.388889	0.317938	0.444444
Maya	chr1:212649295-212811057	212758604	rs1105899	0.571429	0.540241	0.666667	ATF3	ENSG00000162772	JPT	0.264706	0.225703	0.284314
Maya	chr1:212649295-212811057	212758604	rs1105899	0.571429	0.540241	0.666667	ATF3	ENSG00000162772	Japanese	0.339286	0.233705	0.357143
Maya	chr1:212649295-212811057	212758604	rs1105899	0.571429	0.540241	0.666667	ATF3	ENSG00000162772	KHV	0.277778	0.284731	0.328283
Maya	chr1:212649295-212811057	212758604	rs1105899	0.571429	0.540241	0.666667	ATF3	ENSG00000162772	Karitiana	0.541667	0.328767	0.541667
Maya	chr1:212649295-212811057	212758604	rs1105899	0.571429	0.540241	0.666667	ATF3	ENSG00000162772	Miao	0.35	0.407627	0.45
Maya	chr1:212649295-212811057	212758604	rs1105899	0.571429	0.540241	0.666667	ATF3	ENSG00000162772	Mongola	0.35	0.305556	0.4
Maya	chr1:212649295-212811057	212758604	rs1105899	0.571429	0.540241	0.666667	ATF3	ENSG00000162772	Naxi	0.5	0.45873	0.5
Maya	chr1:212649295-212811057	212758604	rs1105899	0.571429	0.540241	0.666667	ATF3	ENSG00000162772	PEL	0.394118	0.421541	0.511765
Maya	chr1:212649295-212811057	212758604	rs1105899	0.571429	0.540241	0.666667	ATF3	ENSG00000162772	Pima	0.5	0.349207	0.571429
Maya	chr1:212649295-212811057	212758604	rs1105899	0.571429	0.540241	0.666667	ATF3	ENSG00000162772	Surui	0.75	0.75	0.75
Maya	chr1:212649295-212811057	212758604	rs1105899	0.571429	0.540241	0.666667	ATF3	ENSG00000162772	Tu	0.25	0.200868	0.375
Maya	chr1:212649295-212811057	212758604	rs1105899	0.571429	0.540241	0.666667	ATF3	ENSG00000162772	Xibo	0.222222	0.0918274	0.333333
Maya	chr1:212649295-212811057	212758604	rs1105899	0.571429	0.540241	0.666667	ATF3	ENSG00000162772	Yakut	0.26	0.272857	0.3
Maya	chr1:212649295-212811057	212759493	rs6674072	0.571429	0.540241	0.666667	ATF3	ENSG00000162772	CHB	0.334951	0.111005	0.446602
Maya	chr1:212649295-212811057	212759493	rs6674072	0.571429	0.540241	0.666667	ATF3	ENSG00000162772	CHS	0.371429	0.36853	0.428571
Maya	chr1:212649295-212811057	212759493	rs6674072	0.571429	0.540241	0.666667	ATF3	ENSG00000162772	Cambodian	0.25	0.276562	0.35
Maya	chr1:212649295-212811057	212759493	rs6674072	0.571429	0.540241	0.666667	ATF3	ENSG00000162772	Colombian	0.5	0.526157	0.642857
Maya	chr1:212649295-212811057	212759493	rs6674072	0.571429	0.540241	0.666667	ATF3	ENSG00000162772	Dai	0.277778	0.186806	0.277778
Maya	chr1:212649295-212811057	212759493	rs6674072	0.571429	0.540241	0.666667	ATF3	ENSG00000162772	Daur	0.444444	0.317938	0.444444
Maya	chr1:212649295-212811057	212759493	rs6674072	0.571429	0.540241	0.666667	ATF3	ENSG00000162772	Hezhen	0.277778	0.258454	0.388889
Maya	chr1:212649295-212811057	212759493	rs6674072	0.571429	0.540241	0.666667	ATF3	ENSG00000162772	JPT	0.254902	0.225703	0.284314
Maya	chr1:212649295-212811057	212759493	rs6674072	0.571429	0.540241	0.666667	ATF3	ENSG00000162772	Japanese	0.303571	0.233705	0.357143
Maya	chr1:212649295-212811057	212759493	rs6674072	0.571429	0.540241	0.666667	ATF3	ENSG00000162772	KHV	0.277778	0.284731	0.328283
Maya	chr1:212649295-212811057	212759493	rs6674072	0.571429	0.540241	0.666667	ATF3	ENSG00000162772	Karitiana	0.541667	0.328767	0.541667
Maya	chr1:212649295-212811057	212759493	rs6674072	0.571429	0.540241	0.666667	ATF3	ENSG00000162772	MXL	0.273438	0.245811	0.28125
Maya	chr1:212649295-212811057	212759493	rs6674072	0.571429	0.540241	0.666667	ATF3	ENSG00000162772	Miao	0.35	0.407627	0.45
Maya	chr1:212649295-212811057	212759493	rs6674072	0.571429	0.540241	0.666667	ATF3	ENSG00000162772	Mongola	0.35	0.305556	0.4
Maya	chr1:212649295-212811057	212759493	rs6674072	0.571429	0.540241	0.666667	ATF3	ENSG00000162772	Naxi	0.5	0.45873	0.5
Maya	chr1:212649295-212811057	212759493	rs6674072	0.571429	0.540241	0.666667	ATF3	ENSG00000162772	PEL	0.405882	0.421541	0.511765
Maya	chr1:212649295-212811057	212759493	rs6674072	0.571429	0.540241	0.666667	ATF3	ENSG00000162772	Pima	0.464286	0.349207	0.571429
Maya	chr1:212649295-212811057	212759493	rs6674072	0.571429	0.540241	0.666667	ATF3	ENSG00000162772	Surui	0.75	0.75	0.75
Maya	chr1:212649295-212811057	212759493	rs6674072	0.571429	0.540241	0.666667	ATF3	ENSG00000162772	Tu	0.25	0.200868	0.375
Maya	chr1:212649295-212811057	212759493	rs6674072	0.571429	0.540241	0.666667	ATF3	ENSG00000162772	Xibo	0.277778	0.0918274	0.333333
Maya	chr1:212649295-212811057	212759493	rs6674072	0.571429	0.540241	0.666667	ATF3	ENSG00000162772	Yakut	0.28	0.272857	0.3
Karitiana	chr1:212649295-212811057	212758392	rs4951618	0.541667	0.328767	0.541667	ATF3	ENSG00000162772	CHB	0.354369	0.111005	0.446602
Karitiana	chr1:212649295-212811057	212758392	rs4951618	0.541667	0.328767	0.541667	ATF3	ENSG00000162772	CHS	0.380952	0.36853	0.428571
Karitiana	chr1:212649295-212811057	212758392	rs4951618	0.541667	0.328767	0.541667	ATF3	ENSG00000162772	Cambodian	0.3	0.276562	0.35
Karitiana	chr1:212649295-212811057	212758392	rs4951618	0.541667	0.328767	0.541667	ATF3	ENSG00000162772	Colombian	0.5	0.526157	0.642857
Karitiana	chr1:212649295-212811057	212758392	rs4951618	0.541667	0.328767	0.541667	ATF3	ENSG00000162772	Dai	0.277778	0.186806	0.277778
Karitiana	chr1:212649295-212811057	212758392	rs4951618	0.541667	0.328767	0.541667	ATF3	ENSG00000162772	Daur	0.444444	0.317938	0.444444
Karitiana	chr1:212649295-212811057	212758392	rs4951618	0.541667	0.328767	0.541667	ATF3	ENSG00000162772	Hezhen	0.277778	0.258454	0.388889
Karitiana	chr1:212649295-212811057	212758392	rs4951618	0.541667	0.328767	0.541667	ATF3	ENSG00000162772	JPT	0.254902	0.225703	0.284314
Karitiana	chr1:212649295-212811057	212758392	rs4951618	0.541667	0.328767	0.541667	ATF3	ENSG00000162772	Japanese	0.285714	0.233705	0.357143
Karitiana	chr1:212649295-212811057	212758392	rs4951618	0.541667	0.328767	0.541667	ATF3	ENSG00000162772	KHV	0.287879	0.284731	0.328283
Karitiana	chr1:212649295-212811057	212758392	rs4951618	0.541667	0.328767	0.541667	ATF3	ENSG00000162772	MXL	0.273438	0.245811	0.28125
Karitiana	chr1:212649295-212811057	212758392	rs4951618	0.541667	0.328767	0.541667	ATF3	ENSG00000162772	Maya	0.571429	0.540241	0.666667
Karitiana	chr1:212649295-212811057	212758392	rs4951618	0.541667	0.328767	0.541667	ATF3	ENSG00000162772	Miao	0.35	0.407627	0.45
Karitiana	chr1:212649295-212811057	212758392	rs4951618	0.541667	0.328767	0.541667	ATF3	ENSG00000162772	Mongola	0.35	0.305556	0.4
Karitiana	chr1:212649295-212811057	212758392	rs4951618	0.541667	0.328767	0.541667	ATF3	ENSG00000162772	Naxi	0.5	0.45873	0.5
Karitiana	chr1:212649295-212811057	212758392	rs4951618	0.541667	0.328767	0.541667	ATF3	ENSG00000162772	PEL	0.405882	0.421541	0.511765
Karitiana	chr1:212649295-212811057	212758392	rs4951618	0.541667	0.328767	0.541667	ATF3	ENSG00000162772	PUR	0.225962	0.169384	0.225962
Karitiana	chr1:212649295-212811057	212758392	rs4951618	0.541667	0.328767	0.541667	ATF3	ENSG00000162772	Pima	0.571429	0.349207	0.571429
Karitiana	chr1:212649295-212811057	212758392	rs4951618	0.541667	0.328767	0.541667	ATF3	ENSG00000162772	Surui	0.75	0.75	0.75
Karitiana	chr1:212649295-212811057	212758392	rs4951618	0.541667	0.328767	0.541667	ATF3	ENSG00000162772	Tu	0.3125	0.200868	0.375
Karitiana	chr1:212649295-212811057	212758392	rs4951618	0.541667	0.328767	0.541667	ATF3	ENSG00000162772	Xibo	0.222222	0.0918274	0.333333
Karitiana	chr1:212649295-212811057	212758392	rs4951618	0.541667	0.328767	0.541667	ATF3	ENSG00000162772	Yakut	0.26	0.272857	0.3
Karitiana	chr1:212649295-212811057	212758604	rs1105899	0.541667	0.328767	0.541667	ATF3	ENSG00000162772	CHB	0.354369	0.111005	0.446602
Karitiana	chr1:212649295-212811057	212758604	rs1105899	0.541667	0.328767	0.541667	ATF3	ENSG00000162772	CHS	0.395238	0.36853	0.428571
Karitiana	chr1:212649295-212811057	212758604	rs1105899	0.541667	0.328767	0.541667	ATF3	ENSG00000162772	Colombian	0.5	0.526157	0.642857
Karitiana	chr1:212649295-212811057	212758604	rs1105899	0.541667	0.328767	0.541667	ATF3	ENSG00000162772	Dai	0.277778	0.186806	0.277778
Karitiana	chr1:212649295-212811057	212758604	rs1105899	0.541667	0.328767	0.541667	ATF3	ENSG00000162772	Daur	0.388889	0.317938	0.444444
Karitiana	chr1:212649295-212811057	212758604	rs1105899	0.541667	0.328767	0.541667	ATF3	ENSG00000162772	JPT	0.264706	0.225703	0.284314
Karitiana	chr1:212649295-212811057	212758604	rs1105899	0.541667	0.328767	0.541667	ATF3	ENSG00000162772	Japanese	0.339286	0.233705	0.357143
Karitiana	chr1:212649295-212811057	212758604	rs1105899	0.541667	0.328767	0.541667	ATF3	ENSG00000162772	KHV	0.277778	0.284731	0.328283
Karitiana	chr1:212649295-212811057	212758604	rs1105899	0.541667	0.328767	0.541667	ATF3	ENSG00000162772	Maya	0.571429	0.540241	0.666667
Karitiana	chr1:212649295-212811057	212758604	rs1105899	0.541667	0.328767	0.541667	ATF3	ENSG00000162772	Miao	0.35	0.407627	0.45
Karitiana	chr1:212649295-212811057	212758604	rs1105899	0.541667	0.328767	0.541667	ATF3	ENSG00000162772	Mongola	0.35	0.305556	0.4
Karitiana	chr1:212649295-212811057	212758604	rs1105899	0.541667	0.328767	0.541667	ATF3	ENSG00000162772	Naxi	0.5	0.45873	0.5
Karitiana	chr1:212649295-212811057	212758604	rs1105899	0.541667	0.328767	0.541667	ATF3	ENSG00000162772	PEL	0.394118	0.421541	0.511765
Karitiana	chr1:212649295-212811057	212758604	rs1105899	0.541667	0.328767	0.541667	ATF3	ENSG00000162772	Pima	0.5	0.349207	0.571429
Karitiana	chr1:212649295-212811057	212758604	rs1105899	0.541667	0.328767	0.541667	ATF3	ENSG00000162772	Surui	0.75	0.75	0.75
Karitiana	chr1:212649295-212811057	212758604	rs1105899	0.541667	0.328767	0.541667	ATF3	ENSG00000162772	Tu	0.25	0.200868	0.375
Karitiana	chr1:212649295-212811057	212758604	rs1105899	0.541667	0.328767	0.541667	ATF3	ENSG00000162772	Xibo	0.222222	0.0918274	0.333333
Karitiana	chr1:212649295-212811057	212758604	rs1105899	0.541667	0.328767	0.541667	ATF3	ENSG00000162772	Yakut	0.26	0.272857	0.3
Karitiana	chr1:212649295-212811057	212759493	rs6674072	0.541667	0.328767	0.541667	ATF3	ENSG00000162772	CHB	0.334951	0.111005	0.446602
Karitiana	chr1:212649295-212811057	212759493	rs6674072	0.541667	0.328767	0.541667	ATF3	ENSG00000162772	CHS	0.371429	0.36853	0.428571
Karitiana	chr1:212649295-212811057	212759493	rs6674072	0.541667	0.328767	0.541667	ATF3	ENSG00000162772	Cambodian	0.25	0.276562	0.35
Karitiana	chr1:212649295-212811057	212759493	rs6674072	0.541667	0.328767	0.541667	ATF3	ENSG00000162772	Colombian	0.5	0.526157	0.642857
Karitiana	chr1:212649295-212811057	212759493	rs6674072	0.541667	0.328767	0.541667	ATF3	ENSG00000162772	Dai	0.277778	0.186806	0.277778
Karitiana	chr1:212649295-212811057	212759493	rs6674072	0.541667	0.328767	0.541667	ATF3	ENSG00000162772	Daur	0.444444	0.317938	0.444444
Karitiana	chr1:212649295-212811057	212759493	rs6674072	0.541667	0.328767	0.541667	ATF3	ENSG00000162772	Hezhen	0.277778	0.258454	0.388889
Karitiana	chr1:212649295-212811057	212759493	rs6674072	0.541667	0.328767	0.541667	ATF3	ENSG00000162772	JPT	0.254902	0.225703	0.284314
Karitiana	chr1:212649295-212811057	212759493	rs6674072	0.541667	0.328767	0.541667	ATF3	ENSG00000162772	Japanese	0.303571	0.233705	0.357143
Karitiana	chr1:212649295-212811057	212759493	rs6674072	0.541667	0.328767	0.541667	ATF3	ENSG00000162772	KHV	0.277778	0.284731	0.328283
Karitiana	chr1:212649295-212811057	212759493	rs6674072	0.541667	0.328767	0.541667	ATF3	ENSG00000162772	MXL	0.273438	0.245811	0.28125
Karitiana	chr1:212649295-212811057	212759493	rs6674072	0.541667	0.328767	0.541667	ATF3	ENSG00000162772	Maya	0.571429	0.540241	0.666667
Karitiana	chr1:212649295-212811057	212759493	rs6674072	0.541667	0.328767	0.541667	ATF3	ENSG00000162772	Miao	0.35	0.407627	0.45
Karitiana	chr1:212649295-212811057	212759493	rs6674072	0.541667	0.328767	0.541667	ATF3	ENSG00000162772	Mongola	0.35	0.305556	0.4
Karitiana	chr1:212649295-212811057	212759493	rs6674072	0.541667	0.328767	0.541667	ATF3	ENSG00000162772	Naxi	0.5	0.45873	0.5
Karitiana	chr1:212649295-212811057	212759493	rs6674072	0.541667	0.328767	0.541667	ATF3	ENSG00000162772	PEL	0.405882	0.421541	0.511765
Karitiana	chr1:212649295-212811057	212759493	rs6674072	0.541667	0.328767	0.541667	ATF3	ENSG00000162772	Pima	0.464286	0.349207	0.571429
Karitiana	chr1:212649295-212811057	212759493	rs6674072	0.541667	0.328767	0.541667	ATF3	ENSG00000162772	Surui	0.75	0.75	0.75
Karitiana	chr1:212649295-212811057	212759493	rs6674072	0.541667	0.328767	0.541667	ATF3	ENSG00000162772	Tu	0.25	0.200868	0.375
Karitiana	chr1:212649295-212811057	212759493	rs6674072	0.541667	0.328767	0.541667	ATF3	ENSG00000162772	Xibo	0.277778	0.0918274	0.333333
Karitiana	chr1:212649295-212811057	212759493	rs6674072	0.541667	0.328767	0.541667	ATF3	ENSG00000162772	Yakut	0.28	0.272857	0.3
Pima	chr1:212649295-212811057	212758604	rs1105899	0.5	0.349207	0.571429	ATF3	ENSG00000162772	CHB	0.354369	0.111005	0.446602
Pima	chr1:212649295-212811057	212758604	rs1105899	0.5	0.349207	0.571429	ATF3	ENSG00000162772	CHS	0.395238	0.36853	0.428571
Pima	chr1:212649295-212811057	212758604	rs1105899	0.5	0.349207	0.571429	ATF3	ENSG00000162772	Colombian	0.5	0.526157	0.642857
Pima	chr1:212649295-212811057	212758604	rs1105899	0.5	0.349207	0.571429	ATF3	ENSG00000162772	Dai	0.277778	0.186806	0.277778
Pima	chr1:212649295-212811057	212758604	rs1105899	0.5	0.349207	0.571429	ATF3	ENSG00000162772	Daur	0.388889	0.317938	0.444444
Pima	chr1:212649295-212811057	212758604	rs1105899	0.5	0.349207	0.571429	ATF3	ENSG00000162772	JPT	0.264706	0.225703	0.284314
Pima	chr1:212649295-212811057	212758604	rs1105899	0.5	0.349207	0.571429	ATF3	ENSG00000162772	Japanese	0.339286	0.233705	0.357143
Pima	chr1:212649295-212811057	212758604	rs1105899	0.5	0.349207	0.571429	ATF3	ENSG00000162772	KHV	0.277778	0.284731	0.328283
Pima	chr1:212649295-212811057	212758604	rs1105899	0.5	0.349207	0.571429	ATF3	ENSG00000162772	Karitiana	0.541667	0.328767	0.541667
Pima	chr1:212649295-212811057	212758604	rs1105899	0.5	0.349207	0.571429	ATF3	ENSG00000162772	Maya	0.571429	0.540241	0.666667
Pima	chr1:212649295-212811057	212758604	rs1105899	0.5	0.349207	0.571429	ATF3	ENSG00000162772	Miao	0.35	0.407627	0.45
Pima	chr1:212649295-212811057	212758604	rs1105899	0.5	0.349207	0.571429	ATF3	ENSG00000162772	Mongola	0.35	0.305556	0.4
Pima	chr1:212649295-212811057	212758604	rs1105899	0.5	0.349207	0.571429	ATF3	ENSG00000162772	Naxi	0.5	0.45873	0.5
Pima	chr1:212649295-212811057	212758604	rs1105899	0.5	0.349207	0.571429	ATF3	ENSG00000162772	PEL	0.394118	0.421541	0.511765
Pima	chr1:212649295-212811057	212758604	rs1105899	0.5	0.349207	0.571429	ATF3	ENSG00000162772	Surui	0.75	0.75	0.75
Pima	chr1:212649295-212811057	212758604	rs1105899	0.5	0.349207	0.571429	ATF3	ENSG00000162772	Tu	0.25	0.200868	0.375
Pima	chr1:212649295-212811057	212758604	rs1105899	0.5	0.349207	0.571429	ATF3	ENSG00000162772	Xibo	0.222222	0.0918274	0.333333
Pima	chr1:212649295-212811057	212758604	rs1105899	0.5	0.349207	0.571429	ATF3	ENSG00000162772	Yakut	0.26	0.272857	0.3
PEL	chr1:212649295-212811057	212768599	rs1567709	0.476471	0.421541	0.511765	ATF3	ENSG00000162772	CHB	0.213592	0.111005	0.446602
PEL	chr1:212649295-212811057	212768599	rs1567709	0.476471	0.421541	0.511765	ATF3	ENSG00000162772	CHS	0.204762	0.36853	0.428571
PEL	chr1:212649295-212811057	212768599	rs1567709	0.476471	0.421541	0.511765	ATF3	ENSG00000162772	CLM	0.201087	0.186358	0.233696
PEL	chr1:212649295-212811057	212768599	rs1567709	0.476471	0.421541	0.511765	ATF3	ENSG00000162772	Colombian	0.642857	0.526157	0.642857
PEL	chr1:212649295-212811057	212768599	rs1567709	0.476471	0.421541	0.511765	ATF3	ENSG00000162772	Daur	0.222222	0.317938	0.444444
PEL	chr1:212649295-212811057	212768599	rs1567709	0.476471	0.421541	0.511765	ATF3	ENSG00000162772	Japanese	0.214286	0.233705	0.357143
PEL	chr1:212649295-212811057	212768599	rs1567709	0.476471	0.421541	0.511765	ATF3	ENSG00000162772	Karitiana	0.458333	0.328767	0.541667
PEL	chr1:212649295-212811057	212768599	rs1567709	0.476471	0.421541	0.511765	ATF3	ENSG00000162772	MXL	0.257812	0.245811	0.28125
PEL	chr1:212649295-212811057	212768599	rs1567709	0.476471	0.421541	0.511765	ATF3	ENSG00000162772	Maya	0.666667	0.540241	0.666667
PEL	chr1:212649295-212811057	212768599	rs1567709	0.476471	0.421541	0.511765	ATF3	ENSG00000162772	Mongola	0.25	0.305556	0.4
PEL	chr1:212649295-212811057	212768599	rs1567709	0.476471	0.421541	0.511765	ATF3	ENSG00000162772	Naxi	0.277778	0.45873	0.5
PEL	chr1:212649295-212811057	212768599	rs1567709	0.476471	0.421541	0.511765	ATF3	ENSG00000162772	Pima	0.428571	0.349207	0.571429
PEL	chr1:212649295-212811057	212768599	rs1567709	0.476471	0.421541	0.511765	ATF3	ENSG00000162772	Surui	0.75	0.75	0.75
PEL	chr1:212649295-212811057	212768599	rs1567709	0.476471	0.421541	0.511765	ATF3	ENSG00000162772	Yakut	0.28	0.272857	0.3
PEL	chr1:212649295-212811057	212769016	rs3122722	0.476471	0.421541	0.511765	ATF3	ENSG00000162772	CHB	0.218447	0.111005	0.446602
PEL	chr1:212649295-212811057	212769016	rs3122722	0.476471	0.421541	0.511765	ATF3	ENSG00000162772	CHS	0.204762	0.36853	0.428571
PEL	chr1:212649295-212811057	212769016	rs3122722	0.476471	0.421541	0.511765	ATF3	ENSG00000162772	CLM	0.201087	0.186358	0.233696
PEL	chr1:212649295-212811057	212769016	rs3122722	0.476471	0.421541	0.511765	ATF3	ENSG00000162772	Colombian	0.642857	0.526157	0.642857
PEL	chr1:212649295-212811057	212769016	rs3122722	0.476471	0.421541	0.511765	ATF3	ENSG00000162772	Daur	0.222222	0.317938	0.444444
PEL	chr1:212649295-212811057	212769016	rs3122722	0.476471	0.421541	0.511765	ATF3	ENSG00000162772	Japanese	0.214286	0.233705	0.357143
PEL	chr1:212649295-212811057	212769016	rs3122722	0.476471	0.421541	0.511765	ATF3	ENSG00000162772	Karitiana	0.458333	0.328767	0.541667
PEL	chr1:212649295-212811057	212769016	rs3122722	0.476471	0.421541	0.511765	ATF3	ENSG00000162772	MXL	0.257812	0.245811	0.28125
PEL	chr1:212649295-212811057	212769016	rs3122722	0.476471	0.421541	0.511765	ATF3	ENSG00000162772	Maya	0.666667	0.540241	0.666667
PEL	chr1:212649295-212811057	212769016	rs3122722	0.476471	0.421541	0.511765	ATF3	ENSG00000162772	Mongola	0.25	0.305556	0.4
PEL	chr1:212649295-212811057	212769016	rs3122722	0.476471	0.421541	0.511765	ATF3	ENSG00000162772	Naxi	0.277778	0.45873	0.5
PEL	chr1:212649295-212811057	212769016	rs3122722	0.476471	0.421541	0.511765	ATF3	ENSG00000162772	Pima	0.428571	0.349207	0.571429
PEL	chr1:212649295-212811057	212769016	rs3122722	0.476471	0.421541	0.511765	ATF3	ENSG00000162772	Surui	0.75	0.75	0.75
PEL	chr1:212649295-212811057	212769016	rs3122722	0.476471	0.421541	0.511765	ATF3	ENSG00000162772	Yakut	0.28	0.272857	0.3
PEL	chr1:212649295-212811057	212766199	rs1976657	0.470588	0.421541	0.511765	ATF3	ENSG00000162772	CHB	0.218447	0.111005	0.446602
PEL	chr1:212649295-212811057	212766199	rs1976657	0.470588	0.421541	0.511765	ATF3	ENSG00000162772	CHS	0.204762	0.36853	0.428571
PEL	chr1:212649295-212811057	212766199	rs1976657	0.470588	0.421541	0.511765	ATF3	ENSG00000162772	CLM	0.201087	0.186358	0.233696
PEL	chr1:212649295-212811057	212766199	rs1976657	0.470588	0.421541	0.511765	ATF3	ENSG00000162772	Colombian	0.642857	0.526157	0.642857
PEL	chr1:212649295-212811057	212766199	rs1976657	0.470588	0.421541	0.511765	ATF3	ENSG00000162772	Daur	0.222222	0.317938	0.444444
PEL	chr1:212649295-212811057	212766199	rs1976657	0.470588	0.421541	0.511765	ATF3	ENSG00000162772	Japanese	0.214286	0.233705	0.357143
PEL	chr1:212649295-212811057	212766199	rs1976657	0.470588	0.421541	0.511765	ATF3	ENSG00000162772	Karitiana	0.458333	0.328767	0.541667
PEL	chr1:212649295-212811057	212766199	rs1976657	0.470588	0.421541	0.511765	ATF3	ENSG00000162772	MXL	0.257812	0.245811	0.28125
PEL	chr1:212649295-212811057	212766199	rs1976657	0.470588	0.421541	0.511765	ATF3	ENSG00000162772	Maya	0.666667	0.540241	0.666667
PEL	chr1:212649295-212811057	212766199	rs1976657	0.470588	0.421541	0.511765	ATF3	ENSG00000162772	Mongola	0.25	0.305556	0.4
PEL	chr1:212649295-212811057	212766199	rs1976657	0.470588	0.421541	0.511765	ATF3	ENSG00000162772	Naxi	0.277778	0.45873	0.5
PEL	chr1:212649295-212811057	212766199	rs1976657	0.470588	0.421541	0.511765	ATF3	ENSG00000162772	Pima	0.428571	0.349207	0.571429
PEL	chr1:212649295-212811057	212766199	rs1976657	0.470588	0.421541	0.511765	ATF3	ENSG00000162772	Surui	0.75	0.75	0.75
PEL	chr1:212649295-212811057	212766199	rs1976657	0.470588	0.421541	0.511765	ATF3	ENSG00000162772	Yakut	0.28	0.272857	0.3
Karitiana	chr1:212649295-212811057	212766199	rs1976657	0.458333	0.328767	0.541667	ATF3	ENSG00000162772	CHB	0.218447	0.111005	0.446602
Karitiana	chr1:212649295-212811057	212766199	rs1976657	0.458333	0.328767	0.541667	ATF3	ENSG00000162772	CHS	0.204762	0.36853	0.428571
Karitiana	chr1:212649295-212811057	212766199	rs1976657	0.458333	0.328767	0.541667	ATF3	ENSG00000162772	CLM	0.201087	0.186358	0.233696
Karitiana	chr1:212649295-212811057	212766199	rs1976657	0.458333	0.328767	0.541667	ATF3	ENSG00000162772	Colombian	0.642857	0.526157	0.642857
Karitiana	chr1:212649295-212811057	212766199	rs1976657	0.458333	0.328767	0.541667	ATF3	ENSG00000162772	Daur	0.222222	0.317938	0.444444
Karitiana	chr1:212649295-212811057	212766199	rs1976657	0.458333	0.328767	0.541667	ATF3	ENSG00000162772	Japanese	0.214286	0.233705	0.357143
Karitiana	chr1:212649295-212811057	212766199	rs1976657	0.458333	0.328767	0.541667	ATF3	ENSG00000162772	MXL	0.257812	0.245811	0.28125
Karitiana	chr1:212649295-212811057	212766199	rs1976657	0.458333	0.328767	0.541667	ATF3	ENSG00000162772	Maya	0.666667	0.540241	0.666667
Karitiana	chr1:212649295-212811057	212766199	rs1976657	0.458333	0.328767	0.541667	ATF3	ENSG00000162772	Mongola	0.25	0.305556	0.4
Karitiana	chr1:212649295-212811057	212766199	rs1976657	0.458333	0.328767	0.541667	ATF3	ENSG00000162772	Naxi	0.277778	0.45873	0.5
Karitiana	chr1:212649295-212811057	212766199	rs1976657	0.458333	0.328767	0.541667	ATF3	ENSG00000162772	PEL	0.470588	0.421541	0.511765
Karitiana	chr1:212649295-212811057	212766199	rs1976657	0.458333	0.328767	0.541667	ATF3	ENSG00000162772	Pima	0.428571	0.349207	0.571429
Karitiana	chr1:212649295-212811057	212766199	rs1976657	0.458333	0.328767	0.541667	ATF3	ENSG00000162772	Surui	0.75	0.75	0.75
Karitiana	chr1:212649295-212811057	212766199	rs1976657	0.458333	0.328767	0.541667	ATF3	ENSG00000162772	Yakut	0.28	0.272857	0.3
Karitiana	chr1:212649295-212811057	212768599	rs1567709	0.458333	0.328767	0.541667	ATF3	ENSG00000162772	CHB	0.213592	0.111005	0.446602
Karitiana	chr1:212649295-212811057	212768599	rs1567709	0.458333	0.328767	0.541667	ATF3	ENSG00000162772	CHS	0.204762	0.36853	0.428571
Karitiana	chr1:212649295-212811057	212768599	rs1567709	0.458333	0.328767	0.541667	ATF3	ENSG00000162772	CLM	0.201087	0.186358	0.233696
Karitiana	chr1:212649295-212811057	212768599	rs1567709	0.458333	0.328767	0.541667	ATF3	ENSG00000162772	Colombian	0.642857	0.526157	0.642857
Karitiana	chr1:212649295-212811057	212768599	rs1567709	0.458333	0.328767	0.541667	ATF3	ENSG00000162772	Daur	0.222222	0.317938	0.444444
Karitiana	chr1:212649295-212811057	212768599	rs1567709	0.458333	0.328767	0.541667	ATF3	ENSG00000162772	Japanese	0.214286	0.233705	0.357143
Karitiana	chr1:212649295-212811057	212768599	rs1567709	0.458333	0.328767	0.541667	ATF3	ENSG00000162772	MXL	0.257812	0.245811	0.28125
Karitiana	chr1:212649295-212811057	212768599	rs1567709	0.458333	0.328767	0.541667	ATF3	ENSG00000162772	Maya	0.666667	0.540241	0.666667
Karitiana	chr1:212649295-212811057	212768599	rs1567709	0.458333	0.328767	0.541667	ATF3	ENSG00000162772	Mongola	0.25	0.305556	0.4
Karitiana	chr1:212649295-212811057	212768599	rs1567709	0.458333	0.328767	0.541667	ATF3	ENSG00000162772	Naxi	0.277778	0.45873	0.5
Karitiana	chr1:212649295-212811057	212768599	rs1567709	0.458333	0.328767	0.541667	ATF3	ENSG00000162772	PEL	0.476471	0.421541	0.511765
Karitiana	chr1:212649295-212811057	212768599	rs1567709	0.458333	0.328767	0.541667	ATF3	ENSG00000162772	Pima	0.428571	0.349207	0.571429
Karitiana	chr1:212649295-212811057	212768599	rs1567709	0.458333	0.328767	0.541667	ATF3	ENSG00000162772	Surui	0.75	0.75	0.75
Karitiana	chr1:212649295-212811057	212768599	rs1567709	0.458333	0.328767	0.541667	ATF3	ENSG00000162772	Yakut	0.28	0.272857	0.3
Karitiana	chr1:212649295-212811057	212769016	rs3122722	0.458333	0.328767	0.541667	ATF3	ENSG00000162772	CHB	0.218447	0.111005	0.446602
Karitiana	chr1:212649295-212811057	212769016	rs3122722	0.458333	0.328767	0.541667	ATF3	ENSG00000162772	CHS	0.204762	0.36853	0.428571
Karitiana	chr1:212649295-212811057	212769016	rs3122722	0.458333	0.328767	0.541667	ATF3	ENSG00000162772	CLM	0.201087	0.186358	0.233696
Karitiana	chr1:212649295-212811057	212769016	rs3122722	0.458333	0.328767	0.541667	ATF3	ENSG00000162772	Colombian	0.642857	0.526157	0.642857
Karitiana	chr1:212649295-212811057	212769016	rs3122722	0.458333	0.328767	0.541667	ATF3	ENSG00000162772	Daur	0.222222	0.317938	0.444444
Karitiana	chr1:212649295-212811057	212769016	rs3122722	0.458333	0.328767	0.541667	ATF3	ENSG00000162772	Japanese	0.214286	0.233705	0.357143
Karitiana	chr1:212649295-212811057	212769016	rs3122722	0.458333	0.328767	0.541667	ATF3	ENSG00000162772	MXL	0.257812	0.245811	0.28125
Karitiana	chr1:212649295-212811057	212769016	rs3122722	0.458333	0.328767	0.541667	ATF3	ENSG00000162772	Maya	0.666667	0.540241	0.666667
Karitiana	chr1:212649295-212811057	212769016	rs3122722	0.458333	0.328767	0.541667	ATF3	ENSG00000162772	Mongola	0.25	0.305556	0.4
Karitiana	chr1:212649295-212811057	212769016	rs3122722	0.458333	0.328767	0.541667	ATF3	ENSG00000162772	Naxi	0.277778	0.45873	0.5
Karitiana	chr1:212649295-212811057	212769016	rs3122722	0.458333	0.328767	0.541667	ATF3	ENSG00000162772	PEL	0.476471	0.421541	0.511765
Karitiana	chr1:212649295-212811057	212769016	rs3122722	0.458333	0.328767	0.541667	ATF3	ENSG00000162772	Pima	0.428571	0.349207	0.571429
Karitiana	chr1:212649295-212811057	212769016	rs3122722	0.458333	0.328767	0.541667	ATF3	ENSG00000162772	Surui	0.75	0.75	0.75
Karitiana	chr1:212649295-212811057	212769016	rs3122722	0.458333	0.328767	0.541667	ATF3	ENSG00000162772	Yakut	0.28	0.272857	0.3
Karitiana	chr1:212649295-212811057	212774757	rs4951625	0.458333	0.328767	0.541667	ATF3	ENSG00000162772	Colombian	0.642857	0.526157	0.642857
Karitiana	chr1:212649295-212811057	212774757	rs4951625	0.458333	0.328767	0.541667	ATF3	ENSG00000162772	MXL	0.25	0.245811	0.28125
Karitiana	chr1:212649295-212811057	212774757	rs4951625	0.458333	0.328767	0.541667	ATF3	ENSG00000162772	Maya	0.619048	0.540241	0.666667
Karitiana	chr1:212649295-212811057	212774757	rs4951625	0.458333	0.328767	0.541667	ATF3	ENSG00000162772	Mongola	0.2	0.305556	0.4
Karitiana	chr1:212649295-212811057	212774757	rs4951625	0.458333	0.328767	0.541667	ATF3	ENSG00000162772	Naxi	0.222222	0.45873	0.5
Karitiana	chr1:212649295-212811057	212774757	rs4951625	0.458333	0.328767	0.541667	ATF3	ENSG00000162772	PEL	0.447059	0.421541	0.511765
Karitiana	chr1:212649295-212811057	212774757	rs4951625	0.458333	0.328767	0.541667	ATF3	ENSG00000162772	Pima	0.392857	0.349207	0.571429
Karitiana	chr1:212649295-212811057	212774757	rs4951625	0.458333	0.328767	0.541667	ATF3	ENSG00000162772	Surui	0.75	0.75	0.75
Karitiana	chr1:212649295-212811057	212774757	rs4951625	0.458333	0.328767	0.541667	ATF3	ENSG00000162772	Yakut	0.24	0.272857	0.3
Karitiana	chr1:212649295-212811057	212775529	rs12564392	0.458333	0.328767	0.541667	ATF3	ENSG00000162772	Colombian	0.642857	0.526157	0.642857
Karitiana	chr1:212649295-212811057	212775529	rs12564392	0.458333	0.328767	0.541667	ATF3	ENSG00000162772	MXL	0.25	0.245811	0.28125
Karitiana	chr1:212649295-212811057	212775529	rs12564392	0.458333	0.328767	0.541667	ATF3	ENSG00000162772	Maya	0.619048	0.540241	0.666667
Karitiana	chr1:212649295-212811057	212775529	rs12564392	0.458333	0.328767	0.541667	ATF3	ENSG00000162772	Mongola	0.2	0.305556	0.4
Karitiana	chr1:212649295-212811057	212775529	rs12564392	0.458333	0.328767	0.541667	ATF3	ENSG00000162772	Naxi	0.222222	0.45873	0.5
Karitiana	chr1:212649295-212811057	212775529	rs12564392	0.458333	0.328767	0.541667	ATF3	ENSG00000162772	PEL	0.447059	0.421541	0.511765
Karitiana	chr1:212649295-212811057	212775529	rs12564392	0.458333	0.328767	0.541667	ATF3	ENSG00000162772	Pima	0.392857	0.349207	0.571429
Karitiana	chr1:212649295-212811057	212775529	rs12564392	0.458333	0.328767	0.541667	ATF3	ENSG00000162772	Surui	0.75	0.75	0.75
Karitiana	chr1:212649295-212811057	212775529	rs12564392	0.458333	0.328767	0.541667	ATF3	ENSG00000162772	Yakut	0.24	0.272857	0.3
Karitiana	chr1:212649295-212811057	212785414	rs11571530	0.458333	0.328767	0.541667	ATF3	ENSG00000162772	Colombian	0.642857	0.526157	0.642857
Karitiana	chr1:212649295-212811057	212785414	rs11571530	0.458333	0.328767	0.541667	ATF3	ENSG00000162772	MXL	0.25	0.245811	0.28125
Karitiana	chr1:212649295-212811057	212785414	rs11571530	0.458333	0.328767	0.541667	ATF3	ENSG00000162772	Maya	0.619048	0.540241	0.666667
Karitiana	chr1:212649295-212811057	212785414	rs11571530	0.458333	0.328767	0.541667	ATF3	ENSG00000162772	Mongola	0.2	0.305556	0.4
Karitiana	chr1:212649295-212811057	212785414	rs11571530	0.458333	0.328767	0.541667	ATF3	ENSG00000162772	Naxi	0.222222	0.45873	0.5
Karitiana	chr1:212649295-212811057	212785414	rs11571530	0.458333	0.328767	0.541667	ATF3	ENSG00000162772	PEL	0.452941	0.421541	0.511765
Karitiana	chr1:212649295-212811057	212785414	rs11571530	0.458333	0.328767	0.541667	ATF3	ENSG00000162772	Pima	0.464286	0.349207	0.571429
Karitiana	chr1:212649295-212811057	212785414	rs11571530	0.458333	0.328767	0.541667	ATF3	ENSG00000162772	Surui	0.75	0.75	0.75
Karitiana	chr1:212649295-212811057	212785414	rs11571530	0.458333	0.328767	0.541667	ATF3	ENSG00000162772	Yakut	0.24	0.272857	0.3
Karitiana	chr1:212649295-212811057	212788567	rs2229346	0.458333	0.328767	0.541667	ATF3	ENSG00000162772	Colombian	0.642857	0.526157	0.642857
Karitiana	chr1:212649295-212811057	212788567	rs2229346	0.458333	0.328767	0.541667	ATF3	ENSG00000162772	MXL	0.25	0.245811	0.28125
Karitiana	chr1:212649295-212811057	212788567	rs2229346	0.458333	0.328767	0.541667	ATF3	ENSG00000162772	Maya	0.619048	0.540241	0.666667
Karitiana	chr1:212649295-212811057	212788567	rs2229346	0.458333	0.328767	0.541667	ATF3	ENSG00000162772	Mongola	0.2	0.305556	0.4
Karitiana	chr1:212649295-212811057	212788567	rs2229346	0.458333	0.328767	0.541667	ATF3	ENSG00000162772	Naxi	0.222222	0.45873	0.5
Karitiana	chr1:212649295-212811057	212788567	rs2229346	0.458333	0.328767	0.541667	ATF3	ENSG00000162772	PEL	0.447059	0.421541	0.511765
Karitiana	chr1:212649295-212811057	212788567	rs2229346	0.458333	0.328767	0.541667	ATF3	ENSG00000162772	Pima	0.464286	0.349207	0.571429
Karitiana	chr1:212649295-212811057	212788567	rs2229346	0.458333	0.328767	0.541667	ATF3	ENSG00000162772	Surui	0.75	0.75	0.75
Karitiana	chr1:212649295-212811057	212788567	rs2229346	0.458333	0.328767	0.541667	ATF3	ENSG00000162772	Yakut	0.24	0.272857	0.3
PEL	chr1:212649295-212811057	212785414	rs11571530	0.452941	0.421541	0.511765	ATF3	ENSG00000162772	Colombian	0.642857	0.526157	0.642857
PEL	chr1:212649295-212811057	212785414	rs11571530	0.452941	0.421541	0.511765	ATF3	ENSG00000162772	Karitiana	0.458333	0.328767	0.541667
PEL	chr1:212649295-212811057	212785414	rs11571530	0.452941	0.421541	0.511765	ATF3	ENSG00000162772	MXL	0.25	0.245811	0.28125
PEL	chr1:212649295-212811057	212785414	rs11571530	0.452941	0.421541	0.511765	ATF3	ENSG00000162772	Maya	0.619048	0.540241	0.666667
PEL	chr1:212649295-212811057	212785414	rs11571530	0.452941	0.421541	0.511765	ATF3	ENSG00000162772	Mongola	0.2	0.305556	0.4
PEL	chr1:212649295-212811057	212785414	rs11571530	0.452941	0.421541	0.511765	ATF3	ENSG00000162772	Naxi	0.222222	0.45873	0.5
PEL	chr1:212649295-212811057	212785414	rs11571530	0.452941	0.421541	0.511765	ATF3	ENSG00000162772	Pima	0.464286	0.349207	0.571429
PEL	chr1:212649295-212811057	212785414	rs11571530	0.452941	0.421541	0.511765	ATF3	ENSG00000162772	Surui	0.75	0.75	0.75
PEL	chr1:212649295-212811057	212785414	rs11571530	0.452941	0.421541	0.511765	ATF3	ENSG00000162772	Yakut	0.24	0.272857	0.3
PEL	chr1:212649295-212811057	212774757	rs4951625	0.447059	0.421541	0.511765	ATF3	ENSG00000162772	Colombian	0.642857	0.526157	0.642857
PEL	chr1:212649295-212811057	212774757	rs4951625	0.447059	0.421541	0.511765	ATF3	ENSG00000162772	Karitiana	0.458333	0.328767	0.541667
PEL	chr1:212649295-212811057	212774757	rs4951625	0.447059	0.421541	0.511765	ATF3	ENSG00000162772	MXL	0.25	0.245811	0.28125
PEL	chr1:212649295-212811057	212774757	rs4951625	0.447059	0.421541	0.511765	ATF3	ENSG00000162772	Maya	0.619048	0.540241	0.666667
PEL	chr1:212649295-212811057	212774757	rs4951625	0.447059	0.421541	0.511765	ATF3	ENSG00000162772	Mongola	0.2	0.305556	0.4
PEL	chr1:212649295-212811057	212774757	rs4951625	0.447059	0.421541	0.511765	ATF3	ENSG00000162772	Naxi	0.222222	0.45873	0.5
PEL	chr1:212649295-212811057	212774757	rs4951625	0.447059	0.421541	0.511765	ATF3	ENSG00000162772	Pima	0.392857	0.349207	0.571429
PEL	chr1:212649295-212811057	212774757	rs4951625	0.447059	0.421541	0.511765	ATF3	ENSG00000162772	Surui	0.75	0.75	0.75
PEL	chr1:212649295-212811057	212774757	rs4951625	0.447059	0.421541	0.511765	ATF3	ENSG00000162772	Yakut	0.24	0.272857	0.3
PEL	chr1:212649295-212811057	212775529	rs12564392	0.447059	0.421541	0.511765	ATF3	ENSG00000162772	Colombian	0.642857	0.526157	0.642857
PEL	chr1:212649295-212811057	212775529	rs12564392	0.447059	0.421541	0.511765	ATF3	ENSG00000162772	Karitiana	0.458333	0.328767	0.541667
PEL	chr1:212649295-212811057	212775529	rs12564392	0.447059	0.421541	0.511765	ATF3	ENSG00000162772	MXL	0.25	0.245811	0.28125
PEL	chr1:212649295-212811057	212775529	rs12564392	0.447059	0.421541	0.511765	ATF3	ENSG00000162772	Maya	0.619048	0.540241	0.666667
PEL	chr1:212649295-212811057	212775529	rs12564392	0.447059	0.421541	0.511765	ATF3	ENSG00000162772	Mongola	0.2	0.305556	0.4
PEL	chr1:212649295-212811057	212775529	rs12564392	0.447059	0.421541	0.511765	ATF3	ENSG00000162772	Naxi	0.222222	0.45873	0.5
PEL	chr1:212649295-212811057	212775529	rs12564392	0.447059	0.421541	0.511765	ATF3	ENSG00000162772	Pima	0.392857	0.349207	0.571429
PEL	chr1:212649295-212811057	212775529	rs12564392	0.447059	0.421541	0.511765	ATF3	ENSG00000162772	Surui	0.75	0.75	0.75
PEL	chr1:212649295-212811057	212775529	rs12564392	0.447059	0.421541	0.511765	ATF3	ENSG00000162772	Yakut	0.24	0.272857	0.3
PEL	chr1:212649295-212811057	212788567	rs2229346	0.447059	0.421541	0.511765	ATF3	ENSG00000162772	Colombian	0.642857	0.526157	0.642857
PEL	chr1:212649295-212811057	212788567	rs2229346	0.447059	0.421541	0.511765	ATF3	ENSG00000162772	Karitiana	0.458333	0.328767	0.541667
PEL	chr1:212649295-212811057	212788567	rs2229346	0.447059	0.421541	0.511765	ATF3	ENSG00000162772	MXL	0.25	0.245811	0.28125
PEL	chr1:212649295-212811057	212788567	rs2229346	0.447059	0.421541	0.511765	ATF3	ENSG00000162772	Maya	0.619048	0.540241	0.666667
PEL	chr1:212649295-212811057	212788567	rs2229346	0.447059	0.421541	0.511765	ATF3	ENSG00000162772	Mongola	0.2	0.305556	0.4
PEL	chr1:212649295-212811057	212788567	rs2229346	0.447059	0.421541	0.511765	ATF3	ENSG00000162772	Naxi	0.222222	0.45873	0.5
PEL	chr1:212649295-212811057	212788567	rs2229346	0.447059	0.421541	0.511765	ATF3	ENSG00000162772	Pima	0.464286	0.349207	0.571429
PEL	chr1:212649295-212811057	212788567	rs2229346	0.447059	0.421541	0.511765	ATF3	ENSG00000162772	Surui	0.75	0.75	0.75
PEL	chr1:212649295-212811057	212788567	rs2229346	0.447059	0.421541	0.511765	ATF3	ENSG00000162772	Yakut	0.24	0.272857	0.3
PEL	chr1:212649295-212811057	212738835	rs3806460	0.417647	0.421541	0.511765	ENSG00000288007	ENSG00000288007	CHB	0.427184	0.111005	0.446602
PEL	chr1:212649295-212811057	212738835	rs3806460	0.417647	0.421541	0.511765	ENSG00000288007	ENSG00000288007	CHS	0.404762	0.36853	0.428571
PEL	chr1:212649295-212811057	212738835	rs3806460	0.417647	0.421541	0.511765	ENSG00000288007	ENSG00000288007	Cambodian	0.3	0.276562	0.35
PEL	chr1:212649295-212811057	212738835	rs3806460	0.417647	0.421541	0.511765	ENSG00000288007	ENSG00000288007	Colombian	0.5	0.526157	0.642857
PEL	chr1:212649295-212811057	212738835	rs3806460	0.417647	0.421541	0.511765	ENSG00000288007	ENSG00000288007	Dai	0.277778	0.186806	0.277778
PEL	chr1:212649295-212811057	212738835	rs3806460	0.417647	0.421541	0.511765	ENSG00000288007	ENSG00000288007	Daur	0.444444	0.317938	0.444444
PEL	chr1:212649295-212811057	212738835	rs3806460	0.417647	0.421541	0.511765	ENSG00000288007	ENSG00000288007	Hezhen	0.388889	0.258454	0.388889
PEL	chr1:212649295-212811057	212738835	rs3806460	0.417647	0.421541	0.511765	ENSG00000288007	ENSG00000288007	JPT	0.27451	0.225703	0.284314
PEL	chr1:212649295-212811057	212738835	rs3806460	0.417647	0.421541	0.511765	ENSG00000288007	ENSG00000288007	Japanese	0.339286	0.233705	0.357143
PEL	chr1:212649295-212811057	212738835	rs3806460	0.417647	0.421541	0.511765	ENSG00000288007	ENSG00000288007	KHV	0.30303	0.284731	0.328283
PEL	chr1:212649295-212811057	212738835	rs3806460	0.417647	0.421541	0.511765	ENSG00000288007	ENSG00000288007	Karitiana	0.416667	0.328767	0.541667
PEL	chr1:212649295-212811057	212738835	rs3806460	0.417647	0.421541	0.511765	ENSG00000288007	ENSG00000288007	MXL	0.28125	0.245811	0.28125
PEL	chr1:212649295-212811057	212738835	rs3806460	0.417647	0.421541	0.511765	ENSG00000288007	ENSG00000288007	Maya	0.547619	0.540241	0.666667
PEL	chr1:212649295-212811057	212738835	rs3806460	0.417647	0.421541	0.511765	ENSG00000288007	ENSG00000288007	Miao	0.4	0.407627	0.45
PEL	chr1:212649295-212811057	212738835	rs3806460	0.417647	0.421541	0.511765	ENSG00000288007	ENSG00000288007	Mongola	0.4	0.305556	0.4
PEL	chr1:212649295-212811057	212738835	rs3806460	0.417647	0.421541	0.511765	ENSG00000288007	ENSG00000288007	Naxi	0.5	0.45873	0.5
PEL	chr1:212649295-212811057	212738835	rs3806460	0.417647	0.421541	0.511765	ENSG00000288007	ENSG00000288007	Pima	0.464286	0.349207	0.571429
PEL	chr1:212649295-212811057	212738835	rs3806460	0.417647	0.421541	0.511765	ENSG00000288007	ENSG00000288007	Surui	0.75	0.75	0.75
PEL	chr1:212649295-212811057	212738835	rs3806460	0.417647	0.421541	0.511765	ENSG00000288007	ENSG00000288007	Tu	0.3125	0.200868	0.375
PEL	chr1:212649295-212811057	212738835	rs3806460	0.417647	0.421541	0.511765	ENSG00000288007	ENSG00000288007	Uygur	0.25	0.239943	0.25
PEL	chr1:212649295-212811057	212738835	rs3806460	0.417647	0.421541	0.511765	ENSG00000288007	ENSG00000288007	Xibo	0.277778	0.0918274	0.333333
PEL	chr1:212649295-212811057	212738835	rs3806460	0.417647	0.421541	0.511765	ENSG00000288007	ENSG00000288007	Yakut	0.26	0.272857	0.3
PEL	chr1:212649295-212811057	212741763	rs11119974	0.417647	0.421541	0.511765	ATF3	ENSG00000162772	CHB	0.427184	0.111005	0.446602
PEL	chr1:212649295-212811057	212741763	rs11119974	0.417647	0.421541	0.511765	ATF3	ENSG00000162772	CHS	0.404762	0.36853	0.428571
PEL	chr1:212649295-212811057	212741763	rs11119974	0.417647	0.421541	0.511765	ATF3	ENSG00000162772	Cambodian	0.3	0.276562	0.35
PEL	chr1:212649295-212811057	212741763	rs11119974	0.417647	0.421541	0.511765	ATF3	ENSG00000162772	Colombian	0.5	0.526157	0.642857
PEL	chr1:212649295-212811057	212741763	rs11119974	0.417647	0.421541	0.511765	ATF3	ENSG00000162772	Dai	0.277778	0.186806	0.277778
PEL	chr1:212649295-212811057	212741763	rs11119974	0.417647	0.421541	0.511765	ATF3	ENSG00000162772	Daur	0.444444	0.317938	0.444444
PEL	chr1:212649295-212811057	212741763	rs11119974	0.417647	0.421541	0.511765	ATF3	ENSG00000162772	Hezhen	0.388889	0.258454	0.388889
PEL	chr1:212649295-212811057	212741763	rs11119974	0.417647	0.421541	0.511765	ATF3	ENSG00000162772	JPT	0.27451	0.225703	0.284314
PEL	chr1:212649295-212811057	212741763	rs11119974	0.417647	0.421541	0.511765	ATF3	ENSG00000162772	Japanese	0.339286	0.233705	0.357143
PEL	chr1:212649295-212811057	212741763	rs11119974	0.417647	0.421541	0.511765	ATF3	ENSG00000162772	KHV	0.30303	0.284731	0.328283
PEL	chr1:212649295-212811057	212741763	rs11119974	0.417647	0.421541	0.511765	ATF3	ENSG00000162772	Karitiana	0.416667	0.328767	0.541667
PEL	chr1:212649295-212811057	212741763	rs11119974	0.417647	0.421541	0.511765	ATF3	ENSG00000162772	MXL	0.28125	0.245811	0.28125
PEL	chr1:212649295-212811057	212741763	rs11119974	0.417647	0.421541	0.511765	ATF3	ENSG00000162772	Maya	0.547619	0.540241	0.666667
PEL	chr1:212649295-212811057	212741763	rs11119974	0.417647	0.421541	0.511765	ATF3	ENSG00000162772	Miao	0.4	0.407627	0.45
PEL	chr1:212649295-212811057	212741763	rs11119974	0.417647	0.421541	0.511765	ATF3	ENSG00000162772	Mongola	0.4	0.305556	0.4
PEL	chr1:212649295-212811057	212741763	rs11119974	0.417647	0.421541	0.511765	ATF3	ENSG00000162772	Naxi	0.5	0.45873	0.5
PEL	chr1:212649295-212811057	212741763	rs11119974	0.417647	0.421541	0.511765	ATF3	ENSG00000162772	Pima	0.464286	0.349207	0.571429
PEL	chr1:212649295-212811057	212741763	rs11119974	0.417647	0.421541	0.511765	ATF3	ENSG00000162772	Surui	0.75	0.75	0.75
PEL	chr1:212649295-212811057	212741763	rs11119974	0.417647	0.421541	0.511765	ATF3	ENSG00000162772	Tu	0.3125	0.200868	0.375
PEL	chr1:212649295-212811057	212741763	rs11119974	0.417647	0.421541	0.511765	ATF3	ENSG00000162772	Uygur	0.25	0.239943	0.25
PEL	chr1:212649295-212811057	212741763	rs11119974	0.417647	0.421541	0.511765	ATF3	ENSG00000162772	Xibo	0.277778	0.0918274	0.333333
PEL	chr1:212649295-212811057	212741763	rs11119974	0.417647	0.421541	0.511765	ATF3	ENSG00000162772	Yakut	0.26	0.272857	0.3
PEL	chr1:212649295-212811057	212742400	rs10863980	0.417647	0.421541	0.511765	ATF3	ENSG00000162772	CHB	0.427184	0.111005	0.446602
PEL	chr1:212649295-212811057	212742400	rs10863980	0.417647	0.421541	0.511765	ATF3	ENSG00000162772	CHS	0.404762	0.36853	0.428571
PEL	chr1:212649295-212811057	212742400	rs10863980	0.417647	0.421541	0.511765	ATF3	ENSG00000162772	Cambodian	0.3	0.276562	0.35
PEL	chr1:212649295-212811057	212742400	rs10863980	0.417647	0.421541	0.511765	ATF3	ENSG00000162772	Colombian	0.5	0.526157	0.642857
PEL	chr1:212649295-212811057	212742400	rs10863980	0.417647	0.421541	0.511765	ATF3	ENSG00000162772	Dai	0.277778	0.186806	0.277778
PEL	chr1:212649295-212811057	212742400	rs10863980	0.417647	0.421541	0.511765	ATF3	ENSG00000162772	Daur	0.444444	0.317938	0.444444
PEL	chr1:212649295-212811057	212742400	rs10863980	0.417647	0.421541	0.511765	ATF3	ENSG00000162772	Hezhen	0.388889	0.258454	0.388889
PEL	chr1:212649295-212811057	212742400	rs10863980	0.417647	0.421541	0.511765	ATF3	ENSG00000162772	JPT	0.27451	0.225703	0.284314
PEL	chr1:212649295-212811057	212742400	rs10863980	0.417647	0.421541	0.511765	ATF3	ENSG00000162772	Japanese	0.339286	0.233705	0.357143
PEL	chr1:212649295-212811057	212742400	rs10863980	0.417647	0.421541	0.511765	ATF3	ENSG00000162772	KHV	0.30303	0.284731	0.328283
PEL	chr1:212649295-212811057	212742400	rs10863980	0.417647	0.421541	0.511765	ATF3	ENSG00000162772	Karitiana	0.416667	0.328767	0.541667
PEL	chr1:212649295-212811057	212742400	rs10863980	0.417647	0.421541	0.511765	ATF3	ENSG00000162772	MXL	0.28125	0.245811	0.28125
PEL	chr1:212649295-212811057	212742400	rs10863980	0.417647	0.421541	0.511765	ATF3	ENSG00000162772	Maya	0.547619	0.540241	0.666667
PEL	chr1:212649295-212811057	212742400	rs10863980	0.417647	0.421541	0.511765	ATF3	ENSG00000162772	Miao	0.4	0.407627	0.45
PEL	chr1:212649295-212811057	212742400	rs10863980	0.417647	0.421541	0.511765	ATF3	ENSG00000162772	Mongola	0.4	0.305556	0.4
PEL	chr1:212649295-212811057	212742400	rs10863980	0.417647	0.421541	0.511765	ATF3	ENSG00000162772	Naxi	0.5	0.45873	0.5
PEL	chr1:212649295-212811057	212742400	rs10863980	0.417647	0.421541	0.511765	ATF3	ENSG00000162772	Pima	0.464286	0.349207	0.571429
PEL	chr1:212649295-212811057	212742400	rs10863980	0.417647	0.421541	0.511765	ATF3	ENSG00000162772	Surui	0.75	0.75	0.75
PEL	chr1:212649295-212811057	212742400	rs10863980	0.417647	0.421541	0.511765	ATF3	ENSG00000162772	Tu	0.3125	0.200868	0.375
PEL	chr1:212649295-212811057	212742400	rs10863980	0.417647	0.421541	0.511765	ATF3	ENSG00000162772	Uygur	0.25	0.239943	0.25
PEL	chr1:212649295-212811057	212742400	rs10863980	0.417647	0.421541	0.511765	ATF3	ENSG00000162772	Xibo	0.277778	0.0918274	0.333333
PEL	chr1:212649295-212811057	212742400	rs10863980	0.417647	0.421541	0.511765	ATF3	ENSG00000162772	Yakut	0.26	0.272857	0.3
PEL	chr1:212649295-212811057	212742675	rs4951613	0.417647	0.421541	0.511765	ATF3	ENSG00000162772	CHB	0.427184	0.111005	0.446602
PEL	chr1:212649295-212811057	212742675	rs4951613	0.417647	0.421541	0.511765	ATF3	ENSG00000162772	CHS	0.404762	0.36853	0.428571
PEL	chr1:212649295-212811057	212742675	rs4951613	0.417647	0.421541	0.511765	ATF3	ENSG00000162772	Cambodian	0.3	0.276562	0.35
PEL	chr1:212649295-212811057	212742675	rs4951613	0.417647	0.421541	0.511765	ATF3	ENSG00000162772	Colombian	0.5	0.526157	0.642857
PEL	chr1:212649295-212811057	212742675	rs4951613	0.417647	0.421541	0.511765	ATF3	ENSG00000162772	Dai	0.277778	0.186806	0.277778
PEL	chr1:212649295-212811057	212742675	rs4951613	0.417647	0.421541	0.511765	ATF3	ENSG00000162772	Daur	0.444444	0.317938	0.444444
PEL	chr1:212649295-212811057	212742675	rs4951613	0.417647	0.421541	0.511765	ATF3	ENSG00000162772	Hezhen	0.388889	0.258454	0.388889
PEL	chr1:212649295-212811057	212742675	rs4951613	0.417647	0.421541	0.511765	ATF3	ENSG00000162772	JPT	0.27451	0.225703	0.284314
PEL	chr1:212649295-212811057	212742675	rs4951613	0.417647	0.421541	0.511765	ATF3	ENSG00000162772	Japanese	0.339286	0.233705	0.357143
PEL	chr1:212649295-212811057	212742675	rs4951613	0.417647	0.421541	0.511765	ATF3	ENSG00000162772	KHV	0.30303	0.284731	0.328283
PEL	chr1:212649295-212811057	212742675	rs4951613	0.417647	0.421541	0.511765	ATF3	ENSG00000162772	Karitiana	0.416667	0.328767	0.541667
PEL	chr1:212649295-212811057	212742675	rs4951613	0.417647	0.421541	0.511765	ATF3	ENSG00000162772	MXL	0.28125	0.245811	0.28125
PEL	chr1:212649295-212811057	212742675	rs4951613	0.417647	0.421541	0.511765	ATF3	ENSG00000162772	Maya	0.547619	0.540241	0.666667
PEL	chr1:212649295-212811057	212742675	rs4951613	0.417647	0.421541	0.511765	ATF3	ENSG00000162772	Miao	0.4	0.407627	0.45
PEL	chr1:212649295-212811057	212742675	rs4951613	0.417647	0.421541	0.511765	ATF3	ENSG00000162772	Mongola	0.4	0.305556	0.4
PEL	chr1:212649295-212811057	212742675	rs4951613	0.417647	0.421541	0.511765	ATF3	ENSG00000162772	Naxi	0.5	0.45873	0.5
PEL	chr1:212649295-212811057	212742675	rs4951613	0.417647	0.421541	0.511765	ATF3	ENSG00000162772	Pima	0.464286	0.349207	0.571429
PEL	chr1:212649295-212811057	212742675	rs4951613	0.417647	0.421541	0.511765	ATF3	ENSG00000162772	Surui	0.75	0.75	0.75
PEL	chr1:212649295-212811057	212742675	rs4951613	0.417647	0.421541	0.511765	ATF3	ENSG00000162772	Tu	0.3125	0.200868	0.375
PEL	chr1:212649295-212811057	212742675	rs4951613	0.417647	0.421541	0.511765	ATF3	ENSG00000162772	Uygur	0.25	0.239943	0.25
PEL	chr1:212649295-212811057	212742675	rs4951613	0.417647	0.421541	0.511765	ATF3	ENSG00000162772	Xibo	0.277778	0.0918274	0.333333
PEL	chr1:212649295-212811057	212742675	rs4951613	0.417647	0.421541	0.511765	ATF3	ENSG00000162772	Yakut	0.26	0.272857	0.3
PEL	chr1:212649295-212811057	212744370	rs12038766	0.417647	0.421541	0.511765	ATF3	ENSG00000162772	CHB	0.427184	0.111005	0.446602
PEL	chr1:212649295-212811057	212744370	rs12038766	0.417647	0.421541	0.511765	ATF3	ENSG00000162772	CHS	0.404762	0.36853	0.428571
PEL	chr1:212649295-212811057	212744370	rs12038766	0.417647	0.421541	0.511765	ATF3	ENSG00000162772	Colombian	0.5	0.526157	0.642857
PEL	chr1:212649295-212811057	212744370	rs12038766	0.417647	0.421541	0.511765	ATF3	ENSG00000162772	Dai	0.277778	0.186806	0.277778
PEL	chr1:212649295-212811057	212744370	rs12038766	0.417647	0.421541	0.511765	ATF3	ENSG00000162772	Daur	0.444444	0.317938	0.444444
PEL	chr1:212649295-212811057	212744370	rs12038766	0.417647	0.421541	0.511765	ATF3	ENSG00000162772	Hezhen	0.388889	0.258454	0.388889
PEL	chr1:212649295-212811057	212744370	rs12038766	0.417647	0.421541	0.511765	ATF3	ENSG00000162772	JPT	0.27451	0.225703	0.284314
PEL	chr1:212649295-212811057	212744370	rs12038766	0.417647	0.421541	0.511765	ATF3	ENSG00000162772	Japanese	0.339286	0.233705	0.357143
PEL	chr1:212649295-212811057	212744370	rs12038766	0.417647	0.421541	0.511765	ATF3	ENSG00000162772	KHV	0.30303	0.284731	0.328283
PEL	chr1:212649295-212811057	212744370	rs12038766	0.417647	0.421541	0.511765	ATF3	ENSG00000162772	Karitiana	0.416667	0.328767	0.541667
PEL	chr1:212649295-212811057	212744370	rs12038766	0.417647	0.421541	0.511765	ATF3	ENSG00000162772	MXL	0.28125	0.245811	0.28125
PEL	chr1:212649295-212811057	212744370	rs12038766	0.417647	0.421541	0.511765	ATF3	ENSG00000162772	Miao	0.4	0.407627	0.45
PEL	chr1:212649295-212811057	212744370	rs12038766	0.417647	0.421541	0.511765	ATF3	ENSG00000162772	Mongola	0.4	0.305556	0.4
PEL	chr1:212649295-212811057	212744370	rs12038766	0.417647	0.421541	0.511765	ATF3	ENSG00000162772	Naxi	0.5	0.45873	0.5
PEL	chr1:212649295-212811057	212744370	rs12038766	0.417647	0.421541	0.511765	ATF3	ENSG00000162772	Pima	0.464286	0.349207	0.571429
PEL	chr1:212649295-212811057	212744370	rs12038766	0.417647	0.421541	0.511765	ATF3	ENSG00000162772	Surui	0.75	0.75	0.75
PEL	chr1:212649295-212811057	212744370	rs12038766	0.417647	0.421541	0.511765	ATF3	ENSG00000162772	Tu	0.3125	0.200868	0.375
PEL	chr1:212649295-212811057	212744370	rs12038766	0.417647	0.421541	0.511765	ATF3	ENSG00000162772	Uygur	0.25	0.239943	0.25
PEL	chr1:212649295-212811057	212744370	rs12038766	0.417647	0.421541	0.511765	ATF3	ENSG00000162772	Xibo	0.277778	0.0918274	0.333333
PEL	chr1:212649295-212811057	212744370	rs12038766	0.417647	0.421541	0.511765	ATF3	ENSG00000162772	Yakut	0.26	0.272857	0.3
Mongola	chr1:212649295-212811057	212738835	rs3806460	0.4	0.305556	0.4	ENSG00000288007	ENSG00000288007	CHB	0.427184	0.111005	0.446602
Mongola	chr1:212649295-212811057	212738835	rs3806460	0.4	0.305556	0.4	ENSG00000288007	ENSG00000288007	CHS	0.404762	0.36853	0.428571
Mongola	chr1:212649295-212811057	212738835	rs3806460	0.4	0.305556	0.4	ENSG00000288007	ENSG00000288007	Cambodian	0.3	0.276562	0.35
Mongola	chr1:212649295-212811057	212738835	rs3806460	0.4	0.305556	0.4	ENSG00000288007	ENSG00000288007	Colombian	0.5	0.526157	0.642857
Mongola	chr1:212649295-212811057	212738835	rs3806460	0.4	0.305556	0.4	ENSG00000288007	ENSG00000288007	Dai	0.277778	0.186806	0.277778
Mongola	chr1:212649295-212811057	212738835	rs3806460	0.4	0.305556	0.4	ENSG00000288007	ENSG00000288007	Daur	0.444444	0.317938	0.444444
Mongola	chr1:212649295-212811057	212738835	rs3806460	0.4	0.305556	0.4	ENSG00000288007	ENSG00000288007	Hezhen	0.388889	0.258454	0.388889
Mongola	chr1:212649295-212811057	212738835	rs3806460	0.4	0.305556	0.4	ENSG00000288007	ENSG00000288007	JPT	0.27451	0.225703	0.284314
Mongola	chr1:212649295-212811057	212738835	rs3806460	0.4	0.305556	0.4	ENSG00000288007	ENSG00000288007	Japanese	0.339286	0.233705	0.357143
Mongola	chr1:212649295-212811057	212738835	rs3806460	0.4	0.305556	0.4	ENSG00000288007	ENSG00000288007	KHV	0.30303	0.284731	0.328283
Mongola	chr1:212649295-212811057	212738835	rs3806460	0.4	0.305556	0.4	ENSG00000288007	ENSG00000288007	Karitiana	0.416667	0.328767	0.541667
Mongola	chr1:212649295-212811057	212738835	rs3806460	0.4	0.305556	0.4	ENSG00000288007	ENSG00000288007	MXL	0.28125	0.245811	0.28125
Mongola	chr1:212649295-212811057	212738835	rs3806460	0.4	0.305556	0.4	ENSG00000288007	ENSG00000288007	Maya	0.547619	0.540241	0.666667
Mongola	chr1:212649295-212811057	212738835	rs3806460	0.4	0.305556	0.4	ENSG00000288007	ENSG00000288007	Miao	0.4	0.407627	0.45
Mongola	chr1:212649295-212811057	212738835	rs3806460	0.4	0.305556	0.4	ENSG00000288007	ENSG00000288007	Naxi	0.5	0.45873	0.5
Mongola	chr1:212649295-212811057	212738835	rs3806460	0.4	0.305556	0.4	ENSG00000288007	ENSG00000288007	PEL	0.417647	0.421541	0.511765
Mongola	chr1:212649295-212811057	212738835	rs3806460	0.4	0.305556	0.4	ENSG00000288007	ENSG00000288007	Pima	0.464286	0.349207	0.571429
Mongola	chr1:212649295-212811057	212738835	rs3806460	0.4	0.305556	0.4	ENSG00000288007	ENSG00000288007	Surui	0.75	0.75	0.75
Mongola	chr1:212649295-212811057	212738835	rs3806460	0.4	0.305556	0.4	ENSG00000288007	ENSG00000288007	Tu	0.3125	0.200868	0.375
Mongola	chr1:212649295-212811057	212738835	rs3806460	0.4	0.305556	0.4	ENSG00000288007	ENSG00000288007	Uygur	0.25	0.239943	0.25
Mongola	chr1:212649295-212811057	212738835	rs3806460	0.4	0.305556	0.4	ENSG00000288007	ENSG00000288007	Xibo	0.277778	0.0918274	0.333333
Mongola	chr1:212649295-212811057	212738835	rs3806460	0.4	0.305556	0.4	ENSG00000288007	ENSG00000288007	Yakut	0.26	0.272857	0.3
Mongola	chr1:212649295-212811057	212741763	rs11119974	0.4	0.305556	0.4	ATF3	ENSG00000162772	CHB	0.427184	0.111005	0.446602
Mongola	chr1:212649295-212811057	212741763	rs11119974	0.4	0.305556	0.4	ATF3	ENSG00000162772	CHS	0.404762	0.36853	0.428571
Mongola	chr1:212649295-212811057	212741763	rs11119974	0.4	0.305556	0.4	ATF3	ENSG00000162772	Cambodian	0.3	0.276562	0.35
Mongola	chr1:212649295-212811057	212741763	rs11119974	0.4	0.305556	0.4	ATF3	ENSG00000162772	Colombian	0.5	0.526157	0.642857
Mongola	chr1:212649295-212811057	212741763	rs11119974	0.4	0.305556	0.4	ATF3	ENSG00000162772	Dai	0.277778	0.186806	0.277778
Mongola	chr1:212649295-212811057	212741763	rs11119974	0.4	0.305556	0.4	ATF3	ENSG00000162772	Daur	0.444444	0.317938	0.444444
Mongola	chr1:212649295-212811057	212741763	rs11119974	0.4	0.305556	0.4	ATF3	ENSG00000162772	Hezhen	0.388889	0.258454	0.388889
Mongola	chr1:212649295-212811057	212741763	rs11119974	0.4	0.305556	0.4	ATF3	ENSG00000162772	JPT	0.27451	0.225703	0.284314
Mongola	chr1:212649295-212811057	212741763	rs11119974	0.4	0.305556	0.4	ATF3	ENSG00000162772	Japanese	0.339286	0.233705	0.357143
Mongola	chr1:212649295-212811057	212741763	rs11119974	0.4	0.305556	0.4	ATF3	ENSG00000162772	KHV	0.30303	0.284731	0.328283
Mongola	chr1:212649295-212811057	212741763	rs11119974	0.4	0.305556	0.4	ATF3	ENSG00000162772	Karitiana	0.416667	0.328767	0.541667
Mongola	chr1:212649295-212811057	212741763	rs11119974	0.4	0.305556	0.4	ATF3	ENSG00000162772	MXL	0.28125	0.245811	0.28125
Mongola	chr1:212649295-212811057	212741763	rs11119974	0.4	0.305556	0.4	ATF3	ENSG00000162772	Maya	0.547619	0.540241	0.666667
Mongola	chr1:212649295-212811057	212741763	rs11119974	0.4	0.305556	0.4	ATF3	ENSG00000162772	Miao	0.4	0.407627	0.45
Mongola	chr1:212649295-212811057	212741763	rs11119974	0.4	0.305556	0.4	ATF3	ENSG00000162772	Naxi	0.5	0.45873	0.5
Mongola	chr1:212649295-212811057	212741763	rs11119974	0.4	0.305556	0.4	ATF3	ENSG00000162772	PEL	0.417647	0.421541	0.511765
Mongola	chr1:212649295-212811057	212741763	rs11119974	0.4	0.305556	0.4	ATF3	ENSG00000162772	Pima	0.464286	0.349207	0.571429
Mongola	chr1:212649295-212811057	212741763	rs11119974	0.4	0.305556	0.4	ATF3	ENSG00000162772	Surui	0.75	0.75	0.75
Mongola	chr1:212649295-212811057	212741763	rs11119974	0.4	0.305556	0.4	ATF3	ENSG00000162772	Tu	0.3125	0.200868	0.375
Mongola	chr1:212649295-212811057	212741763	rs11119974	0.4	0.305556	0.4	ATF3	ENSG00000162772	Uygur	0.25	0.239943	0.25
Mongola	chr1:212649295-212811057	212741763	rs11119974	0.4	0.305556	0.4	ATF3	ENSG00000162772	Xibo	0.277778	0.0918274	0.333333
Mongola	chr1:212649295-212811057	212741763	rs11119974	0.4	0.305556	0.4	ATF3	ENSG00000162772	Yakut	0.26	0.272857	0.3
Mongola	chr1:212649295-212811057	212742400	rs10863980	0.4	0.305556	0.4	ATF3	ENSG00000162772	CHB	0.427184	0.111005	0.446602
Mongola	chr1:212649295-212811057	212742400	rs10863980	0.4	0.305556	0.4	ATF3	ENSG00000162772	CHS	0.404762	0.36853	0.428571
Mongola	chr1:212649295-212811057	212742400	rs10863980	0.4	0.305556	0.4	ATF3	ENSG00000162772	Cambodian	0.3	0.276562	0.35
Mongola	chr1:212649295-212811057	212742400	rs10863980	0.4	0.305556	0.4	ATF3	ENSG00000162772	Colombian	0.5	0.526157	0.642857
Mongola	chr1:212649295-212811057	212742400	rs10863980	0.4	0.305556	0.4	ATF3	ENSG00000162772	Dai	0.277778	0.186806	0.277778
Mongola	chr1:212649295-212811057	212742400	rs10863980	0.4	0.305556	0.4	ATF3	ENSG00000162772	Daur	0.444444	0.317938	0.444444
Mongola	chr1:212649295-212811057	212742400	rs10863980	0.4	0.305556	0.4	ATF3	ENSG00000162772	Hezhen	0.388889	0.258454	0.388889
Mongola	chr1:212649295-212811057	212742400	rs10863980	0.4	0.305556	0.4	ATF3	ENSG00000162772	JPT	0.27451	0.225703	0.284314
Mongola	chr1:212649295-212811057	212742400	rs10863980	0.4	0.305556	0.4	ATF3	ENSG00000162772	Japanese	0.339286	0.233705	0.357143
Mongola	chr1:212649295-212811057	212742400	rs10863980	0.4	0.305556	0.4	ATF3	ENSG00000162772	KHV	0.30303	0.284731	0.328283
Mongola	chr1:212649295-212811057	212742400	rs10863980	0.4	0.305556	0.4	ATF3	ENSG00000162772	Karitiana	0.416667	0.328767	0.541667
Mongola	chr1:212649295-212811057	212742400	rs10863980	0.4	0.305556	0.4	ATF3	ENSG00000162772	MXL	0.28125	0.245811	0.28125
Mongola	chr1:212649295-212811057	212742400	rs10863980	0.4	0.305556	0.4	ATF3	ENSG00000162772	Maya	0.547619	0.540241	0.666667
Mongola	chr1:212649295-212811057	212742400	rs10863980	0.4	0.305556	0.4	ATF3	ENSG00000162772	Miao	0.4	0.407627	0.45
Mongola	chr1:212649295-212811057	212742400	rs10863980	0.4	0.305556	0.4	ATF3	ENSG00000162772	Naxi	0.5	0.45873	0.5
Mongola	chr1:212649295-212811057	212742400	rs10863980	0.4	0.305556	0.4	ATF3	ENSG00000162772	PEL	0.417647	0.421541	0.511765
Mongola	chr1:212649295-212811057	212742400	rs10863980	0.4	0.305556	0.4	ATF3	ENSG00000162772	Pima	0.464286	0.349207	0.571429
Mongola	chr1:212649295-212811057	212742400	rs10863980	0.4	0.305556	0.4	ATF3	ENSG00000162772	Surui	0.75	0.75	0.75
Mongola	chr1:212649295-212811057	212742400	rs10863980	0.4	0.305556	0.4	ATF3	ENSG00000162772	Tu	0.3125	0.200868	0.375
Mongola	chr1:212649295-212811057	212742400	rs10863980	0.4	0.305556	0.4	ATF3	ENSG00000162772	Uygur	0.25	0.239943	0.25
Mongola	chr1:212649295-212811057	212742400	rs10863980	0.4	0.305556	0.4	ATF3	ENSG00000162772	Xibo	0.277778	0.0918274	0.333333
Mongola	chr1:212649295-212811057	212742400	rs10863980	0.4	0.305556	0.4	ATF3	ENSG00000162772	Yakut	0.26	0.272857	0.3
Mongola	chr1:212649295-212811057	212742675	rs4951613	0.4	0.305556	0.4	ATF3	ENSG00000162772	CHB	0.427184	0.111005	0.446602
Mongola	chr1:212649295-212811057	212742675	rs4951613	0.4	0.305556	0.4	ATF3	ENSG00000162772	CHS	0.404762	0.36853	0.428571
Mongola	chr1:212649295-212811057	212742675	rs4951613	0.4	0.305556	0.4	ATF3	ENSG00000162772	Cambodian	0.3	0.276562	0.35
Mongola	chr1:212649295-212811057	212742675	rs4951613	0.4	0.305556	0.4	ATF3	ENSG00000162772	Colombian	0.5	0.526157	0.642857
Mongola	chr1:212649295-212811057	212742675	rs4951613	0.4	0.305556	0.4	ATF3	ENSG00000162772	Dai	0.277778	0.186806	0.277778
Mongola	chr1:212649295-212811057	212742675	rs4951613	0.4	0.305556	0.4	ATF3	ENSG00000162772	Daur	0.444444	0.317938	0.444444
Mongola	chr1:212649295-212811057	212742675	rs4951613	0.4	0.305556	0.4	ATF3	ENSG00000162772	Hezhen	0.388889	0.258454	0.388889
Mongola	chr1:212649295-212811057	212742675	rs4951613	0.4	0.305556	0.4	ATF3	ENSG00000162772	JPT	0.27451	0.225703	0.284314
Mongola	chr1:212649295-212811057	212742675	rs4951613	0.4	0.305556	0.4	ATF3	ENSG00000162772	Japanese	0.339286	0.233705	0.357143
Mongola	chr1:212649295-212811057	212742675	rs4951613	0.4	0.305556	0.4	ATF3	ENSG00000162772	KHV	0.30303	0.284731	0.328283
Mongola	chr1:212649295-212811057	212742675	rs4951613	0.4	0.305556	0.4	ATF3	ENSG00000162772	Karitiana	0.416667	0.328767	0.541667
Mongola	chr1:212649295-212811057	212742675	rs4951613	0.4	0.305556	0.4	ATF3	ENSG00000162772	MXL	0.28125	0.245811	0.28125
Mongola	chr1:212649295-212811057	212742675	rs4951613	0.4	0.305556	0.4	ATF3	ENSG00000162772	Maya	0.547619	0.540241	0.666667
Mongola	chr1:212649295-212811057	212742675	rs4951613	0.4	0.305556	0.4	ATF3	ENSG00000162772	Miao	0.4	0.407627	0.45
Mongola	chr1:212649295-212811057	212742675	rs4951613	0.4	0.305556	0.4	ATF3	ENSG00000162772	Naxi	0.5	0.45873	0.5
Mongola	chr1:212649295-212811057	212742675	rs4951613	0.4	0.305556	0.4	ATF3	ENSG00000162772	PEL	0.417647	0.421541	0.511765
Mongola	chr1:212649295-212811057	212742675	rs4951613	0.4	0.305556	0.4	ATF3	ENSG00000162772	Pima	0.464286	0.349207	0.571429
Mongola	chr1:212649295-212811057	212742675	rs4951613	0.4	0.305556	0.4	ATF3	ENSG00000162772	Surui	0.75	0.75	0.75
Mongola	chr1:212649295-212811057	212742675	rs4951613	0.4	0.305556	0.4	ATF3	ENSG00000162772	Tu	0.3125	0.200868	0.375
Mongola	chr1:212649295-212811057	212742675	rs4951613	0.4	0.305556	0.4	ATF3	ENSG00000162772	Uygur	0.25	0.239943	0.25
Mongola	chr1:212649295-212811057	212742675	rs4951613	0.4	0.305556	0.4	ATF3	ENSG00000162772	Xibo	0.277778	0.0918274	0.333333
Mongola	chr1:212649295-212811057	212742675	rs4951613	0.4	0.305556	0.4	ATF3	ENSG00000162772	Yakut	0.26	0.272857	0.3
Mongola	chr1:212649295-212811057	212744370	rs12038766	0.4	0.305556	0.4	ATF3	ENSG00000162772	CHB	0.427184	0.111005	0.446602
Mongola	chr1:212649295-212811057	212744370	rs12038766	0.4	0.305556	0.4	ATF3	ENSG00000162772	CHS	0.404762	0.36853	0.428571
Mongola	chr1:212649295-212811057	212744370	rs12038766	0.4	0.305556	0.4	ATF3	ENSG00000162772	Colombian	0.5	0.526157	0.642857
Mongola	chr1:212649295-212811057	212744370	rs12038766	0.4	0.305556	0.4	ATF3	ENSG00000162772	Dai	0.277778	0.186806	0.277778
Mongola	chr1:212649295-212811057	212744370	rs12038766	0.4	0.305556	0.4	ATF3	ENSG00000162772	Daur	0.444444	0.317938	0.444444
Mongola	chr1:212649295-212811057	212744370	rs12038766	0.4	0.305556	0.4	ATF3	ENSG00000162772	Hezhen	0.388889	0.258454	0.388889
Mongola	chr1:212649295-212811057	212744370	rs12038766	0.4	0.305556	0.4	ATF3	ENSG00000162772	JPT	0.27451	0.225703	0.284314
Mongola	chr1:212649295-212811057	212744370	rs12038766	0.4	0.305556	0.4	ATF3	ENSG00000162772	Japanese	0.339286	0.233705	0.357143
Mongola	chr1:212649295-212811057	212744370	rs12038766	0.4	0.305556	0.4	ATF3	ENSG00000162772	KHV	0.30303	0.284731	0.328283
Mongola	chr1:212649295-212811057	212744370	rs12038766	0.4	0.305556	0.4	ATF3	ENSG00000162772	Karitiana	0.416667	0.328767	0.541667
Mongola	chr1:212649295-212811057	212744370	rs12038766	0.4	0.305556	0.4	ATF3	ENSG00000162772	MXL	0.28125	0.245811	0.28125
Mongola	chr1:212649295-212811057	212744370	rs12038766	0.4	0.305556	0.4	ATF3	ENSG00000162772	Miao	0.4	0.407627	0.45
Mongola	chr1:212649295-212811057	212744370	rs12038766	0.4	0.305556	0.4	ATF3	ENSG00000162772	Naxi	0.5	0.45873	0.5
Mongola	chr1:212649295-212811057	212744370	rs12038766	0.4	0.305556	0.4	ATF3	ENSG00000162772	PEL	0.417647	0.421541	0.511765
Mongola	chr1:212649295-212811057	212744370	rs12038766	0.4	0.305556	0.4	ATF3	ENSG00000162772	Pima	0.464286	0.349207	0.571429
Mongola	chr1:212649295-212811057	212744370	rs12038766	0.4	0.305556	0.4	ATF3	ENSG00000162772	Surui	0.75	0.75	0.75
Mongola	chr1:212649295-212811057	212744370	rs12038766	0.4	0.305556	0.4	ATF3	ENSG00000162772	Tu	0.3125	0.200868	0.375
Mongola	chr1:212649295-212811057	212744370	rs12038766	0.4	0.305556	0.4	ATF3	ENSG00000162772	Uygur	0.25	0.239943	0.25
Mongola	chr1:212649295-212811057	212744370	rs12038766	0.4	0.305556	0.4	ATF3	ENSG00000162772	Xibo	0.277778	0.0918274	0.333333
Mongola	chr1:212649295-212811057	212744370	rs12038766	0.4	0.305556	0.4	ATF3	ENSG00000162772	Yakut	0.26	0.272857	0.3
Mongola	chr1:212649295-212811057	212747722	rs11119975	0.4	0.305556	0.4	ATF3	ENSG00000162772	CHB	0.427184	0.111005	0.446602
Mongola	chr1:212649295-212811057	212747722	rs11119975	0.4	0.305556	0.4	ATF3	ENSG00000162772	CHS	0.404762	0.36853	0.428571
Mongola	chr1:212649295-212811057	212747722	rs11119975	0.4	0.305556	0.4	ATF3	ENSG00000162772	Colombian	0.5	0.526157	0.642857
Mongola	chr1:212649295-212811057	212747722	rs11119975	0.4	0.305556	0.4	ATF3	ENSG00000162772	Dai	0.277778	0.186806	0.277778
Mongola	chr1:212649295-212811057	212747722	rs11119975	0.4	0.305556	0.4	ATF3	ENSG00000162772	Daur	0.444444	0.317938	0.444444
Mongola	chr1:212649295-212811057	212747722	rs11119975	0.4	0.305556	0.4	ATF3	ENSG00000162772	Hezhen	0.388889	0.258454	0.388889
Mongola	chr1:212649295-212811057	212747722	rs11119975	0.4	0.305556	0.4	ATF3	ENSG00000162772	JPT	0.27451	0.225703	0.284314
Mongola	chr1:212649295-212811057	212747722	rs11119975	0.4	0.305556	0.4	ATF3	ENSG00000162772	Japanese	0.321429	0.233705	0.357143
Mongola	chr1:212649295-212811057	212747722	rs11119975	0.4	0.305556	0.4	ATF3	ENSG00000162772	KHV	0.30303	0.284731	0.328283
Mongola	chr1:212649295-212811057	212747722	rs11119975	0.4	0.305556	0.4	ATF3	ENSG00000162772	Karitiana	0.416667	0.328767	0.541667
Mongola	chr1:212649295-212811057	212747722	rs11119975	0.4	0.305556	0.4	ATF3	ENSG00000162772	MXL	0.273438	0.245811	0.28125
Mongola	chr1:212649295-212811057	212747722	rs11119975	0.4	0.305556	0.4	ATF3	ENSG00000162772	Maya	0.547619	0.540241	0.666667
Mongola	chr1:212649295-212811057	212747722	rs11119975	0.4	0.305556	0.4	ATF3	ENSG00000162772	Miao	0.4	0.407627	0.45
Mongola	chr1:212649295-212811057	212747722	rs11119975	0.4	0.305556	0.4	ATF3	ENSG00000162772	Naxi	0.5	0.45873	0.5
Mongola	chr1:212649295-212811057	212747722	rs11119975	0.4	0.305556	0.4	ATF3	ENSG00000162772	PEL	0.411765	0.421541	0.511765
Mongola	chr1:212649295-212811057	212747722	rs11119975	0.4	0.305556	0.4	ATF3	ENSG00000162772	Pima	0.464286	0.349207	0.571429
Mongola	chr1:212649295-212811057	212747722	rs11119975	0.4	0.305556	0.4	ATF3	ENSG00000162772	Surui	0.75	0.75	0.75
Mongola	chr1:212649295-212811057	212747722	rs11119975	0.4	0.305556	0.4	ATF3	ENSG00000162772	Tu	0.3125	0.200868	0.375
Mongola	chr1:212649295-212811057	212747722	rs11119975	0.4	0.305556	0.4	ATF3	ENSG00000162772	Xibo	0.277778	0.0918274	0.333333
Mongola	chr1:212649295-212811057	212747722	rs11119975	0.4	0.305556	0.4	ATF3	ENSG00000162772	Yakut	0.26	0.272857	0.3
Daur	chr1:212649295-212833618	212738835	rs3806460	0.444444	0.317938	0.444444	ENSG00000288007	ENSG00000288007	CHB	0.427184	0.111005	0.446602
Daur	chr1:212649295-212833618	212738835	rs3806460	0.444444	0.317938	0.444444	ENSG00000288007	ENSG00000288007	CHS	0.404762	0.36853	0.428571
Daur	chr1:212649295-212833618	212738835	rs3806460	0.444444	0.317938	0.444444	ENSG00000288007	ENSG00000288007	Cambodian	0.3	0.276562	0.35
Daur	chr1:212649295-212833618	212738835	rs3806460	0.444444	0.317938	0.444444	ENSG00000288007	ENSG00000288007	Colombian	0.5	0.526157	0.642857
Daur	chr1:212649295-212833618	212738835	rs3806460	0.444444	0.317938	0.444444	ENSG00000288007	ENSG00000288007	Dai	0.277778	0.186806	0.277778
Daur	chr1:212649295-212833618	212738835	rs3806460	0.444444	0.317938	0.444444	ENSG00000288007	ENSG00000288007	Hezhen	0.388889	0.258454	0.388889
Daur	chr1:212649295-212833618	212738835	rs3806460	0.444444	0.317938	0.444444	ENSG00000288007	ENSG00000288007	JPT	0.27451	0.225703	0.284314
Daur	chr1:212649295-212833618	212738835	rs3806460	0.444444	0.317938	0.444444	ENSG00000288007	ENSG00000288007	Japanese	0.339286	0.233705	0.357143
Daur	chr1:212649295-212833618	212738835	rs3806460	0.444444	0.317938	0.444444	ENSG00000288007	ENSG00000288007	KHV	0.30303	0.284731	0.328283
Daur	chr1:212649295-212833618	212738835	rs3806460	0.444444	0.317938	0.444444	ENSG00000288007	ENSG00000288007	Karitiana	0.416667	0.328767	0.541667
Daur	chr1:212649295-212833618	212738835	rs3806460	0.444444	0.317938	0.444444	ENSG00000288007	ENSG00000288007	MXL	0.28125	0.245811	0.28125
Daur	chr1:212649295-212833618	212738835	rs3806460	0.444444	0.317938	0.444444	ENSG00000288007	ENSG00000288007	Maya	0.547619	0.540241	0.666667
Daur	chr1:212649295-212833618	212738835	rs3806460	0.444444	0.317938	0.444444	ENSG00000288007	ENSG00000288007	Miao	0.4	0.407627	0.45
Daur	chr1:212649295-212833618	212738835	rs3806460	0.444444	0.317938	0.444444	ENSG00000288007	ENSG00000288007	Mongola	0.4	0.305556	0.4
Daur	chr1:212649295-212833618	212738835	rs3806460	0.444444	0.317938	0.444444	ENSG00000288007	ENSG00000288007	Naxi	0.5	0.45873	0.5
Daur	chr1:212649295-212833618	212738835	rs3806460	0.444444	0.317938	0.444444	ENSG00000288007	ENSG00000288007	PEL	0.417647	0.421541	0.511765
Daur	chr1:212649295-212833618	212738835	rs3806460	0.444444	0.317938	0.444444	ENSG00000288007	ENSG00000288007	Pima	0.464286	0.349207	0.571429
Daur	chr1:212649295-212833618	212738835	rs3806460	0.444444	0.317938	0.444444	ENSG00000288007	ENSG00000288007	Surui	0.75	0.75	0.75
Daur	chr1:212649295-212833618	212738835	rs3806460	0.444444	0.317938	0.444444	ENSG00000288007	ENSG00000288007	Tu	0.3125	0.200868	0.375
Daur	chr1:212649295-212833618	212738835	rs3806460	0.444444	0.317938	0.444444	ENSG00000288007	ENSG00000288007	Uygur	0.25	0.239943	0.25
Daur	chr1:212649295-212833618	212738835	rs3806460	0.444444	0.317938	0.444444	ENSG00000288007	ENSG00000288007	Xibo	0.277778	0.0918274	0.333333
Daur	chr1:212649295-212833618	212738835	rs3806460	0.444444	0.317938	0.444444	ENSG00000288007	ENSG00000288007	Yakut	0.26	0.272857	0.3
Daur	chr1:212649295-212833618	212741763	rs11119974	0.444444	0.317938	0.444444	ATF3	ENSG00000162772	CHB	0.427184	0.111005	0.446602
Daur	chr1:212649295-212833618	212741763	rs11119974	0.444444	0.317938	0.444444	ATF3	ENSG00000162772	CHS	0.404762	0.36853	0.428571
Daur	chr1:212649295-212833618	212741763	rs11119974	0.444444	0.317938	0.444444	ATF3	ENSG00000162772	Cambodian	0.3	0.276562	0.35
Daur	chr1:212649295-212833618	212741763	rs11119974	0.444444	0.317938	0.444444	ATF3	ENSG00000162772	Colombian	0.5	0.526157	0.642857
Daur	chr1:212649295-212833618	212741763	rs11119974	0.444444	0.317938	0.444444	ATF3	ENSG00000162772	Dai	0.277778	0.186806	0.277778
Daur	chr1:212649295-212833618	212741763	rs11119974	0.444444	0.317938	0.444444	ATF3	ENSG00000162772	Hezhen	0.388889	0.258454	0.388889
Daur	chr1:212649295-212833618	212741763	rs11119974	0.444444	0.317938	0.444444	ATF3	ENSG00000162772	JPT	0.27451	0.225703	0.284314
Daur	chr1:212649295-212833618	212741763	rs11119974	0.444444	0.317938	0.444444	ATF3	ENSG00000162772	Japanese	0.339286	0.233705	0.357143
Daur	chr1:212649295-212833618	212741763	rs11119974	0.444444	0.317938	0.444444	ATF3	ENSG00000162772	KHV	0.30303	0.284731	0.328283
Daur	chr1:212649295-212833618	212741763	rs11119974	0.444444	0.317938	0.444444	ATF3	ENSG00000162772	Karitiana	0.416667	0.328767	0.541667
Daur	chr1:212649295-212833618	212741763	rs11119974	0.444444	0.317938	0.444444	ATF3	ENSG00000162772	MXL	0.28125	0.245811	0.28125
Daur	chr1:212649295-212833618	212741763	rs11119974	0.444444	0.317938	0.444444	ATF3	ENSG00000162772	Maya	0.547619	0.540241	0.666667
Daur	chr1:212649295-212833618	212741763	rs11119974	0.444444	0.317938	0.444444	ATF3	ENSG00000162772	Miao	0.4	0.407627	0.45
Daur	chr1:212649295-212833618	212741763	rs11119974	0.444444	0.317938	0.444444	ATF3	ENSG00000162772	Mongola	0.4	0.305556	0.4
Daur	chr1:212649295-212833618	212741763	rs11119974	0.444444	0.317938	0.444444	ATF3	ENSG00000162772	Naxi	0.5	0.45873	0.5
Daur	chr1:212649295-212833618	212741763	rs11119974	0.444444	0.317938	0.444444	ATF3	ENSG00000162772	PEL	0.417647	0.421541	0.511765
Daur	chr1:212649295-212833618	212741763	rs11119974	0.444444	0.317938	0.444444	ATF3	ENSG00000162772	Pima	0.464286	0.349207	0.571429
Daur	chr1:212649295-212833618	212741763	rs11119974	0.444444	0.317938	0.444444	ATF3	ENSG00000162772	Surui	0.75	0.75	0.75
Daur	chr1:212649295-212833618	212741763	rs11119974	0.444444	0.317938	0.444444	ATF3	ENSG00000162772	Tu	0.3125	0.200868	0.375
Daur	chr1:212649295-212833618	212741763	rs11119974	0.444444	0.317938	0.444444	ATF3	ENSG00000162772	Uygur	0.25	0.239943	0.25
Daur	chr1:212649295-212833618	212741763	rs11119974	0.444444	0.317938	0.444444	ATF3	ENSG00000162772	Xibo	0.277778	0.0918274	0.333333
Daur	chr1:212649295-212833618	212741763	rs11119974	0.444444	0.317938	0.444444	ATF3	ENSG00000162772	Yakut	0.26	0.272857	0.3
Daur	chr1:212649295-212833618	212742400	rs10863980	0.444444	0.317938	0.444444	ATF3	ENSG00000162772	CHB	0.427184	0.111005	0.446602
Daur	chr1:212649295-212833618	212742400	rs10863980	0.444444	0.317938	0.444444	ATF3	ENSG00000162772	CHS	0.404762	0.36853	0.428571
Daur	chr1:212649295-212833618	212742400	rs10863980	0.444444	0.317938	0.444444	ATF3	ENSG00000162772	Cambodian	0.3	0.276562	0.35
Daur	chr1:212649295-212833618	212742400	rs10863980	0.444444	0.317938	0.444444	ATF3	ENSG00000162772	Colombian	0.5	0.526157	0.642857
Daur	chr1:212649295-212833618	212742400	rs10863980	0.444444	0.317938	0.444444	ATF3	ENSG00000162772	Dai	0.277778	0.186806	0.277778
Daur	chr1:212649295-212833618	212742400	rs10863980	0.444444	0.317938	0.444444	ATF3	ENSG00000162772	Hezhen	0.388889	0.258454	0.388889
Daur	chr1:212649295-212833618	212742400	rs10863980	0.444444	0.317938	0.444444	ATF3	ENSG00000162772	JPT	0.27451	0.225703	0.284314
Daur	chr1:212649295-212833618	212742400	rs10863980	0.444444	0.317938	0.444444	ATF3	ENSG00000162772	Japanese	0.339286	0.233705	0.357143
Daur	chr1:212649295-212833618	212742400	rs10863980	0.444444	0.317938	0.444444	ATF3	ENSG00000162772	KHV	0.30303	0.284731	0.328283
Daur	chr1:212649295-212833618	212742400	rs10863980	0.444444	0.317938	0.444444	ATF3	ENSG00000162772	Karitiana	0.416667	0.328767	0.541667
Daur	chr1:212649295-212833618	212742400	rs10863980	0.444444	0.317938	0.444444	ATF3	ENSG00000162772	MXL	0.28125	0.245811	0.28125
Daur	chr1:212649295-212833618	212742400	rs10863980	0.444444	0.317938	0.444444	ATF3	ENSG00000162772	Maya	0.547619	0.540241	0.666667
Daur	chr1:212649295-212833618	212742400	rs10863980	0.444444	0.317938	0.444444	ATF3	ENSG00000162772	Miao	0.4	0.407627	0.45
Daur	chr1:212649295-212833618	212742400	rs10863980	0.444444	0.317938	0.444444	ATF3	ENSG00000162772	Mongola	0.4	0.305556	0.4
Daur	chr1:212649295-212833618	212742400	rs10863980	0.444444	0.317938	0.444444	ATF3	ENSG00000162772	Naxi	0.5	0.45873	0.5
Daur	chr1:212649295-212833618	212742400	rs10863980	0.444444	0.317938	0.444444	ATF3	ENSG00000162772	PEL	0.417647	0.421541	0.511765
Daur	chr1:212649295-212833618	212742400	rs10863980	0.444444	0.317938	0.444444	ATF3	ENSG00000162772	Pima	0.464286	0.349207	0.571429
Daur	chr1:212649295-212833618	212742400	rs10863980	0.444444	0.317938	0.444444	ATF3	ENSG00000162772	Surui	0.75	0.75	0.75
Daur	chr1:212649295-212833618	212742400	rs10863980	0.444444	0.317938	0.444444	ATF3	ENSG00000162772	Tu	0.3125	0.200868	0.375
Daur	chr1:212649295-212833618	212742400	rs10863980	0.444444	0.317938	0.444444	ATF3	ENSG00000162772	Uygur	0.25	0.239943	0.25
Daur	chr1:212649295-212833618	212742400	rs10863980	0.444444	0.317938	0.444444	ATF3	ENSG00000162772	Xibo	0.277778	0.0918274	0.333333
Daur	chr1:212649295-212833618	212742400	rs10863980	0.444444	0.317938	0.444444	ATF3	ENSG00000162772	Yakut	0.26	0.272857	0.3
Daur	chr1:212649295-212833618	212742675	rs4951613	0.444444	0.317938	0.444444	ATF3	ENSG00000162772	CHB	0.427184	0.111005	0.446602
Daur	chr1:212649295-212833618	212742675	rs4951613	0.444444	0.317938	0.444444	ATF3	ENSG00000162772	CHS	0.404762	0.36853	0.428571
Daur	chr1:212649295-212833618	212742675	rs4951613	0.444444	0.317938	0.444444	ATF3	ENSG00000162772	Cambodian	0.3	0.276562	0.35
Daur	chr1:212649295-212833618	212742675	rs4951613	0.444444	0.317938	0.444444	ATF3	ENSG00000162772	Colombian	0.5	0.526157	0.642857
Daur	chr1:212649295-212833618	212742675	rs4951613	0.444444	0.317938	0.444444	ATF3	ENSG00000162772	Dai	0.277778	0.186806	0.277778
Daur	chr1:212649295-212833618	212742675	rs4951613	0.444444	0.317938	0.444444	ATF3	ENSG00000162772	Hezhen	0.388889	0.258454	0.388889
Daur	chr1:212649295-212833618	212742675	rs4951613	0.444444	0.317938	0.444444	ATF3	ENSG00000162772	JPT	0.27451	0.225703	0.284314
Daur	chr1:212649295-212833618	212742675	rs4951613	0.444444	0.317938	0.444444	ATF3	ENSG00000162772	Japanese	0.339286	0.233705	0.357143
Daur	chr1:212649295-212833618	212742675	rs4951613	0.444444	0.317938	0.444444	ATF3	ENSG00000162772	KHV	0.30303	0.284731	0.328283
Daur	chr1:212649295-212833618	212742675	rs4951613	0.444444	0.317938	0.444444	ATF3	ENSG00000162772	Karitiana	0.416667	0.328767	0.541667
Daur	chr1:212649295-212833618	212742675	rs4951613	0.444444	0.317938	0.444444	ATF3	ENSG00000162772	MXL	0.28125	0.245811	0.28125
Daur	chr1:212649295-212833618	212742675	rs4951613	0.444444	0.317938	0.444444	ATF3	ENSG00000162772	Maya	0.547619	0.540241	0.666667
Daur	chr1:212649295-212833618	212742675	rs4951613	0.444444	0.317938	0.444444	ATF3	ENSG00000162772	Miao	0.4	0.407627	0.45
Daur	chr1:212649295-212833618	212742675	rs4951613	0.444444	0.317938	0.444444	ATF3	ENSG00000162772	Mongola	0.4	0.305556	0.4
Daur	chr1:212649295-212833618	212742675	rs4951613	0.444444	0.317938	0.444444	ATF3	ENSG00000162772	Naxi	0.5	0.45873	0.5
Daur	chr1:212649295-212833618	212742675	rs4951613	0.444444	0.317938	0.444444	ATF3	ENSG00000162772	PEL	0.417647	0.421541	0.511765
Daur	chr1:212649295-212833618	212742675	rs4951613	0.444444	0.317938	0.444444	ATF3	ENSG00000162772	Pima	0.464286	0.349207	0.571429
Daur	chr1:212649295-212833618	212742675	rs4951613	0.444444	0.317938	0.444444	ATF3	ENSG00000162772	Surui	0.75	0.75	0.75
Daur	chr1:212649295-212833618	212742675	rs4951613	0.444444	0.317938	0.444444	ATF3	ENSG00000162772	Tu	0.3125	0.200868	0.375
Daur	chr1:212649295-212833618	212742675	rs4951613	0.444444	0.317938	0.444444	ATF3	ENSG00000162772	Uygur	0.25	0.239943	0.25
Daur	chr1:212649295-212833618	212742675	rs4951613	0.444444	0.317938	0.444444	ATF3	ENSG00000162772	Xibo	0.277778	0.0918274	0.333333
Daur	chr1:212649295-212833618	212742675	rs4951613	0.444444	0.317938	0.444444	ATF3	ENSG00000162772	Yakut	0.26	0.272857	0.3
Daur	chr1:212649295-212833618	212744370	rs12038766	0.444444	0.317938	0.444444	ATF3	ENSG00000162772	CHB	0.427184	0.111005	0.446602
Daur	chr1:212649295-212833618	212744370	rs12038766	0.444444	0.317938	0.444444	ATF3	ENSG00000162772	CHS	0.404762	0.36853	0.428571
Daur	chr1:212649295-212833618	212744370	rs12038766	0.444444	0.317938	0.444444	ATF3	ENSG00000162772	Colombian	0.5	0.526157	0.642857
Daur	chr1:212649295-212833618	212744370	rs12038766	0.444444	0.317938	0.444444	ATF3	ENSG00000162772	Dai	0.277778	0.186806	0.277778
Daur	chr1:212649295-212833618	212744370	rs12038766	0.444444	0.317938	0.444444	ATF3	ENSG00000162772	Hezhen	0.388889	0.258454	0.388889
Daur	chr1:212649295-212833618	212744370	rs12038766	0.444444	0.317938	0.444444	ATF3	ENSG00000162772	JPT	0.27451	0.225703	0.284314
Daur	chr1:212649295-212833618	212744370	rs12038766	0.444444	0.317938	0.444444	ATF3	ENSG00000162772	Japanese	0.339286	0.233705	0.357143
Daur	chr1:212649295-212833618	212744370	rs12038766	0.444444	0.317938	0.444444	ATF3	ENSG00000162772	KHV	0.30303	0.284731	0.328283
Daur	chr1:212649295-212833618	212744370	rs12038766	0.444444	0.317938	0.444444	ATF3	ENSG00000162772	Karitiana	0.416667	0.328767	0.541667
Daur	chr1:212649295-212833618	212744370	rs12038766	0.444444	0.317938	0.444444	ATF3	ENSG00000162772	MXL	0.28125	0.245811	0.28125
Daur	chr1:212649295-212833618	212744370	rs12038766	0.444444	0.317938	0.444444	ATF3	ENSG00000162772	Miao	0.4	0.407627	0.45
Daur	chr1:212649295-212833618	212744370	rs12038766	0.444444	0.317938	0.444444	ATF3	ENSG00000162772	Mongola	0.4	0.305556	0.4
Daur	chr1:212649295-212833618	212744370	rs12038766	0.444444	0.317938	0.444444	ATF3	ENSG00000162772	Naxi	0.5	0.45873	0.5
Daur	chr1:212649295-212833618	212744370	rs12038766	0.444444	0.317938	0.444444	ATF3	ENSG00000162772	PEL	0.417647	0.421541	0.511765
Daur	chr1:212649295-212833618	212744370	rs12038766	0.444444	0.317938	0.444444	ATF3	ENSG00000162772	Pima	0.464286	0.349207	0.571429
Daur	chr1:212649295-212833618	212744370	rs12038766	0.444444	0.317938	0.444444	ATF3	ENSG00000162772	Surui	0.75	0.75	0.75
Daur	chr1:212649295-212833618	212744370	rs12038766	0.444444	0.317938	0.444444	ATF3	ENSG00000162772	Tu	0.3125	0.200868	0.375
Daur	chr1:212649295-212833618	212744370	rs12038766	0.444444	0.317938	0.444444	ATF3	ENSG00000162772	Uygur	0.25	0.239943	0.25
Daur	chr1:212649295-212833618	212744370	rs12038766	0.444444	0.317938	0.444444	ATF3	ENSG00000162772	Xibo	0.277778	0.0918274	0.333333
Daur	chr1:212649295-212833618	212744370	rs12038766	0.444444	0.317938	0.444444	ATF3	ENSG00000162772	Yakut	0.26	0.272857	0.3
Daur	chr1:212649295-212833618	212747722	rs11119975	0.444444	0.317938	0.444444	ATF3	ENSG00000162772	CHB	0.427184	0.111005	0.446602
Daur	chr1:212649295-212833618	212747722	rs11119975	0.444444	0.317938	0.444444	ATF3	ENSG00000162772	CHS	0.404762	0.36853	0.428571
Daur	chr1:212649295-212833618	212747722	rs11119975	0.444444	0.317938	0.444444	ATF3	ENSG00000162772	Colombian	0.5	0.526157	0.642857
Daur	chr1:212649295-212833618	212747722	rs11119975	0.444444	0.317938	0.444444	ATF3	ENSG00000162772	Dai	0.277778	0.186806	0.277778
Daur	chr1:212649295-212833618	212747722	rs11119975	0.444444	0.317938	0.444444	ATF3	ENSG00000162772	Hezhen	0.388889	0.258454	0.388889
Daur	chr1:212649295-212833618	212747722	rs11119975	0.444444	0.317938	0.444444	ATF3	ENSG00000162772	JPT	0.27451	0.225703	0.284314
Daur	chr1:212649295-212833618	212747722	rs11119975	0.444444	0.317938	0.444444	ATF3	ENSG00000162772	Japanese	0.321429	0.233705	0.357143
Daur	chr1:212649295-212833618	212747722	rs11119975	0.444444	0.317938	0.444444	ATF3	ENSG00000162772	KHV	0.30303	0.284731	0.328283
Daur	chr1:212649295-212833618	212747722	rs11119975	0.444444	0.317938	0.444444	ATF3	ENSG00000162772	Karitiana	0.416667	0.328767	0.541667
Daur	chr1:212649295-212833618	212747722	rs11119975	0.444444	0.317938	0.444444	ATF3	ENSG00000162772	MXL	0.273438	0.245811	0.28125
Daur	chr1:212649295-212833618	212747722	rs11119975	0.444444	0.317938	0.444444	ATF3	ENSG00000162772	Maya	0.547619	0.540241	0.666667
Daur	chr1:212649295-212833618	212747722	rs11119975	0.444444	0.317938	0.444444	ATF3	ENSG00000162772	Miao	0.4	0.407627	0.45
Daur	chr1:212649295-212833618	212747722	rs11119975	0.444444	0.317938	0.444444	ATF3	ENSG00000162772	Mongola	0.4	0.305556	0.4
Daur	chr1:212649295-212833618	212747722	rs11119975	0.444444	0.317938	0.444444	ATF3	ENSG00000162772	Naxi	0.5	0.45873	0.5
Daur	chr1:212649295-212833618	212747722	rs11119975	0.444444	0.317938	0.444444	ATF3	ENSG00000162772	PEL	0.411765	0.421541	0.511765
Daur	chr1:212649295-212833618	212747722	rs11119975	0.444444	0.317938	0.444444	ATF3	ENSG00000162772	Pima	0.464286	0.349207	0.571429
Daur	chr1:212649295-212833618	212747722	rs11119975	0.444444	0.317938	0.444444	ATF3	ENSG00000162772	Surui	0.75	0.75	0.75
Daur	chr1:212649295-212833618	212747722	rs11119975	0.444444	0.317938	0.444444	ATF3	ENSG00000162772	Tu	0.3125	0.200868	0.375
Daur	chr1:212649295-212833618	212747722	rs11119975	0.444444	0.317938	0.444444	ATF3	ENSG00000162772	Xibo	0.277778	0.0918274	0.333333
Daur	chr1:212649295-212833618	212747722	rs11119975	0.444444	0.317938	0.444444	ATF3	ENSG00000162772	Yakut	0.26	0.272857	0.3
Daur	chr1:212649295-212833618	212758392	rs4951618	0.444444	0.317938	0.444444	ATF3	ENSG00000162772	CHB	0.354369	0.111005	0.446602
Daur	chr1:212649295-212833618	212758392	rs4951618	0.444444	0.317938	0.444444	ATF3	ENSG00000162772	CHS	0.380952	0.36853	0.428571
Daur	chr1:212649295-212833618	212758392	rs4951618	0.444444	0.317938	0.444444	ATF3	ENSG00000162772	Cambodian	0.3	0.276562	0.35
Daur	chr1:212649295-212833618	212758392	rs4951618	0.444444	0.317938	0.444444	ATF3	ENSG00000162772	Colombian	0.5	0.526157	0.642857
Daur	chr1:212649295-212833618	212758392	rs4951618	0.444444	0.317938	0.444444	ATF3	ENSG00000162772	Dai	0.277778	0.186806	0.277778
Daur	chr1:212649295-212833618	212758392	rs4951618	0.444444	0.317938	0.444444	ATF3	ENSG00000162772	Hezhen	0.277778	0.258454	0.388889
Daur	chr1:212649295-212833618	212758392	rs4951618	0.444444	0.317938	0.444444	ATF3	ENSG00000162772	JPT	0.254902	0.225703	0.284314
Daur	chr1:212649295-212833618	212758392	rs4951618	0.444444	0.317938	0.444444	ATF3	ENSG00000162772	Japanese	0.285714	0.233705	0.357143
Daur	chr1:212649295-212833618	212758392	rs4951618	0.444444	0.317938	0.444444	ATF3	ENSG00000162772	KHV	0.287879	0.284731	0.328283
Daur	chr1:212649295-212833618	212758392	rs4951618	0.444444	0.317938	0.444444	ATF3	ENSG00000162772	Karitiana	0.541667	0.328767	0.541667
Daur	chr1:212649295-212833618	212758392	rs4951618	0.444444	0.317938	0.444444	ATF3	ENSG00000162772	MXL	0.273438	0.245811	0.28125
Daur	chr1:212649295-212833618	212758392	rs4951618	0.444444	0.317938	0.444444	ATF3	ENSG00000162772	Maya	0.571429	0.540241	0.666667
Daur	chr1:212649295-212833618	212758392	rs4951618	0.444444	0.317938	0.444444	ATF3	ENSG00000162772	Miao	0.35	0.407627	0.45
Daur	chr1:212649295-212833618	212758392	rs4951618	0.444444	0.317938	0.444444	ATF3	ENSG00000162772	Mongola	0.35	0.305556	0.4
Daur	chr1:212649295-212833618	212758392	rs4951618	0.444444	0.317938	0.444444	ATF3	ENSG00000162772	Naxi	0.5	0.45873	0.5
Daur	chr1:212649295-212833618	212758392	rs4951618	0.444444	0.317938	0.444444	ATF3	ENSG00000162772	PEL	0.405882	0.421541	0.511765
Daur	chr1:212649295-212833618	212758392	rs4951618	0.444444	0.317938	0.444444	ATF3	ENSG00000162772	PUR	0.225962	0.169384	0.225962
Daur	chr1:212649295-212833618	212758392	rs4951618	0.444444	0.317938	0.444444	ATF3	ENSG00000162772	Pima	0.571429	0.349207	0.571429
Daur	chr1:212649295-212833618	212758392	rs4951618	0.444444	0.317938	0.444444	ATF3	ENSG00000162772	Surui	0.75	0.75	0.75
Daur	chr1:212649295-212833618	212758392	rs4951618	0.444444	0.317938	0.444444	ATF3	ENSG00000162772	Tu	0.3125	0.200868	0.375
Daur	chr1:212649295-212833618	212758392	rs4951618	0.444444	0.317938	0.444444	ATF3	ENSG00000162772	Xibo	0.222222	0.0918274	0.333333
Daur	chr1:212649295-212833618	212758392	rs4951618	0.444444	0.317938	0.444444	ATF3	ENSG00000162772	Yakut	0.26	0.272857	0.3
Daur	chr1:212649295-212833618	212759493	rs6674072	0.444444	0.317938	0.444444	ATF3	ENSG00000162772	CHB	0.334951	0.111005	0.446602
Daur	chr1:212649295-212833618	212759493	rs6674072	0.444444	0.317938	0.444444	ATF3	ENSG00000162772	CHS	0.371429	0.36853	0.428571
Daur	chr1:212649295-212833618	212759493	rs6674072	0.444444	0.317938	0.444444	ATF3	ENSG00000162772	Cambodian	0.25	0.276562	0.35
Daur	chr1:212649295-212833618	212759493	rs6674072	0.444444	0.317938	0.444444	ATF3	ENSG00000162772	Colombian	0.5	0.526157	0.642857
Daur	chr1:212649295-212833618	212759493	rs6674072	0.444444	0.317938	0.444444	ATF3	ENSG00000162772	Dai	0.277778	0.186806	0.277778
Daur	chr1:212649295-212833618	212759493	rs6674072	0.444444	0.317938	0.444444	ATF3	ENSG00000162772	Hezhen	0.277778	0.258454	0.388889
Daur	chr1:212649295-212833618	212759493	rs6674072	0.444444	0.317938	0.444444	ATF3	ENSG00000162772	JPT	0.254902	0.225703	0.284314
Daur	chr1:212649295-212833618	212759493	rs6674072	0.444444	0.317938	0.444444	ATF3	ENSG00000162772	Japanese	0.303571	0.233705	0.357143
Daur	chr1:212649295-212833618	212759493	rs6674072	0.444444	0.317938	0.444444	ATF3	ENSG00000162772	KHV	0.277778	0.284731	0.328283
Daur	chr1:212649295-212833618	212759493	rs6674072	0.444444	0.317938	0.444444	ATF3	ENSG00000162772	Karitiana	0.541667	0.328767	0.541667
Daur	chr1:212649295-212833618	212759493	rs6674072	0.444444	0.317938	0.444444	ATF3	ENSG00000162772	MXL	0.273438	0.245811	0.28125
Daur	chr1:212649295-212833618	212759493	rs6674072	0.444444	0.317938	0.444444	ATF3	ENSG00000162772	Maya	0.571429	0.540241	0.666667
Daur	chr1:212649295-212833618	212759493	rs6674072	0.444444	0.317938	0.444444	ATF3	ENSG00000162772	Miao	0.35	0.407627	0.45
Daur	chr1:212649295-212833618	212759493	rs6674072	0.444444	0.317938	0.444444	ATF3	ENSG00000162772	Mongola	0.35	0.305556	0.4
Daur	chr1:212649295-212833618	212759493	rs6674072	0.444444	0.317938	0.444444	ATF3	ENSG00000162772	Naxi	0.5	0.45873	0.5
Daur	chr1:212649295-212833618	212759493	rs6674072	0.444444	0.317938	0.444444	ATF3	ENSG00000162772	PEL	0.405882	0.421541	0.511765
Daur	chr1:212649295-212833618	212759493	rs6674072	0.444444	0.317938	0.444444	ATF3	ENSG00000162772	Pima	0.464286	0.349207	0.571429
Daur	chr1:212649295-212833618	212759493	rs6674072	0.444444	0.317938	0.444444	ATF3	ENSG00000162772	Surui	0.75	0.75	0.75
Daur	chr1:212649295-212833618	212759493	rs6674072	0.444444	0.317938	0.444444	ATF3	ENSG00000162772	Tu	0.25	0.200868	0.375
Daur	chr1:212649295-212833618	212759493	rs6674072	0.444444	0.317938	0.444444	ATF3	ENSG00000162772	Xibo	0.277778	0.0918274	0.333333
Daur	chr1:212649295-212833618	212759493	rs6674072	0.444444	0.317938	0.444444	ATF3	ENSG00000162772	Yakut	0.28	0.272857	0.3
CHB	chr1:212649295-213913134	212738835	rs3806460	0.427184	0.111005	0.446602	ENSG00000288007	ENSG00000288007	CHS	0.404762	0.36853	0.428571
CHB	chr1:212649295-213913134	212738835	rs3806460	0.427184	0.111005	0.446602	ENSG00000288007	ENSG00000288007	Cambodian	0.3	0.276562	0.35
CHB	chr1:212649295-213913134	212738835	rs3806460	0.427184	0.111005	0.446602	ENSG00000288007	ENSG00000288007	Colombian	0.5	0.526157	0.642857
CHB	chr1:212649295-213913134	212738835	rs3806460	0.427184	0.111005	0.446602	ENSG00000288007	ENSG00000288007	Dai	0.277778	0.186806	0.277778
CHB	chr1:212649295-213913134	212738835	rs3806460	0.427184	0.111005	0.446602	ENSG00000288007	ENSG00000288007	Daur	0.444444	0.317938	0.444444
CHB	chr1:212649295-213913134	212738835	rs3806460	0.427184	0.111005	0.446602	ENSG00000288007	ENSG00000288007	Hezhen	0.388889	0.258454	0.388889
CHB	chr1:212649295-213913134	212738835	rs3806460	0.427184	0.111005	0.446602	ENSG00000288007	ENSG00000288007	JPT	0.27451	0.225703	0.284314
CHB	chr1:212649295-213913134	212738835	rs3806460	0.427184	0.111005	0.446602	ENSG00000288007	ENSG00000288007	Japanese	0.339286	0.233705	0.357143
CHB	chr1:212649295-213913134	212738835	rs3806460	0.427184	0.111005	0.446602	ENSG00000288007	ENSG00000288007	KHV	0.30303	0.284731	0.328283
CHB	chr1:212649295-213913134	212738835	rs3806460	0.427184	0.111005	0.446602	ENSG00000288007	ENSG00000288007	Karitiana	0.416667	0.328767	0.541667
CHB	chr1:212649295-213913134	212738835	rs3806460	0.427184	0.111005	0.446602	ENSG00000288007	ENSG00000288007	MXL	0.28125	0.245811	0.28125
CHB	chr1:212649295-213913134	212738835	rs3806460	0.427184	0.111005	0.446602	ENSG00000288007	ENSG00000288007	Maya	0.547619	0.540241	0.666667
CHB	chr1:212649295-213913134	212738835	rs3806460	0.427184	0.111005	0.446602	ENSG00000288007	ENSG00000288007	Miao	0.4	0.407627	0.45
CHB	chr1:212649295-213913134	212738835	rs3806460	0.427184	0.111005	0.446602	ENSG00000288007	ENSG00000288007	Mongola	0.4	0.305556	0.4
CHB	chr1:212649295-213913134	212738835	rs3806460	0.427184	0.111005	0.446602	ENSG00000288007	ENSG00000288007	Naxi	0.5	0.45873	0.5
CHB	chr1:212649295-213913134	212738835	rs3806460	0.427184	0.111005	0.446602	ENSG00000288007	ENSG00000288007	PEL	0.417647	0.421541	0.511765
CHB	chr1:212649295-213913134	212738835	rs3806460	0.427184	0.111005	0.446602	ENSG00000288007	ENSG00000288007	Pima	0.464286	0.349207	0.571429
CHB	chr1:212649295-213913134	212738835	rs3806460	0.427184	0.111005	0.446602	ENSG00000288007	ENSG00000288007	Surui	0.75	0.75	0.75
CHB	chr1:212649295-213913134	212738835	rs3806460	0.427184	0.111005	0.446602	ENSG00000288007	ENSG00000288007	Tu	0.3125	0.200868	0.375
CHB	chr1:212649295-213913134	212738835	rs3806460	0.427184	0.111005	0.446602	ENSG00000288007	ENSG00000288007	Uygur	0.25	0.239943	0.25
CHB	chr1:212649295-213913134	212738835	rs3806460	0.427184	0.111005	0.446602	ENSG00000288007	ENSG00000288007	Xibo	0.277778	0.0918274	0.333333
CHB	chr1:212649295-213913134	212738835	rs3806460	0.427184	0.111005	0.446602	ENSG00000288007	ENSG00000288007	Yakut	0.26	0.272857	0.3
CHB	chr1:212649295-213913134	212741763	rs11119974	0.427184	0.111005	0.446602	ATF3	ENSG00000162772	CHS	0.404762	0.36853	0.428571
CHB	chr1:212649295-213913134	212741763	rs11119974	0.427184	0.111005	0.446602	ATF3	ENSG00000162772	Cambodian	0.3	0.276562	0.35
CHB	chr1:212649295-213913134	212741763	rs11119974	0.427184	0.111005	0.446602	ATF3	ENSG00000162772	Colombian	0.5	0.526157	0.642857
CHB	chr1:212649295-213913134	212741763	rs11119974	0.427184	0.111005	0.446602	ATF3	ENSG00000162772	Dai	0.277778	0.186806	0.277778
CHB	chr1:212649295-213913134	212741763	rs11119974	0.427184	0.111005	0.446602	ATF3	ENSG00000162772	Daur	0.444444	0.317938	0.444444
CHB	chr1:212649295-213913134	212741763	rs11119974	0.427184	0.111005	0.446602	ATF3	ENSG00000162772	Hezhen	0.388889	0.258454	0.388889
CHB	chr1:212649295-213913134	212741763	rs11119974	0.427184	0.111005	0.446602	ATF3	ENSG00000162772	JPT	0.27451	0.225703	0.284314
CHB	chr1:212649295-213913134	212741763	rs11119974	0.427184	0.111005	0.446602	ATF3	ENSG00000162772	Japanese	0.339286	0.233705	0.357143
CHB	chr1:212649295-213913134	212741763	rs11119974	0.427184	0.111005	0.446602	ATF3	ENSG00000162772	KHV	0.30303	0.284731	0.328283
CHB	chr1:212649295-213913134	212741763	rs11119974	0.427184	0.111005	0.446602	ATF3	ENSG00000162772	Karitiana	0.416667	0.328767	0.541667
CHB	chr1:212649295-213913134	212741763	rs11119974	0.427184	0.111005	0.446602	ATF3	ENSG00000162772	MXL	0.28125	0.245811	0.28125
CHB	chr1:212649295-213913134	212741763	rs11119974	0.427184	0.111005	0.446602	ATF3	ENSG00000162772	Maya	0.547619	0.540241	0.666667
CHB	chr1:212649295-213913134	212741763	rs11119974	0.427184	0.111005	0.446602	ATF3	ENSG00000162772	Miao	0.4	0.407627	0.45
CHB	chr1:212649295-213913134	212741763	rs11119974	0.427184	0.111005	0.446602	ATF3	ENSG00000162772	Mongola	0.4	0.305556	0.4
CHB	chr1:212649295-213913134	212741763	rs11119974	0.427184	0.111005	0.446602	ATF3	ENSG00000162772	Naxi	0.5	0.45873	0.5
CHB	chr1:212649295-213913134	212741763	rs11119974	0.427184	0.111005	0.446602	ATF3	ENSG00000162772	PEL	0.417647	0.421541	0.511765
CHB	chr1:212649295-213913134	212741763	rs11119974	0.427184	0.111005	0.446602	ATF3	ENSG00000162772	Pima	0.464286	0.349207	0.571429
CHB	chr1:212649295-213913134	212741763	rs11119974	0.427184	0.111005	0.446602	ATF3	ENSG00000162772	Surui	0.75	0.75	0.75
CHB	chr1:212649295-213913134	212741763	rs11119974	0.427184	0.111005	0.446602	ATF3	ENSG00000162772	Tu	0.3125	0.200868	0.375
CHB	chr1:212649295-213913134	212741763	rs11119974	0.427184	0.111005	0.446602	ATF3	ENSG00000162772	Uygur	0.25	0.239943	0.25
CHB	chr1:212649295-213913134	212741763	rs11119974	0.427184	0.111005	0.446602	ATF3	ENSG00000162772	Xibo	0.277778	0.0918274	0.333333
CHB	chr1:212649295-213913134	212741763	rs11119974	0.427184	0.111005	0.446602	ATF3	ENSG00000162772	Yakut	0.26	0.272857	0.3
CHB	chr1:212649295-213913134	212742400	rs10863980	0.427184	0.111005	0.446602	ATF3	ENSG00000162772	CHS	0.404762	0.36853	0.428571
CHB	chr1:212649295-213913134	212742400	rs10863980	0.427184	0.111005	0.446602	ATF3	ENSG00000162772	Cambodian	0.3	0.276562	0.35
CHB	chr1:212649295-213913134	212742400	rs10863980	0.427184	0.111005	0.446602	ATF3	ENSG00000162772	Colombian	0.5	0.526157	0.642857
CHB	chr1:212649295-213913134	212742400	rs10863980	0.427184	0.111005	0.446602	ATF3	ENSG00000162772	Dai	0.277778	0.186806	0.277778
CHB	chr1:212649295-213913134	212742400	rs10863980	0.427184	0.111005	0.446602	ATF3	ENSG00000162772	Daur	0.444444	0.317938	0.444444
CHB	chr1:212649295-213913134	212742400	rs10863980	0.427184	0.111005	0.446602	ATF3	ENSG00000162772	Hezhen	0.388889	0.258454	0.388889
CHB	chr1:212649295-213913134	212742400	rs10863980	0.427184	0.111005	0.446602	ATF3	ENSG00000162772	JPT	0.27451	0.225703	0.284314
CHB	chr1:212649295-213913134	212742400	rs10863980	0.427184	0.111005	0.446602	ATF3	ENSG00000162772	Japanese	0.339286	0.233705	0.357143
CHB	chr1:212649295-213913134	212742400	rs10863980	0.427184	0.111005	0.446602	ATF3	ENSG00000162772	KHV	0.30303	0.284731	0.328283
CHB	chr1:212649295-213913134	212742400	rs10863980	0.427184	0.111005	0.446602	ATF3	ENSG00000162772	Karitiana	0.416667	0.328767	0.541667
CHB	chr1:212649295-213913134	212742400	rs10863980	0.427184	0.111005	0.446602	ATF3	ENSG00000162772	MXL	0.28125	0.245811	0.28125
CHB	chr1:212649295-213913134	212742400	rs10863980	0.427184	0.111005	0.446602	ATF3	ENSG00000162772	Maya	0.547619	0.540241	0.666667
CHB	chr1:212649295-213913134	212742400	rs10863980	0.427184	0.111005	0.446602	ATF3	ENSG00000162772	Miao	0.4	0.407627	0.45
CHB	chr1:212649295-213913134	212742400	rs10863980	0.427184	0.111005	0.446602	ATF3	ENSG00000162772	Mongola	0.4	0.305556	0.4
CHB	chr1:212649295-213913134	212742400	rs10863980	0.427184	0.111005	0.446602	ATF3	ENSG00000162772	Naxi	0.5	0.45873	0.5
CHB	chr1:212649295-213913134	212742400	rs10863980	0.427184	0.111005	0.446602	ATF3	ENSG00000162772	PEL	0.417647	0.421541	0.511765
CHB	chr1:212649295-213913134	212742400	rs10863980	0.427184	0.111005	0.446602	ATF3	ENSG00000162772	Pima	0.464286	0.349207	0.571429
CHB	chr1:212649295-213913134	212742400	rs10863980	0.427184	0.111005	0.446602	ATF3	ENSG00000162772	Surui	0.75	0.75	0.75
CHB	chr1:212649295-213913134	212742400	rs10863980	0.427184	0.111005	0.446602	ATF3	ENSG00000162772	Tu	0.3125	0.200868	0.375
CHB	chr1:212649295-213913134	212742400	rs10863980	0.427184	0.111005	0.446602	ATF3	ENSG00000162772	Uygur	0.25	0.239943	0.25
CHB	chr1:212649295-213913134	212742400	rs10863980	0.427184	0.111005	0.446602	ATF3	ENSG00000162772	Xibo	0.277778	0.0918274	0.333333
CHB	chr1:212649295-213913134	212742400	rs10863980	0.427184	0.111005	0.446602	ATF3	ENSG00000162772	Yakut	0.26	0.272857	0.3
CHB	chr1:212649295-213913134	212742675	rs4951613	0.427184	0.111005	0.446602	ATF3	ENSG00000162772	CHS	0.404762	0.36853	0.428571
CHB	chr1:212649295-213913134	212742675	rs4951613	0.427184	0.111005	0.446602	ATF3	ENSG00000162772	Cambodian	0.3	0.276562	0.35
CHB	chr1:212649295-213913134	212742675	rs4951613	0.427184	0.111005	0.446602	ATF3	ENSG00000162772	Colombian	0.5	0.526157	0.642857
CHB	chr1:212649295-213913134	212742675	rs4951613	0.427184	0.111005	0.446602	ATF3	ENSG00000162772	Dai	0.277778	0.186806	0.277778
CHB	chr1:212649295-213913134	212742675	rs4951613	0.427184	0.111005	0.446602	ATF3	ENSG00000162772	Daur	0.444444	0.317938	0.444444
CHB	chr1:212649295-213913134	212742675	rs4951613	0.427184	0.111005	0.446602	ATF3	ENSG00000162772	Hezhen	0.388889	0.258454	0.388889
CHB	chr1:212649295-213913134	212742675	rs4951613	0.427184	0.111005	0.446602	ATF3	ENSG00000162772	JPT	0.27451	0.225703	0.284314
CHB	chr1:212649295-213913134	212742675	rs4951613	0.427184	0.111005	0.446602	ATF3	ENSG00000162772	Japanese	0.339286	0.233705	0.357143
CHB	chr1:212649295-213913134	212742675	rs4951613	0.427184	0.111005	0.446602	ATF3	ENSG00000162772	KHV	0.30303	0.284731	0.328283
CHB	chr1:212649295-213913134	212742675	rs4951613	0.427184	0.111005	0.446602	ATF3	ENSG00000162772	Karitiana	0.416667	0.328767	0.541667
CHB	chr1:212649295-213913134	212742675	rs4951613	0.427184	0.111005	0.446602	ATF3	ENSG00000162772	MXL	0.28125	0.245811	0.28125
CHB	chr1:212649295-213913134	212742675	rs4951613	0.427184	0.111005	0.446602	ATF3	ENSG00000162772	Maya	0.547619	0.540241	0.666667
CHB	chr1:212649295-213913134	212742675	rs4951613	0.427184	0.111005	0.446602	ATF3	ENSG00000162772	Miao	0.4	0.407627	0.45
CHB	chr1:212649295-213913134	212742675	rs4951613	0.427184	0.111005	0.446602	ATF3	ENSG00000162772	Mongola	0.4	0.305556	0.4
CHB	chr1:212649295-213913134	212742675	rs4951613	0.427184	0.111005	0.446602	ATF3	ENSG00000162772	Naxi	0.5	0.45873	0.5
CHB	chr1:212649295-213913134	212742675	rs4951613	0.427184	0.111005	0.446602	ATF3	ENSG00000162772	PEL	0.417647	0.421541	0.511765
CHB	chr1:212649295-213913134	212742675	rs4951613	0.427184	0.111005	0.446602	ATF3	ENSG00000162772	Pima	0.464286	0.349207	0.571429
CHB	chr1:212649295-213913134	212742675	rs4951613	0.427184	0.111005	0.446602	ATF3	ENSG00000162772	Surui	0.75	0.75	0.75
CHB	chr1:212649295-213913134	212742675	rs4951613	0.427184	0.111005	0.446602	ATF3	ENSG00000162772	Tu	0.3125	0.200868	0.375
CHB	chr1:212649295-213913134	212742675	rs4951613	0.427184	0.111005	0.446602	ATF3	ENSG00000162772	Uygur	0.25	0.239943	0.25
CHB	chr1:212649295-213913134	212742675	rs4951613	0.427184	0.111005	0.446602	ATF3	ENSG00000162772	Xibo	0.277778	0.0918274	0.333333
CHB	chr1:212649295-213913134	212742675	rs4951613	0.427184	0.111005	0.446602	ATF3	ENSG00000162772	Yakut	0.26	0.272857	0.3
CHB	chr1:212649295-213913134	212744370	rs12038766	0.427184	0.111005	0.446602	ATF3	ENSG00000162772	CHS	0.404762	0.36853	0.428571
CHB	chr1:212649295-213913134	212744370	rs12038766	0.427184	0.111005	0.446602	ATF3	ENSG00000162772	Colombian	0.5	0.526157	0.642857
CHB	chr1:212649295-213913134	212744370	rs12038766	0.427184	0.111005	0.446602	ATF3	ENSG00000162772	Dai	0.277778	0.186806	0.277778
CHB	chr1:212649295-213913134	212744370	rs12038766	0.427184	0.111005	0.446602	ATF3	ENSG00000162772	Daur	0.444444	0.317938	0.444444
CHB	chr1:212649295-213913134	212744370	rs12038766	0.427184	0.111005	0.446602	ATF3	ENSG00000162772	Hezhen	0.388889	0.258454	0.388889
CHB	chr1:212649295-213913134	212744370	rs12038766	0.427184	0.111005	0.446602	ATF3	ENSG00000162772	JPT	0.27451	0.225703	0.284314
CHB	chr1:212649295-213913134	212744370	rs12038766	0.427184	0.111005	0.446602	ATF3	ENSG00000162772	Japanese	0.339286	0.233705	0.357143
CHB	chr1:212649295-213913134	212744370	rs12038766	0.427184	0.111005	0.446602	ATF3	ENSG00000162772	KHV	0.30303	0.284731	0.328283
CHB	chr1:212649295-213913134	212744370	rs12038766	0.427184	0.111005	0.446602	ATF3	ENSG00000162772	Karitiana	0.416667	0.328767	0.541667
CHB	chr1:212649295-213913134	212744370	rs12038766	0.427184	0.111005	0.446602	ATF3	ENSG00000162772	MXL	0.28125	0.245811	0.28125
CHB	chr1:212649295-213913134	212744370	rs12038766	0.427184	0.111005	0.446602	ATF3	ENSG00000162772	Miao	0.4	0.407627	0.45
CHB	chr1:212649295-213913134	212744370	rs12038766	0.427184	0.111005	0.446602	ATF3	ENSG00000162772	Mongola	0.4	0.305556	0.4
CHB	chr1:212649295-213913134	212744370	rs12038766	0.427184	0.111005	0.446602	ATF3	ENSG00000162772	Naxi	0.5	0.45873	0.5
CHB	chr1:212649295-213913134	212744370	rs12038766	0.427184	0.111005	0.446602	ATF3	ENSG00000162772	PEL	0.417647	0.421541	0.511765
CHB	chr1:212649295-213913134	212744370	rs12038766	0.427184	0.111005	0.446602	ATF3	ENSG00000162772	Pima	0.464286	0.349207	0.571429
CHB	chr1:212649295-213913134	212744370	rs12038766	0.427184	0.111005	0.446602	ATF3	ENSG00000162772	Surui	0.75	0.75	0.75
CHB	chr1:212649295-213913134	212744370	rs12038766	0.427184	0.111005	0.446602	ATF3	ENSG00000162772	Tu	0.3125	0.200868	0.375
CHB	chr1:212649295-213913134	212744370	rs12038766	0.427184	0.111005	0.446602	ATF3	ENSG00000162772	Uygur	0.25	0.239943	0.25
CHB	chr1:212649295-213913134	212744370	rs12038766	0.427184	0.111005	0.446602	ATF3	ENSG00000162772	Xibo	0.277778	0.0918274	0.333333
CHB	chr1:212649295-213913134	212744370	rs12038766	0.427184	0.111005	0.446602	ATF3	ENSG00000162772	Yakut	0.26	0.272857	0.3
CHB	chr1:212649295-213913134	212747722	rs11119975	0.427184	0.111005	0.446602	ATF3	ENSG00000162772	CHS	0.404762	0.36853	0.428571
CHB	chr1:212649295-213913134	212747722	rs11119975	0.427184	0.111005	0.446602	ATF3	ENSG00000162772	Colombian	0.5	0.526157	0.642857
CHB	chr1:212649295-213913134	212747722	rs11119975	0.427184	0.111005	0.446602	ATF3	ENSG00000162772	Dai	0.277778	0.186806	0.277778
CHB	chr1:212649295-213913134	212747722	rs11119975	0.427184	0.111005	0.446602	ATF3	ENSG00000162772	Daur	0.444444	0.317938	0.444444
CHB	chr1:212649295-213913134	212747722	rs11119975	0.427184	0.111005	0.446602	ATF3	ENSG00000162772	Hezhen	0.388889	0.258454	0.388889
CHB	chr1:212649295-213913134	212747722	rs11119975	0.427184	0.111005	0.446602	ATF3	ENSG00000162772	JPT	0.27451	0.225703	0.284314
CHB	chr1:212649295-213913134	212747722	rs11119975	0.427184	0.111005	0.446602	ATF3	ENSG00000162772	Japanese	0.321429	0.233705	0.357143
CHB	chr1:212649295-213913134	212747722	rs11119975	0.427184	0.111005	0.446602	ATF3	ENSG00000162772	KHV	0.30303	0.284731	0.328283
CHB	chr1:212649295-213913134	212747722	rs11119975	0.427184	0.111005	0.446602	ATF3	ENSG00000162772	Karitiana	0.416667	0.328767	0.541667
CHB	chr1:212649295-213913134	212747722	rs11119975	0.427184	0.111005	0.446602	ATF3	ENSG00000162772	MXL	0.273438	0.245811	0.28125
CHB	chr1:212649295-213913134	212747722	rs11119975	0.427184	0.111005	0.446602	ATF3	ENSG00000162772	Maya	0.547619	0.540241	0.666667
CHB	chr1:212649295-213913134	212747722	rs11119975	0.427184	0.111005	0.446602	ATF3	ENSG00000162772	Miao	0.4	0.407627	0.45
CHB	chr1:212649295-213913134	212747722	rs11119975	0.427184	0.111005	0.446602	ATF3	ENSG00000162772	Mongola	0.4	0.305556	0.4
CHB	chr1:212649295-213913134	212747722	rs11119975	0.427184	0.111005	0.446602	ATF3	ENSG00000162772	Naxi	0.5	0.45873	0.5
CHB	chr1:212649295-213913134	212747722	rs11119975	0.427184	0.111005	0.446602	ATF3	ENSG00000162772	PEL	0.411765	0.421541	0.511765
CHB	chr1:212649295-213913134	212747722	rs11119975	0.427184	0.111005	0.446602	ATF3	ENSG00000162772	Pima	0.464286	0.349207	0.571429
CHB	chr1:212649295-213913134	212747722	rs11119975	0.427184	0.111005	0.446602	ATF3	ENSG00000162772	Surui	0.75	0.75	0.75
CHB	chr1:212649295-213913134	212747722	rs11119975	0.427184	0.111005	0.446602	ATF3	ENSG00000162772	Tu	0.3125	0.200868	0.375
CHB	chr1:212649295-213913134	212747722	rs11119975	0.427184	0.111005	0.446602	ATF3	ENSG00000162772	Xibo	0.277778	0.0918274	0.333333
CHB	chr1:212649295-213913134	212747722	rs11119975	0.427184	0.111005	0.446602	ATF3	ENSG00000162772	Yakut	0.26	0.272857	0.3
Papuan	chr1:85419324-87128799	85905832	rs78464893	0.617647	0.261163	0.647059	Y_RNA	ENSG00000199459	Dai	0.333333	0.270983	0.333333
Papuan	chr1:85419324-87128799	85905832	rs78464893	0.617647	0.261163	0.647059	Y_RNA	ENSG00000199459	Miao	0.25	0.239744	0.3
Papuan	chr1:85419324-87128799	85905832	rs78464893	0.617647	0.261163	0.647059	Y_RNA	ENSG00000199459	Tu	0.25	0.109416	0.25
Papuan	chr1:85419324-87128799	85918896	rs77138894	0.617647	0.261163	0.647059	DDAH1	ENSG00000153904	Dai	0.333333	0.270983	0.333333
Papuan	chr1:85419324-87128799	85918896	rs77138894	0.617647	0.261163	0.647059	DDAH1	ENSG00000153904	Miao	0.25	0.239744	0.3
Papuan	chr1:85419324-87128799	85918896	rs77138894	0.617647	0.261163	0.647059	DDAH1	ENSG00000153904	Tu	0.25	0.109416	0.25
Papuan	chr1:85419324-87128799	85920575	rs75766273	0.617647	0.261163	0.647059	DDAH1	ENSG00000153904	Dai	0.333333	0.270983	0.333333
Papuan	chr1:85419324-87128799	85920575	rs75766273	0.617647	0.261163	0.647059	DDAH1	ENSG00000153904	Miao	0.25	0.239744	0.3
Papuan	chr1:85419324-87128799	85920575	rs75766273	0.617647	0.261163	0.647059	DDAH1	ENSG00000153904	Tu	0.25	0.109416	0.25
Papuan	chr1:85419324-87128799	85920641	rs74925591	0.617647	0.261163	0.647059	DDAH1	ENSG00000153904	Dai	0.333333	0.270983	0.333333
Papuan	chr1:85419324-87128799	85920641	rs74925591	0.617647	0.261163	0.647059	DDAH1	ENSG00000153904	Miao	0.25	0.239744	0.3
Papuan	chr1:85419324-87128799	85920641	rs74925591	0.617647	0.261163	0.647059	DDAH1	ENSG00000153904	Tu	0.25	0.109416	0.25
Papuan	chr1:85419324-87128799	85924906	rs74712609	0.617647	0.261163	0.647059	DDAH1	ENSG00000153904	Dai	0.277778	0.270983	0.333333
Papuan	chr1:85419324-87128799	85924906	rs74712609	0.617647	0.261163	0.647059	DDAH1	ENSG00000153904	Miao	0.25	0.239744	0.3
Papuan	chr1:85419324-87128799	85924906	rs74712609	0.617647	0.261163	0.647059	DDAH1	ENSG00000153904	Tu	0.25	0.109416	0.25
Papuan	chr1:85419324-87128799	85927267	rs12021849	0.617647	0.261163	0.647059	DDAH1	ENSG00000153904	Dai	0.277778	0.270983	0.333333
Papuan	chr1:85419324-87128799	85927267	rs12021849	0.617647	0.261163	0.647059	DDAH1	ENSG00000153904	Miao	0.25	0.239744	0.3
Papuan	chr1:85419324-87128799	85927267	rs12021849	0.617647	0.261163	0.647059	DDAH1	ENSG00000153904	Tu	0.25	0.109416	0.25
Papuan	chr1:85419324-87128799	85928588	rs12033315	0.617647	0.261163	0.647059	ENSG00000273264	ENSG00000273264	Dai	0.277778	0.270983	0.333333
Papuan	chr1:85419324-87128799	85928588	rs12033315	0.617647	0.261163	0.647059	ENSG00000273264	ENSG00000273264	Miao	0.25	0.239744	0.3
Papuan	chr1:85419324-87128799	85928588	rs12033315	0.617647	0.261163	0.647059	ENSG00000273264	ENSG00000273264	Tu	0.25	0.109416	0.25
Papuan	chr1:85419324-87128799	85928697	rs77834831	0.617647	0.261163	0.647059	ENSG00000273264	ENSG00000273264	Dai	0.277778	0.270983	0.333333
Papuan	chr1:85419324-87128799	85928697	rs77834831	0.617647	0.261163	0.647059	ENSG00000273264	ENSG00000273264	Miao	0.25	0.239744	0.3
Papuan	chr1:85419324-87128799	85928697	rs77834831	0.617647	0.261163	0.647059	ENSG00000273264	ENSG00000273264	Tu	0.25	0.109416	0.25
Papuan	chr1:85419324-87128799	85889500	rs12029684	0.588235	0.261163	0.647059	DDAH1	ENSG00000153904	Dai	0.333333	0.270983	0.333333
Papuan	chr1:85419324-87128799	85889500	rs12029684	0.588235	0.261163	0.647059	DDAH1	ENSG00000153904	Miao	0.25	0.239744	0.3
Papuan	chr1:85419324-87128799	85889500	rs12029684	0.588235	0.261163	0.647059	DDAH1	ENSG00000153904	Tu	0.25	0.109416	0.25
Papuan	chr1:85419324-87128799	85898964	rs12034206	0.588235	0.261163	0.647059	Y_RNA	ENSG00000199459	Dai	0.333333	0.270983	0.333333
Papuan	chr1:85419324-87128799	85898964	rs12034206	0.588235	0.261163	0.647059	Y_RNA	ENSG00000199459	Miao	0.25	0.239744	0.3
Papuan	chr1:85419324-87128799	85898964	rs12034206	0.588235	0.261163	0.647059	Y_RNA	ENSG00000199459	Tu	0.25	0.109416	0.25
Lahu	chr1:85559396-85857202	85793863	rs12029474	0.5	0.4375	0.5625	DDAH1	ENSG00000153904	Dai	0.277778	0.270983	0.333333
Lahu	chr1:85559396-85857202	85793863	rs12029474	0.5	0.4375	0.5625	DDAH1	ENSG00000153904	Miao	0.2	0.239744	0.3
Lahu	chr1:85559396-85857202	85793863	rs12029474	0.5	0.4375	0.5625	DDAH1	ENSG00000153904	Papuan	0.323529	0.261163	0.647059
Lahu	chr1:85559396-85857202	85794011	rs12047220	0.5	0.4375	0.5625	DDAH1	ENSG00000153904	Dai	0.277778	0.270983	0.333333
Lahu	chr1:85559396-85857202	85794011	rs12047220	0.5	0.4375	0.5625	DDAH1	ENSG00000153904	Miao	0.2	0.239744	0.3
Lahu	chr1:85559396-85857202	85797852	rs12033473	0.5	0.4375	0.5625	DDAH1	ENSG00000153904	Dai	0.277778	0.270983	0.333333
Lahu	chr1:85559396-85857202	85797852	rs12033473	0.5	0.4375	0.5625	DDAH1	ENSG00000153904	Miao	0.2	0.239744	0.3
Lahu	chr1:85559396-85857202	85797852	rs12033473	0.5	0.4375	0.5625	DDAH1	ENSG00000153904	Papuan	0.323529	0.261163	0.647059
Lahu	chr1:85559396-85857202	85799779	rs58489234	0.5	0.4375	0.5625	DDAH1	ENSG00000153904	Dai	0.277778	0.270983	0.333333
Lahu	chr1:85559396-85857202	85799779	rs58489234	0.5	0.4375	0.5625	DDAH1	ENSG00000153904	Miao	0.2	0.239744	0.3
Lahu	chr1:85559396-85857202	85809126	rs12039188	0.5	0.4375	0.5625	DDAH1	ENSG00000153904	Dai	0.277778	0.270983	0.333333
Lahu	chr1:85559396-85857202	85809126	rs12039188	0.5	0.4375	0.5625	DDAH1	ENSG00000153904	Miao	0.2	0.239744	0.3
Lahu	chr1:85559396-85857202	85809126	rs12039188	0.5	0.4375	0.5625	DDAH1	ENSG00000153904	Papuan	0.323529	0.261163	0.647059
Lahu	chr1:85559396-85857202	85810736	rs77318698	0.5	0.4375	0.5625	DDAH1	ENSG00000153904	Dai	0.277778	0.270983	0.333333
Lahu	chr1:85559396-85857202	85810736	rs77318698	0.5	0.4375	0.5625	DDAH1	ENSG00000153904	Miao	0.2	0.239744	0.3
Lahu	chr1:85559396-85857202	85810736	rs77318698	0.5	0.4375	0.5625	DDAH1	ENSG00000153904	Papuan	0.323529	0.261163	0.647059
Lahu	chr1:85559396-85857202	85830127	rs79727624	0.5	0.4375	0.5625	DDAH1	ENSG00000153904	Dai	0.277778	0.270983	0.333333
Lahu	chr1:85559396-85857202	85834049	rs12041140	0.5	0.4375	0.5625	DDAH1	ENSG00000153904	Dai	0.277778	0.270983	0.333333
Lahu	chr1:85559396-85857202	85834049	rs12041140	0.5	0.4375	0.5625	DDAH1	ENSG00000153904	Miao	0.25	0.239744	0.3
Lahu	chr1:85559396-85857202	85834049	rs12041140	0.5	0.4375	0.5625	DDAH1	ENSG00000153904	Papuan	0.323529	0.261163	0.647059
Lahu	chr1:85559396-85857202	85847637	rs80145075	0.5	0.4375	0.5625	DDAH1	ENSG00000153904	Dai	0.333333	0.270983	0.333333
Lahu	chr1:85559396-85857202	85847637	rs80145075	0.5	0.4375	0.5625	DDAH1	ENSG00000153904	Miao	0.25	0.239744	0.3
Lahu	chr1:85559396-85857202	85847637	rs80145075	0.5	0.4375	0.5625	DDAH1	ENSG00000153904	Tu	0.25	0.109416	0.25
Lahu	chr1:85559396-85857202	85857202	rs78550856	0.5	0.4375	0.5625	DDAH1	ENSG00000153904	Dai	0.333333	0.270983	0.333333
Lahu	chr1:85559396-85857202	85857202	rs78550856	0.5	0.4375	0.5625	DDAH1	ENSG00000153904	Miao	0.25	0.239744	0.3
Lahu	chr1:85559396-85857202	85857202	rs78550856	0.5	0.4375	0.5625	DDAH1	ENSG00000153904	Tu	0.25	0.109416	0.25
She	chr10:121282059-121711911	121652694	rs34042360	0.4	0.280435	0.4	MCMBP	ENSG00000197771	Burusho	0.25	0.15125	0.291667
She	chr10:121282059-121711911	121652694	rs34042360	0.4	0.280435	0.4	MCMBP	ENSG00000197771	Kalash	0.391304	0.251995	0.391304
She	chr10:121282059-121711911	121652694	rs34042360	0.4	0.280435	0.4	MCMBP	ENSG00000197771	Pathan	0.229167	0.153863	0.416667
She	chr10:121282059-121711911	121652694	rs34042360	0.4	0.280435	0.4	MCMBP	ENSG00000197771	Sindhi	0.217391	0.155291	0.391304
She	chr10:121282059-121711911	121656067	rs35225459	0.4	0.280435	0.4	MCMBP	ENSG00000197771	Kalash	0.391304	0.251995	0.391304
She	chr10:121282059-121711911	121657558	rs12761158	0.4	0.280435	0.4	SEC23IP	ENSG00000107651	BEB	0.337209	0.175637	0.360465
She	chr10:121282059-121711911	121657558	rs12761158	0.4	0.280435	0.4	SEC23IP	ENSG00000107651	Burusho	0.25	0.15125	0.291667
She	chr10:121282059-121711911	121657558	rs12761158	0.4	0.280435	0.4	SEC23IP	ENSG00000107651	GIH	0.315534	0.165339	0.34466
She	chr10:121282059-121711911	121657558	rs12761158	0.4	0.280435	0.4	SEC23IP	ENSG00000107651	ITU	0.331683	0.182424	0.336634
She	chr10:121282059-121711911	121657558	rs12761158	0.4	0.280435	0.4	SEC23IP	ENSG00000107651	Kalash	0.391304	0.251995	0.391304
She	chr10:121282059-121711911	121657558	rs12761158	0.4	0.280435	0.4	SEC23IP	ENSG00000107651	PJL	0.310526	0.174079	0.326316
She	chr10:121282059-121711911	121657558	rs12761158	0.4	0.280435	0.4	SEC23IP	ENSG00000107651	Pathan	0.229167	0.153863	0.416667
She	chr10:121282059-121711911	121657558	rs12761158	0.4	0.280435	0.4	SEC23IP	ENSG00000107651	STU	0.289216	0.163714	0.367647
She	chr10:121282059-121711911	121657558	rs12761158	0.4	0.280435	0.4	SEC23IP	ENSG00000107651	Sindhi	0.217391	0.155291	0.391304
She	chr10:121282059-121711911	121659077	rs35019752	0.4	0.280435	0.4	SEC23IP	ENSG00000107651	BEB	0.337209	0.175637	0.360465
She	chr10:121282059-121711911	121659077	rs35019752	0.4	0.280435	0.4	SEC23IP	ENSG00000107651	Burusho	0.25	0.15125	0.291667
She	chr10:121282059-121711911	121659077	rs35019752	0.4	0.280435	0.4	SEC23IP	ENSG00000107651	GIH	0.315534	0.165339	0.34466
She	chr10:121282059-121711911	121659077	rs35019752	0.4	0.280435	0.4	SEC23IP	ENSG00000107651	ITU	0.331683	0.182424	0.336634
She	chr10:121282059-121711911	121659077	rs35019752	0.4	0.280435	0.4	SEC23IP	ENSG00000107651	Kalash	0.391304	0.251995	0.391304
She	chr10:121282059-121711911	121659077	rs35019752	0.4	0.280435	0.4	SEC23IP	ENSG00000107651	PJL	0.310526	0.174079	0.326316
She	chr10:121282059-121711911	121659077	rs35019752	0.4	0.280435	0.4	SEC23IP	ENSG00000107651	Pathan	0.229167	0.153863	0.416667
She	chr10:121282059-121711911	121659077	rs35019752	0.4	0.280435	0.4	SEC23IP	ENSG00000107651	STU	0.289216	0.163714	0.367647
She	chr10:121282059-121711911	121659077	rs35019752	0.4	0.280435	0.4	SEC23IP	ENSG00000107651	Sindhi	0.217391	0.155291	0.391304
She	chr10:121282059-121711911	121659612	rs34038604	0.4	0.280435	0.4	SEC23IP	ENSG00000107651	BEB	0.337209	0.175637	0.360465
She	chr10:121282059-121711911	121659612	rs34038604	0.4	0.280435	0.4	SEC23IP	ENSG00000107651	Burusho	0.25	0.15125	0.291667
She	chr10:121282059-121711911	121659612	rs34038604	0.4	0.280435	0.4	SEC23IP	ENSG00000107651	GIH	0.315534	0.165339	0.34466
She	chr10:121282059-121711911	121659612	rs34038604	0.4	0.280435	0.4	SEC23IP	ENSG00000107651	ITU	0.331683	0.182424	0.336634
She	chr10:121282059-121711911	121659612	rs34038604	0.4	0.280435	0.4	SEC23IP	ENSG00000107651	Kalash	0.391304	0.251995	0.391304
She	chr10:121282059-121711911	121659612	rs34038604	0.4	0.280435	0.4	SEC23IP	ENSG00000107651	PJL	0.310526	0.174079	0.326316
She	chr10:121282059-121711911	121659612	rs34038604	0.4	0.280435	0.4	SEC23IP	ENSG00000107651	Pathan	0.229167	0.153863	0.416667
She	chr10:121282059-121711911	121659612	rs34038604	0.4	0.280435	0.4	SEC23IP	ENSG00000107651	STU	0.289216	0.163714	0.367647
She	chr10:121282059-121711911	121659612	rs34038604	0.4	0.280435	0.4	SEC23IP	ENSG00000107651	Sindhi	0.217391	0.155291	0.391304
She	chr10:121282059-121711911	121659707	rs71482899	0.4	0.280435	0.4	SEC23IP	ENSG00000107651	BEB	0.337209	0.175637	0.360465
She	chr10:121282059-121711911	121659707	rs71482899	0.4	0.280435	0.4	SEC23IP	ENSG00000107651	Burusho	0.25	0.15125	0.291667
She	chr10:121282059-121711911	121659707	rs71482899	0.4	0.280435	0.4	SEC23IP	ENSG00000107651	GIH	0.315534	0.165339	0.34466
She	chr10:121282059-121711911	121659707	rs71482899	0.4	0.280435	0.4	SEC23IP	ENSG00000107651	ITU	0.331683	0.182424	0.336634
She	chr10:121282059-121711911	121659707	rs71482899	0.4	0.280435	0.4	SEC23IP	ENSG00000107651	Kalash	0.391304	0.251995	0.391304
She	chr10:121282059-121711911	121659707	rs71482899	0.4	0.280435	0.4	SEC23IP	ENSG00000107651	PJL	0.310526	0.174079	0.326316
She	chr10:121282059-121711911	121659707	rs71482899	0.4	0.280435	0.4	SEC23IP	ENSG00000107651	Pathan	0.229167	0.153863	0.416667
She	chr10:121282059-121711911	121659707	rs71482899	0.4	0.280435	0.4	SEC23IP	ENSG00000107651	STU	0.289216	0.163714	0.367647
She	chr10:121282059-121711911	121659707	rs71482899	0.4	0.280435	0.4	SEC23IP	ENSG00000107651	Sindhi	0.217391	0.155291	0.391304
She	chr10:121282059-121711911	121660709	rs61870591	0.4	0.280435	0.4	SEC23IP	ENSG00000107651	BEB	0.337209	0.175637	0.360465
She	chr10:121282059-121711911	121660709	rs61870591	0.4	0.280435	0.4	SEC23IP	ENSG00000107651	Burusho	0.25	0.15125	0.291667
She	chr10:121282059-121711911	121660709	rs61870591	0.4	0.280435	0.4	SEC23IP	ENSG00000107651	Kalash	0.391304	0.251995	0.391304
She	chr10:121282059-121711911	121660709	rs61870591	0.4	0.280435	0.4	SEC23IP	ENSG00000107651	Pathan	0.229167	0.153863	0.416667
She	chr10:121282059-121711911	121660709	rs61870591	0.4	0.280435	0.4	SEC23IP	ENSG00000107651	Sindhi	0.217391	0.155291	0.391304
She	chr10:121282059-121711911	121664714	rs35241512	0.4	0.280435	0.4	SEC23IP	ENSG00000107651	Kalash	0.391304	0.251995	0.391304
She	chr10:121282059-121711911	121668501	rs3740569	0.4	0.280435	0.4	SEC23IP	ENSG00000107651	BEB	0.337209	0.175637	0.360465
She	chr10:121282059-121711911	121668501	rs3740569	0.4	0.280435	0.4	SEC23IP	ENSG00000107651	Burusho	0.25	0.15125	0.291667
She	chr10:121282059-121711911	121668501	rs3740569	0.4	0.280435	0.4	SEC23IP	ENSG00000107651	GIH	0.315534	0.165339	0.34466
She	chr10:121282059-121711911	121668501	rs3740569	0.4	0.280435	0.4	SEC23IP	ENSG00000107651	ITU	0.331683	0.182424	0.336634
She	chr10:121282059-121711911	121668501	rs3740569	0.4	0.280435	0.4	SEC23IP	ENSG00000107651	Kalash	0.391304	0.251995	0.391304
She	chr10:121282059-121711911	121668501	rs3740569	0.4	0.280435	0.4	SEC23IP	ENSG00000107651	PJL	0.310526	0.174079	0.326316
She	chr10:121282059-121711911	121668501	rs3740569	0.4	0.280435	0.4	SEC23IP	ENSG00000107651	Pathan	0.229167	0.153863	0.416667
She	chr10:121282059-121711911	121668501	rs3740569	0.4	0.280435	0.4	SEC23IP	ENSG00000107651	STU	0.289216	0.163714	0.367647
She	chr10:121282059-121711911	121668501	rs3740569	0.4	0.280435	0.4	SEC23IP	ENSG00000107651	Sindhi	0.217391	0.155291	0.391304
She	chr10:121282059-121711911	121668656	rs3740570	0.4	0.280435	0.4	SEC23IP	ENSG00000107651	BEB	0.337209	0.175637	0.360465
She	chr10:121282059-121711911	121668656	rs3740570	0.4	0.280435	0.4	SEC23IP	ENSG00000107651	Burusho	0.25	0.15125	0.291667
She	chr10:121282059-121711911	121668656	rs3740570	0.4	0.280435	0.4	SEC23IP	ENSG00000107651	Kalash	0.391304	0.251995	0.391304
She	chr10:121282059-121711911	121668656	rs3740570	0.4	0.280435	0.4	SEC23IP	ENSG00000107651	Pathan	0.229167	0.153863	0.416667
She	chr10:121282059-121711911	121668656	rs3740570	0.4	0.280435	0.4	SEC23IP	ENSG00000107651	Sindhi	0.217391	0.155291	0.391304
She	chr10:121282059-121711911	121669997	rs4388794	0.4	0.280435	0.4	SEC23IP	ENSG00000107651	BEB	0.337209	0.175637	0.360465
She	chr10:121282059-121711911	121669997	rs4388794	0.4	0.280435	0.4	SEC23IP	ENSG00000107651	Burusho	0.25	0.15125	0.291667
She	chr10:121282059-121711911	121669997	rs4388794	0.4	0.280435	0.4	SEC23IP	ENSG00000107651	GIH	0.315534	0.165339	0.34466
She	chr10:121282059-121711911	121669997	rs4388794	0.4	0.280435	0.4	SEC23IP	ENSG00000107651	ITU	0.331683	0.182424	0.336634
She	chr10:121282059-121711911	121669997	rs4388794	0.4	0.280435	0.4	SEC23IP	ENSG00000107651	Kalash	0.391304	0.251995	0.391304
She	chr10:121282059-121711911	121669997	rs4388794	0.4	0.280435	0.4	SEC23IP	ENSG00000107651	PJL	0.310526	0.174079	0.326316
She	chr10:121282059-121711911	121669997	rs4388794	0.4	0.280435	0.4	SEC23IP	ENSG00000107651	Pathan	0.229167	0.153863	0.416667
She	chr10:121282059-121711911	121669997	rs4388794	0.4	0.280435	0.4	SEC23IP	ENSG00000107651	STU	0.289216	0.163714	0.367647
She	chr10:121282059-121711911	121669997	rs4388794	0.4	0.280435	0.4	SEC23IP	ENSG00000107651	Sindhi	0.217391	0.155291	0.391304
She	chr10:121282059-121711911	121671651	rs17099368	0.4	0.280435	0.4	SEC23IP	ENSG00000107651	BEB	0.337209	0.175637	0.360465
She	chr10:121282059-121711911	121671651	rs17099368	0.4	0.280435	0.4	SEC23IP	ENSG00000107651	Burusho	0.25	0.15125	0.291667
She	chr10:121282059-121711911	121671651	rs17099368	0.4	0.280435	0.4	SEC23IP	ENSG00000107651	GIH	0.315534	0.165339	0.34466
She	chr10:121282059-121711911	121671651	rs17099368	0.4	0.280435	0.4	SEC23IP	ENSG00000107651	ITU	0.331683	0.182424	0.336634
She	chr10:121282059-121711911	121671651	rs17099368	0.4	0.280435	0.4	SEC23IP	ENSG00000107651	Kalash	0.391304	0.251995	0.391304
She	chr10:121282059-121711911	121671651	rs17099368	0.4	0.280435	0.4	SEC23IP	ENSG00000107651	PJL	0.310526	0.174079	0.326316
She	chr10:121282059-121711911	121671651	rs17099368	0.4	0.280435	0.4	SEC23IP	ENSG00000107651	Pathan	0.229167	0.153863	0.416667
She	chr10:121282059-121711911	121671651	rs17099368	0.4	0.280435	0.4	SEC23IP	ENSG00000107651	STU	0.289216	0.163714	0.367647
She	chr10:121282059-121711911	121671651	rs17099368	0.4	0.280435	0.4	SEC23IP	ENSG00000107651	Sindhi	0.217391	0.155291	0.391304
She	chr10:121282059-121711911	121672920	rs34572248	0.4	0.280435	0.4	SEC23IP	ENSG00000107651	Burusho	0.25	0.15125	0.291667
She	chr10:121282059-121711911	121672920	rs34572248	0.4	0.280435	0.4	SEC23IP	ENSG00000107651	Kalash	0.391304	0.251995	0.391304
She	chr10:121282059-121711911	121672920	rs34572248	0.4	0.280435	0.4	SEC23IP	ENSG00000107651	Pathan	0.229167	0.153863	0.416667
She	chr10:121282059-121711911	121672920	rs34572248	0.4	0.280435	0.4	SEC23IP	ENSG00000107651	Sindhi	0.217391	0.155291	0.391304
She	chr10:121282059-121711911	121674000	rs34233178	0.4	0.280435	0.4	SEC23IP	ENSG00000107651	BEB	0.337209	0.175637	0.360465
She	chr10:121282059-121711911	121674000	rs34233178	0.4	0.280435	0.4	SEC23IP	ENSG00000107651	Burusho	0.25	0.15125	0.291667
She	chr10:121282059-121711911	121674000	rs34233178	0.4	0.280435	0.4	SEC23IP	ENSG00000107651	GIH	0.315534	0.165339	0.34466
She	chr10:121282059-121711911	121674000	rs34233178	0.4	0.280435	0.4	SEC23IP	ENSG00000107651	ITU	0.331683	0.182424	0.336634
She	chr10:121282059-121711911	121674000	rs34233178	0.4	0.280435	0.4	SEC23IP	ENSG00000107651	Kalash	0.391304	0.251995	0.391304
She	chr10:121282059-121711911	121674000	rs34233178	0.4	0.280435	0.4	SEC23IP	ENSG00000107651	PJL	0.310526	0.174079	0.326316
She	chr10:121282059-121711911	121674000	rs34233178	0.4	0.280435	0.4	SEC23IP	ENSG00000107651	Pathan	0.229167	0.153863	0.416667
She	chr10:121282059-121711911	121674000	rs34233178	0.4	0.280435	0.4	SEC23IP	ENSG00000107651	STU	0.289216	0.163714	0.367647
She	chr10:121282059-121711911	121674000	rs34233178	0.4	0.280435	0.4	SEC23IP	ENSG00000107651	Sindhi	0.217391	0.155291	0.391304
She	chr10:121282059-121711911	121674010	rs35862750	0.4	0.280435	0.4	SEC23IP	ENSG00000107651	Burusho	0.25	0.15125	0.291667
She	chr10:121282059-121711911	121674010	rs35862750	0.4	0.280435	0.4	SEC23IP	ENSG00000107651	GIH	0.315534	0.165339	0.34466
She	chr10:121282059-121711911	121674010	rs35862750	0.4	0.280435	0.4	SEC23IP	ENSG00000107651	ITU	0.331683	0.182424	0.336634
She	chr10:121282059-121711911	121674010	rs35862750	0.4	0.280435	0.4	SEC23IP	ENSG00000107651	Kalash	0.391304	0.251995	0.391304
She	chr10:121282059-121711911	121674010	rs35862750	0.4	0.280435	0.4	SEC23IP	ENSG00000107651	PJL	0.310526	0.174079	0.326316
She	chr10:121282059-121711911	121674010	rs35862750	0.4	0.280435	0.4	SEC23IP	ENSG00000107651	Pathan	0.229167	0.153863	0.416667
She	chr10:121282059-121711911	121674010	rs35862750	0.4	0.280435	0.4	SEC23IP	ENSG00000107651	STU	0.289216	0.163714	0.367647
She	chr10:121282059-121711911	121674010	rs35862750	0.4	0.280435	0.4	SEC23IP	ENSG00000107651	Sindhi	0.217391	0.155291	0.391304
She	chr10:121282059-121711911	121675880	rs34675826	0.4	0.280435	0.4	SEC23IP	ENSG00000107651	BEB	0.337209	0.175637	0.360465
She	chr10:121282059-121711911	121675880	rs34675826	0.4	0.280435	0.4	SEC23IP	ENSG00000107651	Burusho	0.25	0.15125	0.291667
She	chr10:121282059-121711911	121675880	rs34675826	0.4	0.280435	0.4	SEC23IP	ENSG00000107651	GIH	0.315534	0.165339	0.34466
She	chr10:121282059-121711911	121675880	rs34675826	0.4	0.280435	0.4	SEC23IP	ENSG00000107651	ITU	0.331683	0.182424	0.336634
She	chr10:121282059-121711911	121675880	rs34675826	0.4	0.280435	0.4	SEC23IP	ENSG00000107651	Kalash	0.391304	0.251995	0.391304
She	chr10:121282059-121711911	121675880	rs34675826	0.4	0.280435	0.4	SEC23IP	ENSG00000107651	PJL	0.310526	0.174079	0.326316
She	chr10:121282059-121711911	121675880	rs34675826	0.4	0.280435	0.4	SEC23IP	ENSG00000107651	Pathan	0.229167	0.153863	0.416667
She	chr10:121282059-121711911	121675880	rs34675826	0.4	0.280435	0.4	SEC23IP	ENSG00000107651	STU	0.289216	0.163714	0.367647
She	chr10:121282059-121711911	121675880	rs34675826	0.4	0.280435	0.4	SEC23IP	ENSG00000107651	Sindhi	0.217391	0.155291	0.391304
She	chr10:121282059-121711911	121680142	rs2271125	0.4	0.280435	0.4	SEC23IP	ENSG00000107651	BEB	0.337209	0.175637	0.360465
She	chr10:121282059-121711911	121680142	rs2271125	0.4	0.280435	0.4	SEC23IP	ENSG00000107651	Burusho	0.25	0.15125	0.291667
She	chr10:121282059-121711911	121680142	rs2271125	0.4	0.280435	0.4	SEC23IP	ENSG00000107651	GIH	0.315534	0.165339	0.34466
She	chr10:121282059-121711911	121680142	rs2271125	0.4	0.280435	0.4	SEC23IP	ENSG00000107651	ITU	0.331683	0.182424	0.336634
She	chr10:121282059-121711911	121680142	rs2271125	0.4	0.280435	0.4	SEC23IP	ENSG00000107651	Kalash	0.391304	0.251995	0.391304
She	chr10:121282059-121711911	121680142	rs2271125	0.4	0.280435	0.4	SEC23IP	ENSG00000107651	PJL	0.310526	0.174079	0.326316
She	chr10:121282059-121711911	121680142	rs2271125	0.4	0.280435	0.4	SEC23IP	ENSG00000107651	Pathan	0.229167	0.153863	0.416667
She	chr10:121282059-121711911	121680142	rs2271125	0.4	0.280435	0.4	SEC23IP	ENSG00000107651	STU	0.289216	0.163714	0.367647
She	chr10:121282059-121711911	121680142	rs2271125	0.4	0.280435	0.4	SEC23IP	ENSG00000107651	Sindhi	0.217391	0.155291	0.391304
She	chr10:121282059-121711911	121680359	rs2271123	0.4	0.280435	0.4	SEC23IP	ENSG00000107651	BEB	0.337209	0.175637	0.360465
She	chr10:121282059-121711911	121680359	rs2271123	0.4	0.280435	0.4	SEC23IP	ENSG00000107651	Burusho	0.25	0.15125	0.291667
She	chr10:121282059-121711911	121680359	rs2271123	0.4	0.280435	0.4	SEC23IP	ENSG00000107651	GIH	0.315534	0.165339	0.34466
She	chr10:121282059-121711911	121680359	rs2271123	0.4	0.280435	0.4	SEC23IP	ENSG00000107651	ITU	0.331683	0.182424	0.336634
She	chr10:121282059-121711911	121680359	rs2271123	0.4	0.280435	0.4	SEC23IP	ENSG00000107651	Kalash	0.391304	0.251995	0.391304
She	chr10:121282059-121711911	121680359	rs2271123	0.4	0.280435	0.4	SEC23IP	ENSG00000107651	PJL	0.310526	0.174079	0.326316
She	chr10:121282059-121711911	121680359	rs2271123	0.4	0.280435	0.4	SEC23IP	ENSG00000107651	Pathan	0.229167	0.153863	0.416667
She	chr10:121282059-121711911	121680359	rs2271123	0.4	0.280435	0.4	SEC23IP	ENSG00000107651	STU	0.289216	0.163714	0.367647
She	chr10:121282059-121711911	121680359	rs2271123	0.4	0.280435	0.4	SEC23IP	ENSG00000107651	Sindhi	0.217391	0.155291	0.391304
She	chr10:121282059-121711911	121681422	rs59633270	0.4	0.280435	0.4	SEC23IP	ENSG00000107651	BEB	0.337209	0.175637	0.360465
She	chr10:121282059-121711911	121681422	rs59633270	0.4	0.280435	0.4	SEC23IP	ENSG00000107651	Burusho	0.25	0.15125	0.291667
She	chr10:121282059-121711911	121681422	rs59633270	0.4	0.280435	0.4	SEC23IP	ENSG00000107651	GIH	0.315534	0.165339	0.34466
She	chr10:121282059-121711911	121681422	rs59633270	0.4	0.280435	0.4	SEC23IP	ENSG00000107651	ITU	0.331683	0.182424	0.336634
She	chr10:121282059-121711911	121681422	rs59633270	0.4	0.280435	0.4	SEC23IP	ENSG00000107651	Kalash	0.391304	0.251995	0.391304
She	chr10:121282059-121711911	121681422	rs59633270	0.4	0.280435	0.4	SEC23IP	ENSG00000107651	PJL	0.310526	0.174079	0.326316
She	chr10:121282059-121711911	121681422	rs59633270	0.4	0.280435	0.4	SEC23IP	ENSG00000107651	Pathan	0.229167	0.153863	0.416667
She	chr10:121282059-121711911	121681422	rs59633270	0.4	0.280435	0.4	SEC23IP	ENSG00000107651	STU	0.289216	0.163714	0.367647
She	chr10:121282059-121711911	121681422	rs59633270	0.4	0.280435	0.4	SEC23IP	ENSG00000107651	Sindhi	0.217391	0.155291	0.391304
She	chr10:121282059-121711911	121685559	rs12771873	0.4	0.280435	0.4	SEC23IP	ENSG00000107651	BEB	0.337209	0.175637	0.360465
She	chr10:121282059-121711911	121685559	rs12771873	0.4	0.280435	0.4	SEC23IP	ENSG00000107651	Burusho	0.25	0.15125	0.291667
She	chr10:121282059-121711911	121685559	rs12771873	0.4	0.280435	0.4	SEC23IP	ENSG00000107651	GIH	0.315534	0.165339	0.34466
She	chr10:121282059-121711911	121685559	rs12771873	0.4	0.280435	0.4	SEC23IP	ENSG00000107651	ITU	0.331683	0.182424	0.336634
She	chr10:121282059-121711911	121685559	rs12771873	0.4	0.280435	0.4	SEC23IP	ENSG00000107651	Kalash	0.391304	0.251995	0.391304
She	chr10:121282059-121711911	121685559	rs12771873	0.4	0.280435	0.4	SEC23IP	ENSG00000107651	PJL	0.310526	0.174079	0.326316
She	chr10:121282059-121711911	121685559	rs12771873	0.4	0.280435	0.4	SEC23IP	ENSG00000107651	Pathan	0.229167	0.153863	0.416667
She	chr10:121282059-121711911	121685559	rs12771873	0.4	0.280435	0.4	SEC23IP	ENSG00000107651	STU	0.289216	0.163714	0.367647
She	chr10:121282059-121711911	121685559	rs12771873	0.4	0.280435	0.4	SEC23IP	ENSG00000107651	Sindhi	0.217391	0.155291	0.391304
She	chr10:121282059-121711911	121685895	rs35659548	0.4	0.280435	0.4	SEC23IP	ENSG00000107651	Burusho	0.25	0.15125	0.291667
She	chr10:121282059-121711911	121685895	rs35659548	0.4	0.280435	0.4	SEC23IP	ENSG00000107651	GIH	0.315534	0.165339	0.34466
She	chr10:121282059-121711911	121685895	rs35659548	0.4	0.280435	0.4	SEC23IP	ENSG00000107651	ITU	0.331683	0.182424	0.336634
She	chr10:121282059-121711911	121685895	rs35659548	0.4	0.280435	0.4	SEC23IP	ENSG00000107651	Kalash	0.391304	0.251995	0.391304
She	chr10:121282059-121711911	121685895	rs35659548	0.4	0.280435	0.4	SEC23IP	ENSG00000107651	PJL	0.310526	0.174079	0.326316
She	chr10:121282059-121711911	121685895	rs35659548	0.4	0.280435	0.4	SEC23IP	ENSG00000107651	Pathan	0.229167	0.153863	0.416667
She	chr10:121282059-121711911	121685895	rs35659548	0.4	0.280435	0.4	SEC23IP	ENSG00000107651	STU	0.289216	0.163714	0.367647
She	chr10:121282059-121711911	121685895	rs35659548	0.4	0.280435	0.4	SEC23IP	ENSG00000107651	Sindhi	0.217391	0.155291	0.391304
She	chr10:121282059-121711911	121686228	rs34409912	0.4	0.280435	0.4	SEC23IP	ENSG00000107651	BEB	0.337209	0.175637	0.360465
She	chr10:121282059-121711911	121686228	rs34409912	0.4	0.280435	0.4	SEC23IP	ENSG00000107651	Burusho	0.25	0.15125	0.291667
She	chr10:121282059-121711911	121686228	rs34409912	0.4	0.280435	0.4	SEC23IP	ENSG00000107651	GIH	0.315534	0.165339	0.34466
She	chr10:121282059-121711911	121686228	rs34409912	0.4	0.280435	0.4	SEC23IP	ENSG00000107651	ITU	0.331683	0.182424	0.336634
She	chr10:121282059-121711911	121686228	rs34409912	0.4	0.280435	0.4	SEC23IP	ENSG00000107651	Kalash	0.391304	0.251995	0.391304
She	chr10:121282059-121711911	121686228	rs34409912	0.4	0.280435	0.4	SEC23IP	ENSG00000107651	PJL	0.310526	0.174079	0.326316
She	chr10:121282059-121711911	121686228	rs34409912	0.4	0.280435	0.4	SEC23IP	ENSG00000107651	Pathan	0.229167	0.153863	0.416667
She	chr10:121282059-121711911	121686228	rs34409912	0.4	0.280435	0.4	SEC23IP	ENSG00000107651	STU	0.289216	0.163714	0.367647
She	chr10:121282059-121711911	121686228	rs34409912	0.4	0.280435	0.4	SEC23IP	ENSG00000107651	Sindhi	0.217391	0.155291	0.391304
She	chr10:121282059-121711911	121686714	rs17099382	0.4	0.280435	0.4	SEC23IP	ENSG00000107651	BEB	0.337209	0.175637	0.360465
She	chr10:121282059-121711911	121686714	rs17099382	0.4	0.280435	0.4	SEC23IP	ENSG00000107651	Burusho	0.25	0.15125	0.291667
She	chr10:121282059-121711911	121686714	rs17099382	0.4	0.280435	0.4	SEC23IP	ENSG00000107651	GIH	0.315534	0.165339	0.34466
She	chr10:121282059-121711911	121686714	rs17099382	0.4	0.280435	0.4	SEC23IP	ENSG00000107651	ITU	0.331683	0.182424	0.336634
She	chr10:121282059-121711911	121686714	rs17099382	0.4	0.280435	0.4	SEC23IP	ENSG00000107651	Kalash	0.391304	0.251995	0.391304
She	chr10:121282059-121711911	121686714	rs17099382	0.4	0.280435	0.4	SEC23IP	ENSG00000107651	PJL	0.310526	0.174079	0.326316
She	chr10:121282059-121711911	121686714	rs17099382	0.4	0.280435	0.4	SEC23IP	ENSG00000107651	Pathan	0.229167	0.153863	0.416667
She	chr10:121282059-121711911	121686714	rs17099382	0.4	0.280435	0.4	SEC23IP	ENSG00000107651	STU	0.289216	0.163714	0.367647
She	chr10:121282059-121711911	121686714	rs17099382	0.4	0.280435	0.4	SEC23IP	ENSG00000107651	Sindhi	0.217391	0.155291	0.391304
She	chr10:121282059-121711911	121687420	rs12780763	0.4	0.280435	0.4	SEC23IP	ENSG00000107651	BEB	0.337209	0.175637	0.360465
She	chr10:121282059-121711911	121687420	rs12780763	0.4	0.280435	0.4	SEC23IP	ENSG00000107651	Burusho	0.25	0.15125	0.291667
She	chr10:121282059-121711911	121687420	rs12780763	0.4	0.280435	0.4	SEC23IP	ENSG00000107651	GIH	0.315534	0.165339	0.34466
She	chr10:121282059-121711911	121687420	rs12780763	0.4	0.280435	0.4	SEC23IP	ENSG00000107651	ITU	0.331683	0.182424	0.336634
She	chr10:121282059-121711911	121687420	rs12780763	0.4	0.280435	0.4	SEC23IP	ENSG00000107651	Kalash	0.391304	0.251995	0.391304
She	chr10:121282059-121711911	121687420	rs12780763	0.4	0.280435	0.4	SEC23IP	ENSG00000107651	PJL	0.310526	0.174079	0.326316
She	chr10:121282059-121711911	121687420	rs12780763	0.4	0.280435	0.4	SEC23IP	ENSG00000107651	Pathan	0.229167	0.153863	0.416667
She	chr10:121282059-121711911	121687420	rs12780763	0.4	0.280435	0.4	SEC23IP	ENSG00000107651	STU	0.289216	0.163714	0.367647
She	chr10:121282059-121711911	121687420	rs12780763	0.4	0.280435	0.4	SEC23IP	ENSG00000107651	Sindhi	0.217391	0.155291	0.391304
She	chr10:121282059-121711911	121692152	rs2279941	0.4	0.280435	0.4	SEC23IP	ENSG00000107651	BEB	0.337209	0.175637	0.360465
She	chr10:121282059-121711911	121692152	rs2279941	0.4	0.280435	0.4	SEC23IP	ENSG00000107651	Burusho	0.25	0.15125	0.291667
She	chr10:121282059-121711911	121692152	rs2279941	0.4	0.280435	0.4	SEC23IP	ENSG00000107651	GIH	0.315534	0.165339	0.34466
She	chr10:121282059-121711911	121692152	rs2279941	0.4	0.280435	0.4	SEC23IP	ENSG00000107651	ITU	0.331683	0.182424	0.336634
She	chr10:121282059-121711911	121692152	rs2279941	0.4	0.280435	0.4	SEC23IP	ENSG00000107651	Kalash	0.391304	0.251995	0.391304
She	chr10:121282059-121711911	121692152	rs2279941	0.4	0.280435	0.4	SEC23IP	ENSG00000107651	PJL	0.310526	0.174079	0.326316
She	chr10:121282059-121711911	121692152	rs2279941	0.4	0.280435	0.4	SEC23IP	ENSG00000107651	Pathan	0.229167	0.153863	0.416667
She	chr10:121282059-121711911	121692152	rs2279941	0.4	0.280435	0.4	SEC23IP	ENSG00000107651	STU	0.289216	0.163714	0.367647
She	chr10:121282059-121711911	121692152	rs2279941	0.4	0.280435	0.4	SEC23IP	ENSG00000107651	Sindhi	0.217391	0.155291	0.391304
She	chr10:121282059-121711911	121692777	rs2279940	0.4	0.280435	0.4	SEC23IP	ENSG00000107651	Burusho	0.25	0.15125	0.291667
She	chr10:121282059-121711911	121692777	rs2279940	0.4	0.280435	0.4	SEC23IP	ENSG00000107651	ITU	0.331683	0.182424	0.336634
She	chr10:121282059-121711911	121692777	rs2279940	0.4	0.280435	0.4	SEC23IP	ENSG00000107651	Kalash	0.391304	0.251995	0.391304
She	chr10:121282059-121711911	121692777	rs2279940	0.4	0.280435	0.4	SEC23IP	ENSG00000107651	PJL	0.310526	0.174079	0.326316
She	chr10:121282059-121711911	121692777	rs2279940	0.4	0.280435	0.4	SEC23IP	ENSG00000107651	Pathan	0.229167	0.153863	0.416667
[truncated: 13,933 more rows]

## Sheet: Chagyrskaya
Population	Chromosomal Segment	Position	Variant ID	Archaic Allele Frequency	Average Segment Allele Frequency	Maximum Allele Frequency of Segment	snpEff Gene	snpEff Gene ID	Matching Population	Matching Population Archaic Allele Frequency	Matching Population Average Segment Allele Frequency	Matching Population Maximum Allele Frequency of Segment
Karitiana	chr1:165199987-165908152	165528135	rs116996797	0.416667	0.158737	0.416667	LRRC52-AS1	ENSG00000237463	Colombian	0.214286	0.222286	0.5
Karitiana	chr1:165199987-165908152	165528135	rs116996797	0.416667	0.158737	0.416667	LRRC52-AS1	ENSG00000237463	Maya	0.214286	0.215617	0.333333
Karitiana	chr1:165199987-165908152	165528135	rs116996797	0.416667	0.158737	0.416667	LRRC52-AS1	ENSG00000237463	PEL	0.294118	0.191816	0.3
Karitiana	chr1:165199987-165908152	165528135	rs116996797	0.416667	0.158737	0.416667	LRRC52-AS1	ENSG00000237463	Pima	0.428571	0.262723	0.535714
Karitiana	chr1:165199987-165908152	165528135	rs116996797	0.416667	0.158737	0.416667	LRRC52-AS1	ENSG00000237463	Surui	0.5	0.5	0.5
Karitiana	chr1:165199987-165908152	165532295	rs77083172	0.416667	0.158737	0.416667	LRRC52-AS1	ENSG00000237463	Colombian	0.214286	0.222286	0.5
Karitiana	chr1:165199987-165908152	165532295	rs77083172	0.416667	0.158737	0.416667	LRRC52-AS1	ENSG00000237463	Maya	0.214286	0.215617	0.333333
Karitiana	chr1:165199987-165908152	165532295	rs77083172	0.416667	0.158737	0.416667	LRRC52-AS1	ENSG00000237463	PEL	0.294118	0.191816	0.3
Karitiana	chr1:165199987-165908152	165532295	rs77083172	0.416667	0.158737	0.416667	LRRC52-AS1	ENSG00000237463	Pima	0.428571	0.262723	0.535714
Karitiana	chr1:165199987-165908152	165532295	rs77083172	0.416667	0.158737	0.416667	LRRC52-AS1	ENSG00000237463	Surui	0.5	0.5	0.5
Surui	chr1:165471471-165806290	165528135	rs116996797	0.5	0.5	0.5	LRRC52-AS1	ENSG00000237463	Colombian	0.214286	0.222286	0.5
Surui	chr1:165471471-165806290	165528135	rs116996797	0.5	0.5	0.5	LRRC52-AS1	ENSG00000237463	Karitiana	0.416667	0.158737	0.416667
Surui	chr1:165471471-165806290	165528135	rs116996797	0.5	0.5	0.5	LRRC52-AS1	ENSG00000237463	Maya	0.214286	0.215617	0.333333
Surui	chr1:165471471-165806290	165528135	rs116996797	0.5	0.5	0.5	LRRC52-AS1	ENSG00000237463	PEL	0.294118	0.191816	0.3
Surui	chr1:165471471-165806290	165528135	rs116996797	0.5	0.5	0.5	LRRC52-AS1	ENSG00000237463	Pima	0.428571	0.262723	0.535714
Surui	chr1:165471471-165806290	165532295	rs77083172	0.5	0.5	0.5	LRRC52-AS1	ENSG00000237463	Colombian	0.214286	0.222286	0.5
Surui	chr1:165471471-165806290	165532295	rs77083172	0.5	0.5	0.5	LRRC52-AS1	ENSG00000237463	Karitiana	0.416667	0.158737	0.416667
Surui	chr1:165471471-165806290	165532295	rs77083172	0.5	0.5	0.5	LRRC52-AS1	ENSG00000237463	Maya	0.214286	0.215617	0.333333
Surui	chr1:165471471-165806290	165532295	rs77083172	0.5	0.5	0.5	LRRC52-AS1	ENSG00000237463	PEL	0.294118	0.191816	0.3
Surui	chr1:165471471-165806290	165532295	rs77083172	0.5	0.5	0.5	LRRC52-AS1	ENSG00000237463	Pima	0.428571	0.262723	0.535714
Miao	chr1:212649295-212759493	212738835	rs3806460	0.4	0.407627	0.45	ENSG00000288007	ENSG00000288007	CHB	0.427184	0.111005	0.446602
Miao	chr1:212649295-212759493	212738835	rs3806460	0.4	0.407627	0.45	ENSG00000288007	ENSG00000288007	CHS	0.404762	0.36853	0.428571
Miao	chr1:212649295-212759493	212738835	rs3806460	0.4	0.407627	0.45	ENSG00000288007	ENSG00000288007	Cambodian	0.3	0.276562	0.35
Miao	chr1:212649295-212759493	212738835	rs3806460	0.4	0.407627	0.45	ENSG00000288007	ENSG00000288007	Colombian	0.5	0.526157	0.642857
Miao	chr1:212649295-212759493	212738835	rs3806460	0.4	0.407627	0.45	ENSG00000288007	ENSG00000288007	Dai	0.277778	0.186806	0.277778
Miao	chr1:212649295-212759493	212738835	rs3806460	0.4	0.407627	0.45	ENSG00000288007	ENSG00000288007	Daur	0.444444	0.317938	0.444444
Miao	chr1:212649295-212759493	212738835	rs3806460	0.4	0.407627	0.45	ENSG00000288007	ENSG00000288007	Hezhen	0.388889	0.258454	0.388889
Miao	chr1:212649295-212759493	212738835	rs3806460	0.4	0.407627	0.45	ENSG00000288007	ENSG00000288007	JPT	0.27451	0.225703	0.284314
Miao	chr1:212649295-212759493	212738835	rs3806460	0.4	0.407627	0.45	ENSG00000288007	ENSG00000288007	Japanese	0.339286	0.233705	0.357143
Miao	chr1:212649295-212759493	212738835	rs3806460	0.4	0.407627	0.45	ENSG00000288007	ENSG00000288007	KHV	0.30303	0.284731	0.328283
Miao	chr1:212649295-212759493	212738835	rs3806460	0.4	0.407627	0.45	ENSG00000288007	ENSG00000288007	Karitiana	0.416667	0.328767	0.541667
Miao	chr1:212649295-212759493	212738835	rs3806460	0.4	0.407627	0.45	ENSG00000288007	ENSG00000288007	MXL	0.28125	0.245811	0.28125
Miao	chr1:212649295-212759493	212738835	rs3806460	0.4	0.407627	0.45	ENSG00000288007	ENSG00000288007	Maya	0.547619	0.540241	0.666667
Miao	chr1:212649295-212759493	212738835	rs3806460	0.4	0.407627	0.45	ENSG00000288007	ENSG00000288007	Mongola	0.4	0.305556	0.4
Miao	chr1:212649295-212759493	212738835	rs3806460	0.4	0.407627	0.45	ENSG00000288007	ENSG00000288007	Naxi	0.5	0.45873	0.5
Miao	chr1:212649295-212759493	212738835	rs3806460	0.4	0.407627	0.45	ENSG00000288007	ENSG00000288007	PEL	0.417647	0.421541	0.511765
Miao	chr1:212649295-212759493	212738835	rs3806460	0.4	0.407627	0.45	ENSG00000288007	ENSG00000288007	Pima	0.464286	0.349207	0.571429
Miao	chr1:212649295-212759493	212738835	rs3806460	0.4	0.407627	0.45	ENSG00000288007	ENSG00000288007	Surui	0.75	0.75	0.75
Miao	chr1:212649295-212759493	212738835	rs3806460	0.4	0.407627	0.45	ENSG00000288007	ENSG00000288007	Tu	0.3125	0.200868	0.375
Miao	chr1:212649295-212759493	212738835	rs3806460	0.4	0.407627	0.45	ENSG00000288007	ENSG00000288007	Uygur	0.25	0.239943	0.25
Miao	chr1:212649295-212759493	212738835	rs3806460	0.4	0.407627	0.45	ENSG00000288007	ENSG00000288007	Xibo	0.277778	0.0918274	0.333333
Miao	chr1:212649295-212759493	212738835	rs3806460	0.4	0.407627	0.45	ENSG00000288007	ENSG00000288007	Yakut	0.26	0.272857	0.3
Miao	chr1:212649295-212759493	212741763	rs11119974	0.4	0.407627	0.45	ATF3	ENSG00000162772	CHB	0.427184	0.111005	0.446602
Miao	chr1:212649295-212759493	212741763	rs11119974	0.4	0.407627	0.45	ATF3	ENSG00000162772	CHS	0.404762	0.36853	0.428571
Miao	chr1:212649295-212759493	212741763	rs11119974	0.4	0.407627	0.45	ATF3	ENSG00000162772	Cambodian	0.3	0.276562	0.35
Miao	chr1:212649295-212759493	212741763	rs11119974	0.4	0.407627	0.45	ATF3	ENSG00000162772	Colombian	0.5	0.526157	0.642857
Miao	chr1:212649295-212759493	212741763	rs11119974	0.4	0.407627	0.45	ATF3	ENSG00000162772	Dai	0.277778	0.186806	0.277778
Miao	chr1:212649295-212759493	212741763	rs11119974	0.4	0.407627	0.45	ATF3	ENSG00000162772	Daur	0.444444	0.317938	0.444444
Miao	chr1:212649295-212759493	212741763	rs11119974	0.4	0.407627	0.45	ATF3	ENSG00000162772	Hezhen	0.388889	0.258454	0.388889
Miao	chr1:212649295-212759493	212741763	rs11119974	0.4	0.407627	0.45	ATF3	ENSG00000162772	JPT	0.27451	0.225703	0.284314
Miao	chr1:212649295-212759493	212741763	rs11119974	0.4	0.407627	0.45	ATF3	ENSG00000162772	Japanese	0.339286	0.233705	0.357143
Miao	chr1:212649295-212759493	212741763	rs11119974	0.4	0.407627	0.45	ATF3	ENSG00000162772	KHV	0.30303	0.284731	0.328283
Miao	chr1:212649295-212759493	212741763	rs11119974	0.4	0.407627	0.45	ATF3	ENSG00000162772	Karitiana	0.416667	0.328767	0.541667
Miao	chr1:212649295-212759493	212741763	rs11119974	0.4	0.407627	0.45	ATF3	ENSG00000162772	MXL	0.28125	0.245811	0.28125
Miao	chr1:212649295-212759493	212741763	rs11119974	0.4	0.407627	0.45	ATF3	ENSG00000162772	Maya	0.547619	0.540241	0.666667
Miao	chr1:212649295-212759493	212741763	rs11119974	0.4	0.407627	0.45	ATF3	ENSG00000162772	Mongola	0.4	0.305556	0.4
Miao	chr1:212649295-212759493	212741763	rs11119974	0.4	0.407627	0.45	ATF3	ENSG00000162772	Naxi	0.5	0.45873	0.5
Miao	chr1:212649295-212759493	212741763	rs11119974	0.4	0.407627	0.45	ATF3	ENSG00000162772	PEL	0.417647	0.421541	0.511765
Miao	chr1:212649295-212759493	212741763	rs11119974	0.4	0.407627	0.45	ATF3	ENSG00000162772	Pima	0.464286	0.349207	0.571429
Miao	chr1:212649295-212759493	212741763	rs11119974	0.4	0.407627	0.45	ATF3	ENSG00000162772	Surui	0.75	0.75	0.75
Miao	chr1:212649295-212759493	212741763	rs11119974	0.4	0.407627	0.45	ATF3	ENSG00000162772	Tu	0.3125	0.200868	0.375
Miao	chr1:212649295-212759493	212741763	rs11119974	0.4	0.407627	0.45	ATF3	ENSG00000162772	Uygur	0.25	0.239943	0.25
Miao	chr1:212649295-212759493	212741763	rs11119974	0.4	0.407627	0.45	ATF3	ENSG00000162772	Xibo	0.277778	0.0918274	0.333333
Miao	chr1:212649295-212759493	212741763	rs11119974	0.4	0.407627	0.45	ATF3	ENSG00000162772	Yakut	0.26	0.272857	0.3
Miao	chr1:212649295-212759493	212742400	rs10863980	0.4	0.407627	0.45	ATF3	ENSG00000162772	CHB	0.427184	0.111005	0.446602
Miao	chr1:212649295-212759493	212742400	rs10863980	0.4	0.407627	0.45	ATF3	ENSG00000162772	CHS	0.404762	0.36853	0.428571
Miao	chr1:212649295-212759493	212742400	rs10863980	0.4	0.407627	0.45	ATF3	ENSG00000162772	Cambodian	0.3	0.276562	0.35
Miao	chr1:212649295-212759493	212742400	rs10863980	0.4	0.407627	0.45	ATF3	ENSG00000162772	Colombian	0.5	0.526157	0.642857
Miao	chr1:212649295-212759493	212742400	rs10863980	0.4	0.407627	0.45	ATF3	ENSG00000162772	Dai	0.277778	0.186806	0.277778
Miao	chr1:212649295-212759493	212742400	rs10863980	0.4	0.407627	0.45	ATF3	ENSG00000162772	Daur	0.444444	0.317938	0.444444
Miao	chr1:212649295-212759493	212742400	rs10863980	0.4	0.407627	0.45	ATF3	ENSG00000162772	Hezhen	0.388889	0.258454	0.388889
Miao	chr1:212649295-212759493	212742400	rs10863980	0.4	0.407627	0.45	ATF3	ENSG00000162772	JPT	0.27451	0.225703	0.284314
Miao	chr1:212649295-212759493	212742400	rs10863980	0.4	0.407627	0.45	ATF3	ENSG00000162772	Japanese	0.339286	0.233705	0.357143
Miao	chr1:212649295-212759493	212742400	rs10863980	0.4	0.407627	0.45	ATF3	ENSG00000162772	KHV	0.30303	0.284731	0.328283
Miao	chr1:212649295-212759493	212742400	rs10863980	0.4	0.407627	0.45	ATF3	ENSG00000162772	Karitiana	0.416667	0.328767	0.541667
Miao	chr1:212649295-212759493	212742400	rs10863980	0.4	0.407627	0.45	ATF3	ENSG00000162772	MXL	0.28125	0.245811	0.28125
Miao	chr1:212649295-212759493	212742400	rs10863980	0.4	0.407627	0.45	ATF3	ENSG00000162772	Maya	0.547619	0.540241	0.666667
Miao	chr1:212649295-212759493	212742400	rs10863980	0.4	0.407627	0.45	ATF3	ENSG00000162772	Mongola	0.4	0.305556	0.4
Miao	chr1:212649295-212759493	212742400	rs10863980	0.4	0.407627	0.45	ATF3	ENSG00000162772	Naxi	0.5	0.45873	0.5
Miao	chr1:212649295-212759493	212742400	rs10863980	0.4	0.407627	0.45	ATF3	ENSG00000162772	PEL	0.417647	0.421541	0.511765
Miao	chr1:212649295-212759493	212742400	rs10863980	0.4	0.407627	0.45	ATF3	ENSG00000162772	Pima	0.464286	0.349207	0.571429
Miao	chr1:212649295-212759493	212742400	rs10863980	0.4	0.407627	0.45	ATF3	ENSG00000162772	Surui	0.75	0.75	0.75
Miao	chr1:212649295-212759493	212742400	rs10863980	0.4	0.407627	0.45	ATF3	ENSG00000162772	Tu	0.3125	0.200868	0.375
Miao	chr1:212649295-212759493	212742400	rs10863980	0.4	0.407627	0.45	ATF3	ENSG00000162772	Uygur	0.25	0.239943	0.25
Miao	chr1:212649295-212759493	212742400	rs10863980	0.4	0.407627	0.45	ATF3	ENSG00000162772	Xibo	0.277778	0.0918274	0.333333
Miao	chr1:212649295-212759493	212742400	rs10863980	0.4	0.407627	0.45	ATF3	ENSG00000162772	Yakut	0.26	0.272857	0.3
Miao	chr1:212649295-212759493	212742675	rs4951613	0.4	0.407627	0.45	ATF3	ENSG00000162772	CHB	0.427184	0.111005	0.446602
Miao	chr1:212649295-212759493	212742675	rs4951613	0.4	0.407627	0.45	ATF3	ENSG00000162772	CHS	0.404762	0.36853	0.428571
Miao	chr1:212649295-212759493	212742675	rs4951613	0.4	0.407627	0.45	ATF3	ENSG00000162772	Cambodian	0.3	0.276562	0.35
Miao	chr1:212649295-212759493	212742675	rs4951613	0.4	0.407627	0.45	ATF3	ENSG00000162772	Colombian	0.5	0.526157	0.642857
Miao	chr1:212649295-212759493	212742675	rs4951613	0.4	0.407627	0.45	ATF3	ENSG00000162772	Dai	0.277778	0.186806	0.277778
Miao	chr1:212649295-212759493	212742675	rs4951613	0.4	0.407627	0.45	ATF3	ENSG00000162772	Daur	0.444444	0.317938	0.444444
Miao	chr1:212649295-212759493	212742675	rs4951613	0.4	0.407627	0.45	ATF3	ENSG00000162772	Hezhen	0.388889	0.258454	0.388889
Miao	chr1:212649295-212759493	212742675	rs4951613	0.4	0.407627	0.45	ATF3	ENSG00000162772	JPT	0.27451	0.225703	0.284314
Miao	chr1:212649295-212759493	212742675	rs4951613	0.4	0.407627	0.45	ATF3	ENSG00000162772	Japanese	0.339286	0.233705	0.357143
Miao	chr1:212649295-212759493	212742675	rs4951613	0.4	0.407627	0.45	ATF3	ENSG00000162772	KHV	0.30303	0.284731	0.328283
Miao	chr1:212649295-212759493	212742675	rs4951613	0.4	0.407627	0.45	ATF3	ENSG00000162772	Karitiana	0.416667	0.328767	0.541667
Miao	chr1:212649295-212759493	212742675	rs4951613	0.4	0.407627	0.45	ATF3	ENSG00000162772	MXL	0.28125	0.245811	0.28125
Miao	chr1:212649295-212759493	212742675	rs4951613	0.4	0.407627	0.45	ATF3	ENSG00000162772	Maya	0.547619	0.540241	0.666667
Miao	chr1:212649295-212759493	212742675	rs4951613	0.4	0.407627	0.45	ATF3	ENSG00000162772	Mongola	0.4	0.305556	0.4
Miao	chr1:212649295-212759493	212742675	rs4951613	0.4	0.407627	0.45	ATF3	ENSG00000162772	Naxi	0.5	0.45873	0.5
Miao	chr1:212649295-212759493	212742675	rs4951613	0.4	0.407627	0.45	ATF3	ENSG00000162772	PEL	0.417647	0.421541	0.511765
Miao	chr1:212649295-212759493	212742675	rs4951613	0.4	0.407627	0.45	ATF3	ENSG00000162772	Pima	0.464286	0.349207	0.571429
Miao	chr1:212649295-212759493	212742675	rs4951613	0.4	0.407627	0.45	ATF3	ENSG00000162772	Surui	0.75	0.75	0.75
Miao	chr1:212649295-212759493	212742675	rs4951613	0.4	0.407627	0.45	ATF3	ENSG00000162772	Tu	0.3125	0.200868	0.375
Miao	chr1:212649295-212759493	212742675	rs4951613	0.4	0.407627	0.45	ATF3	ENSG00000162772	Uygur	0.25	0.239943	0.25
Miao	chr1:212649295-212759493	212742675	rs4951613	0.4	0.407627	0.45	ATF3	ENSG00000162772	Xibo	0.277778	0.0918274	0.333333
Miao	chr1:212649295-212759493	212742675	rs4951613	0.4	0.407627	0.45	ATF3	ENSG00000162772	Yakut	0.26	0.272857	0.3
Miao	chr1:212649295-212759493	212744370	rs12038766	0.4	0.407627	0.45	ATF3	ENSG00000162772	CHB	0.427184	0.111005	0.446602
Miao	chr1:212649295-212759493	212744370	rs12038766	0.4	0.407627	0.45	ATF3	ENSG00000162772	CHS	0.404762	0.36853	0.428571
Miao	chr1:212649295-212759493	212744370	rs12038766	0.4	0.407627	0.45	ATF3	ENSG00000162772	Colombian	0.5	0.526157	0.642857
Miao	chr1:212649295-212759493	212744370	rs12038766	0.4	0.407627	0.45	ATF3	ENSG00000162772	Dai	0.277778	0.186806	0.277778
Miao	chr1:212649295-212759493	212744370	rs12038766	0.4	0.407627	0.45	ATF3	ENSG00000162772	Daur	0.444444	0.317938	0.444444
Miao	chr1:212649295-212759493	212744370	rs12038766	0.4	0.407627	0.45	ATF3	ENSG00000162772	Hezhen	0.388889	0.258454	0.388889
Miao	chr1:212649295-212759493	212744370	rs12038766	0.4	0.407627	0.45	ATF3	ENSG00000162772	JPT	0.27451	0.225703	0.284314
Miao	chr1:212649295-212759493	212744370	rs12038766	0.4	0.407627	0.45	ATF3	ENSG00000162772	Japanese	0.339286	0.233705	0.357143
Miao	chr1:212649295-212759493	212744370	rs12038766	0.4	0.407627	0.45	ATF3	ENSG00000162772	KHV	0.30303	0.284731	0.328283
Miao	chr1:212649295-212759493	212744370	rs12038766	0.4	0.407627	0.45	ATF3	ENSG00000162772	Karitiana	0.416667	0.328767	0.541667
Miao	chr1:212649295-212759493	212744370	rs12038766	0.4	0.407627	0.45	ATF3	ENSG00000162772	MXL	0.28125	0.245811	0.28125
Miao	chr1:212649295-212759493	212744370	rs12038766	0.4	0.407627	0.45	ATF3	ENSG00000162772	Mongola	0.4	0.305556	0.4
Miao	chr1:212649295-212759493	212744370	rs12038766	0.4	0.407627	0.45	ATF3	ENSG00000162772	Naxi	0.5	0.45873	0.5
Miao	chr1:212649295-212759493	212744370	rs12038766	0.4	0.407627	0.45	ATF3	ENSG00000162772	PEL	0.417647	0.421541	0.511765
Miao	chr1:212649295-212759493	212744370	rs12038766	0.4	0.407627	0.45	ATF3	ENSG00000162772	Pima	0.464286	0.349207	0.571429
Miao	chr1:212649295-212759493	212744370	rs12038766	0.4	0.407627	0.45	ATF3	ENSG00000162772	Surui	0.75	0.75	0.75
Miao	chr1:212649295-212759493	212744370	rs12038766	0.4	0.407627	0.45	ATF3	ENSG00000162772	Tu	0.3125	0.200868	0.375
Miao	chr1:212649295-212759493	212744370	rs12038766	0.4	0.407627	0.45	ATF3	ENSG00000162772	Uygur	0.25	0.239943	0.25
Miao	chr1:212649295-212759493	212744370	rs12038766	0.4	0.407627	0.45	ATF3	ENSG00000162772	Xibo	0.277778	0.0918274	0.333333
Miao	chr1:212649295-212759493	212744370	rs12038766	0.4	0.407627	0.45	ATF3	ENSG00000162772	Yakut	0.26	0.272857	0.3
Miao	chr1:212649295-212759493	212747722	rs11119975	0.4	0.407627	0.45	ATF3	ENSG00000162772	CHB	0.427184	0.111005	0.446602
Miao	chr1:212649295-212759493	212747722	rs11119975	0.4	0.407627	0.45	ATF3	ENSG00000162772	CHS	0.404762	0.36853	0.428571
Miao	chr1:212649295-212759493	212747722	rs11119975	0.4	0.407627	0.45	ATF3	ENSG00000162772	Colombian	0.5	0.526157	0.642857
Miao	chr1:212649295-212759493	212747722	rs11119975	0.4	0.407627	0.45	ATF3	ENSG00000162772	Dai	0.277778	0.186806	0.277778
Miao	chr1:212649295-212759493	212747722	rs11119975	0.4	0.407627	0.45	ATF3	ENSG00000162772	Daur	0.444444	0.317938	0.444444
Miao	chr1:212649295-212759493	212747722	rs11119975	0.4	0.407627	0.45	ATF3	ENSG00000162772	Hezhen	0.388889	0.258454	0.388889
Miao	chr1:212649295-212759493	212747722	rs11119975	0.4	0.407627	0.45	ATF3	ENSG00000162772	JPT	0.27451	0.225703	0.284314
Miao	chr1:212649295-212759493	212747722	rs11119975	0.4	0.407627	0.45	ATF3	ENSG00000162772	Japanese	0.321429	0.233705	0.357143
Miao	chr1:212649295-212759493	212747722	rs11119975	0.4	0.407627	0.45	ATF3	ENSG00000162772	KHV	0.30303	0.284731	0.328283
Miao	chr1:212649295-212759493	212747722	rs11119975	0.4	0.407627	0.45	ATF3	ENSG00000162772	Karitiana	0.416667	0.328767	0.541667
Miao	chr1:212649295-212759493	212747722	rs11119975	0.4	0.407627	0.45	ATF3	ENSG00000162772	MXL	0.273438	0.245811	0.28125
Miao	chr1:212649295-212759493	212747722	rs11119975	0.4	0.407627	0.45	ATF3	ENSG00000162772	Maya	0.547619	0.540241	0.666667
Miao	chr1:212649295-212759493	212747722	rs11119975	0.4	0.407627	0.45	ATF3	ENSG00000162772	Mongola	0.4	0.305556	0.4
Miao	chr1:212649295-212759493	212747722	rs11119975	0.4	0.407627	0.45	ATF3	ENSG00000162772	Naxi	0.5	0.45873	0.5
Miao	chr1:212649295-212759493	212747722	rs11119975	0.4	0.407627	0.45	ATF3	ENSG00000162772	PEL	0.411765	0.421541	0.511765
Miao	chr1:212649295-212759493	212747722	rs11119975	0.4	0.407627	0.45	ATF3	ENSG00000162772	Pima	0.464286	0.349207	0.571429
Miao	chr1:212649295-212759493	212747722	rs11119975	0.4	0.407627	0.45	ATF3	ENSG00000162772	Surui	0.75	0.75	0.75
Miao	chr1:212649295-212759493	212747722	rs11119975	0.4	0.407627	0.45	ATF3	ENSG00000162772	Tu	0.3125	0.200868	0.375
Miao	chr1:212649295-212759493	212747722	rs11119975	0.4	0.407627	0.45	ATF3	ENSG00000162772	Xibo	0.277778	0.0918274	0.333333
Miao	chr1:212649295-212759493	212747722	rs11119975	0.4	0.407627	0.45	ATF3	ENSG00000162772	Yakut	0.26	0.272857	0.3
CHS	chr1:212649295-212798601	212738835	rs3806460	0.404762	0.36853	0.428571	ENSG00000288007	ENSG00000288007	CHB	0.427184	0.111005	0.446602
CHS	chr1:212649295-212798601	212738835	rs3806460	0.404762	0.36853	0.428571	ENSG00000288007	ENSG00000288007	Cambodian	0.3	0.276562	0.35
CHS	chr1:212649295-212798601	212738835	rs3806460	0.404762	0.36853	0.428571	ENSG00000288007	ENSG00000288007	Colombian	0.5	0.526157	0.642857
CHS	chr1:212649295-212798601	212738835	rs3806460	0.404762	0.36853	0.428571	ENSG00000288007	ENSG00000288007	Dai	0.277778	0.186806	0.277778
CHS	chr1:212649295-212798601	212738835	rs3806460	0.404762	0.36853	0.428571	ENSG00000288007	ENSG00000288007	Daur	0.444444	0.317938	0.444444
CHS	chr1:212649295-212798601	212738835	rs3806460	0.404762	0.36853	0.428571	ENSG00000288007	ENSG00000288007	Hezhen	0.388889	0.258454	0.388889
CHS	chr1:212649295-212798601	212738835	rs3806460	0.404762	0.36853	0.428571	ENSG00000288007	ENSG00000288007	JPT	0.27451	0.225703	0.284314
CHS	chr1:212649295-212798601	212738835	rs3806460	0.404762	0.36853	0.428571	ENSG00000288007	ENSG00000288007	Japanese	0.339286	0.233705	0.357143
CHS	chr1:212649295-212798601	212738835	rs3806460	0.404762	0.36853	0.428571	ENSG00000288007	ENSG00000288007	KHV	0.30303	0.284731	0.328283
CHS	chr1:212649295-212798601	212738835	rs3806460	0.404762	0.36853	0.428571	ENSG00000288007	ENSG00000288007	Karitiana	0.416667	0.328767	0.541667
CHS	chr1:212649295-212798601	212738835	rs3806460	0.404762	0.36853	0.428571	ENSG00000288007	ENSG00000288007	MXL	0.28125	0.245811	0.28125
CHS	chr1:212649295-212798601	212738835	rs3806460	0.404762	0.36853	0.428571	ENSG00000288007	ENSG00000288007	Maya	0.547619	0.540241	0.666667
CHS	chr1:212649295-212798601	212738835	rs3806460	0.404762	0.36853	0.428571	ENSG00000288007	ENSG00000288007	Miao	0.4	0.407627	0.45
CHS	chr1:212649295-212798601	212738835	rs3806460	0.404762	0.36853	0.428571	ENSG00000288007	ENSG00000288007	Mongola	0.4	0.305556	0.4
CHS	chr1:212649295-212798601	212738835	rs3806460	0.404762	0.36853	0.428571	ENSG00000288007	ENSG00000288007	Naxi	0.5	0.45873	0.5
CHS	chr1:212649295-212798601	212738835	rs3806460	0.404762	0.36853	0.428571	ENSG00000288007	ENSG00000288007	PEL	0.417647	0.421541	0.511765
CHS	chr1:212649295-212798601	212738835	rs3806460	0.404762	0.36853	0.428571	ENSG00000288007	ENSG00000288007	Pima	0.464286	0.349207	0.571429
CHS	chr1:212649295-212798601	212738835	rs3806460	0.404762	0.36853	0.428571	ENSG00000288007	ENSG00000288007	Surui	0.75	0.75	0.75
CHS	chr1:212649295-212798601	212738835	rs3806460	0.404762	0.36853	0.428571	ENSG00000288007	ENSG00000288007	Tu	0.3125	0.200868	0.375
CHS	chr1:212649295-212798601	212738835	rs3806460	0.404762	0.36853	0.428571	ENSG00000288007	ENSG00000288007	Uygur	0.25	0.239943	0.25
CHS	chr1:212649295-212798601	212738835	rs3806460	0.404762	0.36853	0.428571	ENSG00000288007	ENSG00000288007	Xibo	0.277778	0.0918274	0.333333
CHS	chr1:212649295-212798601	212738835	rs3806460	0.404762	0.36853	0.428571	ENSG00000288007	ENSG00000288007	Yakut	0.26	0.272857	0.3
CHS	chr1:212649295-212798601	212741763	rs11119974	0.404762	0.36853	0.428571	ATF3	ENSG00000162772	CHB	0.427184	0.111005	0.446602
CHS	chr1:212649295-212798601	212741763	rs11119974	0.404762	0.36853	0.428571	ATF3	ENSG00000162772	Cambodian	0.3	0.276562	0.35
CHS	chr1:212649295-212798601	212741763	rs11119974	0.404762	0.36853	0.428571	ATF3	ENSG00000162772	Colombian	0.5	0.526157	0.642857
CHS	chr1:212649295-212798601	212741763	rs11119974	0.404762	0.36853	0.428571	ATF3	ENSG00000162772	Dai	0.277778	0.186806	0.277778
CHS	chr1:212649295-212798601	212741763	rs11119974	0.404762	0.36853	0.428571	ATF3	ENSG00000162772	Daur	0.444444	0.317938	0.444444
CHS	chr1:212649295-212798601	212741763	rs11119974	0.404762	0.36853	0.428571	ATF3	ENSG00000162772	Hezhen	0.388889	0.258454	0.388889
CHS	chr1:212649295-212798601	212741763	rs11119974	0.404762	0.36853	0.428571	ATF3	ENSG00000162772	JPT	0.27451	0.225703	0.284314
CHS	chr1:212649295-212798601	212741763	rs11119974	0.404762	0.36853	0.428571	ATF3	ENSG00000162772	Japanese	0.339286	0.233705	0.357143
CHS	chr1:212649295-212798601	212741763	rs11119974	0.404762	0.36853	0.428571	ATF3	ENSG00000162772	KHV	0.30303	0.284731	0.328283
CHS	chr1:212649295-212798601	212741763	rs11119974	0.404762	0.36853	0.428571	ATF3	ENSG00000162772	Karitiana	0.416667	0.328767	0.541667
CHS	chr1:212649295-212798601	212741763	rs11119974	0.404762	0.36853	0.428571	ATF3	ENSG00000162772	MXL	0.28125	0.245811	0.28125
CHS	chr1:212649295-212798601	212741763	rs11119974	0.404762	0.36853	0.428571	ATF3	ENSG00000162772	Maya	0.547619	0.540241	0.666667
CHS	chr1:212649295-212798601	212741763	rs11119974	0.404762	0.36853	0.428571	ATF3	ENSG00000162772	Miao	0.4	0.407627	0.45
CHS	chr1:212649295-212798601	212741763	rs11119974	0.404762	0.36853	0.428571	ATF3	ENSG00000162772	Mongola	0.4	0.305556	0.4
CHS	chr1:212649295-212798601	212741763	rs11119974	0.404762	0.36853	0.428571	ATF3	ENSG00000162772	Naxi	0.5	0.45873	0.5
CHS	chr1:212649295-212798601	212741763	rs11119974	0.404762	0.36853	0.428571	ATF3	ENSG00000162772	PEL	0.417647	0.421541	0.511765
CHS	chr1:212649295-212798601	212741763	rs11119974	0.404762	0.36853	0.428571	ATF3	ENSG00000162772	Pima	0.464286	0.349207	0.571429
CHS	chr1:212649295-212798601	212741763	rs11119974	0.404762	0.36853	0.428571	ATF3	ENSG00000162772	Surui	0.75	0.75	0.75
CHS	chr1:212649295-212798601	212741763	rs11119974	0.404762	0.36853	0.428571	ATF3	ENSG00000162772	Tu	0.3125	0.200868	0.375
CHS	chr1:212649295-212798601	212741763	rs11119974	0.404762	0.36853	0.428571	ATF3	ENSG00000162772	Uygur	0.25	0.239943	0.25
CHS	chr1:212649295-212798601	212741763	rs11119974	0.404762	0.36853	0.428571	ATF3	ENSG00000162772	Xibo	0.277778	0.0918274	0.333333
CHS	chr1:212649295-212798601	212741763	rs11119974	0.404762	0.36853	0.428571	ATF3	ENSG00000162772	Yakut	0.26	0.272857	0.3
CHS	chr1:212649295-212798601	212742400	rs10863980	0.404762	0.36853	0.428571	ATF3	ENSG00000162772	CHB	0.427184	0.111005	0.446602
CHS	chr1:212649295-212798601	212742400	rs10863980	0.404762	0.36853	0.428571	ATF3	ENSG00000162772	Cambodian	0.3	0.276562	0.35
CHS	chr1:212649295-212798601	212742400	rs10863980	0.404762	0.36853	0.428571	ATF3	ENSG00000162772	Colombian	0.5	0.526157	0.642857
CHS	chr1:212649295-212798601	212742400	rs10863980	0.404762	0.36853	0.428571	ATF3	ENSG00000162772	Dai	0.277778	0.186806	0.277778
CHS	chr1:212649295-212798601	212742400	rs10863980	0.404762	0.36853	0.428571	ATF3	ENSG00000162772	Daur	0.444444	0.317938	0.444444
CHS	chr1:212649295-212798601	212742400	rs10863980	0.404762	0.36853	0.428571	ATF3	ENSG00000162772	Hezhen	0.388889	0.258454	0.388889
CHS	chr1:212649295-212798601	212742400	rs10863980	0.404762	0.36853	0.428571	ATF3	ENSG00000162772	JPT	0.27451	0.225703	0.284314
CHS	chr1:212649295-212798601	212742400	rs10863980	0.404762	0.36853	0.428571	ATF3	ENSG00000162772	Japanese	0.339286	0.233705	0.357143
CHS	chr1:212649295-212798601	212742400	rs10863980	0.404762	0.36853	0.428571	ATF3	ENSG00000162772	KHV	0.30303	0.284731	0.328283
CHS	chr1:212649295-212798601	212742400	rs10863980	0.404762	0.36853	0.428571	ATF3	ENSG00000162772	Karitiana	0.416667	0.328767	0.541667
CHS	chr1:212649295-212798601	212742400	rs10863980	0.404762	0.36853	0.428571	ATF3	ENSG00000162772	MXL	0.28125	0.245811	0.28125
CHS	chr1:212649295-212798601	212742400	rs10863980	0.404762	0.36853	0.428571	ATF3	ENSG00000162772	Maya	0.547619	0.540241	0.666667
CHS	chr1:212649295-212798601	212742400	rs10863980	0.404762	0.36853	0.428571	ATF3	ENSG00000162772	Miao	0.4	0.407627	0.45
CHS	chr1:212649295-212798601	212742400	rs10863980	0.404762	0.36853	0.428571	ATF3	ENSG00000162772	Mongola	0.4	0.305556	0.4
CHS	chr1:212649295-212798601	212742400	rs10863980	0.404762	0.36853	0.428571	ATF3	ENSG00000162772	Naxi	0.5	0.45873	0.5
CHS	chr1:212649295-212798601	212742400	rs10863980	0.404762	0.36853	0.428571	ATF3	ENSG00000162772	PEL	0.417647	0.421541	0.511765
CHS	chr1:212649295-212798601	212742400	rs10863980	0.404762	0.36853	0.428571	ATF3	ENSG00000162772	Pima	0.464286	0.349207	0.571429
CHS	chr1:212649295-212798601	212742400	rs10863980	0.404762	0.36853	0.428571	ATF3	ENSG00000162772	Surui	0.75	0.75	0.75
CHS	chr1:212649295-212798601	212742400	rs10863980	0.404762	0.36853	0.428571	ATF3	ENSG00000162772	Tu	0.3125	0.200868	0.375
CHS	chr1:212649295-212798601	212742400	rs10863980	0.404762	0.36853	0.428571	ATF3	ENSG00000162772	Uygur	0.25	0.239943	0.25
CHS	chr1:212649295-212798601	212742400	rs10863980	0.404762	0.36853	0.428571	ATF3	ENSG00000162772	Xibo	0.277778	0.0918274	0.333333
CHS	chr1:212649295-212798601	212742400	rs10863980	0.404762	0.36853	0.428571	ATF3	ENSG00000162772	Yakut	0.26	0.272857	0.3
CHS	chr1:212649295-212798601	212742675	rs4951613	0.404762	0.36853	0.428571	ATF3	ENSG00000162772	CHB	0.427184	0.111005	0.446602
CHS	chr1:212649295-212798601	212742675	rs4951613	0.404762	0.36853	0.428571	ATF3	ENSG00000162772	Cambodian	0.3	0.276562	0.35
CHS	chr1:212649295-212798601	212742675	rs4951613	0.404762	0.36853	0.428571	ATF3	ENSG00000162772	Colombian	0.5	0.526157	0.642857
CHS	chr1:212649295-212798601	212742675	rs4951613	0.404762	0.36853	0.428571	ATF3	ENSG00000162772	Dai	0.277778	0.186806	0.277778
CHS	chr1:212649295-212798601	212742675	rs4951613	0.404762	0.36853	0.428571	ATF3	ENSG00000162772	Daur	0.444444	0.317938	0.444444
CHS	chr1:212649295-212798601	212742675	rs4951613	0.404762	0.36853	0.428571	ATF3	ENSG00000162772	Hezhen	0.388889	0.258454	0.388889
CHS	chr1:212649295-212798601	212742675	rs4951613	0.404762	0.36853	0.428571	ATF3	ENSG00000162772	JPT	0.27451	0.225703	0.284314
CHS	chr1:212649295-212798601	212742675	rs4951613	0.404762	0.36853	0.428571	ATF3	ENSG00000162772	Japanese	0.339286	0.233705	0.357143
CHS	chr1:212649295-212798601	212742675	rs4951613	0.404762	0.36853	0.428571	ATF3	ENSG00000162772	KHV	0.30303	0.284731	0.328283
CHS	chr1:212649295-212798601	212742675	rs4951613	0.404762	0.36853	0.428571	ATF3	ENSG00000162772	Karitiana	0.416667	0.328767	0.541667
CHS	chr1:212649295-212798601	212742675	rs4951613	0.404762	0.36853	0.428571	ATF3	ENSG00000162772	MXL	0.28125	0.245811	0.28125
CHS	chr1:212649295-212798601	212742675	rs4951613	0.404762	0.36853	0.428571	ATF3	ENSG00000162772	Maya	0.547619	0.540241	0.666667
CHS	chr1:212649295-212798601	212742675	rs4951613	0.404762	0.36853	0.428571	ATF3	ENSG00000162772	Miao	0.4	0.407627	0.45
CHS	chr1:212649295-212798601	212742675	rs4951613	0.404762	0.36853	0.428571	ATF3	ENSG00000162772	Mongola	0.4	0.305556	0.4
CHS	chr1:212649295-212798601	212742675	rs4951613	0.404762	0.36853	0.428571	ATF3	ENSG00000162772	Naxi	0.5	0.45873	0.5
CHS	chr1:212649295-212798601	212742675	rs4951613	0.404762	0.36853	0.428571	ATF3	ENSG00000162772	PEL	0.417647	0.421541	0.511765
CHS	chr1:212649295-212798601	212742675	rs4951613	0.404762	0.36853	0.428571	ATF3	ENSG00000162772	Pima	0.464286	0.349207	0.571429
CHS	chr1:212649295-212798601	212742675	rs4951613	0.404762	0.36853	0.428571	ATF3	ENSG00000162772	Surui	0.75	0.75	0.75
CHS	chr1:212649295-212798601	212742675	rs4951613	0.404762	0.36853	0.428571	ATF3	ENSG00000162772	Tu	0.3125	0.200868	0.375
CHS	chr1:212649295-212798601	212742675	rs4951613	0.404762	0.36853	0.428571	ATF3	ENSG00000162772	Uygur	0.25	0.239943	0.25
CHS	chr1:212649295-212798601	212742675	rs4951613	0.404762	0.36853	0.428571	ATF3	ENSG00000162772	Xibo	0.277778	0.0918274	0.333333
CHS	chr1:212649295-212798601	212742675	rs4951613	0.404762	0.36853	0.428571	ATF3	ENSG00000162772	Yakut	0.26	0.272857	0.3
CHS	chr1:212649295-212798601	212744370	rs12038766	0.404762	0.36853	0.428571	ATF3	ENSG00000162772	CHB	0.427184	0.111005	0.446602
CHS	chr1:212649295-212798601	212744370	rs12038766	0.404762	0.36853	0.428571	ATF3	ENSG00000162772	Colombian	0.5	0.526157	0.642857
CHS	chr1:212649295-212798601	212744370	rs12038766	0.404762	0.36853	0.428571	ATF3	ENSG00000162772	Dai	0.277778	0.186806	0.277778
CHS	chr1:212649295-212798601	212744370	rs12038766	0.404762	0.36853	0.428571	ATF3	ENSG00000162772	Daur	0.444444	0.317938	0.444444
CHS	chr1:212649295-212798601	212744370	rs12038766	0.404762	0.36853	0.428571	ATF3	ENSG00000162772	Hezhen	0.388889	0.258454	0.388889
CHS	chr1:212649295-212798601	212744370	rs12038766	0.404762	0.36853	0.428571	ATF3	ENSG00000162772	JPT	0.27451	0.225703	0.284314
CHS	chr1:212649295-212798601	212744370	rs12038766	0.404762	0.36853	0.428571	ATF3	ENSG00000162772	Japanese	0.339286	0.233705	0.357143
CHS	chr1:212649295-212798601	212744370	rs12038766	0.404762	0.36853	0.428571	ATF3	ENSG00000162772	KHV	0.30303	0.284731	0.328283
CHS	chr1:212649295-212798601	212744370	rs12038766	0.404762	0.36853	0.428571	ATF3	ENSG00000162772	Karitiana	0.416667	0.328767	0.541667
CHS	chr1:212649295-212798601	212744370	rs12038766	0.404762	0.36853	0.428571	ATF3	ENSG00000162772	MXL	0.28125	0.245811	0.28125
CHS	chr1:212649295-212798601	212744370	rs12038766	0.404762	0.36853	0.428571	ATF3	ENSG00000162772	Miao	0.4	0.407627	0.45
CHS	chr1:212649295-212798601	212744370	rs12038766	0.404762	0.36853	0.428571	ATF3	ENSG00000162772	Mongola	0.4	0.305556	0.4
CHS	chr1:212649295-212798601	212744370	rs12038766	0.404762	0.36853	0.428571	ATF3	ENSG00000162772	Naxi	0.5	0.45873	0.5
CHS	chr1:212649295-212798601	212744370	rs12038766	0.404762	0.36853	0.428571	ATF3	ENSG00000162772	PEL	0.417647	0.421541	0.511765
CHS	chr1:212649295-212798601	212744370	rs12038766	0.404762	0.36853	0.428571	ATF3	ENSG00000162772	Pima	0.464286	0.349207	0.571429
CHS	chr1:212649295-212798601	212744370	rs12038766	0.404762	0.36853	0.428571	ATF3	ENSG00000162772	Surui	0.75	0.75	0.75
CHS	chr1:212649295-212798601	212744370	rs12038766	0.404762	0.36853	0.428571	ATF3	ENSG00000162772	Tu	0.3125	0.200868	0.375
CHS	chr1:212649295-212798601	212744370	rs12038766	0.404762	0.36853	0.428571	ATF3	ENSG00000162772	Uygur	0.25	0.239943	0.25
CHS	chr1:212649295-212798601	212744370	rs12038766	0.404762	0.36853	0.428571	ATF3	ENSG00000162772	Xibo	0.277778	0.0918274	0.333333
CHS	chr1:212649295-212798601	212744370	rs12038766	0.404762	0.36853	0.428571	ATF3	ENSG00000162772	Yakut	0.26	0.272857	0.3
CHS	chr1:212649295-212798601	212747722	rs11119975	0.404762	0.36853	0.428571	ATF3	ENSG00000162772	CHB	0.427184	0.111005	0.446602
CHS	chr1:212649295-212798601	212747722	rs11119975	0.404762	0.36853	0.428571	ATF3	ENSG00000162772	Colombian	0.5	0.526157	0.642857
CHS	chr1:212649295-212798601	212747722	rs11119975	0.404762	0.36853	0.428571	ATF3	ENSG00000162772	Dai	0.277778	0.186806	0.277778
CHS	chr1:212649295-212798601	212747722	rs11119975	0.404762	0.36853	0.428571	ATF3	ENSG00000162772	Daur	0.444444	0.317938	0.444444
CHS	chr1:212649295-212798601	212747722	rs11119975	0.404762	0.36853	0.428571	ATF3	ENSG00000162772	Hezhen	0.388889	0.258454	0.388889
CHS	chr1:212649295-212798601	212747722	rs11119975	0.404762	0.36853	0.428571	ATF3	ENSG00000162772	JPT	0.27451	0.225703	0.284314
CHS	chr1:212649295-212798601	212747722	rs11119975	0.404762	0.36853	0.428571	ATF3	ENSG00000162772	Japanese	0.321429	0.233705	0.357143
CHS	chr1:212649295-212798601	212747722	rs11119975	0.404762	0.36853	0.428571	ATF3	ENSG00000162772	KHV	0.30303	0.284731	0.328283
CHS	chr1:212649295-212798601	212747722	rs11119975	0.404762	0.36853	0.428571	ATF3	ENSG00000162772	Karitiana	0.416667	0.328767	0.541667
CHS	chr1:212649295-212798601	212747722	rs11119975	0.404762	0.36853	0.428571	ATF3	ENSG00000162772	MXL	0.273438	0.245811	0.28125
CHS	chr1:212649295-212798601	212747722	rs11119975	0.404762	0.36853	0.428571	ATF3	ENSG00000162772	Maya	0.547619	0.540241	0.666667
CHS	chr1:212649295-212798601	212747722	rs11119975	0.404762	0.36853	0.428571	ATF3	ENSG00000162772	Miao	0.4	0.407627	0.45
CHS	chr1:212649295-212798601	212747722	rs11119975	0.404762	0.36853	0.428571	ATF3	ENSG00000162772	Mongola	0.4	0.305556	0.4
CHS	chr1:212649295-212798601	212747722	rs11119975	0.404762	0.36853	0.428571	ATF3	ENSG00000162772	Naxi	0.5	0.45873	0.5
CHS	chr1:212649295-212798601	212747722	rs11119975	0.404762	0.36853	0.428571	ATF3	ENSG00000162772	PEL	0.411765	0.421541	0.511765
CHS	chr1:212649295-212798601	212747722	rs11119975	0.404762	0.36853	0.428571	ATF3	ENSG00000162772	Pima	0.464286	0.349207	0.571429
CHS	chr1:212649295-212798601	212747722	rs11119975	0.404762	0.36853	0.428571	ATF3	ENSG00000162772	Surui	0.75	0.75	0.75
CHS	chr1:212649295-212798601	212747722	rs11119975	0.404762	0.36853	0.428571	ATF3	ENSG00000162772	Tu	0.3125	0.200868	0.375
CHS	chr1:212649295-212798601	212747722	rs11119975	0.404762	0.36853	0.428571	ATF3	ENSG00000162772	Xibo	0.277778	0.0918274	0.333333
CHS	chr1:212649295-212798601	212747722	rs11119975	0.404762	0.36853	0.428571	ATF3	ENSG00000162772	Yakut	0.26	0.272857	0.3
Naxi	chr1:212649295-212798601	212738835	rs3806460	0.5	0.45873	0.5	ENSG00000288007	ENSG00000288007	CHB	0.427184	0.111005	0.446602
Naxi	chr1:212649295-212798601	212738835	rs3806460	0.5	0.45873	0.5	ENSG00000288007	ENSG00000288007	CHS	0.404762	0.36853	0.428571
Naxi	chr1:212649295-212798601	212738835	rs3806460	0.5	0.45873	0.5	ENSG00000288007	ENSG00000288007	Cambodian	0.3	0.276562	0.35
Naxi	chr1:212649295-212798601	212738835	rs3806460	0.5	0.45873	0.5	ENSG00000288007	ENSG00000288007	Colombian	0.5	0.526157	0.642857
Naxi	chr1:212649295-212798601	212738835	rs3806460	0.5	0.45873	0.5	ENSG00000288007	ENSG00000288007	Dai	0.277778	0.186806	0.277778
Naxi	chr1:212649295-212798601	212738835	rs3806460	0.5	0.45873	0.5	ENSG00000288007	ENSG00000288007	Daur	0.444444	0.317938	0.444444
Naxi	chr1:212649295-212798601	212738835	rs3806460	0.5	0.45873	0.5	ENSG00000288007	ENSG00000288007	Hezhen	0.388889	0.258454	0.388889
Naxi	chr1:212649295-212798601	212738835	rs3806460	0.5	0.45873	0.5	ENSG00000288007	ENSG00000288007	JPT	0.27451	0.225703	0.284314
Naxi	chr1:212649295-212798601	212738835	rs3806460	0.5	0.45873	0.5	ENSG00000288007	ENSG00000288007	Japanese	0.339286	0.233705	0.357143
Naxi	chr1:212649295-212798601	212738835	rs3806460	0.5	0.45873	0.5	ENSG00000288007	ENSG00000288007	KHV	0.30303	0.284731	0.328283
Naxi	chr1:212649295-212798601	212738835	rs3806460	0.5	0.45873	0.5	ENSG00000288007	ENSG00000288007	Karitiana	0.416667	0.328767	0.541667
Naxi	chr1:212649295-212798601	212738835	rs3806460	0.5	0.45873	0.5	ENSG00000288007	ENSG00000288007	MXL	0.28125	0.245811	0.28125
Naxi	chr1:212649295-212798601	212738835	rs3806460	0.5	0.45873	0.5	ENSG00000288007	ENSG00000288007	Maya	0.547619	0.540241	0.666667
Naxi	chr1:212649295-212798601	212738835	rs3806460	0.5	0.45873	0.5	ENSG00000288007	ENSG00000288007	Miao	0.4	0.407627	0.45
Naxi	chr1:212649295-212798601	212738835	rs3806460	0.5	0.45873	0.5	ENSG00000288007	ENSG00000288007	Mongola	0.4	0.305556	0.4
Naxi	chr1:212649295-212798601	212738835	rs3806460	0.5	0.45873	0.5	ENSG00000288007	ENSG00000288007	PEL	0.417647	0.421541	0.511765
Naxi	chr1:212649295-212798601	212738835	rs3806460	0.5	0.45873	0.5	ENSG00000288007	ENSG00000288007	Pima	0.464286	0.349207	0.571429
Naxi	chr1:212649295-212798601	212738835	rs3806460	0.5	0.45873	0.5	ENSG00000288007	ENSG00000288007	Surui	0.75	0.75	0.75
Naxi	chr1:212649295-212798601	212738835	rs3806460	0.5	0.45873	0.5	ENSG00000288007	ENSG00000288007	Tu	0.3125	0.200868	0.375
Naxi	chr1:212649295-212798601	212738835	rs3806460	0.5	0.45873	0.5	ENSG00000288007	ENSG00000288007	Uygur	0.25	0.239943	0.25
Naxi	chr1:212649295-212798601	212738835	rs3806460	0.5	0.45873	0.5	ENSG00000288007	ENSG00000288007	Xibo	0.277778	0.0918274	0.333333
Naxi	chr1:212649295-212798601	212738835	rs3806460	0.5	0.45873	0.5	ENSG00000288007	ENSG00000288007	Yakut	0.26	0.272857	0.3
Naxi	chr1:212649295-212798601	212741763	rs11119974	0.5	0.45873	0.5	ATF3	ENSG00000162772	CHB	0.427184	0.111005	0.446602
Naxi	chr1:212649295-212798601	212741763	rs11119974	0.5	0.45873	0.5	ATF3	ENSG00000162772	CHS	0.404762	0.36853	0.428571
Naxi	chr1:212649295-212798601	212741763	rs11119974	0.5	0.45873	0.5	ATF3	ENSG00000162772	Cambodian	0.3	0.276562	0.35
Naxi	chr1:212649295-212798601	212741763	rs11119974	0.5	0.45873	0.5	ATF3	ENSG00000162772	Colombian	0.5	0.526157	0.642857
Naxi	chr1:212649295-212798601	212741763	rs11119974	0.5	0.45873	0.5	ATF3	ENSG00000162772	Dai	0.277778	0.186806	0.277778
Naxi	chr1:212649295-212798601	212741763	rs11119974	0.5	0.45873	0.5	ATF3	ENSG00000162772	Daur	0.444444	0.317938	0.444444
Naxi	chr1:212649295-212798601	212741763	rs11119974	0.5	0.45873	0.5	ATF3	ENSG00000162772	Hezhen	0.388889	0.258454	0.388889
Naxi	chr1:212649295-212798601	212741763	rs11119974	0.5	0.45873	0.5	ATF3	ENSG00000162772	JPT	0.27451	0.225703	0.284314
Naxi	chr1:212649295-212798601	212741763	rs11119974	0.5	0.45873	0.5	ATF3	ENSG00000162772	Japanese	0.339286	0.233705	0.357143
Naxi	chr1:212649295-212798601	212741763	rs11119974	0.5	0.45873	0.5	ATF3	ENSG00000162772	KHV	0.30303	0.284731	0.328283
Naxi	chr1:212649295-212798601	212741763	rs11119974	0.5	0.45873	0.5	ATF3	ENSG00000162772	Karitiana	0.416667	0.328767	0.541667
Naxi	chr1:212649295-212798601	212741763	rs11119974	0.5	0.45873	0.5	ATF3	ENSG00000162772	MXL	0.28125	0.245811	0.28125
Naxi	chr1:212649295-212798601	212741763	rs11119974	0.5	0.45873	0.5	ATF3	ENSG00000162772	Maya	0.547619	0.540241	0.666667
Naxi	chr1:212649295-212798601	212741763	rs11119974	0.5	0.45873	0.5	ATF3	ENSG00000162772	Miao	0.4	0.407627	0.45
Naxi	chr1:212649295-212798601	212741763	rs11119974	0.5	0.45873	0.5	ATF3	ENSG00000162772	Mongola	0.4	0.305556	0.4
Naxi	chr1:212649295-212798601	212741763	rs11119974	0.5	0.45873	0.5	ATF3	ENSG00000162772	PEL	0.417647	0.421541	0.511765
Naxi	chr1:212649295-212798601	212741763	rs11119974	0.5	0.45873	0.5	ATF3	ENSG00000162772	Pima	0.464286	0.349207	0.571429
Naxi	chr1:212649295-212798601	212741763	rs11119974	0.5	0.45873	0.5	ATF3	ENSG00000162772	Surui	0.75	0.75	0.75
Naxi	chr1:212649295-212798601	212741763	rs11119974	0.5	0.45873	0.5	ATF3	ENSG00000162772	Tu	0.3125	0.200868	0.375
Naxi	chr1:212649295-212798601	212741763	rs11119974	0.5	0.45873	0.5	ATF3	ENSG00000162772	Uygur	0.25	0.239943	0.25
Naxi	chr1:212649295-212798601	212741763	rs11119974	0.5	0.45873	0.5	ATF3	ENSG00000162772	Xibo	0.277778	0.0918274	0.333333
Naxi	chr1:212649295-212798601	212741763	rs11119974	0.5	0.45873	0.5	ATF3	ENSG00000162772	Yakut	0.26	0.272857	0.3
Naxi	chr1:212649295-212798601	212742400	rs10863980	0.5	0.45873	0.5	ATF3	ENSG00000162772	CHB	0.427184	0.111005	0.446602
Naxi	chr1:212649295-212798601	212742400	rs10863980	0.5	0.45873	0.5	ATF3	ENSG00000162772	CHS	0.404762	0.36853	0.428571
Naxi	chr1:212649295-212798601	212742400	rs10863980	0.5	0.45873	0.5	ATF3	ENSG00000162772	Cambodian	0.3	0.276562	0.35
Naxi	chr1:212649295-212798601	212742400	rs10863980	0.5	0.45873	0.5	ATF3	ENSG00000162772	Colombian	0.5	0.526157	0.642857
Naxi	chr1:212649295-212798601	212742400	rs10863980	0.5	0.45873	0.5	ATF3	ENSG00000162772	Dai	0.277778	0.186806	0.277778
Naxi	chr1:212649295-212798601	212742400	rs10863980	0.5	0.45873	0.5	ATF3	ENSG00000162772	Daur	0.444444	0.317938	0.444444
Naxi	chr1:212649295-212798601	212742400	rs10863980	0.5	0.45873	0.5	ATF3	ENSG00000162772	Hezhen	0.388889	0.258454	0.388889
Naxi	chr1:212649295-212798601	212742400	rs10863980	0.5	0.45873	0.5	ATF3	ENSG00000162772	JPT	0.27451	0.225703	0.284314
Naxi	chr1:212649295-212798601	212742400	rs10863980	0.5	0.45873	0.5	ATF3	ENSG00000162772	Japanese	0.339286	0.233705	0.357143
Naxi	chr1:212649295-212798601	212742400	rs10863980	0.5	0.45873	0.5	ATF3	ENSG00000162772	KHV	0.30303	0.284731	0.328283
Naxi	chr1:212649295-212798601	212742400	rs10863980	0.5	0.45873	0.5	ATF3	ENSG00000162772	Karitiana	0.416667	0.328767	0.541667
Naxi	chr1:212649295-212798601	212742400	rs10863980	0.5	0.45873	0.5	ATF3	ENSG00000162772	MXL	0.28125	0.245811	0.28125
Naxi	chr1:212649295-212798601	212742400	rs10863980	0.5	0.45873	0.5	ATF3	ENSG00000162772	Maya	0.547619	0.540241	0.666667
Naxi	chr1:212649295-212798601	212742400	rs10863980	0.5	0.45873	0.5	ATF3	ENSG00000162772	Miao	0.4	0.407627	0.45
Naxi	chr1:212649295-212798601	212742400	rs10863980	0.5	0.45873	0.5	ATF3	ENSG00000162772	Mongola	0.4	0.305556	0.4
Naxi	chr1:212649295-212798601	212742400	rs10863980	0.5	0.45873	0.5	ATF3	ENSG00000162772	PEL	0.417647	0.421541	0.511765
Naxi	chr1:212649295-212798601	212742400	rs10863980	0.5	0.45873	0.5	ATF3	ENSG00000162772	Pima	0.464286	0.349207	0.571429
Naxi	chr1:212649295-212798601	212742400	rs10863980	0.5	0.45873	0.5	ATF3	ENSG00000162772	Surui	0.75	0.75	0.75
Naxi	chr1:212649295-212798601	212742400	rs10863980	0.5	0.45873	0.5	ATF3	ENSG00000162772	Tu	0.3125	0.200868	0.375
Naxi	chr1:212649295-212798601	212742400	rs10863980	0.5	0.45873	0.5	ATF3	ENSG00000162772	Uygur	0.25	0.239943	0.25
Naxi	chr1:212649295-212798601	212742400	rs10863980	0.5	0.45873	0.5	ATF3	ENSG00000162772	Xibo	0.277778	0.0918274	0.333333
Naxi	chr1:212649295-212798601	212742400	rs10863980	0.5	0.45873	0.5	ATF3	ENSG00000162772	Yakut	0.26	0.272857	0.3
Naxi	chr1:212649295-212798601	212742675	rs4951613	0.5	0.45873	0.5	ATF3	ENSG00000162772	CHB	0.427184	0.111005	0.446602
Naxi	chr1:212649295-212798601	212742675	rs4951613	0.5	0.45873	0.5	ATF3	ENSG00000162772	CHS	0.404762	0.36853	0.428571
Naxi	chr1:212649295-212798601	212742675	rs4951613	0.5	0.45873	0.5	ATF3	ENSG00000162772	Cambodian	0.3	0.276562	0.35
Naxi	chr1:212649295-212798601	212742675	rs4951613	0.5	0.45873	0.5	ATF3	ENSG00000162772	Colombian	0.5	0.526157	0.642857
Naxi	chr1:212649295-212798601	212742675	rs4951613	0.5	0.45873	0.5	ATF3	ENSG00000162772	Dai	0.277778	0.186806	0.277778
Naxi	chr1:212649295-212798601	212742675	rs4951613	0.5	0.45873	0.5	ATF3	ENSG00000162772	Daur	0.444444	0.317938	0.444444
Naxi	chr1:212649295-212798601	212742675	rs4951613	0.5	0.45873	0.5	ATF3	ENSG00000162772	Hezhen	0.388889	0.258454	0.388889
Naxi	chr1:212649295-212798601	212742675	rs4951613	0.5	0.45873	0.5	ATF3	ENSG00000162772	JPT	0.27451	0.225703	0.284314
Naxi	chr1:212649295-212798601	212742675	rs4951613	0.5	0.45873	0.5	ATF3	ENSG00000162772	Japanese	0.339286	0.233705	0.357143
Naxi	chr1:212649295-212798601	212742675	rs4951613	0.5	0.45873	0.5	ATF3	ENSG00000162772	KHV	0.30303	0.284731	0.328283
Naxi	chr1:212649295-212798601	212742675	rs4951613	0.5	0.45873	0.5	ATF3	ENSG00000162772	Karitiana	0.416667	0.328767	0.541667
Naxi	chr1:212649295-212798601	212742675	rs4951613	0.5	0.45873	0.5	ATF3	ENSG00000162772	MXL	0.28125	0.245811	0.28125
Naxi	chr1:212649295-212798601	212742675	rs4951613	0.5	0.45873	0.5	ATF3	ENSG00000162772	Maya	0.547619	0.540241	0.666667
Naxi	chr1:212649295-212798601	212742675	rs4951613	0.5	0.45873	0.5	ATF3	ENSG00000162772	Miao	0.4	0.407627	0.45
Naxi	chr1:212649295-212798601	212742675	rs4951613	0.5	0.45873	0.5	ATF3	ENSG00000162772	Mongola	0.4	0.305556	0.4
Naxi	chr1:212649295-212798601	212742675	rs4951613	0.5	0.45873	0.5	ATF3	ENSG00000162772	PEL	0.417647	0.421541	0.511765
Naxi	chr1:212649295-212798601	212742675	rs4951613	0.5	0.45873	0.5	ATF3	ENSG00000162772	Pima	0.464286	0.349207	0.571429
Naxi	chr1:212649295-212798601	212742675	rs4951613	0.5	0.45873	0.5	ATF3	ENSG00000162772	Surui	0.75	0.75	0.75
Naxi	chr1:212649295-212798601	212742675	rs4951613	0.5	0.45873	0.5	ATF3	ENSG00000162772	Tu	0.3125	0.200868	0.375
Naxi	chr1:212649295-212798601	212742675	rs4951613	0.5	0.45873	0.5	ATF3	ENSG00000162772	Uygur	0.25	0.239943	0.25
Naxi	chr1:212649295-212798601	212742675	rs4951613	0.5	0.45873	0.5	ATF3	ENSG00000162772	Xibo	0.277778	0.0918274	0.333333
Naxi	chr1:212649295-212798601	212742675	rs4951613	0.5	0.45873	0.5	ATF3	ENSG00000162772	Yakut	0.26	0.272857	0.3
Naxi	chr1:212649295-212798601	212744370	rs12038766	0.5	0.45873	0.5	ATF3	ENSG00000162772	CHB	0.427184	0.111005	0.446602
Naxi	chr1:212649295-212798601	212744370	rs12038766	0.5	0.45873	0.5	ATF3	ENSG00000162772	CHS	0.404762	0.36853	0.428571
Naxi	chr1:212649295-212798601	212744370	rs12038766	0.5	0.45873	0.5	ATF3	ENSG00000162772	Colombian	0.5	0.526157	0.642857
Naxi	chr1:212649295-212798601	212744370	rs12038766	0.5	0.45873	0.5	ATF3	ENSG00000162772	Dai	0.277778	0.186806	0.277778
Naxi	chr1:212649295-212798601	212744370	rs12038766	0.5	0.45873	0.5	ATF3	ENSG00000162772	Daur	0.444444	0.317938	0.444444
Naxi	chr1:212649295-212798601	212744370	rs12038766	0.5	0.45873	0.5	ATF3	ENSG00000162772	Hezhen	0.388889	0.258454	0.388889
Naxi	chr1:212649295-212798601	212744370	rs12038766	0.5	0.45873	0.5	ATF3	ENSG00000162772	JPT	0.27451	0.225703	0.284314
Naxi	chr1:212649295-212798601	212744370	rs12038766	0.5	0.45873	0.5	ATF3	ENSG00000162772	Japanese	0.339286	0.233705	0.357143
Naxi	chr1:212649295-212798601	212744370	rs12038766	0.5	0.45873	0.5	ATF3	ENSG00000162772	KHV	0.30303	0.284731	0.328283
Naxi	chr1:212649295-212798601	212744370	rs12038766	0.5	0.45873	0.5	ATF3	ENSG00000162772	Karitiana	0.416667	0.328767	0.541667
Naxi	chr1:212649295-212798601	212744370	rs12038766	0.5	0.45873	0.5	ATF3	ENSG00000162772	MXL	0.28125	0.245811	0.28125
Naxi	chr1:212649295-212798601	212744370	rs12038766	0.5	0.45873	0.5	ATF3	ENSG00000162772	Miao	0.4	0.407627	0.45
Naxi	chr1:212649295-212798601	212744370	rs12038766	0.5	0.45873	0.5	ATF3	ENSG00000162772	Mongola	0.4	0.305556	0.4
Naxi	chr1:212649295-212798601	212744370	rs12038766	0.5	0.45873	0.5	ATF3	ENSG00000162772	PEL	0.417647	0.421541	0.511765
Naxi	chr1:212649295-212798601	212744370	rs12038766	0.5	0.45873	0.5	ATF3	ENSG00000162772	Pima	0.464286	0.349207	0.571429
Naxi	chr1:212649295-212798601	212744370	rs12038766	0.5	0.45873	0.5	ATF3	ENSG00000162772	Surui	0.75	0.75	0.75
Naxi	chr1:212649295-212798601	212744370	rs12038766	0.5	0.45873	0.5	ATF3	ENSG00000162772	Tu	0.3125	0.200868	0.375
Naxi	chr1:212649295-212798601	212744370	rs12038766	0.5	0.45873	0.5	ATF3	ENSG00000162772	Uygur	0.25	0.239943	0.25
Naxi	chr1:212649295-212798601	212744370	rs12038766	0.5	0.45873	0.5	ATF3	ENSG00000162772	Xibo	0.277778	0.0918274	0.333333
Naxi	chr1:212649295-212798601	212744370	rs12038766	0.5	0.45873	0.5	ATF3	ENSG00000162772	Yakut	0.26	0.272857	0.3
Naxi	chr1:212649295-212798601	212747722	rs11119975	0.5	0.45873	0.5	ATF3	ENSG00000162772	CHB	0.427184	0.111005	0.446602
Naxi	chr1:212649295-212798601	212747722	rs11119975	0.5	0.45873	0.5	ATF3	ENSG00000162772	CHS	0.404762	0.36853	0.428571
Naxi	chr1:212649295-212798601	212747722	rs11119975	0.5	0.45873	0.5	ATF3	ENSG00000162772	Colombian	0.5	0.526157	0.642857
Naxi	chr1:212649295-212798601	212747722	rs11119975	0.5	0.45873	0.5	ATF3	ENSG00000162772	Dai	0.277778	0.186806	0.277778
Naxi	chr1:212649295-212798601	212747722	rs11119975	0.5	0.45873	0.5	ATF3	ENSG00000162772	Daur	0.444444	0.317938	0.444444
Naxi	chr1:212649295-212798601	212747722	rs11119975	0.5	0.45873	0.5	ATF3	ENSG00000162772	Hezhen	0.388889	0.258454	0.388889
Naxi	chr1:212649295-212798601	212747722	rs11119975	0.5	0.45873	0.5	ATF3	ENSG00000162772	JPT	0.27451	0.225703	0.284314
Naxi	chr1:212649295-212798601	212747722	rs11119975	0.5	0.45873	0.5	ATF3	ENSG00000162772	Japanese	0.321429	0.233705	0.357143
Naxi	chr1:212649295-212798601	212747722	rs11119975	0.5	0.45873	0.5	ATF3	ENSG00000162772	KHV	0.30303	0.284731	0.328283
Naxi	chr1:212649295-212798601	212747722	rs11119975	0.5	0.45873	0.5	ATF3	ENSG00000162772	Karitiana	0.416667	0.328767	0.541667
Naxi	chr1:212649295-212798601	212747722	rs11119975	0.5	0.45873	0.5	ATF3	ENSG00000162772	MXL	0.273438	0.245811	0.28125
Naxi	chr1:212649295-212798601	212747722	rs11119975	0.5	0.45873	0.5	ATF3	ENSG00000162772	Maya	0.547619	0.540241	0.666667
Naxi	chr1:212649295-212798601	212747722	rs11119975	0.5	0.45873	0.5	ATF3	ENSG00000162772	Miao	0.4	0.407627	0.45
Naxi	chr1:212649295-212798601	212747722	rs11119975	0.5	0.45873	0.5	ATF3	ENSG00000162772	Mongola	0.4	0.305556	0.4
Naxi	chr1:212649295-212798601	212747722	rs11119975	0.5	0.45873	0.5	ATF3	ENSG00000162772	PEL	0.411765	0.421541	0.511765
Naxi	chr1:212649295-212798601	212747722	rs11119975	0.5	0.45873	0.5	ATF3	ENSG00000162772	Pima	0.464286	0.349207	0.571429
Naxi	chr1:212649295-212798601	212747722	rs11119975	0.5	0.45873	0.5	ATF3	ENSG00000162772	Surui	0.75	0.75	0.75
Naxi	chr1:212649295-212798601	212747722	rs11119975	0.5	0.45873	0.5	ATF3	ENSG00000162772	Tu	0.3125	0.200868	0.375
Naxi	chr1:212649295-212798601	212747722	rs11119975	0.5	0.45873	0.5	ATF3	ENSG00000162772	Xibo	0.277778	0.0918274	0.333333
Naxi	chr1:212649295-212798601	212747722	rs11119975	0.5	0.45873	0.5	ATF3	ENSG00000162772	Yakut	0.26	0.272857	0.3
Naxi	chr1:212649295-212798601	212751634	rs11119977	0.5	0.45873	0.5	ATF3	ENSG00000162772	CHB	0.364078	0.111005	0.446602
Naxi	chr1:212649295-212798601	212751634	rs11119977	0.5	0.45873	0.5	ATF3	ENSG00000162772	CHS	0.371429	0.36853	0.428571
Naxi	chr1:212649295-212798601	212751634	rs11119977	0.5	0.45873	0.5	ATF3	ENSG00000162772	Cambodian	0.3	0.276562	0.35
Naxi	chr1:212649295-212798601	212751634	rs11119977	0.5	0.45873	0.5	ATF3	ENSG00000162772	Colombian	0.5	0.526157	0.642857
Naxi	chr1:212649295-212798601	212751634	rs11119977	0.5	0.45873	0.5	ATF3	ENSG00000162772	Dai	0.277778	0.186806	0.277778
Naxi	chr1:212649295-212798601	212751634	rs11119977	0.5	0.45873	0.5	ATF3	ENSG00000162772	Daur	0.444444	0.317938	0.444444
Naxi	chr1:212649295-212798601	212751634	rs11119977	0.5	0.45873	0.5	ATF3	ENSG00000162772	Hezhen	0.277778	0.258454	0.388889
Naxi	chr1:212649295-212798601	212751634	rs11119977	0.5	0.45873	0.5	ATF3	ENSG00000162772	JPT	0.245098	0.225703	0.284314
Naxi	chr1:212649295-212798601	212751634	rs11119977	0.5	0.45873	0.5	ATF3	ENSG00000162772	Japanese	0.25	0.233705	0.357143
Naxi	chr1:212649295-212798601	212751634	rs11119977	0.5	0.45873	0.5	ATF3	ENSG00000162772	KHV	0.287879	0.284731	0.328283
Naxi	chr1:212649295-212798601	212751634	rs11119977	0.5	0.45873	0.5	ATF3	ENSG00000162772	Karitiana	0.416667	0.328767	0.541667
Naxi	chr1:212649295-212798601	212751634	rs11119977	0.5	0.45873	0.5	ATF3	ENSG00000162772	MXL	0.273438	0.245811	0.28125
Naxi	chr1:212649295-212798601	212751634	rs11119977	0.5	0.45873	0.5	ATF3	ENSG00000162772	Maya	0.547619	0.540241	0.666667
Naxi	chr1:212649295-212798601	212751634	rs11119977	0.5	0.45873	0.5	ATF3	ENSG00000162772	Miao	0.35	0.407627	0.45
Naxi	chr1:212649295-212798601	212751634	rs11119977	0.5	0.45873	0.5	ATF3	ENSG00000162772	Mongola	0.4	0.305556	0.4
Naxi	chr1:212649295-212798601	212751634	rs11119977	0.5	0.45873	0.5	ATF3	ENSG00000162772	PEL	0.411765	0.421541	0.511765
Naxi	chr1:212649295-212798601	212751634	rs11119977	0.5	0.45873	0.5	ATF3	ENSG00000162772	Pima	0.464286	0.349207	0.571429
Naxi	chr1:212649295-212798601	212751634	rs11119977	0.5	0.45873	0.5	ATF3	ENSG00000162772	Surui	0.75	0.75	0.75
Naxi	chr1:212649295-212798601	212751634	rs11119977	0.5	0.45873	0.5	ATF3	ENSG00000162772	Tu	0.3125	0.200868	0.375
Naxi	chr1:212649295-212798601	212751634	rs11119977	0.5	0.45873	0.5	ATF3	ENSG00000162772	Xibo	0.277778	0.0918274	0.333333
Naxi	chr1:212649295-212798601	212751634	rs11119977	0.5	0.45873	0.5	ATF3	ENSG00000162772	Yakut	0.26	0.272857	0.3
Naxi	chr1:212649295-212798601	212756363	rs10863981	0.5	0.45873	0.5	ATF3	ENSG00000162772	CHB	0.359223	0.111005	0.446602
Naxi	chr1:212649295-212798601	212756363	rs10863981	0.5	0.45873	0.5	ATF3	ENSG00000162772	CHS	0.371429	0.36853	0.428571
Naxi	chr1:212649295-212798601	212756363	rs10863981	0.5	0.45873	0.5	ATF3	ENSG00000162772	Cambodian	0.3	0.276562	0.35
Naxi	chr1:212649295-212798601	212756363	rs10863981	0.5	0.45873	0.5	ATF3	ENSG00000162772	Colombian	0.5	0.526157	0.642857
Naxi	chr1:212649295-212798601	212756363	rs10863981	0.5	0.45873	0.5	ATF3	ENSG00000162772	Dai	0.277778	0.186806	0.277778
Naxi	chr1:212649295-212798601	212756363	rs10863981	0.5	0.45873	0.5	ATF3	ENSG00000162772	Daur	0.444444	0.317938	0.444444
Naxi	chr1:212649295-212798601	212756363	rs10863981	0.5	0.45873	0.5	ATF3	ENSG00000162772	Hezhen	0.277778	0.258454	0.388889
Naxi	chr1:212649295-212798601	212756363	rs10863981	0.5	0.45873	0.5	ATF3	ENSG00000162772	JPT	0.245098	0.225703	0.284314
Naxi	chr1:212649295-212798601	212756363	rs10863981	0.5	0.45873	0.5	ATF3	ENSG00000162772	Japanese	0.25	0.233705	0.357143
Naxi	chr1:212649295-212798601	212756363	rs10863981	0.5	0.45873	0.5	ATF3	ENSG00000162772	KHV	0.287879	0.284731	0.328283
Naxi	chr1:212649295-212798601	212756363	rs10863981	0.5	0.45873	0.5	ATF3	ENSG00000162772	Karitiana	0.416667	0.328767	0.541667
Naxi	chr1:212649295-212798601	212756363	rs10863981	0.5	0.45873	0.5	ATF3	ENSG00000162772	MXL	0.273438	0.245811	0.28125
Naxi	chr1:212649295-212798601	212756363	rs10863981	0.5	0.45873	0.5	ATF3	ENSG00000162772	Maya	0.547619	0.540241	0.666667
Naxi	chr1:212649295-212798601	212756363	rs10863981	0.5	0.45873	0.5	ATF3	ENSG00000162772	Miao	0.35	0.407627	0.45
Naxi	chr1:212649295-212798601	212756363	rs10863981	0.5	0.45873	0.5	ATF3	ENSG00000162772	Mongola	0.4	0.305556	0.4
Naxi	chr1:212649295-212798601	212756363	rs10863981	0.5	0.45873	0.5	ATF3	ENSG00000162772	PEL	0.411765	0.421541	0.511765
Naxi	chr1:212649295-212798601	212756363	rs10863981	0.5	0.45873	0.5	ATF3	ENSG00000162772	Pima	0.464286	0.349207	0.571429
Naxi	chr1:212649295-212798601	212756363	rs10863981	0.5	0.45873	0.5	ATF3	ENSG00000162772	Surui	0.75	0.75	0.75
Naxi	chr1:212649295-212798601	212756363	rs10863981	0.5	0.45873	0.5	ATF3	ENSG00000162772	Tu	0.3125	0.200868	0.375
Naxi	chr1:212649295-212798601	212756363	rs10863981	0.5	0.45873	0.5	ATF3	ENSG00000162772	Xibo	0.277778	0.0918274	0.333333
Naxi	chr1:212649295-212798601	212756363	rs10863981	0.5	0.45873	0.5	ATF3	ENSG00000162772	Yakut	0.26	0.272857	0.3
Naxi	chr1:212649295-212798601	212758392	rs4951618	0.5	0.45873	0.5	ATF3	ENSG00000162772	CHB	0.354369	0.111005	0.446602
Naxi	chr1:212649295-212798601	212758392	rs4951618	0.5	0.45873	0.5	ATF3	ENSG00000162772	CHS	0.380952	0.36853	0.428571
Naxi	chr1:212649295-212798601	212758392	rs4951618	0.5	0.45873	0.5	ATF3	ENSG00000162772	Cambodian	0.3	0.276562	0.35
Naxi	chr1:212649295-212798601	212758392	rs4951618	0.5	0.45873	0.5	ATF3	ENSG00000162772	Colombian	0.5	0.526157	0.642857
Naxi	chr1:212649295-212798601	212758392	rs4951618	0.5	0.45873	0.5	ATF3	ENSG00000162772	Dai	0.277778	0.186806	0.277778
Naxi	chr1:212649295-212798601	212758392	rs4951618	0.5	0.45873	0.5	ATF3	ENSG00000162772	Daur	0.444444	0.317938	0.444444
Naxi	chr1:212649295-212798601	212758392	rs4951618	0.5	0.45873	0.5	ATF3	ENSG00000162772	Hezhen	0.277778	0.258454	0.388889
Naxi	chr1:212649295-212798601	212758392	rs4951618	0.5	0.45873	0.5	ATF3	ENSG00000162772	JPT	0.254902	0.225703	0.284314
Naxi	chr1:212649295-212798601	212758392	rs4951618	0.5	0.45873	0.5	ATF3	ENSG00000162772	Japanese	0.285714	0.233705	0.357143
Naxi	chr1:212649295-212798601	212758392	rs4951618	0.5	0.45873	0.5	ATF3	ENSG00000162772	KHV	0.287879	0.284731	0.328283
Naxi	chr1:212649295-212798601	212758392	rs4951618	0.5	0.45873	0.5	ATF3	ENSG00000162772	Karitiana	0.541667	0.328767	0.541667
Naxi	chr1:212649295-212798601	212758392	rs4951618	0.5	0.45873	0.5	ATF3	ENSG00000162772	MXL	0.273438	0.245811	0.28125
Naxi	chr1:212649295-212798601	212758392	rs4951618	0.5	0.45873	0.5	ATF3	ENSG00000162772	Maya	0.571429	0.540241	0.666667
Naxi	chr1:212649295-212798601	212758392	rs4951618	0.5	0.45873	0.5	ATF3	ENSG00000162772	Miao	0.35	0.407627	0.45
Naxi	chr1:212649295-212798601	212758392	rs4951618	0.5	0.45873	0.5	ATF3	ENSG00000162772	Mongola	0.35	0.305556	0.4
Naxi	chr1:212649295-212798601	212758392	rs4951618	0.5	0.45873	0.5	ATF3	ENSG00000162772	PEL	0.405882	0.421541	0.511765
Naxi	chr1:212649295-212798601	212758392	rs4951618	0.5	0.45873	0.5	ATF3	ENSG00000162772	PUR	0.225962	0.169384	0.225962
Naxi	chr1:212649295-212798601	212758392	rs4951618	0.5	0.45873	0.5	ATF3	ENSG00000162772	Pima	0.571429	0.349207	0.571429
Naxi	chr1:212649295-212798601	212758392	rs4951618	0.5	0.45873	0.5	ATF3	ENSG00000162772	Surui	0.75	0.75	0.75
Naxi	chr1:212649295-212798601	212758392	rs4951618	0.5	0.45873	0.5	ATF3	ENSG00000162772	Tu	0.3125	0.200868	0.375
Naxi	chr1:212649295-212798601	212758392	rs4951618	0.5	0.45873	0.5	ATF3	ENSG00000162772	Xibo	0.222222	0.0918274	0.333333
Naxi	chr1:212649295-212798601	212758392	rs4951618	0.5	0.45873	0.5	ATF3	ENSG00000162772	Yakut	0.26	0.272857	0.3
Naxi	chr1:212649295-212798601	212758604	rs1105899	0.5	0.45873	0.5	ATF3	ENSG00000162772	CHB	0.354369	0.111005	0.446602
Naxi	chr1:212649295-212798601	212758604	rs1105899	0.5	0.45873	0.5	ATF3	ENSG00000162772	CHS	0.395238	0.36853	0.428571
Naxi	chr1:212649295-212798601	212758604	rs1105899	0.5	0.45873	0.5	ATF3	ENSG00000162772	Colombian	0.5	0.526157	0.642857
Naxi	chr1:212649295-212798601	212758604	rs1105899	0.5	0.45873	0.5	ATF3	ENSG00000162772	Dai	0.277778	0.186806	0.277778
Naxi	chr1:212649295-212798601	212758604	rs1105899	0.5	0.45873	0.5	ATF3	ENSG00000162772	Daur	0.388889	0.317938	0.444444
Naxi	chr1:212649295-212798601	212758604	rs1105899	0.5	0.45873	0.5	ATF3	ENSG00000162772	JPT	0.264706	0.225703	0.284314
Naxi	chr1:212649295-212798601	212758604	rs1105899	0.5	0.45873	0.5	ATF3	ENSG00000162772	Japanese	0.339286	0.233705	0.357143
Naxi	chr1:212649295-212798601	212758604	rs1105899	0.5	0.45873	0.5	ATF3	ENSG00000162772	KHV	0.277778	0.284731	0.328283
Naxi	chr1:212649295-212798601	212758604	rs1105899	0.5	0.45873	0.5	ATF3	ENSG00000162772	Karitiana	0.541667	0.328767	0.541667
Naxi	chr1:212649295-212798601	212758604	rs1105899	0.5	0.45873	0.5	ATF3	ENSG00000162772	Maya	0.571429	0.540241	0.666667
Naxi	chr1:212649295-212798601	212758604	rs1105899	0.5	0.45873	0.5	ATF3	ENSG00000162772	Miao	0.35	0.407627	0.45
Naxi	chr1:212649295-212798601	212758604	rs1105899	0.5	0.45873	0.5	ATF3	ENSG00000162772	Mongola	0.35	0.305556	0.4
Naxi	chr1:212649295-212798601	212758604	rs1105899	0.5	0.45873	0.5	ATF3	ENSG00000162772	PEL	0.394118	0.421541	0.511765
Naxi	chr1:212649295-212798601	212758604	rs1105899	0.5	0.45873	0.5	ATF3	ENSG00000162772	Pima	0.5	0.349207	0.571429
Naxi	chr1:212649295-212798601	212758604	rs1105899	0.5	0.45873	0.5	ATF3	ENSG00000162772	Surui	0.75	0.75	0.75
Naxi	chr1:212649295-212798601	212758604	rs1105899	0.5	0.45873	0.5	ATF3	ENSG00000162772	Tu	0.25	0.200868	0.375
Naxi	chr1:212649295-212798601	212758604	rs1105899	0.5	0.45873	0.5	ATF3	ENSG00000162772	Xibo	0.222222	0.0918274	0.333333
Naxi	chr1:212649295-212798601	212758604	rs1105899	0.5	0.45873	0.5	ATF3	ENSG00000162772	Yakut	0.26	0.272857	0.3
Naxi	chr1:212649295-212798601	212759493	rs6674072	0.5	0.45873	0.5	ATF3	ENSG00000162772	CHB	0.334951	0.111005	0.446602
Naxi	chr1:212649295-212798601	212759493	rs6674072	0.5	0.45873	0.5	ATF3	ENSG00000162772	CHS	0.371429	0.36853	0.428571
Naxi	chr1:212649295-212798601	212759493	rs6674072	0.5	0.45873	0.5	ATF3	ENSG00000162772	Cambodian	0.25	0.276562	0.35
Naxi	chr1:212649295-212798601	212759493	rs6674072	0.5	0.45873	0.5	ATF3	ENSG00000162772	Colombian	0.5	0.526157	0.642857
Naxi	chr1:212649295-212798601	212759493	rs6674072	0.5	0.45873	0.5	ATF3	ENSG00000162772	Dai	0.277778	0.186806	0.277778
Naxi	chr1:212649295-212798601	212759493	rs6674072	0.5	0.45873	0.5	ATF3	ENSG00000162772	Daur	0.444444	0.317938	0.444444
Naxi	chr1:212649295-212798601	212759493	rs6674072	0.5	0.45873	0.5	ATF3	ENSG00000162772	Hezhen	0.277778	0.258454	0.388889
Naxi	chr1:212649295-212798601	212759493	rs6674072	0.5	0.45873	0.5	ATF3	ENSG00000162772	JPT	0.254902	0.225703	0.284314
Naxi	chr1:212649295-212798601	212759493	rs6674072	0.5	0.45873	0.5	ATF3	ENSG00000162772	Japanese	0.303571	0.233705	0.357143
Naxi	chr1:212649295-212798601	212759493	rs6674072	0.5	0.45873	0.5	ATF3	ENSG00000162772	KHV	0.277778	0.284731	0.328283
Naxi	chr1:212649295-212798601	212759493	rs6674072	0.5	0.45873	0.5	ATF3	ENSG00000162772	Karitiana	0.541667	0.328767	0.541667
Naxi	chr1:212649295-212798601	212759493	rs6674072	0.5	0.45873	0.5	ATF3	ENSG00000162772	MXL	0.273438	0.245811	0.28125
Naxi	chr1:212649295-212798601	212759493	rs6674072	0.5	0.45873	0.5	ATF3	ENSG00000162772	Maya	0.571429	0.540241	0.666667
Naxi	chr1:212649295-212798601	212759493	rs6674072	0.5	0.45873	0.5	ATF3	ENSG00000162772	Miao	0.35	0.407627	0.45
Naxi	chr1:212649295-212798601	212759493	rs6674072	0.5	0.45873	0.5	ATF3	ENSG00000162772	Mongola	0.35	0.305556	0.4
Naxi	chr1:212649295-212798601	212759493	rs6674072	0.5	0.45873	0.5	ATF3	ENSG00000162772	PEL	0.405882	0.421541	0.511765
Naxi	chr1:212649295-212798601	212759493	rs6674072	0.5	0.45873	0.5	ATF3	ENSG00000162772	Pima	0.464286	0.349207	0.571429
Naxi	chr1:212649295-212798601	212759493	rs6674072	0.5	0.45873	0.5	ATF3	ENSG00000162772	Surui	0.75	0.75	0.75
Naxi	chr1:212649295-212798601	212759493	rs6674072	0.5	0.45873	0.5	ATF3	ENSG00000162772	Tu	0.25	0.200868	0.375
Naxi	chr1:212649295-212798601	212759493	rs6674072	0.5	0.45873	0.5	ATF3	ENSG00000162772	Xibo	0.277778	0.0918274	0.333333
Naxi	chr1:212649295-212798601	212759493	rs6674072	0.5	0.45873	0.5	ATF3	ENSG00000162772	Yakut	0.28	0.272857	0.3
Mongola	chr1:212649295-212811057	212738835	rs3806460	0.4	0.305556	0.4	ENSG00000288007	ENSG00000288007	CHB	0.427184	0.111005	0.446602
Mongola	chr1:212649295-212811057	212738835	rs3806460	0.4	0.305556	0.4	ENSG00000288007	ENSG00000288007	CHS	0.404762	0.36853	0.428571
Mongola	chr1:212649295-212811057	212738835	rs3806460	0.4	0.305556	0.4	ENSG00000288007	ENSG00000288007	Cambodian	0.3	0.276562	0.35
Mongola	chr1:212649295-212811057	212738835	rs3806460	0.4	0.305556	0.4	ENSG00000288007	ENSG00000288007	Colombian	0.5	0.526157	0.642857
Mongola	chr1:212649295-212811057	212738835	rs3806460	0.4	0.305556	0.4	ENSG00000288007	ENSG00000288007	Dai	0.277778	0.186806	0.277778
Mongola	chr1:212649295-212811057	212738835	rs3806460	0.4	0.305556	0.4	ENSG00000288007	ENSG00000288007	Daur	0.444444	0.317938	0.444444
Mongola	chr1:212649295-212811057	212738835	rs3806460	0.4	0.305556	0.4	ENSG00000288007	ENSG00000288007	Hezhen	0.388889	0.258454	0.388889
Mongola	chr1:212649295-212811057	212738835	rs3806460	0.4	0.305556	0.4	ENSG00000288007	ENSG00000288007	JPT	0.27451	0.225703	0.284314
Mongola	chr1:212649295-212811057	212738835	rs3806460	0.4	0.305556	0.4	ENSG00000288007	ENSG00000288007	Japanese	0.339286	0.233705	0.357143
Mongola	chr1:212649295-212811057	212738835	rs3806460	0.4	0.305556	0.4	ENSG00000288007	ENSG00000288007	KHV	0.30303	0.284731	0.328283
Mongola	chr1:212649295-212811057	212738835	rs3806460	0.4	0.305556	0.4	ENSG00000288007	ENSG00000288007	Karitiana	0.416667	0.328767	0.541667
Mongola	chr1:212649295-212811057	212738835	rs3806460	0.4	0.305556	0.4	ENSG00000288007	ENSG00000288007	MXL	0.28125	0.245811	0.28125
Mongola	chr1:212649295-212811057	212738835	rs3806460	0.4	0.305556	0.4	ENSG00000288007	ENSG00000288007	Maya	0.547619	0.540241	0.666667
Mongola	chr1:212649295-212811057	212738835	rs3806460	0.4	0.305556	0.4	ENSG00000288007	ENSG00000288007	Miao	0.4	0.407627	0.45
Mongola	chr1:212649295-212811057	212738835	rs3806460	0.4	0.305556	0.4	ENSG00000288007	ENSG00000288007	Naxi	0.5	0.45873	0.5
Mongola	chr1:212649295-212811057	212738835	rs3806460	0.4	0.305556	0.4	ENSG00000288007	ENSG00000288007	PEL	0.417647	0.421541	0.511765
Mongola	chr1:212649295-212811057	212738835	rs3806460	0.4	0.305556	0.4	ENSG00000288007	ENSG00000288007	Pima	0.464286	0.349207	0.571429
Mongola	chr1:212649295-212811057	212738835	rs3806460	0.4	0.305556	0.4	ENSG00000288007	ENSG00000288007	Surui	0.75	0.75	0.75
Mongola	chr1:212649295-212811057	212738835	rs3806460	0.4	0.305556	0.4	ENSG00000288007	ENSG00000288007	Tu	0.3125	0.200868	0.375
Mongola	chr1:212649295-212811057	212738835	rs3806460	0.4	0.305556	0.4	ENSG00000288007	ENSG00000288007	Uygur	0.25	0.239943	0.25
Mongola	chr1:212649295-212811057	212738835	rs3806460	0.4	0.305556	0.4	ENSG00000288007	ENSG00000288007	Xibo	0.277778	0.0918274	0.333333
Mongola	chr1:212649295-212811057	212738835	rs3806460	0.4	0.305556	0.4	ENSG00000288007	ENSG00000288007	Yakut	0.26	0.272857	0.3
Mongola	chr1:212649295-212811057	212741763	rs11119974	0.4	0.305556	0.4	ATF3	ENSG00000162772	CHB	0.427184	0.111005	0.446602
Mongola	chr1:212649295-212811057	212741763	rs11119974	0.4	0.305556	0.4	ATF3	ENSG00000162772	CHS	0.404762	0.36853	0.428571
Mongola	chr1:212649295-212811057	212741763	rs11119974	0.4	0.305556	0.4	ATF3	ENSG00000162772	Cambodian	0.3	0.276562	0.35
Mongola	chr1:212649295-212811057	212741763	rs11119974	0.4	0.305556	0.4	ATF3	ENSG00000162772	Colombian	0.5	0.526157	0.642857
Mongola	chr1:212649295-212811057	212741763	rs11119974	0.4	0.305556	0.4	ATF3	ENSG00000162772	Dai	0.277778	0.186806	0.277778
Mongola	chr1:212649295-212811057	212741763	rs11119974	0.4	0.305556	0.4	ATF3	ENSG00000162772	Daur	0.444444	0.317938	0.444444
Mongola	chr1:212649295-212811057	212741763	rs11119974	0.4	0.305556	0.4	ATF3	ENSG00000162772	Hezhen	0.388889	0.258454	0.388889
Mongola	chr1:212649295-212811057	212741763	rs11119974	0.4	0.305556	0.4	ATF3	ENSG00000162772	JPT	0.27451	0.225703	0.284314
Mongola	chr1:212649295-212811057	212741763	rs11119974	0.4	0.305556	0.4	ATF3	ENSG00000162772	Japanese	0.339286	0.233705	0.357143
Mongola	chr1:212649295-212811057	212741763	rs11119974	0.4	0.305556	0.4	ATF3	ENSG00000162772	KHV	0.30303	0.284731	0.328283
Mongola	chr1:212649295-212811057	212741763	rs11119974	0.4	0.305556	0.4	ATF3	ENSG00000162772	Karitiana	0.416667	0.328767	0.541667
Mongola	chr1:212649295-212811057	212741763	rs11119974	0.4	0.305556	0.4	ATF3	ENSG00000162772	MXL	0.28125	0.245811	0.28125
Mongola	chr1:212649295-212811057	212741763	rs11119974	0.4	0.305556	0.4	ATF3	ENSG00000162772	Maya	0.547619	0.540241	0.666667
Mongola	chr1:212649295-212811057	212741763	rs11119974	0.4	0.305556	0.4	ATF3	ENSG00000162772	Miao	0.4	0.407627	0.45
Mongola	chr1:212649295-212811057	212741763	rs11119974	0.4	0.305556	0.4	ATF3	ENSG00000162772	Naxi	0.5	0.45873	0.5
Mongola	chr1:212649295-212811057	212741763	rs11119974	0.4	0.305556	0.4	ATF3	ENSG00000162772	PEL	0.417647	0.421541	0.511765
Mongola	chr1:212649295-212811057	212741763	rs11119974	0.4	0.305556	0.4	ATF3	ENSG00000162772	Pima	0.464286	0.349207	0.571429
Mongola	chr1:212649295-212811057	212741763	rs11119974	0.4	0.305556	0.4	ATF3	ENSG00000162772	Surui	0.75	0.75	0.75
Mongola	chr1:212649295-212811057	212741763	rs11119974	0.4	0.305556	0.4	ATF3	ENSG00000162772	Tu	0.3125	0.200868	0.375
Mongola	chr1:212649295-212811057	212741763	rs11119974	0.4	0.305556	0.4	ATF3	ENSG00000162772	Uygur	0.25	0.239943	0.25
Mongola	chr1:212649295-212811057	212741763	rs11119974	0.4	0.305556	0.4	ATF3	ENSG00000162772	Xibo	0.277778	0.0918274	0.333333
Mongola	chr1:212649295-212811057	212741763	rs11119974	0.4	0.305556	0.4	ATF3	ENSG00000162772	Yakut	0.26	0.272857	0.3
Mongola	chr1:212649295-212811057	212742400	rs10863980	0.4	0.305556	0.4	ATF3	ENSG00000162772	CHB	0.427184	0.111005	0.446602
Mongola	chr1:212649295-212811057	212742400	rs10863980	0.4	0.305556	0.4	ATF3	ENSG00000162772	CHS	0.404762	0.36853	0.428571
Mongola	chr1:212649295-212811057	212742400	rs10863980	0.4	0.305556	0.4	ATF3	ENSG00000162772	Cambodian	0.3	0.276562	0.35
Mongola	chr1:212649295-212811057	212742400	rs10863980	0.4	0.305556	0.4	ATF3	ENSG00000162772	Colombian	0.5	0.526157	0.642857
Mongola	chr1:212649295-212811057	212742400	rs10863980	0.4	0.305556	0.4	ATF3	ENSG00000162772	Dai	0.277778	0.186806	0.277778
Mongola	chr1:212649295-212811057	212742400	rs10863980	0.4	0.305556	0.4	ATF3	ENSG00000162772	Daur	0.444444	0.317938	0.444444
Mongola	chr1:212649295-212811057	212742400	rs10863980	0.4	0.305556	0.4	ATF3	ENSG00000162772	Hezhen	0.388889	0.258454	0.388889
Mongola	chr1:212649295-212811057	212742400	rs10863980	0.4	0.305556	0.4	ATF3	ENSG00000162772	JPT	0.27451	0.225703	0.284314
Mongola	chr1:212649295-212811057	212742400	rs10863980	0.4	0.305556	0.4	ATF3	ENSG00000162772	Japanese	0.339286	0.233705	0.357143
Mongola	chr1:212649295-212811057	212742400	rs10863980	0.4	0.305556	0.4	ATF3	ENSG00000162772	KHV	0.30303	0.284731	0.328283
Mongola	chr1:212649295-212811057	212742400	rs10863980	0.4	0.305556	0.4	ATF3	ENSG00000162772	Karitiana	0.416667	0.328767	0.541667
Mongola	chr1:212649295-212811057	212742400	rs10863980	0.4	0.305556	0.4	ATF3	ENSG00000162772	MXL	0.28125	0.245811	0.28125
Mongola	chr1:212649295-212811057	212742400	rs10863980	0.4	0.305556	0.4	ATF3	ENSG00000162772	Maya	0.547619	0.540241	0.666667
Mongola	chr1:212649295-212811057	212742400	rs10863980	0.4	0.305556	0.4	ATF3	ENSG00000162772	Miao	0.4	0.407627	0.45
Mongola	chr1:212649295-212811057	212742400	rs10863980	0.4	0.305556	0.4	ATF3	ENSG00000162772	Naxi	0.5	0.45873	0.5
Mongola	chr1:212649295-212811057	212742400	rs10863980	0.4	0.305556	0.4	ATF3	ENSG00000162772	PEL	0.417647	0.421541	0.511765
Mongola	chr1:212649295-212811057	212742400	rs10863980	0.4	0.305556	0.4	ATF3	ENSG00000162772	Pima	0.464286	0.349207	0.571429
Mongola	chr1:212649295-212811057	212742400	rs10863980	0.4	0.305556	0.4	ATF3	ENSG00000162772	Surui	0.75	0.75	0.75
Mongola	chr1:212649295-212811057	212742400	rs10863980	0.4	0.305556	0.4	ATF3	ENSG00000162772	Tu	0.3125	0.200868	0.375
Mongola	chr1:212649295-212811057	212742400	rs10863980	0.4	0.305556	0.4	ATF3	ENSG00000162772	Uygur	0.25	0.239943	0.25
Mongola	chr1:212649295-212811057	212742400	rs10863980	0.4	0.305556	0.4	ATF3	ENSG00000162772	Xibo	0.277778	0.0918274	0.333333
Mongola	chr1:212649295-212811057	212742400	rs10863980	0.4	0.305556	0.4	ATF3	ENSG00000162772	Yakut	0.26	0.272857	0.3
Mongola	chr1:212649295-212811057	212742675	rs4951613	0.4	0.305556	0.4	ATF3	ENSG00000162772	CHB	0.427184	0.111005	0.446602
Mongola	chr1:212649295-212811057	212742675	rs4951613	0.4	0.305556	0.4	ATF3	ENSG00000162772	CHS	0.404762	0.36853	0.428571
Mongola	chr1:212649295-212811057	212742675	rs4951613	0.4	0.305556	0.4	ATF3	ENSG00000162772	Cambodian	0.3	0.276562	0.35
Mongola	chr1:212649295-212811057	212742675	rs4951613	0.4	0.305556	0.4	ATF3	ENSG00000162772	Colombian	0.5	0.526157	0.642857
Mongola	chr1:212649295-212811057	212742675	rs4951613	0.4	0.305556	0.4	ATF3	ENSG00000162772	Dai	0.277778	0.186806	0.277778
Mongola	chr1:212649295-212811057	212742675	rs4951613	0.4	0.305556	0.4	ATF3	ENSG00000162772	Daur	0.444444	0.317938	0.444444
Mongola	chr1:212649295-212811057	212742675	rs4951613	0.4	0.305556	0.4	ATF3	ENSG00000162772	Hezhen	0.388889	0.258454	0.388889
Mongola	chr1:212649295-212811057	212742675	rs4951613	0.4	0.305556	0.4	ATF3	ENSG00000162772	JPT	0.27451	0.225703	0.284314
Mongola	chr1:212649295-212811057	212742675	rs4951613	0.4	0.305556	0.4	ATF3	ENSG00000162772	Japanese	0.339286	0.233705	0.357143
Mongola	chr1:212649295-212811057	212742675	rs4951613	0.4	0.305556	0.4	ATF3	ENSG00000162772	KHV	0.30303	0.284731	0.328283
Mongola	chr1:212649295-212811057	212742675	rs4951613	0.4	0.305556	0.4	ATF3	ENSG00000162772	Karitiana	0.416667	0.328767	0.541667
Mongola	chr1:212649295-212811057	212742675	rs4951613	0.4	0.305556	0.4	ATF3	ENSG00000162772	MXL	0.28125	0.245811	0.28125
Mongola	chr1:212649295-212811057	212742675	rs4951613	0.4	0.305556	0.4	ATF3	ENSG00000162772	Maya	0.547619	0.540241	0.666667
Mongola	chr1:212649295-212811057	212742675	rs4951613	0.4	0.305556	0.4	ATF3	ENSG00000162772	Miao	0.4	0.407627	0.45
Mongola	chr1:212649295-212811057	212742675	rs4951613	0.4	0.305556	0.4	ATF3	ENSG00000162772	Naxi	0.5	0.45873	0.5
Mongola	chr1:212649295-212811057	212742675	rs4951613	0.4	0.305556	0.4	ATF3	ENSG00000162772	PEL	0.417647	0.421541	0.511765
Mongola	chr1:212649295-212811057	212742675	rs4951613	0.4	0.305556	0.4	ATF3	ENSG00000162772	Pima	0.464286	0.349207	0.571429
Mongola	chr1:212649295-212811057	212742675	rs4951613	0.4	0.305556	0.4	ATF3	ENSG00000162772	Surui	0.75	0.75	0.75
Mongola	chr1:212649295-212811057	212742675	rs4951613	0.4	0.305556	0.4	ATF3	ENSG00000162772	Tu	0.3125	0.200868	0.375
Mongola	chr1:212649295-212811057	212742675	rs4951613	0.4	0.305556	0.4	ATF3	ENSG00000162772	Uygur	0.25	0.239943	0.25
Mongola	chr1:212649295-212811057	212742675	rs4951613	0.4	0.305556	0.4	ATF3	ENSG00000162772	Xibo	0.277778	0.0918274	0.333333
Mongola	chr1:212649295-212811057	212742675	rs4951613	0.4	0.305556	0.4	ATF3	ENSG00000162772	Yakut	0.26	0.272857	0.3
Mongola	chr1:212649295-212811057	212744370	rs12038766	0.4	0.305556	0.4	ATF3	ENSG00000162772	CHB	0.427184	0.111005	0.446602
Mongola	chr1:212649295-212811057	212744370	rs12038766	0.4	0.305556	0.4	ATF3	ENSG00000162772	CHS	0.404762	0.36853	0.428571
Mongola	chr1:212649295-212811057	212744370	rs12038766	0.4	0.305556	0.4	ATF3	ENSG00000162772	Colombian	0.5	0.526157	0.642857
Mongola	chr1:212649295-212811057	212744370	rs12038766	0.4	0.305556	0.4	ATF3	ENSG00000162772	Dai	0.277778	0.186806	0.277778
Mongola	chr1:212649295-212811057	212744370	rs12038766	0.4	0.305556	0.4	ATF3	ENSG00000162772	Daur	0.444444	0.317938	0.444444
Mongola	chr1:212649295-212811057	212744370	rs12038766	0.4	0.305556	0.4	ATF3	ENSG00000162772	Hezhen	0.388889	0.258454	0.388889
Mongola	chr1:212649295-212811057	212744370	rs12038766	0.4	0.305556	0.4	ATF3	ENSG00000162772	JPT	0.27451	0.225703	0.284314
Mongola	chr1:212649295-212811057	212744370	rs12038766	0.4	0.305556	0.4	ATF3	ENSG00000162772	Japanese	0.339286	0.233705	0.357143
Mongola	chr1:212649295-212811057	212744370	rs12038766	0.4	0.305556	0.4	ATF3	ENSG00000162772	KHV	0.30303	0.284731	0.328283
Mongola	chr1:212649295-212811057	212744370	rs12038766	0.4	0.305556	0.4	ATF3	ENSG00000162772	Karitiana	0.416667	0.328767	0.541667
Mongola	chr1:212649295-212811057	212744370	rs12038766	0.4	0.305556	0.4	ATF3	ENSG00000162772	MXL	0.28125	0.245811	0.28125
Mongola	chr1:212649295-212811057	212744370	rs12038766	0.4	0.305556	0.4	ATF3	ENSG00000162772	Miao	0.4	0.407627	0.45
Mongola	chr1:212649295-212811057	212744370	rs12038766	0.4	0.305556	0.4	ATF3	ENSG00000162772	Naxi	0.5	0.45873	0.5
Mongola	chr1:212649295-212811057	212744370	rs12038766	0.4	0.305556	0.4	ATF3	ENSG00000162772	PEL	0.417647	0.421541	0.511765
Mongola	chr1:212649295-212811057	212744370	rs12038766	0.4	0.305556	0.4	ATF3	ENSG00000162772	Pima	0.464286	0.349207	0.571429
Mongola	chr1:212649295-212811057	212744370	rs12038766	0.4	0.305556	0.4	ATF3	ENSG00000162772	Surui	0.75	0.75	0.75
Mongola	chr1:212649295-212811057	212744370	rs12038766	0.4	0.305556	0.4	ATF3	ENSG00000162772	Tu	0.3125	0.200868	0.375
Mongola	chr1:212649295-212811057	212744370	rs12038766	0.4	0.305556	0.4	ATF3	ENSG00000162772	Uygur	0.25	0.239943	0.25
Mongola	chr1:212649295-212811057	212744370	rs12038766	0.4	0.305556	0.4	ATF3	ENSG00000162772	Xibo	0.277778	0.0918274	0.333333
Mongola	chr1:212649295-212811057	212744370	rs12038766	0.4	0.305556	0.4	ATF3	ENSG00000162772	Yakut	0.26	0.272857	0.3
Mongola	chr1:212649295-212811057	212747722	rs11119975	0.4	0.305556	0.4	ATF3	ENSG00000162772	CHB	0.427184	0.111005	0.446602
Mongola	chr1:212649295-212811057	212747722	rs11119975	0.4	0.305556	0.4	ATF3	ENSG00000162772	CHS	0.404762	0.36853	0.428571
Mongola	chr1:212649295-212811057	212747722	rs11119975	0.4	0.305556	0.4	ATF3	ENSG00000162772	Colombian	0.5	0.526157	0.642857
Mongola	chr1:212649295-212811057	212747722	rs11119975	0.4	0.305556	0.4	ATF3	ENSG00000162772	Dai	0.277778	0.186806	0.277778
Mongola	chr1:212649295-212811057	212747722	rs11119975	0.4	0.305556	0.4	ATF3	ENSG00000162772	Daur	0.444444	0.317938	0.444444
Mongola	chr1:212649295-212811057	212747722	rs11119975	0.4	0.305556	0.4	ATF3	ENSG00000162772	Hezhen	0.388889	0.258454	0.388889
Mongola	chr1:212649295-212811057	212747722	rs11119975	0.4	0.305556	0.4	ATF3	ENSG00000162772	JPT	0.27451	0.225703	0.284314
Mongola	chr1:212649295-212811057	212747722	rs11119975	0.4	0.305556	0.4	ATF3	ENSG00000162772	Japanese	0.321429	0.233705	0.357143
Mongola	chr1:212649295-212811057	212747722	rs11119975	0.4	0.305556	0.4	ATF3	ENSG00000162772	KHV	0.30303	0.284731	0.328283
Mongola	chr1:212649295-212811057	212747722	rs11119975	0.4	0.305556	0.4	ATF3	ENSG00000162772	Karitiana	0.416667	0.328767	0.541667
Mongola	chr1:212649295-212811057	212747722	rs11119975	0.4	0.305556	0.4	ATF3	ENSG00000162772	MXL	0.273438	0.245811	0.28125
Mongola	chr1:212649295-212811057	212747722	rs11119975	0.4	0.305556	0.4	ATF3	ENSG00000162772	Maya	0.547619	0.540241	0.666667
Mongola	chr1:212649295-212811057	212747722	rs11119975	0.4	0.305556	0.4	ATF3	ENSG00000162772	Miao	0.4	0.407627	0.45
Mongola	chr1:212649295-212811057	212747722	rs11119975	0.4	0.305556	0.4	ATF3	ENSG00000162772	Naxi	0.5	0.45873	0.5
Mongola	chr1:212649295-212811057	212747722	rs11119975	0.4	0.305556	0.4	ATF3	ENSG00000162772	PEL	0.411765	0.421541	0.511765
Mongola	chr1:212649295-212811057	212747722	rs11119975	0.4	0.305556	0.4	ATF3	ENSG00000162772	Pima	0.464286	0.349207	0.571429
Mongola	chr1:212649295-212811057	212747722	rs11119975	0.4	0.305556	0.4	ATF3	ENSG00000162772	Surui	0.75	0.75	0.75
Mongola	chr1:212649295-212811057	212747722	rs11119975	0.4	0.305556	0.4	ATF3	ENSG00000162772	Tu	0.3125	0.200868	0.375
Mongola	chr1:212649295-212811057	212747722	rs11119975	0.4	0.305556	0.4	ATF3	ENSG00000162772	Xibo	0.277778	0.0918274	0.333333
Mongola	chr1:212649295-212811057	212747722	rs11119975	0.4	0.305556	0.4	ATF3	ENSG00000162772	Yakut	0.26	0.272857	0.3
Mongola	chr1:212649295-212811057	212751634	rs11119977	0.4	0.305556	0.4	ATF3	ENSG00000162772	CHB	0.364078	0.111005	0.446602
Mongola	chr1:212649295-212811057	212751634	rs11119977	0.4	0.305556	0.4	ATF3	ENSG00000162772	CHS	0.371429	0.36853	0.428571
Mongola	chr1:212649295-212811057	212751634	rs11119977	0.4	0.305556	0.4	ATF3	ENSG00000162772	Cambodian	0.3	0.276562	0.35
Mongola	chr1:212649295-212811057	212751634	rs11119977	0.4	0.305556	0.4	ATF3	ENSG00000162772	Colombian	0.5	0.526157	0.642857
Mongola	chr1:212649295-212811057	212751634	rs11119977	0.4	0.305556	0.4	ATF3	ENSG00000162772	Dai	0.277778	0.186806	0.277778
Mongola	chr1:212649295-212811057	212751634	rs11119977	0.4	0.305556	0.4	ATF3	ENSG00000162772	Daur	0.444444	0.317938	0.444444
Mongola	chr1:212649295-212811057	212751634	rs11119977	0.4	0.305556	0.4	ATF3	ENSG00000162772	Hezhen	0.277778	0.258454	0.388889
Mongola	chr1:212649295-212811057	212751634	rs11119977	0.4	0.305556	0.4	ATF3	ENSG00000162772	JPT	0.245098	0.225703	0.284314
Mongola	chr1:212649295-212811057	212751634	rs11119977	0.4	0.305556	0.4	ATF3	ENSG00000162772	Japanese	0.25	0.233705	0.357143
Mongola	chr1:212649295-212811057	212751634	rs11119977	0.4	0.305556	0.4	ATF3	ENSG00000162772	KHV	0.287879	0.284731	0.328283
Mongola	chr1:212649295-212811057	212751634	rs11119977	0.4	0.305556	0.4	ATF3	ENSG00000162772	Karitiana	0.416667	0.328767	0.541667
Mongola	chr1:212649295-212811057	212751634	rs11119977	0.4	0.305556	0.4	ATF3	ENSG00000162772	MXL	0.273438	0.245811	0.28125
Mongola	chr1:212649295-212811057	212751634	rs11119977	0.4	0.305556	0.4	ATF3	ENSG00000162772	Maya	0.547619	0.540241	0.666667
Mongola	chr1:212649295-212811057	212751634	rs11119977	0.4	0.305556	0.4	ATF3	ENSG00000162772	Miao	0.35	0.407627	0.45
Mongola	chr1:212649295-212811057	212751634	rs11119977	0.4	0.305556	0.4	ATF3	ENSG00000162772	Naxi	0.5	0.45873	0.5
Mongola	chr1:212649295-212811057	212751634	rs11119977	0.4	0.305556	0.4	ATF3	ENSG00000162772	PEL	0.411765	0.421541	0.511765
Mongola	chr1:212649295-212811057	212751634	rs11119977	0.4	0.305556	0.4	ATF3	ENSG00000162772	Pima	0.464286	0.349207	0.571429
Mongola	chr1:212649295-212811057	212751634	rs11119977	0.4	0.305556	0.4	ATF3	ENSG00000162772	Surui	0.75	0.75	0.75
Mongola	chr1:212649295-212811057	212751634	rs11119977	0.4	0.305556	0.4	ATF3	ENSG00000162772	Tu	0.3125	0.200868	0.375
Mongola	chr1:212649295-212811057	212751634	rs11119977	0.4	0.305556	0.4	ATF3	ENSG00000162772	Xibo	0.277778	0.0918274	0.333333
Mongola	chr1:212649295-212811057	212751634	rs11119977	0.4	0.305556	0.4	ATF3	ENSG00000162772	Yakut	0.26	0.272857	0.3
Mongola	chr1:212649295-212811057	212756363	rs10863981	0.4	0.305556	0.4	ATF3	ENSG00000162772	CHB	0.359223	0.111005	0.446602
Mongola	chr1:212649295-212811057	212756363	rs10863981	0.4	0.305556	0.4	ATF3	ENSG00000162772	CHS	0.371429	0.36853	0.428571
Mongola	chr1:212649295-212811057	212756363	rs10863981	0.4	0.305556	0.4	ATF3	ENSG00000162772	Cambodian	0.3	0.276562	0.35
Mongola	chr1:212649295-212811057	212756363	rs10863981	0.4	0.305556	0.4	ATF3	ENSG00000162772	Colombian	0.5	0.526157	0.642857
Mongola	chr1:212649295-212811057	212756363	rs10863981	0.4	0.305556	0.4	ATF3	ENSG00000162772	Dai	0.277778	0.186806	0.277778
Mongola	chr1:212649295-212811057	212756363	rs10863981	0.4	0.305556	0.4	ATF3	ENSG00000162772	Daur	0.444444	0.317938	0.444444
Mongola	chr1:212649295-212811057	212756363	rs10863981	0.4	0.305556	0.4	ATF3	ENSG00000162772	Hezhen	0.277778	0.258454	0.388889
Mongola	chr1:212649295-212811057	212756363	rs10863981	0.4	0.305556	0.4	ATF3	ENSG00000162772	JPT	0.245098	0.225703	0.284314
Mongola	chr1:212649295-212811057	212756363	rs10863981	0.4	0.305556	0.4	ATF3	ENSG00000162772	Japanese	0.25	0.233705	0.357143
Mongola	chr1:212649295-212811057	212756363	rs10863981	0.4	0.305556	0.4	ATF3	ENSG00000162772	KHV	0.287879	0.284731	0.328283
Mongola	chr1:212649295-212811057	212756363	rs10863981	0.4	0.305556	0.4	ATF3	ENSG00000162772	Karitiana	0.416667	0.328767	0.541667
Mongola	chr1:212649295-212811057	212756363	rs10863981	0.4	0.305556	0.4	ATF3	ENSG00000162772	MXL	0.273438	0.245811	0.28125
Mongola	chr1:212649295-212811057	212756363	rs10863981	0.4	0.305556	0.4	ATF3	ENSG00000162772	Maya	0.547619	0.540241	0.666667
Mongola	chr1:212649295-212811057	212756363	rs10863981	0.4	0.305556	0.4	ATF3	ENSG00000162772	Miao	0.35	0.407627	0.45
Mongola	chr1:212649295-212811057	212756363	rs10863981	0.4	0.305556	0.4	ATF3	ENSG00000162772	Naxi	0.5	0.45873	0.5
Mongola	chr1:212649295-212811057	212756363	rs10863981	0.4	0.305556	0.4	ATF3	ENSG00000162772	PEL	0.411765	0.421541	0.511765
Mongola	chr1:212649295-212811057	212756363	rs10863981	0.4	0.305556	0.4	ATF3	ENSG00000162772	Pima	0.464286	0.349207	0.571429
Mongola	chr1:212649295-212811057	212756363	rs10863981	0.4	0.305556	0.4	ATF3	ENSG00000162772	Surui	0.75	0.75	0.75
Mongola	chr1:212649295-212811057	212756363	rs10863981	0.4	0.305556	0.4	ATF3	ENSG00000162772	Tu	0.3125	0.200868	0.375
Mongola	chr1:212649295-212811057	212756363	rs10863981	0.4	0.305556	0.4	ATF3	ENSG00000162772	Xibo	0.277778	0.0918274	0.333333
Mongola	chr1:212649295-212811057	212756363	rs10863981	0.4	0.305556	0.4	ATF3	ENSG00000162772	Yakut	0.26	0.272857	0.3
PEL	chr1:212649295-212811057	212738835	rs3806460	0.417647	0.421541	0.511765	ENSG00000288007	ENSG00000288007	CHB	0.427184	0.111005	0.446602
PEL	chr1:212649295-212811057	212738835	rs3806460	0.417647	0.421541	0.511765	ENSG00000288007	ENSG00000288007	CHS	0.404762	0.36853	0.428571
PEL	chr1:212649295-212811057	212738835	rs3806460	0.417647	0.421541	0.511765	ENSG00000288007	ENSG00000288007	Cambodian	0.3	0.276562	0.35
PEL	chr1:212649295-212811057	212738835	rs3806460	0.417647	0.421541	0.511765	ENSG00000288007	ENSG00000288007	Colombian	0.5	0.526157	0.642857
PEL	chr1:212649295-212811057	212738835	rs3806460	0.417647	0.421541	0.511765	ENSG00000288007	ENSG00000288007	Dai	0.277778	0.186806	0.277778
PEL	chr1:212649295-212811057	212738835	rs3806460	0.417647	0.421541	0.511765	ENSG00000288007	ENSG00000288007	Daur	0.444444	0.317938	0.444444
PEL	chr1:212649295-212811057	212738835	rs3806460	0.417647	0.421541	0.511765	ENSG00000288007	ENSG00000288007	Hezhen	0.388889	0.258454	0.388889
PEL	chr1:212649295-212811057	212738835	rs3806460	0.417647	0.421541	0.511765	ENSG00000288007	ENSG00000288007	JPT	0.27451	0.225703	0.284314
PEL	chr1:212649295-212811057	212738835	rs3806460	0.417647	0.421541	0.511765	ENSG00000288007	ENSG00000288007	Japanese	0.339286	0.233705	0.357143
PEL	chr1:212649295-212811057	212738835	rs3806460	0.417647	0.421541	0.511765	ENSG00000288007	ENSG00000288007	KHV	0.30303	0.284731	0.328283
PEL	chr1:212649295-212811057	212738835	rs3806460	0.417647	0.421541	0.511765	ENSG00000288007	ENSG00000288007	Karitiana	0.416667	0.328767	0.541667
PEL	chr1:212649295-212811057	212738835	rs3806460	0.417647	0.421541	0.511765	ENSG00000288007	ENSG00000288007	MXL	0.28125	0.245811	0.28125
PEL	chr1:212649295-212811057	212738835	rs3806460	0.417647	0.421541	0.511765	ENSG00000288007	ENSG00000288007	Maya	0.547619	0.540241	0.666667
PEL	chr1:212649295-212811057	212738835	rs3806460	0.417647	0.421541	0.511765	ENSG00000288007	ENSG00000288007	Miao	0.4	0.407627	0.45
PEL	chr1:212649295-212811057	212738835	rs3806460	0.417647	0.421541	0.511765	ENSG00000288007	ENSG00000288007	Mongola	0.4	0.305556	0.4
PEL	chr1:212649295-212811057	212738835	rs3806460	0.417647	0.421541	0.511765	ENSG00000288007	ENSG00000288007	Naxi	0.5	0.45873	0.5
PEL	chr1:212649295-212811057	212738835	rs3806460	0.417647	0.421541	0.511765	ENSG00000288007	ENSG00000288007	Pima	0.464286	0.349207	0.571429
PEL	chr1:212649295-212811057	212738835	rs3806460	0.417647	0.421541	0.511765	ENSG00000288007	ENSG00000288007	Surui	0.75	0.75	0.75
PEL	chr1:212649295-212811057	212738835	rs3806460	0.417647	0.421541	0.511765	ENSG00000288007	ENSG00000288007	Tu	0.3125	0.200868	0.375
PEL	chr1:212649295-212811057	212738835	rs3806460	0.417647	0.421541	0.511765	ENSG00000288007	ENSG00000288007	Uygur	0.25	0.239943	0.25
PEL	chr1:212649295-212811057	212738835	rs3806460	0.417647	0.421541	0.511765	ENSG00000288007	ENSG00000288007	Xibo	0.277778	0.0918274	0.333333
PEL	chr1:212649295-212811057	212738835	rs3806460	0.417647	0.421541	0.511765	ENSG00000288007	ENSG00000288007	Yakut	0.26	0.272857	0.3
PEL	chr1:212649295-212811057	212741763	rs11119974	0.417647	0.421541	0.511765	ATF3	ENSG00000162772	CHB	0.427184	0.111005	0.446602
PEL	chr1:212649295-212811057	212741763	rs11119974	0.417647	0.421541	0.511765	ATF3	ENSG00000162772	CHS	0.404762	0.36853	0.428571
PEL	chr1:212649295-212811057	212741763	rs11119974	0.417647	0.421541	0.511765	ATF3	ENSG00000162772	Cambodian	0.3	0.276562	0.35
PEL	chr1:212649295-212811057	212741763	rs11119974	0.417647	0.421541	0.511765	ATF3	ENSG00000162772	Colombian	0.5	0.526157	0.642857
PEL	chr1:212649295-212811057	212741763	rs11119974	0.417647	0.421541	0.511765	ATF3	ENSG00000162772	Dai	0.277778	0.186806	0.277778
PEL	chr1:212649295-212811057	212741763	rs11119974	0.417647	0.421541	0.511765	ATF3	ENSG00000162772	Daur	0.444444	0.317938	0.444444
PEL	chr1:212649295-212811057	212741763	rs11119974	0.417647	0.421541	0.511765	ATF3	ENSG00000162772	Hezhen	0.388889	0.258454	0.388889
PEL	chr1:212649295-212811057	212741763	rs11119974	0.417647	0.421541	0.511765	ATF3	ENSG00000162772	JPT	0.27451	0.225703	0.284314
PEL	chr1:212649295-212811057	212741763	rs11119974	0.417647	0.421541	0.511765	ATF3	ENSG00000162772	Japanese	0.339286	0.233705	0.357143
PEL	chr1:212649295-212811057	212741763	rs11119974	0.417647	0.421541	0.511765	ATF3	ENSG00000162772	KHV	0.30303	0.284731	0.328283
PEL	chr1:212649295-212811057	212741763	rs11119974	0.417647	0.421541	0.511765	ATF3	ENSG00000162772	Karitiana	0.416667	0.328767	0.541667
PEL	chr1:212649295-212811057	212741763	rs11119974	0.417647	0.421541	0.511765	ATF3	ENSG00000162772	MXL	0.28125	0.245811	0.28125
PEL	chr1:212649295-212811057	212741763	rs11119974	0.417647	0.421541	0.511765	ATF3	ENSG00000162772	Maya	0.547619	0.540241	0.666667
PEL	chr1:212649295-212811057	212741763	rs11119974	0.417647	0.421541	0.511765	ATF3	ENSG00000162772	Miao	0.4	0.407627	0.45
PEL	chr1:212649295-212811057	212741763	rs11119974	0.417647	0.421541	0.511765	ATF3	ENSG00000162772	Mongola	0.4	0.305556	0.4
PEL	chr1:212649295-212811057	212741763	rs11119974	0.417647	0.421541	0.511765	ATF3	ENSG00000162772	Naxi	0.5	0.45873	0.5
PEL	chr1:212649295-212811057	212741763	rs11119974	0.417647	0.421541	0.511765	ATF3	ENSG00000162772	Pima	0.464286	0.349207	0.571429
PEL	chr1:212649295-212811057	212741763	rs11119974	0.417647	0.421541	0.511765	ATF3	ENSG00000162772	Surui	0.75	0.75	0.75
PEL	chr1:212649295-212811057	212741763	rs11119974	0.417647	0.421541	0.511765	ATF3	ENSG00000162772	Tu	0.3125	0.200868	0.375
PEL	chr1:212649295-212811057	212741763	rs11119974	0.417647	0.421541	0.511765	ATF3	ENSG00000162772	Uygur	0.25	0.239943	0.25
PEL	chr1:212649295-212811057	212741763	rs11119974	0.417647	0.421541	0.511765	ATF3	ENSG00000162772	Xibo	0.277778	0.0918274	0.333333
PEL	chr1:212649295-212811057	212741763	rs11119974	0.417647	0.421541	0.511765	ATF3	ENSG00000162772	Yakut	0.26	0.272857	0.3
PEL	chr1:212649295-212811057	212742400	rs10863980	0.417647	0.421541	0.511765	ATF3	ENSG00000162772	CHB	0.427184	0.111005	0.446602
PEL	chr1:212649295-212811057	212742400	rs10863980	0.417647	0.421541	0.511765	ATF3	ENSG00000162772	CHS	0.404762	0.36853	0.428571
PEL	chr1:212649295-212811057	212742400	rs10863980	0.417647	0.421541	0.511765	ATF3	ENSG00000162772	Cambodian	0.3	0.276562	0.35
PEL	chr1:212649295-212811057	212742400	rs10863980	0.417647	0.421541	0.511765	ATF3	ENSG00000162772	Colombian	0.5	0.526157	0.642857
PEL	chr1:212649295-212811057	212742400	rs10863980	0.417647	0.421541	0.511765	ATF3	ENSG00000162772	Dai	0.277778	0.186806	0.277778
PEL	chr1:212649295-212811057	212742400	rs10863980	0.417647	0.421541	0.511765	ATF3	ENSG00000162772	Daur	0.444444	0.317938	0.444444
PEL	chr1:212649295-212811057	212742400	rs10863980	0.417647	0.421541	0.511765	ATF3	ENSG00000162772	Hezhen	0.388889	0.258454	0.388889
PEL	chr1:212649295-212811057	212742400	rs10863980	0.417647	0.421541	0.511765	ATF3	ENSG00000162772	JPT	0.27451	0.225703	0.284314
PEL	chr1:212649295-212811057	212742400	rs10863980	0.417647	0.421541	0.511765	ATF3	ENSG00000162772	Japanese	0.339286	0.233705	0.357143
PEL	chr1:212649295-212811057	212742400	rs10863980	0.417647	0.421541	0.511765	ATF3	ENSG00000162772	KHV	0.30303	0.284731	0.328283
PEL	chr1:212649295-212811057	212742400	rs10863980	0.417647	0.421541	0.511765	ATF3	ENSG00000162772	Karitiana	0.416667	0.328767	0.541667
PEL	chr1:212649295-212811057	212742400	rs10863980	0.417647	0.421541	0.511765	ATF3	ENSG00000162772	MXL	0.28125	0.245811	0.28125
PEL	chr1:212649295-212811057	212742400	rs10863980	0.417647	0.421541	0.511765	ATF3	ENSG00000162772	Maya	0.547619	0.540241	0.666667
PEL	chr1:212649295-212811057	212742400	rs10863980	0.417647	0.421541	0.511765	ATF3	ENSG00000162772	Miao	0.4	0.407627	0.45
PEL	chr1:212649295-212811057	212742400	rs10863980	0.417647	0.421541	0.511765	ATF3	ENSG00000162772	Mongola	0.4	0.305556	0.4
PEL	chr1:212649295-212811057	212742400	rs10863980	0.417647	0.421541	0.511765	ATF3	ENSG00000162772	Naxi	0.5	0.45873	0.5
PEL	chr1:212649295-212811057	212742400	rs10863980	0.417647	0.421541	0.511765	ATF3	ENSG00000162772	Pima	0.464286	0.349207	0.571429
PEL	chr1:212649295-212811057	212742400	rs10863980	0.417647	0.421541	0.511765	ATF3	ENSG00000162772	Surui	0.75	0.75	0.75
PEL	chr1:212649295-212811057	212742400	rs10863980	0.417647	0.421541	0.511765	ATF3	ENSG00000162772	Tu	0.3125	0.200868	0.375
PEL	chr1:212649295-212811057	212742400	rs10863980	0.417647	0.421541	0.511765	ATF3	ENSG00000162772	Uygur	0.25	0.239943	0.25
PEL	chr1:212649295-212811057	212742400	rs10863980	0.417647	0.421541	0.511765	ATF3	ENSG00000162772	Xibo	0.277778	0.0918274	0.333333
PEL	chr1:212649295-212811057	212742400	rs10863980	0.417647	0.421541	0.511765	ATF3	ENSG00000162772	Yakut	0.26	0.272857	0.3
PEL	chr1:212649295-212811057	212742675	rs4951613	0.417647	0.421541	0.511765	ATF3	ENSG00000162772	CHB	0.427184	0.111005	0.446602
PEL	chr1:212649295-212811057	212742675	rs4951613	0.417647	0.421541	0.511765	ATF3	ENSG00000162772	CHS	0.404762	0.36853	0.428571
PEL	chr1:212649295-212811057	212742675	rs4951613	0.417647	0.421541	0.511765	ATF3	ENSG00000162772	Cambodian	0.3	0.276562	0.35
PEL	chr1:212649295-212811057	212742675	rs4951613	0.417647	0.421541	0.511765	ATF3	ENSG00000162772	Colombian	0.5	0.526157	0.642857
PEL	chr1:212649295-212811057	212742675	rs4951613	0.417647	0.421541	0.511765	ATF3	ENSG00000162772	Dai	0.277778	0.186806	0.277778
PEL	chr1:212649295-212811057	212742675	rs4951613	0.417647	0.421541	0.511765	ATF3	ENSG00000162772	Daur	0.444444	0.317938	0.444444
PEL	chr1:212649295-212811057	212742675	rs4951613	0.417647	0.421541	0.511765	ATF3	ENSG00000162772	Hezhen	0.388889	0.258454	0.388889
PEL	chr1:212649295-212811057	212742675	rs4951613	0.417647	0.421541	0.511765	ATF3	ENSG00000162772	JPT	0.27451	0.225703	0.284314
PEL	chr1:212649295-212811057	212742675	rs4951613	0.417647	0.421541	0.511765	ATF3	ENSG00000162772	Japanese	0.339286	0.233705	0.357143
PEL	chr1:212649295-212811057	212742675	rs4951613	0.417647	0.421541	0.511765	ATF3	ENSG00000162772	KHV	0.30303	0.284731	0.328283
PEL	chr1:212649295-212811057	212742675	rs4951613	0.417647	0.421541	0.511765	ATF3	ENSG00000162772	Karitiana	0.416667	0.328767	0.541667
PEL	chr1:212649295-212811057	212742675	rs4951613	0.417647	0.421541	0.511765	ATF3	ENSG00000162772	MXL	0.28125	0.245811	0.28125
PEL	chr1:212649295-212811057	212742675	rs4951613	0.417647	0.421541	0.511765	ATF3	ENSG00000162772	Maya	0.547619	0.540241	0.666667
PEL	chr1:212649295-212811057	212742675	rs4951613	0.417647	0.421541	0.511765	ATF3	ENSG00000162772	Miao	0.4	0.407627	0.45
PEL	chr1:212649295-212811057	212742675	rs4951613	0.417647	0.421541	0.511765	ATF3	ENSG00000162772	Mongola	0.4	0.305556	0.4
PEL	chr1:212649295-212811057	212742675	rs4951613	0.417647	0.421541	0.511765	ATF3	ENSG00000162772	Naxi	0.5	0.45873	0.5
PEL	chr1:212649295-212811057	212742675	rs4951613	0.417647	0.421541	0.511765	ATF3	ENSG00000162772	Pima	0.464286	0.349207	0.571429
PEL	chr1:212649295-212811057	212742675	rs4951613	0.417647	0.421541	0.511765	ATF3	ENSG00000162772	Surui	0.75	0.75	0.75
PEL	chr1:212649295-212811057	212742675	rs4951613	0.417647	0.421541	0.511765	ATF3	ENSG00000162772	Tu	0.3125	0.200868	0.375
PEL	chr1:212649295-212811057	212742675	rs4951613	0.417647	0.421541	0.511765	ATF3	ENSG00000162772	Uygur	0.25	0.239943	0.25
PEL	chr1:212649295-212811057	212742675	rs4951613	0.417647	0.421541	0.511765	ATF3	ENSG00000162772	Xibo	0.277778	0.0918274	0.333333
PEL	chr1:212649295-212811057	212742675	rs4951613	0.417647	0.421541	0.511765	ATF3	ENSG00000162772	Yakut	0.26	0.272857	0.3
PEL	chr1:212649295-212811057	212744370	rs12038766	0.417647	0.421541	0.511765	ATF3	ENSG00000162772	CHB	0.427184	0.111005	0.446602
PEL	chr1:212649295-212811057	212744370	rs12038766	0.417647	0.421541	0.511765	ATF3	ENSG00000162772	CHS	0.404762	0.36853	0.428571
PEL	chr1:212649295-212811057	212744370	rs12038766	0.417647	0.421541	0.511765	ATF3	ENSG00000162772	Colombian	0.5	0.526157	0.642857
PEL	chr1:212649295-212811057	212744370	rs12038766	0.417647	0.421541	0.511765	ATF3	ENSG00000162772	Dai	0.277778	0.186806	0.277778
PEL	chr1:212649295-212811057	212744370	rs12038766	0.417647	0.421541	0.511765	ATF3	ENSG00000162772	Daur	0.444444	0.317938	0.444444
PEL	chr1:212649295-212811057	212744370	rs12038766	0.417647	0.421541	0.511765	ATF3	ENSG00000162772	Hezhen	0.388889	0.258454	0.388889
PEL	chr1:212649295-212811057	212744370	rs12038766	0.417647	0.421541	0.511765	ATF3	ENSG00000162772	JPT	0.27451	0.225703	0.284314
PEL	chr1:212649295-212811057	212744370	rs12038766	0.417647	0.421541	0.511765	ATF3	ENSG00000162772	Japanese	0.339286	0.233705	0.357143
PEL	chr1:212649295-212811057	212744370	rs12038766	0.417647	0.421541	0.511765	ATF3	ENSG00000162772	KHV	0.30303	0.284731	0.328283
PEL	chr1:212649295-212811057	212744370	rs12038766	0.417647	0.421541	0.511765	ATF3	ENSG00000162772	Karitiana	0.416667	0.328767	0.541667
PEL	chr1:212649295-212811057	212744370	rs12038766	0.417647	0.421541	0.511765	ATF3	ENSG00000162772	MXL	0.28125	0.245811	0.28125
PEL	chr1:212649295-212811057	212744370	rs12038766	0.417647	0.421541	0.511765	ATF3	ENSG00000162772	Miao	0.4	0.407627	0.45
PEL	chr1:212649295-212811057	212744370	rs12038766	0.417647	0.421541	0.511765	ATF3	ENSG00000162772	Mongola	0.4	0.305556	0.4
PEL	chr1:212649295-212811057	212744370	rs12038766	0.417647	0.421541	0.511765	ATF3	ENSG00000162772	Naxi	0.5	0.45873	0.5
PEL	chr1:212649295-212811057	212744370	rs12038766	0.417647	0.421541	0.511765	ATF3	ENSG00000162772	Pima	0.464286	0.349207	0.571429
PEL	chr1:212649295-212811057	212744370	rs12038766	0.417647	0.421541	0.511765	ATF3	ENSG00000162772	Surui	0.75	0.75	0.75
PEL	chr1:212649295-212811057	212744370	rs12038766	0.417647	0.421541	0.511765	ATF3	ENSG00000162772	Tu	0.3125	0.200868	0.375
PEL	chr1:212649295-212811057	212744370	rs12038766	0.417647	0.421541	0.511765	ATF3	ENSG00000162772	Uygur	0.25	0.239943	0.25
PEL	chr1:212649295-212811057	212744370	rs12038766	0.417647	0.421541	0.511765	ATF3	ENSG00000162772	Xibo	0.277778	0.0918274	0.333333
PEL	chr1:212649295-212811057	212744370	rs12038766	0.417647	0.421541	0.511765	ATF3	ENSG00000162772	Yakut	0.26	0.272857	0.3
PEL	chr1:212649295-212811057	212774757	rs4951625	0.447059	0.421541	0.511765	ATF3	ENSG00000162772	Colombian	0.642857	0.526157	0.642857
PEL	chr1:212649295-212811057	212774757	rs4951625	0.447059	0.421541	0.511765	ATF3	ENSG00000162772	Karitiana	0.458333	0.328767	0.541667
PEL	chr1:212649295-212811057	212774757	rs4951625	0.447059	0.421541	0.511765	ATF3	ENSG00000162772	MXL	0.25	0.245811	0.28125
PEL	chr1:212649295-212811057	212774757	rs4951625	0.447059	0.421541	0.511765	ATF3	ENSG00000162772	Maya	0.619048	0.540241	0.666667
PEL	chr1:212649295-212811057	212774757	rs4951625	0.447059	0.421541	0.511765	ATF3	ENSG00000162772	Mongola	0.2	0.305556	0.4
PEL	chr1:212649295-212811057	212774757	rs4951625	0.447059	0.421541	0.511765	ATF3	ENSG00000162772	Naxi	0.222222	0.45873	0.5
PEL	chr1:212649295-212811057	212774757	rs4951625	0.447059	0.421541	0.511765	ATF3	ENSG00000162772	Pima	0.392857	0.349207	0.571429
PEL	chr1:212649295-212811057	212774757	rs4951625	0.447059	0.421541	0.511765	ATF3	ENSG00000162772	Surui	0.75	0.75	0.75
PEL	chr1:212649295-212811057	212774757	rs4951625	0.447059	0.421541	0.511765	ATF3	ENSG00000162772	Yakut	0.24	0.272857	0.3
PEL	chr1:212649295-212811057	212775529	rs12564392	0.447059	0.421541	0.511765	ATF3	ENSG00000162772	Colombian	0.642857	0.526157	0.642857
PEL	chr1:212649295-212811057	212775529	rs12564392	0.447059	0.421541	0.511765	ATF3	ENSG00000162772	Karitiana	0.458333	0.328767	0.541667
PEL	chr1:212649295-212811057	212775529	rs12564392	0.447059	0.421541	0.511765	ATF3	ENSG00000162772	MXL	0.25	0.245811	0.28125
PEL	chr1:212649295-212811057	212775529	rs12564392	0.447059	0.421541	0.511765	ATF3	ENSG00000162772	Maya	0.619048	0.540241	0.666667
PEL	chr1:212649295-212811057	212775529	rs12564392	0.447059	0.421541	0.511765	ATF3	ENSG00000162772	Mongola	0.2	0.305556	0.4
PEL	chr1:212649295-212811057	212775529	rs12564392	0.447059	0.421541	0.511765	ATF3	ENSG00000162772	Naxi	0.222222	0.45873	0.5
PEL	chr1:212649295-212811057	212775529	rs12564392	0.447059	0.421541	0.511765	ATF3	ENSG00000162772	Pima	0.392857	0.349207	0.571429
PEL	chr1:212649295-212811057	212775529	rs12564392	0.447059	0.421541	0.511765	ATF3	ENSG00000162772	Surui	0.75	0.75	0.75
PEL	chr1:212649295-212811057	212775529	rs12564392	0.447059	0.421541	0.511765	ATF3	ENSG00000162772	Yakut	0.24	0.272857	0.3
PEL	chr1:212649295-212811057	212788567	rs2229346	0.447059	0.421541	0.511765	ATF3	ENSG00000162772	Colombian	0.642857	0.526157	0.642857
PEL	chr1:212649295-212811057	212788567	rs2229346	0.447059	0.421541	0.511765	ATF3	ENSG00000162772	Karitiana	0.458333	0.328767	0.541667
PEL	chr1:212649295-212811057	212788567	rs2229346	0.447059	0.421541	0.511765	ATF3	ENSG00000162772	MXL	0.25	0.245811	0.28125
PEL	chr1:212649295-212811057	212788567	rs2229346	0.447059	0.421541	0.511765	ATF3	ENSG00000162772	Maya	0.619048	0.540241	0.666667
PEL	chr1:212649295-212811057	212788567	rs2229346	0.447059	0.421541	0.511765	ATF3	ENSG00000162772	Mongola	0.2	0.305556	0.4
PEL	chr1:212649295-212811057	212788567	rs2229346	0.447059	0.421541	0.511765	ATF3	ENSG00000162772	Naxi	0.222222	0.45873	0.5
PEL	chr1:212649295-212811057	212788567	rs2229346	0.447059	0.421541	0.511765	ATF3	ENSG00000162772	Pima	0.464286	0.349207	0.571429
PEL	chr1:212649295-212811057	212788567	rs2229346	0.447059	0.421541	0.511765	ATF3	ENSG00000162772	Surui	0.75	0.75	0.75
PEL	chr1:212649295-212811057	212788567	rs2229346	0.447059	0.421541	0.511765	ATF3	ENSG00000162772	Yakut	0.24	0.272857	0.3
PEL	chr1:212649295-212811057	212785414	rs11571530	0.452941	0.421541	0.511765	ATF3	ENSG00000162772	Colombian	0.642857	0.526157	0.642857
PEL	chr1:212649295-212811057	212785414	rs11571530	0.452941	0.421541	0.511765	ATF3	ENSG00000162772	Karitiana	0.458333	0.328767	0.541667
PEL	chr1:212649295-212811057	212785414	rs11571530	0.452941	0.421541	0.511765	ATF3	ENSG00000162772	MXL	0.25	0.245811	0.28125
PEL	chr1:212649295-212811057	212785414	rs11571530	0.452941	0.421541	0.511765	ATF3	ENSG00000162772	Maya	0.619048	0.540241	0.666667
PEL	chr1:212649295-212811057	212785414	rs11571530	0.452941	0.421541	0.511765	ATF3	ENSG00000162772	Mongola	0.2	0.305556	0.4
PEL	chr1:212649295-212811057	212785414	rs11571530	0.452941	0.421541	0.511765	ATF3	ENSG00000162772	Naxi	0.222222	0.45873	0.5
PEL	chr1:212649295-212811057	212785414	rs11571530	0.452941	0.421541	0.511765	ATF3	ENSG00000162772	Pima	0.464286	0.349207	0.571429
PEL	chr1:212649295-212811057	212785414	rs11571530	0.452941	0.421541	0.511765	ATF3	ENSG00000162772	Surui	0.75	0.75	0.75
PEL	chr1:212649295-212811057	212785414	rs11571530	0.452941	0.421541	0.511765	ATF3	ENSG00000162772	Yakut	0.24	0.272857	0.3
Karitiana	chr1:212649295-212811057	212766199	rs1976657	0.458333	0.328767	0.541667	ATF3	ENSG00000162772	CHB	0.218447	0.111005	0.446602
Karitiana	chr1:212649295-212811057	212766199	rs1976657	0.458333	0.328767	0.541667	ATF3	ENSG00000162772	CHS	0.204762	0.36853	0.428571
Karitiana	chr1:212649295-212811057	212766199	rs1976657	0.458333	0.328767	0.541667	ATF3	ENSG00000162772	CLM	0.201087	0.186358	0.233696
Karitiana	chr1:212649295-212811057	212766199	rs1976657	0.458333	0.328767	0.541667	ATF3	ENSG00000162772	Colombian	0.642857	0.526157	0.642857
Karitiana	chr1:212649295-212811057	212766199	rs1976657	0.458333	0.328767	0.541667	ATF3	ENSG00000162772	Daur	0.222222	0.317938	0.444444
Karitiana	chr1:212649295-212811057	212766199	rs1976657	0.458333	0.328767	0.541667	ATF3	ENSG00000162772	Japanese	0.214286	0.233705	0.357143
Karitiana	chr1:212649295-212811057	212766199	rs1976657	0.458333	0.328767	0.541667	ATF3	ENSG00000162772	MXL	0.257812	0.245811	0.28125
Karitiana	chr1:212649295-212811057	212766199	rs1976657	0.458333	0.328767	0.541667	ATF3	ENSG00000162772	Maya	0.666667	0.540241	0.666667
Karitiana	chr1:212649295-212811057	212766199	rs1976657	0.458333	0.328767	0.541667	ATF3	ENSG00000162772	Mongola	0.25	0.305556	0.4
Karitiana	chr1:212649295-212811057	212766199	rs1976657	0.458333	0.328767	0.541667	ATF3	ENSG00000162772	Naxi	0.277778	0.45873	0.5
Karitiana	chr1:212649295-212811057	212766199	rs1976657	0.458333	0.328767	0.541667	ATF3	ENSG00000162772	PEL	0.470588	0.421541	0.511765
Karitiana	chr1:212649295-212811057	212766199	rs1976657	0.458333	0.328767	0.541667	ATF3	ENSG00000162772	Pima	0.428571	0.349207	0.571429
Karitiana	chr1:212649295-212811057	212766199	rs1976657	0.458333	0.328767	0.541667	ATF3	ENSG00000162772	Surui	0.75	0.75	0.75
Karitiana	chr1:212649295-212811057	212766199	rs1976657	0.458333	0.328767	0.541667	ATF3	ENSG00000162772	Yakut	0.28	0.272857	0.3
Karitiana	chr1:212649295-212811057	212768599	rs1567709	0.458333	0.328767	0.541667	ATF3	ENSG00000162772	CHB	0.213592	0.111005	0.446602
Karitiana	chr1:212649295-212811057	212768599	rs1567709	0.458333	0.328767	0.541667	ATF3	ENSG00000162772	CHS	0.204762	0.36853	0.428571
Karitiana	chr1:212649295-212811057	212768599	rs1567709	0.458333	0.328767	0.541667	ATF3	ENSG00000162772	CLM	0.201087	0.186358	0.233696
Karitiana	chr1:212649295-212811057	212768599	rs1567709	0.458333	0.328767	0.541667	ATF3	ENSG00000162772	Colombian	0.642857	0.526157	0.642857
Karitiana	chr1:212649295-212811057	212768599	rs1567709	0.458333	0.328767	0.541667	ATF3	ENSG00000162772	Daur	0.222222	0.317938	0.444444
Karitiana	chr1:212649295-212811057	212768599	rs1567709	0.458333	0.328767	0.541667	ATF3	ENSG00000162772	Japanese	0.214286	0.233705	0.357143
Karitiana	chr1:212649295-212811057	212768599	rs1567709	0.458333	0.328767	0.541667	ATF3	ENSG00000162772	MXL	0.257812	0.245811	0.28125
Karitiana	chr1:212649295-212811057	212768599	rs1567709	0.458333	0.328767	0.541667	ATF3	ENSG00000162772	Maya	0.666667	0.540241	0.666667
Karitiana	chr1:212649295-212811057	212768599	rs1567709	0.458333	0.328767	0.541667	ATF3	ENSG00000162772	Mongola	0.25	0.305556	0.4
Karitiana	chr1:212649295-212811057	212768599	rs1567709	0.458333	0.328767	0.541667	ATF3	ENSG00000162772	Naxi	0.277778	0.45873	0.5
Karitiana	chr1:212649295-212811057	212768599	rs1567709	0.458333	0.328767	0.541667	ATF3	ENSG00000162772	PEL	0.476471	0.421541	0.511765
Karitiana	chr1:212649295-212811057	212768599	rs1567709	0.458333	0.328767	0.541667	ATF3	ENSG00000162772	Pima	0.428571	0.349207	0.571429
Karitiana	chr1:212649295-212811057	212768599	rs1567709	0.458333	0.328767	0.541667	ATF3	ENSG00000162772	Surui	0.75	0.75	0.75
Karitiana	chr1:212649295-212811057	212768599	rs1567709	0.458333	0.328767	0.541667	ATF3	ENSG00000162772	Yakut	0.28	0.272857	0.3
Karitiana	chr1:212649295-212811057	212769016	rs3122722	0.458333	0.328767	0.541667	ATF3	ENSG00000162772	CHB	0.218447	0.111005	0.446602
Karitiana	chr1:212649295-212811057	212769016	rs3122722	0.458333	0.328767	0.541667	ATF3	ENSG00000162772	CHS	0.204762	0.36853	0.428571
Karitiana	chr1:212649295-212811057	212769016	rs3122722	0.458333	0.328767	0.541667	ATF3	ENSG00000162772	CLM	0.201087	0.186358	0.233696
Karitiana	chr1:212649295-212811057	212769016	rs3122722	0.458333	0.328767	0.541667	ATF3	ENSG00000162772	Colombian	0.642857	0.526157	0.642857
Karitiana	chr1:212649295-212811057	212769016	rs3122722	0.458333	0.328767	0.541667	ATF3	ENSG00000162772	Daur	0.222222	0.317938	0.444444
Karitiana	chr1:212649295-212811057	212769016	rs3122722	0.458333	0.328767	0.541667	ATF3	ENSG00000162772	Japanese	0.214286	0.233705	0.357143
Karitiana	chr1:212649295-212811057	212769016	rs3122722	0.458333	0.328767	0.541667	ATF3	ENSG00000162772	MXL	0.257812	0.245811	0.28125
Karitiana	chr1:212649295-212811057	212769016	rs3122722	0.458333	0.328767	0.541667	ATF3	ENSG00000162772	Maya	0.666667	0.540241	0.666667
Karitiana	chr1:212649295-212811057	212769016	rs3122722	0.458333	0.328767	0.541667	ATF3	ENSG00000162772	Mongola	0.25	0.305556	0.4
Karitiana	chr1:212649295-212811057	212769016	rs3122722	0.458333	0.328767	0.541667	ATF3	ENSG00000162772	Naxi	0.277778	0.45873	0.5
Karitiana	chr1:212649295-212811057	212769016	rs3122722	0.458333	0.328767	0.541667	ATF3	ENSG00000162772	PEL	0.476471	0.421541	0.511765
Karitiana	chr1:212649295-212811057	212769016	rs3122722	0.458333	0.328767	0.541667	ATF3	ENSG00000162772	Pima	0.428571	0.349207	0.571429
Karitiana	chr1:212649295-212811057	212769016	rs3122722	0.458333	0.328767	0.541667	ATF3	ENSG00000162772	Surui	0.75	0.75	0.75
Karitiana	chr1:212649295-212811057	212769016	rs3122722	0.458333	0.328767	0.541667	ATF3	ENSG00000162772	Yakut	0.28	0.272857	0.3
Karitiana	chr1:212649295-212811057	212774757	rs4951625	0.458333	0.328767	0.541667	ATF3	ENSG00000162772	Colombian	0.642857	0.526157	0.642857
Karitiana	chr1:212649295-212811057	212774757	rs4951625	0.458333	0.328767	0.541667	ATF3	ENSG00000162772	MXL	0.25	0.245811	0.28125
Karitiana	chr1:212649295-212811057	212774757	rs4951625	0.458333	0.328767	0.541667	ATF3	ENSG00000162772	Maya	0.619048	0.540241	0.666667
Karitiana	chr1:212649295-212811057	212774757	rs4951625	0.458333	0.328767	0.541667	ATF3	ENSG00000162772	Mongola	0.2	0.305556	0.4
Karitiana	chr1:212649295-212811057	212774757	rs4951625	0.458333	0.328767	0.541667	ATF3	ENSG00000162772	Naxi	0.222222	0.45873	0.5
Karitiana	chr1:212649295-212811057	212774757	rs4951625	0.458333	0.328767	0.541667	ATF3	ENSG00000162772	PEL	0.447059	0.421541	0.511765
Karitiana	chr1:212649295-212811057	212774757	rs4951625	0.458333	0.328767	0.541667	ATF3	ENSG00000162772	Pima	0.392857	0.349207	0.571429
Karitiana	chr1:212649295-212811057	212774757	rs4951625	0.458333	0.328767	0.541667	ATF3	ENSG00000162772	Surui	0.75	0.75	0.75
Karitiana	chr1:212649295-212811057	212774757	rs4951625	0.458333	0.328767	0.541667	ATF3	ENSG00000162772	Yakut	0.24	0.272857	0.3
Karitiana	chr1:212649295-212811057	212775529	rs12564392	0.458333	0.328767	0.541667	ATF3	ENSG00000162772	Colombian	0.642857	0.526157	0.642857
Karitiana	chr1:212649295-212811057	212775529	rs12564392	0.458333	0.328767	0.541667	ATF3	ENSG00000162772	MXL	0.25	0.245811	0.28125
Karitiana	chr1:212649295-212811057	212775529	rs12564392	0.458333	0.328767	0.541667	ATF3	ENSG00000162772	Maya	0.619048	0.540241	0.666667
Karitiana	chr1:212649295-212811057	212775529	rs12564392	0.458333	0.328767	0.541667	ATF3	ENSG00000162772	Mongola	0.2	0.305556	0.4
Karitiana	chr1:212649295-212811057	212775529	rs12564392	0.458333	0.328767	0.541667	ATF3	ENSG00000162772	Naxi	0.222222	0.45873	0.5
Karitiana	chr1:212649295-212811057	212775529	rs12564392	0.458333	0.328767	0.541667	ATF3	ENSG00000162772	PEL	0.447059	0.421541	0.511765
Karitiana	chr1:212649295-212811057	212775529	rs12564392	0.458333	0.328767	0.541667	ATF3	ENSG00000162772	Pima	0.392857	0.349207	0.571429
Karitiana	chr1:212649295-212811057	212775529	rs12564392	0.458333	0.328767	0.541667	ATF3	ENSG00000162772	Surui	0.75	0.75	0.75
Karitiana	chr1:212649295-212811057	212775529	rs12564392	0.458333	0.328767	0.541667	ATF3	ENSG00000162772	Yakut	0.24	0.272857	0.3
Karitiana	chr1:212649295-212811057	212785414	rs11571530	0.458333	0.328767	0.541667	ATF3	ENSG00000162772	Colombian	0.642857	0.526157	0.642857
Karitiana	chr1:212649295-212811057	212785414	rs11571530	0.458333	0.328767	0.541667	ATF3	ENSG00000162772	MXL	0.25	0.245811	0.28125
Karitiana	chr1:212649295-212811057	212785414	rs11571530	0.458333	0.328767	0.541667	ATF3	ENSG00000162772	Maya	0.619048	0.540241	0.666667
Karitiana	chr1:212649295-212811057	212785414	rs11571530	0.458333	0.328767	0.541667	ATF3	ENSG00000162772	Mongola	0.2	0.305556	0.4
Karitiana	chr1:212649295-212811057	212785414	rs11571530	0.458333	0.328767	0.541667	ATF3	ENSG00000162772	Naxi	0.222222	0.45873	0.5
Karitiana	chr1:212649295-212811057	212785414	rs11571530	0.458333	0.328767	0.541667	ATF3	ENSG00000162772	PEL	0.452941	0.421541	0.511765
Karitiana	chr1:212649295-212811057	212785414	rs11571530	0.458333	0.328767	0.541667	ATF3	ENSG00000162772	Pima	0.464286	0.349207	0.571429
Karitiana	chr1:212649295-212811057	212785414	rs11571530	0.458333	0.328767	0.541667	ATF3	ENSG00000162772	Surui	0.75	0.75	0.75
Karitiana	chr1:212649295-212811057	212785414	rs11571530	0.458333	0.328767	0.541667	ATF3	ENSG00000162772	Yakut	0.24	0.272857	0.3
Karitiana	chr1:212649295-212811057	212788567	rs2229346	0.458333	0.328767	0.541667	ATF3	ENSG00000162772	Colombian	0.642857	0.526157	0.642857
Karitiana	chr1:212649295-212811057	212788567	rs2229346	0.458333	0.328767	0.541667	ATF3	ENSG00000162772	MXL	0.25	0.245811	0.28125
Karitiana	chr1:212649295-212811057	212788567	rs2229346	0.458333	0.328767	0.541667	ATF3	ENSG00000162772	Maya	0.619048	0.540241	0.666667
Karitiana	chr1:212649295-212811057	212788567	rs2229346	0.458333	0.328767	0.541667	ATF3	ENSG00000162772	Mongola	0.2	0.305556	0.4
Karitiana	chr1:212649295-212811057	212788567	rs2229346	0.458333	0.328767	0.541667	ATF3	ENSG00000162772	Naxi	0.222222	0.45873	0.5
Karitiana	chr1:212649295-212811057	212788567	rs2229346	0.458333	0.328767	0.541667	ATF3	ENSG00000162772	PEL	0.447059	0.421541	0.511765
Karitiana	chr1:212649295-212811057	212788567	rs2229346	0.458333	0.328767	0.541667	ATF3	ENSG00000162772	Pima	0.464286	0.349207	0.571429
Karitiana	chr1:212649295-212811057	212788567	rs2229346	0.458333	0.328767	0.541667	ATF3	ENSG00000162772	Surui	0.75	0.75	0.75
Karitiana	chr1:212649295-212811057	212788567	rs2229346	0.458333	0.328767	0.541667	ATF3	ENSG00000162772	Yakut	0.24	0.272857	0.3
PEL	chr1:212649295-212811057	212766199	rs1976657	0.470588	0.421541	0.511765	ATF3	ENSG00000162772	CHB	0.218447	0.111005	0.446602
PEL	chr1:212649295-212811057	212766199	rs1976657	0.470588	0.421541	0.511765	ATF3	ENSG00000162772	CHS	0.204762	0.36853	0.428571
PEL	chr1:212649295-212811057	212766199	rs1976657	0.470588	0.421541	0.511765	ATF3	ENSG00000162772	CLM	0.201087	0.186358	0.233696
PEL	chr1:212649295-212811057	212766199	rs1976657	0.470588	0.421541	0.511765	ATF3	ENSG00000162772	Colombian	0.642857	0.526157	0.642857
PEL	chr1:212649295-212811057	212766199	rs1976657	0.470588	0.421541	0.511765	ATF3	ENSG00000162772	Daur	0.222222	0.317938	0.444444
PEL	chr1:212649295-212811057	212766199	rs1976657	0.470588	0.421541	0.511765	ATF3	ENSG00000162772	Japanese	0.214286	0.233705	0.357143
PEL	chr1:212649295-212811057	212766199	rs1976657	0.470588	0.421541	0.511765	ATF3	ENSG00000162772	Karitiana	0.458333	0.328767	0.541667
PEL	chr1:212649295-212811057	212766199	rs1976657	0.470588	0.421541	0.511765	ATF3	ENSG00000162772	MXL	0.257812	0.245811	0.28125
PEL	chr1:212649295-212811057	212766199	rs1976657	0.470588	0.421541	0.511765	ATF3	ENSG00000162772	Maya	0.666667	0.540241	0.666667
PEL	chr1:212649295-212811057	212766199	rs1976657	0.470588	0.421541	0.511765	ATF3	ENSG00000162772	Mongola	0.25	0.305556	0.4
PEL	chr1:212649295-212811057	212766199	rs1976657	0.470588	0.421541	0.511765	ATF3	ENSG00000162772	Naxi	0.277778	0.45873	0.5
PEL	chr1:212649295-212811057	212766199	rs1976657	0.470588	0.421541	0.511765	ATF3	ENSG00000162772	Pima	0.428571	0.349207	0.571429
PEL	chr1:212649295-212811057	212766199	rs1976657	0.470588	0.421541	0.511765	ATF3	ENSG00000162772	Surui	0.75	0.75	0.75
PEL	chr1:212649295-212811057	212766199	rs1976657	0.470588	0.421541	0.511765	ATF3	ENSG00000162772	Yakut	0.28	0.272857	0.3
PEL	chr1:212649295-212811057	212768599	rs1567709	0.476471	0.421541	0.511765	ATF3	ENSG00000162772	CHB	0.213592	0.111005	0.446602
PEL	chr1:212649295-212811057	212768599	rs1567709	0.476471	0.421541	0.511765	ATF3	ENSG00000162772	CHS	0.204762	0.36853	0.428571
PEL	chr1:212649295-212811057	212768599	rs1567709	0.476471	0.421541	0.511765	ATF3	ENSG00000162772	CLM	0.201087	0.186358	0.233696
PEL	chr1:212649295-212811057	212768599	rs1567709	0.476471	0.421541	0.511765	ATF3	ENSG00000162772	Colombian	0.642857	0.526157	0.642857
PEL	chr1:212649295-212811057	212768599	rs1567709	0.476471	0.421541	0.511765	ATF3	ENSG00000162772	Daur	0.222222	0.317938	0.444444
PEL	chr1:212649295-212811057	212768599	rs1567709	0.476471	0.421541	0.511765	ATF3	ENSG00000162772	Japanese	0.214286	0.233705	0.357143
PEL	chr1:212649295-212811057	212768599	rs1567709	0.476471	0.421541	0.511765	ATF3	ENSG00000162772	Karitiana	0.458333	0.328767	0.541667
PEL	chr1:212649295-212811057	212768599	rs1567709	0.476471	0.421541	0.511765	ATF3	ENSG00000162772	MXL	0.257812	0.245811	0.28125
PEL	chr1:212649295-212811057	212768599	rs1567709	0.476471	0.421541	0.511765	ATF3	ENSG00000162772	Maya	0.666667	0.540241	0.666667
PEL	chr1:212649295-212811057	212768599	rs1567709	0.476471	0.421541	0.511765	ATF3	ENSG00000162772	Mongola	0.25	0.305556	0.4
PEL	chr1:212649295-212811057	212768599	rs1567709	0.476471	0.421541	0.511765	ATF3	ENSG00000162772	Naxi	0.277778	0.45873	0.5
PEL	chr1:212649295-212811057	212768599	rs1567709	0.476471	0.421541	0.511765	ATF3	ENSG00000162772	Pima	0.428571	0.349207	0.571429
PEL	chr1:212649295-212811057	212768599	rs1567709	0.476471	0.421541	0.511765	ATF3	ENSG00000162772	Surui	0.75	0.75	0.75
PEL	chr1:212649295-212811057	212768599	rs1567709	0.476471	0.421541	0.511765	ATF3	ENSG00000162772	Yakut	0.28	0.272857	0.3
PEL	chr1:212649295-212811057	212769016	rs3122722	0.476471	0.421541	0.511765	ATF3	ENSG00000162772	CHB	0.218447	0.111005	0.446602
PEL	chr1:212649295-212811057	212769016	rs3122722	0.476471	0.421541	0.511765	ATF3	ENSG00000162772	CHS	0.204762	0.36853	0.428571
PEL	chr1:212649295-212811057	212769016	rs3122722	0.476471	0.421541	0.511765	ATF3	ENSG00000162772	CLM	0.201087	0.186358	0.233696
PEL	chr1:212649295-212811057	212769016	rs3122722	0.476471	0.421541	0.511765	ATF3	ENSG00000162772	Colombian	0.642857	0.526157	0.642857
PEL	chr1:212649295-212811057	212769016	rs3122722	0.476471	0.421541	0.511765	ATF3	ENSG00000162772	Daur	0.222222	0.317938	0.444444
PEL	chr1:212649295-212811057	212769016	rs3122722	0.476471	0.421541	0.511765	ATF3	ENSG00000162772	Japanese	0.214286	0.233705	0.357143
PEL	chr1:212649295-212811057	212769016	rs3122722	0.476471	0.421541	0.511765	ATF3	ENSG00000162772	Karitiana	0.458333	0.328767	0.541667
PEL	chr1:212649295-212811057	212769016	rs3122722	0.476471	0.421541	0.511765	ATF3	ENSG00000162772	MXL	0.257812	0.245811	0.28125
PEL	chr1:212649295-212811057	212769016	rs3122722	0.476471	0.421541	0.511765	ATF3	ENSG00000162772	Maya	0.666667	0.540241	0.666667
PEL	chr1:212649295-212811057	212769016	rs3122722	0.476471	0.421541	0.511765	ATF3	ENSG00000162772	Mongola	0.25	0.305556	0.4
PEL	chr1:212649295-212811057	212769016	rs3122722	0.476471	0.421541	0.511765	ATF3	ENSG00000162772	Naxi	0.277778	0.45873	0.5
PEL	chr1:212649295-212811057	212769016	rs3122722	0.476471	0.421541	0.511765	ATF3	ENSG00000162772	Pima	0.428571	0.349207	0.571429
PEL	chr1:212649295-212811057	212769016	rs3122722	0.476471	0.421541	0.511765	ATF3	ENSG00000162772	Surui	0.75	0.75	0.75
PEL	chr1:212649295-212811057	212769016	rs3122722	0.476471	0.421541	0.511765	ATF3	ENSG00000162772	Yakut	0.28	0.272857	0.3
Pima	chr1:212649295-212811057	212758604	rs1105899	0.5	0.349207	0.571429	ATF3	ENSG00000162772	CHB	0.354369	0.111005	0.446602
Pima	chr1:212649295-212811057	212758604	rs1105899	0.5	0.349207	0.571429	ATF3	ENSG00000162772	CHS	0.395238	0.36853	0.428571
Pima	chr1:212649295-212811057	212758604	rs1105899	0.5	0.349207	0.571429	ATF3	ENSG00000162772	Colombian	0.5	0.526157	0.642857
Pima	chr1:212649295-212811057	212758604	rs1105899	0.5	0.349207	0.571429	ATF3	ENSG00000162772	Dai	0.277778	0.186806	0.277778
Pima	chr1:212649295-212811057	212758604	rs1105899	0.5	0.349207	0.571429	ATF3	ENSG00000162772	Daur	0.388889	0.317938	0.444444
Pima	chr1:212649295-212811057	212758604	rs1105899	0.5	0.349207	0.571429	ATF3	ENSG00000162772	JPT	0.264706	0.225703	0.284314
Pima	chr1:212649295-212811057	212758604	rs1105899	0.5	0.349207	0.571429	ATF3	ENSG00000162772	Japanese	0.339286	0.233705	0.357143
Pima	chr1:212649295-212811057	212758604	rs1105899	0.5	0.349207	0.571429	ATF3	ENSG00000162772	KHV	0.277778	0.284731	0.328283
Pima	chr1:212649295-212811057	212758604	rs1105899	0.5	0.349207	0.571429	ATF3	ENSG00000162772	Karitiana	0.541667	0.328767	0.541667
Pima	chr1:212649295-212811057	212758604	rs1105899	0.5	0.349207	0.571429	ATF3	ENSG00000162772	Maya	0.571429	0.540241	0.666667
Pima	chr1:212649295-212811057	212758604	rs1105899	0.5	0.349207	0.571429	ATF3	ENSG00000162772	Miao	0.35	0.407627	0.45
Pima	chr1:212649295-212811057	212758604	rs1105899	0.5	0.349207	0.571429	ATF3	ENSG00000162772	Mongola	0.35	0.305556	0.4
Pima	chr1:212649295-212811057	212758604	rs1105899	0.5	0.349207	0.571429	ATF3	ENSG00000162772	Naxi	0.5	0.45873	0.5
Pima	chr1:212649295-212811057	212758604	rs1105899	0.5	0.349207	0.571429	ATF3	ENSG00000162772	PEL	0.394118	0.421541	0.511765
Pima	chr1:212649295-212811057	212758604	rs1105899	0.5	0.349207	0.571429	ATF3	ENSG00000162772	Surui	0.75	0.75	0.75
Pima	chr1:212649295-212811057	212758604	rs1105899	0.5	0.349207	0.571429	ATF3	ENSG00000162772	Tu	0.25	0.200868	0.375
Pima	chr1:212649295-212811057	212758604	rs1105899	0.5	0.349207	0.571429	ATF3	ENSG00000162772	Xibo	0.222222	0.0918274	0.333333
Pima	chr1:212649295-212811057	212758604	rs1105899	0.5	0.349207	0.571429	ATF3	ENSG00000162772	Yakut	0.26	0.272857	0.3
Karitiana	chr1:212649295-212811057	212758392	rs4951618	0.541667	0.328767	0.541667	ATF3	ENSG00000162772	CHB	0.354369	0.111005	0.446602
Karitiana	chr1:212649295-212811057	212758392	rs4951618	0.541667	0.328767	0.541667	ATF3	ENSG00000162772	CHS	0.380952	0.36853	0.428571
Karitiana	chr1:212649295-212811057	212758392	rs4951618	0.541667	0.328767	0.541667	ATF3	ENSG00000162772	Cambodian	0.3	0.276562	0.35
Karitiana	chr1:212649295-212811057	212758392	rs4951618	0.541667	0.328767	0.541667	ATF3	ENSG00000162772	Colombian	0.5	0.526157	0.642857
Karitiana	chr1:212649295-212811057	212758392	rs4951618	0.541667	0.328767	0.541667	ATF3	ENSG00000162772	Dai	0.277778	0.186806	0.277778
Karitiana	chr1:212649295-212811057	212758392	rs4951618	0.541667	0.328767	0.541667	ATF3	ENSG00000162772	Daur	0.444444	0.317938	0.444444
Karitiana	chr1:212649295-212811057	212758392	rs4951618	0.541667	0.328767	0.541667	ATF3	ENSG00000162772	Hezhen	0.277778	0.258454	0.388889
Karitiana	chr1:212649295-212811057	212758392	rs4951618	0.541667	0.328767	0.541667	ATF3	ENSG00000162772	JPT	0.254902	0.225703	0.284314
Karitiana	chr1:212649295-212811057	212758392	rs4951618	0.541667	0.328767	0.541667	ATF3	ENSG00000162772	Japanese	0.285714	0.233705	0.357143
Karitiana	chr1:212649295-212811057	212758392	rs4951618	0.541667	0.328767	0.541667	ATF3	ENSG00000162772	KHV	0.287879	0.284731	0.328283
Karitiana	chr1:212649295-212811057	212758392	rs4951618	0.541667	0.328767	0.541667	ATF3	ENSG00000162772	MXL	0.273438	0.245811	0.28125
Karitiana	chr1:212649295-212811057	212758392	rs4951618	0.541667	0.328767	0.541667	ATF3	ENSG00000162772	Maya	0.571429	0.540241	0.666667
Karitiana	chr1:212649295-212811057	212758392	rs4951618	0.541667	0.328767	0.541667	ATF3	ENSG00000162772	Miao	0.35	0.407627	0.45
Karitiana	chr1:212649295-212811057	212758392	rs4951618	0.541667	0.328767	0.541667	ATF3	ENSG00000162772	Mongola	0.35	0.305556	0.4
Karitiana	chr1:212649295-212811057	212758392	rs4951618	0.541667	0.328767	0.541667	ATF3	ENSG00000162772	Naxi	0.5	0.45873	0.5
Karitiana	chr1:212649295-212811057	212758392	rs4951618	0.541667	0.328767	0.541667	ATF3	ENSG00000162772	PEL	0.405882	0.421541	0.511765
Karitiana	chr1:212649295-212811057	212758392	rs4951618	0.541667	0.328767	0.541667	ATF3	ENSG00000162772	PUR	0.225962	0.169384	0.225962
Karitiana	chr1:212649295-212811057	212758392	rs4951618	0.541667	0.328767	0.541667	ATF3	ENSG00000162772	Pima	0.571429	0.349207	0.571429
Karitiana	chr1:212649295-212811057	212758392	rs4951618	0.541667	0.328767	0.541667	ATF3	ENSG00000162772	Surui	0.75	0.75	0.75
Karitiana	chr1:212649295-212811057	212758392	rs4951618	0.541667	0.328767	0.541667	ATF3	ENSG00000162772	Tu	0.3125	0.200868	0.375
Karitiana	chr1:212649295-212811057	212758392	rs4951618	0.541667	0.328767	0.541667	ATF3	ENSG00000162772	Xibo	0.222222	0.0918274	0.333333
Karitiana	chr1:212649295-212811057	212758392	rs4951618	0.541667	0.328767	0.541667	ATF3	ENSG00000162772	Yakut	0.26	0.272857	0.3
Karitiana	chr1:212649295-212811057	212758604	rs1105899	0.541667	0.328767	0.541667	ATF3	ENSG00000162772	CHB	0.354369	0.111005	0.446602
Karitiana	chr1:212649295-212811057	212758604	rs1105899	0.541667	0.328767	0.541667	ATF3	ENSG00000162772	CHS	0.395238	0.36853	0.428571
Karitiana	chr1:212649295-212811057	212758604	rs1105899	0.541667	0.328767	0.541667	ATF3	ENSG00000162772	Colombian	0.5	0.526157	0.642857
Karitiana	chr1:212649295-212811057	212758604	rs1105899	0.541667	0.328767	0.541667	ATF3	ENSG00000162772	Dai	0.277778	0.186806	0.277778
Karitiana	chr1:212649295-212811057	212758604	rs1105899	0.541667	0.328767	0.541667	ATF3	ENSG00000162772	Daur	0.388889	0.317938	0.444444
Karitiana	chr1:212649295-212811057	212758604	rs1105899	0.541667	0.328767	0.541667	ATF3	ENSG00000162772	JPT	0.264706	0.225703	0.284314
Karitiana	chr1:212649295-212811057	212758604	rs1105899	0.541667	0.328767	0.541667	ATF3	ENSG00000162772	Japanese	0.339286	0.233705	0.357143
Karitiana	chr1:212649295-212811057	212758604	rs1105899	0.541667	0.328767	0.541667	ATF3	ENSG00000162772	KHV	0.277778	0.284731	0.328283
Karitiana	chr1:212649295-212811057	212758604	rs1105899	0.541667	0.328767	0.541667	ATF3	ENSG00000162772	Maya	0.571429	0.540241	0.666667
Karitiana	chr1:212649295-212811057	212758604	rs1105899	0.541667	0.328767	0.541667	ATF3	ENSG00000162772	Miao	0.35	0.407627	0.45
Karitiana	chr1:212649295-212811057	212758604	rs1105899	0.541667	0.328767	0.541667	ATF3	ENSG00000162772	Mongola	0.35	0.305556	0.4
Karitiana	chr1:212649295-212811057	212758604	rs1105899	0.541667	0.328767	0.541667	ATF3	ENSG00000162772	Naxi	0.5	0.45873	0.5
Karitiana	chr1:212649295-212811057	212758604	rs1105899	0.541667	0.328767	0.541667	ATF3	ENSG00000162772	PEL	0.394118	0.421541	0.511765
Karitiana	chr1:212649295-212811057	212758604	rs1105899	0.541667	0.328767	0.541667	ATF3	ENSG00000162772	Pima	0.5	0.349207	0.571429
Karitiana	chr1:212649295-212811057	212758604	rs1105899	0.541667	0.328767	0.541667	ATF3	ENSG00000162772	Surui	0.75	0.75	0.75
Karitiana	chr1:212649295-212811057	212758604	rs1105899	0.541667	0.328767	0.541667	ATF3	ENSG00000162772	Tu	0.25	0.200868	0.375
Karitiana	chr1:212649295-212811057	212758604	rs1105899	0.541667	0.328767	0.541667	ATF3	ENSG00000162772	Xibo	0.222222	0.0918274	0.333333
Karitiana	chr1:212649295-212811057	212758604	rs1105899	0.541667	0.328767	0.541667	ATF3	ENSG00000162772	Yakut	0.26	0.272857	0.3
Karitiana	chr1:212649295-212811057	212759493	rs6674072	0.541667	0.328767	0.541667	ATF3	ENSG00000162772	CHB	0.334951	0.111005	0.446602
Karitiana	chr1:212649295-212811057	212759493	rs6674072	0.541667	0.328767	0.541667	ATF3	ENSG00000162772	CHS	0.371429	0.36853	0.428571
Karitiana	chr1:212649295-212811057	212759493	rs6674072	0.541667	0.328767	0.541667	ATF3	ENSG00000162772	Cambodian	0.25	0.276562	0.35
Karitiana	chr1:212649295-212811057	212759493	rs6674072	0.541667	0.328767	0.541667	ATF3	ENSG00000162772	Colombian	0.5	0.526157	0.642857
Karitiana	chr1:212649295-212811057	212759493	rs6674072	0.541667	0.328767	0.541667	ATF3	ENSG00000162772	Dai	0.277778	0.186806	0.277778
Karitiana	chr1:212649295-212811057	212759493	rs6674072	0.541667	0.328767	0.541667	ATF3	ENSG00000162772	Daur	0.444444	0.317938	0.444444
Karitiana	chr1:212649295-212811057	212759493	rs6674072	0.541667	0.328767	0.541667	ATF3	ENSG00000162772	Hezhen	0.277778	0.258454	0.388889
Karitiana	chr1:212649295-212811057	212759493	rs6674072	0.541667	0.328767	0.541667	ATF3	ENSG00000162772	JPT	0.254902	0.225703	0.284314
Karitiana	chr1:212649295-212811057	212759493	rs6674072	0.541667	0.328767	0.541667	ATF3	ENSG00000162772	Japanese	0.303571	0.233705	0.357143
Karitiana	chr1:212649295-212811057	212759493	rs6674072	0.541667	0.328767	0.541667	ATF3	ENSG00000162772	KHV	0.277778	0.284731	0.328283
Karitiana	chr1:212649295-212811057	212759493	rs6674072	0.541667	0.328767	0.541667	ATF3	ENSG00000162772	MXL	0.273438	0.245811	0.28125
Karitiana	chr1:212649295-212811057	212759493	rs6674072	0.541667	0.328767	0.541667	ATF3	ENSG00000162772	Maya	0.571429	0.540241	0.666667
Karitiana	chr1:212649295-212811057	212759493	rs6674072	0.541667	0.328767	0.541667	ATF3	ENSG00000162772	Miao	0.35	0.407627	0.45
Karitiana	chr1:212649295-212811057	212759493	rs6674072	0.541667	0.328767	0.541667	ATF3	ENSG00000162772	Mongola	0.35	0.305556	0.4
Karitiana	chr1:212649295-212811057	212759493	rs6674072	0.541667	0.328767	0.541667	ATF3	ENSG00000162772	Naxi	0.5	0.45873	0.5
Karitiana	chr1:212649295-212811057	212759493	rs6674072	0.541667	0.328767	0.541667	ATF3	ENSG00000162772	PEL	0.405882	0.421541	0.511765
Karitiana	chr1:212649295-212811057	212759493	rs6674072	0.541667	0.328767	0.541667	ATF3	ENSG00000162772	Pima	0.464286	0.349207	0.571429
Karitiana	chr1:212649295-212811057	212759493	rs6674072	0.541667	0.328767	0.541667	ATF3	ENSG00000162772	Surui	0.75	0.75	0.75
Karitiana	chr1:212649295-212811057	212759493	rs6674072	0.541667	0.328767	0.541667	ATF3	ENSG00000162772	Tu	0.25	0.200868	0.375
Karitiana	chr1:212649295-212811057	212759493	rs6674072	0.541667	0.328767	0.541667	ATF3	ENSG00000162772	Xibo	0.277778	0.0918274	0.333333
Karitiana	chr1:212649295-212811057	212759493	rs6674072	0.541667	0.328767	0.541667	ATF3	ENSG00000162772	Yakut	0.28	0.272857	0.3
Pima	chr1:212649295-212811057	212758392	rs4951618	0.571429	0.349207	0.571429	ATF3	ENSG00000162772	CHB	0.354369	0.111005	0.446602
Pima	chr1:212649295-212811057	212758392	rs4951618	0.571429	0.349207	0.571429	ATF3	ENSG00000162772	CHS	0.380952	0.36853	0.428571
Pima	chr1:212649295-212811057	212758392	rs4951618	0.571429	0.349207	0.571429	ATF3	ENSG00000162772	Cambodian	0.3	0.276562	0.35
Pima	chr1:212649295-212811057	212758392	rs4951618	0.571429	0.349207	0.571429	ATF3	ENSG00000162772	Colombian	0.5	0.526157	0.642857
Pima	chr1:212649295-212811057	212758392	rs4951618	0.571429	0.349207	0.571429	ATF3	ENSG00000162772	Dai	0.277778	0.186806	0.277778
Pima	chr1:212649295-212811057	212758392	rs4951618	0.571429	0.349207	0.571429	ATF3	ENSG00000162772	Daur	0.444444	0.317938	0.444444
Pima	chr1:212649295-212811057	212758392	rs4951618	0.571429	0.349207	0.571429	ATF3	ENSG00000162772	Hezhen	0.277778	0.258454	0.388889
Pima	chr1:212649295-212811057	212758392	rs4951618	0.571429	0.349207	0.571429	ATF3	ENSG00000162772	JPT	0.254902	0.225703	0.284314
Pima	chr1:212649295-212811057	212758392	rs4951618	0.571429	0.349207	0.571429	ATF3	ENSG00000162772	Japanese	0.285714	0.233705	0.357143
Pima	chr1:212649295-212811057	212758392	rs4951618	0.571429	0.349207	0.571429	ATF3	ENSG00000162772	KHV	0.287879	0.284731	0.328283
Pima	chr1:212649295-212811057	212758392	rs4951618	0.571429	0.349207	0.571429	ATF3	ENSG00000162772	Karitiana	0.541667	0.328767	0.541667
Pima	chr1:212649295-212811057	212758392	rs4951618	0.571429	0.349207	0.571429	ATF3	ENSG00000162772	MXL	0.273438	0.245811	0.28125
Pima	chr1:212649295-212811057	212758392	rs4951618	0.571429	0.349207	0.571429	ATF3	ENSG00000162772	Maya	0.571429	0.540241	0.666667
Pima	chr1:212649295-212811057	212758392	rs4951618	0.571429	0.349207	0.571429	ATF3	ENSG00000162772	Miao	0.35	0.407627	0.45
Pima	chr1:212649295-212811057	212758392	rs4951618	0.571429	0.349207	0.571429	ATF3	ENSG00000162772	Mongola	0.35	0.305556	0.4
Pima	chr1:212649295-212811057	212758392	rs4951618	0.571429	0.349207	0.571429	ATF3	ENSG00000162772	Naxi	0.5	0.45873	0.5
Pima	chr1:212649295-212811057	212758392	rs4951618	0.571429	0.349207	0.571429	ATF3	ENSG00000162772	PEL	0.405882	0.421541	0.511765
Pima	chr1:212649295-212811057	212758392	rs4951618	0.571429	0.349207	0.571429	ATF3	ENSG00000162772	PUR	0.225962	0.169384	0.225962
Pima	chr1:212649295-212811057	212758392	rs4951618	0.571429	0.349207	0.571429	ATF3	ENSG00000162772	Surui	0.75	0.75	0.75
Pima	chr1:212649295-212811057	212758392	rs4951618	0.571429	0.349207	0.571429	ATF3	ENSG00000162772	Tu	0.3125	0.200868	0.375
Pima	chr1:212649295-212811057	212758392	rs4951618	0.571429	0.349207	0.571429	ATF3	ENSG00000162772	Xibo	0.222222	0.0918274	0.333333
Pima	chr1:212649295-212811057	212758392	rs4951618	0.571429	0.349207	0.571429	ATF3	ENSG00000162772	Yakut	0.26	0.272857	0.3
Maya	chr1:212649295-212811057	212758392	rs4951618	0.571429	0.540241	0.666667	ATF3	ENSG00000162772	CHB	0.354369	0.111005	0.446602
Maya	chr1:212649295-212811057	212758392	rs4951618	0.571429	0.540241	0.666667	ATF3	ENSG00000162772	CHS	0.380952	0.36853	0.428571
Maya	chr1:212649295-212811057	212758392	rs4951618	0.571429	0.540241	0.666667	ATF3	ENSG00000162772	Cambodian	0.3	0.276562	0.35
Maya	chr1:212649295-212811057	212758392	rs4951618	0.571429	0.540241	0.666667	ATF3	ENSG00000162772	Colombian	0.5	0.526157	0.642857
Maya	chr1:212649295-212811057	212758392	rs4951618	0.571429	0.540241	0.666667	ATF3	ENSG00000162772	Dai	0.277778	0.186806	0.277778
Maya	chr1:212649295-212811057	212758392	rs4951618	0.571429	0.540241	0.666667	ATF3	ENSG00000162772	Daur	0.444444	0.317938	0.444444
Maya	chr1:212649295-212811057	212758392	rs4951618	0.571429	0.540241	0.666667	ATF3	ENSG00000162772	Hezhen	0.277778	0.258454	0.388889
Maya	chr1:212649295-212811057	212758392	rs4951618	0.571429	0.540241	0.666667	ATF3	ENSG00000162772	JPT	0.254902	0.225703	0.284314
Maya	chr1:212649295-212811057	212758392	rs4951618	0.571429	0.540241	0.666667	ATF3	ENSG00000162772	Japanese	0.285714	0.233705	0.357143
Maya	chr1:212649295-212811057	212758392	rs4951618	0.571429	0.540241	0.666667	ATF3	ENSG00000162772	KHV	0.287879	0.284731	0.328283
Maya	chr1:212649295-212811057	212758392	rs4951618	0.571429	0.540241	0.666667	ATF3	ENSG00000162772	Karitiana	0.541667	0.328767	0.541667
Maya	chr1:212649295-212811057	212758392	rs4951618	0.571429	0.540241	0.666667	ATF3	ENSG00000162772	MXL	0.273438	0.245811	0.28125
Maya	chr1:212649295-212811057	212758392	rs4951618	0.571429	0.540241	0.666667	ATF3	ENSG00000162772	Miao	0.35	0.407627	0.45
Maya	chr1:212649295-212811057	212758392	rs4951618	0.571429	0.540241	0.666667	ATF3	ENSG00000162772	Mongola	0.35	0.305556	0.4
Maya	chr1:212649295-212811057	212758392	rs4951618	0.571429	0.540241	0.666667	ATF3	ENSG00000162772	Naxi	0.5	0.45873	0.5
Maya	chr1:212649295-212811057	212758392	rs4951618	0.571429	0.540241	0.666667	ATF3	ENSG00000162772	PEL	0.405882	0.421541	0.511765
Maya	chr1:212649295-212811057	212758392	rs4951618	0.571429	0.540241	0.666667	ATF3	ENSG00000162772	PUR	0.225962	0.169384	0.225962
Maya	chr1:212649295-212811057	212758392	rs4951618	0.571429	0.540241	0.666667	ATF3	ENSG00000162772	Pima	0.571429	0.349207	0.571429
Maya	chr1:212649295-212811057	212758392	rs4951618	0.571429	0.540241	0.666667	ATF3	ENSG00000162772	Surui	0.75	0.75	0.75
Maya	chr1:212649295-212811057	212758392	rs4951618	0.571429	0.540241	0.666667	ATF3	ENSG00000162772	Tu	0.3125	0.200868	0.375
Maya	chr1:212649295-212811057	212758392	rs4951618	0.571429	0.540241	0.666667	ATF3	ENSG00000162772	Xibo	0.222222	0.0918274	0.333333
Maya	chr1:212649295-212811057	212758392	rs4951618	0.571429	0.540241	0.666667	ATF3	ENSG00000162772	Yakut	0.26	0.272857	0.3
Maya	chr1:212649295-212811057	212758604	rs1105899	0.571429	0.540241	0.666667	ATF3	ENSG00000162772	CHB	0.354369	0.111005	0.446602
Maya	chr1:212649295-212811057	212758604	rs1105899	0.571429	0.540241	0.666667	ATF3	ENSG00000162772	CHS	0.395238	0.36853	0.428571
Maya	chr1:212649295-212811057	212758604	rs1105899	0.571429	0.540241	0.666667	ATF3	ENSG00000162772	Colombian	0.5	0.526157	0.642857
Maya	chr1:212649295-212811057	212758604	rs1105899	0.571429	0.540241	0.666667	ATF3	ENSG00000162772	Dai	0.277778	0.186806	0.277778
Maya	chr1:212649295-212811057	212758604	rs1105899	0.571429	0.540241	0.666667	ATF3	ENSG00000162772	Daur	0.388889	0.317938	0.444444
Maya	chr1:212649295-212811057	212758604	rs1105899	0.571429	0.540241	0.666667	ATF3	ENSG00000162772	JPT	0.264706	0.225703	0.284314
Maya	chr1:212649295-212811057	212758604	rs1105899	0.571429	0.540241	0.666667	ATF3	ENSG00000162772	Japanese	0.339286	0.233705	0.357143
Maya	chr1:212649295-212811057	212758604	rs1105899	0.571429	0.540241	0.666667	ATF3	ENSG00000162772	KHV	0.277778	0.284731	0.328283
Maya	chr1:212649295-212811057	212758604	rs1105899	0.571429	0.540241	0.666667	ATF3	ENSG00000162772	Karitiana	0.541667	0.328767	0.541667
Maya	chr1:212649295-212811057	212758604	rs1105899	0.571429	0.540241	0.666667	ATF3	ENSG00000162772	Miao	0.35	0.407627	0.45
Maya	chr1:212649295-212811057	212758604	rs1105899	0.571429	0.540241	0.666667	ATF3	ENSG00000162772	Mongola	0.35	0.305556	0.4
Maya	chr1:212649295-212811057	212758604	rs1105899	0.571429	0.540241	0.666667	ATF3	ENSG00000162772	Naxi	0.5	0.45873	0.5
Maya	chr1:212649295-212811057	212758604	rs1105899	0.571429	0.540241	0.666667	ATF3	ENSG00000162772	PEL	0.394118	0.421541	0.511765
Maya	chr1:212649295-212811057	212758604	rs1105899	0.571429	0.540241	0.666667	ATF3	ENSG00000162772	Pima	0.5	0.349207	0.571429
Maya	chr1:212649295-212811057	212758604	rs1105899	0.571429	0.540241	0.666667	ATF3	ENSG00000162772	Surui	0.75	0.75	0.75
Maya	chr1:212649295-212811057	212758604	rs1105899	0.571429	0.540241	0.666667	ATF3	ENSG00000162772	Tu	0.25	0.200868	0.375
Maya	chr1:212649295-212811057	212758604	rs1105899	0.571429	0.540241	0.666667	ATF3	ENSG00000162772	Xibo	0.222222	0.0918274	0.333333
Maya	chr1:212649295-212811057	212758604	rs1105899	0.571429	0.540241	0.666667	ATF3	ENSG00000162772	Yakut	0.26	0.272857	0.3
Maya	chr1:212649295-212811057	212759493	rs6674072	0.571429	0.540241	0.666667	ATF3	ENSG00000162772	CHB	0.334951	0.111005	0.446602
Maya	chr1:212649295-212811057	212759493	rs6674072	0.571429	0.540241	0.666667	ATF3	ENSG00000162772	CHS	0.371429	0.36853	0.428571
Maya	chr1:212649295-212811057	212759493	rs6674072	0.571429	0.540241	0.666667	ATF3	ENSG00000162772	Cambodian	0.25	0.276562	0.35
Maya	chr1:212649295-212811057	212759493	rs6674072	0.571429	0.540241	0.666667	ATF3	ENSG00000162772	Colombian	0.5	0.526157	0.642857
Maya	chr1:212649295-212811057	212759493	rs6674072	0.571429	0.540241	0.666667	ATF3	ENSG00000162772	Dai	0.277778	0.186806	0.277778
Maya	chr1:212649295-212811057	212759493	rs6674072	0.571429	0.540241	0.666667	ATF3	ENSG00000162772	Daur	0.444444	0.317938	0.444444
Maya	chr1:212649295-212811057	212759493	rs6674072	0.571429	0.540241	0.666667	ATF3	ENSG00000162772	Hezhen	0.277778	0.258454	0.388889
Maya	chr1:212649295-212811057	212759493	rs6674072	0.571429	0.540241	0.666667	ATF3	ENSG00000162772	JPT	0.254902	0.225703	0.284314
Maya	chr1:212649295-212811057	212759493	rs6674072	0.571429	0.540241	0.666667	ATF3	ENSG00000162772	Japanese	0.303571	0.233705	0.357143
Maya	chr1:212649295-212811057	212759493	rs6674072	0.571429	0.540241	0.666667	ATF3	ENSG00000162772	KHV	0.277778	0.284731	0.328283
Maya	chr1:212649295-212811057	212759493	rs6674072	0.571429	0.540241	0.666667	ATF3	ENSG00000162772	Karitiana	0.541667	0.328767	0.541667
Maya	chr1:212649295-212811057	212759493	rs6674072	0.571429	0.540241	0.666667	ATF3	ENSG00000162772	MXL	0.273438	0.245811	0.28125
Maya	chr1:212649295-212811057	212759493	rs6674072	0.571429	0.540241	0.666667	ATF3	ENSG00000162772	Miao	0.35	0.407627	0.45
Maya	chr1:212649295-212811057	212759493	rs6674072	0.571429	0.540241	0.666667	ATF3	ENSG00000162772	Mongola	0.35	0.305556	0.4
Maya	chr1:212649295-212811057	212759493	rs6674072	0.571429	0.540241	0.666667	ATF3	ENSG00000162772	Naxi	0.5	0.45873	0.5
Maya	chr1:212649295-212811057	212759493	rs6674072	0.571429	0.540241	0.666667	ATF3	ENSG00000162772	PEL	0.405882	0.421541	0.511765
Maya	chr1:212649295-212811057	212759493	rs6674072	0.571429	0.540241	0.666667	ATF3	ENSG00000162772	Pima	0.464286	0.349207	0.571429
Maya	chr1:212649295-212811057	212759493	rs6674072	0.571429	0.540241	0.666667	ATF3	ENSG00000162772	Surui	0.75	0.75	0.75
Maya	chr1:212649295-212811057	212759493	rs6674072	0.571429	0.540241	0.666667	ATF3	ENSG00000162772	Tu	0.25	0.200868	0.375
Maya	chr1:212649295-212811057	212759493	rs6674072	0.571429	0.540241	0.666667	ATF3	ENSG00000162772	Xibo	0.277778	0.0918274	0.333333
Maya	chr1:212649295-212811057	212759493	rs6674072	0.571429	0.540241	0.666667	ATF3	ENSG00000162772	Yakut	0.28	0.272857	0.3
Maya	chr1:212649295-212811057	212774757	rs4951625	0.619048	0.540241	0.666667	ATF3	ENSG00000162772	Colombian	0.642857	0.526157	0.642857
Maya	chr1:212649295-212811057	212774757	rs4951625	0.619048	0.540241	0.666667	ATF3	ENSG00000162772	Karitiana	0.458333	0.328767	0.541667
Maya	chr1:212649295-212811057	212774757	rs4951625	0.619048	0.540241	0.666667	ATF3	ENSG00000162772	MXL	0.25	0.245811	0.28125
Maya	chr1:212649295-212811057	212774757	rs4951625	0.619048	0.540241	0.666667	ATF3	ENSG00000162772	Mongola	0.2	0.305556	0.4
Maya	chr1:212649295-212811057	212774757	rs4951625	0.619048	0.540241	0.666667	ATF3	ENSG00000162772	Naxi	0.222222	0.45873	0.5
Maya	chr1:212649295-212811057	212774757	rs4951625	0.619048	0.540241	0.666667	ATF3	ENSG00000162772	PEL	0.447059	0.421541	0.511765
Maya	chr1:212649295-212811057	212774757	rs4951625	0.619048	0.540241	0.666667	ATF3	ENSG00000162772	Pima	0.392857	0.349207	0.571429
Maya	chr1:212649295-212811057	212774757	rs4951625	0.619048	0.540241	0.666667	ATF3	ENSG00000162772	Surui	0.75	0.75	0.75
Maya	chr1:212649295-212811057	212774757	rs4951625	0.619048	0.540241	0.666667	ATF3	ENSG00000162772	Yakut	0.24	0.272857	0.3
Maya	chr1:212649295-212811057	212775529	rs12564392	0.619048	0.540241	0.666667	ATF3	ENSG00000162772	Colombian	0.642857	0.526157	0.642857
Maya	chr1:212649295-212811057	212775529	rs12564392	0.619048	0.540241	0.666667	ATF3	ENSG00000162772	Karitiana	0.458333	0.328767	0.541667
Maya	chr1:212649295-212811057	212775529	rs12564392	0.619048	0.540241	0.666667	ATF3	ENSG00000162772	MXL	0.25	0.245811	0.28125
Maya	chr1:212649295-212811057	212775529	rs12564392	0.619048	0.540241	0.666667	ATF3	ENSG00000162772	Mongola	0.2	0.305556	0.4
Maya	chr1:212649295-212811057	212775529	rs12564392	0.619048	0.540241	0.666667	ATF3	ENSG00000162772	Naxi	0.222222	0.45873	0.5
Maya	chr1:212649295-212811057	212775529	rs12564392	0.619048	0.540241	0.666667	ATF3	ENSG00000162772	PEL	0.447059	0.421541	0.511765
Maya	chr1:212649295-212811057	212775529	rs12564392	0.619048	0.540241	0.666667	ATF3	ENSG00000162772	Pima	0.392857	0.349207	0.571429
Maya	chr1:212649295-212811057	212775529	rs12564392	0.619048	0.540241	0.666667	ATF3	ENSG00000162772	Surui	0.75	0.75	0.75
Maya	chr1:212649295-212811057	212775529	rs12564392	0.619048	0.540241	0.666667	ATF3	ENSG00000162772	Yakut	0.24	0.272857	0.3
Maya	chr1:212649295-212811057	212785414	rs11571530	0.619048	0.540241	0.666667	ATF3	ENSG00000162772	Colombian	0.642857	0.526157	0.642857
Maya	chr1:212649295-212811057	212785414	rs11571530	0.619048	0.540241	0.666667	ATF3	ENSG00000162772	Karitiana	0.458333	0.328767	0.541667
Maya	chr1:212649295-212811057	212785414	rs11571530	0.619048	0.540241	0.666667	ATF3	ENSG00000162772	MXL	0.25	0.245811	0.28125
Maya	chr1:212649295-212811057	212785414	rs11571530	0.619048	0.540241	0.666667	ATF3	ENSG00000162772	Mongola	0.2	0.305556	0.4
Maya	chr1:212649295-212811057	212785414	rs11571530	0.619048	0.540241	0.666667	ATF3	ENSG00000162772	Naxi	0.222222	0.45873	0.5
Maya	chr1:212649295-212811057	212785414	rs11571530	0.619048	0.540241	0.666667	ATF3	ENSG00000162772	PEL	0.452941	0.421541	0.511765
Maya	chr1:212649295-212811057	212785414	rs11571530	0.619048	0.540241	0.666667	ATF3	ENSG00000162772	Pima	0.464286	0.349207	0.571429
Maya	chr1:212649295-212811057	212785414	rs11571530	0.619048	0.540241	0.666667	ATF3	ENSG00000162772	Surui	0.75	0.75	0.75
Maya	chr1:212649295-212811057	212785414	rs11571530	0.619048	0.540241	0.666667	ATF3	ENSG00000162772	Yakut	0.24	0.272857	0.3
Maya	chr1:212649295-212811057	212788567	rs2229346	0.619048	0.540241	0.666667	ATF3	ENSG00000162772	Colombian	0.642857	0.526157	0.642857
Maya	chr1:212649295-212811057	212788567	rs2229346	0.619048	0.540241	0.666667	ATF3	ENSG00000162772	Karitiana	0.458333	0.328767	0.541667
Maya	chr1:212649295-212811057	212788567	rs2229346	0.619048	0.540241	0.666667	ATF3	ENSG00000162772	MXL	0.25	0.245811	0.28125
Maya	chr1:212649295-212811057	212788567	rs2229346	0.619048	0.540241	0.666667	ATF3	ENSG00000162772	Mongola	0.2	0.305556	0.4
Maya	chr1:212649295-212811057	212788567	rs2229346	0.619048	0.540241	0.666667	ATF3	ENSG00000162772	Naxi	0.222222	0.45873	0.5
Maya	chr1:212649295-212811057	212788567	rs2229346	0.619048	0.540241	0.666667	ATF3	ENSG00000162772	PEL	0.447059	0.421541	0.511765
Maya	chr1:212649295-212811057	212788567	rs2229346	0.619048	0.540241	0.666667	ATF3	ENSG00000162772	Pima	0.464286	0.349207	0.571429
Maya	chr1:212649295-212811057	212788567	rs2229346	0.619048	0.540241	0.666667	ATF3	ENSG00000162772	Surui	0.75	0.75	0.75
Maya	chr1:212649295-212811057	212788567	rs2229346	0.619048	0.540241	0.666667	ATF3	ENSG00000162772	Yakut	0.24	0.272857	0.3
Colombian	chr1:212649295-212811057	212766199	rs1976657	0.642857	0.526157	0.642857	ATF3	ENSG00000162772	CHB	0.218447	0.111005	0.446602
Colombian	chr1:212649295-212811057	212766199	rs1976657	0.642857	0.526157	0.642857	ATF3	ENSG00000162772	CHS	0.204762	0.36853	0.428571
Colombian	chr1:212649295-212811057	212766199	rs1976657	0.642857	0.526157	0.642857	ATF3	ENSG00000162772	CLM	0.201087	0.186358	0.233696
Colombian	chr1:212649295-212811057	212766199	rs1976657	0.642857	0.526157	0.642857	ATF3	ENSG00000162772	Daur	0.222222	0.317938	0.444444
Colombian	chr1:212649295-212811057	212766199	rs1976657	0.642857	0.526157	0.642857	ATF3	ENSG00000162772	Japanese	0.214286	0.233705	0.357143
Colombian	chr1:212649295-212811057	212766199	rs1976657	0.642857	0.526157	0.642857	ATF3	ENSG00000162772	Karitiana	0.458333	0.328767	0.541667
Colombian	chr1:212649295-212811057	212766199	rs1976657	0.642857	0.526157	0.642857	ATF3	ENSG00000162772	MXL	0.257812	0.245811	0.28125
Colombian	chr1:212649295-212811057	212766199	rs1976657	0.642857	0.526157	0.642857	ATF3	ENSG00000162772	Maya	0.666667	0.540241	0.666667
Colombian	chr1:212649295-212811057	212766199	rs1976657	0.642857	0.526157	0.642857	ATF3	ENSG00000162772	Mongola	0.25	0.305556	0.4
Colombian	chr1:212649295-212811057	212766199	rs1976657	0.642857	0.526157	0.642857	ATF3	ENSG00000162772	Naxi	0.277778	0.45873	0.5
Colombian	chr1:212649295-212811057	212766199	rs1976657	0.642857	0.526157	0.642857	ATF3	ENSG00000162772	PEL	0.470588	0.421541	0.511765
Colombian	chr1:212649295-212811057	212766199	rs1976657	0.642857	0.526157	0.642857	ATF3	ENSG00000162772	Pima	0.428571	0.349207	0.571429
Colombian	chr1:212649295-212811057	212766199	rs1976657	0.642857	0.526157	0.642857	ATF3	ENSG00000162772	Surui	0.75	0.75	0.75
Colombian	chr1:212649295-212811057	212766199	rs1976657	0.642857	0.526157	0.642857	ATF3	ENSG00000162772	Yakut	0.28	0.272857	0.3
Colombian	chr1:212649295-212811057	212768599	rs1567709	0.642857	0.526157	0.642857	ATF3	ENSG00000162772	CHB	0.213592	0.111005	0.446602
Colombian	chr1:212649295-212811057	212768599	rs1567709	0.642857	0.526157	0.642857	ATF3	ENSG00000162772	CHS	0.204762	0.36853	0.428571
Colombian	chr1:212649295-212811057	212768599	rs1567709	0.642857	0.526157	0.642857	ATF3	ENSG00000162772	CLM	0.201087	0.186358	0.233696
Colombian	chr1:212649295-212811057	212768599	rs1567709	0.642857	0.526157	0.642857	ATF3	ENSG00000162772	Daur	0.222222	0.317938	0.444444
Colombian	chr1:212649295-212811057	212768599	rs1567709	0.642857	0.526157	0.642857	ATF3	ENSG00000162772	Japanese	0.214286	0.233705	0.357143
Colombian	chr1:212649295-212811057	212768599	rs1567709	0.642857	0.526157	0.642857	ATF3	ENSG00000162772	Karitiana	0.458333	0.328767	0.541667
[truncated: 18,129 more rows]

## Sheet: Vindija
Population	Chromosomal Segment	Position	Variant ID	Archaic Allele Frequency	Average Segment Allele Frequency	Maximum Allele Frequency of Segment	snpEff Gene	snpEff Gene ID	Matching Population	Matching Population Archaic Allele Frequency	Matching Population Average Segment Allele Frequency	Matching Population Maximum Allele Frequency of Segment
[truncated: 20,782 more rows]

[truncated: 1 more sheets: Denisova]
