# Supplementary material for: Archaic Adaptive Introgression in Modern Human Reproductive Genes
Source: Research Square preprint supplement (doi:10.21203/rs.3.rs-5544119/v1), 2025-03-19
Supplement: Supplementary file 6 [file 68d6b0a50c505d0192393e78.xlsx]

## Sheet: README
README: Gene Ontology (GO) data downloaded from BioMart (Harrison et al., 2024). The table is in alphabetical order based on the gene name. Missing data based on the downloaded information will contain a "-" in the column.

## Sheet: Supplemental Table 8
Gene name	Gene stable ID	GO term accession	GO term name	GO term definition	GO term evidence code	GO domain
AC018816.3	ENSG00000235978	-	-	-	-	-
AC018816.3	ENSG00000235978	-	-	-	-	-
ACBD5	ENSG00000107897	GO:0000062	fatty-acyl-CoA binding	Interacting selectively and non-covalently with acyl-CoA, any derivative of coenzyme A in which the sulfhydryl group is in thiolester linkage with a fatty acyl group. [GOC:jl, ISBN:0198506732]	IEA	molecular_function
ACBD5	ENSG00000107897	GO:0005778	peroxisomal membrane	The lipid bilayer surrounding a peroxisome. [GOC:mah]	IEA	cellular_component
ACBD5	ENSG00000107897	GO:0006810	transport	The directed movement of substances (such as macromolecules, small molecules, ions) into, out of or within a cell, or between cells, or within a multicellular organism by means of some agent such as a transporter or pore. [GOC:dph, GOC:jl, GOC:mah]	IEA	biological_process
ACBD5	ENSG00000107897	GO:0008289	lipid binding	Interacting selectively and non-covalently with a lipid. [GOC:ai]	IEA	molecular_function
ACBD5	ENSG00000107897	GO:0043231	intracellular membrane-bounded organelle	Organized structure of distinctive morphology and function, bounded by a single or double lipid bilayer membrane and occurring within the cell. Includes the nucleus, mitochondria, plastids, vacuoles, and vesicles. Excludes the plasma membrane. [GOC:go_curators]	IDA	cellular_component
ACBD5	ENSG00000107897	GO:0008150	biological_process	Any process specifically pertinent to the functioning of integrated living units: cells, tissues, organs, and organisms. A process is a collection of molecular events with a defined beginning and end. [GOC:go_curators, GOC:isa_complete]	ND	biological_process
ACBD5	ENSG00000107897	GO:0003674	molecular_function	Elemental activities, such as catalysis or binding, describing the actions of a gene product at the molecular level. A given gene product may exhibit one or more molecular functions. [GOC:go_curators]	ND	molecular_function
ACBD5	ENSG00000107897	GO:0016021	integral to membrane	Penetrating at least one phospholipid bilayer of a membrane. May also refer to the state of being buried in the bilayer with no exposure outside the bilayer. When used to describe a protein, indicates that all or part of the peptide sequence is embedded in the membrane. [GOC:go_curators]	IEA	cellular_component
ACBD5	ENSG00000107897	GO:0000062	fatty-acyl-CoA binding	Interacting selectively and non-covalently with acyl-CoA, any derivative of coenzyme A in which the sulfhydryl group is in thiolester linkage with a fatty acyl group. [GOC:jl, ISBN:0198506732]	IEA	molecular_function
ACBD5	ENSG00000107897	GO:0005778	peroxisomal membrane	The lipid bilayer surrounding a peroxisome. [GOC:mah]	IEA	cellular_component
ACBD5	ENSG00000107897	GO:0006810	transport	The directed movement of substances (such as macromolecules, small molecules, ions) into, out of or within a cell, or between cells, or within a multicellular organism by means of some agent such as a transporter or pore. [GOC:dph, GOC:jl, GOC:mah]	IEA	biological_process
ACBD5	ENSG00000107897	GO:0008289	lipid binding	Interacting selectively and non-covalently with a lipid. [GOC:ai]	IEA	molecular_function
ACBD5	ENSG00000107897	GO:0043231	intracellular membrane-bounded organelle	Organized structure of distinctive morphology and function, bounded by a single or double lipid bilayer membrane and occurring within the cell. Includes the nucleus, mitochondria, plastids, vacuoles, and vesicles. Excludes the plasma membrane. [GOC:go_curators]	IDA	cellular_component
ACBD5	ENSG00000107897	GO:0008150	biological_process	Any process specifically pertinent to the functioning of integrated living units: cells, tissues, organs, and organisms. A process is a collection of molecular events with a defined beginning and end. [GOC:go_curators, GOC:isa_complete]	ND	biological_process
ACBD5	ENSG00000107897	GO:0003674	molecular_function	Elemental activities, such as catalysis or binding, describing the actions of a gene product at the molecular level. A given gene product may exhibit one or more molecular functions. [GOC:go_curators]	ND	molecular_function
ACBD5	ENSG00000107897	GO:0016021	integral to membrane	Penetrating at least one phospholipid bilayer of a membrane. May also refer to the state of being buried in the bilayer with no exposure outside the bilayer. When used to describe a protein, indicates that all or part of the peptide sequence is embedded in the membrane. [GOC:go_curators]	IEA	cellular_component
ACBD5	ENSG00000107897	GO:0000062	fatty-acyl-CoA binding	Interacting selectively and non-covalently with acyl-CoA, any derivative of coenzyme A in which the sulfhydryl group is in thiolester linkage with a fatty acyl group. [GOC:jl, ISBN:0198506732]	IEA	molecular_function
ACBD5	ENSG00000107897	GO:0005778	peroxisomal membrane	The lipid bilayer surrounding a peroxisome. [GOC:mah]	IEA	cellular_component
ACBD5	ENSG00000107897	GO:0006810	transport	The directed movement of substances (such as macromolecules, small molecules, ions) into, out of or within a cell, or between cells, or within a multicellular organism by means of some agent such as a transporter or pore. [GOC:dph, GOC:jl, GOC:mah]	IEA	biological_process
ACBD5	ENSG00000107897	GO:0008289	lipid binding	Interacting selectively and non-covalently with a lipid. [GOC:ai]	IEA	molecular_function
ACBD5	ENSG00000107897	GO:0043231	intracellular membrane-bounded organelle	Organized structure of distinctive morphology and function, bounded by a single or double lipid bilayer membrane and occurring within the cell. Includes the nucleus, mitochondria, plastids, vacuoles, and vesicles. Excludes the plasma membrane. [GOC:go_curators]	IDA	cellular_component
ACBD5	ENSG00000107897	GO:0008150	biological_process	Any process specifically pertinent to the functioning of integrated living units: cells, tissues, organs, and organisms. A process is a collection of molecular events with a defined beginning and end. [GOC:go_curators, GOC:isa_complete]	ND	biological_process
ACBD5	ENSG00000107897	GO:0003674	molecular_function	Elemental activities, such as catalysis or binding, describing the actions of a gene product at the molecular level. A given gene product may exhibit one or more molecular functions. [GOC:go_curators]	ND	molecular_function
ACBD5	ENSG00000107897	GO:0016021	integral to membrane	Penetrating at least one phospholipid bilayer of a membrane. May also refer to the state of being buried in the bilayer with no exposure outside the bilayer. When used to describe a protein, indicates that all or part of the peptide sequence is embedded in the membrane. [GOC:go_curators]	IEA	cellular_component
ACBD5	ENSG00000107897	GO:0000062	fatty-acyl-CoA binding	Interacting selectively and non-covalently with acyl-CoA, any derivative of coenzyme A in which the sulfhydryl group is in thiolester linkage with a fatty acyl group. [GOC:jl, ISBN:0198506732]	IEA	molecular_function
ACBD5	ENSG00000107897	GO:0005778	peroxisomal membrane	The lipid bilayer surrounding a peroxisome. [GOC:mah]	IEA	cellular_component
ACBD5	ENSG00000107897	GO:0006810	transport	The directed movement of substances (such as macromolecules, small molecules, ions) into, out of or within a cell, or between cells, or within a multicellular organism by means of some agent such as a transporter or pore. [GOC:dph, GOC:jl, GOC:mah]	IEA	biological_process
ACBD5	ENSG00000107897	GO:0008289	lipid binding	Interacting selectively and non-covalently with a lipid. [GOC:ai]	IEA	molecular_function
ACBD5	ENSG00000107897	GO:0043231	intracellular membrane-bounded organelle	Organized structure of distinctive morphology and function, bounded by a single or double lipid bilayer membrane and occurring within the cell. Includes the nucleus, mitochondria, plastids, vacuoles, and vesicles. Excludes the plasma membrane. [GOC:go_curators]	IDA	cellular_component
ACBD5	ENSG00000107897	GO:0008150	biological_process	Any process specifically pertinent to the functioning of integrated living units: cells, tissues, organs, and organisms. A process is a collection of molecular events with a defined beginning and end. [GOC:go_curators, GOC:isa_complete]	ND	biological_process
ACBD5	ENSG00000107897	GO:0003674	molecular_function	Elemental activities, such as catalysis or binding, describing the actions of a gene product at the molecular level. A given gene product may exhibit one or more molecular functions. [GOC:go_curators]	ND	molecular_function
ACBD5	ENSG00000107897	GO:0016021	integral to membrane	Penetrating at least one phospholipid bilayer of a membrane. May also refer to the state of being buried in the bilayer with no exposure outside the bilayer. When used to describe a protein, indicates that all or part of the peptide sequence is embedded in the membrane. [GOC:go_curators]	IEA	cellular_component
ACBD5	ENSG00000107897	GO:0000062	fatty-acyl-CoA binding	Interacting selectively and non-covalently with acyl-CoA, any derivative of coenzyme A in which the sulfhydryl group is in thiolester linkage with a fatty acyl group. [GOC:jl, ISBN:0198506732]	IEA	molecular_function
ACBD5	ENSG00000107897	GO:0000062	fatty-acyl-CoA binding	Interacting selectively and non-covalently with acyl-CoA, any derivative of coenzyme A in which the sulfhydryl group is in thiolester linkage with a fatty acyl group. [GOC:jl, ISBN:0198506732]	IEA	molecular_function
ACBD5	ENSG00000107897	GO:0000062	fatty-acyl-CoA binding	Interacting selectively and non-covalently with acyl-CoA, any derivative of coenzyme A in which the sulfhydryl group is in thiolester linkage with a fatty acyl group. [GOC:jl, ISBN:0198506732]	IEA	molecular_function
ACBD5	ENSG00000107897	GO:0043231	intracellular membrane-bounded organelle	Organized structure of distinctive morphology and function, bounded by a single or double lipid bilayer membrane and occurring within the cell. Includes the nucleus, mitochondria, plastids, vacuoles, and vesicles. Excludes the plasma membrane. [GOC:go_curators]	IDA	cellular_component
AHRR	ENSG00000063438	GO:0033235	positive regulation of protein sumoylation	Any process that activates or increases the frequency, rate or extent of the addition of SUMO groups to a protein. [GOC:mah]	IEA	biological_process
AHRR	ENSG00000063438	GO:0046983	protein dimerization activity	The formation of a protein dimer, a macromolecular structure consists of two noncovalently associated identical or nonidentical subunits. [ISBN:0198506732]	IEA	molecular_function
AHRR	ENSG00000063438	GO:0007165	signal transduction	The cellular process in which a signal is conveyed to trigger a change in the activity or state of a cell. Signal transduction begins with reception of a signal (e.g. a ligand binding to a receptor or receptor activation by a stimulus such as light), or for signal transduction in the absence of ligand, signal-withdrawal or the activity of a constitutively active receptor. Signal transduction ends…	IEA	biological_process
AHRR	ENSG00000063438	GO:0006355	regulation of transcription, DNA-dependent	Any process that modulates the frequency, rate or extent of cellular DNA-dependent transcription. [GOC:go_curators, GOC:txnOH]	IEA	biological_process
AHRR	ENSG00000063438	GO:0004871	signal transducer activity	Conveys a signal across a cell to trigger a change in cell function or state. A signal is a physical entity or change in state that is used to transfer information in order to trigger a response. [GOC:go_curators]	IEA	molecular_function
AHRR	ENSG00000063438	GO:0003677	DNA binding	Any molecular function by which a gene product interacts selectively and non-covalently with DNA (deoxyribonucleic acid). [GOC:dph, GOC:jl, GOC:tb, GOC:vw]	IEA	molecular_function
AHRR	ENSG00000063438	GO:0005737	cytoplasm	All of the contents of a cell excluding the plasma membrane and nucleus, but including other subcellular structures. [ISBN:0198547684]	IEA	cellular_component
AHRR	ENSG00000063438	GO:0006351	transcription, DNA-templated	The cellular synthesis of RNA on a template of DNA. [GOC:jl, GOC:txnOH]	IEA	biological_process
AHRR	ENSG00000063438	GO:0000122	negative regulation of transcription from RNA polymerase II promoter	Any process that stops, prevents, or reduces the frequency, rate or extent of transcription from an RNA polymerase II promoter. [GOC:go_curators, GOC:txnOH]	IEA	biological_process
AHRR	ENSG00000063438	GO:0005634	nucleus	A membrane-bounded organelle of eukaryotic cells in which chromosomes are housed and replicated. In most cells, the nucleus contains all of the cell's chromosomes except the organellar chromosomes, and is the site of RNA synthesis and processing. In some species, or in specialized cell types, RNA metabolism or DNA replication may be absent. [GOC:go_curators]	IEA	cellular_component
AHRR	ENSG00000063438	GO:0033235	positive regulation of protein sumoylation	Any process that activates or increases the frequency, rate or extent of the addition of SUMO groups to a protein. [GOC:mah]	IEA	biological_process
AHRR	ENSG00000063438	GO:0046983	protein dimerization activity	The formation of a protein dimer, a macromolecular structure consists of two noncovalently associated identical or nonidentical subunits. [ISBN:0198506732]	IEA	molecular_function
AHRR	ENSG00000063438	GO:0007165	signal transduction	The cellular process in which a signal is conveyed to trigger a change in the activity or state of a cell. Signal transduction begins with reception of a signal (e.g. a ligand binding to a receptor or receptor activation by a stimulus such as light), or for signal transduction in the absence of ligand, signal-withdrawal or the activity of a constitutively active receptor. Signal transduction ends…	IEA	biological_process
AHRR	ENSG00000063438	GO:0006355	regulation of transcription, DNA-dependent	Any process that modulates the frequency, rate or extent of cellular DNA-dependent transcription. [GOC:go_curators, GOC:txnOH]	IEA	biological_process
AHRR	ENSG00000063438	GO:0004871	signal transducer activity	Conveys a signal across a cell to trigger a change in cell function or state. A signal is a physical entity or change in state that is used to transfer information in order to trigger a response. [GOC:go_curators]	IEA	molecular_function
AHRR	ENSG00000063438	GO:0003677	DNA binding	Any molecular function by which a gene product interacts selectively and non-covalently with DNA (deoxyribonucleic acid). [GOC:dph, GOC:jl, GOC:tb, GOC:vw]	IEA	molecular_function
AHRR	ENSG00000063438	GO:0005737	cytoplasm	All of the contents of a cell excluding the plasma membrane and nucleus, but including other subcellular structures. [ISBN:0198547684]	IEA	cellular_component
AHRR	ENSG00000063438	GO:0006351	transcription, DNA-templated	The cellular synthesis of RNA on a template of DNA. [GOC:jl, GOC:txnOH]	IEA	biological_process
AHRR	ENSG00000063438	GO:0000122	negative regulation of transcription from RNA polymerase II promoter	Any process that stops, prevents, or reduces the frequency, rate or extent of transcription from an RNA polymerase II promoter. [GOC:go_curators, GOC:txnOH]	IEA	biological_process
AHRR	ENSG00000063438	GO:0005634	nucleus	A membrane-bounded organelle of eukaryotic cells in which chromosomes are housed and replicated. In most cells, the nucleus contains all of the cell's chromosomes except the organellar chromosomes, and is the site of RNA synthesis and processing. In some species, or in specialized cell types, RNA metabolism or DNA replication may be absent. [GOC:go_curators]	IEA	cellular_component
AHRR	ENSG00000063438	GO:0045892	negative regulation of transcription, DNA-dependent	Any process that stops, prevents, or reduces the frequency, rate or extent of cellular DNA-dependent transcription. [GOC:go_curators, GOC:txnOH]	IEA	biological_process
AHRR	ENSG00000063438	-	-	-	-	-
AHRR	ENSG00000063438	-	-	-	-	-
AHRR	ENSG00000063438	GO:0033235	positive regulation of protein sumoylation	Any process that activates or increases the frequency, rate or extent of the addition of SUMO groups to a protein. [GOC:mah]	IEA	biological_process
AHRR	ENSG00000063438	GO:0046983	protein dimerization activity	The formation of a protein dimer, a macromolecular structure consists of two noncovalently associated identical or nonidentical subunits. [ISBN:0198506732]	IEA	molecular_function
AHRR	ENSG00000063438	GO:0007165	signal transduction	The cellular process in which a signal is conveyed to trigger a change in the activity or state of a cell. Signal transduction begins with reception of a signal (e.g. a ligand binding to a receptor or receptor activation by a stimulus such as light), or for signal transduction in the absence of ligand, signal-withdrawal or the activity of a constitutively active receptor. Signal transduction ends…	IEA	biological_process
AHRR	ENSG00000063438	GO:0006355	regulation of transcription, DNA-dependent	Any process that modulates the frequency, rate or extent of cellular DNA-dependent transcription. [GOC:go_curators, GOC:txnOH]	IEA	biological_process
AHRR	ENSG00000063438	GO:0004871	signal transducer activity	Conveys a signal across a cell to trigger a change in cell function or state. A signal is a physical entity or change in state that is used to transfer information in order to trigger a response. [GOC:go_curators]	IEA	molecular_function
AHRR	ENSG00000063438	GO:0003677	DNA binding	Any molecular function by which a gene product interacts selectively and non-covalently with DNA (deoxyribonucleic acid). [GOC:dph, GOC:jl, GOC:tb, GOC:vw]	IEA	molecular_function
AHRR	ENSG00000063438	GO:0006351	transcription, DNA-templated	The cellular synthesis of RNA on a template of DNA. [GOC:jl, GOC:txnOH]	IEA	biological_process
AHRR	ENSG00000063438	GO:0000122	negative regulation of transcription from RNA polymerase II promoter	Any process that stops, prevents, or reduces the frequency, rate or extent of transcription from an RNA polymerase II promoter. [GOC:go_curators, GOC:txnOH]	IEA	biological_process
AHRR	ENSG00000063438	GO:0005634	nucleus	A membrane-bounded organelle of eukaryotic cells in which chromosomes are housed and replicated. In most cells, the nucleus contains all of the cell's chromosomes except the organellar chromosomes, and is the site of RNA synthesis and processing. In some species, or in specialized cell types, RNA metabolism or DNA replication may be absent. [GOC:go_curators]	IEA	cellular_component
AHRR	ENSG00000063438	GO:0033235	positive regulation of protein sumoylation	Any process that activates or increases the frequency, rate or extent of the addition of SUMO groups to a protein. [GOC:mah]	IEA	biological_process
AHRR	ENSG00000063438	GO:0046983	protein dimerization activity	The formation of a protein dimer, a macromolecular structure consists of two noncovalently associated identical or nonidentical subunits. [ISBN:0198506732]	IEA	molecular_function
AHRR	ENSG00000063438	GO:0000122	negative regulation of transcription from RNA polymerase II promoter	Any process that stops, prevents, or reduces the frequency, rate or extent of transcription from an RNA polymerase II promoter. [GOC:go_curators, GOC:txnOH]	IEA	biological_process
AHRR	ENSG00000063438	GO:0005634	nucleus	A membrane-bounded organelle of eukaryotic cells in which chromosomes are housed and replicated. In most cells, the nucleus contains all of the cell's chromosomes except the organellar chromosomes, and is the site of RNA synthesis and processing. In some species, or in specialized cell types, RNA metabolism or DNA replication may be absent. [GOC:go_curators]	IEA	cellular_component
AHRR	ENSG00000063438	GO:0033235	positive regulation of protein sumoylation	Any process that activates or increases the frequency, rate or extent of the addition of SUMO groups to a protein. [GOC:mah]	IEA	biological_process
AHRR	ENSG00000063438	GO:0046983	protein dimerization activity	The formation of a protein dimer, a macromolecular structure consists of two noncovalently associated identical or nonidentical subunits. [ISBN:0198506732]	IEA	molecular_function
AHRR	ENSG00000063438	GO:0000122	negative regulation of transcription from RNA polymerase II promoter	Any process that stops, prevents, or reduces the frequency, rate or extent of transcription from an RNA polymerase II promoter. [GOC:go_curators, GOC:txnOH]	IEA	biological_process
AHRR	ENSG00000063438	GO:0005634	nucleus	A membrane-bounded organelle of eukaryotic cells in which chromosomes are housed and replicated. In most cells, the nucleus contains all of the cell's chromosomes except the organellar chromosomes, and is the site of RNA synthesis and processing. In some species, or in specialized cell types, RNA metabolism or DNA replication may be absent. [GOC:go_curators]	IEA	cellular_component
AHRR	ENSG00000063438	-	-	-	-	-
AHRR	ENSG00000063438	-	-	-	-	-
AMPH	ENSG00000078053	GO:0031256	leading edge membrane	The portion of the plasma membrane surrounding the leading edge of a motile cell. [GOC:mah]	IDA	cellular_component
AMPH	ENSG00000078053	GO:0048488	synaptic vesicle endocytosis	An endocytosis process that results in the invagination of the axonal plasma membrane to create a membrane-bounded vesicle. This process takes up excess membrane that would otherwise accumulate at the presynaptic terminal due to fusion of vesicle membranes during neurotransmitter release. The vesicles created may subsequently be used for neurotransmitter storage and release. [GOC:jid, GOC:lmg, GO…	IEA	biological_process
AMPH	ENSG00000078053	GO:0006897	endocytosis	A vesicle-mediated transport process in which cells take up external materials or membrane constituents by the invagination of a small region of the plasma membrane to form a new membrane-bounded vesicle. [GOC:mah, ISBN:0198506732, ISBN:0716731363]	TAS	biological_process
AMPH	ENSG00000078053	GO:0007612	learning	Any process in an organism in which a relatively long-lasting adaptive behavioral change occurs as the result of experience. [ISBN:0582227089, ISBN:0721662544]	IEA	biological_process
AMPH	ENSG00000078053	GO:0007268	synaptic transmission	The process of communication from a neuron to a target (neuron, muscle, or secretory cell) across a synapse. [GOC:jl, MeSH:D009435]	TAS	biological_process
AMPH	ENSG00000078053	GO:0030672	synaptic vesicle membrane	The lipid bilayer surrounding a synaptic vesicle. [GOC:mah]	IEA	cellular_component
AMPH	ENSG00000078053	GO:0015629	actin cytoskeleton	The part of the cytoskeleton (the internal framework of a cell) composed of actin and associated proteins. Includes actin cytoskeleton-associated complexes. [GOC:jl, ISBN:0395825172, ISBN:0815316194]	TAS	cellular_component
AMPH	ENSG00000078053	GO:0008021	synaptic vesicle	A secretory organelle, some 50 nm in diameter, of presynaptic nerve terminals; accumulates in high concentrations of neurotransmitters and is secreted these into the synaptic cleft by fusion with the 'active zone' of the presynaptic plasma membrane. [PMID:10099709]	TAS	cellular_component
AMPH	ENSG00000078053	GO:0005543	phospholipid binding	Interacting selectively and non-covalently with phospholipids, a class of lipids containing phosphoric acid as a mono- or diester. [ISBN:0198506732]	IDA	molecular_function
AMPH	ENSG00000078053	GO:0030054	cell junction	A cellular component that forms a specialized region of connection between two cells or between a cell and the extracellular matrix. At a cell junction, anchoring proteins extend through the plasma membrane to link cytoskeletal proteins in one cell to cytoskeletal proteins in neighboring cells or to proteins in the extracellular matrix. [GOC:mah, http://www.vivo.colostate.edu/hbooks/cmb/cells/pme…	IEA	cellular_component
AMPH	ENSG00000078053	GO:0005737	cytoplasm	All of the contents of a cell excluding the plasma membrane and nucleus, but including other subcellular structures. [ISBN:0198547684]	IEA	cellular_component
AMPH	ENSG00000078053	GO:0005515	protein binding	Interacting selectively and non-covalently with any protein or protein complex (a complex of two or more proteins that may include other nonprotein molecules). [GOC:go_curators]	IPI	molecular_function
AMPH	ENSG00000078053	GO:0031256	leading edge membrane	The portion of the plasma membrane surrounding the leading edge of a motile cell. [GOC:mah]	IDA	cellular_component
AMPH	ENSG00000078053	GO:0048488	synaptic vesicle endocytosis	An endocytosis process that results in the invagination of the axonal plasma membrane to create a membrane-bounded vesicle. This process takes up excess membrane that would otherwise accumulate at the presynaptic terminal due to fusion of vesicle membranes during neurotransmitter release. The vesicles created may subsequently be used for neurotransmitter storage and release. [GOC:jid, GOC:lmg, GO…	IEA	biological_process
AMPH	ENSG00000078053	GO:0006897	endocytosis	A vesicle-mediated transport process in which cells take up external materials or membrane constituents by the invagination of a small region of the plasma membrane to form a new membrane-bounded vesicle. [GOC:mah, ISBN:0198506732, ISBN:0716731363]	TAS	biological_process
AMPH	ENSG00000078053	GO:0007612	learning	Any process in an organism in which a relatively long-lasting adaptive behavioral change occurs as the result of experience. [ISBN:0582227089, ISBN:0721662544]	IEA	biological_process
AMPH	ENSG00000078053	GO:0007268	synaptic transmission	The process of communication from a neuron to a target (neuron, muscle, or secretory cell) across a synapse. [GOC:jl, MeSH:D009435]	TAS	biological_process
AMPH	ENSG00000078053	GO:0030672	synaptic vesicle membrane	The lipid bilayer surrounding a synaptic vesicle. [GOC:mah]	IEA	cellular_component
AMPH	ENSG00000078053	GO:0015629	actin cytoskeleton	The part of the cytoskeleton (the internal framework of a cell) composed of actin and associated proteins. Includes actin cytoskeleton-associated complexes. [GOC:jl, ISBN:0395825172, ISBN:0815316194]	TAS	cellular_component
AMPH	ENSG00000078053	GO:0008021	synaptic vesicle	A secretory organelle, some 50 nm in diameter, of presynaptic nerve terminals; accumulates in high concentrations of neurotransmitters and is secreted these into the synaptic cleft by fusion with the 'active zone' of the presynaptic plasma membrane. [PMID:10099709]	TAS	cellular_component
AMPH	ENSG00000078053	GO:0005543	phospholipid binding	Interacting selectively and non-covalently with phospholipids, a class of lipids containing phosphoric acid as a mono- or diester. [ISBN:0198506732]	IDA	molecular_function
AMPH	ENSG00000078053	GO:0030054	cell junction	A cellular component that forms a specialized region of connection between two cells or between a cell and the extracellular matrix. At a cell junction, anchoring proteins extend through the plasma membrane to link cytoskeletal proteins in one cell to cytoskeletal proteins in neighboring cells or to proteins in the extracellular matrix. [GOC:mah, http://www.vivo.colostate.edu/hbooks/cmb/cells/pme…	IEA	cellular_component
AMPH	ENSG00000078053	GO:0005737	cytoplasm	All of the contents of a cell excluding the plasma membrane and nucleus, but including other subcellular structures. [ISBN:0198547684]	IEA	cellular_component
AMPH	ENSG00000078053	GO:0005515	protein binding	Interacting selectively and non-covalently with any protein or protein complex (a complex of two or more proteins that may include other nonprotein molecules). [GOC:go_curators]	IPI	molecular_function
AMPH	ENSG00000078053	GO:0008021	synaptic vesicle	A secretory organelle, some 50 nm in diameter, of presynaptic nerve terminals; accumulates in high concentrations of neurotransmitters and is secreted these into the synaptic cleft by fusion with the 'active zone' of the presynaptic plasma membrane. [PMID:10099709]	IEA	cellular_component
AMPH	ENSG00000078053	GO:0005515	protein binding	Interacting selectively and non-covalently with any protein or protein complex (a complex of two or more proteins that may include other nonprotein molecules). [GOC:go_curators]	IEA	molecular_function
AMPH	ENSG00000078053	GO:0005515	protein binding	Interacting selectively and non-covalently with any protein or protein complex (a complex of two or more proteins that may include other nonprotein molecules). [GOC:go_curators]	IEA	molecular_function
AMPH	ENSG00000078053	-	-	-	-	-
AMPH	ENSG00000078053	GO:0005737	cytoplasm	All of the contents of a cell excluding the plasma membrane and nucleus, but including other subcellular structures. [ISBN:0198547684]	IEA	cellular_component
AMPH	ENSG00000078053	GO:0005515	protein binding	Interacting selectively and non-covalently with any protein or protein complex (a complex of two or more proteins that may include other nonprotein molecules). [GOC:go_curators]	IEA	molecular_function
ANO5	ENSG00000171714	GO:0034220	ion transmembrane transport	A process in which an ion is transported from one side of a membrane to the other by means of some agent such as a transporter or pore. [GOC:mah]	TAS	biological_process
ANO5	ENSG00000171714	GO:0005622	intracellular	The living contents of a cell; the matter contained within (but not including) the plasma membrane, usually taken to exclude large vacuoles and masses of secretory or ingested material. In eukaryotes it includes the nucleus and cytoplasm. [ISBN:0198506732]	IDA	cellular_component
ANO5	ENSG00000171714	GO:0005789	endoplasmic reticulum membrane	The lipid bilayer surrounding the endoplasmic reticulum. [GOC:mah]	IEA	cellular_component
ANO5	ENSG00000171714	GO:0055085	transmembrane transport	The process in which a solute is transported from one side of a membrane to the other. [GOC:dph, GOC:jid]	TAS	biological_process
ANO5	ENSG00000171714	GO:0005886	plasma membrane	The membrane surrounding a cell that separates the cell from its external environment. It consists of a phospholipid bilayer and associated proteins. [ISBN:0716731363]	TAS	cellular_component
ANO5	ENSG00000171714	GO:0016021	integral to membrane	Penetrating at least one phospholipid bilayer of a membrane. May also refer to the state of being buried in the bilayer with no exposure outside the bilayer. When used to describe a protein, indicates that all or part of the peptide sequence is embedded in the membrane. [GOC:go_curators]	IEA	cellular_component
ANO5	ENSG00000171714	GO:0034220	ion transmembrane transport	A process in which an ion is transported from one side of a membrane to the other by means of some agent such as a transporter or pore. [GOC:mah]	TAS	biological_process
ANO5	ENSG00000171714	GO:0005622	intracellular	The living contents of a cell; the matter contained within (but not including) the plasma membrane, usually taken to exclude large vacuoles and masses of secretory or ingested material. In eukaryotes it includes the nucleus and cytoplasm. [ISBN:0198506732]	IDA	cellular_component
ANO5	ENSG00000171714	GO:0005789	endoplasmic reticulum membrane	The lipid bilayer surrounding the endoplasmic reticulum. [GOC:mah]	IEA	cellular_component
ANO5	ENSG00000171714	GO:0055085	transmembrane transport	The process in which a solute is transported from one side of a membrane to the other. [GOC:dph, GOC:jid]	TAS	biological_process
ANO5	ENSG00000171714	GO:0005886	plasma membrane	The membrane surrounding a cell that separates the cell from its external environment. It consists of a phospholipid bilayer and associated proteins. [ISBN:0716731363]	TAS	cellular_component
ANO5	ENSG00000171714	GO:0016021	integral to membrane	Penetrating at least one phospholipid bilayer of a membrane. May also refer to the state of being buried in the bilayer with no exposure outside the bilayer. When used to describe a protein, indicates that all or part of the peptide sequence is embedded in the membrane. [GOC:go_curators]	IEA	cellular_component
ANO5	ENSG00000171714	GO:0034220	ion transmembrane transport	A process in which an ion is transported from one side of a membrane to the other by means of some agent such as a transporter or pore. [GOC:mah]	TAS	biological_process
ANO5	ENSG00000171714	GO:0005622	intracellular	The living contents of a cell; the matter contained within (but not including) the plasma membrane, usually taken to exclude large vacuoles and masses of secretory or ingested material. In eukaryotes it includes the nucleus and cytoplasm. [ISBN:0198506732]	IDA	cellular_component
ANO5	ENSG00000171714	GO:0005789	endoplasmic reticulum membrane	The lipid bilayer surrounding the endoplasmic reticulum. [GOC:mah]	IEA	cellular_component
ANO5	ENSG00000171714	GO:0055085	transmembrane transport	The process in which a solute is transported from one side of a membrane to the other. [GOC:dph, GOC:jid]	TAS	biological_process
ANO5	ENSG00000171714	GO:0005886	plasma membrane	The membrane surrounding a cell that separates the cell from its external environment. It consists of a phospholipid bilayer and associated proteins. [ISBN:0716731363]	TAS	cellular_component
ANO5	ENSG00000171714	GO:0016021	integral to membrane	Penetrating at least one phospholipid bilayer of a membrane. May also refer to the state of being buried in the bilayer with no exposure outside the bilayer. When used to describe a protein, indicates that all or part of the peptide sequence is embedded in the membrane. [GOC:go_curators]	IEA	cellular_component
ANO5	ENSG00000171714	GO:0034220	ion transmembrane transport	A process in which an ion is transported from one side of a membrane to the other by means of some agent such as a transporter or pore. [GOC:mah]	TAS	biological_process
ANO5	ENSG00000171714	GO:0005622	intracellular	The living contents of a cell; the matter contained within (but not including) the plasma membrane, usually taken to exclude large vacuoles and masses of secretory or ingested material. In eukaryotes it includes the nucleus and cytoplasm. [ISBN:0198506732]	IDA	cellular_component
ANO5	ENSG00000171714	GO:0005789	endoplasmic reticulum membrane	The lipid bilayer surrounding the endoplasmic reticulum. [GOC:mah]	IEA	cellular_component
ANO5	ENSG00000171714	GO:0055085	transmembrane transport	The process in which a solute is transported from one side of a membrane to the other. [GOC:dph, GOC:jid]	TAS	biological_process
ANO5	ENSG00000171714	GO:0005886	plasma membrane	The membrane surrounding a cell that separates the cell from its external environment. It consists of a phospholipid bilayer and associated proteins. [ISBN:0716731363]	TAS	cellular_component
ANO5	ENSG00000171714	GO:0016021	integral to membrane	Penetrating at least one phospholipid bilayer of a membrane. May also refer to the state of being buried in the bilayer with no exposure outside the bilayer. When used to describe a protein, indicates that all or part of the peptide sequence is embedded in the membrane. [GOC:go_curators]	IEA	cellular_component
ANO5	ENSG00000171714	GO:0034220	ion transmembrane transport	A process in which an ion is transported from one side of a membrane to the other by means of some agent such as a transporter or pore. [GOC:mah]	TAS	biological_process
ANO5	ENSG00000171714	GO:0005622	intracellular	The living contents of a cell; the matter contained within (but not including) the plasma membrane, usually taken to exclude large vacuoles and masses of secretory or ingested material. In eukaryotes it includes the nucleus and cytoplasm. [ISBN:0198506732]	IDA	cellular_component
ANO5	ENSG00000171714	GO:0005789	endoplasmic reticulum membrane	The lipid bilayer surrounding the endoplasmic reticulum. [GOC:mah]	IEA	cellular_component
ANO5	ENSG00000171714	GO:0055085	transmembrane transport	The process in which a solute is transported from one side of a membrane to the other. [GOC:dph, GOC:jid]	TAS	biological_process
ANO5	ENSG00000171714	GO:0005886	plasma membrane	The membrane surrounding a cell that separates the cell from its external environment. It consists of a phospholipid bilayer and associated proteins. [ISBN:0716731363]	TAS	cellular_component
ANO5	ENSG00000171714	GO:0016021	integral to membrane	Penetrating at least one phospholipid bilayer of a membrane. May also refer to the state of being buried in the bilayer with no exposure outside the bilayer. When used to describe a protein, indicates that all or part of the peptide sequence is embedded in the membrane. [GOC:go_curators]	IEA	cellular_component
ANO5	ENSG00000171714	GO:0034220	ion transmembrane transport	A process in which an ion is transported from one side of a membrane to the other by means of some agent such as a transporter or pore. [GOC:mah]	TAS	biological_process
ANO5	ENSG00000171714	GO:0005622	intracellular	The living contents of a cell; the matter contained within (but not including) the plasma membrane, usually taken to exclude large vacuoles and masses of secretory or ingested material. In eukaryotes it includes the nucleus and cytoplasm. [ISBN:0198506732]	IDA	cellular_component
ANO5	ENSG00000171714	GO:0005789	endoplasmic reticulum membrane	The lipid bilayer surrounding the endoplasmic reticulum. [GOC:mah]	IEA	cellular_component
ANO5	ENSG00000171714	GO:0055085	transmembrane transport	The process in which a solute is transported from one side of a membrane to the other. [GOC:dph, GOC:jid]	TAS	biological_process
ANO5	ENSG00000171714	GO:0005886	plasma membrane	The membrane surrounding a cell that separates the cell from its external environment. It consists of a phospholipid bilayer and associated proteins. [ISBN:0716731363]	TAS	cellular_component
ANO5	ENSG00000171714	GO:0016021	integral to membrane	Penetrating at least one phospholipid bilayer of a membrane. May also refer to the state of being buried in the bilayer with no exposure outside the bilayer. When used to describe a protein, indicates that all or part of the peptide sequence is embedded in the membrane. [GOC:go_curators]	IEA	cellular_component
ANO5	ENSG00000171714	GO:0034220	ion transmembrane transport	A process in which an ion is transported from one side of a membrane to the other by means of some agent such as a transporter or pore. [GOC:mah]	TAS	biological_process
ANO5	ENSG00000171714	GO:0005622	intracellular	The living contents of a cell; the matter contained within (but not including) the plasma membrane, usually taken to exclude large vacuoles and masses of secretory or ingested material. In eukaryotes it includes the nucleus and cytoplasm. [ISBN:0198506732]	IDA	cellular_component
ANO5	ENSG00000171714	GO:0005789	endoplasmic reticulum membrane	The lipid bilayer surrounding the endoplasmic reticulum. [GOC:mah]	IEA	cellular_component
ANO5	ENSG00000171714	GO:0055085	transmembrane transport	The process in which a solute is transported from one side of a membrane to the other. [GOC:dph, GOC:jid]	TAS	biological_process
ANO5	ENSG00000171714	GO:0005886	plasma membrane	The membrane surrounding a cell that separates the cell from its external environment. It consists of a phospholipid bilayer and associated proteins. [ISBN:0716731363]	TAS	cellular_component
ANO5	ENSG00000171714	GO:0016021	integral to membrane	Penetrating at least one phospholipid bilayer of a membrane. May also refer to the state of being buried in the bilayer with no exposure outside the bilayer. When used to describe a protein, indicates that all or part of the peptide sequence is embedded in the membrane. [GOC:go_curators]	IEA	cellular_component
ANO5	ENSG00000171714	GO:0034220	ion transmembrane transport	A process in which an ion is transported from one side of a membrane to the other by means of some agent such as a transporter or pore. [GOC:mah]	TAS	biological_process
ANO5	ENSG00000171714	GO:0005622	intracellular	The living contents of a cell; the matter contained within (but not including) the plasma membrane, usually taken to exclude large vacuoles and masses of secretory or ingested material. In eukaryotes it includes the nucleus and cytoplasm. [ISBN:0198506732]	IDA	cellular_component
ANO5	ENSG00000171714	GO:0005789	endoplasmic reticulum membrane	The lipid bilayer surrounding the endoplasmic reticulum. [GOC:mah]	IEA	cellular_component
ANO5	ENSG00000171714	GO:0055085	transmembrane transport	The process in which a solute is transported from one side of a membrane to the other. [GOC:dph, GOC:jid]	TAS	biological_process
ANO5	ENSG00000171714	GO:0005886	plasma membrane	The membrane surrounding a cell that separates the cell from its external environment. It consists of a phospholipid bilayer and associated proteins. [ISBN:0716731363]	TAS	cellular_component
ANO5	ENSG00000171714	GO:0016021	integral to membrane	Penetrating at least one phospholipid bilayer of a membrane. May also refer to the state of being buried in the bilayer with no exposure outside the bilayer. When used to describe a protein, indicates that all or part of the peptide sequence is embedded in the membrane. [GOC:go_curators]	IEA	cellular_component
APAF1	ENSG00000120868	GO:0072432	response to G1 DNA damage checkpoint signaling	A process that acts directly to delay or stop progression through the cell cycle in response to signals generated as a result of mitotic cell cycle G1/S transition DNA damage checkpoint signaling; contributes to a mitotic cell cycle G1/S transition DNA damage checkpoint. [GOC:mtg_cell_cycle]	TAS	biological_process
APAF1	ENSG00000120868	GO:0043293	apoptosome	A multisubunit protein complex involved in the signaling phase of the apoptotic process. In mammals it is typically composed of seven Apaf-1 subunits bound to cytochrome c and caspase-9. A similar complex to promote apoptosis is formed from homologous gene products in other eukaryotic organisms. [GOC:mtg_apoptosis, PMID:10428850, PMID:11406413, PMID:12176339, PMID:15189137]	TAS	cellular_component
APAF1	ENSG00000120868	GO:0008635	activation of cysteine-type endopeptidase activity involved in apoptotic process by cytochrome c	Any process that initiates the activity of the inactive enzyme cysteine-type endopeptidase in the context of an apoptotic process and is mediated by cytochrome c. [GOC:dph, GOC:jl, GOC:mtg_apoptosis, GOC:tb, PMID:14744432, Wikipedia:Caspase]	IDA	biological_process
APAF1	ENSG00000120868	GO:0006919	activation of cysteine-type endopeptidase activity involved in apoptotic process	Any process that initiates the activity of the inactive enzyme cysteine-type endopeptidase in the context of an apoptotic process. [GOC:al, GOC:dph, GOC:jl, GOC:mtg_apoptosis, GOC:tb, PMID:14744432, PMID:18328827, Wikipedia:Caspase]	IDA	biological_process
APAF1	ENSG00000120868	GO:0008656	cysteine-type endopeptidase activator activity involved in apoptotic process	Increases the rate of proteolysis catalyzed by a cysteine-type endopeptidase involved in the apoptotic process. [GOC:mah, GOC:mtg_apoptosis]	NAS	molecular_function
APAF1	ENSG00000120868	GO:0006309	apoptotic DNA fragmentation	The cleavage of DNA during apoptosis, which usually occurs in two stages: cleavage into fragments of about 50 kbp followed by cleavage between nucleosomes to yield 200 bp fragments. [GOC:dph, GOC:mah, GOC:mtg_apoptosis, GOC:tb, ISBN:0721639976]	IEA	biological_process
APAF1	ENSG00000120868	GO:0097193	intrinsic apoptotic signaling pathway	A series of molecular signals in which an intracellular signal is conveyed to trigger the apoptotic death of a cell. The pathway starts with reception of an intracellular signal (e.g. DNA damage, endoplasmic reticulum stress, oxidative stress etc.), and ends when the execution phase of apoptosis is triggered. The intrinsic apoptotic signaling pathway is crucially regulated by permeabilization of …	TAS	biological_process
APAF1	ENSG00000120868	GO:0051402	neuron apoptotic process	Any apoptotic process in a neuron, the basic cellular unit of nervous tissue. Each neuron consists of a body, an axon, and dendrites. Their purpose is to receive, conduct, and transmit impulses in the nervous system. [CL:0000540, GOC:mtg_apoptosis, MeSH:A.08.663]	IEA	biological_process
APAF1	ENSG00000120868	GO:0030900	forebrain development	The process whose specific outcome is the progression of the forebrain over time, from its formation to the mature structure. The forebrain is the anterior of the three primary divisions of the developing chordate brain or the corresponding part of the adult brain (in vertebrates, includes especially the cerebral hemispheres, the thalamus, and the hypothalamus and especially in higher vertebrates…	IEA	biological_process
APAF1	ENSG00000120868	GO:0043531	ADP binding	Interacting selectively and non-covalently with ADP, adenosine 5'-diphosphate. [GOC:jl]	IEA	molecular_function
APAF1	ENSG00000120868	GO:0042802	identical protein binding	Interacting selectively and non-covalently with an identical protein or proteins. [GOC:jl]	IEA	molecular_function
APAF1	ENSG00000120868	GO:0007399	nervous system development	The process whose specific outcome is the progression of nervous tissue over time, from its formation to its mature state. [GOC:dgh]	TAS	biological_process
APAF1	ENSG00000120868	GO:0001843	neural tube closure	The last step in the formation of the neural tube, where the paired neural folds are brought together and fuse at the dorsal midline. [GOC:dph, ISBN:0878932437]	IEA	biological_process
APAF1	ENSG00000120868	GO:0006952	defense response	Reactions, triggered in response to the presence of a foreign body or the occurrence of an injury, which result in restriction of damage to the organism attacked or prevention/recovery from the infection caused by the attack. [GOC:go_curators]	IEA	biological_process
APAF1	ENSG00000120868	GO:0043065	positive regulation of apoptotic process	Any process that activates or increases the frequency, rate or extent of cell death by apoptotic process. [GOC:jl, GOC:mtg_apoptosis]	TAS	biological_process
APAF1	ENSG00000120868	GO:0005794	Golgi apparatus	A compound membranous cytoplasmic organelle of eukaryotic cells, consisting of flattened, ribosome-free vesicles arranged in a more or less regular stack. The Golgi apparatus differs from the endoplasmic reticulum in often having slightly thicker membranes, appearing in sections as a characteristic shallow semicircle so that the convex side (cis or entry face) abuts the endoplasmic reticulum, sec…	IDA	cellular_component
APAF1	ENSG00000120868	GO:0005622	intracellular	The living contents of a cell; the matter contained within (but not including) the plasma membrane, usually taken to exclude large vacuoles and masses of secretory or ingested material. In eukaryotes it includes the nucleus and cytoplasm. [ISBN:0198506732]	IEA	cellular_component
APAF1	ENSG00000120868	GO:0042981	regulation of apoptotic process	Any process that modulates the occurrence or rate of cell death by apoptotic process. [GOC:jl, GOC:mtg_apoptosis]	TAS	biological_process
APAF1	ENSG00000120868	GO:0005829	cytosol	The part of the cytoplasm that does not contain organelles but which does contain other particulate matter, such as protein complexes. [GOC:hgd, GOC:jl]	TAS	cellular_component
APAF1	ENSG00000120868	GO:0006915	apoptotic process	A programmed cell death process which begins when a cell receives an internal (e.g. DNA damage) or external signal (e.g. an extracellular death ligand), and proceeds through a series of biochemical events (signaling pathways) which typically lead to rounding-up of the cell, retraction of pseudopodes, reduction of cellular volume (pyknosis), chromatin condensation, nuclear fragmentation (karyorrhe…	TAS	biological_process
APAF1	ENSG00000120868	GO:0005524	ATP binding	Interacting selectively and non-covalently with ATP, adenosine 5'-triphosphate, a universally important coenzyme and enzyme regulator. [ISBN:0198506732]	IEA	molecular_function
APAF1	ENSG00000120868	GO:0005737	cytoplasm	All of the contents of a cell excluding the plasma membrane and nucleus, but including other subcellular structures. [ISBN:0198547684]	IDA	cellular_component
APAF1	ENSG00000120868	GO:0005515	protein binding	Interacting selectively and non-covalently with any protein or protein complex (a complex of two or more proteins that may include other nonprotein molecules). [GOC:go_curators]	IPI	molecular_function
APAF1	ENSG00000120868	GO:0005634	nucleus	A membrane-bounded organelle of eukaryotic cells in which chromosomes are housed and replicated. In most cells, the nucleus contains all of the cell's chromosomes except the organellar chromosomes, and is the site of RNA synthesis and processing. In some species, or in specialized cell types, RNA metabolism or DNA replication may be absent. [GOC:go_curators]	IDA	cellular_component
APAF1	ENSG00000120868	GO:0000166	nucleotide binding	Interacting selectively and non-covalently with a nucleotide, any compound consisting of a nucleoside that is esterified with (ortho)phosphate or an oligophosphate at any hydroxyl group on the ribose or deoxyribose. [GOC:mah, ISBN:0198547684]	TAS	molecular_function
APAF1	ENSG00000120868	GO:0008656	cysteine-type endopeptidase activator activity involved in apoptotic process	Increases the rate of proteolysis catalyzed by a cysteine-type endopeptidase involved in the apoptotic process. [GOC:mah, GOC:mtg_apoptosis]	IEA	molecular_function
APAF1	ENSG00000120868	GO:2001235	positive regulation of apoptotic signaling pathway	Any process that activates or increases the frequency, rate or extent of apoptotic signaling pathway. [GOC:mtg_apoptosis]	IEA	biological_process
APAF1	ENSG00000120868	GO:0006919	activation of cysteine-type endopeptidase activity involved in apoptotic process	Any process that initiates the activity of the inactive enzyme cysteine-type endopeptidase in the context of an apoptotic process. [GOC:al, GOC:dph, GOC:jl, GOC:mtg_apoptosis, GOC:tb, PMID:14744432, PMID:18328827, Wikipedia:Caspase]	IEA	biological_process
APAF1	ENSG00000120868	GO:0007275	multicellular organismal development	The biological process whose specific outcome is the progression of a multicellular organism over time from an initial condition (e.g. a zygote or a young adult) to a later condition (e.g. a multicellular animal or an aged adult). [GOC:dph, GOC:ems, GOC:isa_complete, GOC:tb]	IEA	biological_process
APAF1	ENSG00000120868	GO:0005829	cytosol	The part of the cytoplasm that does not contain organelles but which does contain other particulate matter, such as protein complexes. [GOC:hgd, GOC:jl]	IEA	cellular_component
APAF1	ENSG00000120868	GO:0007420	brain development	The process whose specific outcome is the progression of the brain over time, from its formation to the mature structure. Brain development begins with patterning events in the neural tube and ends with the mature structure that is the center of thought and emotion. The brain is responsible for the coordination and control of bodily activities and the interpretation of information from the senses…	IEA	biological_process
APAF1	ENSG00000120868	GO:0005634	nucleus	A membrane-bounded organelle of eukaryotic cells in which chromosomes are housed and replicated. In most cells, the nucleus contains all of the cell's chromosomes except the organellar chromosomes, and is the site of RNA synthesis and processing. In some species, or in specialized cell types, RNA metabolism or DNA replication may be absent. [GOC:go_curators]	IEA	cellular_component
APAF1	ENSG00000120868	GO:0072432	response to G1 DNA damage checkpoint signaling	A process that acts directly to delay or stop progression through the cell cycle in response to signals generated as a result of mitotic cell cycle G1/S transition DNA damage checkpoint signaling; contributes to a mitotic cell cycle G1/S transition DNA damage checkpoint. [GOC:mtg_cell_cycle]	TAS	biological_process
APAF1	ENSG00000120868	GO:0043293	apoptosome	A multisubunit protein complex involved in the signaling phase of the apoptotic process. In mammals it is typically composed of seven Apaf-1 subunits bound to cytochrome c and caspase-9. A similar complex to promote apoptosis is formed from homologous gene products in other eukaryotic organisms. [GOC:mtg_apoptosis, PMID:10428850, PMID:11406413, PMID:12176339, PMID:15189137]	TAS	cellular_component
APAF1	ENSG00000120868	GO:0008635	activation of cysteine-type endopeptidase activity involved in apoptotic process by cytochrome c	Any process that initiates the activity of the inactive enzyme cysteine-type endopeptidase in the context of an apoptotic process and is mediated by cytochrome c. [GOC:dph, GOC:jl, GOC:mtg_apoptosis, GOC:tb, PMID:14744432, Wikipedia:Caspase]	IDA	biological_process
APAF1	ENSG00000120868	GO:0006919	activation of cysteine-type endopeptidase activity involved in apoptotic process	Any process that initiates the activity of the inactive enzyme cysteine-type endopeptidase in the context of an apoptotic process. [GOC:al, GOC:dph, GOC:jl, GOC:mtg_apoptosis, GOC:tb, PMID:14744432, PMID:18328827, Wikipedia:Caspase]	IDA	biological_process
APAF1	ENSG00000120868	GO:0008656	cysteine-type endopeptidase activator activity involved in apoptotic process	Increases the rate of proteolysis catalyzed by a cysteine-type endopeptidase involved in the apoptotic process. [GOC:mah, GOC:mtg_apoptosis]	NAS	molecular_function
APAF1	ENSG00000120868	GO:0006309	apoptotic DNA fragmentation	The cleavage of DNA during apoptosis, which usually occurs in two stages: cleavage into fragments of about 50 kbp followed by cleavage between nucleosomes to yield 200 bp fragments. [GOC:dph, GOC:mah, GOC:mtg_apoptosis, GOC:tb, ISBN:0721639976]	IEA	biological_process
APAF1	ENSG00000120868	GO:0097193	intrinsic apoptotic signaling pathway	A series of molecular signals in which an intracellular signal is conveyed to trigger the apoptotic death of a cell. The pathway starts with reception of an intracellular signal (e.g. DNA damage, endoplasmic reticulum stress, oxidative stress etc.), and ends when the execution phase of apoptosis is triggered. The intrinsic apoptotic signaling pathway is crucially regulated by permeabilization of …	TAS	biological_process
APAF1	ENSG00000120868	GO:0051402	neuron apoptotic process	Any apoptotic process in a neuron, the basic cellular unit of nervous tissue. Each neuron consists of a body, an axon, and dendrites. Their purpose is to receive, conduct, and transmit impulses in the nervous system. [CL:0000540, GOC:mtg_apoptosis, MeSH:A.08.663]	IEA	biological_process
APAF1	ENSG00000120868	GO:0030900	forebrain development	The process whose specific outcome is the progression of the forebrain over time, from its formation to the mature structure. The forebrain is the anterior of the three primary divisions of the developing chordate brain or the corresponding part of the adult brain (in vertebrates, includes especially the cerebral hemispheres, the thalamus, and the hypothalamus and especially in higher vertebrates…	IEA	biological_process
APAF1	ENSG00000120868	GO:0043531	ADP binding	Interacting selectively and non-covalently with ADP, adenosine 5'-diphosphate. [GOC:jl]	IEA	molecular_function
APAF1	ENSG00000120868	GO:0042802	identical protein binding	Interacting selectively and non-covalently with an identical protein or proteins. [GOC:jl]	IEA	molecular_function
APAF1	ENSG00000120868	GO:0007399	nervous system development	The process whose specific outcome is the progression of nervous tissue over time, from its formation to its mature state. [GOC:dgh]	TAS	biological_process
APAF1	ENSG00000120868	GO:0001843	neural tube closure	The last step in the formation of the neural tube, where the paired neural folds are brought together and fuse at the dorsal midline. [GOC:dph, ISBN:0878932437]	IEA	biological_process
APAF1	ENSG00000120868	GO:0006952	defense response	Reactions, triggered in response to the presence of a foreign body or the occurrence of an injury, which result in restriction of damage to the organism attacked or prevention/recovery from the infection caused by the attack. [GOC:go_curators]	IEA	biological_process
APAF1	ENSG00000120868	GO:0043065	positive regulation of apoptotic process	Any process that activates or increases the frequency, rate or extent of cell death by apoptotic process. [GOC:jl, GOC:mtg_apoptosis]	TAS	biological_process
APAF1	ENSG00000120868	GO:0005794	Golgi apparatus	A compound membranous cytoplasmic organelle of eukaryotic cells, consisting of flattened, ribosome-free vesicles arranged in a more or less regular stack. The Golgi apparatus differs from the endoplasmic reticulum in often having slightly thicker membranes, appearing in sections as a characteristic shallow semicircle so that the convex side (cis or entry face) abuts the endoplasmic reticulum, sec…	IDA	cellular_component
APAF1	ENSG00000120868	GO:0005622	intracellular	The living contents of a cell; the matter contained within (but not including) the plasma membrane, usually taken to exclude large vacuoles and masses of secretory or ingested material. In eukaryotes it includes the nucleus and cytoplasm. [ISBN:0198506732]	IEA	cellular_component
APAF1	ENSG00000120868	GO:0042981	regulation of apoptotic process	Any process that modulates the occurrence or rate of cell death by apoptotic process. [GOC:jl, GOC:mtg_apoptosis]	TAS	biological_process
APAF1	ENSG00000120868	GO:0005829	cytosol	The part of the cytoplasm that does not contain organelles but which does contain other particulate matter, such as protein complexes. [GOC:hgd, GOC:jl]	TAS	cellular_component
APAF1	ENSG00000120868	GO:0006915	apoptotic process	A programmed cell death process which begins when a cell receives an internal (e.g. DNA damage) or external signal (e.g. an extracellular death ligand), and proceeds through a series of biochemical events (signaling pathways) which typically lead to rounding-up of the cell, retraction of pseudopodes, reduction of cellular volume (pyknosis), chromatin condensation, nuclear fragmentation (karyorrhe…	TAS	biological_process
APAF1	ENSG00000120868	GO:0005524	ATP binding	Interacting selectively and non-covalently with ATP, adenosine 5'-triphosphate, a universally important coenzyme and enzyme regulator. [ISBN:0198506732]	IEA	molecular_function
APAF1	ENSG00000120868	GO:0005737	cytoplasm	All of the contents of a cell excluding the plasma membrane and nucleus, but including other subcellular structures. [ISBN:0198547684]	IDA	cellular_component
APAF1	ENSG00000120868	GO:0005515	protein binding	Interacting selectively and non-covalently with any protein or protein complex (a complex of two or more proteins that may include other nonprotein molecules). [GOC:go_curators]	IPI	molecular_function
APAF1	ENSG00000120868	GO:0005634	nucleus	A membrane-bounded organelle of eukaryotic cells in which chromosomes are housed and replicated. In most cells, the nucleus contains all of the cell's chromosomes except the organellar chromosomes, and is the site of RNA synthesis and processing. In some species, or in specialized cell types, RNA metabolism or DNA replication may be absent. [GOC:go_curators]	IDA	cellular_component
APAF1	ENSG00000120868	GO:0000166	nucleotide binding	Interacting selectively and non-covalently with a nucleotide, any compound consisting of a nucleoside that is esterified with (ortho)phosphate or an oligophosphate at any hydroxyl group on the ribose or deoxyribose. [GOC:mah, ISBN:0198547684]	TAS	molecular_function
APAF1	ENSG00000120868	GO:0005622	intracellular	The living contents of a cell; the matter contained within (but not including) the plasma membrane, usually taken to exclude large vacuoles and masses of secretory or ingested material. In eukaryotes it includes the nucleus and cytoplasm. [ISBN:0198506732]	IEA	cellular_component
APAF1	ENSG00000120868	GO:0042981	regulation of apoptotic process	Any process that modulates the occurrence or rate of cell death by apoptotic process. [GOC:jl, GOC:mtg_apoptosis]	IEA	biological_process
APAF1	ENSG00000120868	GO:0005515	protein binding	Interacting selectively and non-covalently with any protein or protein complex (a complex of two or more proteins that may include other nonprotein molecules). [GOC:go_curators]	IEA	molecular_function
APAF1	ENSG00000120868	GO:0072432	response to G1 DNA damage checkpoint signaling	A process that acts directly to delay or stop progression through the cell cycle in response to signals generated as a result of mitotic cell cycle G1/S transition DNA damage checkpoint signaling; contributes to a mitotic cell cycle G1/S transition DNA damage checkpoint. [GOC:mtg_cell_cycle]	TAS	biological_process
APAF1	ENSG00000120868	GO:0043293	apoptosome	A multisubunit protein complex involved in the signaling phase of the apoptotic process. In mammals it is typically composed of seven Apaf-1 subunits bound to cytochrome c and caspase-9. A similar complex to promote apoptosis is formed from homologous gene products in other eukaryotic organisms. [GOC:mtg_apoptosis, PMID:10428850, PMID:11406413, PMID:12176339, PMID:15189137]	TAS	cellular_component
APAF1	ENSG00000120868	GO:0008635	activation of cysteine-type endopeptidase activity involved in apoptotic process by cytochrome c	Any process that initiates the activity of the inactive enzyme cysteine-type endopeptidase in the context of an apoptotic process and is mediated by cytochrome c. [GOC:dph, GOC:jl, GOC:mtg_apoptosis, GOC:tb, PMID:14744432, Wikipedia:Caspase]	IDA	biological_process
APAF1	ENSG00000120868	GO:0006919	activation of cysteine-type endopeptidase activity involved in apoptotic process	Any process that initiates the activity of the inactive enzyme cysteine-type endopeptidase in the context of an apoptotic process. [GOC:al, GOC:dph, GOC:jl, GOC:mtg_apoptosis, GOC:tb, PMID:14744432, PMID:18328827, Wikipedia:Caspase]	IDA	biological_process
APAF1	ENSG00000120868	GO:0008656	cysteine-type endopeptidase activator activity involved in apoptotic process	Increases the rate of proteolysis catalyzed by a cysteine-type endopeptidase involved in the apoptotic process. [GOC:mah, GOC:mtg_apoptosis]	NAS	molecular_function
APAF1	ENSG00000120868	GO:0006309	apoptotic DNA fragmentation	The cleavage of DNA during apoptosis, which usually occurs in two stages: cleavage into fragments of about 50 kbp followed by cleavage between nucleosomes to yield 200 bp fragments. [GOC:dph, GOC:mah, GOC:mtg_apoptosis, GOC:tb, ISBN:0721639976]	IEA	biological_process
APAF1	ENSG00000120868	GO:0097193	intrinsic apoptotic signaling pathway	A series of molecular signals in which an intracellular signal is conveyed to trigger the apoptotic death of a cell. The pathway starts with reception of an intracellular signal (e.g. DNA damage, endoplasmic reticulum stress, oxidative stress etc.), and ends when the execution phase of apoptosis is triggered. The intrinsic apoptotic signaling pathway is crucially regulated by permeabilization of …	TAS	biological_process
APAF1	ENSG00000120868	GO:0051402	neuron apoptotic process	Any apoptotic process in a neuron, the basic cellular unit of nervous tissue. Each neuron consists of a body, an axon, and dendrites. Their purpose is to receive, conduct, and transmit impulses in the nervous system. [CL:0000540, GOC:mtg_apoptosis, MeSH:A.08.663]	IEA	biological_process
APAF1	ENSG00000120868	GO:0030900	forebrain development	The process whose specific outcome is the progression of the forebrain over time, from its formation to the mature structure. The forebrain is the anterior of the three primary divisions of the developing chordate brain or the corresponding part of the adult brain (in vertebrates, includes especially the cerebral hemispheres, the thalamus, and the hypothalamus and especially in higher vertebrates…	IEA	biological_process
APAF1	ENSG00000120868	GO:0043531	ADP binding	Interacting selectively and non-covalently with ADP, adenosine 5'-diphosphate. [GOC:jl]	IEA	molecular_function
APAF1	ENSG00000120868	GO:0042802	identical protein binding	Interacting selectively and non-covalently with an identical protein or proteins. [GOC:jl]	IEA	molecular_function
APAF1	ENSG00000120868	GO:0007399	nervous system development	The process whose specific outcome is the progression of nervous tissue over time, from its formation to its mature state. [GOC:dgh]	TAS	biological_process
APAF1	ENSG00000120868	GO:0001843	neural tube closure	The last step in the formation of the neural tube, where the paired neural folds are brought together and fuse at the dorsal midline. [GOC:dph, ISBN:0878932437]	IEA	biological_process
APAF1	ENSG00000120868	GO:0006952	defense response	Reactions, triggered in response to the presence of a foreign body or the occurrence of an injury, which result in restriction of damage to the organism attacked or prevention/recovery from the infection caused by the attack. [GOC:go_curators]	IEA	biological_process
APAF1	ENSG00000120868	GO:0043065	positive regulation of apoptotic process	Any process that activates or increases the frequency, rate or extent of cell death by apoptotic process. [GOC:jl, GOC:mtg_apoptosis]	TAS	biological_process
APAF1	ENSG00000120868	GO:0005794	Golgi apparatus	A compound membranous cytoplasmic organelle of eukaryotic cells, consisting of flattened, ribosome-free vesicles arranged in a more or less regular stack. The Golgi apparatus differs from the endoplasmic reticulum in often having slightly thicker membranes, appearing in sections as a characteristic shallow semicircle so that the convex side (cis or entry face) abuts the endoplasmic reticulum, sec…	IDA	cellular_component
APAF1	ENSG00000120868	GO:0005622	intracellular	The living contents of a cell; the matter contained within (but not including) the plasma membrane, usually taken to exclude large vacuoles and masses of secretory or ingested material. In eukaryotes it includes the nucleus and cytoplasm. [ISBN:0198506732]	IEA	cellular_component
APAF1	ENSG00000120868	GO:0042981	regulation of apoptotic process	Any process that modulates the occurrence or rate of cell death by apoptotic process. [GOC:jl, GOC:mtg_apoptosis]	TAS	biological_process
APAF1	ENSG00000120868	GO:0005829	cytosol	The part of the cytoplasm that does not contain organelles but which does contain other particulate matter, such as protein complexes. [GOC:hgd, GOC:jl]	TAS	cellular_component
APAF1	ENSG00000120868	GO:0006915	apoptotic process	A programmed cell death process which begins when a cell receives an internal (e.g. DNA damage) or external signal (e.g. an extracellular death ligand), and proceeds through a series of biochemical events (signaling pathways) which typically lead to rounding-up of the cell, retraction of pseudopodes, reduction of cellular volume (pyknosis), chromatin condensation, nuclear fragmentation (karyorrhe…	TAS	biological_process
APAF1	ENSG00000120868	GO:0005524	ATP binding	Interacting selectively and non-covalently with ATP, adenosine 5'-triphosphate, a universally important coenzyme and enzyme regulator. [ISBN:0198506732]	IEA	molecular_function
APAF1	ENSG00000120868	GO:0005737	cytoplasm	All of the contents of a cell excluding the plasma membrane and nucleus, but including other subcellular structures. [ISBN:0198547684]	IDA	cellular_component
APAF1	ENSG00000120868	GO:0005515	protein binding	Interacting selectively and non-covalently with any protein or protein complex (a complex of two or more proteins that may include other nonprotein molecules). [GOC:go_curators]	IPI	molecular_function
APAF1	ENSG00000120868	GO:0005634	nucleus	A membrane-bounded organelle of eukaryotic cells in which chromosomes are housed and replicated. In most cells, the nucleus contains all of the cell's chromosomes except the organellar chromosomes, and is the site of RNA synthesis and processing. In some species, or in specialized cell types, RNA metabolism or DNA replication may be absent. [GOC:go_curators]	IDA	cellular_component
APAF1	ENSG00000120868	GO:0000166	nucleotide binding	Interacting selectively and non-covalently with a nucleotide, any compound consisting of a nucleoside that is esterified with (ortho)phosphate or an oligophosphate at any hydroxyl group on the ribose or deoxyribose. [GOC:mah, ISBN:0198547684]	TAS	molecular_function
APAF1	ENSG00000120868	GO:0072432	response to G1 DNA damage checkpoint signaling	A process that acts directly to delay or stop progression through the cell cycle in response to signals generated as a result of mitotic cell cycle G1/S transition DNA damage checkpoint signaling; contributes to a mitotic cell cycle G1/S transition DNA damage checkpoint. [GOC:mtg_cell_cycle]	TAS	biological_process
APAF1	ENSG00000120868	GO:0043293	apoptosome	A multisubunit protein complex involved in the signaling phase of the apoptotic process. In mammals it is typically composed of seven Apaf-1 subunits bound to cytochrome c and caspase-9. A similar complex to promote apoptosis is formed from homologous gene products in other eukaryotic organisms. [GOC:mtg_apoptosis, PMID:10428850, PMID:11406413, PMID:12176339, PMID:15189137]	TAS	cellular_component
APAF1	ENSG00000120868	GO:0008635	activation of cysteine-type endopeptidase activity involved in apoptotic process by cytochrome c	Any process that initiates the activity of the inactive enzyme cysteine-type endopeptidase in the context of an apoptotic process and is mediated by cytochrome c. [GOC:dph, GOC:jl, GOC:mtg_apoptosis, GOC:tb, PMID:14744432, Wikipedia:Caspase]	IDA	biological_process
APAF1	ENSG00000120868	GO:0006919	activation of cysteine-type endopeptidase activity involved in apoptotic process	Any process that initiates the activity of the inactive enzyme cysteine-type endopeptidase in the context of an apoptotic process. [GOC:al, GOC:dph, GOC:jl, GOC:mtg_apoptosis, GOC:tb, PMID:14744432, PMID:18328827, Wikipedia:Caspase]	IDA	biological_process
APAF1	ENSG00000120868	GO:0008656	cysteine-type endopeptidase activator activity involved in apoptotic process	Increases the rate of proteolysis catalyzed by a cysteine-type endopeptidase involved in the apoptotic process. [GOC:mah, GOC:mtg_apoptosis]	NAS	molecular_function
APAF1	ENSG00000120868	GO:0006309	apoptotic DNA fragmentation	The cleavage of DNA during apoptosis, which usually occurs in two stages: cleavage into fragments of about 50 kbp followed by cleavage between nucleosomes to yield 200 bp fragments. [GOC:dph, GOC:mah, GOC:mtg_apoptosis, GOC:tb, ISBN:0721639976]	IEA	biological_process
APAF1	ENSG00000120868	GO:0097193	intrinsic apoptotic signaling pathway	A series of molecular signals in which an intracellular signal is conveyed to trigger the apoptotic death of a cell. The pathway starts with reception of an intracellular signal (e.g. DNA damage, endoplasmic reticulum stress, oxidative stress etc.), and ends when the execution phase of apoptosis is triggered. The intrinsic apoptotic signaling pathway is crucially regulated by permeabilization of …	TAS	biological_process
APAF1	ENSG00000120868	GO:0051402	neuron apoptotic process	Any apoptotic process in a neuron, the basic cellular unit of nervous tissue. Each neuron consists of a body, an axon, and dendrites. Their purpose is to receive, conduct, and transmit impulses in the nervous system. [CL:0000540, GOC:mtg_apoptosis, MeSH:A.08.663]	IEA	biological_process
APAF1	ENSG00000120868	GO:0030900	forebrain development	The process whose specific outcome is the progression of the forebrain over time, from its formation to the mature structure. The forebrain is the anterior of the three primary divisions of the developing chordate brain or the corresponding part of the adult brain (in vertebrates, includes especially the cerebral hemispheres, the thalamus, and the hypothalamus and especially in higher vertebrates…	IEA	biological_process
APAF1	ENSG00000120868	GO:0043531	ADP binding	Interacting selectively and non-covalently with ADP, adenosine 5'-diphosphate. [GOC:jl]	IEA	molecular_function
APAF1	ENSG00000120868	GO:0042802	identical protein binding	Interacting selectively and non-covalently with an identical protein or proteins. [GOC:jl]	IEA	molecular_function
APAF1	ENSG00000120868	GO:0007399	nervous system development	The process whose specific outcome is the progression of nervous tissue over time, from its formation to its mature state. [GOC:dgh]	TAS	biological_process
APAF1	ENSG00000120868	GO:0001843	neural tube closure	The last step in the formation of the neural tube, where the paired neural folds are brought together and fuse at the dorsal midline. [GOC:dph, ISBN:0878932437]	IEA	biological_process
APAF1	ENSG00000120868	GO:0006952	defense response	Reactions, triggered in response to the presence of a foreign body or the occurrence of an injury, which result in restriction of damage to the organism attacked or prevention/recovery from the infection caused by the attack. [GOC:go_curators]	IEA	biological_process
APAF1	ENSG00000120868	GO:0043065	positive regulation of apoptotic process	Any process that activates or increases the frequency, rate or extent of cell death by apoptotic process. [GOC:jl, GOC:mtg_apoptosis]	TAS	biological_process
APAF1	ENSG00000120868	GO:0005794	Golgi apparatus	A compound membranous cytoplasmic organelle of eukaryotic cells, consisting of flattened, ribosome-free vesicles arranged in a more or less regular stack. The Golgi apparatus differs from the endoplasmic reticulum in often having slightly thicker membranes, appearing in sections as a characteristic shallow semicircle so that the convex side (cis or entry face) abuts the endoplasmic reticulum, sec…	IDA	cellular_component
APAF1	ENSG00000120868	GO:0005622	intracellular	The living contents of a cell; the matter contained within (but not including) the plasma membrane, usually taken to exclude large vacuoles and masses of secretory or ingested material. In eukaryotes it includes the nucleus and cytoplasm. [ISBN:0198506732]	IEA	cellular_component
APAF1	ENSG00000120868	GO:0042981	regulation of apoptotic process	Any process that modulates the occurrence or rate of cell death by apoptotic process. [GOC:jl, GOC:mtg_apoptosis]	TAS	biological_process
APAF1	ENSG00000120868	GO:0005829	cytosol	The part of the cytoplasm that does not contain organelles but which does contain other particulate matter, such as protein complexes. [GOC:hgd, GOC:jl]	TAS	cellular_component
APAF1	ENSG00000120868	GO:0006915	apoptotic process	A programmed cell death process which begins when a cell receives an internal (e.g. DNA damage) or external signal (e.g. an extracellular death ligand), and proceeds through a series of biochemical events (signaling pathways) which typically lead to rounding-up of the cell, retraction of pseudopodes, reduction of cellular volume (pyknosis), chromatin condensation, nuclear fragmentation (karyorrhe…	TAS	biological_process
APAF1	ENSG00000120868	GO:0005524	ATP binding	Interacting selectively and non-covalently with ATP, adenosine 5'-triphosphate, a universally important coenzyme and enzyme regulator. [ISBN:0198506732]	IEA	molecular_function
APAF1	ENSG00000120868	GO:0005737	cytoplasm	All of the contents of a cell excluding the plasma membrane and nucleus, but including other subcellular structures. [ISBN:0198547684]	IDA	cellular_component
APAF1	ENSG00000120868	GO:0005515	protein binding	Interacting selectively and non-covalently with any protein or protein complex (a complex of two or more proteins that may include other nonprotein molecules). [GOC:go_curators]	IPI	molecular_function
APAF1	ENSG00000120868	GO:0005634	nucleus	A membrane-bounded organelle of eukaryotic cells in which chromosomes are housed and replicated. In most cells, the nucleus contains all of the cell's chromosomes except the organellar chromosomes, and is the site of RNA synthesis and processing. In some species, or in specialized cell types, RNA metabolism or DNA replication may be absent. [GOC:go_curators]	IDA	cellular_component
APAF1	ENSG00000120868	GO:0000166	nucleotide binding	Interacting selectively and non-covalently with a nucleotide, any compound consisting of a nucleoside that is esterified with (ortho)phosphate or an oligophosphate at any hydroxyl group on the ribose or deoxyribose. [GOC:mah, ISBN:0198547684]	TAS	molecular_function
APAF1	ENSG00000120868	GO:0072432	response to G1 DNA damage checkpoint signaling	A process that acts directly to delay or stop progression through the cell cycle in response to signals generated as a result of mitotic cell cycle G1/S transition DNA damage checkpoint signaling; contributes to a mitotic cell cycle G1/S transition DNA damage checkpoint. [GOC:mtg_cell_cycle]	TAS	biological_process
APAF1	ENSG00000120868	GO:0043293	apoptosome	A multisubunit protein complex involved in the signaling phase of the apoptotic process. In mammals it is typically composed of seven Apaf-1 subunits bound to cytochrome c and caspase-9. A similar complex to promote apoptosis is formed from homologous gene products in other eukaryotic organisms. [GOC:mtg_apoptosis, PMID:10428850, PMID:11406413, PMID:12176339, PMID:15189137]	TAS	cellular_component
APAF1	ENSG00000120868	GO:0008635	activation of cysteine-type endopeptidase activity involved in apoptotic process by cytochrome c	Any process that initiates the activity of the inactive enzyme cysteine-type endopeptidase in the context of an apoptotic process and is mediated by cytochrome c. [GOC:dph, GOC:jl, GOC:mtg_apoptosis, GOC:tb, PMID:14744432, Wikipedia:Caspase]	IDA	biological_process
APAF1	ENSG00000120868	GO:0006919	activation of cysteine-type endopeptidase activity involved in apoptotic process	Any process that initiates the activity of the inactive enzyme cysteine-type endopeptidase in the context of an apoptotic process. [GOC:al, GOC:dph, GOC:jl, GOC:mtg_apoptosis, GOC:tb, PMID:14744432, PMID:18328827, Wikipedia:Caspase]	IDA	biological_process
APAF1	ENSG00000120868	GO:0008656	cysteine-type endopeptidase activator activity involved in apoptotic process	Increases the rate of proteolysis catalyzed by a cysteine-type endopeptidase involved in the apoptotic process. [GOC:mah, GOC:mtg_apoptosis]	NAS	molecular_function
APAF1	ENSG00000120868	GO:0006309	apoptotic DNA fragmentation	The cleavage of DNA during apoptosis, which usually occurs in two stages: cleavage into fragments of about 50 kbp followed by cleavage between nucleosomes to yield 200 bp fragments. [GOC:dph, GOC:mah, GOC:mtg_apoptosis, GOC:tb, ISBN:0721639976]	IEA	biological_process
APAF1	ENSG00000120868	GO:0097193	intrinsic apoptotic signaling pathway	A series of molecular signals in which an intracellular signal is conveyed to trigger the apoptotic death of a cell. The pathway starts with reception of an intracellular signal (e.g. DNA damage, endoplasmic reticulum stress, oxidative stress etc.), and ends when the execution phase of apoptosis is triggered. The intrinsic apoptotic signaling pathway is crucially regulated by permeabilization of …	TAS	biological_process
APAF1	ENSG00000120868	GO:0051402	neuron apoptotic process	Any apoptotic process in a neuron, the basic cellular unit of nervous tissue. Each neuron consists of a body, an axon, and dendrites. Their purpose is to receive, conduct, and transmit impulses in the nervous system. [CL:0000540, GOC:mtg_apoptosis, MeSH:A.08.663]	IEA	biological_process
APAF1	ENSG00000120868	GO:0030900	forebrain development	The process whose specific outcome is the progression of the forebrain over time, from its formation to the mature structure. The forebrain is the anterior of the three primary divisions of the developing chordate brain or the corresponding part of the adult brain (in vertebrates, includes especially the cerebral hemispheres, the thalamus, and the hypothalamus and especially in higher vertebrates…	IEA	biological_process
APAF1	ENSG00000120868	GO:0043531	ADP binding	Interacting selectively and non-covalently with ADP, adenosine 5'-diphosphate. [GOC:jl]	IEA	molecular_function
APAF1	ENSG00000120868	GO:0042802	identical protein binding	Interacting selectively and non-covalently with an identical protein or proteins. [GOC:jl]	IEA	molecular_function
APAF1	ENSG00000120868	GO:0007399	nervous system development	The process whose specific outcome is the progression of nervous tissue over time, from its formation to its mature state. [GOC:dgh]	TAS	biological_process
APAF1	ENSG00000120868	GO:0001843	neural tube closure	The last step in the formation of the neural tube, where the paired neural folds are brought together and fuse at the dorsal midline. [GOC:dph, ISBN:0878932437]	IEA	biological_process
APAF1	ENSG00000120868	GO:0006952	defense response	Reactions, triggered in response to the presence of a foreign body or the occurrence of an injury, which result in restriction of damage to the organism attacked or prevention/recovery from the infection caused by the attack. [GOC:go_curators]	IEA	biological_process
APAF1	ENSG00000120868	GO:0043065	positive regulation of apoptotic process	Any process that activates or increases the frequency, rate or extent of cell death by apoptotic process. [GOC:jl, GOC:mtg_apoptosis]	TAS	biological_process
APAF1	ENSG00000120868	GO:0005794	Golgi apparatus	A compound membranous cytoplasmic organelle of eukaryotic cells, consisting of flattened, ribosome-free vesicles arranged in a more or less regular stack. The Golgi apparatus differs from the endoplasmic reticulum in often having slightly thicker membranes, appearing in sections as a characteristic shallow semicircle so that the convex side (cis or entry face) abuts the endoplasmic reticulum, sec…	IDA	cellular_component
APAF1	ENSG00000120868	GO:0005622	intracellular	The living contents of a cell; the matter contained within (but not including) the plasma membrane, usually taken to exclude large vacuoles and masses of secretory or ingested material. In eukaryotes it includes the nucleus and cytoplasm. [ISBN:0198506732]	IEA	cellular_component
APAF1	ENSG00000120868	GO:0042981	regulation of apoptotic process	Any process that modulates the occurrence or rate of cell death by apoptotic process. [GOC:jl, GOC:mtg_apoptosis]	TAS	biological_process
APAF1	ENSG00000120868	GO:0005829	cytosol	The part of the cytoplasm that does not contain organelles but which does contain other particulate matter, such as protein complexes. [GOC:hgd, GOC:jl]	TAS	cellular_component
APAF1	ENSG00000120868	GO:0006915	apoptotic process	A programmed cell death process which begins when a cell receives an internal (e.g. DNA damage) or external signal (e.g. an extracellular death ligand), and proceeds through a series of biochemical events (signaling pathways) which typically lead to rounding-up of the cell, retraction of pseudopodes, reduction of cellular volume (pyknosis), chromatin condensation, nuclear fragmentation (karyorrhe…	TAS	biological_process
APAF1	ENSG00000120868	GO:0005524	ATP binding	Interacting selectively and non-covalently with ATP, adenosine 5'-triphosphate, a universally important coenzyme and enzyme regulator. [ISBN:0198506732]	IEA	molecular_function
APAF1	ENSG00000120868	GO:0005737	cytoplasm	All of the contents of a cell excluding the plasma membrane and nucleus, but including other subcellular structures. [ISBN:0198547684]	IDA	cellular_component
APAF1	ENSG00000120868	GO:0005515	protein binding	Interacting selectively and non-covalently with any protein or protein complex (a complex of two or more proteins that may include other nonprotein molecules). [GOC:go_curators]	IPI	molecular_function
APAF1	ENSG00000120868	GO:0005634	nucleus	A membrane-bounded organelle of eukaryotic cells in which chromosomes are housed and replicated. In most cells, the nucleus contains all of the cell's chromosomes except the organellar chromosomes, and is the site of RNA synthesis and processing. In some species, or in specialized cell types, RNA metabolism or DNA replication may be absent. [GOC:go_curators]	IDA	cellular_component
APAF1	ENSG00000120868	GO:0000166	nucleotide binding	Interacting selectively and non-covalently with a nucleotide, any compound consisting of a nucleoside that is esterified with (ortho)phosphate or an oligophosphate at any hydroxyl group on the ribose or deoxyribose. [GOC:mah, ISBN:0198547684]	TAS	molecular_function
APAF1	ENSG00000120868	GO:0043531	ADP binding	Interacting selectively and non-covalently with ADP, adenosine 5'-diphosphate. [GOC:jl]	IEA	molecular_function
APAF1	ENSG00000120868	GO:0006952	defense response	Reactions, triggered in response to the presence of a foreign body or the occurrence of an injury, which result in restriction of damage to the organism attacked or prevention/recovery from the infection caused by the attack. [GOC:go_curators]	IEA	biological_process
APAF1	ENSG00000120868	GO:0005794	Golgi apparatus	A compound membranous cytoplasmic organelle of eukaryotic cells, consisting of flattened, ribosome-free vesicles arranged in a more or less regular stack. The Golgi apparatus differs from the endoplasmic reticulum in often having slightly thicker membranes, appearing in sections as a characteristic shallow semicircle so that the convex side (cis or entry face) abuts the endoplasmic reticulum, sec…	IDA	cellular_component
APAF1	ENSG00000120868	GO:0005622	intracellular	The living contents of a cell; the matter contained within (but not including) the plasma membrane, usually taken to exclude large vacuoles and masses of secretory or ingested material. In eukaryotes it includes the nucleus and cytoplasm. [ISBN:0198506732]	IEA	cellular_component
APAF1	ENSG00000120868	GO:0042981	regulation of apoptotic process	Any process that modulates the occurrence or rate of cell death by apoptotic process. [GOC:jl, GOC:mtg_apoptosis]	IEA	biological_process
APAF1	ENSG00000120868	GO:0005524	ATP binding	Interacting selectively and non-covalently with ATP, adenosine 5'-triphosphate, a universally important coenzyme and enzyme regulator. [ISBN:0198506732]	IEA	molecular_function
APAF1	ENSG00000120868	GO:0005737	cytoplasm	All of the contents of a cell excluding the plasma membrane and nucleus, but including other subcellular structures. [ISBN:0198547684]	IDA	cellular_component
APAF1	ENSG00000120868	GO:0005515	protein binding	Interacting selectively and non-covalently with any protein or protein complex (a complex of two or more proteins that may include other nonprotein molecules). [GOC:go_curators]	IEA	molecular_function
APAF1	ENSG00000120868	GO:0005634	nucleus	A membrane-bounded organelle of eukaryotic cells in which chromosomes are housed and replicated. In most cells, the nucleus contains all of the cell's chromosomes except the organellar chromosomes, and is the site of RNA synthesis and processing. In some species, or in specialized cell types, RNA metabolism or DNA replication may be absent. [GOC:go_curators]	IDA	cellular_component
APAF1	ENSG00000120868	GO:0072432	response to G1 DNA damage checkpoint signaling	A process that acts directly to delay or stop progression through the cell cycle in response to signals generated as a result of mitotic cell cycle G1/S transition DNA damage checkpoint signaling; contributes to a mitotic cell cycle G1/S transition DNA damage checkpoint. [GOC:mtg_cell_cycle]	TAS	biological_process
APAF1	ENSG00000120868	GO:0043293	apoptosome	A multisubunit protein complex involved in the signaling phase of the apoptotic process. In mammals it is typically composed of seven Apaf-1 subunits bound to cytochrome c and caspase-9. A similar complex to promote apoptosis is formed from homologous gene products in other eukaryotic organisms. [GOC:mtg_apoptosis, PMID:10428850, PMID:11406413, PMID:12176339, PMID:15189137]	TAS	cellular_component
APAF1	ENSG00000120868	GO:0008635	activation of cysteine-type endopeptidase activity involved in apoptotic process by cytochrome c	Any process that initiates the activity of the inactive enzyme cysteine-type endopeptidase in the context of an apoptotic process and is mediated by cytochrome c. [GOC:dph, GOC:jl, GOC:mtg_apoptosis, GOC:tb, PMID:14744432, Wikipedia:Caspase]	IDA	biological_process
APAF1	ENSG00000120868	GO:0006919	activation of cysteine-type endopeptidase activity involved in apoptotic process	Any process that initiates the activity of the inactive enzyme cysteine-type endopeptidase in the context of an apoptotic process. [GOC:al, GOC:dph, GOC:jl, GOC:mtg_apoptosis, GOC:tb, PMID:14744432, PMID:18328827, Wikipedia:Caspase]	IDA	biological_process
APAF1	ENSG00000120868	GO:0008656	cysteine-type endopeptidase activator activity involved in apoptotic process	Increases the rate of proteolysis catalyzed by a cysteine-type endopeptidase involved in the apoptotic process. [GOC:mah, GOC:mtg_apoptosis]	NAS	molecular_function
APAF1	ENSG00000120868	GO:0006309	apoptotic DNA fragmentation	The cleavage of DNA during apoptosis, which usually occurs in two stages: cleavage into fragments of about 50 kbp followed by cleavage between nucleosomes to yield 200 bp fragments. [GOC:dph, GOC:mah, GOC:mtg_apoptosis, GOC:tb, ISBN:0721639976]	IEA	biological_process
APAF1	ENSG00000120868	GO:0097193	intrinsic apoptotic signaling pathway	A series of molecular signals in which an intracellular signal is conveyed to trigger the apoptotic death of a cell. The pathway starts with reception of an intracellular signal (e.g. DNA damage, endoplasmic reticulum stress, oxidative stress etc.), and ends when the execution phase of apoptosis is triggered. The intrinsic apoptotic signaling pathway is crucially regulated by permeabilization of …	TAS	biological_process
APAF1	ENSG00000120868	GO:0051402	neuron apoptotic process	Any apoptotic process in a neuron, the basic cellular unit of nervous tissue. Each neuron consists of a body, an axon, and dendrites. Their purpose is to receive, conduct, and transmit impulses in the nervous system. [CL:0000540, GOC:mtg_apoptosis, MeSH:A.08.663]	IEA	biological_process
APAF1	ENSG00000120868	GO:0030900	forebrain development	The process whose specific outcome is the progression of the forebrain over time, from its formation to the mature structure. The forebrain is the anterior of the three primary divisions of the developing chordate brain or the corresponding part of the adult brain (in vertebrates, includes especially the cerebral hemispheres, the thalamus, and the hypothalamus and especially in higher vertebrates…	IEA	biological_process
APAF1	ENSG00000120868	GO:0043531	ADP binding	Interacting selectively and non-covalently with ADP, adenosine 5'-diphosphate. [GOC:jl]	IEA	molecular_function
APAF1	ENSG00000120868	GO:0042802	identical protein binding	Interacting selectively and non-covalently with an identical protein or proteins. [GOC:jl]	IEA	molecular_function
APAF1	ENSG00000120868	GO:0007399	nervous system development	The process whose specific outcome is the progression of nervous tissue over time, from its formation to its mature state. [GOC:dgh]	TAS	biological_process
APAF1	ENSG00000120868	GO:0001843	neural tube closure	The last step in the formation of the neural tube, where the paired neural folds are brought together and fuse at the dorsal midline. [GOC:dph, ISBN:0878932437]	IEA	biological_process
APAF1	ENSG00000120868	GO:0006952	defense response	Reactions, triggered in response to the presence of a foreign body or the occurrence of an injury, which result in restriction of damage to the organism attacked or prevention/recovery from the infection caused by the attack. [GOC:go_curators]	IEA	biological_process
APAF1	ENSG00000120868	GO:0043065	positive regulation of apoptotic process	Any process that activates or increases the frequency, rate or extent of cell death by apoptotic process. [GOC:jl, GOC:mtg_apoptosis]	TAS	biological_process
APAF1	ENSG00000120868	GO:0005794	Golgi apparatus	A compound membranous cytoplasmic organelle of eukaryotic cells, consisting of flattened, ribosome-free vesicles arranged in a more or less regular stack. The Golgi apparatus differs from the endoplasmic reticulum in often having slightly thicker membranes, appearing in sections as a characteristic shallow semicircle so that the convex side (cis or entry face) abuts the endoplasmic reticulum, sec…	IDA	cellular_component
APAF1	ENSG00000120868	GO:0005622	intracellular	The living contents of a cell; the matter contained within (but not including) the plasma membrane, usually taken to exclude large vacuoles and masses of secretory or ingested material. In eukaryotes it includes the nucleus and cytoplasm. [ISBN:0198506732]	IEA	cellular_component
APAF1	ENSG00000120868	GO:0042981	regulation of apoptotic process	Any process that modulates the occurrence or rate of cell death by apoptotic process. [GOC:jl, GOC:mtg_apoptosis]	TAS	biological_process
APAF1	ENSG00000120868	GO:0005829	cytosol	The part of the cytoplasm that does not contain organelles but which does contain other particulate matter, such as protein complexes. [GOC:hgd, GOC:jl]	TAS	cellular_component
APAF1	ENSG00000120868	GO:0006915	apoptotic process	A programmed cell death process which begins when a cell receives an internal (e.g. DNA damage) or external signal (e.g. an extracellular death ligand), and proceeds through a series of biochemical events (signaling pathways) which typically lead to rounding-up of the cell, retraction of pseudopodes, reduction of cellular volume (pyknosis), chromatin condensation, nuclear fragmentation (karyorrhe…	TAS	biological_process
APAF1	ENSG00000120868	GO:0005524	ATP binding	Interacting selectively and non-covalently with ATP, adenosine 5'-triphosphate, a universally important coenzyme and enzyme regulator. [ISBN:0198506732]	IEA	molecular_function
APAF1	ENSG00000120868	GO:0005737	cytoplasm	All of the contents of a cell excluding the plasma membrane and nucleus, but including other subcellular structures. [ISBN:0198547684]	IDA	cellular_component
APAF1	ENSG00000120868	GO:0005515	protein binding	Interacting selectively and non-covalently with any protein or protein complex (a complex of two or more proteins that may include other nonprotein molecules). [GOC:go_curators]	IPI	molecular_function
APAF1	ENSG00000120868	GO:0005634	nucleus	A membrane-bounded organelle of eukaryotic cells in which chromosomes are housed and replicated. In most cells, the nucleus contains all of the cell's chromosomes except the organellar chromosomes, and is the site of RNA synthesis and processing. In some species, or in specialized cell types, RNA metabolism or DNA replication may be absent. [GOC:go_curators]	IDA	cellular_component
APAF1	ENSG00000120868	GO:0000166	nucleotide binding	Interacting selectively and non-covalently with a nucleotide, any compound consisting of a nucleoside that is esterified with (ortho)phosphate or an oligophosphate at any hydroxyl group on the ribose or deoxyribose. [GOC:mah, ISBN:0198547684]	TAS	molecular_function
APAF1	ENSG00000120868	GO:0043531	ADP binding	Interacting selectively and non-covalently with ADP, adenosine 5'-diphosphate. [GOC:jl]	IEA	molecular_function
APAF1	ENSG00000120868	GO:0006952	defense response	Reactions, triggered in response to the presence of a foreign body or the occurrence of an injury, which result in restriction of damage to the organism attacked or prevention/recovery from the infection caused by the attack. [GOC:go_curators]	IEA	biological_process
APAF1	ENSG00000120868	GO:0005794	Golgi apparatus	A compound membranous cytoplasmic organelle of eukaryotic cells, consisting of flattened, ribosome-free vesicles arranged in a more or less regular stack. The Golgi apparatus differs from the endoplasmic reticulum in often having slightly thicker membranes, appearing in sections as a characteristic shallow semicircle so that the convex side (cis or entry face) abuts the endoplasmic reticulum, sec…	IDA	cellular_component
APAF1	ENSG00000120868	GO:0005622	intracellular	The living contents of a cell; the matter contained within (but not including) the plasma membrane, usually taken to exclude large vacuoles and masses of secretory or ingested material. In eukaryotes it includes the nucleus and cytoplasm. [ISBN:0198506732]	IEA	cellular_component
APAF1	ENSG00000120868	GO:0042981	regulation of apoptotic process	Any process that modulates the occurrence or rate of cell death by apoptotic process. [GOC:jl, GOC:mtg_apoptosis]	IEA	biological_process
APAF1	ENSG00000120868	GO:0005524	ATP binding	Interacting selectively and non-covalently with ATP, adenosine 5'-triphosphate, a universally important coenzyme and enzyme regulator. [ISBN:0198506732]	IEA	molecular_function
APAF1	ENSG00000120868	GO:0005737	cytoplasm	All of the contents of a cell excluding the plasma membrane and nucleus, but including other subcellular structures. [ISBN:0198547684]	IDA	cellular_component
APAF1	ENSG00000120868	GO:0005515	protein binding	Interacting selectively and non-covalently with any protein or protein complex (a complex of two or more proteins that may include other nonprotein molecules). [GOC:go_curators]	IEA	molecular_function
APAF1	ENSG00000120868	GO:0005634	nucleus	A membrane-bounded organelle of eukaryotic cells in which chromosomes are housed and replicated. In most cells, the nucleus contains all of the cell's chromosomes except the organellar chromosomes, and is the site of RNA synthesis and processing. In some species, or in specialized cell types, RNA metabolism or DNA replication may be absent. [GOC:go_curators]	IDA	cellular_component
APAF1	ENSG00000120868	GO:0072432	response to G1 DNA damage checkpoint signaling	A process that acts directly to delay or stop progression through the cell cycle in response to signals generated as a result of mitotic cell cycle G1/S transition DNA damage checkpoint signaling; contributes to a mitotic cell cycle G1/S transition DNA damage checkpoint. [GOC:mtg_cell_cycle]	TAS	biological_process
APAF1	ENSG00000120868	GO:0043293	apoptosome	A multisubunit protein complex involved in the signaling phase of the apoptotic process. In mammals it is typically composed of seven Apaf-1 subunits bound to cytochrome c and caspase-9. A similar complex to promote apoptosis is formed from homologous gene products in other eukaryotic organisms. [GOC:mtg_apoptosis, PMID:10428850, PMID:11406413, PMID:12176339, PMID:15189137]	TAS	cellular_component
APAF1	ENSG00000120868	GO:0008635	activation of cysteine-type endopeptidase activity involved in apoptotic process by cytochrome c	Any process that initiates the activity of the inactive enzyme cysteine-type endopeptidase in the context of an apoptotic process and is mediated by cytochrome c. [GOC:dph, GOC:jl, GOC:mtg_apoptosis, GOC:tb, PMID:14744432, Wikipedia:Caspase]	IDA	biological_process
APAF1	ENSG00000120868	GO:0006919	activation of cysteine-type endopeptidase activity involved in apoptotic process	Any process that initiates the activity of the inactive enzyme cysteine-type endopeptidase in the context of an apoptotic process. [GOC:al, GOC:dph, GOC:jl, GOC:mtg_apoptosis, GOC:tb, PMID:14744432, PMID:18328827, Wikipedia:Caspase]	IDA	biological_process
APAF1	ENSG00000120868	GO:0008656	cysteine-type endopeptidase activator activity involved in apoptotic process	Increases the rate of proteolysis catalyzed by a cysteine-type endopeptidase involved in the apoptotic process. [GOC:mah, GOC:mtg_apoptosis]	NAS	molecular_function
APAF1	ENSG00000120868	GO:0006309	apoptotic DNA fragmentation	The cleavage of DNA during apoptosis, which usually occurs in two stages: cleavage into fragments of about 50 kbp followed by cleavage between nucleosomes to yield 200 bp fragments. [GOC:dph, GOC:mah, GOC:mtg_apoptosis, GOC:tb, ISBN:0721639976]	IEA	biological_process
APAF1	ENSG00000120868	GO:0097193	intrinsic apoptotic signaling pathway	A series of molecular signals in which an intracellular signal is conveyed to trigger the apoptotic death of a cell. The pathway starts with reception of an intracellular signal (e.g. DNA damage, endoplasmic reticulum stress, oxidative stress etc.), and ends when the execution phase of apoptosis is triggered. The intrinsic apoptotic signaling pathway is crucially regulated by permeabilization of …	TAS	biological_process
APAF1	ENSG00000120868	GO:0051402	neuron apoptotic process	Any apoptotic process in a neuron, the basic cellular unit of nervous tissue. Each neuron consists of a body, an axon, and dendrites. Their purpose is to receive, conduct, and transmit impulses in the nervous system. [CL:0000540, GOC:mtg_apoptosis, MeSH:A.08.663]	IEA	biological_process
APAF1	ENSG00000120868	GO:0030900	forebrain development	The process whose specific outcome is the progression of the forebrain over time, from its formation to the mature structure. The forebrain is the anterior of the three primary divisions of the developing chordate brain or the corresponding part of the adult brain (in vertebrates, includes especially the cerebral hemispheres, the thalamus, and the hypothalamus and especially in higher vertebrates…	IEA	biological_process
APAF1	ENSG00000120868	GO:0043531	ADP binding	Interacting selectively and non-covalently with ADP, adenosine 5'-diphosphate. [GOC:jl]	IEA	molecular_function
APAF1	ENSG00000120868	GO:0042802	identical protein binding	Interacting selectively and non-covalently with an identical protein or proteins. [GOC:jl]	IEA	molecular_function
APAF1	ENSG00000120868	GO:0007399	nervous system development	The process whose specific outcome is the progression of nervous tissue over time, from its formation to its mature state. [GOC:dgh]	TAS	biological_process
APAF1	ENSG00000120868	GO:0001843	neural tube closure	The last step in the formation of the neural tube, where the paired neural folds are brought together and fuse at the dorsal midline. [GOC:dph, ISBN:0878932437]	IEA	biological_process
APAF1	ENSG00000120868	GO:0006952	defense response	Reactions, triggered in response to the presence of a foreign body or the occurrence of an injury, which result in restriction of damage to the organism attacked or prevention/recovery from the infection caused by the attack. [GOC:go_curators]	IEA	biological_process
APAF1	ENSG00000120868	GO:0043065	positive regulation of apoptotic process	Any process that activates or increases the frequency, rate or extent of cell death by apoptotic process. [GOC:jl, GOC:mtg_apoptosis]	TAS	biological_process
APAF1	ENSG00000120868	GO:0005794	Golgi apparatus	A compound membranous cytoplasmic organelle of eukaryotic cells, consisting of flattened, ribosome-free vesicles arranged in a more or less regular stack. The Golgi apparatus differs from the endoplasmic reticulum in often having slightly thicker membranes, appearing in sections as a characteristic shallow semicircle so that the convex side (cis or entry face) abuts the endoplasmic reticulum, sec…	IDA	cellular_component
APAF1	ENSG00000120868	GO:0005622	intracellular	The living contents of a cell; the matter contained within (but not including) the plasma membrane, usually taken to exclude large vacuoles and masses of secretory or ingested material. In eukaryotes it includes the nucleus and cytoplasm. [ISBN:0198506732]	IEA	cellular_component
APAF1	ENSG00000120868	GO:0042981	regulation of apoptotic process	Any process that modulates the occurrence or rate of cell death by apoptotic process. [GOC:jl, GOC:mtg_apoptosis]	TAS	biological_process
APAF1	ENSG00000120868	GO:0005829	cytosol	The part of the cytoplasm that does not contain organelles but which does contain other particulate matter, such as protein complexes. [GOC:hgd, GOC:jl]	TAS	cellular_component
APAF1	ENSG00000120868	GO:0006915	apoptotic process	A programmed cell death process which begins when a cell receives an internal (e.g. DNA damage) or external signal (e.g. an extracellular death ligand), and proceeds through a series of biochemical events (signaling pathways) which typically lead to rounding-up of the cell, retraction of pseudopodes, reduction of cellular volume (pyknosis), chromatin condensation, nuclear fragmentation (karyorrhe…	TAS	biological_process
APAF1	ENSG00000120868	GO:0005524	ATP binding	Interacting selectively and non-covalently with ATP, adenosine 5'-triphosphate, a universally important coenzyme and enzyme regulator. [ISBN:0198506732]	IEA	molecular_function
APAF1	ENSG00000120868	GO:0005737	cytoplasm	All of the contents of a cell excluding the plasma membrane and nucleus, but including other subcellular structures. [ISBN:0198547684]	IDA	cellular_component
APAF1	ENSG00000120868	GO:0005515	protein binding	Interacting selectively and non-covalently with any protein or protein complex (a complex of two or more proteins that may include other nonprotein molecules). [GOC:go_curators]	IPI	molecular_function
APAF1	ENSG00000120868	GO:0005634	nucleus	A membrane-bounded organelle of eukaryotic cells in which chromosomes are housed and replicated. In most cells, the nucleus contains all of the cell's chromosomes except the organellar chromosomes, and is the site of RNA synthesis and processing. In some species, or in specialized cell types, RNA metabolism or DNA replication may be absent. [GOC:go_curators]	IDA	cellular_component
APAF1	ENSG00000120868	GO:0000166	nucleotide binding	Interacting selectively and non-covalently with a nucleotide, any compound consisting of a nucleoside that is esterified with (ortho)phosphate or an oligophosphate at any hydroxyl group on the ribose or deoxyribose. [GOC:mah, ISBN:0198547684]	TAS	molecular_function
ATF3	ENSG00000162772	GO:0006094	gluconeogenesis	The formation of glucose from noncarbohydrate precursors, such as pyruvate, amino acids and glycerol. [MetaCyc:GLUCONEO-PWY]	IEA	biological_process
ATF3	ENSG00000162772	GO:0006950	response to stress	Any process that results in a change in state or activity of a cell or an organism (in terms of movement, secretion, enzyme production, gene expression, etc.) as a result of a disturbance in organismal or cellular homeostasis, usually, but not necessarily, exogenous (e.g. temperature, humidity, ionizing radiation). [GOC:mah]	IEA	biological_process
ATF3	ENSG00000162772	GO:0035914	skeletal muscle cell differentiation	The process in which a relatively unspecialized cell acquires specialized features of a skeletal muscle cell, a somatic cell located in skeletal muscle. [CL:0000188, GOC:BHF, GOC:vk]	IEA	biological_process
ATF3	ENSG00000162772	GO:0043565	sequence-specific DNA binding	Interacting selectively and non-covalently with DNA of a specific nucleotide composition, e.g. GC-rich DNA binding, or with a specific sequence motif or type of DNA e.g. promotor binding or rDNA binding. [GOC:jl]	IEA	molecular_function
ATF3	ENSG00000162772	GO:0008284	positive regulation of cell proliferation	Any process that activates or increases the rate or extent of cell proliferation. [GOC:go_curators]	IEA	biological_process
ATF3	ENSG00000162772	GO:0006355	regulation of transcription, DNA-dependent	Any process that modulates the frequency, rate or extent of cellular DNA-dependent transcription. [GOC:go_curators, GOC:txnOH]	IEA	biological_process
ATF3	ENSG00000162772	GO:0005730	nucleolus	A small, dense body one or more of which are present in the nucleus of eukaryotic cells. It is rich in RNA and protein, is not bounded by a limiting membrane, and is not seen during mitosis. Its prime function is the transcription of the nucleolar DNA into 45S ribosomal-precursor RNA, the processing of this RNA into 5.8S, 18S, and 28S components of ribosomal RNA, and the association of these comp…	IDA	cellular_component
ATF3	ENSG00000162772	GO:0045892	negative regulation of transcription, DNA-dependent	Any process that stops, prevents, or reduces the frequency, rate or extent of cellular DNA-dependent transcription. [GOC:go_curators, GOC:txnOH]	IEA	biological_process
ATF3	ENSG00000162772	GO:0003677	DNA binding	Any molecular function by which a gene product interacts selectively and non-covalently with DNA (deoxyribonucleic acid). [GOC:dph, GOC:jl, GOC:tb, GOC:vw]	IEA	molecular_function
ATF3	ENSG00000162772	GO:0003700	sequence-specific DNA binding transcription factor activity	Interacting selectively and non-covalently with a specific DNA sequence in order to modulate transcription. The transcription factor may or may not also interact selectively with a protein or macromolecular complex. [GOC:curators, GOC:txnOH]	IEA	molecular_function
ATF3	ENSG00000162772	GO:0005634	nucleus	A membrane-bounded organelle of eukaryotic cells in which chromosomes are housed and replicated. In most cells, the nucleus contains all of the cell's chromosomes except the organellar chromosomes, and is the site of RNA synthesis and processing. In some species, or in specialized cell types, RNA metabolism or DNA replication may be absent. [GOC:go_curators]	IDA	cellular_component
ATF3	ENSG00000162772	GO:0006987	activation of signaling protein activity involved in unfolded protein response	The conversion of a specific protein, possessing protein kinase and endoribonuclease activities, to an active form as a result of signaling via the unfolded protein response. [GOC:dph, GOC:mah, GOC:tb, PMID:12042763]	TAS	biological_process
ATF3	ENSG00000162772	GO:0030968	endoplasmic reticulum unfolded protein response	The series of molecular signals generated as a consequence of the presence of unfolded proteins in the endoplasmic reticulum (ER) or other ER-related stress; results in changes in the regulation of transcription and translation. [GOC:mah, PMID:12042763]	TAS	biological_process
ATF3	ENSG00000162772	GO:0044267	cellular protein metabolic process	The chemical reactions and pathways involving a specific protein, rather than of proteins in general, occurring at the level of an individual cell. Includes cellular protein modification. [GOC:jl]	TAS	biological_process
ATF3	ENSG00000162772	GO:0006094	gluconeogenesis	The formation of glucose from noncarbohydrate precursors, such as pyruvate, amino acids and glycerol. [MetaCyc:GLUCONEO-PWY]	IEA	biological_process
ATF3	ENSG00000162772	GO:0042802	identical protein binding	Interacting selectively and non-covalently with an identical protein or proteins. [GOC:jl]	IPI	molecular_function
ATF3	ENSG00000162772	GO:0006950	response to stress	Any process that results in a change in state or activity of a cell or an organism (in terms of movement, secretion, enzyme production, gene expression, etc.) as a result of a disturbance in organismal or cellular homeostasis, usually, but not necessarily, exogenous (e.g. temperature, humidity, ionizing radiation). [GOC:mah]	IEA	biological_process
ATF3	ENSG00000162772	GO:0005654	nucleoplasm	That part of the nuclear content other than the chromosomes or the nucleolus. [GOC:ma, ISBN:0124325653]	TAS	cellular_component
ATF3	ENSG00000162772	GO:0035914	skeletal muscle cell differentiation	The process in which a relatively unspecialized cell acquires specialized features of a skeletal muscle cell, a somatic cell located in skeletal muscle. [CL:0000188, GOC:BHF, GOC:vk]	IEA	biological_process
ATF3	ENSG00000162772	GO:0043565	sequence-specific DNA binding	Interacting selectively and non-covalently with DNA of a specific nucleotide composition, e.g. GC-rich DNA binding, or with a specific sequence motif or type of DNA e.g. promotor binding or rDNA binding. [GOC:jl]	IEA	molecular_function
ATF3	ENSG00000162772	GO:0008284	positive regulation of cell proliferation	Any process that activates or increases the rate or extent of cell proliferation. [GOC:go_curators]	IEA	biological_process
ATF3	ENSG00000162772	GO:0006355	regulation of transcription, DNA-dependent	Any process that modulates the frequency, rate or extent of cellular DNA-dependent transcription. [GOC:go_curators, GOC:txnOH]	IEA	biological_process
ATF3	ENSG00000162772	GO:0005730	nucleolus	A small, dense body one or more of which are present in the nucleus of eukaryotic cells. It is rich in RNA and protein, is not bounded by a limiting membrane, and is not seen during mitosis. Its prime function is the transcription of the nucleolar DNA into 45S ribosomal-precursor RNA, the processing of this RNA into 5.8S, 18S, and 28S components of ribosomal RNA, and the association of these comp…	IDA	cellular_component
ATF3	ENSG00000162772	GO:0045892	negative regulation of transcription, DNA-dependent	Any process that stops, prevents, or reduces the frequency, rate or extent of cellular DNA-dependent transcription. [GOC:go_curators, GOC:txnOH]	IEA	biological_process
ATF3	ENSG00000162772	GO:0003677	DNA binding	Any molecular function by which a gene product interacts selectively and non-covalently with DNA (deoxyribonucleic acid). [GOC:dph, GOC:jl, GOC:tb, GOC:vw]	IEA	molecular_function
ATF3	ENSG00000162772	GO:0006351	transcription, DNA-templated	The cellular synthesis of RNA on a template of DNA. [GOC:jl, GOC:txnOH]	IEA	biological_process
ATF3	ENSG00000162772	GO:0005515	protein binding	Interacting selectively and non-covalently with any protein or protein complex (a complex of two or more proteins that may include other nonprotein molecules). [GOC:go_curators]	IPI	molecular_function
ATF3	ENSG00000162772	GO:0003714	transcription corepressor activity	Interacting selectively and non-covalently with a repressing transcription factor and also with the basal transcription machinery in order to stop, prevent, or reduce the frequency, rate or extent of transcription. Cofactors generally do not bind DNA, but rather mediate protein-protein interactions between repressive transcription factors and the basal transcription machinery. [GOC:txnOH, PMID:10…	TAS	molecular_function
ATF3	ENSG00000162772	GO:0003700	sequence-specific DNA binding transcription factor activity	Interacting selectively and non-covalently with a specific DNA sequence in order to modulate transcription. The transcription factor may or may not also interact selectively with a protein or macromolecular complex. [GOC:curators, GOC:txnOH]	IEA	molecular_function
ATF3	ENSG00000162772	GO:0005634	nucleus	A membrane-bounded organelle of eukaryotic cells in which chromosomes are housed and replicated. In most cells, the nucleus contains all of the cell's chromosomes except the organellar chromosomes, and is the site of RNA synthesis and processing. In some species, or in specialized cell types, RNA metabolism or DNA replication may be absent. [GOC:go_curators]	IDA	cellular_component
ATF3	ENSG00000162772	GO:0005634	nucleus	A membrane-bounded organelle of eukaryotic cells in which chromosomes are housed and replicated. In most cells, the nucleus contains all of the cell's chromosomes except the organellar chromosomes, and is the site of RNA synthesis and processing. In some species, or in specialized cell types, RNA metabolism or DNA replication may be absent. [GOC:go_curators]	IEA	cellular_component
ATF3	ENSG00000162772	GO:0006987	activation of signaling protein activity involved in unfolded protein response	The conversion of a specific protein, possessing protein kinase and endoribonuclease activities, to an active form as a result of signaling via the unfolded protein response. [GOC:dph, GOC:mah, GOC:tb, PMID:12042763]	TAS	biological_process
ATF3	ENSG00000162772	GO:0030968	endoplasmic reticulum unfolded protein response	The series of molecular signals generated as a consequence of the presence of unfolded proteins in the endoplasmic reticulum (ER) or other ER-related stress; results in changes in the regulation of transcription and translation. [GOC:mah, PMID:12042763]	TAS	biological_process
ATF3	ENSG00000162772	GO:0044267	cellular protein metabolic process	The chemical reactions and pathways involving a specific protein, rather than of proteins in general, occurring at the level of an individual cell. Includes cellular protein modification. [GOC:jl]	TAS	biological_process
ATF3	ENSG00000162772	GO:0006094	gluconeogenesis	The formation of glucose from noncarbohydrate precursors, such as pyruvate, amino acids and glycerol. [MetaCyc:GLUCONEO-PWY]	IEA	biological_process
ATF3	ENSG00000162772	GO:0042802	identical protein binding	Interacting selectively and non-covalently with an identical protein or proteins. [GOC:jl]	IPI	molecular_function
ATF3	ENSG00000162772	GO:0005654	nucleoplasm	That part of the nuclear content other than the chromosomes or the nucleolus. [GOC:ma, ISBN:0124325653]	TAS	cellular_component
ATF3	ENSG00000162772	GO:0035914	skeletal muscle cell differentiation	The process in which a relatively unspecialized cell acquires specialized features of a skeletal muscle cell, a somatic cell located in skeletal muscle. [CL:0000188, GOC:BHF, GOC:vk]	IEA	biological_process
ATF3	ENSG00000162772	GO:0043565	sequence-specific DNA binding	Interacting selectively and non-covalently with DNA of a specific nucleotide composition, e.g. GC-rich DNA binding, or with a specific sequence motif or type of DNA e.g. promotor binding or rDNA binding. [GOC:jl]	IEA	molecular_function
ATF3	ENSG00000162772	GO:0008284	positive regulation of cell proliferation	Any process that activates or increases the rate or extent of cell proliferation. [GOC:go_curators]	IEA	biological_process
ATF3	ENSG00000162772	GO:0006355	regulation of transcription, DNA-dependent	Any process that modulates the frequency, rate or extent of cellular DNA-dependent transcription. [GOC:go_curators, GOC:txnOH]	IEA	biological_process
ATF3	ENSG00000162772	GO:0005730	nucleolus	A small, dense body one or more of which are present in the nucleus of eukaryotic cells. It is rich in RNA and protein, is not bounded by a limiting membrane, and is not seen during mitosis. Its prime function is the transcription of the nucleolar DNA into 45S ribosomal-precursor RNA, the processing of this RNA into 5.8S, 18S, and 28S components of ribosomal RNA, and the association of these comp…	IDA	cellular_component
ATF3	ENSG00000162772	GO:0045892	negative regulation of transcription, DNA-dependent	Any process that stops, prevents, or reduces the frequency, rate or extent of cellular DNA-dependent transcription. [GOC:go_curators, GOC:txnOH]	IEA	biological_process
ATF3	ENSG00000162772	GO:0003677	DNA binding	Any molecular function by which a gene product interacts selectively and non-covalently with DNA (deoxyribonucleic acid). [GOC:dph, GOC:jl, GOC:tb, GOC:vw]	IEA	molecular_function
ATF3	ENSG00000162772	GO:0006351	transcription, DNA-templated	The cellular synthesis of RNA on a template of DNA. [GOC:jl, GOC:txnOH]	IEA	biological_process
ATF3	ENSG00000162772	GO:0005515	protein binding	Interacting selectively and non-covalently with any protein or protein complex (a complex of two or more proteins that may include other nonprotein molecules). [GOC:go_curators]	IPI	molecular_function
ATF3	ENSG00000162772	GO:0003714	transcription corepressor activity	Interacting selectively and non-covalently with a repressing transcription factor and also with the basal transcription machinery in order to stop, prevent, or reduce the frequency, rate or extent of transcription. Cofactors generally do not bind DNA, but rather mediate protein-protein interactions between repressive transcription factors and the basal transcription machinery. [GOC:txnOH, PMID:10…	TAS	molecular_function
ATF3	ENSG00000162772	GO:0003700	sequence-specific DNA binding transcription factor activity	Interacting selectively and non-covalently with a specific DNA sequence in order to modulate transcription. The transcription factor may or may not also interact selectively with a protein or macromolecular complex. [GOC:curators, GOC:txnOH]	IEA	molecular_function
ATF3	ENSG00000162772	GO:0005634	nucleus	A membrane-bounded organelle of eukaryotic cells in which chromosomes are housed and replicated. In most cells, the nucleus contains all of the cell's chromosomes except the organellar chromosomes, and is the site of RNA synthesis and processing. In some species, or in specialized cell types, RNA metabolism or DNA replication may be absent. [GOC:go_curators]	IDA	cellular_component
ATF3	ENSG00000162772	GO:0006987	activation of signaling protein activity involved in unfolded protein response	The conversion of a specific protein, possessing protein kinase and endoribonuclease activities, to an active form as a result of signaling via the unfolded protein response. [GOC:dph, GOC:mah, GOC:tb, PMID:12042763]	TAS	biological_process
ATF3	ENSG00000162772	GO:0030968	endoplasmic reticulum unfolded protein response	The series of molecular signals generated as a consequence of the presence of unfolded proteins in the endoplasmic reticulum (ER) or other ER-related stress; results in changes in the regulation of transcription and translation. [GOC:mah, PMID:12042763]	TAS	biological_process
ATF3	ENSG00000162772	GO:0044267	cellular protein metabolic process	The chemical reactions and pathways involving a specific protein, rather than of proteins in general, occurring at the level of an individual cell. Includes cellular protein modification. [GOC:jl]	TAS	biological_process
ATF3	ENSG00000162772	GO:0006094	gluconeogenesis	The formation of glucose from noncarbohydrate precursors, such as pyruvate, amino acids and glycerol. [MetaCyc:GLUCONEO-PWY]	IEA	biological_process
ATF3	ENSG00000162772	GO:0042802	identical protein binding	Interacting selectively and non-covalently with an identical protein or proteins. [GOC:jl]	IPI	molecular_function
ATF3	ENSG00000162772	GO:0005654	nucleoplasm	That part of the nuclear content other than the chromosomes or the nucleolus. [GOC:ma, ISBN:0124325653]	TAS	cellular_component
ATF3	ENSG00000162772	GO:0035914	skeletal muscle cell differentiation	The process in which a relatively unspecialized cell acquires specialized features of a skeletal muscle cell, a somatic cell located in skeletal muscle. [CL:0000188, GOC:BHF, GOC:vk]	IEA	biological_process
ATF3	ENSG00000162772	GO:0043565	sequence-specific DNA binding	Interacting selectively and non-covalently with DNA of a specific nucleotide composition, e.g. GC-rich DNA binding, or with a specific sequence motif or type of DNA e.g. promotor binding or rDNA binding. [GOC:jl]	IEA	molecular_function
ATF3	ENSG00000162772	GO:0008284	positive regulation of cell proliferation	Any process that activates or increases the rate or extent of cell proliferation. [GOC:go_curators]	IEA	biological_process
ATF3	ENSG00000162772	GO:0006355	regulation of transcription, DNA-dependent	Any process that modulates the frequency, rate or extent of cellular DNA-dependent transcription. [GOC:go_curators, GOC:txnOH]	IEA	biological_process
ATF3	ENSG00000162772	GO:0005730	nucleolus	A small, dense body one or more of which are present in the nucleus of eukaryotic cells. It is rich in RNA and protein, is not bounded by a limiting membrane, and is not seen during mitosis. Its prime function is the transcription of the nucleolar DNA into 45S ribosomal-precursor RNA, the processing of this RNA into 5.8S, 18S, and 28S components of ribosomal RNA, and the association of these comp…	IDA	cellular_component
ATF3	ENSG00000162772	GO:0045892	negative regulation of transcription, DNA-dependent	Any process that stops, prevents, or reduces the frequency, rate or extent of cellular DNA-dependent transcription. [GOC:go_curators, GOC:txnOH]	IEA	biological_process
ATF3	ENSG00000162772	GO:0003677	DNA binding	Any molecular function by which a gene product interacts selectively and non-covalently with DNA (deoxyribonucleic acid). [GOC:dph, GOC:jl, GOC:tb, GOC:vw]	IEA	molecular_function
ATF3	ENSG00000162772	GO:0006351	transcription, DNA-templated	The cellular synthesis of RNA on a template of DNA. [GOC:jl, GOC:txnOH]	IEA	biological_process
ATF3	ENSG00000162772	GO:0005515	protein binding	Interacting selectively and non-covalently with any protein or protein complex (a complex of two or more proteins that may include other nonprotein molecules). [GOC:go_curators]	IPI	molecular_function
ATF3	ENSG00000162772	GO:0003714	transcription corepressor activity	Interacting selectively and non-covalently with a repressing transcription factor and also with the basal transcription machinery in order to stop, prevent, or reduce the frequency, rate or extent of transcription. Cofactors generally do not bind DNA, but rather mediate protein-protein interactions between repressive transcription factors and the basal transcription machinery. [GOC:txnOH, PMID:10…	TAS	molecular_function
ATF3	ENSG00000162772	GO:0003700	sequence-specific DNA binding transcription factor activity	Interacting selectively and non-covalently with a specific DNA sequence in order to modulate transcription. The transcription factor may or may not also interact selectively with a protein or macromolecular complex. [GOC:curators, GOC:txnOH]	IEA	molecular_function
ATF3	ENSG00000162772	GO:0005634	nucleus	A membrane-bounded organelle of eukaryotic cells in which chromosomes are housed and replicated. In most cells, the nucleus contains all of the cell's chromosomes except the organellar chromosomes, and is the site of RNA synthesis and processing. In some species, or in specialized cell types, RNA metabolism or DNA replication may be absent. [GOC:go_curators]	IDA	cellular_component
ATF3	ENSG00000162772	GO:0006987	activation of signaling protein activity involved in unfolded protein response	The conversion of a specific protein, possessing protein kinase and endoribonuclease activities, to an active form as a result of signaling via the unfolded protein response. [GOC:dph, GOC:mah, GOC:tb, PMID:12042763]	TAS	biological_process
ATF3	ENSG00000162772	GO:0030968	endoplasmic reticulum unfolded protein response	The series of molecular signals generated as a consequence of the presence of unfolded proteins in the endoplasmic reticulum (ER) or other ER-related stress; results in changes in the regulation of transcription and translation. [GOC:mah, PMID:12042763]	TAS	biological_process
ATF3	ENSG00000162772	GO:0044267	cellular protein metabolic process	The chemical reactions and pathways involving a specific protein, rather than of proteins in general, occurring at the level of an individual cell. Includes cellular protein modification. [GOC:jl]	TAS	biological_process
ATF3	ENSG00000162772	GO:0006094	gluconeogenesis	The formation of glucose from noncarbohydrate precursors, such as pyruvate, amino acids and glycerol. [MetaCyc:GLUCONEO-PWY]	IEA	biological_process
ATF3	ENSG00000162772	GO:0042802	identical protein binding	Interacting selectively and non-covalently with an identical protein or proteins. [GOC:jl]	IPI	molecular_function
ATF3	ENSG00000162772	GO:0005654	nucleoplasm	That part of the nuclear content other than the chromosomes or the nucleolus. [GOC:ma, ISBN:0124325653]	TAS	cellular_component
ATF3	ENSG00000162772	GO:0035914	skeletal muscle cell differentiation	The process in which a relatively unspecialized cell acquires specialized features of a skeletal muscle cell, a somatic cell located in skeletal muscle. [CL:0000188, GOC:BHF, GOC:vk]	IEA	biological_process
ATF3	ENSG00000162772	GO:0043565	sequence-specific DNA binding	Interacting selectively and non-covalently with DNA of a specific nucleotide composition, e.g. GC-rich DNA binding, or with a specific sequence motif or type of DNA e.g. promotor binding or rDNA binding. [GOC:jl]	IEA	molecular_function
ATF3	ENSG00000162772	GO:0008284	positive regulation of cell proliferation	Any process that activates or increases the rate or extent of cell proliferation. [GOC:go_curators]	IEA	biological_process
ATF3	ENSG00000162772	GO:0006355	regulation of transcription, DNA-dependent	Any process that modulates the frequency, rate or extent of cellular DNA-dependent transcription. [GOC:go_curators, GOC:txnOH]	IEA	biological_process
ATF3	ENSG00000162772	GO:0005730	nucleolus	A small, dense body one or more of which are present in the nucleus of eukaryotic cells. It is rich in RNA and protein, is not bounded by a limiting membrane, and is not seen during mitosis. Its prime function is the transcription of the nucleolar DNA into 45S ribosomal-precursor RNA, the processing of this RNA into 5.8S, 18S, and 28S components of ribosomal RNA, and the association of these comp…	IDA	cellular_component
ATF3	ENSG00000162772	GO:0045892	negative regulation of transcription, DNA-dependent	Any process that stops, prevents, or reduces the frequency, rate or extent of cellular DNA-dependent transcription. [GOC:go_curators, GOC:txnOH]	IEA	biological_process
ATF3	ENSG00000162772	GO:0003677	DNA binding	Any molecular function by which a gene product interacts selectively and non-covalently with DNA (deoxyribonucleic acid). [GOC:dph, GOC:jl, GOC:tb, GOC:vw]	IEA	molecular_function
ATF3	ENSG00000162772	GO:0006351	transcription, DNA-templated	The cellular synthesis of RNA on a template of DNA. [GOC:jl, GOC:txnOH]	IEA	biological_process
ATF3	ENSG00000162772	GO:0005515	protein binding	Interacting selectively and non-covalently with any protein or protein complex (a complex of two or more proteins that may include other nonprotein molecules). [GOC:go_curators]	IPI	molecular_function
ATF3	ENSG00000162772	GO:0003714	transcription corepressor activity	Interacting selectively and non-covalently with a repressing transcription factor and also with the basal transcription machinery in order to stop, prevent, or reduce the frequency, rate or extent of transcription. Cofactors generally do not bind DNA, but rather mediate protein-protein interactions between repressive transcription factors and the basal transcription machinery. [GOC:txnOH, PMID:10…	TAS	molecular_function
ATF3	ENSG00000162772	GO:0003700	sequence-specific DNA binding transcription factor activity	Interacting selectively and non-covalently with a specific DNA sequence in order to modulate transcription. The transcription factor may or may not also interact selectively with a protein or macromolecular complex. [GOC:curators, GOC:txnOH]	IEA	molecular_function
ATF3	ENSG00000162772	GO:0005634	nucleus	A membrane-bounded organelle of eukaryotic cells in which chromosomes are housed and replicated. In most cells, the nucleus contains all of the cell's chromosomes except the organellar chromosomes, and is the site of RNA synthesis and processing. In some species, or in specialized cell types, RNA metabolism or DNA replication may be absent. [GOC:go_curators]	IDA	cellular_component
ATF3	ENSG00000162772	GO:0006987	activation of signaling protein activity involved in unfolded protein response	The conversion of a specific protein, possessing protein kinase and endoribonuclease activities, to an active form as a result of signaling via the unfolded protein response. [GOC:dph, GOC:mah, GOC:tb, PMID:12042763]	TAS	biological_process
ATF3	ENSG00000162772	GO:0030968	endoplasmic reticulum unfolded protein response	The series of molecular signals generated as a consequence of the presence of unfolded proteins in the endoplasmic reticulum (ER) or other ER-related stress; results in changes in the regulation of transcription and translation. [GOC:mah, PMID:12042763]	TAS	biological_process
ATF3	ENSG00000162772	GO:0044267	cellular protein metabolic process	The chemical reactions and pathways involving a specific protein, rather than of proteins in general, occurring at the level of an individual cell. Includes cellular protein modification. [GOC:jl]	TAS	biological_process
ATF3	ENSG00000162772	GO:0006094	gluconeogenesis	The formation of glucose from noncarbohydrate precursors, such as pyruvate, amino acids and glycerol. [MetaCyc:GLUCONEO-PWY]	IEA	biological_process
ATF3	ENSG00000162772	GO:0042802	identical protein binding	Interacting selectively and non-covalently with an identical protein or proteins. [GOC:jl]	IPI	molecular_function
ATF3	ENSG00000162772	GO:0005654	nucleoplasm	That part of the nuclear content other than the chromosomes or the nucleolus. [GOC:ma, ISBN:0124325653]	TAS	cellular_component
ATF3	ENSG00000162772	GO:0035914	skeletal muscle cell differentiation	The process in which a relatively unspecialized cell acquires specialized features of a skeletal muscle cell, a somatic cell located in skeletal muscle. [CL:0000188, GOC:BHF, GOC:vk]	IEA	biological_process
ATF3	ENSG00000162772	GO:0043565	sequence-specific DNA binding	Interacting selectively and non-covalently with DNA of a specific nucleotide composition, e.g. GC-rich DNA binding, or with a specific sequence motif or type of DNA e.g. promotor binding or rDNA binding. [GOC:jl]	IEA	molecular_function
ATF3	ENSG00000162772	GO:0008284	positive regulation of cell proliferation	Any process that activates or increases the rate or extent of cell proliferation. [GOC:go_curators]	IEA	biological_process
ATF3	ENSG00000162772	GO:0006355	regulation of transcription, DNA-dependent	Any process that modulates the frequency, rate or extent of cellular DNA-dependent transcription. [GOC:go_curators, GOC:txnOH]	IEA	biological_process
ATF3	ENSG00000162772	GO:0005730	nucleolus	A small, dense body one or more of which are present in the nucleus of eukaryotic cells. It is rich in RNA and protein, is not bounded by a limiting membrane, and is not seen during mitosis. Its prime function is the transcription of the nucleolar DNA into 45S ribosomal-precursor RNA, the processing of this RNA into 5.8S, 18S, and 28S components of ribosomal RNA, and the association of these comp…	IDA	cellular_component
ATF3	ENSG00000162772	GO:0045892	negative regulation of transcription, DNA-dependent	Any process that stops, prevents, or reduces the frequency, rate or extent of cellular DNA-dependent transcription. [GOC:go_curators, GOC:txnOH]	IEA	biological_process
ATF3	ENSG00000162772	GO:0003677	DNA binding	Any molecular function by which a gene product interacts selectively and non-covalently with DNA (deoxyribonucleic acid). [GOC:dph, GOC:jl, GOC:tb, GOC:vw]	IEA	molecular_function
ATF3	ENSG00000162772	GO:0006351	transcription, DNA-templated	The cellular synthesis of RNA on a template of DNA. [GOC:jl, GOC:txnOH]	IEA	biological_process
ATF3	ENSG00000162772	GO:0005515	protein binding	Interacting selectively and non-covalently with any protein or protein complex (a complex of two or more proteins that may include other nonprotein molecules). [GOC:go_curators]	IPI	molecular_function
ATF3	ENSG00000162772	GO:0003714	transcription corepressor activity	Interacting selectively and non-covalently with a repressing transcription factor and also with the basal transcription machinery in order to stop, prevent, or reduce the frequency, rate or extent of transcription. Cofactors generally do not bind DNA, but rather mediate protein-protein interactions between repressive transcription factors and the basal transcription machinery. [GOC:txnOH, PMID:10…	TAS	molecular_function
ATF3	ENSG00000162772	GO:0003700	sequence-specific DNA binding transcription factor activity	Interacting selectively and non-covalently with a specific DNA sequence in order to modulate transcription. The transcription factor may or may not also interact selectively with a protein or macromolecular complex. [GOC:curators, GOC:txnOH]	IEA	molecular_function
ATF3	ENSG00000162772	GO:0005634	nucleus	A membrane-bounded organelle of eukaryotic cells in which chromosomes are housed and replicated. In most cells, the nucleus contains all of the cell's chromosomes except the organellar chromosomes, and is the site of RNA synthesis and processing. In some species, or in specialized cell types, RNA metabolism or DNA replication may be absent. [GOC:go_curators]	IDA	cellular_component
ATF3	ENSG00000162772	GO:0006987	activation of signaling protein activity involved in unfolded protein response	The conversion of a specific protein, possessing protein kinase and endoribonuclease activities, to an active form as a result of signaling via the unfolded protein response. [GOC:dph, GOC:mah, GOC:tb, PMID:12042763]	TAS	biological_process
ATF3	ENSG00000162772	GO:0030968	endoplasmic reticulum unfolded protein response	The series of molecular signals generated as a consequence of the presence of unfolded proteins in the endoplasmic reticulum (ER) or other ER-related stress; results in changes in the regulation of transcription and translation. [GOC:mah, PMID:12042763]	TAS	biological_process
ATF3	ENSG00000162772	GO:0044267	cellular protein metabolic process	The chemical reactions and pathways involving a specific protein, rather than of proteins in general, occurring at the level of an individual cell. Includes cellular protein modification. [GOC:jl]	TAS	biological_process
ATF3	ENSG00000162772	GO:0006094	gluconeogenesis	The formation of glucose from noncarbohydrate precursors, such as pyruvate, amino acids and glycerol. [MetaCyc:GLUCONEO-PWY]	IEA	biological_process
ATF3	ENSG00000162772	GO:0042802	identical protein binding	Interacting selectively and non-covalently with an identical protein or proteins. [GOC:jl]	IPI	molecular_function
ATF3	ENSG00000162772	GO:0006950	response to stress	Any process that results in a change in state or activity of a cell or an organism (in terms of movement, secretion, enzyme production, gene expression, etc.) as a result of a disturbance in organismal or cellular homeostasis, usually, but not necessarily, exogenous (e.g. temperature, humidity, ionizing radiation). [GOC:mah]	IEA	biological_process
ATF3	ENSG00000162772	GO:0005654	nucleoplasm	That part of the nuclear content other than the chromosomes or the nucleolus. [GOC:ma, ISBN:0124325653]	TAS	cellular_component
ATF3	ENSG00000162772	GO:0035914	skeletal muscle cell differentiation	The process in which a relatively unspecialized cell acquires specialized features of a skeletal muscle cell, a somatic cell located in skeletal muscle. [CL:0000188, GOC:BHF, GOC:vk]	IEA	biological_process
ATF3	ENSG00000162772	GO:0043565	sequence-specific DNA binding	Interacting selectively and non-covalently with DNA of a specific nucleotide composition, e.g. GC-rich DNA binding, or with a specific sequence motif or type of DNA e.g. promotor binding or rDNA binding. [GOC:jl]	IEA	molecular_function
ATF3	ENSG00000162772	GO:0008284	positive regulation of cell proliferation	Any process that activates or increases the rate or extent of cell proliferation. [GOC:go_curators]	IEA	biological_process
ATF3	ENSG00000162772	GO:0006355	regulation of transcription, DNA-dependent	Any process that modulates the frequency, rate or extent of cellular DNA-dependent transcription. [GOC:go_curators, GOC:txnOH]	IEA	biological_process
ATF3	ENSG00000162772	GO:0005730	nucleolus	A small, dense body one or more of which are present in the nucleus of eukaryotic cells. It is rich in RNA and protein, is not bounded by a limiting membrane, and is not seen during mitosis. Its prime function is the transcription of the nucleolar DNA into 45S ribosomal-precursor RNA, the processing of this RNA into 5.8S, 18S, and 28S components of ribosomal RNA, and the association of these comp…	IDA	cellular_component
ATF3	ENSG00000162772	GO:0045892	negative regulation of transcription, DNA-dependent	Any process that stops, prevents, or reduces the frequency, rate or extent of cellular DNA-dependent transcription. [GOC:go_curators, GOC:txnOH]	IEA	biological_process
ATF3	ENSG00000162772	GO:0003677	DNA binding	Any molecular function by which a gene product interacts selectively and non-covalently with DNA (deoxyribonucleic acid). [GOC:dph, GOC:jl, GOC:tb, GOC:vw]	IEA	molecular_function
ATF3	ENSG00000162772	GO:0006351	transcription, DNA-templated	The cellular synthesis of RNA on a template of DNA. [GOC:jl, GOC:txnOH]	IEA	biological_process
ATF3	ENSG00000162772	GO:0005515	protein binding	Interacting selectively and non-covalently with any protein or protein complex (a complex of two or more proteins that may include other nonprotein molecules). [GOC:go_curators]	IPI	molecular_function
ATF3	ENSG00000162772	GO:0003714	transcription corepressor activity	Interacting selectively and non-covalently with a repressing transcription factor and also with the basal transcription machinery in order to stop, prevent, or reduce the frequency, rate or extent of transcription. Cofactors generally do not bind DNA, but rather mediate protein-protein interactions between repressive transcription factors and the basal transcription machinery. [GOC:txnOH, PMID:10…	TAS	molecular_function
ATF3	ENSG00000162772	GO:0003700	sequence-specific DNA binding transcription factor activity	Interacting selectively and non-covalently with a specific DNA sequence in order to modulate transcription. The transcription factor may or may not also interact selectively with a protein or macromolecular complex. [GOC:curators, GOC:txnOH]	IEA	molecular_function
ATF3	ENSG00000162772	GO:0005634	nucleus	A membrane-bounded organelle of eukaryotic cells in which chromosomes are housed and replicated. In most cells, the nucleus contains all of the cell's chromosomes except the organellar chromosomes, and is the site of RNA synthesis and processing. In some species, or in specialized cell types, RNA metabolism or DNA replication may be absent. [GOC:go_curators]	IDA	cellular_component
CCBE1	ENSG00000183287	GO:0001946	lymphangiogenesis	Lymph vessel formation when new vessels emerge from the proliferation of pre-existing vessels. [GOC:dph, PMID:11596157]	ISS	biological_process
CCBE1	ENSG00000183287	GO:0048845	venous blood vessel morphogenesis	The process in which the anatomical structures of venous blood vessels are generated and organized. Veins are blood vessels that transport blood from the body and its organs to the heart. [GOC:dsf, PMID:16740480]	ISS	biological_process
CCBE1	ENSG00000183287	GO:0031012	extracellular matrix	A structure lying external to one or more cells, which provides structural support for cells or tissues; may be completely external to the cell (as in animals and bacteria) or be part of the cell (as in plants). [GOC:mah]	IDA	cellular_component
CCBE1	ENSG00000183287	GO:0005581	collagen	Any of the various assemblies in which collagen chains form a left-handed triple helix; may assemble into higher order structures. [GOC:mah, ISBN:0721639976]	IEA	cellular_component
CCBE1	ENSG00000183287	GO:0005518	collagen binding	Interacting selectively and non-covalently with collagen, a group of fibrous proteins of very high tensile strength that form the main component of connective tissue in animals. Collagen is highly enriched in glycine (some regions are 33% glycine) and proline, occurring predominantly as 3-hydroxyproline (about 20%). [GOC:ai, ISBN:0198506732]	IDA	molecular_function
CCBE1	ENSG00000183287	GO:0005509	calcium ion binding	Interacting selectively and non-covalently with calcium ions (Ca2+). [GOC:ai]	IEA	molecular_function
CCBE1	ENSG00000183287	GO:0005515	protein binding	Interacting selectively and non-covalently with any protein or protein complex (a complex of two or more proteins that may include other nonprotein molecules). [GOC:go_curators]	IEA	molecular_function
CCBE1	ENSG00000183287	GO:0002040	sprouting angiogenesis	The extension of new blood vessels from existing capillaries into avascular tissues resulting from the proliferation of blood vessel endothelial cells. [PMID:16391003]	ISS	biological_process
CCBE1	ENSG00000183287	GO:0010595	positive regulation of endothelial cell migration	Any process that increases the rate, frequency, or extent of the orderly movement of an endothelial cell into the extracellular matrix to form an endothelium. [GOC:BHF, GOC:dph, GOC:tb]	IEA	biological_process
CCBE1	ENSG00000183287	GO:0001946	lymphangiogenesis	Lymph vessel formation when new vessels emerge from the proliferation of pre-existing vessels. [GOC:dph, PMID:11596157]	ISS	biological_process
CCBE1	ENSG00000183287	GO:0048845	venous blood vessel morphogenesis	The process in which the anatomical structures of venous blood vessels are generated and organized. Veins are blood vessels that transport blood from the body and its organs to the heart. [GOC:dsf, PMID:16740480]	ISS	biological_process
CCBE1	ENSG00000183287	GO:0031012	extracellular matrix	A structure lying external to one or more cells, which provides structural support for cells or tissues; may be completely external to the cell (as in animals and bacteria) or be part of the cell (as in plants). [GOC:mah]	IDA	cellular_component
CCBE1	ENSG00000183287	GO:0005581	collagen	Any of the various assemblies in which collagen chains form a left-handed triple helix; may assemble into higher order structures. [GOC:mah, ISBN:0721639976]	IEA	cellular_component
CCBE1	ENSG00000183287	GO:0005518	collagen binding	Interacting selectively and non-covalently with collagen, a group of fibrous proteins of very high tensile strength that form the main component of connective tissue in animals. Collagen is highly enriched in glycine (some regions are 33% glycine) and proline, occurring predominantly as 3-hydroxyproline (about 20%). [GOC:ai, ISBN:0198506732]	IDA	molecular_function
CCBE1	ENSG00000183287	GO:0005509	calcium ion binding	Interacting selectively and non-covalently with calcium ions (Ca2+). [GOC:ai]	IEA	molecular_function
CCBE1	ENSG00000183287	GO:0005515	protein binding	Interacting selectively and non-covalently with any protein or protein complex (a complex of two or more proteins that may include other nonprotein molecules). [GOC:go_curators]	IEA	molecular_function
CCBE1	ENSG00000183287	GO:0002040	sprouting angiogenesis	The extension of new blood vessels from existing capillaries into avascular tissues resulting from the proliferation of blood vessel endothelial cells. [PMID:16391003]	ISS	biological_process
CCBE1	ENSG00000183287	GO:0010595	positive regulation of endothelial cell migration	Any process that increases the rate, frequency, or extent of the orderly movement of an endothelial cell into the extracellular matrix to form an endothelium. [GOC:BHF, GOC:dph, GOC:tb]	IEA	biological_process
CCBE1	ENSG00000183287	GO:0001946	lymphangiogenesis	Lymph vessel formation when new vessels emerge from the proliferation of pre-existing vessels. [GOC:dph, PMID:11596157]	ISS	biological_process
CCBE1	ENSG00000183287	GO:0048845	venous blood vessel morphogenesis	The process in which the anatomical structures of venous blood vessels are generated and organized. Veins are blood vessels that transport blood from the body and its organs to the heart. [GOC:dsf, PMID:16740480]	ISS	biological_process
CCBE1	ENSG00000183287	GO:0031012	extracellular matrix	A structure lying external to one or more cells, which provides structural support for cells or tissues; may be completely external to the cell (as in animals and bacteria) or be part of the cell (as in plants). [GOC:mah]	IDA	cellular_component
CCBE1	ENSG00000183287	GO:0005581	collagen	Any of the various assemblies in which collagen chains form a left-handed triple helix; may assemble into higher order structures. [GOC:mah, ISBN:0721639976]	IEA	cellular_component
CCBE1	ENSG00000183287	GO:0005518	collagen binding	Interacting selectively and non-covalently with collagen, a group of fibrous proteins of very high tensile strength that form the main component of connective tissue in animals. Collagen is highly enriched in glycine (some regions are 33% glycine) and proline, occurring predominantly as 3-hydroxyproline (about 20%). [GOC:ai, ISBN:0198506732]	IDA	molecular_function
CCBE1	ENSG00000183287	GO:0005509	calcium ion binding	Interacting selectively and non-covalently with calcium ions (Ca2+). [GOC:ai]	IEA	molecular_function
CCBE1	ENSG00000183287	GO:0005515	protein binding	Interacting selectively and non-covalently with any protein or protein complex (a complex of two or more proteins that may include other nonprotein molecules). [GOC:go_curators]	IEA	molecular_function
CCBE1	ENSG00000183287	GO:0002040	sprouting angiogenesis	The extension of new blood vessels from existing capillaries into avascular tissues resulting from the proliferation of blood vessel endothelial cells. [PMID:16391003]	ISS	biological_process
CCBE1	ENSG00000183287	GO:0010595	positive regulation of endothelial cell migration	Any process that increases the rate, frequency, or extent of the orderly movement of an endothelial cell into the extracellular matrix to form an endothelium. [GOC:BHF, GOC:dph, GOC:tb]	IEA	biological_process
CCBE1	ENSG00000183287	-	-	-	-	-
CCBE1	ENSG00000183287	-	-	-	-	-
CCBE1	ENSG00000183287	-	-	-	-	-
CCBE1	ENSG00000183287	GO:0001946	lymphangiogenesis	Lymph vessel formation when new vessels emerge from the proliferation of pre-existing vessels. [GOC:dph, PMID:11596157]	ISS	biological_process
CCBE1	ENSG00000183287	GO:0048845	venous blood vessel morphogenesis	The process in which the anatomical structures of venous blood vessels are generated and organized. Veins are blood vessels that transport blood from the body and its organs to the heart. [GOC:dsf, PMID:16740480]	ISS	biological_process
CCBE1	ENSG00000183287	GO:0031012	extracellular matrix	A structure lying external to one or more cells, which provides structural support for cells or tissues; may be completely external to the cell (as in animals and bacteria) or be part of the cell (as in plants). [GOC:mah]	IDA	cellular_component
CCBE1	ENSG00000183287	GO:0005581	collagen	Any of the various assemblies in which collagen chains form a left-handed triple helix; may assemble into higher order structures. [GOC:mah, ISBN:0721639976]	IEA	cellular_component
CCBE1	ENSG00000183287	GO:0005518	collagen binding	Interacting selectively and non-covalently with collagen, a group of fibrous proteins of very high tensile strength that form the main component of connective tissue in animals. Collagen is highly enriched in glycine (some regions are 33% glycine) and proline, occurring predominantly as 3-hydroxyproline (about 20%). [GOC:ai, ISBN:0198506732]	IDA	molecular_function
CCBE1	ENSG00000183287	GO:0005509	calcium ion binding	Interacting selectively and non-covalently with calcium ions (Ca2+). [GOC:ai]	IEA	molecular_function
CCBE1	ENSG00000183287	GO:0002040	sprouting angiogenesis	The extension of new blood vessels from existing capillaries into avascular tissues resulting from the proliferation of blood vessel endothelial cells. [PMID:16391003]	ISS	biological_process
CCBE1	ENSG00000183287	GO:0001946	lymphangiogenesis	Lymph vessel formation when new vessels emerge from the proliferation of pre-existing vessels. [GOC:dph, PMID:11596157]	ISS	biological_process
CCBE1	ENSG00000183287	GO:0048845	venous blood vessel morphogenesis	The process in which the anatomical structures of venous blood vessels are generated and organized. Veins are blood vessels that transport blood from the body and its organs to the heart. [GOC:dsf, PMID:16740480]	ISS	biological_process
CCBE1	ENSG00000183287	GO:0031012	extracellular matrix	A structure lying external to one or more cells, which provides structural support for cells or tissues; may be completely external to the cell (as in animals and bacteria) or be part of the cell (as in plants). [GOC:mah]	IDA	cellular_component
CCBE1	ENSG00000183287	GO:0005581	collagen	Any of the various assemblies in which collagen chains form a left-handed triple helix; may assemble into higher order structures. [GOC:mah, ISBN:0721639976]	IEA	cellular_component
CCBE1	ENSG00000183287	GO:0005518	collagen binding	Interacting selectively and non-covalently with collagen, a group of fibrous proteins of very high tensile strength that form the main component of connective tissue in animals. Collagen is highly enriched in glycine (some regions are 33% glycine) and proline, occurring predominantly as 3-hydroxyproline (about 20%). [GOC:ai, ISBN:0198506732]	IDA	molecular_function
CCBE1	ENSG00000183287	GO:0005509	calcium ion binding	Interacting selectively and non-covalently with calcium ions (Ca2+). [GOC:ai]	IEA	molecular_function
CCBE1	ENSG00000183287	GO:0002040	sprouting angiogenesis	The extension of new blood vessels from existing capillaries into avascular tissues resulting from the proliferation of blood vessel endothelial cells. [PMID:16391003]	ISS	biological_process
CCBE1	ENSG00000183287	GO:0001946	lymphangiogenesis	Lymph vessel formation when new vessels emerge from the proliferation of pre-existing vessels. [GOC:dph, PMID:11596157]	ISS	biological_process
CCBE1	ENSG00000183287	GO:0048845	venous blood vessel morphogenesis	The process in which the anatomical structures of venous blood vessels are generated and organized. Veins are blood vessels that transport blood from the body and its organs to the heart. [GOC:dsf, PMID:16740480]	ISS	biological_process
CCBE1	ENSG00000183287	GO:0031012	extracellular matrix	A structure lying external to one or more cells, which provides structural support for cells or tissues; may be completely external to the cell (as in animals and bacteria) or be part of the cell (as in plants). [GOC:mah]	IDA	cellular_component
CCBE1	ENSG00000183287	GO:0005581	collagen	Any of the various assemblies in which collagen chains form a left-handed triple helix; may assemble into higher order structures. [GOC:mah, ISBN:0721639976]	IEA	cellular_component
CCBE1	ENSG00000183287	GO:0005518	collagen binding	Interacting selectively and non-covalently with collagen, a group of fibrous proteins of very high tensile strength that form the main component of connective tissue in animals. Collagen is highly enriched in glycine (some regions are 33% glycine) and proline, occurring predominantly as 3-hydroxyproline (about 20%). [GOC:ai, ISBN:0198506732]	IDA	molecular_function
CCBE1	ENSG00000183287	GO:0005509	calcium ion binding	Interacting selectively and non-covalently with calcium ions (Ca2+). [GOC:ai]	IEA	molecular_function
CCBE1	ENSG00000183287	GO:0002040	sprouting angiogenesis	The extension of new blood vessels from existing capillaries into avascular tissues resulting from the proliferation of blood vessel endothelial cells. [PMID:16391003]	ISS	biological_process
CCDC141	ENSG00000163492	GO:0005515	protein binding	Interacting selectively and non-covalently with any protein or protein complex (a complex of two or more proteins that may include other nonprotein molecules). [GOC:go_curators]	IPI	molecular_function
CCDC141	ENSG00000163492	GO:0005515	protein binding	Interacting selectively and non-covalently with any protein or protein complex (a complex of two or more proteins that may include other nonprotein molecules). [GOC:go_curators]	IEA	molecular_function
CCDC141	ENSG00000163492	GO:0005515	protein binding	Interacting selectively and non-covalently with any protein or protein complex (a complex of two or more proteins that may include other nonprotein molecules). [GOC:go_curators]	IEA	molecular_function
CCDC141	ENSG00000163492	GO:0000166	nucleotide binding	Interacting selectively and non-covalently with a nucleotide, any compound consisting of a nucleoside that is esterified with (ortho)phosphate or an oligophosphate at any hydroxyl group on the ribose or deoxyribose. [GOC:mah, ISBN:0198547684]	IEA	molecular_function
CCDC141	ENSG00000163492	GO:0005515	protein binding	Interacting selectively and non-covalently with any protein or protein complex (a complex of two or more proteins that may include other nonprotein molecules). [GOC:go_curators]	IEA	molecular_function
CCDC141	ENSG00000163492	GO:0005515	protein binding	Interacting selectively and non-covalently with any protein or protein complex (a complex of two or more proteins that may include other nonprotein molecules). [GOC:go_curators]	IEA	molecular_function
CCDC141	ENSG00000163492	GO:0005515	protein binding	Interacting selectively and non-covalently with any protein or protein complex (a complex of two or more proteins that may include other nonprotein molecules). [GOC:go_curators]	IPI	molecular_function
CCND3	ENSG00000112576	GO:0045737	positive regulation of cyclin-dependent protein kinase activity	Any process that activates or increases the frequency, rate or extent of CDK activity. [GOC:go_curators]	IDA	biological_process
CCND3	ENSG00000112576	GO:0042098	T cell proliferation	The expansion of a T cell population by cell division. Follows T cell activation. [GOC:jl]	IEA	biological_process
CCND3	ENSG00000112576	GO:0004693	cyclin-dependent protein serine/threonine kinase activity	Catalysis of the reactions: ATP + protein serine = ADP + protein serine phosphate, and ATP + protein threonine = ADP + protein threonine phosphate. This reaction requires the binding of a regulatory cyclin subunit and full activity requires stimulatory phosphorylation by a CDK-activating kinase (CAK). [GOC:pr, GOC:rn, PMID:7877684, PMID:9841670]	IEA	molecular_function
CCND3	ENSG00000112576	GO:0000307	cyclin-dependent protein kinase holoenzyme complex	Cyclin-dependent protein kinases (CDKs) are heterodimeric enzymes that contain a kinase catalytic subunit associated with a regulatory cyclin partner. [GOC:krc, PMID:11602261]	IDA	cellular_component
CCND3	ENSG00000112576	GO:0000079	regulation of cyclin-dependent protein serine/threonine kinase activity	Any process that modulates the frequency, rate or extent of cyclin-dependent protein serine/threonine kinase activity. [GOC:go_curators, GOC:pr]	IEA	biological_process
CCND3	ENSG00000112576	GO:0001934	positive regulation of protein phosphorylation	Any process that activates or increases the frequency, rate or extent of addition of phosphate groups to amino acids within a protein. [GOC:hjd]	IDA	biological_process
CCND3	ENSG00000112576	GO:0051726	regulation of cell cycle	Any process that modulates the rate or extent of progression through the cell cycle. [GOC:ai, GOC:dph, GOC:tb]	IEA	biological_process
CCND3	ENSG00000112576	GO:0019901	protein kinase binding	Interacting selectively and non-covalently with a protein kinase, any enzyme that catalyzes the transfer of a phosphate group, usually from ATP, to a protein substrate. [GOC:jl]	IPI	molecular_function
CCND3	ENSG00000112576	GO:0007165	signal transduction	The cellular process in which a signal is conveyed to trigger a change in the activity or state of a cell. Signal transduction begins with reception of a signal (e.g. a ligand binding to a receptor or receptor activation by a stimulus such as light), or for signal transduction in the absence of ligand, signal-withdrawal or the activity of a constitutively active receptor. Signal transduction ends…	IEA	biological_process
CCND3	ENSG00000112576	GO:0051301	cell division	The process resulting in the physical partitioning and separation of a cell into daughter cells. [GOC:go_curators]	IEA	biological_process
CCND3	ENSG00000112576	GO:0016020	membrane	Double layer of lipid molecules that encloses all cells, and, in eukaryotes, many organelles; may be a single or double lipid bilayer; also includes associated proteins. [GOC:mah, ISBN:0815316194]	IEA	cellular_component
CCND3	ENSG00000112576	GO:0005737	cytoplasm	All of the contents of a cell excluding the plasma membrane and nucleus, but including other subcellular structures. [ISBN:0198547684]	IEA	cellular_component
CCND3	ENSG00000112576	GO:0005515	protein binding	Interacting selectively and non-covalently with any protein or protein complex (a complex of two or more proteins that may include other nonprotein molecules). [GOC:go_curators]	IPI	molecular_function
CCND3	ENSG00000112576	GO:0005634	nucleus	A membrane-bounded organelle of eukaryotic cells in which chromosomes are housed and replicated. In most cells, the nucleus contains all of the cell's chromosomes except the organellar chromosomes, and is the site of RNA synthesis and processing. In some species, or in specialized cell types, RNA metabolism or DNA replication may be absent. [GOC:go_curators]	IEA	cellular_component
CCND3	ENSG00000112576	GO:0005515	protein binding	Interacting selectively and non-covalently with any protein or protein complex (a complex of two or more proteins that may include other nonprotein molecules). [GOC:go_curators]	IEA	molecular_function
CCND3	ENSG00000112576	GO:0045737	positive regulation of cyclin-dependent protein kinase activity	Any process that activates or increases the frequency, rate or extent of CDK activity. [GOC:go_curators]	IDA	biological_process
CCND3	ENSG00000112576	GO:0042098	T cell proliferation	The expansion of a T cell population by cell division. Follows T cell activation. [GOC:jl]	IEA	biological_process
CCND3	ENSG00000112576	GO:0004693	cyclin-dependent protein serine/threonine kinase activity	Catalysis of the reactions: ATP + protein serine = ADP + protein serine phosphate, and ATP + protein threonine = ADP + protein threonine phosphate. This reaction requires the binding of a regulatory cyclin subunit and full activity requires stimulatory phosphorylation by a CDK-activating kinase (CAK). [GOC:pr, GOC:rn, PMID:7877684, PMID:9841670]	IEA	molecular_function
CCND3	ENSG00000112576	GO:0000307	cyclin-dependent protein kinase holoenzyme complex	Cyclin-dependent protein kinases (CDKs) are heterodimeric enzymes that contain a kinase catalytic subunit associated with a regulatory cyclin partner. [GOC:krc, PMID:11602261]	IDA	cellular_component
CCND3	ENSG00000112576	GO:0001934	positive regulation of protein phosphorylation	Any process that activates or increases the frequency, rate or extent of addition of phosphate groups to amino acids within a protein. [GOC:hjd]	IDA	biological_process
CCND3	ENSG00000112576	GO:0051726	regulation of cell cycle	Any process that modulates the rate or extent of progression through the cell cycle. [GOC:ai, GOC:dph, GOC:tb]	IEA	biological_process
CCND3	ENSG00000112576	GO:0019901	protein kinase binding	Interacting selectively and non-covalently with a protein kinase, any enzyme that catalyzes the transfer of a phosphate group, usually from ATP, to a protein substrate. [GOC:jl]	IPI	molecular_function
CCND3	ENSG00000112576	GO:0007165	signal transduction	The cellular process in which a signal is conveyed to trigger a change in the activity or state of a cell. Signal transduction begins with reception of a signal (e.g. a ligand binding to a receptor or receptor activation by a stimulus such as light), or for signal transduction in the absence of ligand, signal-withdrawal or the activity of a constitutively active receptor. Signal transduction ends…	IEA	biological_process
CCND3	ENSG00000112576	GO:0051301	cell division	The process resulting in the physical partitioning and separation of a cell into daughter cells. [GOC:go_curators]	IEA	biological_process
CCND3	ENSG00000112576	GO:0016020	membrane	Double layer of lipid molecules that encloses all cells, and, in eukaryotes, many organelles; may be a single or double lipid bilayer; also includes associated proteins. [GOC:mah, ISBN:0815316194]	IEA	cellular_component
CCND3	ENSG00000112576	GO:0005737	cytoplasm	All of the contents of a cell excluding the plasma membrane and nucleus, but including other subcellular structures. [ISBN:0198547684]	IEA	cellular_component
CCND3	ENSG00000112576	GO:0005515	protein binding	Interacting selectively and non-covalently with any protein or protein complex (a complex of two or more proteins that may include other nonprotein molecules). [GOC:go_curators]	IPI	molecular_function
CCND3	ENSG00000112576	GO:0005634	nucleus	A membrane-bounded organelle of eukaryotic cells in which chromosomes are housed and replicated. In most cells, the nucleus contains all of the cell's chromosomes except the organellar chromosomes, and is the site of RNA synthesis and processing. In some species, or in specialized cell types, RNA metabolism or DNA replication may be absent. [GOC:go_curators]	IEA	cellular_component
CCND3	ENSG00000112576	GO:0042098	T cell proliferation	The expansion of a T cell population by cell division. Follows T cell activation. [GOC:jl]	IEA	biological_process
CCND3	ENSG00000112576	GO:0004693	cyclin-dependent protein serine/threonine kinase activity	Catalysis of the reactions: ATP + protein serine = ADP + protein serine phosphate, and ATP + protein threonine = ADP + protein threonine phosphate. This reaction requires the binding of a regulatory cyclin subunit and full activity requires stimulatory phosphorylation by a CDK-activating kinase (CAK). [GOC:pr, GOC:rn, PMID:7877684, PMID:9841670]	IEA	molecular_function
CCND3	ENSG00000112576	GO:0051726	regulation of cell cycle	Any process that modulates the rate or extent of progression through the cell cycle. [GOC:ai, GOC:dph, GOC:tb]	IEA	biological_process
CCND3	ENSG00000112576	GO:0007165	signal transduction	The cellular process in which a signal is conveyed to trigger a change in the activity or state of a cell. Signal transduction begins with reception of a signal (e.g. a ligand binding to a receptor or receptor activation by a stimulus such as light), or for signal transduction in the absence of ligand, signal-withdrawal or the activity of a constitutively active receptor. Signal transduction ends…	IEA	biological_process
CCND3	ENSG00000112576	GO:0005634	nucleus	A membrane-bounded organelle of eukaryotic cells in which chromosomes are housed and replicated. In most cells, the nucleus contains all of the cell's chromosomes except the organellar chromosomes, and is the site of RNA synthesis and processing. In some species, or in specialized cell types, RNA metabolism or DNA replication may be absent. [GOC:go_curators]	IEA	cellular_component
CCND3	ENSG00000112576	GO:0045737	positive regulation of cyclin-dependent protein kinase activity	Any process that activates or increases the frequency, rate or extent of CDK activity. [GOC:go_curators]	IDA	biological_process
CCND3	ENSG00000112576	GO:0042098	T cell proliferation	The expansion of a T cell population by cell division. Follows T cell activation. [GOC:jl]	IEA	biological_process
CCND3	ENSG00000112576	GO:0004693	cyclin-dependent protein serine/threonine kinase activity	Catalysis of the reactions: ATP + protein serine = ADP + protein serine phosphate, and ATP + protein threonine = ADP + protein threonine phosphate. This reaction requires the binding of a regulatory cyclin subunit and full activity requires stimulatory phosphorylation by a CDK-activating kinase (CAK). [GOC:pr, GOC:rn, PMID:7877684, PMID:9841670]	IEA	molecular_function
CCND3	ENSG00000112576	GO:0000307	cyclin-dependent protein kinase holoenzyme complex	Cyclin-dependent protein kinases (CDKs) are heterodimeric enzymes that contain a kinase catalytic subunit associated with a regulatory cyclin partner. [GOC:krc, PMID:11602261]	IDA	cellular_component
CCND3	ENSG00000112576	GO:0001934	positive regulation of protein phosphorylation	Any process that activates or increases the frequency, rate or extent of addition of phosphate groups to amino acids within a protein. [GOC:hjd]	IDA	biological_process
CCND3	ENSG00000112576	GO:0019901	protein kinase binding	Interacting selectively and non-covalently with a protein kinase, any enzyme that catalyzes the transfer of a phosphate group, usually from ATP, to a protein substrate. [GOC:jl]	IPI	molecular_function
CCND3	ENSG00000112576	GO:0007165	signal transduction	The cellular process in which a signal is conveyed to trigger a change in the activity or state of a cell. Signal transduction begins with reception of a signal (e.g. a ligand binding to a receptor or receptor activation by a stimulus such as light), or for signal transduction in the absence of ligand, signal-withdrawal or the activity of a constitutively active receptor. Signal transduction ends…	IEA	biological_process
CCND3	ENSG00000112576	GO:0051301	cell division	The process resulting in the physical partitioning and separation of a cell into daughter cells. [GOC:go_curators]	IEA	biological_process
CCND3	ENSG00000112576	GO:0016020	membrane	Double layer of lipid molecules that encloses all cells, and, in eukaryotes, many organelles; may be a single or double lipid bilayer; also includes associated proteins. [GOC:mah, ISBN:0815316194]	IEA	cellular_component
CCND3	ENSG00000112576	GO:0005737	cytoplasm	All of the contents of a cell excluding the plasma membrane and nucleus, but including other subcellular structures. [ISBN:0198547684]	IEA	cellular_component
CCND3	ENSG00000112576	GO:0005515	protein binding	Interacting selectively and non-covalently with any protein or protein complex (a complex of two or more proteins that may include other nonprotein molecules). [GOC:go_curators]	IPI	molecular_function
CCND3	ENSG00000112576	GO:0005634	nucleus	A membrane-bounded organelle of eukaryotic cells in which chromosomes are housed and replicated. In most cells, the nucleus contains all of the cell's chromosomes except the organellar chromosomes, and is the site of RNA synthesis and processing. In some species, or in specialized cell types, RNA metabolism or DNA replication may be absent. [GOC:go_curators]	IEA	cellular_component
CCND3	ENSG00000112576	GO:0045737	positive regulation of cyclin-dependent protein kinase activity	Any process that activates or increases the frequency, rate or extent of CDK activity. [GOC:go_curators]	IDA	biological_process
CCND3	ENSG00000112576	GO:0042098	T cell proliferation	The expansion of a T cell population by cell division. Follows T cell activation. [GOC:jl]	IEA	biological_process
CCND3	ENSG00000112576	GO:0004693	cyclin-dependent protein serine/threonine kinase activity	Catalysis of the reactions: ATP + protein serine = ADP + protein serine phosphate, and ATP + protein threonine = ADP + protein threonine phosphate. This reaction requires the binding of a regulatory cyclin subunit and full activity requires stimulatory phosphorylation by a CDK-activating kinase (CAK). [GOC:pr, GOC:rn, PMID:7877684, PMID:9841670]	IEA	molecular_function
CCND3	ENSG00000112576	GO:0000307	cyclin-dependent protein kinase holoenzyme complex	Cyclin-dependent protein kinases (CDKs) are heterodimeric enzymes that contain a kinase catalytic subunit associated with a regulatory cyclin partner. [GOC:krc, PMID:11602261]	IDA	cellular_component
CCND3	ENSG00000112576	GO:0001934	positive regulation of protein phosphorylation	Any process that activates or increases the frequency, rate or extent of addition of phosphate groups to amino acids within a protein. [GOC:hjd]	IDA	biological_process
CCND3	ENSG00000112576	GO:0051726	regulation of cell cycle	Any process that modulates the rate or extent of progression through the cell cycle. [GOC:ai, GOC:dph, GOC:tb]	IEA	biological_process
CCND3	ENSG00000112576	GO:0019901	protein kinase binding	Interacting selectively and non-covalently with a protein kinase, any enzyme that catalyzes the transfer of a phosphate group, usually from ATP, to a protein substrate. [GOC:jl]	IPI	molecular_function
CCND3	ENSG00000112576	GO:0007165	signal transduction	The cellular process in which a signal is conveyed to trigger a change in the activity or state of a cell. Signal transduction begins with reception of a signal (e.g. a ligand binding to a receptor or receptor activation by a stimulus such as light), or for signal transduction in the absence of ligand, signal-withdrawal or the activity of a constitutively active receptor. Signal transduction ends…	IEA	biological_process
CCND3	ENSG00000112576	GO:0051301	cell division	The process resulting in the physical partitioning and separation of a cell into daughter cells. [GOC:go_curators]	IEA	biological_process
CCND3	ENSG00000112576	GO:0016020	membrane	Double layer of lipid molecules that encloses all cells, and, in eukaryotes, many organelles; may be a single or double lipid bilayer; also includes associated proteins. [GOC:mah, ISBN:0815316194]	IEA	cellular_component
CCND3	ENSG00000112576	GO:0005737	cytoplasm	All of the contents of a cell excluding the plasma membrane and nucleus, but including other subcellular structures. [ISBN:0198547684]	IEA	cellular_component
CCND3	ENSG00000112576	GO:0005515	protein binding	Interacting selectively and non-covalently with any protein or protein complex (a complex of two or more proteins that may include other nonprotein molecules). [GOC:go_curators]	IPI	molecular_function
CCND3	ENSG00000112576	GO:0005634	nucleus	A membrane-bounded organelle of eukaryotic cells in which chromosomes are housed and replicated. In most cells, the nucleus contains all of the cell's chromosomes except the organellar chromosomes, and is the site of RNA synthesis and processing. In some species, or in specialized cell types, RNA metabolism or DNA replication may be absent. [GOC:go_curators]	IEA	cellular_component
CCND3	ENSG00000112576	GO:0045737	positive regulation of cyclin-dependent protein kinase activity	Any process that activates or increases the frequency, rate or extent of CDK activity. [GOC:go_curators]	IDA	biological_process
CCND3	ENSG00000112576	GO:0042098	T cell proliferation	The expansion of a T cell population by cell division. Follows T cell activation. [GOC:jl]	IEA	biological_process
CCND3	ENSG00000112576	GO:0004693	cyclin-dependent protein serine/threonine kinase activity	Catalysis of the reactions: ATP + protein serine = ADP + protein serine phosphate, and ATP + protein threonine = ADP + protein threonine phosphate. This reaction requires the binding of a regulatory cyclin subunit and full activity requires stimulatory phosphorylation by a CDK-activating kinase (CAK). [GOC:pr, GOC:rn, PMID:7877684, PMID:9841670]	IEA	molecular_function
CCND3	ENSG00000112576	GO:0000307	cyclin-dependent protein kinase holoenzyme complex	Cyclin-dependent protein kinases (CDKs) are heterodimeric enzymes that contain a kinase catalytic subunit associated with a regulatory cyclin partner. [GOC:krc, PMID:11602261]	IDA	cellular_component
CCND3	ENSG00000112576	GO:0001934	positive regulation of protein phosphorylation	Any process that activates or increases the frequency, rate or extent of addition of phosphate groups to amino acids within a protein. [GOC:hjd]	IDA	biological_process
CCND3	ENSG00000112576	GO:0019901	protein kinase binding	Interacting selectively and non-covalently with a protein kinase, any enzyme that catalyzes the transfer of a phosphate group, usually from ATP, to a protein substrate. [GOC:jl]	IPI	molecular_function
CCND3	ENSG00000112576	GO:0007165	signal transduction	The cellular process in which a signal is conveyed to trigger a change in the activity or state of a cell. Signal transduction begins with reception of a signal (e.g. a ligand binding to a receptor or receptor activation by a stimulus such as light), or for signal transduction in the absence of ligand, signal-withdrawal or the activity of a constitutively active receptor. Signal transduction ends…	IEA	biological_process
CCND3	ENSG00000112576	GO:0051301	cell division	The process resulting in the physical partitioning and separation of a cell into daughter cells. [GOC:go_curators]	IEA	biological_process
CCND3	ENSG00000112576	GO:0016020	membrane	Double layer of lipid molecules that encloses all cells, and, in eukaryotes, many organelles; may be a single or double lipid bilayer; also includes associated proteins. [GOC:mah, ISBN:0815316194]	IEA	cellular_component
CCND3	ENSG00000112576	GO:0005737	cytoplasm	All of the contents of a cell excluding the plasma membrane and nucleus, but including other subcellular structures. [ISBN:0198547684]	IEA	cellular_component
CCND3	ENSG00000112576	GO:0005515	protein binding	Interacting selectively and non-covalently with any protein or protein complex (a complex of two or more proteins that may include other nonprotein molecules). [GOC:go_curators]	IPI	molecular_function
CCND3	ENSG00000112576	GO:0005634	nucleus	A membrane-bounded organelle of eukaryotic cells in which chromosomes are housed and replicated. In most cells, the nucleus contains all of the cell's chromosomes except the organellar chromosomes, and is the site of RNA synthesis and processing. In some species, or in specialized cell types, RNA metabolism or DNA replication may be absent. [GOC:go_curators]	IEA	cellular_component
CCND3	ENSG00000112576	GO:0042098	T cell proliferation	The expansion of a T cell population by cell division. Follows T cell activation. [GOC:jl]	IEA	biological_process
CCND3	ENSG00000112576	GO:0004693	cyclin-dependent protein serine/threonine kinase activity	Catalysis of the reactions: ATP + protein serine = ADP + protein serine phosphate, and ATP + protein threonine = ADP + protein threonine phosphate. This reaction requires the binding of a regulatory cyclin subunit and full activity requires stimulatory phosphorylation by a CDK-activating kinase (CAK). [GOC:pr, GOC:rn, PMID:7877684, PMID:9841670]	IEA	molecular_function
CCND3	ENSG00000112576	GO:0051726	regulation of cell cycle	Any process that modulates the rate or extent of progression through the cell cycle. [GOC:ai, GOC:dph, GOC:tb]	IEA	biological_process
CCND3	ENSG00000112576	GO:0007165	signal transduction	The cellular process in which a signal is conveyed to trigger a change in the activity or state of a cell. Signal transduction begins with reception of a signal (e.g. a ligand binding to a receptor or receptor activation by a stimulus such as light), or for signal transduction in the absence of ligand, signal-withdrawal or the activity of a constitutively active receptor. Signal transduction ends…	IEA	biological_process
CCND3	ENSG00000112576	GO:0042098	T cell proliferation	The expansion of a T cell population by cell division. Follows T cell activation. [GOC:jl]	IEA	biological_process
CCND3	ENSG00000112576	GO:0004693	cyclin-dependent protein serine/threonine kinase activity	Catalysis of the reactions: ATP + protein serine = ADP + protein serine phosphate, and ATP + protein threonine = ADP + protein threonine phosphate. This reaction requires the binding of a regulatory cyclin subunit and full activity requires stimulatory phosphorylation by a CDK-activating kinase (CAK). [GOC:pr, GOC:rn, PMID:7877684, PMID:9841670]	IEA	molecular_function
CCND3	ENSG00000112576	GO:0051726	regulation of cell cycle	Any process that modulates the rate or extent of progression through the cell cycle. [GOC:ai, GOC:dph, GOC:tb]	IEA	biological_process
CCND3	ENSG00000112576	GO:0007165	signal transduction	The cellular process in which a signal is conveyed to trigger a change in the activity or state of a cell. Signal transduction begins with reception of a signal (e.g. a ligand binding to a receptor or receptor activation by a stimulus such as light), or for signal transduction in the absence of ligand, signal-withdrawal or the activity of a constitutively active receptor. Signal transduction ends…	IEA	biological_process
CCND3	ENSG00000112576	GO:0005634	nucleus	A membrane-bounded organelle of eukaryotic cells in which chromosomes are housed and replicated. In most cells, the nucleus contains all of the cell's chromosomes except the organellar chromosomes, and is the site of RNA synthesis and processing. In some species, or in specialized cell types, RNA metabolism or DNA replication may be absent. [GOC:go_curators]	IEA	cellular_component
CCND3	ENSG00000112576	-	-	-	-	-
CCND3	ENSG00000112576	GO:0042098	T cell proliferation	The expansion of a T cell population by cell division. Follows T cell activation. [GOC:jl]	IEA	biological_process
CCND3	ENSG00000112576	GO:0004693	cyclin-dependent protein serine/threonine kinase activity	Catalysis of the reactions: ATP + protein serine = ADP + protein serine phosphate, and ATP + protein threonine = ADP + protein threonine phosphate. This reaction requires the binding of a regulatory cyclin subunit and full activity requires stimulatory phosphorylation by a CDK-activating kinase (CAK). [GOC:pr, GOC:rn, PMID:7877684, PMID:9841670]	IEA	molecular_function
CCND3	ENSG00000112576	GO:0051726	regulation of cell cycle	Any process that modulates the rate or extent of progression through the cell cycle. [GOC:ai, GOC:dph, GOC:tb]	IEA	biological_process
CCND3	ENSG00000112576	GO:0007165	signal transduction	The cellular process in which a signal is conveyed to trigger a change in the activity or state of a cell. Signal transduction begins with reception of a signal (e.g. a ligand binding to a receptor or receptor activation by a stimulus such as light), or for signal transduction in the absence of ligand, signal-withdrawal or the activity of a constitutively active receptor. Signal transduction ends…	IEA	biological_process
CCND3	ENSG00000112576	GO:0042098	T cell proliferation	The expansion of a T cell population by cell division. Follows T cell activation. [GOC:jl]	IEA	biological_process
CCND3	ENSG00000112576	GO:0004693	cyclin-dependent protein serine/threonine kinase activity	Catalysis of the reactions: ATP + protein serine = ADP + protein serine phosphate, and ATP + protein threonine = ADP + protein threonine phosphate. This reaction requires the binding of a regulatory cyclin subunit and full activity requires stimulatory phosphorylation by a CDK-activating kinase (CAK). [GOC:pr, GOC:rn, PMID:7877684, PMID:9841670]	IEA	molecular_function
CCND3	ENSG00000112576	GO:0051726	regulation of cell cycle	Any process that modulates the rate or extent of progression through the cell cycle. [GOC:ai, GOC:dph, GOC:tb]	IEA	biological_process
CCND3	ENSG00000112576	GO:0007165	signal transduction	The cellular process in which a signal is conveyed to trigger a change in the activity or state of a cell. Signal transduction begins with reception of a signal (e.g. a ligand binding to a receptor or receptor activation by a stimulus such as light), or for signal transduction in the absence of ligand, signal-withdrawal or the activity of a constitutively active receptor. Signal transduction ends…	IEA	biological_process
CCND3	ENSG00000112576	-	-	-	-	-
CSNK1A1	ENSG00000113712	GO:0016772	transferase activity, transferring phosphorus-containing groups	Catalysis of the transfer of a phosphorus-containing group from one compound (donor) to another (acceptor). [GOC:jl, ISBN:0198506732]	IEA	molecular_function
CSNK1A1	ENSG00000113712	GO:0004713	protein tyrosine kinase activity	Catalysis of the reaction: ATP + a protein tyrosine = ADP + protein tyrosine phosphate. [EC:2.7.10]	IEA	molecular_function
CSNK1A1	ENSG00000113712	GO:0006468	protein phosphorylation	The process of introducing a phosphate group on to a protein. [GOC:hb]	IEA	biological_process
CSNK1A1	ENSG00000113712	GO:0004672	protein kinase activity	Catalysis of the phosphorylation of an amino acid residue in a protein, usually according to the reaction: a protein + ATP = a phosphoprotein + ADP. [MetaCyc:PROTEIN-KINASE-RXN]	IEA	molecular_function
CSNK1A1	ENSG00000113712	GO:0004674	protein serine/threonine kinase activity	Catalysis of the reactions: ATP + protein serine = ADP + protein serine phosphate, and ATP + protein threonine = ADP + protein threonine phosphate. [GOC:bf]	IEA	molecular_function
CSNK1A1	ENSG00000113712	GO:0005524	ATP binding	Interacting selectively and non-covalently with ATP, adenosine 5'-triphosphate, a universally important coenzyme and enzyme regulator. [ISBN:0198506732]	IEA	molecular_function
CSNK1A1	ENSG00000113712	GO:0016772	transferase activity, transferring phosphorus-containing groups	Catalysis of the transfer of a phosphorus-containing group from one compound (donor) to another (acceptor). [GOC:jl, ISBN:0198506732]	IEA	molecular_function
CSNK1A1	ENSG00000113712	GO:0006468	protein phosphorylation	The process of introducing a phosphate group on to a protein. [GOC:hb]	IEA	biological_process
CSNK1A1	ENSG00000113712	GO:0004672	protein kinase activity	Catalysis of the phosphorylation of an amino acid residue in a protein, usually according to the reaction: a protein + ATP = a phosphoprotein + ADP. [MetaCyc:PROTEIN-KINASE-RXN]	IEA	molecular_function
CSNK1A1	ENSG00000113712	GO:0004674	protein serine/threonine kinase activity	Catalysis of the reactions: ATP + protein serine = ADP + protein serine phosphate, and ATP + protein threonine = ADP + protein threonine phosphate. [GOC:bf]	IEA	molecular_function
CSNK1A1	ENSG00000113712	GO:0005524	ATP binding	Interacting selectively and non-covalently with ATP, adenosine 5'-triphosphate, a universally important coenzyme and enzyme regulator. [ISBN:0198506732]	IEA	molecular_function
CSNK1A1	ENSG00000113712	GO:0016772	transferase activity, transferring phosphorus-containing groups	Catalysis of the transfer of a phosphorus-containing group from one compound (donor) to another (acceptor). [GOC:jl, ISBN:0198506732]	IEA	molecular_function
CSNK1A1	ENSG00000113712	GO:0006468	protein phosphorylation	The process of introducing a phosphate group on to a protein. [GOC:hb]	IEA	biological_process
CSNK1A1	ENSG00000113712	GO:0004672	protein kinase activity	Catalysis of the phosphorylation of an amino acid residue in a protein, usually according to the reaction: a protein + ATP = a phosphoprotein + ADP. [MetaCyc:PROTEIN-KINASE-RXN]	IEA	molecular_function
CSNK1A1	ENSG00000113712	GO:0004674	protein serine/threonine kinase activity	Catalysis of the reactions: ATP + protein serine = ADP + protein serine phosphate, and ATP + protein threonine = ADP + protein threonine phosphate. [GOC:bf]	IEA	molecular_function
CSNK1A1	ENSG00000113712	GO:0005524	ATP binding	Interacting selectively and non-covalently with ATP, adenosine 5'-triphosphate, a universally important coenzyme and enzyme regulator. [ISBN:0198506732]	IEA	molecular_function
CSNK1A1	ENSG00000113712	GO:0016772	transferase activity, transferring phosphorus-containing groups	Catalysis of the transfer of a phosphorus-containing group from one compound (donor) to another (acceptor). [GOC:jl, ISBN:0198506732]	IEA	molecular_function
CSNK1A1	ENSG00000113712	GO:0005847	mRNA cleavage and polyadenylation specificity factor complex	A multisubunit complex that binds to the canonical AAUAAA hexamer and to U-rich upstream sequence elements on the pre-mRNA, thereby stimulating the otherwise weakly active and nonspecific polymerase to elongate efficiently RNAs containing a poly(A) signal. [PMID:14749727]	IDA	cellular_component
CSNK1A1	ENSG00000113712	GO:0016607	nuclear speck	A discrete extra-nucleolar subnuclear domain, 20-50 in number, in which splicing factors are seen to be localized by immunofluorescence microscopy. [http://www.cellnucleus.com/]	IDA	cellular_component
CSNK1A1	ENSG00000113712	GO:0016772	transferase activity, transferring phosphorus-containing groups	Catalysis of the transfer of a phosphorus-containing group from one compound (donor) to another (acceptor). [GOC:jl, ISBN:0198506732]	IEA	molecular_function
CSNK1A1	ENSG00000113712	GO:0007166	cell surface receptor signaling pathway	A series of molecular signals initiated by activation of a receptor on the surface of a cell. The pathway begins with binding of an extracellular ligand to a cell surface receptor, or for receptors that signal in the absence of a ligand, by ligand-withdrawal or the activity of a constitutively active receptor. The pathway ends with regulation of a downstream cellular process, e.g. transcription. …	TAS	biological_process
CSNK1A1	ENSG00000113712	GO:0000777	condensed chromosome kinetochore	A multisubunit complex that is located at the centromeric region of a condensed chromosome and provides an attachment point for the spindle microtubules. [GOC:elh]	IEA	cellular_component
CSNK1A1	ENSG00000113712	GO:0006468	protein phosphorylation	The process of introducing a phosphate group on to a protein. [GOC:hb]	IDA	biological_process
CSNK1A1	ENSG00000113712	GO:0016055	Wnt signaling pathway	The series of molecular signals initiated by binding of a Wnt protein to a frizzled family receptor on the surface of the target cell and ending with a change in cell state. [GOC:dph, GOC:go_curators, PMID:11532397]	IEA	biological_process
CSNK1A1	ENSG00000113712	GO:0005813	centrosome	A structure comprised of a core structure (in most organisms, a pair of centrioles) and peripheral material from which a microtubule-based structure, such as a spindle apparatus, is organized. Centrosomes occur close to the nucleus during interphase in many eukaryotic cells, though in animal cells it changes continually during the cell-division cycle. [GOC:mah, ISBN:0198547684]	IDA	cellular_component
CSNK1A1	ENSG00000113712	GO:0007165	signal transduction	The cellular process in which a signal is conveyed to trigger a change in the activity or state of a cell. Signal transduction begins with reception of a signal (e.g. a ligand binding to a receptor or receptor activation by a stimulus such as light), or for signal transduction in the absence of ligand, signal-withdrawal or the activity of a constitutively active receptor. Signal transduction ends…	NAS	biological_process
CSNK1A1	ENSG00000113712	GO:0004672	protein kinase activity	Catalysis of the phosphorylation of an amino acid residue in a protein, usually according to the reaction: a protein + ATP = a phosphoprotein + ADP. [MetaCyc:PROTEIN-KINASE-RXN]	TAS	molecular_function
CSNK1A1	ENSG00000113712	GO:0004674	protein serine/threonine kinase activity	Catalysis of the reactions: ATP + protein serine = ADP + protein serine phosphate, and ATP + protein threonine = ADP + protein threonine phosphate. [GOC:bf]	IDA	molecular_function
CSNK1A1	ENSG00000113712	GO:0007067	mitosis	A cell cycle process comprising the steps by which the nucleus of a eukaryotic cell divides; the process involves condensation of chromosomal DNA into a highly compacted form. Canonically, mitosis produces two daughter nuclei whose chromosome complement is identical to that of the mother cell. [GOC:dph, GOC:ma, GOC:mah, ISBN:0198547684]	IEA	biological_process
CSNK1A1	ENSG00000113712	GO:0005829	cytosol	The part of the cytoplasm that does not contain organelles but which does contain other particulate matter, such as protein complexes. [GOC:hgd, GOC:jl]	TAS	cellular_component
CSNK1A1	ENSG00000113712	GO:0005524	ATP binding	Interacting selectively and non-covalently with ATP, adenosine 5'-triphosphate, a universally important coenzyme and enzyme regulator. [ISBN:0198506732]	IEA	molecular_function
CSNK1A1	ENSG00000113712	GO:0005515	protein binding	Interacting selectively and non-covalently with any protein or protein complex (a complex of two or more proteins that may include other nonprotein molecules). [GOC:go_curators]	IPI	molecular_function
CSNK1A1	ENSG00000113712	GO:0016772	transferase activity, transferring phosphorus-containing groups	Catalysis of the transfer of a phosphorus-containing group from one compound (donor) to another (acceptor). [GOC:jl, ISBN:0198506732]	IEA	molecular_function
CSNK1A1	ENSG00000113712	GO:0006468	protein phosphorylation	The process of introducing a phosphate group on to a protein. [GOC:hb]	IEA	biological_process
CSNK1A1	ENSG00000113712	GO:0004672	protein kinase activity	Catalysis of the phosphorylation of an amino acid residue in a protein, usually according to the reaction: a protein + ATP = a phosphoprotein + ADP. [MetaCyc:PROTEIN-KINASE-RXN]	IEA	molecular_function
CSNK1A1	ENSG00000113712	GO:0005524	ATP binding	Interacting selectively and non-covalently with ATP, adenosine 5'-triphosphate, a universally important coenzyme and enzyme regulator. [ISBN:0198506732]	IEA	molecular_function
CSNK1A1	ENSG00000113712	GO:0016772	transferase activity, transferring phosphorus-containing groups	Catalysis of the transfer of a phosphorus-containing group from one compound (donor) to another (acceptor). [GOC:jl, ISBN:0198506732]	IEA	molecular_function
CSNK1A1	ENSG00000113712	GO:0006468	protein phosphorylation	The process of introducing a phosphate group on to a protein. [GOC:hb]	IEA	biological_process
CSNK1A1	ENSG00000113712	GO:0004672	protein kinase activity	Catalysis of the phosphorylation of an amino acid residue in a protein, usually according to the reaction: a protein + ATP = a phosphoprotein + ADP. [MetaCyc:PROTEIN-KINASE-RXN]	IEA	molecular_function
CSNK1A1	ENSG00000113712	GO:0005524	ATP binding	Interacting selectively and non-covalently with ATP, adenosine 5'-triphosphate, a universally important coenzyme and enzyme regulator. [ISBN:0198506732]	IEA	molecular_function
CSNK1A1	ENSG00000113712	GO:0016772	transferase activity, transferring phosphorus-containing groups	Catalysis of the transfer of a phosphorus-containing group from one compound (donor) to another (acceptor). [GOC:jl, ISBN:0198506732]	IEA	molecular_function
CSNK1A1	ENSG00000113712	GO:0016772	transferase activity, transferring phosphorus-containing groups	Catalysis of the transfer of a phosphorus-containing group from one compound (donor) to another (acceptor). [GOC:jl, ISBN:0198506732]	IEA	molecular_function
CSNK1A1	ENSG00000113712	GO:0006468	protein phosphorylation	The process of introducing a phosphate group on to a protein. [GOC:hb]	IEA	biological_process
CSNK1A1	ENSG00000113712	GO:0004672	protein kinase activity	Catalysis of the phosphorylation of an amino acid residue in a protein, usually according to the reaction: a protein + ATP = a phosphoprotein + ADP. [MetaCyc:PROTEIN-KINASE-RXN]	IEA	molecular_function
CSNK1A1	ENSG00000113712	GO:0005524	ATP binding	Interacting selectively and non-covalently with ATP, adenosine 5'-triphosphate, a universally important coenzyme and enzyme regulator. [ISBN:0198506732]	IEA	molecular_function
CSNK1A1	ENSG00000113712	GO:0016772	transferase activity, transferring phosphorus-containing groups	Catalysis of the transfer of a phosphorus-containing group from one compound (donor) to another (acceptor). [GOC:jl, ISBN:0198506732]	IEA	molecular_function
CSNK1A1	ENSG00000113712	GO:0006468	protein phosphorylation	The process of introducing a phosphate group on to a protein. [GOC:hb]	IEA	biological_process
CSNK1A1	ENSG00000113712	GO:0004672	protein kinase activity	Catalysis of the phosphorylation of an amino acid residue in a protein, usually according to the reaction: a protein + ATP = a phosphoprotein + ADP. [MetaCyc:PROTEIN-KINASE-RXN]	IEA	molecular_function
CSNK1A1	ENSG00000113712	GO:0005524	ATP binding	Interacting selectively and non-covalently with ATP, adenosine 5'-triphosphate, a universally important coenzyme and enzyme regulator. [ISBN:0198506732]	IEA	molecular_function
CSNK1A1	ENSG00000113712	GO:0005847	mRNA cleavage and polyadenylation specificity factor complex	A multisubunit complex that binds to the canonical AAUAAA hexamer and to U-rich upstream sequence elements on the pre-mRNA, thereby stimulating the otherwise weakly active and nonspecific polymerase to elongate efficiently RNAs containing a poly(A) signal. [PMID:14749727]	IDA	cellular_component
CSNK1A1	ENSG00000113712	GO:0016607	nuclear speck	A discrete extra-nucleolar subnuclear domain, 20-50 in number, in which splicing factors are seen to be localized by immunofluorescence microscopy. [http://www.cellnucleus.com/]	IDA	cellular_component
CSNK1A1	ENSG00000113712	GO:0016772	transferase activity, transferring phosphorus-containing groups	Catalysis of the transfer of a phosphorus-containing group from one compound (donor) to another (acceptor). [GOC:jl, ISBN:0198506732]	IEA	molecular_function
CSNK1A1	ENSG00000113712	GO:0007166	cell surface receptor signaling pathway	A series of molecular signals initiated by activation of a receptor on the surface of a cell. The pathway begins with binding of an extracellular ligand to a cell surface receptor, or for receptors that signal in the absence of a ligand, by ligand-withdrawal or the activity of a constitutively active receptor. The pathway ends with regulation of a downstream cellular process, e.g. transcription. …	TAS	biological_process
CSNK1A1	ENSG00000113712	GO:0000777	condensed chromosome kinetochore	A multisubunit complex that is located at the centromeric region of a condensed chromosome and provides an attachment point for the spindle microtubules. [GOC:elh]	IEA	cellular_component
CSNK1A1	ENSG00000113712	GO:0004713	protein tyrosine kinase activity	Catalysis of the reaction: ATP + a protein tyrosine = ADP + protein tyrosine phosphate. [EC:2.7.10]	IEA	molecular_function
CSNK1A1	ENSG00000113712	GO:0006468	protein phosphorylation	The process of introducing a phosphate group on to a protein. [GOC:hb]	IDA	biological_process
CSNK1A1	ENSG00000113712	GO:0016055	Wnt signaling pathway	The series of molecular signals initiated by binding of a Wnt protein to a frizzled family receptor on the surface of the target cell and ending with a change in cell state. [GOC:dph, GOC:go_curators, PMID:11532397]	IEA	biological_process
CSNK1A1	ENSG00000113712	GO:0005813	centrosome	A structure comprised of a core structure (in most organisms, a pair of centrioles) and peripheral material from which a microtubule-based structure, such as a spindle apparatus, is organized. Centrosomes occur close to the nucleus during interphase in many eukaryotic cells, though in animal cells it changes continually during the cell-division cycle. [GOC:mah, ISBN:0198547684]	IDA	cellular_component
CSNK1A1	ENSG00000113712	GO:0007165	signal transduction	The cellular process in which a signal is conveyed to trigger a change in the activity or state of a cell. Signal transduction begins with reception of a signal (e.g. a ligand binding to a receptor or receptor activation by a stimulus such as light), or for signal transduction in the absence of ligand, signal-withdrawal or the activity of a constitutively active receptor. Signal transduction ends…	NAS	biological_process
CSNK1A1	ENSG00000113712	GO:0004672	protein kinase activity	Catalysis of the phosphorylation of an amino acid residue in a protein, usually according to the reaction: a protein + ATP = a phosphoprotein + ADP. [MetaCyc:PROTEIN-KINASE-RXN]	TAS	molecular_function
CSNK1A1	ENSG00000113712	GO:0004674	protein serine/threonine kinase activity	Catalysis of the reactions: ATP + protein serine = ADP + protein serine phosphate, and ATP + protein threonine = ADP + protein threonine phosphate. [GOC:bf]	IDA	molecular_function
CSNK1A1	ENSG00000113712	GO:0007067	mitosis	A cell cycle process comprising the steps by which the nucleus of a eukaryotic cell divides; the process involves condensation of chromosomal DNA into a highly compacted form. Canonically, mitosis produces two daughter nuclei whose chromosome complement is identical to that of the mother cell. [GOC:dph, GOC:ma, GOC:mah, ISBN:0198547684]	IEA	biological_process
CSNK1A1	ENSG00000113712	GO:0005829	cytosol	The part of the cytoplasm that does not contain organelles but which does contain other particulate matter, such as protein complexes. [GOC:hgd, GOC:jl]	TAS	cellular_component
CSNK1A1	ENSG00000113712	GO:0005524	ATP binding	Interacting selectively and non-covalently with ATP, adenosine 5'-triphosphate, a universally important coenzyme and enzyme regulator. [ISBN:0198506732]	IEA	molecular_function
CSNK1A1	ENSG00000113712	GO:0005515	protein binding	Interacting selectively and non-covalently with any protein or protein complex (a complex of two or more proteins that may include other nonprotein molecules). [GOC:go_curators]	IPI	molecular_function
CTBP2	ENSG00000175029	GO:0019079	viral genome replication	Any process involved directly in viral genome replication, including viral nucleotide metabolism. [ISBN:0781702534]	TAS	biological_process
CTBP2	ENSG00000175029	GO:0050872	white fat cell differentiation	The process in which a relatively unspecialized cell acquires specialized features of a white adipocyte, an animal connective tissue cell involved in energy storage. White adipocytes have cytoplasmic lipids arranged in a unique vacuole. [PMID:12508945]	ISS	biological_process
CTBP2	ENSG00000175029	GO:0016616	oxidoreductase activity, acting on the CH-OH group of donors, NAD or NADP as acceptor	Catalysis of an oxidation-reduction (redox) reaction in which a CH-OH group acts as a hydrogen or electron donor and reduces NAD+ or NADP. [GOC:ai]	IEA	molecular_function
CTBP2	ENSG00000175029	GO:0048037	cofactor binding	Interacting selectively and non-covalently with a cofactor, a substance that is required for the activity of an enzyme or other protein. Cofactors may be inorganic, such as the metal atoms zinc, iron, and copper in certain forms, or organic, in which case they are referred to as coenzymes. Cofactors may either be bound tightly to active sites or bind loosely with the substrate. [ISBN:0198506732]	IEA	molecular_function
CTBP2	ENSG00000175029	GO:0017053	transcriptional repressor complex	A protein complex that possesses activity that prevents or downregulates transcription. [GOC:mah]	ISS	cellular_component
CTBP2	ENSG00000175029	GO:0051287	NAD binding	Interacting selectively and non-covalently with nicotinamide adenine dinucleotide, a coenzyme involved in many redox and biosynthetic reactions; binding may be to either the oxidized form, NAD+, or the reduced form, NADH. [GOC:ai]	IEA	molecular_function
CTBP2	ENSG00000175029	GO:0045202	synapse	The junction between a nerve fiber of one neuron and another neuron or muscle fiber or glial cell; the site of interneuronal communication. As the nerve fiber approaches the synapse it enlarges into a specialized structure, the presynaptic nerve ending, which contains mitochondria and synaptic vesicles. At the tip of the nerve ending is the presynaptic membrane; facing it, and separated from it b…	IEA	cellular_component
CTBP2	ENSG00000175029	GO:0008152	metabolic process	The chemical reactions and pathways, including anabolism and catabolism, by which living organisms transform chemical substances. Metabolic processes typically transform small molecules, but also include macromolecular processes such as DNA repair and replication, and protein synthesis and degradation. [GOC:go_curators, ISBN:0198547684]	IEA	biological_process
CTBP2	ENSG00000175029	GO:0045892	negative regulation of transcription, DNA-dependent	Any process that stops, prevents, or reduces the frequency, rate or extent of cellular DNA-dependent transcription. [GOC:go_curators, GOC:txnOH]	ISS	biological_process
CTBP2	ENSG00000175029	GO:0030054	cell junction	A cellular component that forms a specialized region of connection between two cells or between a cell and the extracellular matrix. At a cell junction, anchoring proteins extend through the plasma membrane to link cytoskeletal proteins in one cell to cytoskeletal proteins in neighboring cells or to proteins in the extracellular matrix. [GOC:mah, http://www.vivo.colostate.edu/hbooks/cmb/cells/pme…	IEA	cellular_component
CTBP2	ENSG00000175029	GO:0055114	oxidation-reduction process	A metabolic process that results in the removal or addition of one or more electrons to or from a substance, with or without the concomitant removal or addition of a proton or protons. [GOC:dhl, GOC:ecd, GOC:jh2, GOC:jid, GOC:mlg, GOC:rph]	IEA	biological_process
CTBP2	ENSG00000175029	GO:0008285	negative regulation of cell proliferation	Any process that stops, prevents or reduces the rate or extent of cell proliferation. [GOC:go_curators]	TAS	biological_process
CTBP2	ENSG00000175029	GO:0006351	transcription, DNA-templated	The cellular synthesis of RNA on a template of DNA. [GOC:jl, GOC:txnOH]	IEA	biological_process
CTBP2	ENSG00000175029	GO:0005515	protein binding	Interacting selectively and non-covalently with any protein or protein complex (a complex of two or more proteins that may include other nonprotein molecules). [GOC:go_curators]	IPI	molecular_function
CTBP2	ENSG00000175029	GO:0003714	transcription corepressor activity	Interacting selectively and non-covalently with a repressing transcription factor and also with the basal transcription machinery in order to stop, prevent, or reduce the frequency, rate or extent of transcription. Cofactors generally do not bind DNA, but rather mediate protein-protein interactions between repressive transcription factors and the basal transcription machinery. [GOC:txnOH, PMID:10…	IEA	molecular_function
CTBP2	ENSG00000175029	GO:0005634	nucleus	A membrane-bounded organelle of eukaryotic cells in which chromosomes are housed and replicated. In most cells, the nucleus contains all of the cell's chromosomes except the organellar chromosomes, and is the site of RNA synthesis and processing. In some species, or in specialized cell types, RNA metabolism or DNA replication may be absent. [GOC:go_curators]	ISS	cellular_component
CTBP2	ENSG00000175029	GO:0019079	viral genome replication	Any process involved directly in viral genome replication, including viral nucleotide metabolism. [ISBN:0781702534]	TAS	biological_process
CTBP2	ENSG00000175029	GO:0050872	white fat cell differentiation	The process in which a relatively unspecialized cell acquires specialized features of a white adipocyte, an animal connective tissue cell involved in energy storage. White adipocytes have cytoplasmic lipids arranged in a unique vacuole. [PMID:12508945]	ISS	biological_process
CTBP2	ENSG00000175029	GO:0016616	oxidoreductase activity, acting on the CH-OH group of donors, NAD or NADP as acceptor	Catalysis of an oxidation-reduction (redox) reaction in which a CH-OH group acts as a hydrogen or electron donor and reduces NAD+ or NADP. [GOC:ai]	IEA	molecular_function
CTBP2	ENSG00000175029	GO:0048037	cofactor binding	Interacting selectively and non-covalently with a cofactor, a substance that is required for the activity of an enzyme or other protein. Cofactors may be inorganic, such as the metal atoms zinc, iron, and copper in certain forms, or organic, in which case they are referred to as coenzymes. Cofactors may either be bound tightly to active sites or bind loosely with the substrate. [ISBN:0198506732]	IEA	molecular_function
CTBP2	ENSG00000175029	GO:0017053	transcriptional repressor complex	A protein complex that possesses activity that prevents or downregulates transcription. [GOC:mah]	ISS	cellular_component
CTBP2	ENSG00000175029	GO:0051287	NAD binding	Interacting selectively and non-covalently with nicotinamide adenine dinucleotide, a coenzyme involved in many redox and biosynthetic reactions; binding may be to either the oxidized form, NAD+, or the reduced form, NADH. [GOC:ai]	IEA	molecular_function
CTBP2	ENSG00000175029	GO:0045202	synapse	The junction between a nerve fiber of one neuron and another neuron or muscle fiber or glial cell; the site of interneuronal communication. As the nerve fiber approaches the synapse it enlarges into a specialized structure, the presynaptic nerve ending, which contains mitochondria and synaptic vesicles. At the tip of the nerve ending is the presynaptic membrane; facing it, and separated from it b…	IEA	cellular_component
CTBP2	ENSG00000175029	GO:0008152	metabolic process	The chemical reactions and pathways, including anabolism and catabolism, by which living organisms transform chemical substances. Metabolic processes typically transform small molecules, but also include macromolecular processes such as DNA repair and replication, and protein synthesis and degradation. [GOC:go_curators, ISBN:0198547684]	IEA	biological_process
CTBP2	ENSG00000175029	GO:0045892	negative regulation of transcription, DNA-dependent	Any process that stops, prevents, or reduces the frequency, rate or extent of cellular DNA-dependent transcription. [GOC:go_curators, GOC:txnOH]	ISS	biological_process
CTBP2	ENSG00000175029	GO:0030054	cell junction	A cellular component that forms a specialized region of connection between two cells or between a cell and the extracellular matrix. At a cell junction, anchoring proteins extend through the plasma membrane to link cytoskeletal proteins in one cell to cytoskeletal proteins in neighboring cells or to proteins in the extracellular matrix. [GOC:mah, http://www.vivo.colostate.edu/hbooks/cmb/cells/pme…	IEA	cellular_component
CTBP2	ENSG00000175029	GO:0055114	oxidation-reduction process	A metabolic process that results in the removal or addition of one or more electrons to or from a substance, with or without the concomitant removal or addition of a proton or protons. [GOC:dhl, GOC:ecd, GOC:jh2, GOC:jid, GOC:mlg, GOC:rph]	IEA	biological_process
CTBP2	ENSG00000175029	GO:0008285	negative regulation of cell proliferation	Any process that stops, prevents or reduces the rate or extent of cell proliferation. [GOC:go_curators]	TAS	biological_process
CTBP2	ENSG00000175029	GO:0006351	transcription, DNA-templated	The cellular synthesis of RNA on a template of DNA. [GOC:jl, GOC:txnOH]	IEA	biological_process
CTBP2	ENSG00000175029	GO:0005515	protein binding	Interacting selectively and non-covalently with any protein or protein complex (a complex of two or more proteins that may include other nonprotein molecules). [GOC:go_curators]	IPI	molecular_function
CTBP2	ENSG00000175029	GO:0003714	transcription corepressor activity	Interacting selectively and non-covalently with a repressing transcription factor and also with the basal transcription machinery in order to stop, prevent, or reduce the frequency, rate or extent of transcription. Cofactors generally do not bind DNA, but rather mediate protein-protein interactions between repressive transcription factors and the basal transcription machinery. [GOC:txnOH, PMID:10…	IEA	molecular_function
CTBP2	ENSG00000175029	GO:0005634	nucleus	A membrane-bounded organelle of eukaryotic cells in which chromosomes are housed and replicated. In most cells, the nucleus contains all of the cell's chromosomes except the organellar chromosomes, and is the site of RNA synthesis and processing. In some species, or in specialized cell types, RNA metabolism or DNA replication may be absent. [GOC:go_curators]	ISS	cellular_component
CTBP2	ENSG00000175029	GO:0005515	protein binding	Interacting selectively and non-covalently with any protein or protein complex (a complex of two or more proteins that may include other nonprotein molecules). [GOC:go_curators]	IEA	molecular_function
CTBP2	ENSG00000175029	GO:0005634	nucleus	A membrane-bounded organelle of eukaryotic cells in which chromosomes are housed and replicated. In most cells, the nucleus contains all of the cell's chromosomes except the organellar chromosomes, and is the site of RNA synthesis and processing. In some species, or in specialized cell types, RNA metabolism or DNA replication may be absent. [GOC:go_curators]	IEA	cellular_component
CTBP2	ENSG00000175029	GO:0045892	negative regulation of transcription, DNA-dependent	Any process that stops, prevents, or reduces the frequency, rate or extent of cellular DNA-dependent transcription. [GOC:go_curators, GOC:txnOH]	IEA	biological_process
CTBP2	ENSG00000175029	GO:0017053	transcriptional repressor complex	A protein complex that possesses activity that prevents or downregulates transcription. [GOC:mah]	IEA	cellular_component
CTBP2	ENSG00000175029	GO:0050872	white fat cell differentiation	The process in which a relatively unspecialized cell acquires specialized features of a white adipocyte, an animal connective tissue cell involved in energy storage. White adipocytes have cytoplasmic lipids arranged in a unique vacuole. [PMID:12508945]	IEA	biological_process
CTBP2	ENSG00000175029	GO:0016616	oxidoreductase activity, acting on the CH-OH group of donors, NAD or NADP as acceptor	Catalysis of an oxidation-reduction (redox) reaction in which a CH-OH group acts as a hydrogen or electron donor and reduces NAD+ or NADP. [GOC:ai]	IEA	molecular_function
CTBP2	ENSG00000175029	GO:0048037	cofactor binding	Interacting selectively and non-covalently with a cofactor, a substance that is required for the activity of an enzyme or other protein. Cofactors may be inorganic, such as the metal atoms zinc, iron, and copper in certain forms, or organic, in which case they are referred to as coenzymes. Cofactors may either be bound tightly to active sites or bind loosely with the substrate. [ISBN:0198506732]	IEA	molecular_function
CTBP2	ENSG00000175029	GO:0051287	NAD binding	Interacting selectively and non-covalently with nicotinamide adenine dinucleotide, a coenzyme involved in many redox and biosynthetic reactions; binding may be to either the oxidized form, NAD+, or the reduced form, NADH. [GOC:ai]	IEA	molecular_function
CTBP2	ENSG00000175029	GO:0008152	metabolic process	The chemical reactions and pathways, including anabolism and catabolism, by which living organisms transform chemical substances. Metabolic processes typically transform small molecules, but also include macromolecular processes such as DNA repair and replication, and protein synthesis and degradation. [GOC:go_curators, ISBN:0198547684]	IEA	biological_process
CTBP2	ENSG00000175029	GO:0055114	oxidation-reduction process	A metabolic process that results in the removal or addition of one or more electrons to or from a substance, with or without the concomitant removal or addition of a proton or protons. [GOC:dhl, GOC:ecd, GOC:jh2, GOC:jid, GOC:mlg, GOC:rph]	IEA	biological_process
CTBP2	ENSG00000175029	GO:0019079	viral genome replication	Any process involved directly in viral genome replication, including viral nucleotide metabolism. [ISBN:0781702534]	TAS	biological_process
CTBP2	ENSG00000175029	GO:0050872	white fat cell differentiation	The process in which a relatively unspecialized cell acquires specialized features of a white adipocyte, an animal connective tissue cell involved in energy storage. White adipocytes have cytoplasmic lipids arranged in a unique vacuole. [PMID:12508945]	ISS	biological_process
CTBP2	ENSG00000175029	GO:0016616	oxidoreductase activity, acting on the CH-OH group of donors, NAD or NADP as acceptor	Catalysis of an oxidation-reduction (redox) reaction in which a CH-OH group acts as a hydrogen or electron donor and reduces NAD+ or NADP. [GOC:ai]	IEA	molecular_function
CTBP2	ENSG00000175029	GO:0048037	cofactor binding	Interacting selectively and non-covalently with a cofactor, a substance that is required for the activity of an enzyme or other protein. Cofactors may be inorganic, such as the metal atoms zinc, iron, and copper in certain forms, or organic, in which case they are referred to as coenzymes. Cofactors may either be bound tightly to active sites or bind loosely with the substrate. [ISBN:0198506732]	IEA	molecular_function
CTBP2	ENSG00000175029	GO:0017053	transcriptional repressor complex	A protein complex that possesses activity that prevents or downregulates transcription. [GOC:mah]	ISS	cellular_component
CTBP2	ENSG00000175029	GO:0051287	NAD binding	Interacting selectively and non-covalently with nicotinamide adenine dinucleotide, a coenzyme involved in many redox and biosynthetic reactions; binding may be to either the oxidized form, NAD+, or the reduced form, NADH. [GOC:ai]	IEA	molecular_function
CTBP2	ENSG00000175029	GO:0045202	synapse	The junction between a nerve fiber of one neuron and another neuron or muscle fiber or glial cell; the site of interneuronal communication. As the nerve fiber approaches the synapse it enlarges into a specialized structure, the presynaptic nerve ending, which contains mitochondria and synaptic vesicles. At the tip of the nerve ending is the presynaptic membrane; facing it, and separated from it b…	IEA	cellular_component
CTBP2	ENSG00000175029	GO:0008152	metabolic process	The chemical reactions and pathways, including anabolism and catabolism, by which living organisms transform chemical substances. Metabolic processes typically transform small molecules, but also include macromolecular processes such as DNA repair and replication, and protein synthesis and degradation. [GOC:go_curators, ISBN:0198547684]	IEA	biological_process
CTBP2	ENSG00000175029	GO:0045892	negative regulation of transcription, DNA-dependent	Any process that stops, prevents, or reduces the frequency, rate or extent of cellular DNA-dependent transcription. [GOC:go_curators, GOC:txnOH]	ISS	biological_process
CTBP2	ENSG00000175029	GO:0030054	cell junction	A cellular component that forms a specialized region of connection between two cells or between a cell and the extracellular matrix. At a cell junction, anchoring proteins extend through the plasma membrane to link cytoskeletal proteins in one cell to cytoskeletal proteins in neighboring cells or to proteins in the extracellular matrix. [GOC:mah, http://www.vivo.colostate.edu/hbooks/cmb/cells/pme…	IEA	cellular_component
CTBP2	ENSG00000175029	GO:0055114	oxidation-reduction process	A metabolic process that results in the removal or addition of one or more electrons to or from a substance, with or without the concomitant removal or addition of a proton or protons. [GOC:dhl, GOC:ecd, GOC:jh2, GOC:jid, GOC:mlg, GOC:rph]	IEA	biological_process
CTBP2	ENSG00000175029	GO:0008285	negative regulation of cell proliferation	Any process that stops, prevents or reduces the rate or extent of cell proliferation. [GOC:go_curators]	TAS	biological_process
CTBP2	ENSG00000175029	GO:0006351	transcription, DNA-templated	The cellular synthesis of RNA on a template of DNA. [GOC:jl, GOC:txnOH]	IEA	biological_process
CTBP2	ENSG00000175029	GO:0005515	protein binding	Interacting selectively and non-covalently with any protein or protein complex (a complex of two or more proteins that may include other nonprotein molecules). [GOC:go_curators]	IPI	molecular_function
CTBP2	ENSG00000175029	GO:0003714	transcription corepressor activity	Interacting selectively and non-covalently with a repressing transcription factor and also with the basal transcription machinery in order to stop, prevent, or reduce the frequency, rate or extent of transcription. Cofactors generally do not bind DNA, but rather mediate protein-protein interactions between repressive transcription factors and the basal transcription machinery. [GOC:txnOH, PMID:10…	IEA	molecular_function
CTBP2	ENSG00000175029	GO:0005634	nucleus	A membrane-bounded organelle of eukaryotic cells in which chromosomes are housed and replicated. In most cells, the nucleus contains all of the cell's chromosomes except the organellar chromosomes, and is the site of RNA synthesis and processing. In some species, or in specialized cell types, RNA metabolism or DNA replication may be absent. [GOC:go_curators]	ISS	cellular_component
CTBP2	ENSG00000175029	GO:0019079	viral genome replication	Any process involved directly in viral genome replication, including viral nucleotide metabolism. [ISBN:0781702534]	TAS	biological_process
CTBP2	ENSG00000175029	GO:0050872	white fat cell differentiation	The process in which a relatively unspecialized cell acquires specialized features of a white adipocyte, an animal connective tissue cell involved in energy storage. White adipocytes have cytoplasmic lipids arranged in a unique vacuole. [PMID:12508945]	ISS	biological_process
CTBP2	ENSG00000175029	GO:0016616	oxidoreductase activity, acting on the CH-OH group of donors, NAD or NADP as acceptor	Catalysis of an oxidation-reduction (redox) reaction in which a CH-OH group acts as a hydrogen or electron donor and reduces NAD+ or NADP. [GOC:ai]	IEA	molecular_function
CTBP2	ENSG00000175029	GO:0048037	cofactor binding	Interacting selectively and non-covalently with a cofactor, a substance that is required for the activity of an enzyme or other protein. Cofactors may be inorganic, such as the metal atoms zinc, iron, and copper in certain forms, or organic, in which case they are referred to as coenzymes. Cofactors may either be bound tightly to active sites or bind loosely with the substrate. [ISBN:0198506732]	IEA	molecular_function
CTBP2	ENSG00000175029	GO:0017053	transcriptional repressor complex	A protein complex that possesses activity that prevents or downregulates transcription. [GOC:mah]	ISS	cellular_component
CTBP2	ENSG00000175029	GO:0051287	NAD binding	Interacting selectively and non-covalently with nicotinamide adenine dinucleotide, a coenzyme involved in many redox and biosynthetic reactions; binding may be to either the oxidized form, NAD+, or the reduced form, NADH. [GOC:ai]	IEA	molecular_function
CTBP2	ENSG00000175029	GO:0045202	synapse	The junction between a nerve fiber of one neuron and another neuron or muscle fiber or glial cell; the site of interneuronal communication. As the nerve fiber approaches the synapse it enlarges into a specialized structure, the presynaptic nerve ending, which contains mitochondria and synaptic vesicles. At the tip of the nerve ending is the presynaptic membrane; facing it, and separated from it b…	IEA	cellular_component
CTBP2	ENSG00000175029	GO:0008152	metabolic process	The chemical reactions and pathways, including anabolism and catabolism, by which living organisms transform chemical substances. Metabolic processes typically transform small molecules, but also include macromolecular processes such as DNA repair and replication, and protein synthesis and degradation. [GOC:go_curators, ISBN:0198547684]	IEA	biological_process
CTBP2	ENSG00000175029	GO:0045892	negative regulation of transcription, DNA-dependent	Any process that stops, prevents, or reduces the frequency, rate or extent of cellular DNA-dependent transcription. [GOC:go_curators, GOC:txnOH]	ISS	biological_process
CTBP2	ENSG00000175029	GO:0030054	cell junction	A cellular component that forms a specialized region of connection between two cells or between a cell and the extracellular matrix. At a cell junction, anchoring proteins extend through the plasma membrane to link cytoskeletal proteins in one cell to cytoskeletal proteins in neighboring cells or to proteins in the extracellular matrix. [GOC:mah, http://www.vivo.colostate.edu/hbooks/cmb/cells/pme…	IEA	cellular_component
CTBP2	ENSG00000175029	GO:0055114	oxidation-reduction process	A metabolic process that results in the removal or addition of one or more electrons to or from a substance, with or without the concomitant removal or addition of a proton or protons. [GOC:dhl, GOC:ecd, GOC:jh2, GOC:jid, GOC:mlg, GOC:rph]	IEA	biological_process
CTBP2	ENSG00000175029	GO:0008285	negative regulation of cell proliferation	Any process that stops, prevents or reduces the rate or extent of cell proliferation. [GOC:go_curators]	TAS	biological_process
CTBP2	ENSG00000175029	GO:0006351	transcription, DNA-templated	The cellular synthesis of RNA on a template of DNA. [GOC:jl, GOC:txnOH]	IEA	biological_process
CTBP2	ENSG00000175029	GO:0005515	protein binding	Interacting selectively and non-covalently with any protein or protein complex (a complex of two or more proteins that may include other nonprotein molecules). [GOC:go_curators]	IPI	molecular_function
CTBP2	ENSG00000175029	GO:0003714	transcription corepressor activity	Interacting selectively and non-covalently with a repressing transcription factor and also with the basal transcription machinery in order to stop, prevent, or reduce the frequency, rate or extent of transcription. Cofactors generally do not bind DNA, but rather mediate protein-protein interactions between repressive transcription factors and the basal transcription machinery. [GOC:txnOH, PMID:10…	IEA	molecular_function
CTBP2	ENSG00000175029	GO:0005634	nucleus	A membrane-bounded organelle of eukaryotic cells in which chromosomes are housed and replicated. In most cells, the nucleus contains all of the cell's chromosomes except the organellar chromosomes, and is the site of RNA synthesis and processing. In some species, or in specialized cell types, RNA metabolism or DNA replication may be absent. [GOC:go_curators]	ISS	cellular_component
CTBP2	ENSG00000175029	GO:0019079	viral genome replication	Any process involved directly in viral genome replication, including viral nucleotide metabolism. [ISBN:0781702534]	TAS	biological_process
CTBP2	ENSG00000175029	GO:0050872	white fat cell differentiation	The process in which a relatively unspecialized cell acquires specialized features of a white adipocyte, an animal connective tissue cell involved in energy storage. White adipocytes have cytoplasmic lipids arranged in a unique vacuole. [PMID:12508945]	ISS	biological_process
CTBP2	ENSG00000175029	GO:0016616	oxidoreductase activity, acting on the CH-OH group of donors, NAD or NADP as acceptor	Catalysis of an oxidation-reduction (redox) reaction in which a CH-OH group acts as a hydrogen or electron donor and reduces NAD+ or NADP. [GOC:ai]	IEA	molecular_function
CTBP2	ENSG00000175029	GO:0048037	cofactor binding	Interacting selectively and non-covalently with a cofactor, a substance that is required for the activity of an enzyme or other protein. Cofactors may be inorganic, such as the metal atoms zinc, iron, and copper in certain forms, or organic, in which case they are referred to as coenzymes. Cofactors may either be bound tightly to active sites or bind loosely with the substrate. [ISBN:0198506732]	IEA	molecular_function
CTBP2	ENSG00000175029	GO:0017053	transcriptional repressor complex	A protein complex that possesses activity that prevents or downregulates transcription. [GOC:mah]	ISS	cellular_component
CTBP2	ENSG00000175029	GO:0051287	NAD binding	Interacting selectively and non-covalently with nicotinamide adenine dinucleotide, a coenzyme involved in many redox and biosynthetic reactions; binding may be to either the oxidized form, NAD+, or the reduced form, NADH. [GOC:ai]	IEA	molecular_function
CTBP2	ENSG00000175029	GO:0045202	synapse	The junction between a nerve fiber of one neuron and another neuron or muscle fiber or glial cell; the site of interneuronal communication. As the nerve fiber approaches the synapse it enlarges into a specialized structure, the presynaptic nerve ending, which contains mitochondria and synaptic vesicles. At the tip of the nerve ending is the presynaptic membrane; facing it, and separated from it b…	IEA	cellular_component
CTBP2	ENSG00000175029	GO:0008152	metabolic process	The chemical reactions and pathways, including anabolism and catabolism, by which living organisms transform chemical substances. Metabolic processes typically transform small molecules, but also include macromolecular processes such as DNA repair and replication, and protein synthesis and degradation. [GOC:go_curators, ISBN:0198547684]	IEA	biological_process
CTBP2	ENSG00000175029	GO:0045892	negative regulation of transcription, DNA-dependent	Any process that stops, prevents, or reduces the frequency, rate or extent of cellular DNA-dependent transcription. [GOC:go_curators, GOC:txnOH]	ISS	biological_process
CTBP2	ENSG00000175029	GO:0030054	cell junction	A cellular component that forms a specialized region of connection between two cells or between a cell and the extracellular matrix. At a cell junction, anchoring proteins extend through the plasma membrane to link cytoskeletal proteins in one cell to cytoskeletal proteins in neighboring cells or to proteins in the extracellular matrix. [GOC:mah, http://www.vivo.colostate.edu/hbooks/cmb/cells/pme…	IEA	cellular_component
CTBP2	ENSG00000175029	GO:0055114	oxidation-reduction process	A metabolic process that results in the removal or addition of one or more electrons to or from a substance, with or without the concomitant removal or addition of a proton or protons. [GOC:dhl, GOC:ecd, GOC:jh2, GOC:jid, GOC:mlg, GOC:rph]	IEA	biological_process
CTBP2	ENSG00000175029	GO:0008285	negative regulation of cell proliferation	Any process that stops, prevents or reduces the rate or extent of cell proliferation. [GOC:go_curators]	TAS	biological_process
CTBP2	ENSG00000175029	GO:0006351	transcription, DNA-templated	The cellular synthesis of RNA on a template of DNA. [GOC:jl, GOC:txnOH]	IEA	biological_process
CTBP2	ENSG00000175029	GO:0005515	protein binding	Interacting selectively and non-covalently with any protein or protein complex (a complex of two or more proteins that may include other nonprotein molecules). [GOC:go_curators]	IPI	molecular_function
CTBP2	ENSG00000175029	GO:0003714	transcription corepressor activity	Interacting selectively and non-covalently with a repressing transcription factor and also with the basal transcription machinery in order to stop, prevent, or reduce the frequency, rate or extent of transcription. Cofactors generally do not bind DNA, but rather mediate protein-protein interactions between repressive transcription factors and the basal transcription machinery. [GOC:txnOH, PMID:10…	IEA	molecular_function
CTBP2	ENSG00000175029	GO:0005634	nucleus	A membrane-bounded organelle of eukaryotic cells in which chromosomes are housed and replicated. In most cells, the nucleus contains all of the cell's chromosomes except the organellar chromosomes, and is the site of RNA synthesis and processing. In some species, or in specialized cell types, RNA metabolism or DNA replication may be absent. [GOC:go_curators]	ISS	cellular_component
CTBP2	ENSG00000175029	-	-	-	-	-
CTNNA2	ENSG00000066032	GO:0051149	positive regulation of muscle cell differentiation	Any process that activates or increases the frequency, rate or extent of muscle cell differentiation. [CL:0000187, GOC:ai]	TAS	biological_process
CTNNA2	ENSG00000066032	GO:0042692	muscle cell differentiation	The process in which a relatively unspecialized cell acquires specialized features of a muscle cell. [CL:0000187, GOC:go_curators]	TAS	biological_process
CTNNA2	ENSG00000066032	GO:0060134	prepulse inhibition	The process in which a startle magnitude is reduced when the startling stimulus is preceded by a low-intensity prepulse. [GOC:dph, PMID:10341260]	IEA	biological_process
CTNNA2	ENSG00000066032	GO:0051823	regulation of synapse structural plasticity	Any process that modulates the frequency, rate or extent of synapse structural plasticity. Synapse structural plasticity is a type of cytoskeletal remodeling; this remodeling is induced by stimuli that can lead to long term potentiation and it can be activity-dependent or -independent. Examples of cytoskeletal changes include the formation of new spines and increase in spine size; this can be acc…	IEA	biological_process
CTNNA2	ENSG00000066032	GO:0048854	brain morphogenesis	The process in which the anatomical structures of the brain are generated and organized. The brain is one of the two components of the central nervous system and is the center of thought and emotion. It is responsible for the coordination and control of bodily activities and the interpretation of information from the senses (sight, hearing, smell, etc.). [GOC:dgh, GOC:jid]	IEA	biological_process
CTNNA2	ENSG00000066032	GO:0021942	radial glia guided migration of Purkinje cell	The migration of postmitotic a Purkinje cell along radial glial cells from the ventricular zone to the Purkinje cell layer. [GO_REF:0000021, GOC:cls, GOC:dgh, GOC:dph, GOC:jid, GOC:mtg_15jun06, PMID:15157725]	IEA	biological_process
CTNNA2	ENSG00000066032	GO:0005913	cell-cell adherens junction	An adherens junction which connects a cell to another cell. [GOC:hb]	IEA	cellular_component
CTNNA2	ENSG00000066032	GO:0048813	dendrite morphogenesis	The process in which the anatomical structures of a dendrite are generated and organized. A dendrite is a freely branching protoplasmic process of a nerve cell. [GOC:jl, ISBN:0198506732]	IEA	biological_process
CTNNA2	ENSG00000066032	GO:0045296	cadherin binding	Interacting selectively and non-covalently with cadherin, a type I membrane protein involved in cell adhesion. [GOC:bf]	IEA	molecular_function
CTNNA2	ENSG00000066032	GO:0030027	lamellipodium	A thin sheetlike process extended by the leading edge of a crawling fibroblast; contains a dense meshwork of actin filaments. [ISBN:0815316194]	IEA	cellular_component
CTNNA2	ENSG00000066032	GO:0015629	actin cytoskeleton	The part of the cytoskeleton (the internal framework of a cell) composed of actin and associated proteins. Includes actin cytoskeleton-associated complexes. [GOC:jl, ISBN:0395825172, ISBN:0815316194]	IEA	cellular_component
CTNNA2	ENSG00000066032	GO:0016337	cell-cell adhesion	The attachment of one cell to another cell via adhesion molecules. [GOC:hb]	ISS	biological_process
CTNNA2	ENSG00000066032	GO:0005912	adherens junction	A cell junction at which anchoring proteins (cadherins or integrins) extend through the plasma membrane and are attached to actin filaments. [GOC:mah, http://www.vivo.colostate.edu/hbooks/cmb/cells/pmemb/junctions_a.html, ISBN:0198506732]	ISS	cellular_component
CTNNA2	ENSG00000066032	GO:0005200	structural constituent of cytoskeleton	The action of a molecule that contributes to the structural integrity of a cytoskeletal structure. [GOC:mah]	NAS	molecular_function
CTNNA2	ENSG00000066032	GO:0016323	basolateral plasma membrane	The region of the plasma membrane that includes the basal end and sides of the cell. Often used in reference to animal polarized epithelial membranes, where the basal membrane is the part attached to the extracellular matrix, or in plant cells, where the basal membrane is defined with respect to the zygotic axis. [GOC:go_curators]	IEA	cellular_component
CTNNA2	ENSG00000066032	GO:0007155	cell adhesion	The attachment of a cell, either to another cell or to an underlying substrate such as the extracellular matrix, via cell adhesion molecules. [GOC:hb, GOC:pf]	IEA	biological_process
CTNNA2	ENSG00000066032	GO:0007409	axonogenesis	Generation of a long process of a neuron, that carries efferent (outgoing) action potentials from the cell body towards target cells. [GOC:jid, ISBN:0198506732]	IEA	biological_process
CTNNA2	ENSG00000066032	GO:0005829	cytosol	The part of the cytoplasm that does not contain organelles but which does contain other particulate matter, such as protein complexes. [GOC:hgd, GOC:jl]	TAS	cellular_component
CTNNA2	ENSG00000066032	GO:0005198	structural molecule activity	The action of a molecule that contributes to the structural integrity of a complex or assembly within or outside a cell. [GOC:mah]	IEA	molecular_function
CTNNA2	ENSG00000066032	GO:0030424	axon	The long process of a neuron that conducts nerve impulses, usually away from the cell body to the terminals and varicosities, which are sites of storage and release of neurotransmitter. [GOC:nln, ISBN:0198506732]	IEA	cellular_component
CTNNA2	ENSG00000066032	GO:0005737	cytoplasm	All of the contents of a cell excluding the plasma membrane and nucleus, but including other subcellular structures. [ISBN:0198547684]	IDA	cellular_component
CTNNA2	ENSG00000066032	GO:0005515	protein binding	Interacting selectively and non-covalently with any protein or protein complex (a complex of two or more proteins that may include other nonprotein molecules). [GOC:go_curators]	IPI	molecular_function
CTNNA2	ENSG00000066032	GO:0005912	adherens junction	A cell junction at which anchoring proteins (cadherins or integrins) extend through the plasma membrane and are attached to actin filaments. [GOC:mah, http://www.vivo.colostate.edu/hbooks/cmb/cells/pmemb/junctions_a.html, ISBN:0198506732]	IEA	cellular_component
CTNNA2	ENSG00000066032	GO:0051149	positive regulation of muscle cell differentiation	Any process that activates or increases the frequency, rate or extent of muscle cell differentiation. [CL:0000187, GOC:ai]	TAS	biological_process
CTNNA2	ENSG00000066032	GO:0042692	muscle cell differentiation	The process in which a relatively unspecialized cell acquires specialized features of a muscle cell. [CL:0000187, GOC:go_curators]	TAS	biological_process
CTNNA2	ENSG00000066032	GO:0060134	prepulse inhibition	The process in which a startle magnitude is reduced when the startling stimulus is preceded by a low-intensity prepulse. [GOC:dph, PMID:10341260]	IEA	biological_process
CTNNA2	ENSG00000066032	GO:0051823	regulation of synapse structural plasticity	Any process that modulates the frequency, rate or extent of synapse structural plasticity. Synapse structural plasticity is a type of cytoskeletal remodeling; this remodeling is induced by stimuli that can lead to long term potentiation and it can be activity-dependent or -independent. Examples of cytoskeletal changes include the formation of new spines and increase in spine size; this can be acc…	IEA	biological_process
CTNNA2	ENSG00000066032	GO:0048854	brain morphogenesis	The process in which the anatomical structures of the brain are generated and organized. The brain is one of the two components of the central nervous system and is the center of thought and emotion. It is responsible for the coordination and control of bodily activities and the interpretation of information from the senses (sight, hearing, smell, etc.). [GOC:dgh, GOC:jid]	IEA	biological_process
CTNNA2	ENSG00000066032	GO:0021942	radial glia guided migration of Purkinje cell	The migration of postmitotic a Purkinje cell along radial glial cells from the ventricular zone to the Purkinje cell layer. [GO_REF:0000021, GOC:cls, GOC:dgh, GOC:dph, GOC:jid, GOC:mtg_15jun06, PMID:15157725]	IEA	biological_process
CTNNA2	ENSG00000066032	GO:0005913	cell-cell adherens junction	An adherens junction which connects a cell to another cell. [GOC:hb]	IEA	cellular_component
CTNNA2	ENSG00000066032	GO:0048813	dendrite morphogenesis	The process in which the anatomical structures of a dendrite are generated and organized. A dendrite is a freely branching protoplasmic process of a nerve cell. [GOC:jl, ISBN:0198506732]	IEA	biological_process
CTNNA2	ENSG00000066032	GO:0045296	cadherin binding	Interacting selectively and non-covalently with cadherin, a type I membrane protein involved in cell adhesion. [GOC:bf]	IEA	molecular_function
CTNNA2	ENSG00000066032	GO:0030027	lamellipodium	A thin sheetlike process extended by the leading edge of a crawling fibroblast; contains a dense meshwork of actin filaments. [ISBN:0815316194]	IEA	cellular_component
CTNNA2	ENSG00000066032	GO:0015629	actin cytoskeleton	The part of the cytoskeleton (the internal framework of a cell) composed of actin and associated proteins. Includes actin cytoskeleton-associated complexes. [GOC:jl, ISBN:0395825172, ISBN:0815316194]	IEA	cellular_component
CTNNA2	ENSG00000066032	GO:0016337	cell-cell adhesion	The attachment of one cell to another cell via adhesion molecules. [GOC:hb]	ISS	biological_process
CTNNA2	ENSG00000066032	GO:0005912	adherens junction	A cell junction at which anchoring proteins (cadherins or integrins) extend through the plasma membrane and are attached to actin filaments. [GOC:mah, http://www.vivo.colostate.edu/hbooks/cmb/cells/pmemb/junctions_a.html, ISBN:0198506732]	ISS	cellular_component
CTNNA2	ENSG00000066032	GO:0005200	structural constituent of cytoskeleton	The action of a molecule that contributes to the structural integrity of a cytoskeletal structure. [GOC:mah]	NAS	molecular_function
CTNNA2	ENSG00000066032	GO:0016323	basolateral plasma membrane	The region of the plasma membrane that includes the basal end and sides of the cell. Often used in reference to animal polarized epithelial membranes, where the basal membrane is the part attached to the extracellular matrix, or in plant cells, where the basal membrane is defined with respect to the zygotic axis. [GOC:go_curators]	IEA	cellular_component
CTNNA2	ENSG00000066032	GO:0007155	cell adhesion	The attachment of a cell, either to another cell or to an underlying substrate such as the extracellular matrix, via cell adhesion molecules. [GOC:hb, GOC:pf]	IEA	biological_process
CTNNA2	ENSG00000066032	GO:0007409	axonogenesis	Generation of a long process of a neuron, that carries efferent (outgoing) action potentials from the cell body towards target cells. [GOC:jid, ISBN:0198506732]	IEA	biological_process
CTNNA2	ENSG00000066032	GO:0005829	cytosol	The part of the cytoplasm that does not contain organelles but which does contain other particulate matter, such as protein complexes. [GOC:hgd, GOC:jl]	TAS	cellular_component
CTNNA2	ENSG00000066032	GO:0005198	structural molecule activity	The action of a molecule that contributes to the structural integrity of a complex or assembly within or outside a cell. [GOC:mah]	IEA	molecular_function
CTNNA2	ENSG00000066032	GO:0030424	axon	The long process of a neuron that conducts nerve impulses, usually away from the cell body to the terminals and varicosities, which are sites of storage and release of neurotransmitter. [GOC:nln, ISBN:0198506732]	IEA	cellular_component
CTNNA2	ENSG00000066032	GO:0005737	cytoplasm	All of the contents of a cell excluding the plasma membrane and nucleus, but including other subcellular structures. [ISBN:0198547684]	IDA	cellular_component
CTNNA2	ENSG00000066032	GO:0005515	protein binding	Interacting selectively and non-covalently with any protein or protein complex (a complex of two or more proteins that may include other nonprotein molecules). [GOC:go_curators]	IPI	molecular_function
CTNNA2	ENSG00000066032	GO:0060134	prepulse inhibition	The process in which a startle magnitude is reduced when the startling stimulus is preceded by a low-intensity prepulse. [GOC:dph, PMID:10341260]	IEA	biological_process
CTNNA2	ENSG00000066032	GO:0051823	regulation of synapse structural plasticity	Any process that modulates the frequency, rate or extent of synapse structural plasticity. Synapse structural plasticity is a type of cytoskeletal remodeling; this remodeling is induced by stimuli that can lead to long term potentiation and it can be activity-dependent or -independent. Examples of cytoskeletal changes include the formation of new spines and increase in spine size; this can be acc…	IEA	biological_process
CTNNA2	ENSG00000066032	GO:0048854	brain morphogenesis	The process in which the anatomical structures of the brain are generated and organized. The brain is one of the two components of the central nervous system and is the center of thought and emotion. It is responsible for the coordination and control of bodily activities and the interpretation of information from the senses (sight, hearing, smell, etc.). [GOC:dgh, GOC:jid]	IEA	biological_process
CTNNA2	ENSG00000066032	GO:0021942	radial glia guided migration of Purkinje cell	The migration of postmitotic a Purkinje cell along radial glial cells from the ventricular zone to the Purkinje cell layer. [GO_REF:0000021, GOC:cls, GOC:dgh, GOC:dph, GOC:jid, GOC:mtg_15jun06, PMID:15157725]	IEA	biological_process
CTNNA2	ENSG00000066032	GO:0005913	cell-cell adherens junction	An adherens junction which connects a cell to another cell. [GOC:hb]	IEA	cellular_component
CTNNA2	ENSG00000066032	GO:0048813	dendrite morphogenesis	The process in which the anatomical structures of a dendrite are generated and organized. A dendrite is a freely branching protoplasmic process of a nerve cell. [GOC:jl, ISBN:0198506732]	IEA	biological_process
CTNNA2	ENSG00000066032	GO:0030027	lamellipodium	A thin sheetlike process extended by the leading edge of a crawling fibroblast; contains a dense meshwork of actin filaments. [ISBN:0815316194]	IEA	cellular_component
CTNNA2	ENSG00000066032	GO:0015629	actin cytoskeleton	The part of the cytoskeleton (the internal framework of a cell) composed of actin and associated proteins. Includes actin cytoskeleton-associated complexes. [GOC:jl, ISBN:0395825172, ISBN:0815316194]	IEA	cellular_component
CTNNA2	ENSG00000066032	GO:0016323	basolateral plasma membrane	The region of the plasma membrane that includes the basal end and sides of the cell. Often used in reference to animal polarized epithelial membranes, where the basal membrane is the part attached to the extracellular matrix, or in plant cells, where the basal membrane is defined with respect to the zygotic axis. [GOC:go_curators]	IEA	cellular_component
CTNNA2	ENSG00000066032	GO:0007155	cell adhesion	The attachment of a cell, either to another cell or to an underlying substrate such as the extracellular matrix, via cell adhesion molecules. [GOC:hb, GOC:pf]	IEA	biological_process
CTNNA2	ENSG00000066032	GO:0007409	axonogenesis	Generation of a long process of a neuron, that carries efferent (outgoing) action potentials from the cell body towards target cells. [GOC:jid, ISBN:0198506732]	IEA	biological_process
CTNNA2	ENSG00000066032	GO:0005198	structural molecule activity	The action of a molecule that contributes to the structural integrity of a complex or assembly within or outside a cell. [GOC:mah]	IEA	molecular_function
CTNNA2	ENSG00000066032	GO:0030424	axon	The long process of a neuron that conducts nerve impulses, usually away from the cell body to the terminals and varicosities, which are sites of storage and release of neurotransmitter. [GOC:nln, ISBN:0198506732]	IEA	cellular_component
CTNNA2	ENSG00000066032	GO:0060134	prepulse inhibition	The process in which a startle magnitude is reduced when the startling stimulus is preceded by a low-intensity prepulse. [GOC:dph, PMID:10341260]	IEA	biological_process
CTNNA2	ENSG00000066032	GO:0051823	regulation of synapse structural plasticity	Any process that modulates the frequency, rate or extent of synapse structural plasticity. Synapse structural plasticity is a type of cytoskeletal remodeling; this remodeling is induced by stimuli that can lead to long term potentiation and it can be activity-dependent or -independent. Examples of cytoskeletal changes include the formation of new spines and increase in spine size; this can be acc…	IEA	biological_process
CTNNA2	ENSG00000066032	GO:0048854	brain morphogenesis	The process in which the anatomical structures of the brain are generated and organized. The brain is one of the two components of the central nervous system and is the center of thought and emotion. It is responsible for the coordination and control of bodily activities and the interpretation of information from the senses (sight, hearing, smell, etc.). [GOC:dgh, GOC:jid]	IEA	biological_process
CTNNA2	ENSG00000066032	GO:0021942	radial glia guided migration of Purkinje cell	The migration of postmitotic a Purkinje cell along radial glial cells from the ventricular zone to the Purkinje cell layer. [GO_REF:0000021, GOC:cls, GOC:dgh, GOC:dph, GOC:jid, GOC:mtg_15jun06, PMID:15157725]	IEA	biological_process
CTNNA2	ENSG00000066032	GO:0005913	cell-cell adherens junction	An adherens junction which connects a cell to another cell. [GOC:hb]	IEA	cellular_component
CTNNA2	ENSG00000066032	GO:0048813	dendrite morphogenesis	The process in which the anatomical structures of a dendrite are generated and organized. A dendrite is a freely branching protoplasmic process of a nerve cell. [GOC:jl, ISBN:0198506732]	IEA	biological_process
CTNNA2	ENSG00000066032	GO:0045296	cadherin binding	Interacting selectively and non-covalently with cadherin, a type I membrane protein involved in cell adhesion. [GOC:bf]	IEA	molecular_function
CTNNA2	ENSG00000066032	GO:0030027	lamellipodium	A thin sheetlike process extended by the leading edge of a crawling fibroblast; contains a dense meshwork of actin filaments. [ISBN:0815316194]	IEA	cellular_component
CTNNA2	ENSG00000066032	GO:0015629	actin cytoskeleton	The part of the cytoskeleton (the internal framework of a cell) composed of actin and associated proteins. Includes actin cytoskeleton-associated complexes. [GOC:jl, ISBN:0395825172, ISBN:0815316194]	IEA	cellular_component
CTNNA2	ENSG00000066032	GO:0016323	basolateral plasma membrane	The region of the plasma membrane that includes the basal end and sides of the cell. Often used in reference to animal polarized epithelial membranes, where the basal membrane is the part attached to the extracellular matrix, or in plant cells, where the basal membrane is defined with respect to the zygotic axis. [GOC:go_curators]	IEA	cellular_component
CTNNA2	ENSG00000066032	GO:0007155	cell adhesion	The attachment of a cell, either to another cell or to an underlying substrate such as the extracellular matrix, via cell adhesion molecules. [GOC:hb, GOC:pf]	IEA	biological_process
CTNNA2	ENSG00000066032	GO:0007409	axonogenesis	Generation of a long process of a neuron, that carries efferent (outgoing) action potentials from the cell body towards target cells. [GOC:jid, ISBN:0198506732]	IEA	biological_process
CTNNA2	ENSG00000066032	GO:0005198	structural molecule activity	The action of a molecule that contributes to the structural integrity of a complex or assembly within or outside a cell. [GOC:mah]	IEA	molecular_function
CTNNA2	ENSG00000066032	GO:0030424	axon	The long process of a neuron that conducts nerve impulses, usually away from the cell body to the terminals and varicosities, which are sites of storage and release of neurotransmitter. [GOC:nln, ISBN:0198506732]	IEA	cellular_component
CTNNA2	ENSG00000066032	GO:0015629	actin cytoskeleton	The part of the cytoskeleton (the internal framework of a cell) composed of actin and associated proteins. Includes actin cytoskeleton-associated complexes. [GOC:jl, ISBN:0395825172, ISBN:0815316194]	IEA	cellular_component
CTNNA2	ENSG00000066032	GO:0007155	cell adhesion	The attachment of a cell, either to another cell or to an underlying substrate such as the extracellular matrix, via cell adhesion molecules. [GOC:hb, GOC:pf]	IEA	biological_process
CTNNA2	ENSG00000066032	GO:0005198	structural molecule activity	The action of a molecule that contributes to the structural integrity of a complex or assembly within or outside a cell. [GOC:mah]	IEA	molecular_function
CTNNA2	ENSG00000066032	GO:0051149	positive regulation of muscle cell differentiation	Any process that activates or increases the frequency, rate or extent of muscle cell differentiation. [CL:0000187, GOC:ai]	TAS	biological_process
CTNNA2	ENSG00000066032	GO:0042692	muscle cell differentiation	The process in which a relatively unspecialized cell acquires specialized features of a muscle cell. [CL:0000187, GOC:go_curators]	TAS	biological_process
CTNNA2	ENSG00000066032	GO:0060134	prepulse inhibition	The process in which a startle magnitude is reduced when the startling stimulus is preceded by a low-intensity prepulse. [GOC:dph, PMID:10341260]	IEA	biological_process
CTNNA2	ENSG00000066032	GO:0051823	regulation of synapse structural plasticity	Any process that modulates the frequency, rate or extent of synapse structural plasticity. Synapse structural plasticity is a type of cytoskeletal remodeling; this remodeling is induced by stimuli that can lead to long term potentiation and it can be activity-dependent or -independent. Examples of cytoskeletal changes include the formation of new spines and increase in spine size; this can be acc…	IEA	biological_process
CTNNA2	ENSG00000066032	GO:0048854	brain morphogenesis	The process in which the anatomical structures of the brain are generated and organized. The brain is one of the two components of the central nervous system and is the center of thought and emotion. It is responsible for the coordination and control of bodily activities and the interpretation of information from the senses (sight, hearing, smell, etc.). [GOC:dgh, GOC:jid]	IEA	biological_process
CTNNA2	ENSG00000066032	GO:0021942	radial glia guided migration of Purkinje cell	The migration of postmitotic a Purkinje cell along radial glial cells from the ventricular zone to the Purkinje cell layer. [GO_REF:0000021, GOC:cls, GOC:dgh, GOC:dph, GOC:jid, GOC:mtg_15jun06, PMID:15157725]	IEA	biological_process
CTNNA2	ENSG00000066032	GO:0005913	cell-cell adherens junction	An adherens junction which connects a cell to another cell. [GOC:hb]	IEA	cellular_component
CTNNA2	ENSG00000066032	GO:0048813	dendrite morphogenesis	The process in which the anatomical structures of a dendrite are generated and organized. A dendrite is a freely branching protoplasmic process of a nerve cell. [GOC:jl, ISBN:0198506732]	IEA	biological_process
CTNNA2	ENSG00000066032	GO:0045296	cadherin binding	Interacting selectively and non-covalently with cadherin, a type I membrane protein involved in cell adhesion. [GOC:bf]	IEA	molecular_function
CTNNA2	ENSG00000066032	GO:0030027	lamellipodium	A thin sheetlike process extended by the leading edge of a crawling fibroblast; contains a dense meshwork of actin filaments. [ISBN:0815316194]	IEA	cellular_component
CTNNA2	ENSG00000066032	GO:0015629	actin cytoskeleton	The part of the cytoskeleton (the internal framework of a cell) composed of actin and associated proteins. Includes actin cytoskeleton-associated complexes. [GOC:jl, ISBN:0395825172, ISBN:0815316194]	IEA	cellular_component
CTNNA2	ENSG00000066032	GO:0016337	cell-cell adhesion	The attachment of one cell to another cell via adhesion molecules. [GOC:hb]	ISS	biological_process
CTNNA2	ENSG00000066032	GO:0005912	adherens junction	A cell junction at which anchoring proteins (cadherins or integrins) extend through the plasma membrane and are attached to actin filaments. [GOC:mah, http://www.vivo.colostate.edu/hbooks/cmb/cells/pmemb/junctions_a.html, ISBN:0198506732]	ISS	cellular_component
CTNNA2	ENSG00000066032	GO:0005200	structural constituent of cytoskeleton	The action of a molecule that contributes to the structural integrity of a cytoskeletal structure. [GOC:mah]	NAS	molecular_function
CTNNA2	ENSG00000066032	GO:0016323	basolateral plasma membrane	The region of the plasma membrane that includes the basal end and sides of the cell. Often used in reference to animal polarized epithelial membranes, where the basal membrane is the part attached to the extracellular matrix, or in plant cells, where the basal membrane is defined with respect to the zygotic axis. [GOC:go_curators]	IEA	cellular_component
CTNNA2	ENSG00000066032	GO:0007155	cell adhesion	The attachment of a cell, either to another cell or to an underlying substrate such as the extracellular matrix, via cell adhesion molecules. [GOC:hb, GOC:pf]	IEA	biological_process
CTNNA2	ENSG00000066032	GO:0007409	axonogenesis	Generation of a long process of a neuron, that carries efferent (outgoing) action potentials from the cell body towards target cells. [GOC:jid, ISBN:0198506732]	IEA	biological_process
CTNNA2	ENSG00000066032	GO:0005829	cytosol	The part of the cytoplasm that does not contain organelles but which does contain other particulate matter, such as protein complexes. [GOC:hgd, GOC:jl]	TAS	cellular_component
CTNNA2	ENSG00000066032	GO:0005198	structural molecule activity	The action of a molecule that contributes to the structural integrity of a complex or assembly within or outside a cell. [GOC:mah]	IEA	molecular_function
CTNNA2	ENSG00000066032	GO:0030424	axon	The long process of a neuron that conducts nerve impulses, usually away from the cell body to the terminals and varicosities, which are sites of storage and release of neurotransmitter. [GOC:nln, ISBN:0198506732]	IEA	cellular_component
CTNNA2	ENSG00000066032	GO:0005737	cytoplasm	All of the contents of a cell excluding the plasma membrane and nucleus, but including other subcellular structures. [ISBN:0198547684]	IDA	cellular_component
CTNNA2	ENSG00000066032	GO:0005515	protein binding	Interacting selectively and non-covalently with any protein or protein complex (a complex of two or more proteins that may include other nonprotein molecules). [GOC:go_curators]	IPI	molecular_function
CTNNA2	ENSG00000066032	GO:0051149	positive regulation of muscle cell differentiation	Any process that activates or increases the frequency, rate or extent of muscle cell differentiation. [CL:0000187, GOC:ai]	TAS	biological_process
CTNNA2	ENSG00000066032	GO:0042692	muscle cell differentiation	The process in which a relatively unspecialized cell acquires specialized features of a muscle cell. [CL:0000187, GOC:go_curators]	TAS	biological_process
CTNNA2	ENSG00000066032	GO:0060134	prepulse inhibition	The process in which a startle magnitude is reduced when the startling stimulus is preceded by a low-intensity prepulse. [GOC:dph, PMID:10341260]	ISS	biological_process
CTNNA2	ENSG00000066032	GO:0051823	regulation of synapse structural plasticity	Any process that modulates the frequency, rate or extent of synapse structural plasticity. Synapse structural plasticity is a type of cytoskeletal remodeling; this remodeling is induced by stimuli that can lead to long term potentiation and it can be activity-dependent or -independent. Examples of cytoskeletal changes include the formation of new spines and increase in spine size; this can be acc…	ISS	biological_process
CTNNA2	ENSG00000066032	GO:0048854	brain morphogenesis	The process in which the anatomical structures of the brain are generated and organized. The brain is one of the two components of the central nervous system and is the center of thought and emotion. It is responsible for the coordination and control of bodily activities and the interpretation of information from the senses (sight, hearing, smell, etc.). [GOC:dgh, GOC:jid]	ISS	biological_process
CTNNA2	ENSG00000066032	GO:0021942	radial glia guided migration of Purkinje cell	The migration of postmitotic a Purkinje cell along radial glial cells from the ventricular zone to the Purkinje cell layer. [GO_REF:0000021, GOC:cls, GOC:dgh, GOC:dph, GOC:jid, GOC:mtg_15jun06, PMID:15157725]	ISS	biological_process
CTNNA2	ENSG00000066032	GO:0005913	cell-cell adherens junction	An adherens junction which connects a cell to another cell. [GOC:hb]	IEA	cellular_component
CTNNA2	ENSG00000066032	GO:0048813	dendrite morphogenesis	The process in which the anatomical structures of a dendrite are generated and organized. A dendrite is a freely branching protoplasmic process of a nerve cell. [GOC:jl, ISBN:0198506732]	ISS	biological_process
CTNNA2	ENSG00000066032	GO:0045296	cadherin binding	Interacting selectively and non-covalently with cadherin, a type I membrane protein involved in cell adhesion. [GOC:bf]	IEA	molecular_function
CTNNA2	ENSG00000066032	GO:0030027	lamellipodium	A thin sheetlike process extended by the leading edge of a crawling fibroblast; contains a dense meshwork of actin filaments. [ISBN:0815316194]	IEA	cellular_component
CTNNA2	ENSG00000066032	GO:0015629	actin cytoskeleton	The part of the cytoskeleton (the internal framework of a cell) composed of actin and associated proteins. Includes actin cytoskeleton-associated complexes. [GOC:jl, ISBN:0395825172, ISBN:0815316194]	IEA	cellular_component
CTNNA2	ENSG00000066032	GO:0016337	cell-cell adhesion	The attachment of one cell to another cell via adhesion molecules. [GOC:hb]	ISS	biological_process
CTNNA2	ENSG00000066032	GO:0005912	adherens junction	A cell junction at which anchoring proteins (cadherins or integrins) extend through the plasma membrane and are attached to actin filaments. [GOC:mah, http://www.vivo.colostate.edu/hbooks/cmb/cells/pmemb/junctions_a.html, ISBN:0198506732]	ISS	cellular_component
CTNNA2	ENSG00000066032	GO:0005200	structural constituent of cytoskeleton	The action of a molecule that contributes to the structural integrity of a cytoskeletal structure. [GOC:mah]	NAS	molecular_function
CTNNA2	ENSG00000066032	GO:0016323	basolateral plasma membrane	The region of the plasma membrane that includes the basal end and sides of the cell. Often used in reference to animal polarized epithelial membranes, where the basal membrane is the part attached to the extracellular matrix, or in plant cells, where the basal membrane is defined with respect to the zygotic axis. [GOC:go_curators]	IEA	cellular_component
CTNNA2	ENSG00000066032	GO:0007155	cell adhesion	The attachment of a cell, either to another cell or to an underlying substrate such as the extracellular matrix, via cell adhesion molecules. [GOC:hb, GOC:pf]	IEA	biological_process
CTNNA2	ENSG00000066032	GO:0007409	axonogenesis	Generation of a long process of a neuron, that carries efferent (outgoing) action potentials from the cell body towards target cells. [GOC:jid, ISBN:0198506732]	ISS	biological_process
CTNNA2	ENSG00000066032	GO:0005829	cytosol	The part of the cytoplasm that does not contain organelles but which does contain other particulate matter, such as protein complexes. [GOC:hgd, GOC:jl]	TAS	cellular_component
CTNNA2	ENSG00000066032	GO:0005198	structural molecule activity	The action of a molecule that contributes to the structural integrity of a complex or assembly within or outside a cell. [GOC:mah]	IEA	molecular_function
CTNNA2	ENSG00000066032	GO:0030424	axon	The long process of a neuron that conducts nerve impulses, usually away from the cell body to the terminals and varicosities, which are sites of storage and release of neurotransmitter. [GOC:nln, ISBN:0198506732]	ISS	cellular_component
CTNNA2	ENSG00000066032	GO:0005737	cytoplasm	All of the contents of a cell excluding the plasma membrane and nucleus, but including other subcellular structures. [ISBN:0198547684]	IDA	cellular_component
CTNNA2	ENSG00000066032	GO:0005515	protein binding	Interacting selectively and non-covalently with any protein or protein complex (a complex of two or more proteins that may include other nonprotein molecules). [GOC:go_curators]	IPI	molecular_function
CTNNA2	ENSG00000066032	GO:0045296	cadherin binding	Interacting selectively and non-covalently with cadherin, a type I membrane protein involved in cell adhesion. [GOC:bf]	IEA	molecular_function
CTNNA2	ENSG00000066032	GO:0015629	actin cytoskeleton	The part of the cytoskeleton (the internal framework of a cell) composed of actin and associated proteins. Includes actin cytoskeleton-associated complexes. [GOC:jl, ISBN:0395825172, ISBN:0815316194]	IEA	cellular_component
CTNNA2	ENSG00000066032	GO:0007155	cell adhesion	The attachment of a cell, either to another cell or to an underlying substrate such as the extracellular matrix, via cell adhesion molecules. [GOC:hb, GOC:pf]	IEA	biological_process
CTNNA2	ENSG00000066032	GO:0005198	structural molecule activity	The action of a molecule that contributes to the structural integrity of a complex or assembly within or outside a cell. [GOC:mah]	IEA	molecular_function
CTNNA2	ENSG00000066032	GO:0051149	positive regulation of muscle cell differentiation	Any process that activates or increases the frequency, rate or extent of muscle cell differentiation. [CL:0000187, GOC:ai]	TAS	biological_process
CTNNA2	ENSG00000066032	GO:0042692	muscle cell differentiation	The process in which a relatively unspecialized cell acquires specialized features of a muscle cell. [CL:0000187, GOC:go_curators]	TAS	biological_process
CTNNA2	ENSG00000066032	GO:0060134	prepulse inhibition	The process in which a startle magnitude is reduced when the startling stimulus is preceded by a low-intensity prepulse. [GOC:dph, PMID:10341260]	IEA	biological_process
CTNNA2	ENSG00000066032	GO:0051823	regulation of synapse structural plasticity	Any process that modulates the frequency, rate or extent of synapse structural plasticity. Synapse structural plasticity is a type of cytoskeletal remodeling; this remodeling is induced by stimuli that can lead to long term potentiation and it can be activity-dependent or -independent. Examples of cytoskeletal changes include the formation of new spines and increase in spine size; this can be acc…	IEA	biological_process
CTNNA2	ENSG00000066032	GO:0048854	brain morphogenesis	The process in which the anatomical structures of the brain are generated and organized. The brain is one of the two components of the central nervous system and is the center of thought and emotion. It is responsible for the coordination and control of bodily activities and the interpretation of information from the senses (sight, hearing, smell, etc.). [GOC:dgh, GOC:jid]	IEA	biological_process
CTNNA2	ENSG00000066032	GO:0021942	radial glia guided migration of Purkinje cell	The migration of postmitotic a Purkinje cell along radial glial cells from the ventricular zone to the Purkinje cell layer. [GO_REF:0000021, GOC:cls, GOC:dgh, GOC:dph, GOC:jid, GOC:mtg_15jun06, PMID:15157725]	IEA	biological_process
CTNNA2	ENSG00000066032	GO:0005913	cell-cell adherens junction	An adherens junction which connects a cell to another cell. [GOC:hb]	IEA	cellular_component
CTNNA2	ENSG00000066032	GO:0048813	dendrite morphogenesis	The process in which the anatomical structures of a dendrite are generated and organized. A dendrite is a freely branching protoplasmic process of a nerve cell. [GOC:jl, ISBN:0198506732]	IEA	biological_process
CTNNA2	ENSG00000066032	GO:0045296	cadherin binding	Interacting selectively and non-covalently with cadherin, a type I membrane protein involved in cell adhesion. [GOC:bf]	IEA	molecular_function
CTNNA2	ENSG00000066032	GO:0030027	lamellipodium	A thin sheetlike process extended by the leading edge of a crawling fibroblast; contains a dense meshwork of actin filaments. [ISBN:0815316194]	IEA	cellular_component
CTNNA2	ENSG00000066032	GO:0015629	actin cytoskeleton	The part of the cytoskeleton (the internal framework of a cell) composed of actin and associated proteins. Includes actin cytoskeleton-associated complexes. [GOC:jl, ISBN:0395825172, ISBN:0815316194]	IEA	cellular_component
CTNNA2	ENSG00000066032	GO:0016337	cell-cell adhesion	The attachment of one cell to another cell via adhesion molecules. [GOC:hb]	ISS	biological_process
CTNNA2	ENSG00000066032	GO:0005912	adherens junction	A cell junction at which anchoring proteins (cadherins or integrins) extend through the plasma membrane and are attached to actin filaments. [GOC:mah, http://www.vivo.colostate.edu/hbooks/cmb/cells/pmemb/junctions_a.html, ISBN:0198506732]	ISS	cellular_component
CTNNA2	ENSG00000066032	GO:0005200	structural constituent of cytoskeleton	The action of a molecule that contributes to the structural integrity of a cytoskeletal structure. [GOC:mah]	NAS	molecular_function
CTNNA2	ENSG00000066032	GO:0016323	basolateral plasma membrane	The region of the plasma membrane that includes the basal end and sides of the cell. Often used in reference to animal polarized epithelial membranes, where the basal membrane is the part attached to the extracellular matrix, or in plant cells, where the basal membrane is defined with respect to the zygotic axis. [GOC:go_curators]	IEA	cellular_component
CTNNA2	ENSG00000066032	GO:0007155	cell adhesion	The attachment of a cell, either to another cell or to an underlying substrate such as the extracellular matrix, via cell adhesion molecules. [GOC:hb, GOC:pf]	IEA	biological_process
CTNNA2	ENSG00000066032	GO:0007409	axonogenesis	Generation of a long process of a neuron, that carries efferent (outgoing) action potentials from the cell body towards target cells. [GOC:jid, ISBN:0198506732]	IEA	biological_process
CTNNA2	ENSG00000066032	GO:0005829	cytosol	The part of the cytoplasm that does not contain organelles but which does contain other particulate matter, such as protein complexes. [GOC:hgd, GOC:jl]	TAS	cellular_component
CTNNA2	ENSG00000066032	GO:0005198	structural molecule activity	The action of a molecule that contributes to the structural integrity of a complex or assembly within or outside a cell. [GOC:mah]	IEA	molecular_function
CTNNA2	ENSG00000066032	GO:0030424	axon	The long process of a neuron that conducts nerve impulses, usually away from the cell body to the terminals and varicosities, which are sites of storage and release of neurotransmitter. [GOC:nln, ISBN:0198506732]	IEA	cellular_component
CTNNA2	ENSG00000066032	GO:0005737	cytoplasm	All of the contents of a cell excluding the plasma membrane and nucleus, but including other subcellular structures. [ISBN:0198547684]	IDA	cellular_component
CTNNA2	ENSG00000066032	GO:0005515	protein binding	Interacting selectively and non-covalently with any protein or protein complex (a complex of two or more proteins that may include other nonprotein molecules). [GOC:go_curators]	IPI	molecular_function
CTNNA2	ENSG00000066032	GO:0051149	positive regulation of muscle cell differentiation	Any process that activates or increases the frequency, rate or extent of muscle cell differentiation. [CL:0000187, GOC:ai]	TAS	biological_process
CTNNA2	ENSG00000066032	GO:0042692	muscle cell differentiation	The process in which a relatively unspecialized cell acquires specialized features of a muscle cell. [CL:0000187, GOC:go_curators]	TAS	biological_process
CTNNA2	ENSG00000066032	GO:0060134	prepulse inhibition	The process in which a startle magnitude is reduced when the startling stimulus is preceded by a low-intensity prepulse. [GOC:dph, PMID:10341260]	IEA	biological_process
CTNNA2	ENSG00000066032	GO:0051823	regulation of synapse structural plasticity	Any process that modulates the frequency, rate or extent of synapse structural plasticity. Synapse structural plasticity is a type of cytoskeletal remodeling; this remodeling is induced by stimuli that can lead to long term potentiation and it can be activity-dependent or -independent. Examples of cytoskeletal changes include the formation of new spines and increase in spine size; this can be acc…	IEA	biological_process
CTNNA2	ENSG00000066032	GO:0048854	brain morphogenesis	The process in which the anatomical structures of the brain are generated and organized. The brain is one of the two components of the central nervous system and is the center of thought and emotion. It is responsible for the coordination and control of bodily activities and the interpretation of information from the senses (sight, hearing, smell, etc.). [GOC:dgh, GOC:jid]	IEA	biological_process
CTNNA2	ENSG00000066032	GO:0021942	radial glia guided migration of Purkinje cell	The migration of postmitotic a Purkinje cell along radial glial cells from the ventricular zone to the Purkinje cell layer. [GO_REF:0000021, GOC:cls, GOC:dgh, GOC:dph, GOC:jid, GOC:mtg_15jun06, PMID:15157725]	IEA	biological_process
CTNNA2	ENSG00000066032	GO:0005913	cell-cell adherens junction	An adherens junction which connects a cell to another cell. [GOC:hb]	IEA	cellular_component
CTNNA2	ENSG00000066032	GO:0048813	dendrite morphogenesis	The process in which the anatomical structures of a dendrite are generated and organized. A dendrite is a freely branching protoplasmic process of a nerve cell. [GOC:jl, ISBN:0198506732]	IEA	biological_process
CTNNA2	ENSG00000066032	GO:0045296	cadherin binding	Interacting selectively and non-covalently with cadherin, a type I membrane protein involved in cell adhesion. [GOC:bf]	IEA	molecular_function
CTNNA2	ENSG00000066032	GO:0030027	lamellipodium	A thin sheetlike process extended by the leading edge of a crawling fibroblast; contains a dense meshwork of actin filaments. [ISBN:0815316194]	IEA	cellular_component
CTNNA2	ENSG00000066032	GO:0015629	actin cytoskeleton	The part of the cytoskeleton (the internal framework of a cell) composed of actin and associated proteins. Includes actin cytoskeleton-associated complexes. [GOC:jl, ISBN:0395825172, ISBN:0815316194]	IEA	cellular_component
CTNNA2	ENSG00000066032	GO:0016337	cell-cell adhesion	The attachment of one cell to another cell via adhesion molecules. [GOC:hb]	ISS	biological_process
CTNNA2	ENSG00000066032	GO:0005912	adherens junction	A cell junction at which anchoring proteins (cadherins or integrins) extend through the plasma membrane and are attached to actin filaments. [GOC:mah, http://www.vivo.colostate.edu/hbooks/cmb/cells/pmemb/junctions_a.html, ISBN:0198506732]	ISS	cellular_component
CTNNA2	ENSG00000066032	GO:0005200	structural constituent of cytoskeleton	The action of a molecule that contributes to the structural integrity of a cytoskeletal structure. [GOC:mah]	NAS	molecular_function
CTNNA2	ENSG00000066032	GO:0016323	basolateral plasma membrane	The region of the plasma membrane that includes the basal end and sides of the cell. Often used in reference to animal polarized epithelial membranes, where the basal membrane is the part attached to the extracellular matrix, or in plant cells, where the basal membrane is defined with respect to the zygotic axis. [GOC:go_curators]	IEA	cellular_component
CTNNA2	ENSG00000066032	GO:0007155	cell adhesion	The attachment of a cell, either to another cell or to an underlying substrate such as the extracellular matrix, via cell adhesion molecules. [GOC:hb, GOC:pf]	IEA	biological_process
CTNNA2	ENSG00000066032	GO:0007409	axonogenesis	Generation of a long process of a neuron, that carries efferent (outgoing) action potentials from the cell body towards target cells. [GOC:jid, ISBN:0198506732]	IEA	biological_process
CTNNA2	ENSG00000066032	GO:0005829	cytosol	The part of the cytoplasm that does not contain organelles but which does contain other particulate matter, such as protein complexes. [GOC:hgd, GOC:jl]	TAS	cellular_component
CTNNA2	ENSG00000066032	GO:0005198	structural molecule activity	The action of a molecule that contributes to the structural integrity of a complex or assembly within or outside a cell. [GOC:mah]	IEA	molecular_function
CTNNA2	ENSG00000066032	GO:0030424	axon	The long process of a neuron that conducts nerve impulses, usually away from the cell body to the terminals and varicosities, which are sites of storage and release of neurotransmitter. [GOC:nln, ISBN:0198506732]	IEA	cellular_component
CTNNA2	ENSG00000066032	GO:0005737	cytoplasm	All of the contents of a cell excluding the plasma membrane and nucleus, but including other subcellular structures. [ISBN:0198547684]	IDA	cellular_component
CTNNA2	ENSG00000066032	GO:0005515	protein binding	Interacting selectively and non-covalently with any protein or protein complex (a complex of two or more proteins that may include other nonprotein molecules). [GOC:go_curators]	IPI	molecular_function
CTNNA2	ENSG00000066032	GO:0051149	positive regulation of muscle cell differentiation	Any process that activates or increases the frequency, rate or extent of muscle cell differentiation. [CL:0000187, GOC:ai]	TAS	biological_process
CTNNA2	ENSG00000066032	GO:0042692	muscle cell differentiation	The process in which a relatively unspecialized cell acquires specialized features of a muscle cell. [CL:0000187, GOC:go_curators]	TAS	biological_process
CTNNA2	ENSG00000066032	GO:0060134	prepulse inhibition	The process in which a startle magnitude is reduced when the startling stimulus is preceded by a low-intensity prepulse. [GOC:dph, PMID:10341260]	IEA	biological_process
CTNNA2	ENSG00000066032	GO:0051823	regulation of synapse structural plasticity	Any process that modulates the frequency, rate or extent of synapse structural plasticity. Synapse structural plasticity is a type of cytoskeletal remodeling; this remodeling is induced by stimuli that can lead to long term potentiation and it can be activity-dependent or -independent. Examples of cytoskeletal changes include the formation of new spines and increase in spine size; this can be acc…	IEA	biological_process
CTNNA2	ENSG00000066032	GO:0048854	brain morphogenesis	The process in which the anatomical structures of the brain are generated and organized. The brain is one of the two components of the central nervous system and is the center of thought and emotion. It is responsible for the coordination and control of bodily activities and the interpretation of information from the senses (sight, hearing, smell, etc.). [GOC:dgh, GOC:jid]	IEA	biological_process
CTNNA2	ENSG00000066032	GO:0021942	radial glia guided migration of Purkinje cell	The migration of postmitotic a Purkinje cell along radial glial cells from the ventricular zone to the Purkinje cell layer. [GO_REF:0000021, GOC:cls, GOC:dgh, GOC:dph, GOC:jid, GOC:mtg_15jun06, PMID:15157725]	IEA	biological_process
CTNNA2	ENSG00000066032	GO:0005913	cell-cell adherens junction	An adherens junction which connects a cell to another cell. [GOC:hb]	IEA	cellular_component
CTNNA2	ENSG00000066032	GO:0048813	dendrite morphogenesis	The process in which the anatomical structures of a dendrite are generated and organized. A dendrite is a freely branching protoplasmic process of a nerve cell. [GOC:jl, ISBN:0198506732]	IEA	biological_process
CTNNA2	ENSG00000066032	GO:0045296	cadherin binding	Interacting selectively and non-covalently with cadherin, a type I membrane protein involved in cell adhesion. [GOC:bf]	IEA	molecular_function
CTNNA2	ENSG00000066032	GO:0030027	lamellipodium	A thin sheetlike process extended by the leading edge of a crawling fibroblast; contains a dense meshwork of actin filaments. [ISBN:0815316194]	IEA	cellular_component
CTNNA2	ENSG00000066032	GO:0015629	actin cytoskeleton	The part of the cytoskeleton (the internal framework of a cell) composed of actin and associated proteins. Includes actin cytoskeleton-associated complexes. [GOC:jl, ISBN:0395825172, ISBN:0815316194]	IEA	cellular_component
CTNNA2	ENSG00000066032	GO:0016337	cell-cell adhesion	The attachment of one cell to another cell via adhesion molecules. [GOC:hb]	ISS	biological_process
CTNNA2	ENSG00000066032	GO:0005912	adherens junction	A cell junction at which anchoring proteins (cadherins or integrins) extend through the plasma membrane and are attached to actin filaments. [GOC:mah, http://www.vivo.colostate.edu/hbooks/cmb/cells/pmemb/junctions_a.html, ISBN:0198506732]	ISS	cellular_component
CTNNA2	ENSG00000066032	GO:0005200	structural constituent of cytoskeleton	The action of a molecule that contributes to the structural integrity of a cytoskeletal structure. [GOC:mah]	NAS	molecular_function
CTNNA2	ENSG00000066032	GO:0016323	basolateral plasma membrane	The region of the plasma membrane that includes the basal end and sides of the cell. Often used in reference to animal polarized epithelial membranes, where the basal membrane is the part attached to the extracellular matrix, or in plant cells, where the basal membrane is defined with respect to the zygotic axis. [GOC:go_curators]	IEA	cellular_component
CTNNA2	ENSG00000066032	GO:0007155	cell adhesion	The attachment of a cell, either to another cell or to an underlying substrate such as the extracellular matrix, via cell adhesion molecules. [GOC:hb, GOC:pf]	IEA	biological_process
CTNNA2	ENSG00000066032	GO:0007409	axonogenesis	Generation of a long process of a neuron, that carries efferent (outgoing) action potentials from the cell body towards target cells. [GOC:jid, ISBN:0198506732]	IEA	biological_process
CTNNA2	ENSG00000066032	GO:0005829	cytosol	The part of the cytoplasm that does not contain organelles but which does contain other particulate matter, such as protein complexes. [GOC:hgd, GOC:jl]	TAS	cellular_component
CTNNA2	ENSG00000066032	GO:0005198	structural molecule activity	The action of a molecule that contributes to the structural integrity of a complex or assembly within or outside a cell. [GOC:mah]	IEA	molecular_function
CTNNA2	ENSG00000066032	GO:0030424	axon	The long process of a neuron that conducts nerve impulses, usually away from the cell body to the terminals and varicosities, which are sites of storage and release of neurotransmitter. [GOC:nln, ISBN:0198506732]	IEA	cellular_component
CTNNA2	ENSG00000066032	GO:0005737	cytoplasm	All of the contents of a cell excluding the plasma membrane and nucleus, but including other subcellular structures. [ISBN:0198547684]	IDA	cellular_component
CTNNA2	ENSG00000066032	GO:0005515	protein binding	Interacting selectively and non-covalently with any protein or protein complex (a complex of two or more proteins that may include other nonprotein molecules). [GOC:go_curators]	IPI	molecular_function
CXCL12	ENSG00000107562	GO:0045236	CXCR chemokine receptor binding	Interacting selectively and non-covalently with a chemokine receptor in the CXCR family. [GOC:ceb, PMID:11910892]	IDA	molecular_function
CXCL12	ENSG00000107562	GO:1902230	negative regulation of intrinsic apoptotic signaling pathway in response to DNA damage	Any process that stops, prevents or reduces the frequency, rate or extent of intrinsic apoptotic signaling pathway in response to DNA damage. [GOC:BHF, GOC:mtg_apoptosis, GOC:rl, GOC:TermGenie, PMID:15314165]	IDA	biological_process
CXCL12	ENSG00000107562	GO:0008064	regulation of actin polymerization or depolymerization	Any process that modulates the frequency, rate or extent of the assembly or disassembly of actin filaments by the addition or removal of actin monomers from a filament. [GOC:mah]	TAS	biological_process
CXCL12	ENSG00000107562	GO:2000107	negative regulation of leukocyte apoptotic process	Any process that stops, prevents, or reduces the frequency, rate or extent of leukocyte apoptotic process. [GOC:BHF, GOC:mtg_apoptosis]	IDA	biological_process
CXCL12	ENSG00000107562	GO:0001667	ameboidal cell migration	Cell migration that is accomplished by extension and retraction of a pseudopodium. [GOC:dph]	IEA	biological_process
CXCL12	ENSG00000107562	GO:0008015	blood circulation	The flow of blood through the body of an animal, enabling the transport of nutrients to the tissues and the removal of waste products. [GOC:mtg_heart, ISBN:0192800825]	TAS	biological_process
CXCL12	ENSG00000107562	GO:0090026	positive regulation of monocyte chemotaxis	Any process that increases the frequency, rate, or extent of monocyte chemotaxis. [GOC:dph, GOC:tb]	IDA	biological_process
CXCL12	ENSG00000107562	GO:0050930	induction of positive chemotaxis	Any process that initiates the directed movement of a motile cell or organism towards a higher concentration in a concentration gradient of a specific chemical. [GOC:ai]	IEA	biological_process
CXCL12	ENSG00000107562	GO:0042098	T cell proliferation	The expansion of a T cell population by cell division. Follows T cell activation. [GOC:jl]	IEA	biological_process
CXCL12	ENSG00000107562	GO:0042379	chemokine receptor binding	Interacting selectively and non-covalently with any chemokine receptor. [GOC:ai]	IMP	molecular_function
CXCL12	ENSG00000107562	GO:0070098	chemokine-mediated signaling pathway	A series of molecular signals initiated by the binding of a chemokine to a receptor on the surface of a cell, and ending with regulation of a downstream cellular process, e.g. transcription. [GOC:mah, GOC:signaling]	IDA	biological_process
CXCL12	ENSG00000107562	GO:0008009	chemokine activity	The function of a family of chemotactic pro-inflammatory activation-inducible cytokines acting primarily upon hemopoietic cells in immunoregulatory processes; all chemokines possess a number of conserved cysteine residues involved in intramolecular disulfide bond formation. [http://www.copewithcytokines.de/cope.cgi?key=Cytokines]	TAS	molecular_function
CXCL12	ENSG00000107562	GO:0008045	motor neuron axon guidance	The process in which the migration of an axon growth cone of a motor neuron is directed to a specific target site in response to a combination of attractive and repulsive cues. [CL:0000100, GOC:pr, ISBN:0878932437]	IEA	biological_process
CXCL12	ENSG00000107562	GO:0006874	cellular calcium ion homeostasis	Any process involved in the maintenance of an internal steady state of calcium ions at the level of a cell. [GOC:ceb, GOC:mah]	TAS	biological_process
CXCL12	ENSG00000107562	GO:0008354	germ cell migration	The orderly movement of a cell specialized to produce haploid gametes through the embryo from its site of production to the place where the gonads will form. [GOC:bf, GOC:jl]	IEA	biological_process
CXCL12	ENSG00000107562	GO:0001569	patterning of blood vessels	The process that regulates the coordinated growth and sprouting of blood vessels giving rise to the organized vascular system. [GOC:dph]	IEA	biological_process
CXCL12	ENSG00000107562	GO:0007281	germ cell development	The process whose specific outcome is the progression of an immature germ cell over time, from its formation to the mature structure (gamete). A germ cell is any reproductive cell in a multicellular organism. [GOC:go_curators]	IEA	biological_process
CXCL12	ENSG00000107562	GO:0006935	chemotaxis	The directed movement of a motile cell or organism, or the directed growth of a cell guided by a specific chemical concentration gradient. Movement may be towards a higher concentration (positive chemotaxis) or towards a lower concentration (negative chemotaxis). [ISBN:0198506732]	TAS	biological_process
CXCL12	ENSG00000107562	GO:0005102	receptor binding	Interacting selectively and non-covalently with one or more specific sites on a receptor molecule, a macromolecule that undergoes combination with a hormone, neurotransmitter, drug or intracellular messenger to initiate a change in cell function. [GOC:bf, GOC:ceb, ISBN:0198506732]	TAS	molecular_function
CXCL12	ENSG00000107562	GO:0009897	external side of plasma membrane	The side (leaflet) of the plasma membrane that is opposite to the side that faces the cytoplasm. [GOC:tb]	IEA	cellular_component
CXCL12	ENSG00000107562	GO:0007165	signal transduction	The cellular process in which a signal is conveyed to trigger a change in the activity or state of a cell. Signal transduction begins with reception of a signal (e.g. a ligand binding to a receptor or receptor activation by a stimulus such as light), or for signal transduction in the absence of ligand, signal-withdrawal or the activity of a constitutively active receptor. Signal transduction ends…	TAS	biological_process
CXCL12	ENSG00000107562	GO:0007155	cell adhesion	The attachment of a cell, either to another cell or to an underlying substrate such as the extracellular matrix, via cell adhesion molecules. [GOC:hb, GOC:pf]	TAS	biological_process
CXCL12	ENSG00000107562	GO:0006955	immune response	Any immune system process that functions in the calibrated response of an organism to a potential internal or invasive threat. [GO_REF:0000022, GOC:add, GOC:mtg_15nov05]	IEA	biological_process
CXCL12	ENSG00000107562	GO:0009615	response to virus	Any process that results in a change in state or activity of a cell or an organism (in terms of movement, secretion, enzyme production, gene expression, etc.) as a result of a stimulus from a virus. [GOC:hb]	TAS	biological_process
CXCL12	ENSG00000107562	GO:0007186	G-protein coupled receptor signaling pathway	A series of molecular signals that proceeds with an activated receptor promoting the exchange of GDP for GTP on the alpha-subunit of an associated heterotrimeric G-protein complex. The GTP-bound activated alpha-G-protein then dissociates from the beta- and gamma-subunits to further transmit the signal within the cell. The pathway begins with receptor-ligand interaction, or for basal GPCR signalin…	TAS	biological_process
CXCL12	ENSG00000107562	GO:0007420	brain development	The process whose specific outcome is the progression of the brain over time, from its formation to the mature structure. Brain development begins with patterning events in the neural tube and ends with the mature structure that is the center of thought and emotion. The brain is responsible for the coordination and control of bodily activities and the interpretation of information from the senses…	IEA	biological_process
CXCL12	ENSG00000107562	GO:0005615	extracellular space	That part of a multicellular organism outside the cells proper, usually taken to be outside the plasma membranes, and occupied by fluid. [ISBN:0198547684]	IEA	cellular_component
CXCL12	ENSG00000107562	GO:0008083	growth factor activity	The function that stimulates a cell to grow or proliferate. Most growth factors have other actions besides the induction of cell growth or proliferation. [ISBN:0815316194]	IEA	molecular_function
CXCL12	ENSG00000107562	GO:0005576	extracellular region	The space external to the outermost structure of a cell. For cells without external protective or external encapsulating structures this refers to space outside of the plasma membrane. This term covers the host cell environment outside an intracellular parasite. [GOC:go_curators]	TAS	cellular_component
CXCL12	ENSG00000107562	-	-	-	-	-
CXCL12	ENSG00000107562	GO:0045236	CXCR chemokine receptor binding	Interacting selectively and non-covalently with a chemokine receptor in the CXCR family. [GOC:ceb, PMID:11910892]	IDA	molecular_function
CXCL12	ENSG00000107562	GO:1902230	negative regulation of intrinsic apoptotic signaling pathway in response to DNA damage	Any process that stops, prevents or reduces the frequency, rate or extent of intrinsic apoptotic signaling pathway in response to DNA damage. [GOC:BHF, GOC:mtg_apoptosis, GOC:rl, GOC:TermGenie, PMID:15314165]	IDA	biological_process
CXCL12	ENSG00000107562	GO:0008064	regulation of actin polymerization or depolymerization	Any process that modulates the frequency, rate or extent of the assembly or disassembly of actin filaments by the addition or removal of actin monomers from a filament. [GOC:mah]	TAS	biological_process
CXCL12	ENSG00000107562	GO:2000107	negative regulation of leukocyte apoptotic process	Any process that stops, prevents, or reduces the frequency, rate or extent of leukocyte apoptotic process. [GOC:BHF, GOC:mtg_apoptosis]	IDA	biological_process
CXCL12	ENSG00000107562	GO:0001667	ameboidal cell migration	Cell migration that is accomplished by extension and retraction of a pseudopodium. [GOC:dph]	IEA	biological_process
CXCL12	ENSG00000107562	GO:0008015	blood circulation	The flow of blood through the body of an animal, enabling the transport of nutrients to the tissues and the removal of waste products. [GOC:mtg_heart, ISBN:0192800825]	TAS	biological_process
CXCL12	ENSG00000107562	GO:0090026	positive regulation of monocyte chemotaxis	Any process that increases the frequency, rate, or extent of monocyte chemotaxis. [GOC:dph, GOC:tb]	IDA	biological_process
CXCL12	ENSG00000107562	GO:0050930	induction of positive chemotaxis	Any process that initiates the directed movement of a motile cell or organism towards a higher concentration in a concentration gradient of a specific chemical. [GOC:ai]	IEA	biological_process
CXCL12	ENSG00000107562	GO:0042098	T cell proliferation	The expansion of a T cell population by cell division. Follows T cell activation. [GOC:jl]	IEA	biological_process
CXCL12	ENSG00000107562	GO:0042379	chemokine receptor binding	Interacting selectively and non-covalently with any chemokine receptor. [GOC:ai]	IMP	molecular_function
CXCL12	ENSG00000107562	GO:0070098	chemokine-mediated signaling pathway	A series of molecular signals initiated by the binding of a chemokine to a receptor on the surface of a cell, and ending with regulation of a downstream cellular process, e.g. transcription. [GOC:mah, GOC:signaling]	IDA	biological_process
CXCL12	ENSG00000107562	GO:0008009	chemokine activity	The function of a family of chemotactic pro-inflammatory activation-inducible cytokines acting primarily upon hemopoietic cells in immunoregulatory processes; all chemokines possess a number of conserved cysteine residues involved in intramolecular disulfide bond formation. [http://www.copewithcytokines.de/cope.cgi?key=Cytokines]	TAS	molecular_function
CXCL12	ENSG00000107562	GO:0008045	motor neuron axon guidance	The process in which the migration of an axon growth cone of a motor neuron is directed to a specific target site in response to a combination of attractive and repulsive cues. [CL:0000100, GOC:pr, ISBN:0878932437]	IEA	biological_process
CXCL12	ENSG00000107562	GO:0006874	cellular calcium ion homeostasis	Any process involved in the maintenance of an internal steady state of calcium ions at the level of a cell. [GOC:ceb, GOC:mah]	TAS	biological_process
CXCL12	ENSG00000107562	GO:0008354	germ cell migration	The orderly movement of a cell specialized to produce haploid gametes through the embryo from its site of production to the place where the gonads will form. [GOC:bf, GOC:jl]	IEA	biological_process
CXCL12	ENSG00000107562	GO:0001569	patterning of blood vessels	The process that regulates the coordinated growth and sprouting of blood vessels giving rise to the organized vascular system. [GOC:dph]	IEA	biological_process
CXCL12	ENSG00000107562	GO:0007281	germ cell development	The process whose specific outcome is the progression of an immature germ cell over time, from its formation to the mature structure (gamete). A germ cell is any reproductive cell in a multicellular organism. [GOC:go_curators]	IEA	biological_process
CXCL12	ENSG00000107562	GO:0006935	chemotaxis	The directed movement of a motile cell or organism, or the directed growth of a cell guided by a specific chemical concentration gradient. Movement may be towards a higher concentration (positive chemotaxis) or towards a lower concentration (negative chemotaxis). [ISBN:0198506732]	TAS	biological_process
CXCL12	ENSG00000107562	GO:0005102	receptor binding	Interacting selectively and non-covalently with one or more specific sites on a receptor molecule, a macromolecule that undergoes combination with a hormone, neurotransmitter, drug or intracellular messenger to initiate a change in cell function. [GOC:bf, GOC:ceb, ISBN:0198506732]	TAS	molecular_function
CXCL12	ENSG00000107562	GO:0009897	external side of plasma membrane	The side (leaflet) of the plasma membrane that is opposite to the side that faces the cytoplasm. [GOC:tb]	IEA	cellular_component
CXCL12	ENSG00000107562	GO:0007165	signal transduction	The cellular process in which a signal is conveyed to trigger a change in the activity or state of a cell. Signal transduction begins with reception of a signal (e.g. a ligand binding to a receptor or receptor activation by a stimulus such as light), or for signal transduction in the absence of ligand, signal-withdrawal or the activity of a constitutively active receptor. Signal transduction ends…	TAS	biological_process
CXCL12	ENSG00000107562	GO:0007155	cell adhesion	The attachment of a cell, either to another cell or to an underlying substrate such as the extracellular matrix, via cell adhesion molecules. [GOC:hb, GOC:pf]	TAS	biological_process
CXCL12	ENSG00000107562	GO:0006955	immune response	Any immune system process that functions in the calibrated response of an organism to a potential internal or invasive threat. [GO_REF:0000022, GOC:add, GOC:mtg_15nov05]	IEA	biological_process
CXCL12	ENSG00000107562	GO:0009615	response to virus	Any process that results in a change in state or activity of a cell or an organism (in terms of movement, secretion, enzyme production, gene expression, etc.) as a result of a stimulus from a virus. [GOC:hb]	TAS	biological_process
CXCL12	ENSG00000107562	GO:0007186	G-protein coupled receptor signaling pathway	A series of molecular signals that proceeds with an activated receptor promoting the exchange of GDP for GTP on the alpha-subunit of an associated heterotrimeric G-protein complex. The GTP-bound activated alpha-G-protein then dissociates from the beta- and gamma-subunits to further transmit the signal within the cell. The pathway begins with receptor-ligand interaction, or for basal GPCR signalin…	TAS	biological_process
CXCL12	ENSG00000107562	GO:0007420	brain development	The process whose specific outcome is the progression of the brain over time, from its formation to the mature structure. Brain development begins with patterning events in the neural tube and ends with the mature structure that is the center of thought and emotion. The brain is responsible for the coordination and control of bodily activities and the interpretation of information from the senses…	IEA	biological_process
CXCL12	ENSG00000107562	GO:0005615	extracellular space	That part of a multicellular organism outside the cells proper, usually taken to be outside the plasma membranes, and occupied by fluid. [ISBN:0198547684]	IEA	cellular_component
CXCL12	ENSG00000107562	GO:0008083	growth factor activity	The function that stimulates a cell to grow or proliferate. Most growth factors have other actions besides the induction of cell growth or proliferation. [ISBN:0815316194]	IEA	molecular_function
CXCL12	ENSG00000107562	GO:0005576	extracellular region	The space external to the outermost structure of a cell. For cells without external protective or external encapsulating structures this refers to space outside of the plasma membrane. This term covers the host cell environment outside an intracellular parasite. [GOC:go_curators]	TAS	cellular_component
CXCL12	ENSG00000107562	GO:0045236	CXCR chemokine receptor binding	Interacting selectively and non-covalently with a chemokine receptor in the CXCR family. [GOC:ceb, PMID:11910892]	IDA	molecular_function
CXCL12	ENSG00000107562	GO:1902230	negative regulation of intrinsic apoptotic signaling pathway in response to DNA damage	Any process that stops, prevents or reduces the frequency, rate or extent of intrinsic apoptotic signaling pathway in response to DNA damage. [GOC:BHF, GOC:mtg_apoptosis, GOC:rl, GOC:TermGenie, PMID:15314165]	IDA	biological_process
CXCL12	ENSG00000107562	GO:0008064	regulation of actin polymerization or depolymerization	Any process that modulates the frequency, rate or extent of the assembly or disassembly of actin filaments by the addition or removal of actin monomers from a filament. [GOC:mah]	TAS	biological_process
CXCL12	ENSG00000107562	GO:2000107	negative regulation of leukocyte apoptotic process	Any process that stops, prevents, or reduces the frequency, rate or extent of leukocyte apoptotic process. [GOC:BHF, GOC:mtg_apoptosis]	IDA	biological_process
CXCL12	ENSG00000107562	GO:0001667	ameboidal cell migration	Cell migration that is accomplished by extension and retraction of a pseudopodium. [GOC:dph]	IEA	biological_process
CXCL12	ENSG00000107562	GO:0008015	blood circulation	The flow of blood through the body of an animal, enabling the transport of nutrients to the tissues and the removal of waste products. [GOC:mtg_heart, ISBN:0192800825]	TAS	biological_process
CXCL12	ENSG00000107562	GO:0090026	positive regulation of monocyte chemotaxis	Any process that increases the frequency, rate, or extent of monocyte chemotaxis. [GOC:dph, GOC:tb]	IDA	biological_process
CXCL12	ENSG00000107562	GO:0050930	induction of positive chemotaxis	Any process that initiates the directed movement of a motile cell or organism towards a higher concentration in a concentration gradient of a specific chemical. [GOC:ai]	IEA	biological_process
CXCL12	ENSG00000107562	GO:0042098	T cell proliferation	The expansion of a T cell population by cell division. Follows T cell activation. [GOC:jl]	IEA	biological_process
CXCL12	ENSG00000107562	GO:0042379	chemokine receptor binding	Interacting selectively and non-covalently with any chemokine receptor. [GOC:ai]	IMP	molecular_function
CXCL12	ENSG00000107562	GO:0070098	chemokine-mediated signaling pathway	A series of molecular signals initiated by the binding of a chemokine to a receptor on the surface of a cell, and ending with regulation of a downstream cellular process, e.g. transcription. [GOC:mah, GOC:signaling]	IDA	biological_process
CXCL12	ENSG00000107562	GO:0008009	chemokine activity	The function of a family of chemotactic pro-inflammatory activation-inducible cytokines acting primarily upon hemopoietic cells in immunoregulatory processes; all chemokines possess a number of conserved cysteine residues involved in intramolecular disulfide bond formation. [http://www.copewithcytokines.de/cope.cgi?key=Cytokines]	TAS	molecular_function
CXCL12	ENSG00000107562	GO:0008045	motor neuron axon guidance	The process in which the migration of an axon growth cone of a motor neuron is directed to a specific target site in response to a combination of attractive and repulsive cues. [CL:0000100, GOC:pr, ISBN:0878932437]	IEA	biological_process
CXCL12	ENSG00000107562	GO:0006874	cellular calcium ion homeostasis	Any process involved in the maintenance of an internal steady state of calcium ions at the level of a cell. [GOC:ceb, GOC:mah]	TAS	biological_process
CXCL12	ENSG00000107562	GO:0008354	germ cell migration	The orderly movement of a cell specialized to produce haploid gametes through the embryo from its site of production to the place where the gonads will form. [GOC:bf, GOC:jl]	IEA	biological_process
CXCL12	ENSG00000107562	GO:0001569	patterning of blood vessels	The process that regulates the coordinated growth and sprouting of blood vessels giving rise to the organized vascular system. [GOC:dph]	IEA	biological_process
CXCL12	ENSG00000107562	GO:0007281	germ cell development	The process whose specific outcome is the progression of an immature germ cell over time, from its formation to the mature structure (gamete). A germ cell is any reproductive cell in a multicellular organism. [GOC:go_curators]	IEA	biological_process
CXCL12	ENSG00000107562	GO:0006935	chemotaxis	The directed movement of a motile cell or organism, or the directed growth of a cell guided by a specific chemical concentration gradient. Movement may be towards a higher concentration (positive chemotaxis) or towards a lower concentration (negative chemotaxis). [ISBN:0198506732]	TAS	biological_process
CXCL12	ENSG00000107562	GO:0005102	receptor binding	Interacting selectively and non-covalently with one or more specific sites on a receptor molecule, a macromolecule that undergoes combination with a hormone, neurotransmitter, drug or intracellular messenger to initiate a change in cell function. [GOC:bf, GOC:ceb, ISBN:0198506732]	TAS	molecular_function
CXCL12	ENSG00000107562	GO:0009897	external side of plasma membrane	The side (leaflet) of the plasma membrane that is opposite to the side that faces the cytoplasm. [GOC:tb]	IEA	cellular_component
CXCL12	ENSG00000107562	GO:0007165	signal transduction	The cellular process in which a signal is conveyed to trigger a change in the activity or state of a cell. Signal transduction begins with reception of a signal (e.g. a ligand binding to a receptor or receptor activation by a stimulus such as light), or for signal transduction in the absence of ligand, signal-withdrawal or the activity of a constitutively active receptor. Signal transduction ends…	TAS	biological_process
CXCL12	ENSG00000107562	GO:0007155	cell adhesion	The attachment of a cell, either to another cell or to an underlying substrate such as the extracellular matrix, via cell adhesion molecules. [GOC:hb, GOC:pf]	TAS	biological_process
CXCL12	ENSG00000107562	GO:0006955	immune response	Any immune system process that functions in the calibrated response of an organism to a potential internal or invasive threat. [GO_REF:0000022, GOC:add, GOC:mtg_15nov05]	IEA	biological_process
CXCL12	ENSG00000107562	GO:0009615	response to virus	Any process that results in a change in state or activity of a cell or an organism (in terms of movement, secretion, enzyme production, gene expression, etc.) as a result of a stimulus from a virus. [GOC:hb]	TAS	biological_process
CXCL12	ENSG00000107562	GO:0007186	G-protein coupled receptor signaling pathway	A series of molecular signals that proceeds with an activated receptor promoting the exchange of GDP for GTP on the alpha-subunit of an associated heterotrimeric G-protein complex. The GTP-bound activated alpha-G-protein then dissociates from the beta- and gamma-subunits to further transmit the signal within the cell. The pathway begins with receptor-ligand interaction, or for basal GPCR signalin…	TAS	biological_process
CXCL12	ENSG00000107562	GO:0007420	brain development	The process whose specific outcome is the progression of the brain over time, from its formation to the mature structure. Brain development begins with patterning events in the neural tube and ends with the mature structure that is the center of thought and emotion. The brain is responsible for the coordination and control of bodily activities and the interpretation of information from the senses…	IEA	biological_process
CXCL12	ENSG00000107562	GO:0005615	extracellular space	That part of a multicellular organism outside the cells proper, usually taken to be outside the plasma membranes, and occupied by fluid. [ISBN:0198547684]	IEA	cellular_component
CXCL12	ENSG00000107562	GO:0008083	growth factor activity	The function that stimulates a cell to grow or proliferate. Most growth factors have other actions besides the induction of cell growth or proliferation. [ISBN:0815316194]	IEA	molecular_function
CXCL12	ENSG00000107562	GO:0005576	extracellular region	The space external to the outermost structure of a cell. For cells without external protective or external encapsulating structures this refers to space outside of the plasma membrane. This term covers the host cell environment outside an intracellular parasite. [GOC:go_curators]	TAS	cellular_component
CXCL12	ENSG00000107562	GO:0045236	CXCR chemokine receptor binding	Interacting selectively and non-covalently with a chemokine receptor in the CXCR family. [GOC:ceb, PMID:11910892]	IDA	molecular_function
CXCL12	ENSG00000107562	GO:1902230	negative regulation of intrinsic apoptotic signaling pathway in response to DNA damage	Any process that stops, prevents or reduces the frequency, rate or extent of intrinsic apoptotic signaling pathway in response to DNA damage. [GOC:BHF, GOC:mtg_apoptosis, GOC:rl, GOC:TermGenie, PMID:15314165]	IDA	biological_process
CXCL12	ENSG00000107562	GO:0008064	regulation of actin polymerization or depolymerization	Any process that modulates the frequency, rate or extent of the assembly or disassembly of actin filaments by the addition or removal of actin monomers from a filament. [GOC:mah]	TAS	biological_process
CXCL12	ENSG00000107562	GO:2000107	negative regulation of leukocyte apoptotic process	Any process that stops, prevents, or reduces the frequency, rate or extent of leukocyte apoptotic process. [GOC:BHF, GOC:mtg_apoptosis]	IDA	biological_process
CXCL12	ENSG00000107562	GO:0001667	ameboidal cell migration	Cell migration that is accomplished by extension and retraction of a pseudopodium. [GOC:dph]	IEA	biological_process
CXCL12	ENSG00000107562	GO:0008015	blood circulation	The flow of blood through the body of an animal, enabling the transport of nutrients to the tissues and the removal of waste products. [GOC:mtg_heart, ISBN:0192800825]	TAS	biological_process
CXCL12	ENSG00000107562	GO:0090026	positive regulation of monocyte chemotaxis	Any process that increases the frequency, rate, or extent of monocyte chemotaxis. [GOC:dph, GOC:tb]	IDA	biological_process
CXCL12	ENSG00000107562	GO:0050930	induction of positive chemotaxis	Any process that initiates the directed movement of a motile cell or organism towards a higher concentration in a concentration gradient of a specific chemical. [GOC:ai]	IEA	biological_process
CXCL12	ENSG00000107562	GO:0042098	T cell proliferation	The expansion of a T cell population by cell division. Follows T cell activation. [GOC:jl]	IEA	biological_process
CXCL12	ENSG00000107562	GO:0042379	chemokine receptor binding	Interacting selectively and non-covalently with any chemokine receptor. [GOC:ai]	IMP	molecular_function
CXCL12	ENSG00000107562	GO:0070098	chemokine-mediated signaling pathway	A series of molecular signals initiated by the binding of a chemokine to a receptor on the surface of a cell, and ending with regulation of a downstream cellular process, e.g. transcription. [GOC:mah, GOC:signaling]	IDA	biological_process
CXCL12	ENSG00000107562	GO:0008009	chemokine activity	The function of a family of chemotactic pro-inflammatory activation-inducible cytokines acting primarily upon hemopoietic cells in immunoregulatory processes; all chemokines possess a number of conserved cysteine residues involved in intramolecular disulfide bond formation. [http://www.copewithcytokines.de/cope.cgi?key=Cytokines]	TAS	molecular_function
CXCL12	ENSG00000107562	GO:0008045	motor neuron axon guidance	The process in which the migration of an axon growth cone of a motor neuron is directed to a specific target site in response to a combination of attractive and repulsive cues. [CL:0000100, GOC:pr, ISBN:0878932437]	IEA	biological_process
CXCL12	ENSG00000107562	GO:0006874	cellular calcium ion homeostasis	Any process involved in the maintenance of an internal steady state of calcium ions at the level of a cell. [GOC:ceb, GOC:mah]	TAS	biological_process
CXCL12	ENSG00000107562	GO:0008354	germ cell migration	The orderly movement of a cell specialized to produce haploid gametes through the embryo from its site of production to the place where the gonads will form. [GOC:bf, GOC:jl]	IEA	biological_process
CXCL12	ENSG00000107562	GO:0001569	patterning of blood vessels	The process that regulates the coordinated growth and sprouting of blood vessels giving rise to the organized vascular system. [GOC:dph]	IEA	biological_process
CXCL12	ENSG00000107562	GO:0007281	germ cell development	The process whose specific outcome is the progression of an immature germ cell over time, from its formation to the mature structure (gamete). A germ cell is any reproductive cell in a multicellular organism. [GOC:go_curators]	IEA	biological_process
CXCL12	ENSG00000107562	GO:0006935	chemotaxis	The directed movement of a motile cell or organism, or the directed growth of a cell guided by a specific chemical concentration gradient. Movement may be towards a higher concentration (positive chemotaxis) or towards a lower concentration (negative chemotaxis). [ISBN:0198506732]	TAS	biological_process
CXCL12	ENSG00000107562	GO:0005102	receptor binding	Interacting selectively and non-covalently with one or more specific sites on a receptor molecule, a macromolecule that undergoes combination with a hormone, neurotransmitter, drug or intracellular messenger to initiate a change in cell function. [GOC:bf, GOC:ceb, ISBN:0198506732]	TAS	molecular_function
CXCL12	ENSG00000107562	GO:0009897	external side of plasma membrane	The side (leaflet) of the plasma membrane that is opposite to the side that faces the cytoplasm. [GOC:tb]	IEA	cellular_component
CXCL12	ENSG00000107562	GO:0007165	signal transduction	The cellular process in which a signal is conveyed to trigger a change in the activity or state of a cell. Signal transduction begins with reception of a signal (e.g. a ligand binding to a receptor or receptor activation by a stimulus such as light), or for signal transduction in the absence of ligand, signal-withdrawal or the activity of a constitutively active receptor. Signal transduction ends…	TAS	biological_process
CXCL12	ENSG00000107562	GO:0007155	cell adhesion	The attachment of a cell, either to another cell or to an underlying substrate such as the extracellular matrix, via cell adhesion molecules. [GOC:hb, GOC:pf]	TAS	biological_process
CXCL12	ENSG00000107562	GO:0006955	immune response	Any immune system process that functions in the calibrated response of an organism to a potential internal or invasive threat. [GO_REF:0000022, GOC:add, GOC:mtg_15nov05]	IEA	biological_process
CXCL12	ENSG00000107562	GO:0009615	response to virus	Any process that results in a change in state or activity of a cell or an organism (in terms of movement, secretion, enzyme production, gene expression, etc.) as a result of a stimulus from a virus. [GOC:hb]	TAS	biological_process
CXCL12	ENSG00000107562	GO:0007186	G-protein coupled receptor signaling pathway	A series of molecular signals that proceeds with an activated receptor promoting the exchange of GDP for GTP on the alpha-subunit of an associated heterotrimeric G-protein complex. The GTP-bound activated alpha-G-protein then dissociates from the beta- and gamma-subunits to further transmit the signal within the cell. The pathway begins with receptor-ligand interaction, or for basal GPCR signalin…	TAS	biological_process
CXCL12	ENSG00000107562	GO:0007420	brain development	The process whose specific outcome is the progression of the brain over time, from its formation to the mature structure. Brain development begins with patterning events in the neural tube and ends with the mature structure that is the center of thought and emotion. The brain is responsible for the coordination and control of bodily activities and the interpretation of information from the senses…	IEA	biological_process
CXCL12	ENSG00000107562	GO:0005615	extracellular space	That part of a multicellular organism outside the cells proper, usually taken to be outside the plasma membranes, and occupied by fluid. [ISBN:0198547684]	IEA	cellular_component
CXCL12	ENSG00000107562	GO:0008083	growth factor activity	The function that stimulates a cell to grow or proliferate. Most growth factors have other actions besides the induction of cell growth or proliferation. [ISBN:0815316194]	IEA	molecular_function
CXCL12	ENSG00000107562	GO:0005576	extracellular region	The space external to the outermost structure of a cell. For cells without external protective or external encapsulating structures this refers to space outside of the plasma membrane. This term covers the host cell environment outside an intracellular parasite. [GOC:go_curators]	TAS	cellular_component
CXCL12	ENSG00000107562	GO:0030334	regulation of cell migration	Any process that modulates the frequency, rate or extent of cell migration. [GOC:go_curators]	IEA	biological_process
CXCL12	ENSG00000107562	GO:0030335	positive regulation of cell migration	Any process that activates or increases the frequency, rate or extent of cell migration. [GOC:go_curators]	IEA	biological_process
CXCL12	ENSG00000107562	GO:0008009	chemokine activity	The function of a family of chemotactic pro-inflammatory activation-inducible cytokines acting primarily upon hemopoietic cells in immunoregulatory processes; all chemokines possess a number of conserved cysteine residues involved in intramolecular disulfide bond formation. [http://www.copewithcytokines.de/cope.cgi?key=Cytokines]	IEA	molecular_function
CXCL12	ENSG00000107562	GO:0048842	positive regulation of axon extension involved in axon guidance	Any process that activates, maintains or increases the frequency, rate or extent of axon extension involved in axon guidance. [GOC:devbiol]	IEA	biological_process
CXCL12	ENSG00000107562	GO:0033603	positive regulation of dopamine secretion	Any process that activates or increases the frequency, rate or extent of the regulated release of dopamine. [GOC:sl]	IEA	biological_process
CXCL12	ENSG00000107562	GO:0022029	telencephalon cell migration	The orderly movement of a cell from one site to another at least one of which is located in the telencephalon. [GO_REF:0000021, GOC:cls, GOC:curators, GOC:dgh, GOC:dph, GOC:jid, GOC:mtg_15jun06]	IEA	biological_process
CXCL12	ENSG00000107562	GO:0051924	regulation of calcium ion transport	Any process that modulates the frequency, rate or extent of the directed movement of calcium ions into, out of or within a cell, or between cells, by means of some agent such as a transporter or pore. [GOC:ai]	IEA	biological_process
CXCL12	ENSG00000107562	GO:0009314	response to radiation	Any process that results in a change in state or activity of a cell or an organism (in terms of movement, secretion, enzyme production, gene expression, etc.) as a result of an electromagnetic radiation stimulus. Electromagnetic radiation is a propagating wave in space with electric and magnetic components. These components oscillate at right angles to each other and to the direction of propagati…	IEA	biological_process
CXCL12	ENSG00000107562	GO:0009408	response to heat	Any process that results in a change in state or activity of a cell or an organism (in terms of movement, secretion, enzyme production, gene expression, etc.) as a result of a heat stimulus, a temperature stimulus above the optimal temperature for that organism. [GOC:lr]	IEA	biological_process
CXCL12	ENSG00000107562	GO:0001764	neuron migration	The characteristic movement of an immature neuron from germinal zones to specific positions where they will reside as they mature. [CL:0000540, GOC:go_curators]	IEA	biological_process
CXCL12	ENSG00000107562	GO:0043434	response to peptide hormone	Any process that results in a change in state or activity of a cell or an organism (in terms of movement, secretion, enzyme production, gene expression, etc.) as a result of a peptide hormone stimulus. A peptide hormone is any of a class of peptides that are secreted into the blood stream and have endocrine functions in living animals. [PMID:11027914, PMID:15134857, Wikipedia:Peptide_hormone]	IEA	biological_process
CXCL12	ENSG00000107562	GO:0031100	organ regeneration	The regrowth of a lost or destroyed organ. [GOC:mah]	IEA	biological_process
CXCL12	ENSG00000107562	GO:0001938	positive regulation of endothelial cell proliferation	Any process that activates or increases the rate or extent of endothelial cell proliferation. [GOC:add]	IEA	biological_process
CXCL12	ENSG00000107562	GO:0008344	adult locomotory behavior	Locomotory behavior in a fully developed and mature organism. [GOC:ai]	IEA	biological_process
CXCL12	ENSG00000107562	GO:0009612	response to mechanical stimulus	Any process that results in a change in state or activity of a cell or an organism (in terms of movement, secretion, enzyme production, gene expression, etc.) as a result of a mechanical stimulus. [GOC:hb]	IEA	biological_process
CXCL12	ENSG00000107562	GO:0045666	positive regulation of neuron differentiation	Any process that activates or increases the frequency, rate or extent of neuron differentiation. [GOC:go_curators]	IEA	biological_process
CXCL12	ENSG00000107562	GO:0001666	response to hypoxia	Any process that results in a change in state or activity of a cell or an organism (in terms of movement, secretion, enzyme production, gene expression, etc.) as a result of a stimulus indicating lowered oxygen tension. Hypoxia, defined as a decline in O2 levels below normoxic levels of 20.8 - 20.95%, results in metabolic adaptation at both the cellular and organismal level. [GOC:hjd]	IEA	biological_process
CXCL12	ENSG00000107562	GO:0005886	plasma membrane	The membrane surrounding a cell that separates the cell from its external environment. It consists of a phospholipid bilayer and associated proteins. [ISBN:0716731363]	IEA	cellular_component
CXCL12	ENSG00000107562	GO:0008284	positive regulation of cell proliferation	Any process that activates or increases the rate or extent of cell proliferation. [GOC:go_curators]	IEA	biological_process
CXCL12	ENSG00000107562	GO:0045236	CXCR chemokine receptor binding	Interacting selectively and non-covalently with a chemokine receptor in the CXCR family. [GOC:ceb, PMID:11910892]	IDA	molecular_function
CXCL12	ENSG00000107562	GO:1902230	negative regulation of intrinsic apoptotic signaling pathway in response to DNA damage	Any process that stops, prevents or reduces the frequency, rate or extent of intrinsic apoptotic signaling pathway in response to DNA damage. [GOC:BHF, GOC:mtg_apoptosis, GOC:rl, GOC:TermGenie, PMID:15314165]	IDA	biological_process
CXCL12	ENSG00000107562	GO:0008064	regulation of actin polymerization or depolymerization	Any process that modulates the frequency, rate or extent of the assembly or disassembly of actin filaments by the addition or removal of actin monomers from a filament. [GOC:mah]	TAS	biological_process
CXCL12	ENSG00000107562	GO:2000107	negative regulation of leukocyte apoptotic process	Any process that stops, prevents, or reduces the frequency, rate or extent of leukocyte apoptotic process. [GOC:BHF, GOC:mtg_apoptosis]	IDA	biological_process
CXCL12	ENSG00000107562	GO:0001667	ameboidal cell migration	Cell migration that is accomplished by extension and retraction of a pseudopodium. [GOC:dph]	IEA	biological_process
CXCL12	ENSG00000107562	GO:0008015	blood circulation	The flow of blood through the body of an animal, enabling the transport of nutrients to the tissues and the removal of waste products. [GOC:mtg_heart, ISBN:0192800825]	TAS	biological_process
CXCL12	ENSG00000107562	GO:0090026	positive regulation of monocyte chemotaxis	Any process that increases the frequency, rate, or extent of monocyte chemotaxis. [GOC:dph, GOC:tb]	IDA	biological_process
CXCL12	ENSG00000107562	GO:0050930	induction of positive chemotaxis	Any process that initiates the directed movement of a motile cell or organism towards a higher concentration in a concentration gradient of a specific chemical. [GOC:ai]	IEA	biological_process
CXCL12	ENSG00000107562	GO:0042098	T cell proliferation	The expansion of a T cell population by cell division. Follows T cell activation. [GOC:jl]	IEA	biological_process
CXCL12	ENSG00000107562	GO:0042379	chemokine receptor binding	Interacting selectively and non-covalently with any chemokine receptor. [GOC:ai]	IMP	molecular_function
CXCL12	ENSG00000107562	GO:0070098	chemokine-mediated signaling pathway	A series of molecular signals initiated by the binding of a chemokine to a receptor on the surface of a cell, and ending with regulation of a downstream cellular process, e.g. transcription. [GOC:mah, GOC:signaling]	IDA	biological_process
CXCL12	ENSG00000107562	GO:0008009	chemokine activity	The function of a family of chemotactic pro-inflammatory activation-inducible cytokines acting primarily upon hemopoietic cells in immunoregulatory processes; all chemokines possess a number of conserved cysteine residues involved in intramolecular disulfide bond formation. [http://www.copewithcytokines.de/cope.cgi?key=Cytokines]	TAS	molecular_function
CXCL12	ENSG00000107562	GO:0008045	motor neuron axon guidance	The process in which the migration of an axon growth cone of a motor neuron is directed to a specific target site in response to a combination of attractive and repulsive cues. [CL:0000100, GOC:pr, ISBN:0878932437]	IEA	biological_process
CXCL12	ENSG00000107562	GO:0006874	cellular calcium ion homeostasis	Any process involved in the maintenance of an internal steady state of calcium ions at the level of a cell. [GOC:ceb, GOC:mah]	TAS	biological_process
CXCL12	ENSG00000107562	GO:0008354	germ cell migration	The orderly movement of a cell specialized to produce haploid gametes through the embryo from its site of production to the place where the gonads will form. [GOC:bf, GOC:jl]	IEA	biological_process
CXCL12	ENSG00000107562	GO:0001569	patterning of blood vessels	The process that regulates the coordinated growth and sprouting of blood vessels giving rise to the organized vascular system. [GOC:dph]	IEA	biological_process
CXCL12	ENSG00000107562	GO:0007281	germ cell development	The process whose specific outcome is the progression of an immature germ cell over time, from its formation to the mature structure (gamete). A germ cell is any reproductive cell in a multicellular organism. [GOC:go_curators]	IEA	biological_process
CXCL12	ENSG00000107562	GO:0006935	chemotaxis	The directed movement of a motile cell or organism, or the directed growth of a cell guided by a specific chemical concentration gradient. Movement may be towards a higher concentration (positive chemotaxis) or towards a lower concentration (negative chemotaxis). [ISBN:0198506732]	TAS	biological_process
CXCL12	ENSG00000107562	GO:0005102	receptor binding	Interacting selectively and non-covalently with one or more specific sites on a receptor molecule, a macromolecule that undergoes combination with a hormone, neurotransmitter, drug or intracellular messenger to initiate a change in cell function. [GOC:bf, GOC:ceb, ISBN:0198506732]	TAS	molecular_function
CXCL12	ENSG00000107562	GO:0009897	external side of plasma membrane	The side (leaflet) of the plasma membrane that is opposite to the side that faces the cytoplasm. [GOC:tb]	IEA	cellular_component
CXCL12	ENSG00000107562	GO:0007165	signal transduction	The cellular process in which a signal is conveyed to trigger a change in the activity or state of a cell. Signal transduction begins with reception of a signal (e.g. a ligand binding to a receptor or receptor activation by a stimulus such as light), or for signal transduction in the absence of ligand, signal-withdrawal or the activity of a constitutively active receptor. Signal transduction ends…	TAS	biological_process
CXCL12	ENSG00000107562	GO:0007155	cell adhesion	The attachment of a cell, either to another cell or to an underlying substrate such as the extracellular matrix, via cell adhesion molecules. [GOC:hb, GOC:pf]	TAS	biological_process
CXCL12	ENSG00000107562	GO:0006955	immune response	Any immune system process that functions in the calibrated response of an organism to a potential internal or invasive threat. [GO_REF:0000022, GOC:add, GOC:mtg_15nov05]	IEA	biological_process
CXCL12	ENSG00000107562	GO:0009615	response to virus	Any process that results in a change in state or activity of a cell or an organism (in terms of movement, secretion, enzyme production, gene expression, etc.) as a result of a stimulus from a virus. [GOC:hb]	TAS	biological_process
CXCL12	ENSG00000107562	GO:0007186	G-protein coupled receptor signaling pathway	A series of molecular signals that proceeds with an activated receptor promoting the exchange of GDP for GTP on the alpha-subunit of an associated heterotrimeric G-protein complex. The GTP-bound activated alpha-G-protein then dissociates from the beta- and gamma-subunits to further transmit the signal within the cell. The pathway begins with receptor-ligand interaction, or for basal GPCR signalin…	TAS	biological_process
CXCL12	ENSG00000107562	GO:0007420	brain development	The process whose specific outcome is the progression of the brain over time, from its formation to the mature structure. Brain development begins with patterning events in the neural tube and ends with the mature structure that is the center of thought and emotion. The brain is responsible for the coordination and control of bodily activities and the interpretation of information from the senses…	IEA	biological_process
CXCL12	ENSG00000107562	GO:0005615	extracellular space	That part of a multicellular organism outside the cells proper, usually taken to be outside the plasma membranes, and occupied by fluid. [ISBN:0198547684]	IEA	cellular_component
CXCL12	ENSG00000107562	GO:0008083	growth factor activity	The function that stimulates a cell to grow or proliferate. Most growth factors have other actions besides the induction of cell growth or proliferation. [ISBN:0815316194]	IEA	molecular_function
CXCL12	ENSG00000107562	GO:0005576	extracellular region	The space external to the outermost structure of a cell. For cells without external protective or external encapsulating structures this refers to space outside of the plasma membrane. This term covers the host cell environment outside an intracellular parasite. [GOC:go_curators]	TAS	cellular_component
DAB2	ENSG00000153071	GO:0038024	cargo receptor activity	Combining selectively with an extracellular macromolecule and delivering the macromolecule into the cell via endocytosis. [GOC:bf, GOC:signaling, PMID:15239958]	IMP	molecular_function
DAB2	ENSG00000153071	GO:0035615	clathrin adaptor activity	The binding activity of a molecule that brings together clathrin and one or more other molecules, permitting them to function in a coordinated way. [GOC:BHF, PMID:15728179]	IMP	molecular_function
DAB2	ENSG00000153071	GO:0070022	transforming growth factor beta receptor homodimeric complex	A homodimeric receptor complex that consists of two TGF-beta receptor monomers. [GOC:mah, Reactome:REACT_7415, Reactome:REACT_7737]	IDA	cellular_component
DAB2	ENSG00000153071	GO:2000370	positive regulation of clathrin-mediated endocytosis	Any process that activates or increases the frequency, rate or extent of clathrin-mediated endocytosis. [GOC:BHF, GOC:mah]	IMP	biological_process
DAB2	ENSG00000153071	GO:0030665	clathrin-coated vesicle membrane	The lipid bilayer surrounding a clathrin-coated vesicle. [GOC:mah]	IEA	cellular_component
DAB2	ENSG00000153071	GO:0060391	positive regulation of SMAD protein import into nucleus	Any process that increases the rate, frequency or extent of SMAD protein import into the nucleus, i.e. the directed movement of a SMAD proteins from the cytoplasm into the nucleus. Pathway-restricted SMAD proteins and common-partner SMAD proteins are involved in the transforming growth factor beta receptor signaling pathways. [GOC:BHF, GOC:dph, GOC:tb]	IDA	biological_process
DAB2	ENSG00000153071	GO:0010718	positive regulation of epithelial to mesenchymal transition	Any process that increases the rate, frequency, or extent of epithelial to mesenchymal transition. Epithelial to mesenchymal transition is where an epithelial cell loses apical/basolateral polarity, severs intercellular adhesive junctions, degrades basement membrane components and becomes a migratory mesenchymal cell. [GOC:BHF, GOC:dph, GOC:tb]	IDA	biological_process
DAB2	ENSG00000153071	GO:0060766	negative regulation of androgen receptor signaling pathway	Any process that decreases the rate, frequency, or extent of the androgen receptor signaling pathway. [GOC:dph]	IMP	biological_process
DAB2	ENSG00000153071	GO:0010862	positive regulation of pathway-restricted SMAD protein phosphorylation	Any process that increases the rate, frequency or extent of pathway-restricted SMAD protein phosphorylation. Pathway-restricted SMAD proteins and common-partner SMAD proteins are involved in the transforming growth factor beta receptor signaling pathways. [GOC:dph, GOC:tb]	IDA	biological_process
DAB2	ENSG00000153071	GO:0005905	coated pit	A part of the endomembrane system in the form of an invagination of a membrane upon which a clathrin coat forms, and that can be converted by vesicle budding into a clathrin-coated vesicle. Coated pits form on the plasma membrane, where they are involved in receptor-mediated selective transport of many proteins and other macromolecules across the cell membrane, in the trans-Golgi network, and on …	IDA	cellular_component
DAB2	ENSG00000153071	GO:2000096	positive regulation of Wnt signaling pathway, planar cell polarity pathway	Any process that activates or increases the frequency, rate or extent of Wnt signaling pathway, planar cell polarity pathway. [GOC:BHF]	IMP	biological_process
DAB2	ENSG00000153071	GO:2001046	positive regulation of integrin-mediated signaling pathway	Any process that activates or increases the frequency, rate or extent of integrin-mediated signaling pathway. [GOC:obol]	IEA	biological_process
DAB2	ENSG00000153071	GO:0035612	AP-2 adaptor complex binding	Interacting selectively and non-covalently with the AP-2 adaptor complex. The AP-2 adaptor complex is a heterotetrameric AP-type membrane coat adaptor complex that consists of alpha, beta2, mu2 and sigma2 subunits and links clathrin to the membrane surface of a vesicle. In at least humans, the AP-2 complex can be heterogeneric due to the existence of multiple subunit isoforms encoded by different…	IEA	molecular_function
DAB2	ENSG00000153071	GO:0032968	positive regulation of transcription elongation from RNA polymerase II promoter	Any process that activates or increases the frequency, rate or extent of transcription elongation, the extension of an RNA molecule after transcription initiation and promoter clearance by the addition of ribonucleotides, catalyzed by RNA polymerase II. [GOC:mah, GOC:txnOH]	IEA	biological_process
DAB2	ENSG00000153071	GO:0007492	endoderm development	The process whose specific outcome is the progression of the endoderm over time, from its formation to the mature structure. The endoderm is the innermost germ layer that develops into the gastrointestinal tract, the lungs and associated tissues. [GOC:dph, GOC:tb]	IEA	biological_process
DAB2	ENSG00000153071	GO:0006907	pinocytosis	An endocytosis process that results in the uptake of liquid material by cells from their external environment; literally 'cell drinking'. Liquid is enclosed in vesicles, called pinosomes, formed by invagination of the plasma membrane. [ISBN:0198506732]	IEA	biological_process
DAB2	ENSG00000153071	GO:0005546	phosphatidylinositol-4,5-bisphosphate binding	Interacting selectively and non-covalently with phosphatidylinositol-4,5-bisphosphate, a derivative of phosphatidylinositol in which the inositol ring is phosphorylated at the 4' and 5' positions. [GOC:bf, GOC:jl]	IEA	molecular_function
DAB2	ENSG00000153071	GO:0001921	positive regulation of receptor recycling	Any process that activates or increases the frequency, rate or extent of receptor recycling. [GOC:add]	IEA	biological_process
DAB2	ENSG00000153071	GO:0030099	myeloid cell differentiation	The process in which a relatively unspecialized myeloid precursor cell acquires the specialized features of any cell of the myeloid leukocyte, megakaryocyte, thrombocyte, or erythrocyte lineages. [GOC:add, ISBN:0781735149]	IEA	biological_process
DAB2	ENSG00000153071	GO:0030511	positive regulation of transforming growth factor beta receptor signaling pathway	Any process that activates or increases the frequency, rate or extent of TGF-beta receptor signaling pathway activity. [GOC:go_curators]	IDA	biological_process
DAB2	ENSG00000153071	GO:0030276	clathrin binding	Interacting selectively and non-covalently with a clathrin heavy or light chain, the main components of the coat of coated vesicles and coated pits, and which also occurs in synaptic vesicles. [GOC:jl, GOC:mah, ISBN:0198506732]	IEA	molecular_function
DAB2	ENSG00000153071	GO:1900026	positive regulation of substrate adhesion-dependent cell spreading	Any process that activates or increases the frequency, rate or extent of substrate adhesion-dependent cell spreading. [GOC:TermGenie, GOC:yaf]	IEA	biological_process
DAB2	ENSG00000153071	GO:2000643	positive regulation of early endosome to late endosome transport	Any process that activates or increases the frequency, rate or extent of early endosome to late endosome transport. [GOC:BHF]	IMP	biological_process
DAB2	ENSG00000153071	GO:0045807	positive regulation of endocytosis	Any process that activates or increases the frequency, rate or extent of endocytosis. [GOC:go_curators]	IMP	biological_process
DAB2	ENSG00000153071	GO:0046332	SMAD binding	Interacting selectively and non-covalently with a SMAD signaling protein. [GOC:ai]	IDA	molecular_function
DAB2	ENSG00000153071	GO:0048268	clathrin coat assembly	The process that results in the assembly of clathrin triskelia into the ordered structure known as a clathrin cage. [GOC:jid, PMID:11460887, PMID:11977118, PMID:9531549]	IEA	biological_process
DAB2	ENSG00000153071	GO:0030132	clathrin coat of coated pit	The coat found on coated pits and the coated vesicles derived from coated pits; comprises clathrin and the AP-2 adaptor complex. [GOC:mah]	IEA	cellular_component
DAB2	ENSG00000153071	GO:0006898	receptor-mediated endocytosis	An endocytosis process in which cell surface receptors ensure specificity of transport. A specific receptor on the cell surface binds tightly to the extracellular macromolecule (the ligand) that it recognizes; the plasma-membrane region containing the receptor-ligand complex then undergoes endocytosis, forming a transport vesicle containing the receptor-ligand complex and excluding most other pla…	IMP	biological_process
DAB2	ENSG00000153071	GO:0005765	lysosomal membrane	The lipid bilayer surrounding the lysosome and separating its contents from the cell cytoplasm. [GOC:ai]	TAS	cellular_component
DAB2	ENSG00000153071	GO:0007257	activation of JUN kinase activity	The initiation of the activity of the inactive enzyme JUN kinase (JNK). [GOC:bf]	IEA	biological_process
DAB2	ENSG00000153071	GO:0000904	cell morphogenesis involved in differentiation	The change in form (cell shape and size) that occurs when relatively unspecialized cells, e.g. embryonic or regenerative cells, acquire specialized structural and/or functional features that characterize the cells, tissues, or organs of the mature organism or some other relatively stable phase of the organism's life history. [GOC:go_curators]	IEA	biological_process
DAB2	ENSG00000153071	GO:0007588	excretion	The elimination by an organism of the waste products that arise as a result of metabolic activity. These products include water, carbon dioxide (CO2), and nitrogenous compounds. [ISBN:0192801023]	IEA	biological_process
DAB2	ENSG00000153071	GO:0032091	negative regulation of protein binding	Any process that stops, prevents, or reduces the frequency, rate or extent of protein binding. [GOC:mah]	IMP	biological_process
DAB2	ENSG00000153071	GO:0030335	positive regulation of cell migration	Any process that activates or increases the frequency, rate or extent of cell migration. [GOC:go_curators]	IEA	biological_process
DAB2	ENSG00000153071	GO:0032436	positive regulation of proteasomal ubiquitin-dependent protein catabolic process	Any process that activates or increases the frequency, rate or extent of the breakdown of a protein or peptide by hydrolysis of its peptide bonds, initiated by the covalent attachment of ubiquitin, and mediated by the proteasome. [GOC:mah]	IMP	biological_process
DAB2	ENSG00000153071	GO:0008022	protein C-terminus binding	Interacting selectively and non-covalently with a protein C-terminus, the end of any peptide chain at which the 1-carboxy function of a constituent amino acid is not attached in peptide linkage to another amino-acid residue. [ISBN:0198506732]	IPI	molecular_function
DAB2	ENSG00000153071	GO:0001934	positive regulation of protein phosphorylation	Any process that activates or increases the frequency, rate or extent of addition of phosphate groups to amino acids within a protein. [GOC:hjd]	IMP	biological_process
DAB2	ENSG00000153071	GO:0090090	negative regulation of canonical Wnt signaling pathway	Any process that decreases the rate, frequency, or extent of the Wnt signaling pathway through beta-catenin, the series of molecular signals initiated by binding of a Wnt protein to a frizzled family receptor on the surface of the target cell, followed by propagation of the signal via beta-catenin, and ending with a change in transcription of target genes. [GOC:dph, GOC:tb]	IMP	biological_process
DAB2	ENSG00000153071	GO:0005178	integrin binding	Interacting selectively and non-covalently with an integrin. [GOC:ceb]	IEA	molecular_function
DAB2	ENSG00000153071	GO:0001701	in utero embryonic development	The process whose specific outcome is the progression of the embryo in the uterus over time, from formation of the zygote in the oviduct, to birth. An example of this process is found in Mus musculus. [GOC:go_curators, GOC:mtg_sensu]	IEA	biological_process
DAB2	ENSG00000153071	GO:0016324	apical plasma membrane	The region of the plasma membrane located at the apical end of the cell. [GOC:curators]	IEA	cellular_component
DAB2	ENSG00000153071	GO:0016055	Wnt signaling pathway	The series of molecular signals initiated by binding of a Wnt protein to a frizzled family receptor on the surface of the target cell and ending with a change in cell state. [GOC:dph, GOC:go_curators, PMID:11532397]	IEA	biological_process
DAB2	ENSG00000153071	GO:0071560	cellular response to transforming growth factor beta stimulus	Any process that results in a change in state or activity of a cell (in terms of movement, secretion, enzyme production, gene expression, etc.) as a result of a transforming growth factor beta stimulus. [GOC:ecd, PMID:15451575]	IEA	biological_process
DAB2	ENSG00000153071	GO:0015031	protein transport	The directed movement of proteins into, out of or within a cell, or between cells, by means of some agent such as a transporter or pore. [GOC:ai]	IEA	biological_process
DAB2	ENSG00000153071	GO:0045892	negative regulation of transcription, DNA-dependent	Any process that stops, prevents, or reduces the frequency, rate or extent of cellular DNA-dependent transcription. [GOC:go_curators, GOC:txnOH]	IMP	biological_process
DAB2	ENSG00000153071	GO:0043066	negative regulation of apoptotic process	Any process that stops, prevents, or reduces the frequency, rate or extent of cell death by apoptotic process. [GOC:jl, GOC:mtg_apoptosis]	IDA	biological_process
DAB2	ENSG00000153071	GO:0045893	positive regulation of transcription, DNA-dependent	Any process that activates or increases the frequency, rate or extent of cellular DNA-dependent transcription. [GOC:go_curators, GOC:txnOH]	IMP	biological_process
DAB2	ENSG00000153071	GO:0006915	apoptotic process	A programmed cell death process which begins when a cell receives an internal (e.g. DNA damage) or external signal (e.g. an extracellular death ligand), and proceeds through a series of biochemical events (signaling pathways) which typically lead to rounding-up of the cell, retraction of pseudopodes, reduction of cellular volume (pyknosis), chromatin condensation, nuclear fragmentation (karyorrhe…	IEA	biological_process
DAB2	ENSG00000153071	GO:0008283	cell proliferation	The multiplication or reproduction of cells, resulting in the expansion of a cell population. [GOC:mah, GOC:mb]	TAS	biological_process
DAB2	ENSG00000153071	GO:0005515	protein binding	Interacting selectively and non-covalently with any protein or protein complex (a complex of two or more proteins that may include other nonprotein molecules). [GOC:go_curators]	IPI	molecular_function
DAB2	ENSG00000153071	GO:0005886	plasma membrane	The membrane surrounding a cell that separates the cell from its external environment. It consists of a phospholipid bilayer and associated proteins. [ISBN:0716731363]	TAS	cellular_component
DAB2	ENSG00000153071	GO:0005634	nucleus	A membrane-bounded organelle of eukaryotic cells in which chromosomes are housed and replicated. In most cells, the nucleus contains all of the cell's chromosomes except the organellar chromosomes, and is the site of RNA synthesis and processing. In some species, or in specialized cell types, RNA metabolism or DNA replication may be absent. [GOC:go_curators]	IEA	cellular_component
DAB2	ENSG00000153071	GO:0038024	cargo receptor activity	Combining selectively with an extracellular macromolecule and delivering the macromolecule into the cell via endocytosis. [GOC:bf, GOC:signaling, PMID:15239958]	IMP	molecular_function
DAB2	ENSG00000153071	GO:0035615	clathrin adaptor activity	The binding activity of a molecule that brings together clathrin and one or more other molecules, permitting them to function in a coordinated way. [GOC:BHF, PMID:15728179]	IMP	molecular_function
DAB2	ENSG00000153071	GO:0070022	transforming growth factor beta receptor homodimeric complex	A homodimeric receptor complex that consists of two TGF-beta receptor monomers. [GOC:mah, Reactome:REACT_7415, Reactome:REACT_7737]	IDA	cellular_component
DAB2	ENSG00000153071	GO:2000370	positive regulation of clathrin-mediated endocytosis	Any process that activates or increases the frequency, rate or extent of clathrin-mediated endocytosis. [GOC:BHF, GOC:mah]	IMP	biological_process
DAB2	ENSG00000153071	GO:0030665	clathrin-coated vesicle membrane	The lipid bilayer surrounding a clathrin-coated vesicle. [GOC:mah]	IEA	cellular_component
DAB2	ENSG00000153071	GO:0060391	positive regulation of SMAD protein import into nucleus	Any process that increases the rate, frequency or extent of SMAD protein import into the nucleus, i.e. the directed movement of a SMAD proteins from the cytoplasm into the nucleus. Pathway-restricted SMAD proteins and common-partner SMAD proteins are involved in the transforming growth factor beta receptor signaling pathways. [GOC:BHF, GOC:dph, GOC:tb]	IDA	biological_process
DAB2	ENSG00000153071	GO:0010718	positive regulation of epithelial to mesenchymal transition	Any process that increases the rate, frequency, or extent of epithelial to mesenchymal transition. Epithelial to mesenchymal transition is where an epithelial cell loses apical/basolateral polarity, severs intercellular adhesive junctions, degrades basement membrane components and becomes a migratory mesenchymal cell. [GOC:BHF, GOC:dph, GOC:tb]	IDA	biological_process
DAB2	ENSG00000153071	GO:0060766	negative regulation of androgen receptor signaling pathway	Any process that decreases the rate, frequency, or extent of the androgen receptor signaling pathway. [GOC:dph]	IMP	biological_process
DAB2	ENSG00000153071	GO:0010862	positive regulation of pathway-restricted SMAD protein phosphorylation	Any process that increases the rate, frequency or extent of pathway-restricted SMAD protein phosphorylation. Pathway-restricted SMAD proteins and common-partner SMAD proteins are involved in the transforming growth factor beta receptor signaling pathways. [GOC:dph, GOC:tb]	IDA	biological_process
DAB2	ENSG00000153071	GO:0005905	coated pit	A part of the endomembrane system in the form of an invagination of a membrane upon which a clathrin coat forms, and that can be converted by vesicle budding into a clathrin-coated vesicle. Coated pits form on the plasma membrane, where they are involved in receptor-mediated selective transport of many proteins and other macromolecules across the cell membrane, in the trans-Golgi network, and on …	IDA	cellular_component
DAB2	ENSG00000153071	GO:2000096	positive regulation of Wnt signaling pathway, planar cell polarity pathway	Any process that activates or increases the frequency, rate or extent of Wnt signaling pathway, planar cell polarity pathway. [GOC:BHF]	IMP	biological_process
DAB2	ENSG00000153071	GO:2001046	positive regulation of integrin-mediated signaling pathway	Any process that activates or increases the frequency, rate or extent of integrin-mediated signaling pathway. [GOC:obol]	IEA	biological_process
DAB2	ENSG00000153071	GO:0035612	AP-2 adaptor complex binding	Interacting selectively and non-covalently with the AP-2 adaptor complex. The AP-2 adaptor complex is a heterotetrameric AP-type membrane coat adaptor complex that consists of alpha, beta2, mu2 and sigma2 subunits and links clathrin to the membrane surface of a vesicle. In at least humans, the AP-2 complex can be heterogeneric due to the existence of multiple subunit isoforms encoded by different…	IEA	molecular_function
DAB2	ENSG00000153071	GO:0032968	positive regulation of transcription elongation from RNA polymerase II promoter	Any process that activates or increases the frequency, rate or extent of transcription elongation, the extension of an RNA molecule after transcription initiation and promoter clearance by the addition of ribonucleotides, catalyzed by RNA polymerase II. [GOC:mah, GOC:txnOH]	IEA	biological_process
DAB2	ENSG00000153071	GO:0007492	endoderm development	The process whose specific outcome is the progression of the endoderm over time, from its formation to the mature structure. The endoderm is the innermost germ layer that develops into the gastrointestinal tract, the lungs and associated tissues. [GOC:dph, GOC:tb]	IEA	biological_process
DAB2	ENSG00000153071	GO:0006907	pinocytosis	An endocytosis process that results in the uptake of liquid material by cells from their external environment; literally 'cell drinking'. Liquid is enclosed in vesicles, called pinosomes, formed by invagination of the plasma membrane. [ISBN:0198506732]	IEA	biological_process
DAB2	ENSG00000153071	GO:0005546	phosphatidylinositol-4,5-bisphosphate binding	Interacting selectively and non-covalently with phosphatidylinositol-4,5-bisphosphate, a derivative of phosphatidylinositol in which the inositol ring is phosphorylated at the 4' and 5' positions. [GOC:bf, GOC:jl]	IEA	molecular_function
DAB2	ENSG00000153071	GO:0001921	positive regulation of receptor recycling	Any process that activates or increases the frequency, rate or extent of receptor recycling. [GOC:add]	IEA	biological_process
DAB2	ENSG00000153071	GO:0030099	myeloid cell differentiation	The process in which a relatively unspecialized myeloid precursor cell acquires the specialized features of any cell of the myeloid leukocyte, megakaryocyte, thrombocyte, or erythrocyte lineages. [GOC:add, ISBN:0781735149]	IEA	biological_process
DAB2	ENSG00000153071	GO:0030511	positive regulation of transforming growth factor beta receptor signaling pathway	Any process that activates or increases the frequency, rate or extent of TGF-beta receptor signaling pathway activity. [GOC:go_curators]	IDA	biological_process
DAB2	ENSG00000153071	GO:0030276	clathrin binding	Interacting selectively and non-covalently with a clathrin heavy or light chain, the main components of the coat of coated vesicles and coated pits, and which also occurs in synaptic vesicles. [GOC:jl, GOC:mah, ISBN:0198506732]	IEA	molecular_function
DAB2	ENSG00000153071	GO:1900026	positive regulation of substrate adhesion-dependent cell spreading	Any process that activates or increases the frequency, rate or extent of substrate adhesion-dependent cell spreading. [GOC:TermGenie, GOC:yaf]	IEA	biological_process
DAB2	ENSG00000153071	GO:2000643	positive regulation of early endosome to late endosome transport	Any process that activates or increases the frequency, rate or extent of early endosome to late endosome transport. [GOC:BHF]	IMP	biological_process
DAB2	ENSG00000153071	GO:0045807	positive regulation of endocytosis	Any process that activates or increases the frequency, rate or extent of endocytosis. [GOC:go_curators]	IMP	biological_process
DAB2	ENSG00000153071	GO:0046332	SMAD binding	Interacting selectively and non-covalently with a SMAD signaling protein. [GOC:ai]	IDA	molecular_function
DAB2	ENSG00000153071	GO:0048268	clathrin coat assembly	The process that results in the assembly of clathrin triskelia into the ordered structure known as a clathrin cage. [GOC:jid, PMID:11460887, PMID:11977118, PMID:9531549]	IEA	biological_process
DAB2	ENSG00000153071	GO:0030132	clathrin coat of coated pit	The coat found on coated pits and the coated vesicles derived from coated pits; comprises clathrin and the AP-2 adaptor complex. [GOC:mah]	IEA	cellular_component
DAB2	ENSG00000153071	GO:0006898	receptor-mediated endocytosis	An endocytosis process in which cell surface receptors ensure specificity of transport. A specific receptor on the cell surface binds tightly to the extracellular macromolecule (the ligand) that it recognizes; the plasma-membrane region containing the receptor-ligand complex then undergoes endocytosis, forming a transport vesicle containing the receptor-ligand complex and excluding most other pla…	IMP	biological_process
DAB2	ENSG00000153071	GO:0005765	lysosomal membrane	The lipid bilayer surrounding the lysosome and separating its contents from the cell cytoplasm. [GOC:ai]	TAS	cellular_component
DAB2	ENSG00000153071	GO:0007257	activation of JUN kinase activity	The initiation of the activity of the inactive enzyme JUN kinase (JNK). [GOC:bf]	IEA	biological_process
DAB2	ENSG00000153071	GO:0000904	cell morphogenesis involved in differentiation	The change in form (cell shape and size) that occurs when relatively unspecialized cells, e.g. embryonic or regenerative cells, acquire specialized structural and/or functional features that characterize the cells, tissues, or organs of the mature organism or some other relatively stable phase of the organism's life history. [GOC:go_curators]	IEA	biological_process
DAB2	ENSG00000153071	GO:0007588	excretion	The elimination by an organism of the waste products that arise as a result of metabolic activity. These products include water, carbon dioxide (CO2), and nitrogenous compounds. [ISBN:0192801023]	IEA	biological_process
DAB2	ENSG00000153071	GO:0032091	negative regulation of protein binding	Any process that stops, prevents, or reduces the frequency, rate or extent of protein binding. [GOC:mah]	IMP	biological_process
DAB2	ENSG00000153071	GO:0030335	positive regulation of cell migration	Any process that activates or increases the frequency, rate or extent of cell migration. [GOC:go_curators]	IEA	biological_process
DAB2	ENSG00000153071	GO:0032436	positive regulation of proteasomal ubiquitin-dependent protein catabolic process	Any process that activates or increases the frequency, rate or extent of the breakdown of a protein or peptide by hydrolysis of its peptide bonds, initiated by the covalent attachment of ubiquitin, and mediated by the proteasome. [GOC:mah]	IMP	biological_process
DAB2	ENSG00000153071	GO:0008022	protein C-terminus binding	Interacting selectively and non-covalently with a protein C-terminus, the end of any peptide chain at which the 1-carboxy function of a constituent amino acid is not attached in peptide linkage to another amino-acid residue. [ISBN:0198506732]	IPI	molecular_function
DAB2	ENSG00000153071	GO:0001934	positive regulation of protein phosphorylation	Any process that activates or increases the frequency, rate or extent of addition of phosphate groups to amino acids within a protein. [GOC:hjd]	IMP	biological_process
DAB2	ENSG00000153071	GO:0090090	negative regulation of canonical Wnt signaling pathway	Any process that decreases the rate, frequency, or extent of the Wnt signaling pathway through beta-catenin, the series of molecular signals initiated by binding of a Wnt protein to a frizzled family receptor on the surface of the target cell, followed by propagation of the signal via beta-catenin, and ending with a change in transcription of target genes. [GOC:dph, GOC:tb]	IMP	biological_process
DAB2	ENSG00000153071	GO:0005178	integrin binding	Interacting selectively and non-covalently with an integrin. [GOC:ceb]	IEA	molecular_function
DAB2	ENSG00000153071	GO:0001701	in utero embryonic development	The process whose specific outcome is the progression of the embryo in the uterus over time, from formation of the zygote in the oviduct, to birth. An example of this process is found in Mus musculus. [GOC:go_curators, GOC:mtg_sensu]	IEA	biological_process
DAB2	ENSG00000153071	GO:0016324	apical plasma membrane	The region of the plasma membrane located at the apical end of the cell. [GOC:curators]	IEA	cellular_component
DAB2	ENSG00000153071	GO:0016055	Wnt signaling pathway	The series of molecular signals initiated by binding of a Wnt protein to a frizzled family receptor on the surface of the target cell and ending with a change in cell state. [GOC:dph, GOC:go_curators, PMID:11532397]	IEA	biological_process
DAB2	ENSG00000153071	GO:0071560	cellular response to transforming growth factor beta stimulus	Any process that results in a change in state or activity of a cell (in terms of movement, secretion, enzyme production, gene expression, etc.) as a result of a transforming growth factor beta stimulus. [GOC:ecd, PMID:15451575]	IEA	biological_process
DAB2	ENSG00000153071	GO:0015031	protein transport	The directed movement of proteins into, out of or within a cell, or between cells, by means of some agent such as a transporter or pore. [GOC:ai]	IEA	biological_process
DAB2	ENSG00000153071	GO:0045892	negative regulation of transcription, DNA-dependent	Any process that stops, prevents, or reduces the frequency, rate or extent of cellular DNA-dependent transcription. [GOC:go_curators, GOC:txnOH]	IMP	biological_process
DAB2	ENSG00000153071	GO:0043066	negative regulation of apoptotic process	Any process that stops, prevents, or reduces the frequency, rate or extent of cell death by apoptotic process. [GOC:jl, GOC:mtg_apoptosis]	IDA	biological_process
DAB2	ENSG00000153071	GO:0045893	positive regulation of transcription, DNA-dependent	Any process that activates or increases the frequency, rate or extent of cellular DNA-dependent transcription. [GOC:go_curators, GOC:txnOH]	IMP	biological_process
DAB2	ENSG00000153071	GO:0006915	apoptotic process	A programmed cell death process which begins when a cell receives an internal (e.g. DNA damage) or external signal (e.g. an extracellular death ligand), and proceeds through a series of biochemical events (signaling pathways) which typically lead to rounding-up of the cell, retraction of pseudopodes, reduction of cellular volume (pyknosis), chromatin condensation, nuclear fragmentation (karyorrhe…	IEA	biological_process
DAB2	ENSG00000153071	GO:0008283	cell proliferation	The multiplication or reproduction of cells, resulting in the expansion of a cell population. [GOC:mah, GOC:mb]	TAS	biological_process
DAB2	ENSG00000153071	GO:0005515	protein binding	Interacting selectively and non-covalently with any protein or protein complex (a complex of two or more proteins that may include other nonprotein molecules). [GOC:go_curators]	IPI	molecular_function
DAB2	ENSG00000153071	GO:0005886	plasma membrane	The membrane surrounding a cell that separates the cell from its external environment. It consists of a phospholipid bilayer and associated proteins. [ISBN:0716731363]	TAS	cellular_component
DAB2	ENSG00000153071	GO:0005634	nucleus	A membrane-bounded organelle of eukaryotic cells in which chromosomes are housed and replicated. In most cells, the nucleus contains all of the cell's chromosomes except the organellar chromosomes, and is the site of RNA synthesis and processing. In some species, or in specialized cell types, RNA metabolism or DNA replication may be absent. [GOC:go_curators]	IEA	cellular_component
DAB2	ENSG00000153071	GO:2000370	positive regulation of clathrin-mediated endocytosis	Any process that activates or increases the frequency, rate or extent of clathrin-mediated endocytosis. [GOC:BHF, GOC:mah]	IEA	biological_process
DAB2	ENSG00000153071	GO:0038024	cargo receptor activity	Combining selectively with an extracellular macromolecule and delivering the macromolecule into the cell via endocytosis. [GOC:bf, GOC:signaling, PMID:15239958]	IEA	molecular_function
DAB2	ENSG00000153071	GO:0035615	clathrin adaptor activity	The binding activity of a molecule that brings together clathrin and one or more other molecules, permitting them to function in a coordinated way. [GOC:BHF, PMID:15728179]	IEA	molecular_function
DAB2	ENSG00000153071	GO:0010862	positive regulation of pathway-restricted SMAD protein phosphorylation	Any process that increases the rate, frequency or extent of pathway-restricted SMAD protein phosphorylation. Pathway-restricted SMAD proteins and common-partner SMAD proteins are involved in the transforming growth factor beta receptor signaling pathways. [GOC:dph, GOC:tb]	IEA	biological_process
DAB2	ENSG00000153071	GO:0010718	positive regulation of epithelial to mesenchymal transition	Any process that increases the rate, frequency, or extent of epithelial to mesenchymal transition. Epithelial to mesenchymal transition is where an epithelial cell loses apical/basolateral polarity, severs intercellular adhesive junctions, degrades basement membrane components and becomes a migratory mesenchymal cell. [GOC:BHF, GOC:dph, GOC:tb]	IEA	biological_process
DAB2	ENSG00000153071	GO:0045785	positive regulation of cell adhesion	Any process that activates or increases the frequency, rate or extent of cell adhesion. [GOC:go_curators]	IEA	biological_process
DAB2	ENSG00000153071	GO:0006898	receptor-mediated endocytosis	An endocytosis process in which cell surface receptors ensure specificity of transport. A specific receptor on the cell surface binds tightly to the extracellular macromolecule (the ligand) that it recognizes; the plasma-membrane region containing the receptor-ligand complex then undergoes endocytosis, forming a transport vesicle containing the receptor-ligand complex and excluding most other pla…	IEA	biological_process
DAB2	ENSG00000153071	GO:2001237	negative regulation of extrinsic apoptotic signaling pathway	Any process that stops, prevents or reduces the frequency, rate or extent of extrinsic apoptotic signaling pathway. [GOC:mtg_apoptosis]	IEA	biological_process
DAB2	ENSG00000153071	GO:0043066	negative regulation of apoptotic process	Any process that stops, prevents, or reduces the frequency, rate or extent of cell death by apoptotic process. [GOC:jl, GOC:mtg_apoptosis]	IEA	biological_process
DAB2	ENSG00000153071	GO:0035091	phosphatidylinositol binding	Interacting selectively and non-covalently with any inositol-containing glycerophospholipid, i.e. phosphatidylinositol (PtdIns) and its phosphorylated derivatives. [GOC:bf, ISBN:0198506732, PMID:11395417]	IEA	molecular_function
DAB2	ENSG00000153071	GO:0005737	cytoplasm	All of the contents of a cell excluding the plasma membrane and nucleus, but including other subcellular structures. [ISBN:0198547684]	IEA	cellular_component
DAB2	ENSG00000153071	GO:0005515	protein binding	Interacting selectively and non-covalently with any protein or protein complex (a complex of two or more proteins that may include other nonprotein molecules). [GOC:go_curators]	IEA	molecular_function
DAB2	ENSG00000153071	GO:0005886	plasma membrane	The membrane surrounding a cell that separates the cell from its external environment. It consists of a phospholipid bilayer and associated proteins. [ISBN:0716731363]	IEA	cellular_component
DAB2	ENSG00000153071	GO:0038024	cargo receptor activity	Combining selectively with an extracellular macromolecule and delivering the macromolecule into the cell via endocytosis. [GOC:bf, GOC:signaling, PMID:15239958]	IMP	molecular_function
DAB2	ENSG00000153071	GO:0035615	clathrin adaptor activity	The binding activity of a molecule that brings together clathrin and one or more other molecules, permitting them to function in a coordinated way. [GOC:BHF, PMID:15728179]	IMP	molecular_function
DAB2	ENSG00000153071	GO:0070022	transforming growth factor beta receptor homodimeric complex	A homodimeric receptor complex that consists of two TGF-beta receptor monomers. [GOC:mah, Reactome:REACT_7415, Reactome:REACT_7737]	IDA	cellular_component
DAB2	ENSG00000153071	GO:2000370	positive regulation of clathrin-mediated endocytosis	Any process that activates or increases the frequency, rate or extent of clathrin-mediated endocytosis. [GOC:BHF, GOC:mah]	IMP	biological_process
DAB2	ENSG00000153071	GO:0030665	clathrin-coated vesicle membrane	The lipid bilayer surrounding a clathrin-coated vesicle. [GOC:mah]	IEA	cellular_component
DAB2	ENSG00000153071	GO:0060391	positive regulation of SMAD protein import into nucleus	Any process that increases the rate, frequency or extent of SMAD protein import into the nucleus, i.e. the directed movement of a SMAD proteins from the cytoplasm into the nucleus. Pathway-restricted SMAD proteins and common-partner SMAD proteins are involved in the transforming growth factor beta receptor signaling pathways. [GOC:BHF, GOC:dph, GOC:tb]	IDA	biological_process
DAB2	ENSG00000153071	GO:0010718	positive regulation of epithelial to mesenchymal transition	Any process that increases the rate, frequency, or extent of epithelial to mesenchymal transition. Epithelial to mesenchymal transition is where an epithelial cell loses apical/basolateral polarity, severs intercellular adhesive junctions, degrades basement membrane components and becomes a migratory mesenchymal cell. [GOC:BHF, GOC:dph, GOC:tb]	IDA	biological_process
DAB2	ENSG00000153071	GO:0060766	negative regulation of androgen receptor signaling pathway	Any process that decreases the rate, frequency, or extent of the androgen receptor signaling pathway. [GOC:dph]	IMP	biological_process
DAB2	ENSG00000153071	GO:0010862	positive regulation of pathway-restricted SMAD protein phosphorylation	Any process that increases the rate, frequency or extent of pathway-restricted SMAD protein phosphorylation. Pathway-restricted SMAD proteins and common-partner SMAD proteins are involved in the transforming growth factor beta receptor signaling pathways. [GOC:dph, GOC:tb]	IDA	biological_process
DAB2	ENSG00000153071	GO:0005905	coated pit	A part of the endomembrane system in the form of an invagination of a membrane upon which a clathrin coat forms, and that can be converted by vesicle budding into a clathrin-coated vesicle. Coated pits form on the plasma membrane, where they are involved in receptor-mediated selective transport of many proteins and other macromolecules across the cell membrane, in the trans-Golgi network, and on …	IDA	cellular_component
DAB2	ENSG00000153071	GO:2000096	positive regulation of Wnt signaling pathway, planar cell polarity pathway	Any process that activates or increases the frequency, rate or extent of Wnt signaling pathway, planar cell polarity pathway. [GOC:BHF]	IMP	biological_process
DAB2	ENSG00000153071	GO:2001046	positive regulation of integrin-mediated signaling pathway	Any process that activates or increases the frequency, rate or extent of integrin-mediated signaling pathway. [GOC:obol]	IEA	biological_process
DAB2	ENSG00000153071	GO:0035612	AP-2 adaptor complex binding	Interacting selectively and non-covalently with the AP-2 adaptor complex. The AP-2 adaptor complex is a heterotetrameric AP-type membrane coat adaptor complex that consists of alpha, beta2, mu2 and sigma2 subunits and links clathrin to the membrane surface of a vesicle. In at least humans, the AP-2 complex can be heterogeneric due to the existence of multiple subunit isoforms encoded by different…	IEA	molecular_function
DAB2	ENSG00000153071	GO:0032968	positive regulation of transcription elongation from RNA polymerase II promoter	Any process that activates or increases the frequency, rate or extent of transcription elongation, the extension of an RNA molecule after transcription initiation and promoter clearance by the addition of ribonucleotides, catalyzed by RNA polymerase II. [GOC:mah, GOC:txnOH]	IEA	biological_process
DAB2	ENSG00000153071	GO:0007492	endoderm development	The process whose specific outcome is the progression of the endoderm over time, from its formation to the mature structure. The endoderm is the innermost germ layer that develops into the gastrointestinal tract, the lungs and associated tissues. [GOC:dph, GOC:tb]	IEA	biological_process
DAB2	ENSG00000153071	GO:0006907	pinocytosis	An endocytosis process that results in the uptake of liquid material by cells from their external environment; literally 'cell drinking'. Liquid is enclosed in vesicles, called pinosomes, formed by invagination of the plasma membrane. [ISBN:0198506732]	IEA	biological_process
DAB2	ENSG00000153071	GO:0005546	phosphatidylinositol-4,5-bisphosphate binding	Interacting selectively and non-covalently with phosphatidylinositol-4,5-bisphosphate, a derivative of phosphatidylinositol in which the inositol ring is phosphorylated at the 4' and 5' positions. [GOC:bf, GOC:jl]	IEA	molecular_function
DAB2	ENSG00000153071	GO:0001921	positive regulation of receptor recycling	Any process that activates or increases the frequency, rate or extent of receptor recycling. [GOC:add]	IEA	biological_process
DAB2	ENSG00000153071	GO:0030099	myeloid cell differentiation	The process in which a relatively unspecialized myeloid precursor cell acquires the specialized features of any cell of the myeloid leukocyte, megakaryocyte, thrombocyte, or erythrocyte lineages. [GOC:add, ISBN:0781735149]	IEA	biological_process
DAB2	ENSG00000153071	GO:0030511	positive regulation of transforming growth factor beta receptor signaling pathway	Any process that activates or increases the frequency, rate or extent of TGF-beta receptor signaling pathway activity. [GOC:go_curators]	IDA	biological_process
DAB2	ENSG00000153071	GO:0030276	clathrin binding	Interacting selectively and non-covalently with a clathrin heavy or light chain, the main components of the coat of coated vesicles and coated pits, and which also occurs in synaptic vesicles. [GOC:jl, GOC:mah, ISBN:0198506732]	IEA	molecular_function
DAB2	ENSG00000153071	GO:1900026	positive regulation of substrate adhesion-dependent cell spreading	Any process that activates or increases the frequency, rate or extent of substrate adhesion-dependent cell spreading. [GOC:TermGenie, GOC:yaf]	IEA	biological_process
DAB2	ENSG00000153071	GO:2000643	positive regulation of early endosome to late endosome transport	Any process that activates or increases the frequency, rate or extent of early endosome to late endosome transport. [GOC:BHF]	IMP	biological_process
DAB2	ENSG00000153071	GO:0045807	positive regulation of endocytosis	Any process that activates or increases the frequency, rate or extent of endocytosis. [GOC:go_curators]	IMP	biological_process
DAB2	ENSG00000153071	GO:0046332	SMAD binding	Interacting selectively and non-covalently with a SMAD signaling protein. [GOC:ai]	IDA	molecular_function
DAB2	ENSG00000153071	GO:0048268	clathrin coat assembly	The process that results in the assembly of clathrin triskelia into the ordered structure known as a clathrin cage. [GOC:jid, PMID:11460887, PMID:11977118, PMID:9531549]	IEA	biological_process
DAB2	ENSG00000153071	GO:0030132	clathrin coat of coated pit	The coat found on coated pits and the coated vesicles derived from coated pits; comprises clathrin and the AP-2 adaptor complex. [GOC:mah]	IEA	cellular_component
DAB2	ENSG00000153071	GO:0006898	receptor-mediated endocytosis	An endocytosis process in which cell surface receptors ensure specificity of transport. A specific receptor on the cell surface binds tightly to the extracellular macromolecule (the ligand) that it recognizes; the plasma-membrane region containing the receptor-ligand complex then undergoes endocytosis, forming a transport vesicle containing the receptor-ligand complex and excluding most other pla…	IMP	biological_process
DAB2	ENSG00000153071	GO:0005765	lysosomal membrane	The lipid bilayer surrounding the lysosome and separating its contents from the cell cytoplasm. [GOC:ai]	TAS	cellular_component
DAB2	ENSG00000153071	GO:0007257	activation of JUN kinase activity	The initiation of the activity of the inactive enzyme JUN kinase (JNK). [GOC:bf]	IEA	biological_process
DAB2	ENSG00000153071	GO:0000904	cell morphogenesis involved in differentiation	The change in form (cell shape and size) that occurs when relatively unspecialized cells, e.g. embryonic or regenerative cells, acquire specialized structural and/or functional features that characterize the cells, tissues, or organs of the mature organism or some other relatively stable phase of the organism's life history. [GOC:go_curators]	IEA	biological_process
DAB2	ENSG00000153071	GO:0007588	excretion	The elimination by an organism of the waste products that arise as a result of metabolic activity. These products include water, carbon dioxide (CO2), and nitrogenous compounds. [ISBN:0192801023]	IEA	biological_process
DAB2	ENSG00000153071	GO:0032091	negative regulation of protein binding	Any process that stops, prevents, or reduces the frequency, rate or extent of protein binding. [GOC:mah]	IMP	biological_process
DAB2	ENSG00000153071	GO:0030335	positive regulation of cell migration	Any process that activates or increases the frequency, rate or extent of cell migration. [GOC:go_curators]	IEA	biological_process
DAB2	ENSG00000153071	GO:0032436	positive regulation of proteasomal ubiquitin-dependent protein catabolic process	Any process that activates or increases the frequency, rate or extent of the breakdown of a protein or peptide by hydrolysis of its peptide bonds, initiated by the covalent attachment of ubiquitin, and mediated by the proteasome. [GOC:mah]	IMP	biological_process
DAB2	ENSG00000153071	GO:0008022	protein C-terminus binding	Interacting selectively and non-covalently with a protein C-terminus, the end of any peptide chain at which the 1-carboxy function of a constituent amino acid is not attached in peptide linkage to another amino-acid residue. [ISBN:0198506732]	IPI	molecular_function
DAB2	ENSG00000153071	GO:0001934	positive regulation of protein phosphorylation	Any process that activates or increases the frequency, rate or extent of addition of phosphate groups to amino acids within a protein. [GOC:hjd]	IMP	biological_process
DAB2	ENSG00000153071	GO:0090090	negative regulation of canonical Wnt signaling pathway	Any process that decreases the rate, frequency, or extent of the Wnt signaling pathway through beta-catenin, the series of molecular signals initiated by binding of a Wnt protein to a frizzled family receptor on the surface of the target cell, followed by propagation of the signal via beta-catenin, and ending with a change in transcription of target genes. [GOC:dph, GOC:tb]	IMP	biological_process
DAB2	ENSG00000153071	GO:0005178	integrin binding	Interacting selectively and non-covalently with an integrin. [GOC:ceb]	IEA	molecular_function
DAB2	ENSG00000153071	GO:0001701	in utero embryonic development	The process whose specific outcome is the progression of the embryo in the uterus over time, from formation of the zygote in the oviduct, to birth. An example of this process is found in Mus musculus. [GOC:go_curators, GOC:mtg_sensu]	IEA	biological_process
DAB2	ENSG00000153071	GO:0016324	apical plasma membrane	The region of the plasma membrane located at the apical end of the cell. [GOC:curators]	IEA	cellular_component
DAB2	ENSG00000153071	GO:0016055	Wnt signaling pathway	The series of molecular signals initiated by binding of a Wnt protein to a frizzled family receptor on the surface of the target cell and ending with a change in cell state. [GOC:dph, GOC:go_curators, PMID:11532397]	IEA	biological_process
DAB2	ENSG00000153071	GO:0071560	cellular response to transforming growth factor beta stimulus	Any process that results in a change in state or activity of a cell (in terms of movement, secretion, enzyme production, gene expression, etc.) as a result of a transforming growth factor beta stimulus. [GOC:ecd, PMID:15451575]	IEA	biological_process
DAB2	ENSG00000153071	GO:0015031	protein transport	The directed movement of proteins into, out of or within a cell, or between cells, by means of some agent such as a transporter or pore. [GOC:ai]	IEA	biological_process
DAB2	ENSG00000153071	GO:0045892	negative regulation of transcription, DNA-dependent	Any process that stops, prevents, or reduces the frequency, rate or extent of cellular DNA-dependent transcription. [GOC:go_curators, GOC:txnOH]	IMP	biological_process
DAB2	ENSG00000153071	GO:0043066	negative regulation of apoptotic process	Any process that stops, prevents, or reduces the frequency, rate or extent of cell death by apoptotic process. [GOC:jl, GOC:mtg_apoptosis]	IDA	biological_process
DAB2	ENSG00000153071	GO:0045893	positive regulation of transcription, DNA-dependent	Any process that activates or increases the frequency, rate or extent of cellular DNA-dependent transcription. [GOC:go_curators, GOC:txnOH]	IMP	biological_process
DAB2	ENSG00000153071	GO:0006915	apoptotic process	A programmed cell death process which begins when a cell receives an internal (e.g. DNA damage) or external signal (e.g. an extracellular death ligand), and proceeds through a series of biochemical events (signaling pathways) which typically lead to rounding-up of the cell, retraction of pseudopodes, reduction of cellular volume (pyknosis), chromatin condensation, nuclear fragmentation (karyorrhe…	IEA	biological_process
DAB2	ENSG00000153071	GO:0008283	cell proliferation	The multiplication or reproduction of cells, resulting in the expansion of a cell population. [GOC:mah, GOC:mb]	TAS	biological_process
DAB2	ENSG00000153071	GO:0005515	protein binding	Interacting selectively and non-covalently with any protein or protein complex (a complex of two or more proteins that may include other nonprotein molecules). [GOC:go_curators]	IPI	molecular_function
DAB2	ENSG00000153071	GO:0005886	plasma membrane	The membrane surrounding a cell that separates the cell from its external environment. It consists of a phospholipid bilayer and associated proteins. [ISBN:0716731363]	TAS	cellular_component
DAB2	ENSG00000153071	GO:0005634	nucleus	A membrane-bounded organelle of eukaryotic cells in which chromosomes are housed and replicated. In most cells, the nucleus contains all of the cell's chromosomes except the organellar chromosomes, and is the site of RNA synthesis and processing. In some species, or in specialized cell types, RNA metabolism or DNA replication may be absent. [GOC:go_curators]	IEA	cellular_component
DAB2	ENSG00000153071	GO:2001046	positive regulation of integrin-mediated signaling pathway	Any process that activates or increases the frequency, rate or extent of integrin-mediated signaling pathway. [GOC:obol]	IEA	biological_process
DAB2	ENSG00000153071	GO:0035612	AP-2 adaptor complex binding	Interacting selectively and non-covalently with the AP-2 adaptor complex. The AP-2 adaptor complex is a heterotetrameric AP-type membrane coat adaptor complex that consists of alpha, beta2, mu2 and sigma2 subunits and links clathrin to the membrane surface of a vesicle. In at least humans, the AP-2 complex can be heterogeneric due to the existence of multiple subunit isoforms encoded by different…	IEA	molecular_function
DAB2	ENSG00000153071	GO:0032968	positive regulation of transcription elongation from RNA polymerase II promoter	Any process that activates or increases the frequency, rate or extent of transcription elongation, the extension of an RNA molecule after transcription initiation and promoter clearance by the addition of ribonucleotides, catalyzed by RNA polymerase II. [GOC:mah, GOC:txnOH]	IEA	biological_process
DAB2	ENSG00000153071	GO:0007492	endoderm development	The process whose specific outcome is the progression of the endoderm over time, from its formation to the mature structure. The endoderm is the innermost germ layer that develops into the gastrointestinal tract, the lungs and associated tissues. [GOC:dph, GOC:tb]	IEA	biological_process
DAB2	ENSG00000153071	GO:0006907	pinocytosis	An endocytosis process that results in the uptake of liquid material by cells from their external environment; literally 'cell drinking'. Liquid is enclosed in vesicles, called pinosomes, formed by invagination of the plasma membrane. [ISBN:0198506732]	IEA	biological_process
DAB2	ENSG00000153071	GO:0005546	phosphatidylinositol-4,5-bisphosphate binding	Interacting selectively and non-covalently with phosphatidylinositol-4,5-bisphosphate, a derivative of phosphatidylinositol in which the inositol ring is phosphorylated at the 4' and 5' positions. [GOC:bf, GOC:jl]	IEA	molecular_function
DAB2	ENSG00000153071	GO:0001921	positive regulation of receptor recycling	Any process that activates or increases the frequency, rate or extent of receptor recycling. [GOC:add]	IEA	biological_process
DAB2	ENSG00000153071	GO:0030099	myeloid cell differentiation	The process in which a relatively unspecialized myeloid precursor cell acquires the specialized features of any cell of the myeloid leukocyte, megakaryocyte, thrombocyte, or erythrocyte lineages. [GOC:add, ISBN:0781735149]	IEA	biological_process
DAB2	ENSG00000153071	GO:0030276	clathrin binding	Interacting selectively and non-covalently with a clathrin heavy or light chain, the main components of the coat of coated vesicles and coated pits, and which also occurs in synaptic vesicles. [GOC:jl, GOC:mah, ISBN:0198506732]	IEA	molecular_function
DAB2	ENSG00000153071	GO:1900026	positive regulation of substrate adhesion-dependent cell spreading	Any process that activates or increases the frequency, rate or extent of substrate adhesion-dependent cell spreading. [GOC:TermGenie, GOC:yaf]	IEA	biological_process
DAB2	ENSG00000153071	GO:0048268	clathrin coat assembly	The process that results in the assembly of clathrin triskelia into the ordered structure known as a clathrin cage. [GOC:jid, PMID:11460887, PMID:11977118, PMID:9531549]	IEA	biological_process
DAB2	ENSG00000153071	GO:0030132	clathrin coat of coated pit	The coat found on coated pits and the coated vesicles derived from coated pits; comprises clathrin and the AP-2 adaptor complex. [GOC:mah]	IEA	cellular_component
DAB2	ENSG00000153071	GO:0007257	activation of JUN kinase activity	The initiation of the activity of the inactive enzyme JUN kinase (JNK). [GOC:bf]	IEA	biological_process
DAB2	ENSG00000153071	GO:0000904	cell morphogenesis involved in differentiation	The change in form (cell shape and size) that occurs when relatively unspecialized cells, e.g. embryonic or regenerative cells, acquire specialized structural and/or functional features that characterize the cells, tissues, or organs of the mature organism or some other relatively stable phase of the organism's life history. [GOC:go_curators]	IEA	biological_process
DAB2	ENSG00000153071	GO:0007588	excretion	The elimination by an organism of the waste products that arise as a result of metabolic activity. These products include water, carbon dioxide (CO2), and nitrogenous compounds. [ISBN:0192801023]	IEA	biological_process
DAB2	ENSG00000153071	GO:0030335	positive regulation of cell migration	Any process that activates or increases the frequency, rate or extent of cell migration. [GOC:go_curators]	IEA	biological_process
DAB2	ENSG00000153071	GO:0005178	integrin binding	Interacting selectively and non-covalently with an integrin. [GOC:ceb]	IEA	molecular_function
DAB2	ENSG00000153071	GO:0001701	in utero embryonic development	The process whose specific outcome is the progression of the embryo in the uterus over time, from formation of the zygote in the oviduct, to birth. An example of this process is found in Mus musculus. [GOC:go_curators, GOC:mtg_sensu]	IEA	biological_process
DAB2	ENSG00000153071	GO:0016324	apical plasma membrane	The region of the plasma membrane located at the apical end of the cell. [GOC:curators]	IEA	cellular_component
DAB2	ENSG00000153071	GO:0071560	cellular response to transforming growth factor beta stimulus	Any process that results in a change in state or activity of a cell (in terms of movement, secretion, enzyme production, gene expression, etc.) as a result of a transforming growth factor beta stimulus. [GOC:ecd, PMID:15451575]	IEA	biological_process
DAB2	ENSG00000153071	GO:0005515	protein binding	Interacting selectively and non-covalently with any protein or protein complex (a complex of two or more proteins that may include other nonprotein molecules). [GOC:go_curators]	IEA	molecular_function
DAB2	ENSG00000153071	GO:0005634	nucleus	A membrane-bounded organelle of eukaryotic cells in which chromosomes are housed and replicated. In most cells, the nucleus contains all of the cell's chromosomes except the organellar chromosomes, and is the site of RNA synthesis and processing. In some species, or in specialized cell types, RNA metabolism or DNA replication may be absent. [GOC:go_curators]	IEA	cellular_component
DAB2	ENSG00000153071	GO:2001046	positive regulation of integrin-mediated signaling pathway	Any process that activates or increases the frequency, rate or extent of integrin-mediated signaling pathway. [GOC:obol]	IEA	biological_process
DAB2	ENSG00000153071	GO:0035612	AP-2 adaptor complex binding	Interacting selectively and non-covalently with the AP-2 adaptor complex. The AP-2 adaptor complex is a heterotetrameric AP-type membrane coat adaptor complex that consists of alpha, beta2, mu2 and sigma2 subunits and links clathrin to the membrane surface of a vesicle. In at least humans, the AP-2 complex can be heterogeneric due to the existence of multiple subunit isoforms encoded by different…	IEA	molecular_function
DAB2	ENSG00000153071	GO:0032968	positive regulation of transcription elongation from RNA polymerase II promoter	Any process that activates or increases the frequency, rate or extent of transcription elongation, the extension of an RNA molecule after transcription initiation and promoter clearance by the addition of ribonucleotides, catalyzed by RNA polymerase II. [GOC:mah, GOC:txnOH]	IEA	biological_process
DAB2	ENSG00000153071	GO:0007492	endoderm development	The process whose specific outcome is the progression of the endoderm over time, from its formation to the mature structure. The endoderm is the innermost germ layer that develops into the gastrointestinal tract, the lungs and associated tissues. [GOC:dph, GOC:tb]	IEA	biological_process
DAB2	ENSG00000153071	GO:0006907	pinocytosis	An endocytosis process that results in the uptake of liquid material by cells from their external environment; literally 'cell drinking'. Liquid is enclosed in vesicles, called pinosomes, formed by invagination of the plasma membrane. [ISBN:0198506732]	IEA	biological_process
DAB2	ENSG00000153071	GO:0005546	phosphatidylinositol-4,5-bisphosphate binding	Interacting selectively and non-covalently with phosphatidylinositol-4,5-bisphosphate, a derivative of phosphatidylinositol in which the inositol ring is phosphorylated at the 4' and 5' positions. [GOC:bf, GOC:jl]	IEA	molecular_function
DAB2	ENSG00000153071	GO:0001921	positive regulation of receptor recycling	Any process that activates or increases the frequency, rate or extent of receptor recycling. [GOC:add]	IEA	biological_process
DAB2	ENSG00000153071	GO:0030099	myeloid cell differentiation	The process in which a relatively unspecialized myeloid precursor cell acquires the specialized features of any cell of the myeloid leukocyte, megakaryocyte, thrombocyte, or erythrocyte lineages. [GOC:add, ISBN:0781735149]	IEA	biological_process
DAB2	ENSG00000153071	GO:0030276	clathrin binding	Interacting selectively and non-covalently with a clathrin heavy or light chain, the main components of the coat of coated vesicles and coated pits, and which also occurs in synaptic vesicles. [GOC:jl, GOC:mah, ISBN:0198506732]	IEA	molecular_function
DAB2	ENSG00000153071	GO:1900026	positive regulation of substrate adhesion-dependent cell spreading	Any process that activates or increases the frequency, rate or extent of substrate adhesion-dependent cell spreading. [GOC:TermGenie, GOC:yaf]	IEA	biological_process
DAB2	ENSG00000153071	GO:0048268	clathrin coat assembly	The process that results in the assembly of clathrin triskelia into the ordered structure known as a clathrin cage. [GOC:jid, PMID:11460887, PMID:11977118, PMID:9531549]	IEA	biological_process
DAB2	ENSG00000153071	GO:0030132	clathrin coat of coated pit	The coat found on coated pits and the coated vesicles derived from coated pits; comprises clathrin and the AP-2 adaptor complex. [GOC:mah]	IEA	cellular_component
DAB2	ENSG00000153071	GO:0007257	activation of JUN kinase activity	The initiation of the activity of the inactive enzyme JUN kinase (JNK). [GOC:bf]	IEA	biological_process
DAB2	ENSG00000153071	GO:0000904	cell morphogenesis involved in differentiation	The change in form (cell shape and size) that occurs when relatively unspecialized cells, e.g. embryonic or regenerative cells, acquire specialized structural and/or functional features that characterize the cells, tissues, or organs of the mature organism or some other relatively stable phase of the organism's life history. [GOC:go_curators]	IEA	biological_process
DAB2	ENSG00000153071	GO:0007588	excretion	The elimination by an organism of the waste products that arise as a result of metabolic activity. These products include water, carbon dioxide (CO2), and nitrogenous compounds. [ISBN:0192801023]	IEA	biological_process
DAB2	ENSG00000153071	GO:0030335	positive regulation of cell migration	Any process that activates or increases the frequency, rate or extent of cell migration. [GOC:go_curators]	IEA	biological_process
DAB2	ENSG00000153071	GO:0005178	integrin binding	Interacting selectively and non-covalently with an integrin. [GOC:ceb]	IEA	molecular_function
DAB2	ENSG00000153071	GO:0001701	in utero embryonic development	The process whose specific outcome is the progression of the embryo in the uterus over time, from formation of the zygote in the oviduct, to birth. An example of this process is found in Mus musculus. [GOC:go_curators, GOC:mtg_sensu]	IEA	biological_process
DAB2	ENSG00000153071	GO:0016324	apical plasma membrane	The region of the plasma membrane located at the apical end of the cell. [GOC:curators]	IEA	cellular_component
DAB2	ENSG00000153071	GO:0071560	cellular response to transforming growth factor beta stimulus	Any process that results in a change in state or activity of a cell (in terms of movement, secretion, enzyme production, gene expression, etc.) as a result of a transforming growth factor beta stimulus. [GOC:ecd, PMID:15451575]	IEA	biological_process
DAB2	ENSG00000153071	GO:0005634	nucleus	A membrane-bounded organelle of eukaryotic cells in which chromosomes are housed and replicated. In most cells, the nucleus contains all of the cell's chromosomes except the organellar chromosomes, and is the site of RNA synthesis and processing. In some species, or in specialized cell types, RNA metabolism or DNA replication may be absent. [GOC:go_curators]	IEA	cellular_component
DAB2	ENSG00000153071	GO:2001046	positive regulation of integrin-mediated signaling pathway	Any process that activates or increases the frequency, rate or extent of integrin-mediated signaling pathway. [GOC:obol]	IEA	biological_process
DAB2	ENSG00000153071	GO:0035612	AP-2 adaptor complex binding	Interacting selectively and non-covalently with the AP-2 adaptor complex. The AP-2 adaptor complex is a heterotetrameric AP-type membrane coat adaptor complex that consists of alpha, beta2, mu2 and sigma2 subunits and links clathrin to the membrane surface of a vesicle. In at least humans, the AP-2 complex can be heterogeneric due to the existence of multiple subunit isoforms encoded by different…	IEA	molecular_function
DAB2	ENSG00000153071	GO:0032968	positive regulation of transcription elongation from RNA polymerase II promoter	Any process that activates or increases the frequency, rate or extent of transcription elongation, the extension of an RNA molecule after transcription initiation and promoter clearance by the addition of ribonucleotides, catalyzed by RNA polymerase II. [GOC:mah, GOC:txnOH]	IEA	biological_process
DAB2	ENSG00000153071	GO:0007492	endoderm development	The process whose specific outcome is the progression of the endoderm over time, from its formation to the mature structure. The endoderm is the innermost germ layer that develops into the gastrointestinal tract, the lungs and associated tissues. [GOC:dph, GOC:tb]	IEA	biological_process
DAB2	ENSG00000153071	GO:0006907	pinocytosis	An endocytosis process that results in the uptake of liquid material by cells from their external environment; literally 'cell drinking'. Liquid is enclosed in vesicles, called pinosomes, formed by invagination of the plasma membrane. [ISBN:0198506732]	IEA	biological_process
DAB2	ENSG00000153071	GO:0005546	phosphatidylinositol-4,5-bisphosphate binding	Interacting selectively and non-covalently with phosphatidylinositol-4,5-bisphosphate, a derivative of phosphatidylinositol in which the inositol ring is phosphorylated at the 4' and 5' positions. [GOC:bf, GOC:jl]	IEA	molecular_function
DAB2	ENSG00000153071	GO:0001921	positive regulation of receptor recycling	Any process that activates or increases the frequency, rate or extent of receptor recycling. [GOC:add]	IEA	biological_process
DAB2	ENSG00000153071	GO:0030099	myeloid cell differentiation	The process in which a relatively unspecialized myeloid precursor cell acquires the specialized features of any cell of the myeloid leukocyte, megakaryocyte, thrombocyte, or erythrocyte lineages. [GOC:add, ISBN:0781735149]	IEA	biological_process
DAB2	ENSG00000153071	GO:0030276	clathrin binding	Interacting selectively and non-covalently with a clathrin heavy or light chain, the main components of the coat of coated vesicles and coated pits, and which also occurs in synaptic vesicles. [GOC:jl, GOC:mah, ISBN:0198506732]	IEA	molecular_function
DAB2	ENSG00000153071	GO:1900026	positive regulation of substrate adhesion-dependent cell spreading	Any process that activates or increases the frequency, rate or extent of substrate adhesion-dependent cell spreading. [GOC:TermGenie, GOC:yaf]	IEA	biological_process
DAB2	ENSG00000153071	GO:0048268	clathrin coat assembly	The process that results in the assembly of clathrin triskelia into the ordered structure known as a clathrin cage. [GOC:jid, PMID:11460887, PMID:11977118, PMID:9531549]	IEA	biological_process
DAB2	ENSG00000153071	GO:0030132	clathrin coat of coated pit	The coat found on coated pits and the coated vesicles derived from coated pits; comprises clathrin and the AP-2 adaptor complex. [GOC:mah]	IEA	cellular_component
DAB2	ENSG00000153071	GO:0007257	activation of JUN kinase activity	The initiation of the activity of the inactive enzyme JUN kinase (JNK). [GOC:bf]	IEA	biological_process
DAB2	ENSG00000153071	GO:0000904	cell morphogenesis involved in differentiation	The change in form (cell shape and size) that occurs when relatively unspecialized cells, e.g. embryonic or regenerative cells, acquire specialized structural and/or functional features that characterize the cells, tissues, or organs of the mature organism or some other relatively stable phase of the organism's life history. [GOC:go_curators]	IEA	biological_process
DAB2	ENSG00000153071	GO:0007588	excretion	The elimination by an organism of the waste products that arise as a result of metabolic activity. These products include water, carbon dioxide (CO2), and nitrogenous compounds. [ISBN:0192801023]	IEA	biological_process
DAB2	ENSG00000153071	GO:0030335	positive regulation of cell migration	Any process that activates or increases the frequency, rate or extent of cell migration. [GOC:go_curators]	IEA	biological_process
DAB2	ENSG00000153071	GO:0005178	integrin binding	Interacting selectively and non-covalently with an integrin. [GOC:ceb]	IEA	molecular_function
DAB2	ENSG00000153071	GO:0001701	in utero embryonic development	The process whose specific outcome is the progression of the embryo in the uterus over time, from formation of the zygote in the oviduct, to birth. An example of this process is found in Mus musculus. [GOC:go_curators, GOC:mtg_sensu]	IEA	biological_process
DAB2	ENSG00000153071	GO:0016324	apical plasma membrane	The region of the plasma membrane located at the apical end of the cell. [GOC:curators]	IEA	cellular_component
DAB2	ENSG00000153071	GO:0071560	cellular response to transforming growth factor beta stimulus	Any process that results in a change in state or activity of a cell (in terms of movement, secretion, enzyme production, gene expression, etc.) as a result of a transforming growth factor beta stimulus. [GOC:ecd, PMID:15451575]	IEA	biological_process
DAB2	ENSG00000153071	GO:0005634	nucleus	A membrane-bounded organelle of eukaryotic cells in which chromosomes are housed and replicated. In most cells, the nucleus contains all of the cell's chromosomes except the organellar chromosomes, and is the site of RNA synthesis and processing. In some species, or in specialized cell types, RNA metabolism or DNA replication may be absent. [GOC:go_curators]	IEA	cellular_component
DAB2	ENSG00000153071	GO:2001046	positive regulation of integrin-mediated signaling pathway	Any process that activates or increases the frequency, rate or extent of integrin-mediated signaling pathway. [GOC:obol]	IEA	biological_process
DAB2	ENSG00000153071	GO:0035612	AP-2 adaptor complex binding	Interacting selectively and non-covalently with the AP-2 adaptor complex. The AP-2 adaptor complex is a heterotetrameric AP-type membrane coat adaptor complex that consists of alpha, beta2, mu2 and sigma2 subunits and links clathrin to the membrane surface of a vesicle. In at least humans, the AP-2 complex can be heterogeneric due to the existence of multiple subunit isoforms encoded by different…	IEA	molecular_function
DAB2	ENSG00000153071	GO:0032968	positive regulation of transcription elongation from RNA polymerase II promoter	Any process that activates or increases the frequency, rate or extent of transcription elongation, the extension of an RNA molecule after transcription initiation and promoter clearance by the addition of ribonucleotides, catalyzed by RNA polymerase II. [GOC:mah, GOC:txnOH]	IEA	biological_process
DAB2	ENSG00000153071	GO:0007492	endoderm development	The process whose specific outcome is the progression of the endoderm over time, from its formation to the mature structure. The endoderm is the innermost germ layer that develops into the gastrointestinal tract, the lungs and associated tissues. [GOC:dph, GOC:tb]	IEA	biological_process
DAB2	ENSG00000153071	GO:0006907	pinocytosis	An endocytosis process that results in the uptake of liquid material by cells from their external environment; literally 'cell drinking'. Liquid is enclosed in vesicles, called pinosomes, formed by invagination of the plasma membrane. [ISBN:0198506732]	IEA	biological_process
DAB2	ENSG00000153071	GO:0005546	phosphatidylinositol-4,5-bisphosphate binding	Interacting selectively and non-covalently with phosphatidylinositol-4,5-bisphosphate, a derivative of phosphatidylinositol in which the inositol ring is phosphorylated at the 4' and 5' positions. [GOC:bf, GOC:jl]	IEA	molecular_function
DAB2	ENSG00000153071	GO:0001921	positive regulation of receptor recycling	Any process that activates or increases the frequency, rate or extent of receptor recycling. [GOC:add]	IEA	biological_process
DAB2	ENSG00000153071	GO:0030099	myeloid cell differentiation	The process in which a relatively unspecialized myeloid precursor cell acquires the specialized features of any cell of the myeloid leukocyte, megakaryocyte, thrombocyte, or erythrocyte lineages. [GOC:add, ISBN:0781735149]	IEA	biological_process
DAB2	ENSG00000153071	GO:0030276	clathrin binding	Interacting selectively and non-covalently with a clathrin heavy or light chain, the main components of the coat of coated vesicles and coated pits, and which also occurs in synaptic vesicles. [GOC:jl, GOC:mah, ISBN:0198506732]	IEA	molecular_function
DAB2	ENSG00000153071	GO:1900026	positive regulation of substrate adhesion-dependent cell spreading	Any process that activates or increases the frequency, rate or extent of substrate adhesion-dependent cell spreading. [GOC:TermGenie, GOC:yaf]	IEA	biological_process
DAB2	ENSG00000153071	GO:0048268	clathrin coat assembly	The process that results in the assembly of clathrin triskelia into the ordered structure known as a clathrin cage. [GOC:jid, PMID:11460887, PMID:11977118, PMID:9531549]	IEA	biological_process
DAB2	ENSG00000153071	GO:0030132	clathrin coat of coated pit	The coat found on coated pits and the coated vesicles derived from coated pits; comprises clathrin and the AP-2 adaptor complex. [GOC:mah]	IEA	cellular_component
DAB2	ENSG00000153071	GO:0007257	activation of JUN kinase activity	The initiation of the activity of the inactive enzyme JUN kinase (JNK). [GOC:bf]	IEA	biological_process
[truncated: 24,534 more rows]
