# Supplementary material for: Archaic Adaptive Introgression in Modern Human Reproductive Genes
Source: Research Square preprint supplement (doi:10.21203/rs.3.rs-5544119/v1), 2025-03-19
Supplement: Supplementary file 9 [file 99a4a065a1ca286c66575e61.xlsx]

## Sheet: README
README: Gene enrichment results from Enrichr (Chen et al., 2013; Kuleshov et al., 2016; Xie et al., 2021) using genes regulated by archaic eQTLs as identified by FUMA GWAS (Watanabe et al., 2017; Watanabe et al., 2019) for just core haplotypes. We focused on the Reactome 2022, KEGG 2021 Human, Go Biological Processes, and GO Molecular Function tables. The table is sorted by the adjusted p-value i…

## Sheet: Supplemental Table 13
Database	Term	P-value	Adjusted P-value	Odds Ratio	Combined Score	Genes
GO Molecular Function	Protein-Cysteine S-palmitoyltransferase Activity (GO:0019706)	0.00116207	0.02485	45.204081632653065	305.46889148513117	ZDHHC11;ZDHHC11B
GO Molecular Function	Phosphatidylinositol-3,4-Bisphosphate Binding (GO:0043325)	0.00137411	0.02485	41.26915113871635	271.9616823625152	SESTD1;PLEK
GO Molecular Function	Phosphatidylinositol-4-Phosphate Binding (GO:0070273)	0.00137411	0.02485	41.26915113871635	271.9616823625152	SESTD1;PLEKHA3
GO Molecular Function	Palmitoyltransferase Activity (GO:0016409)	0.00160322	0.02485	37.96380952380952	244.32518446873542	ZDHHC11;ZDHHC11B
