# Supplementary material for: Archaic Adaptive Introgression in Modern Human Reproductive Genes
Source: Research Square preprint supplement (doi:10.21203/rs.3.rs-5544119/v1), 2025-03-19
Supplement: Supplementary file 11 [file aa6941c9957dbe6e9d698b96.xlsx]

## Sheet: README
README: FUMA GWAS SNP2GENE output (Watanabe et al., 2017; Watanabe et al., 2019) for all variants listed in Supplemental Table 4. We downloaded the eQTL table from the results. The variants are sorted in chromosomal order and are in hg19 format.

## Sheet: Supplemental Table 6
uniqID	db	tissue	gene	testedAllele	p	signed_stats	FDR	RiskIncAllele	alignedDirection	chr	pos	symbol	eqtlMapFilt
2:68385097:A:G	TIGER	Nom_Alonso_Pancreatic_islets	ENSG00000221823	G	0.0005582	-3.451	0.0450161	G	-	2	68385097	PPP3R1	1
2:68446936:C:T	TIGER	Nom_Alonso_Pancreatic_islets	ENSG00000221823	C	0.0004531	3.507	0.0365403	T	-	2	68446936	PPP3R1	1
2:68457573:C:T	TIGER	Nom_Alonso_Pancreatic_islets	ENSG00000221823	C	0.0002229	3.692	0.0179758	T	-	2	68457573	PPP3R1	1
2:68457854:A:G	TIGER	Nom_Alonso_Pancreatic_islets	ENSG00000221823	G	0.0002229	-3.692	0.0179758	G	-	2	68457854	PPP3R1	1
2:68463612:A:G	TIGER	Nom_Alonso_Pancreatic_islets	ENSG00000221823	G	0.0002211	3.694	0.0178306	A	-	2	68463612	PPP3R1	1
2:68467910:A:C	TIGER	Nom_Alonso_Pancreatic_islets	ENSG00000221823	C	0.0002631	-3.649	0.0212177	C	-	2	68467910	PPP3R1	1
2:68475595:A:C	TIGER	Nom_Alonso_Pancreatic_islets	ENSG00000221823	C	0.0002232	3.691	0.018	A	-	2	68475595	PPP3R1	1
2:68477248:C:T	TIGER	Nom_Alonso_Pancreatic_islets	ENSG00000221823	C	0.0002239	-3.69	0.0180565	C	-	2	68477248	PPP3R1	1
2:68478919:A:G	TIGER	Nom_Alonso_Pancreatic_islets	ENSG00000221823	G	0.0002235	-3.691	0.0180242	G	-	2	68478919	PPP3R1	1
2:179728006:C:T	TIGER	Nom_Alonso_Pancreatic_islets	ENSG00000223960	C	0.0002012	3.718	0.0162258	T	-	2	179728006	AC009948.5	1
2:179730852:A:G	TIGER	Nom_Alonso_Pancreatic_islets	ENSG00000223960	G	0.000201	-3.718	0.0162097	G	-	2	179730852	AC009948.5	1
2:179733011:A:T	TIGER	Nom_Alonso_Pancreatic_islets	ENSG00000223960	T	0.0002012	-3.718	0.0162258	T	-	2	179733011	AC009948.5	1
2:179733567:C:T	TIGER	Nom_Alonso_Pancreatic_islets	ENSG00000223960	C	0.0002011	-3.718	0.0162177	C	-	2	179733567	AC009948.5	1
2:179743944:C:T	TIGER	Nom_Alonso_Pancreatic_islets	ENSG00000223960	C	0.0001781	-3.748	0.0143629	C	-	2	179743944	AC009948.5	1
2:179745126:A:C	TIGER	Nom_Alonso_Pancreatic_islets	ENSG00000223960	C	0.0001766	-3.75	0.0142419	C	-	2	179745126	AC009948.5	1
2:179745150:C:T	TIGER	Nom_Alonso_Pancreatic_islets	ENSG00000223960	C	0.0001766	-3.75	0.0142419	C	-	2	179745150	AC009948.5	1
2:179750406:G:T	TIGER	Nom_Alonso_Pancreatic_islets	ENSG00000223960	G	0.0001701	-3.76	0.0137177	G	-	2	179750406	AC009948.5	1
2:238877170:C:G	TIGER	Nom_Alonso_Pancreatic_islets	ENSG00000144488	G	4.642e-05	-4.073	0.00374355	C	+	2	238877170	ESPNL	1
2:238877409:A:C	TIGER	Nom_Alonso_Pancreatic_islets	ENSG00000144488	C	4.621e-05	-4.074	0.00372661	A	+	2	238877409	ESPNL	1
2:238893362:C:T	TIGER	Nom_Alonso_Pancreatic_islets	ENSG00000144488	C	4.327e-05	-4.089	0.00348952	T	+	2	238893362	ESPNL	1
2:238895507:A:G	TIGER	Nom_Alonso_Pancreatic_islets	ENSG00000144488	G	4.327e-05	4.089	0.00348952	G	+	2	238895507	ESPNL	1
2:238907642:A:C	TIGER	Nom_Alonso_Pancreatic_islets	ENSG00000144488	C	4.326e-05	-4.089	0.00348871	A	+	2	238907642	ESPNL	1
2:238909269:A:G	TIGER	Nom_Alonso_Pancreatic_islets	ENSG00000144488	G	4.326e-05	-4.089	0.00348871	A	+	2	238909269	ESPNL	1
2:238910663:C:T	TIGER	Nom_Alonso_Pancreatic_islets	ENSG00000144488	C	4.326e-05	-4.089	0.00348871	T	+	2	238910663	ESPNL	1
2:238912120:A:C	TIGER	Nom_Alonso_Pancreatic_islets	ENSG00000144488	C	4.327e-05	-4.089	0.00348952	A	+	2	238912120	ESPNL	1
2:238912478:A:G	TIGER	Nom_Alonso_Pancreatic_islets	ENSG00000144488	G	4.327e-05	4.089	0.00348952	G	+	2	238912478	ESPNL	1
2:238922585:G:T	TIGER	Nom_Alonso_Pancreatic_islets	ENSG00000144488	G	4.298e-05	4.091	0.00346613	G	+	2	238922585	ESPNL	1
2:238930632:A:G	TIGER	Nom_Alonso_Pancreatic_islets	ENSG00000144488	G	3.395e-05	-4.145	0.0027379	A	+	2	238930632	ESPNL	1
2:238932389:A:G	TIGER	Nom_Alonso_Pancreatic_islets	ENSG00000144488	G	4.234e-05	4.094	0.00341452	G	+	2	238932389	ESPNL	1
2:238939370:C:T	TIGER	Nom_Alonso_Pancreatic_islets	ENSG00000144488	C	1.091e-06	4.874	8.7983870967742e-05	C	+	2	238939370	ESPNL	1
5:405576:A:G	TIGER	Nom_Alonso_Pancreatic_islets	ENSG00000225138	G	7.015e-06	-4.493	0.000565726	A	+	5	405576	CTD-2228K2.7	1
5:408529:C:T	TIGER	Nom_Alonso_Pancreatic_islets	ENSG00000225138	C	7.091e-06	-4.491	0.000571855	T	+	5	408529	CTD-2228K2.7	1
5:410943:A:G	TIGER	Nom_Alonso_Pancreatic_islets	ENSG00000225138	G	7.14e-06	4.489	0.000575806	G	+	5	410943	CTD-2228K2.7	1
5:411361:A:G	TIGER	Nom_Alonso_Pancreatic_islets	ENSG00000225138	G	7.14e-06	-4.489	0.000575806	A	+	5	411361	CTD-2228K2.7	1
5:412112:C:T	TIGER	Nom_Alonso_Pancreatic_islets	ENSG00000225138	C	7.003e-06	-4.494	0.000564758	T	+	5	412112	CTD-2228K2.7	1
5:413591:A:G	TIGER	Nom_Alonso_Pancreatic_islets	ENSG00000225138	G	1.593e-05	-4.315	0.00128468	A	+	5	413591	CTD-2228K2.7	1
5:416118:A:G	TIGER	Nom_Alonso_Pancreatic_islets	ENSG00000225138	G	4.766e-05	-4.067	0.00384355	A	+	5	416118	CTD-2228K2.7	1
5:416672:A:G	TIGER	Nom_Alonso_Pancreatic_islets	ENSG00000225138	G	4.989e-05	-4.056	0.00402339	A	+	5	416672	CTD-2228K2.7	1
5:418093:A:G	TIGER	Nom_Alonso_Pancreatic_islets	ENSG00000225138	G	2.847e-05	-4.185	0.00229597	G	-	5	418093	CTD-2228K2.7	1
5:418494:A:G	TIGER	Nom_Alonso_Pancreatic_islets	ENSG00000225138	G	4.873e-05	4.062	0.00392984	G	+	5	418494	CTD-2228K2.7	1
5:421403:A:G	TIGER	Nom_Alonso_Pancreatic_islets	ENSG00000225138	G	4.179e-05	-4.097	0.00337016	A	+	5	421403	CTD-2228K2.7	1
5:421426:A:C	TIGER	Nom_Alonso_Pancreatic_islets	ENSG00000188242	C	0.0006175	3.424	0.0497984	C	+	5	421426	CTD-2228K2.5	1
5:421426:A:C	TIGER	Nom_Alonso_Pancreatic_islets	ENSG00000225138	C	2.42e-05	-4.222	0.00195161	C	-	5	421426	CTD-2228K2.7	1
5:421455:G:T	TIGER	Nom_Alonso_Pancreatic_islets	ENSG00000225138	G	4.184e-05	-4.097	0.00337419	T	+	5	421455	CTD-2228K2.7	1
5:430217:C:T	TIGER	Nom_Alonso_Pancreatic_islets	ENSG00000225138	C	1.424e-05	-4.34	0.00114839	T	+	5	430217	CTD-2228K2.7	1
6:42022287:A:G	TIGER	Nom_Alonso_Pancreatic_islets	ENSG00000137413	G	4.015e-07	-5.068	3.23790322580645e-05	A	+	6	42022287	TAF8	1
6:42024285:A:G	TIGER	Nom_Alonso_Pancreatic_islets	ENSG00000137413	G	3.948e-07	-5.071	3.18387096774194e-05	A	+	6	42024285	TAF8	1
6:42025318:A:G	TIGER	Nom_Alonso_Pancreatic_islets	ENSG00000137413	G	3.912e-07	-5.073	3.15483870967742e-05	A	+	6	42025318	TAF8	1
6:42030878:C:G	TIGER	Nom_Alonso_Pancreatic_islets	ENSG00000137413	G	3.912e-07	5.073	3.15483870967742e-05	G	+	6	42030878	TAF8	1
6:42037348:C:T	TIGER	Nom_Alonso_Pancreatic_islets	ENSG00000137413	C	3.89e-07	5.074	3.13709677419355e-05	C	+	6	42037348	TAF8	1
10:70730197:C:G	TIGER	Nom_Alonso_Pancreatic_islets	ENSG00000165730	G	2.305e-09	5.975	1.85887096774194e-07	G	+	10	70730197	STOX1	1
10:70733935:C:T	TIGER	Nom_Alonso_Pancreatic_islets	ENSG00000165730	C	2.304e-09	-5.975	1.85806451612903e-07	T	+	10	70733935	STOX1	1
10:70736879:A:C	TIGER	Nom_Alonso_Pancreatic_islets	ENSG00000165730	C	2.293e-09	5.976	1.8491935483871e-07	C	+	10	70736879	STOX1	1
10:70737972:C:T	TIGER	Nom_Alonso_Pancreatic_islets	ENSG00000165730	C	2.305e-09	5.975	1.85887096774194e-07	C	+	10	70737972	STOX1	1
10:70740091:A:G	TIGER	Nom_Alonso_Pancreatic_islets	ENSG00000165730	G	2.305e-09	-5.975	1.85887096774194e-07	A	+	10	70740091	STOX1	1
10:70884514:A:G	TIGER	Nom_Alonso_Pancreatic_islets	ENSG00000122958	G	0.0001836	3.741	0.0148065	G	+	10	70884514	VPS26A	1
10:70890541:C:T	TIGER	Nom_Alonso_Pancreatic_islets	ENSG00000122958	C	0.0001952	3.725	0.0157419	C	+	10	70890541	VPS26A	1
10:70902716:A:G	TIGER	Nom_Alonso_Pancreatic_islets	ENSG00000122958	G	0.0001267	-3.833	0.0102177	A	+	10	70902716	VPS26A	1
10:70903844:C:G	TIGER	Nom_Alonso_Pancreatic_islets	ENSG00000122958	G	0.0002851	3.628	0.0229919	G	+	10	70903844	VPS26A	1
10:70944798:C:T	TIGER	Nom_Alonso_Pancreatic_islets	ENSG00000122958	C	5.118e-05	4.05	0.00412742	C	+	10	70944798	VPS26A	1
11:457879:C:T	TIGER	Nom_Alonso_Pancreatic_islets	ENSG00000174775	C	5.645e-07	5.003	4.55241935483871e-05	C	+	11	457879	HRAS	1
11:457879:C:T	TIGER	Nom_Alonso_Pancreatic_islets	ENSG00000023191	C	2.362e-07	5.168	1.90483870967742e-05	C	+	11	457879	RNH1	1
11:458595:A:G	TIGER	Nom_Alonso_Pancreatic_islets	ENSG00000023191	G	3.402e-06	4.645	0.000274355	G	+	11	458595	RNH1	1
11:458595:A:G	TIGER	Nom_Alonso_Pancreatic_islets	ENSG00000174775	G	1.7e-06	4.786	0.000137097	G	+	11	458595	HRAS	1
11:460765:A:G	TIGER	Nom_Alonso_Pancreatic_islets	ENSG00000174775	G	4.93e-07	-5.029	3.9758064516129e-05	A	+	11	460765	HRAS	1
11:460765:A:G	TIGER	Nom_Alonso_Pancreatic_islets	ENSG00000023191	G	3.199e-07	-5.111	2.57983870967742e-05	A	+	11	460765	RNH1	1
11:462684:C:T	TIGER	Nom_Alonso_Pancreatic_islets	ENSG00000174775	C	1.654e-06	4.792	0.000133387	C	+	11	462684	HRAS	1
11:462684:C:T	TIGER	Nom_Alonso_Pancreatic_islets	ENSG00000023191	C	3.461e-06	4.641	0.000279113	C	+	11	462684	RNH1	1
11:462855:A:G	TIGER	Nom_Alonso_Pancreatic_islets	ENSG00000023191	G	3.204e-07	5.111	2.58387096774194e-05	G	+	11	462855	RNH1	1
11:462855:A:G	TIGER	Nom_Alonso_Pancreatic_islets	ENSG00000174775	G	4.808e-07	5.034	3.87741935483871e-05	G	+	11	462855	HRAS	1
11:467368:A:G	TIGER	Nom_Alonso_Pancreatic_islets	ENSG00000174775	G	5.247e-07	-5.017	4.23145161290323e-05	A	+	11	467368	HRAS	1
11:467368:A:G	TIGER	Nom_Alonso_Pancreatic_islets	ENSG00000023191	G	3.3e-07	-5.105	2.66129032258065e-05	A	+	11	467368	RNH1	1
11:473300:G:T	TIGER	Nom_Alonso_Pancreatic_islets	ENSG00000023191	G	3.342e-07	5.103	2.69516129032258e-05	G	+	11	473300	RNH1	1
11:473300:G:T	TIGER	Nom_Alonso_Pancreatic_islets	ENSG00000174775	G	5.437e-07	5.01	4.38467741935484e-05	G	+	11	473300	HRAS	1
11:477623:C:T	TIGER	Nom_Alonso_Pancreatic_islets	ENSG00000174775	C	5.451e-07	5.01	4.39596774193548e-05	C	+	11	477623	HRAS	1
11:477623:C:T	TIGER	Nom_Alonso_Pancreatic_islets	ENSG00000023191	C	3.349e-07	5.103	2.7008064516129e-05	C	+	11	477623	RNH1	1
11:484469:C:T	TIGER	Nom_Alonso_Pancreatic_islets	ENSG00000174775	C	5.451e-07	5.01	4.39596774193548e-05	C	+	11	484469	HRAS	1
11:484469:C:T	TIGER	Nom_Alonso_Pancreatic_islets	ENSG00000023191	C	3.349e-07	5.103	2.7008064516129e-05	C	+	11	484469	RNH1	1
11:486414:A:G	TIGER	Nom_Alonso_Pancreatic_islets	ENSG00000023191	G	3.349e-07	5.103	2.7008064516129e-05	G	+	11	486414	RNH1	1
11:486414:A:G	TIGER	Nom_Alonso_Pancreatic_islets	ENSG00000174775	G	5.451e-07	5.01	4.39596774193548e-05	G	+	11	486414	HRAS	1
11:487101:C:T	TIGER	Nom_Alonso_Pancreatic_islets	ENSG00000174775	C	5.451e-07	5.01	4.39596774193548e-05	C	+	11	487101	HRAS	1
11:487101:C:T	TIGER	Nom_Alonso_Pancreatic_islets	ENSG00000023191	C	3.349e-07	5.103	2.7008064516129e-05	C	+	11	487101	RNH1	1
11:487136:A:G	TIGER	Nom_Alonso_Pancreatic_islets	ENSG00000023191	G	3.633e-06	4.631	0.000292984	G	+	11	487136	RNH1	1
11:487136:A:G	TIGER	Nom_Alonso_Pancreatic_islets	ENSG00000174775	G	1.896e-06	4.764	0.000152903	G	+	11	487136	HRAS	1
11:487201:C:T	TIGER	Nom_Alonso_Pancreatic_islets	ENSG00000023191	C	3.349e-07	-5.103	2.7008064516129e-05	T	+	11	487201	RNH1	1
11:487201:C:T	TIGER	Nom_Alonso_Pancreatic_islets	ENSG00000174775	C	5.451e-07	-5.01	4.39596774193548e-05	T	+	11	487201	HRAS	1
11:490035:C:T	TIGER	Nom_Alonso_Pancreatic_islets	ENSG00000023191	C	6.445e-07	4.977	5.19758064516129e-05	C	+	11	490035	RNH1	1
11:490035:C:T	TIGER	Nom_Alonso_Pancreatic_islets	ENSG00000174775	C	3.118e-06	4.663	0.000251452	C	+	11	490035	HRAS	1
11:491334:A:C	TIGER	Nom_Alonso_Pancreatic_islets	ENSG00000023191	C	9.322e-08	-5.339	7.51774193548387e-06	A	+	11	491334	RNH1	1
11:491334:A:C	TIGER	Nom_Alonso_Pancreatic_islets	ENSG00000174775	C	5.01e-07	-5.026	4.04032258064516e-05	A	+	11	491334	HRAS	1
11:494662:A:G	TIGER	Nom_Alonso_Pancreatic_islets	ENSG00000174775	G	8.232e-07	4.93	6.63870967741936e-05	G	+	11	494662	HRAS	1
11:494662:A:G	TIGER	Nom_Alonso_Pancreatic_islets	ENSG00000023191	G	1.049e-07	5.318	8.45967741935484e-06	G	+	11	494662	RNH1	1
11:495699:A:C	TIGER	Nom_Alonso_Pancreatic_islets	ENSG00000023191	C	1.058e-07	-5.317	8.53225806451613e-06	A	+	11	495699	RNH1	1
11:495699:A:C	TIGER	Nom_Alonso_Pancreatic_islets	ENSG00000174775	C	8.19e-07	-4.931	6.60483870967742e-05	A	+	11	495699	HRAS	1
11:495892:C:G	TIGER	Nom_Alonso_Pancreatic_islets	ENSG00000023191	G	1.059e-07	-5.316	8.54032258064516e-06	C	+	11	495892	RNH1	1
11:495892:C:G	TIGER	Nom_Alonso_Pancreatic_islets	ENSG00000174775	G	8.182e-07	-4.931	6.59838709677419e-05	C	+	11	495892	HRAS	1
11:496193:G:T	TIGER	Nom_Alonso_Pancreatic_islets	ENSG00000023191	G	1.042e-07	-5.319	8.40322580645162e-06	T	+	11	496193	RNH1	1
11:496193:G:T	TIGER	Nom_Alonso_Pancreatic_islets	ENSG00000174775	G	8.004e-07	-4.935	6.45483870967742e-05	T	+	11	496193	HRAS	1
11:501468:A:G	TIGER	Nom_Alonso_Pancreatic_islets	ENSG00000023191	G	1.125e-07	5.305	9.07258064516129e-06	G	+	11	501468	RNH1	1
11:501468:A:G	TIGER	Nom_Alonso_Pancreatic_islets	ENSG00000174775	G	7.969e-07	4.936	6.42661290322581e-05	G	+	11	501468	HRAS	1
11:502371:A:G	TIGER	Nom_Alonso_Pancreatic_islets	ENSG00000174775	G	8.299e-07	4.928	6.69274193548387e-05	G	+	11	502371	HRAS	1
11:502371:A:G	TIGER	Nom_Alonso_Pancreatic_islets	ENSG00000023191	G	1.06e-07	5.316	8.54838709677419e-06	G	+	11	502371	RNH1	1
11:503385:C:G	TIGER	Nom_Alonso_Pancreatic_islets	ENSG00000023191	G	1.142e-07	-5.303	9.20967741935484e-06	C	+	11	503385	RNH1	1
11:503385:C:G	TIGER	Nom_Alonso_Pancreatic_islets	ENSG00000174775	G	7.916e-07	-4.937	6.38387096774194e-05	C	+	11	503385	HRAS	1
11:503710:C:T	TIGER	Nom_Alonso_Pancreatic_islets	ENSG00000174775	C	7.91e-07	4.938	6.37903225806452e-05	C	+	11	503710	HRAS	1
11:503710:C:T	TIGER	Nom_Alonso_Pancreatic_islets	ENSG00000023191	C	1.144e-07	5.302	9.2258064516129e-06	C	+	11	503710	RNH1	1
11:504411:C:G	TIGER	Nom_Alonso_Pancreatic_islets	ENSG00000023191	G	1.149e-07	-5.301	9.26612903225807e-06	C	+	11	504411	RNH1	1
11:504411:C:G	TIGER	Nom_Alonso_Pancreatic_islets	ENSG00000174775	G	7.893e-07	-4.938	6.36532258064516e-05	C	+	11	504411	HRAS	1
11:506229:C:T	TIGER	Nom_Alonso_Pancreatic_islets	ENSG00000023191	C	1.163e-07	5.299	9.37903225806452e-06	C	+	11	506229	RNH1	1
11:506229:C:T	TIGER	Nom_Alonso_Pancreatic_islets	ENSG00000174775	C	7.859e-07	4.939	6.33790322580645e-05	C	+	11	506229	HRAS	1
11:506442:G:T	TIGER	Nom_Alonso_Pancreatic_islets	ENSG00000174775	G	7.86e-07	4.939	6.33870967741936e-05	G	+	11	506442	HRAS	1
11:506442:G:T	TIGER	Nom_Alonso_Pancreatic_islets	ENSG00000023191	G	1.162e-07	5.299	9.37096774193548e-06	G	+	11	506442	RNH1	1
11:506596:C:T	TIGER	Nom_Alonso_Pancreatic_islets	ENSG00000023191	C	1.166e-07	5.299	9.40322580645161e-06	C	+	11	506596	RNH1	1
11:506596:C:T	TIGER	Nom_Alonso_Pancreatic_islets	ENSG00000174775	C	7.847e-07	4.939	6.32822580645161e-05	C	+	11	506596	HRAS	1
14:74480794:C:G	TIGER	Nom_Alonso_Pancreatic_islets	ENSG00000258653	G	0.0001518	3.788	0.0122419	C	-	14	74480794	RP5-1021I20.4	1
14:74480794:C:G	TIGER	Nom_Alonso_Pancreatic_islets	ENSG00000259065	G	3.138e-37	-12.749	2.53064516129032e-35	C	+	14	74480794	RP5-1021I20.1	1
14:74485133:C:T	TIGER	Nom_Alonso_Pancreatic_islets	ENSG00000259065	C	3.173e-37	-12.749	2.55887096774194e-35	T	+	14	74485133	RP5-1021I20.1	1
14:74485133:C:T	TIGER	Nom_Alonso_Pancreatic_islets	ENSG00000258653	C	0.0001521	3.788	0.0122661	T	-	14	74485133	RP5-1021I20.4	1
2:68385097:A:G	EyeGEx	EyeGEx	ENSG00000273275	A	1.26629e-06	0.358728	0.000840371	G	-	2	68385097	RP11-474G23.2	1
2:68393144:A:T	EyeGEx	EyeGEx	ENSG00000273275	T	2.04545e-07	0.392359	0.000135746	A	-	2	68393144	RP11-474G23.2	1
2:68394184:C:T	EyeGEx	EyeGEx	ENSG00000273275	C	1.90745e-07	0.393436	0.000126588	T	-	2	68394184	RP11-474G23.2	1
2:68395631:A:G	EyeGEx	EyeGEx	ENSG00000273275	G	1.7267e-07	0.394924	0.000114592	A	-	2	68395631	RP11-474G23.2	1
2:68398919:C:G	EyeGEx	EyeGEx	ENSG00000273275	G	1.65914e-07	0.393796	0.000110109	C	-	2	68398919	RP11-474G23.2	1
2:68399190:C:T	EyeGEx	EyeGEx	ENSG00000273275	C	1.62797e-07	0.394059	0.00010804	T	-	2	68399190	RP11-474G23.2	1
2:68402012:G:T	EyeGEx	EyeGEx	ENSG00000273275	G	1.16639e-07	0.39958	7.74072800815936e-05	T	-	2	68402012	RP11-474G23.2	1
2:68402830:C:G	EyeGEx	EyeGEx	ENSG00000273275	G	1.39867e-07	0.396134	9.28225039924232e-05	C	-	2	68402830	RP11-474G23.2	1
2:68410372:A:C	EyeGEx	EyeGEx	ENSG00000273275	C	1.30161e-07	0.397103	8.63811330918501e-05	A	-	2	68410372	RP11-474G23.2	1
2:68410660:G:T	EyeGEx	EyeGEx	ENSG00000273275	T	1.31244e-07	0.39697	8.70998642566266e-05	G	-	2	68410660	RP11-474G23.2	1
2:68411414:A:G	EyeGEx	EyeGEx	ENSG00000273275	G	1.30433e-07	0.39705	8.65616454434837e-05	A	-	2	68411414	RP11-474G23.2	1
2:68418868:A:T	EyeGEx	EyeGEx	ENSG00000273275	A	1.17671e-07	0.398401	7.80921651804388e-05	T	-	2	68418868	RP11-474G23.2	1
2:68419487:A:G	EyeGEx	EyeGEx	ENSG00000273275	G	1.16986e-07	0.398473	7.76375660595968e-05	A	-	2	68419487	RP11-474G23.2	1
2:68420070:G:T	EyeGEx	EyeGEx	ENSG00000273275	G	1.16251e-07	0.398554	7.7149784521175e-05	T	-	2	68420070	RP11-474G23.2	1
2:68421049:A:G	EyeGEx	EyeGEx	ENSG00000273275	G	1.15207e-07	0.398668	7.64569356421107e-05	A	-	2	68421049	RP11-474G23.2	1
2:68422771:A:G	EyeGEx	EyeGEx	ENSG00000273275	G	1.13226e-07	0.398884	7.51422482576026e-05	A	-	2	68422771	RP11-474G23.2	1
2:68423530:A:G	EyeGEx	EyeGEx	ENSG00000273275	G	1.12331e-07	0.398982	7.45482829829258e-05	A	-	2	68423530	RP11-474G23.2	1
2:68430925:C:T	EyeGEx	EyeGEx	ENSG00000273275	C	1.0527e-07	0.399759	6.98622619723193e-05	T	-	2	68430925	RP11-474G23.2	1
2:68431259:A:G	EyeGEx	EyeGEx	ENSG00000273275	G	1.04922e-07	0.399797	6.96313123459646e-05	A	-	2	68431259	RP11-474G23.2	1
2:68433831:A:G	EyeGEx	EyeGEx	ENSG00000273275	G	1.03511e-07	0.399926	6.86949045218652e-05	A	-	2	68433831	RP11-474G23.2	1
2:68435431:C:G	EyeGEx	EyeGEx	ENSG00000273275	C	1.01701e-07	0.400405	6.74937010054797e-05	G	-	2	68435431	RP11-474G23.2	1
2:68438614:C:T	EyeGEx	EyeGEx	ENSG00000273275	C	1.00721e-07	0.400247	6.68433256209174e-05	T	-	2	68438614	RP11-474G23.2	1
2:68439960:C:T	EyeGEx	EyeGEx	ENSG00000273275	C	6.27712e-08	0.405939	4.16580034075886e-05	T	-	2	68439960	RP11-474G23.2	1
2:68443651:A:G	EyeGEx	EyeGEx	ENSG00000273275	A	6.12057e-08	0.40586	4.06190619131679e-05	G	-	2	68443651	RP11-474G23.2	1
2:68443835:A:T	EyeGEx	EyeGEx	ENSG00000273275	A	6.11719e-08	0.405863	4.0596630598884e-05	T	-	2	68443835	RP11-474G23.2	1
2:68446936:C:T	EyeGEx	EyeGEx	ENSG00000273275	C	9.22417e-08	0.400957	6.12160521532449e-05	T	-	2	68446936	RP11-474G23.2	1
2:68457573:C:T	EyeGEx	EyeGEx	ENSG00000273275	C	9.51562e-08	0.400181	6.31502552739661e-05	T	-	2	68457573	RP11-474G23.2	1
2:68457854:A:G	EyeGEx	EyeGEx	ENSG00000273275	A	9.50829e-08	0.400185	6.31016098497943e-05	G	-	2	68457854	RP11-474G23.2	1
2:68463612:A:G	EyeGEx	EyeGEx	ENSG00000273275	G	9.46938e-08	0.400123	6.2843384276189e-05	A	-	2	68463612	RP11-474G23.2	1
2:68467910:A:C	EyeGEx	EyeGEx	ENSG00000273275	A	9.4511e-08	0.400072	6.27220693575176e-05	C	-	2	68467910	RP11-474G23.2	1
2:68475595:A:C	EyeGEx	EyeGEx	ENSG00000273275	C	9.44264e-08	0.400026	6.26659247069727e-05	A	-	2	68475595	RP11-474G23.2	1
2:68477248:C:T	EyeGEx	EyeGEx	ENSG00000273275	T	7.54495e-08	0.40596	5.00719363036051e-05	C	-	2	68477248	RP11-474G23.2	1
2:68478919:A:G	EyeGEx	EyeGEx	ENSG00000273275	A	3.04075e-07	0.384099	0.000201799	G	-	2	68478919	RP11-474G23.2	1
2:173297783:A:G	EyeGEx	EyeGEx	ENSG00000091409	A	1.14021e-31	1.49319	7.13520263549295e-29	G	-	2	173297783	ITGA6	1
2:173300939:A:G	EyeGEx	EyeGEx	ENSG00000091409	A	1.29829e-34	1.47577	8.12443517390143e-32	G	-	2	173300939	ITGA6	1
2:173302006:A:G	EyeGEx	EyeGEx	ENSG00000091409	G	1.20276e-34	1.4748	7.52662783335132e-32	A	-	2	173302006	ITGA6	1
2:173311553:A:G	EyeGEx	EyeGEx	ENSG00000091409	G	1.04372e-34	1.47052	6.53138780989178e-32	A	-	2	173311553	ITGA6	1
2:173313453:C:T	EyeGEx	EyeGEx	ENSG00000091409	T	1.40147e-34	1.47435	8.7701146609522e-32	C	-	2	173313453	ITGA6	1
2:173314713:A:T	EyeGEx	EyeGEx	ENSG00000091409	T	1.79113e-34	1.47608	1.12085278119912e-31	A	-	2	173314713	ITGA6	1
2:173319112:A:T	EyeGEx	EyeGEx	ENSG00000091409	T	1.27375e-33	1.47392	7.97086883728361e-31	A	-	2	173319112	ITGA6	1
2:173319930:C:T	EyeGEx	EyeGEx	ENSG00000091409	T	2.45232e-33	1.47033	1.5346120562942e-30	C	-	2	173319930	ITGA6	1
2:173321413:A:T	EyeGEx	EyeGEx	ENSG00000091409	T	6.36787e-33	1.46411	3.98488373251213e-30	A	-	2	173321413	ITGA6	1
2:173327823:C:T	EyeGEx	EyeGEx	ENSG00000091409	T	4.2158e-32	1.44758	2.63816202898687e-29	C	-	2	173327823	ITGA6	1
2:173342416:C:T	EyeGEx	EyeGEx	ENSG00000091409	T	6.05246e-32	1.42676	3.78750655960005e-29	C	-	2	173342416	ITGA6	1
2:173344128:A:G	EyeGEx	EyeGEx	ENSG00000091409	A	6.05246e-32	1.42676	3.78750655960005e-29	G	-	2	173344128	ITGA6	1
2:173352157:A:T	EyeGEx	EyeGEx	ENSG00000091409	T	6.05246e-32	1.42676	3.78750655960005e-29	A	-	2	173352157	ITGA6	1
2:173368358:G:T	EyeGEx	EyeGEx	ENSG00000091409	G	6.05246e-32	1.42676	3.78750655960005e-29	T	-	2	173368358	ITGA6	1
3:153992586:A:G	EyeGEx	EyeGEx	ENSG00000174953	A	3.52556e-24	0.956605	1.45968207739366e-21	G	-	3	153992586	DHX36	1
3:154004009:C:T	EyeGEx	EyeGEx	ENSG00000174953	T	3.52118e-24	0.956649	1.45786863286315e-21	C	-	3	154004009	DHX36	1
3:154009933:C:T	EyeGEx	EyeGEx	ENSG00000174953	T	3.52556e-24	0.956605	1.45968207739366e-21	C	-	3	154009933	DHX36	1
3:154036196:A:G	EyeGEx	EyeGEx	ENSG00000174953	A	3.52669e-24	0.956588	1.4601499295214e-21	G	-	3	154036196	DHX36	1
3:154036657:C:T	EyeGEx	EyeGEx	ENSG00000174953	C	1.59782e-23	0.946749	6.61542908616261e-21	T	-	3	154036657	DHX36	1
3:154040273:A:G	EyeGEx	EyeGEx	ENSG00000174953	G	3.52784e-24	0.956572	1.46062606221776e-21	A	-	3	154040273	DHX36	1
5:405576:A:G	EyeGEx	EyeGEx	ENSG00000171368	A	8.45029e-06	0.341491	0.00649183	A	+	5	405576	TPPP	1
5:405576:A:G	EyeGEx	EyeGEx	ENSG00000180104	A	7.49279e-09	-0.439502	4.98957469476005e-06	A	-	5	405576	EXOC3	1
5:405576:A:G	EyeGEx	EyeGEx	ENSG00000225138	A	2.89399e-10	0.477563	1.86913764047354e-07	A	+	5	405576	CTD-2228K2.7	1
5:408529:C:T	EyeGEx	EyeGEx	ENSG00000171368	T	8.08461e-06	0.340176	0.00621091	T	+	5	408529	TPPP	1
5:408529:C:T	EyeGEx	EyeGEx	ENSG00000180104	T	5.97408e-09	-0.439656	3.97824020057577e-06	T	-	5	408529	EXOC3	1
5:408529:C:T	EyeGEx	EyeGEx	ENSG00000225138	T	1.59076e-10	0.481327	1.02742213793402e-07	T	+	5	408529	CTD-2228K2.7	1
5:410943:A:G	EyeGEx	EyeGEx	ENSG00000171368	G	8.45634e-06	0.339014	0.00649648	G	+	5	410943	TPPP	1
5:410943:A:G	EyeGEx	EyeGEx	ENSG00000180104	G	6.06137e-09	-0.438903	4.03636807752222e-06	G	-	5	410943	EXOC3	1
5:410943:A:G	EyeGEx	EyeGEx	ENSG00000225138	G	1.53033e-10	0.481117	9.88392290694116e-08	G	+	5	410943	CTD-2228K2.7	1
5:411361:A:G	EyeGEx	EyeGEx	ENSG00000171368	A	3.21223e-05	0.314109	0.0246776	A	+	5	411361	TPPP	1
5:411361:A:G	EyeGEx	EyeGEx	ENSG00000180104	A	3.64465e-08	-0.412733	2.4270336431766e-05	A	-	5	411361	EXOC3	1
5:411361:A:G	EyeGEx	EyeGEx	ENSG00000225138	A	5.35841e-10	0.462938	3.4608294514113e-07	A	+	5	411361	CTD-2228K2.7	1
5:412112:C:T	EyeGEx	EyeGEx	ENSG00000171368	T	7.3897e-06	0.341867	0.00567705	T	+	5	412112	TPPP	1
5:412112:C:T	EyeGEx	EyeGEx	ENSG00000180104	T	3.56818e-09	-0.446193	2.37611098594101e-06	T	-	5	412112	EXOC3	1
5:412112:C:T	EyeGEx	EyeGEx	ENSG00000225138	T	9.82672e-11	0.486929	6.34677114792867e-08	T	+	5	412112	CTD-2228K2.7	1
5:413591:A:G	EyeGEx	EyeGEx	ENSG00000180104	A	5.5448e-09	-0.442338	3.69237543925635e-06	A	-	5	413591	EXOC3	1
5:413591:A:G	EyeGEx	EyeGEx	ENSG00000225138	A	1.33457e-10	0.485193	8.61957028478594e-08	A	+	5	413591	CTD-2228K2.7	1
5:416118:A:G	EyeGEx	EyeGEx	ENSG00000171368	A	3.79597e-07	0.389104	0.000291621	A	+	5	416118	TPPP	1
5:416118:A:G	EyeGEx	EyeGEx	ENSG00000180104	A	1.56384e-14	-0.576762	1.04138731909657e-11	A	-	5	416118	EXOC3	1
5:416118:A:G	EyeGEx	EyeGEx	ENSG00000225138	A	2.28814e-10	0.481508	1.4778380715459e-07	A	+	5	416118	CTD-2228K2.7	1
5:416672:A:G	EyeGEx	EyeGEx	ENSG00000171368	A	3.66573e-07	0.389407	0.000281615	A	+	5	416672	TPPP	1
5:416672:A:G	EyeGEx	EyeGEx	ENSG00000180104	A	1.11669e-14	-0.579477	7.43622624668729e-12	A	-	5	416672	EXOC3	1
5:416672:A:G	EyeGEx	EyeGEx	ENSG00000225138	A	1.98496e-10	0.482851	1.28202359055641e-07	A	+	5	416672	CTD-2228K2.7	1
5:418093:A:G	EyeGEx	EyeGEx	ENSG00000180104	G	3.25447e-09	-0.609167	2.16720622850177e-06	G	-	5	418093	EXOC3	1
5:418093:A:G	EyeGEx	EyeGEx	ENSG00000225138	G	1.10113e-11	-0.694452	7.11185432587751e-09	G	-	5	418093	CTD-2228K2.7	1
5:418494:A:G	EyeGEx	EyeGEx	ENSG00000171368	G	3.35783e-07	0.38967	0.000257961	G	+	5	418494	TPPP	1
5:418494:A:G	EyeGEx	EyeGEx	ENSG00000180104	G	3.86924e-15	-0.587316	2.57659189593641e-12	G	-	5	418494	EXOC3	1
5:418494:A:G	EyeGEx	EyeGEx	ENSG00000225138	G	1.27895e-10	0.486482	8.26033809820915e-08	G	+	5	418494	CTD-2228K2.7	1
5:421193:C:G	EyeGEx	EyeGEx	ENSG00000180104	C	3.29686e-13	-0.539151	2.19543444139855e-10	C	-	5	421193	EXOC3	1
5:421193:C:G	EyeGEx	EyeGEx	ENSG00000221990	C	6.19976e-05	0.30332	0.0391823	C	+	5	421193	C5orf55	1
5:421193:C:G	EyeGEx	EyeGEx	ENSG00000225138	C	8.49191e-10	0.45855	5.48465911095533e-07	C	+	5	421193	CTD-2228K2.7	1
5:421403:A:G	EyeGEx	EyeGEx	ENSG00000171368	A	1.16047e-07	0.410949	8.91517213695397e-05	A	+	5	421403	TPPP	1
5:421403:A:G	EyeGEx	EyeGEx	ENSG00000180104	A	3.19932e-15	-0.598734	2.13048091731381e-12	A	-	5	421403	EXOC3	1
5:421403:A:G	EyeGEx	EyeGEx	ENSG00000225138	A	1.98466e-12	0.538482	1.28182982993798e-09	A	+	5	421403	CTD-2228K2.7	1
5:421426:A:C	EyeGEx	EyeGEx	ENSG00000180104	C	2.68541e-09	-0.638942	1.78825961771991e-06	C	-	5	421426	EXOC3	1
5:421426:A:C	EyeGEx	EyeGEx	ENSG00000225138	C	2.55147e-11	-0.71237	1.64791468372006e-08	C	-	5	421426	CTD-2228K2.7	1
5:421455:G:T	EyeGEx	EyeGEx	ENSG00000171368	T	1.73194e-07	0.396511	0.000133054	T	+	5	421455	TPPP	1
5:421455:G:T	EyeGEx	EyeGEx	ENSG00000180104	T	7.64306e-16	-0.597678	5.08964201139132e-13	T	-	5	421455	EXOC3	1
5:421455:G:T	EyeGEx	EyeGEx	ENSG00000225138	T	7.76403e-11	0.489054	5.01454418113599e-08	T	+	5	421455	CTD-2228K2.7	1
5:422178:A:G	EyeGEx	EyeGEx	ENSG00000171368	A	1.08685e-07	0.380623	8.34959528212571e-05	A	+	5	422178	TPPP	1
5:422178:A:G	EyeGEx	EyeGEx	ENSG00000180104	A	2.62106e-22	-0.668851	1.74540787202735e-19	A	-	5	422178	EXOC3	1
5:422178:A:G	EyeGEx	EyeGEx	ENSG00000221990	A	3.29787e-05	0.29953	0.0208424	A	+	5	422178	C5orf55	1
5:422178:A:G	EyeGEx	EyeGEx	ENSG00000225138	A	8.10614e-06	0.321402	0.0052355	A	+	5	422178	CTD-2228K2.7	1
5:423169:C:T	EyeGEx	EyeGEx	ENSG00000171368	T	1.0983e-07	0.379936	8.43755853922682e-05	T	+	5	423169	TPPP	1
5:423169:C:T	EyeGEx	EyeGEx	ENSG00000180104	T	2.02274e-22	-0.669484	1.34697653585366e-19	T	-	5	423169	EXOC3	1
5:423169:C:T	EyeGEx	EyeGEx	ENSG00000221990	T	3.17381e-05	0.299712	0.0200584	T	+	5	423169	C5orf55	1
5:423169:C:T	EyeGEx	EyeGEx	ENSG00000225138	T	7.80399e-06	0.321504	0.00504035	T	+	5	423169	CTD-2228K2.7	1
5:423595:C:T	EyeGEx	EyeGEx	ENSG00000171368	T	1.23512e-07	0.378136	9.48866184373106e-05	T	+	5	423595	TPPP	1
5:423595:C:T	EyeGEx	EyeGEx	ENSG00000180104	T	1.61773e-22	-0.670301	1.07727357512411e-19	T	-	5	423595	EXOC3	1
5:423595:C:T	EyeGEx	EyeGEx	ENSG00000221990	T	2.65868e-05	0.302295	0.0168028	T	+	5	423595	C5orf55	1
5:423595:C:T	EyeGEx	EyeGEx	ENSG00000225138	T	5.90588e-06	0.325383	0.00381442	T	+	5	423595	CTD-2228K2.7	1
5:423671:C:T	EyeGEx	EyeGEx	ENSG00000171368	T	1.10413e-07	0.379834	8.48234681773332e-05	T	+	5	423671	TPPP	1
5:423671:C:T	EyeGEx	EyeGEx	ENSG00000180104	T	1.95791e-22	-0.669622	1.30380515009998e-19	T	-	5	423671	EXOC3	1
5:423671:C:T	EyeGEx	EyeGEx	ENSG00000221990	T	3.1651e-05	0.299727	0.0200033	T	+	5	423671	C5orf55	1
5:423671:C:T	EyeGEx	EyeGEx	ENSG00000225138	T	7.81315e-06	0.321456	0.00504627	T	+	5	423671	CTD-2228K2.7	1
5:423906:A:G	EyeGEx	EyeGEx	ENSG00000171368	A	1.10914e-07	0.379756	8.52083554420289e-05	A	+	5	423906	TPPP	1
5:423906:A:G	EyeGEx	EyeGEx	ENSG00000180104	A	1.92343e-22	-0.669697	1.28084433904358e-19	A	-	5	423906	EXOC3	1
5:423906:A:G	EyeGEx	EyeGEx	ENSG00000221990	A	3.15943e-05	0.29974	0.0199675	A	+	5	423906	C5orf55	1
5:423906:A:G	EyeGEx	EyeGEx	ENSG00000225138	A	7.8126e-06	0.32144	0.00504591	A	+	5	423906	CTD-2228K2.7	1
5:428236:A:C	EyeGEx	EyeGEx	ENSG00000171368	A	1.22908e-07	0.377349	9.44226026531266e-05	A	+	5	428236	TPPP	1
5:428236:A:C	EyeGEx	EyeGEx	ENSG00000180104	A	1.19702e-22	-0.670646	7.97115720729085e-20	A	-	5	428236	EXOC3	1
5:428236:A:C	EyeGEx	EyeGEx	ENSG00000221990	A	2.99881e-05	0.299696	0.0189524	A	+	5	428236	C5orf55	1
5:428236:A:C	EyeGEx	EyeGEx	ENSG00000225138	A	1.01566e-05	0.316546	0.00655983	A	+	5	428236	CTD-2228K2.7	1
5:429124:C:G	EyeGEx	EyeGEx	ENSG00000171368	G	1.24877e-07	0.37709	9.59352633800443e-05	G	+	5	429124	TPPP	1
5:429124:C:G	EyeGEx	EyeGEx	ENSG00000180104	G	1.22824e-22	-0.670384	8.17905643037118e-20	G	-	5	429124	EXOC3	1
5:429124:C:G	EyeGEx	EyeGEx	ENSG00000221990	G	3.18872e-05	0.298665	0.0201526	G	+	5	429124	C5orf55	1
5:429124:C:G	EyeGEx	EyeGEx	ENSG00000225138	G	1.01237e-05	0.316546	0.00653858	G	+	5	429124	CTD-2228K2.7	1
5:429818:C:G	EyeGEx	EyeGEx	ENSG00000171368	G	1.26517e-07	0.376868	9.71951737874314e-05	G	+	5	429818	TPPP	1
5:429818:C:G	EyeGEx	EyeGEx	ENSG00000180104	G	1.2571e-22	-0.670139	8.3712400171136e-20	G	-	5	429818	EXOC3	1
5:429818:C:G	EyeGEx	EyeGEx	ENSG00000221990	G	3.34218e-05	0.297864	0.0211225	G	+	5	429818	C5orf55	1
5:429818:C:G	EyeGEx	EyeGEx	ENSG00000225138	G	1.01062e-05	0.316524	0.00652728	G	+	5	429818	CTD-2228K2.7	1
5:430059:A:G	EyeGEx	EyeGEx	ENSG00000171368	A	1.27187e-07	0.376776	9.77098932831322e-05	A	+	5	430059	TPPP	1
5:430059:A:G	EyeGEx	EyeGEx	ENSG00000180104	A	1.26953e-22	-0.670034	8.45401347460523e-20	A	-	5	430059	EXOC3	1
5:430059:A:G	EyeGEx	EyeGEx	ENSG00000221990	A	3.40385e-05	0.29755	0.0215122	A	+	5	430059	C5orf55	1
5:430059:A:G	EyeGEx	EyeGEx	ENSG00000225138	A	1.01011e-05	0.31651	0.00652399	A	+	5	430059	CTD-2228K2.7	1
5:430217:C:T	EyeGEx	EyeGEx	ENSG00000171368	T	3.26185e-06	0.332818	0.00250588	T	+	5	430217	TPPP	1
5:430217:C:T	EyeGEx	EyeGEx	ENSG00000180104	T	1.56897e-15	-0.555747	1.04480347224968e-12	T	-	5	430217	EXOC3	1
5:430217:C:T	EyeGEx	EyeGEx	ENSG00000225138	T	1.45985e-07	0.374634	9.42871462736668e-05	T	+	5	430217	CTD-2228K2.7	1
5:434722:C:G	EyeGEx	EyeGEx	ENSG00000171368	C	1.71692e-07	0.372139	0.0001319	C	+	5	434722	TPPP	1
5:434722:C:G	EyeGEx	EyeGEx	ENSG00000180104	C	4.24394e-23	-0.675196	2.82611091864045e-20	C	-	5	434722	EXOC3	1
5:434722:C:G	EyeGEx	EyeGEx	ENSG00000221990	C	4.70024e-05	0.291656	0.0297054	C	+	5	434722	C5orf55	1
5:434722:C:G	EyeGEx	EyeGEx	ENSG00000225138	C	1.35649e-05	0.31132	0.00876114	C	+	5	434722	CTD-2228K2.7	1
5:436981:A:G	EyeGEx	EyeGEx	ENSG00000171368	G	2.76357e-05	0.302635	0.0212308	G	+	5	436981	TPPP	1
5:436981:A:G	EyeGEx	EyeGEx	ENSG00000180104	G	7.25533e-20	-0.632928	4.83144609286173e-17	G	-	5	436981	EXOC3	1
5:436981:A:G	EyeGEx	EyeGEx	ENSG00000206077	G	5.89992e-05	-0.290234	0.0486923	G	-	5	436981	ZDHHC11B	1
5:436981:A:G	EyeGEx	EyeGEx	ENSG00000221990	G	7.24754e-06	0.323363	0.00458042	G	+	5	436981	C5orf55	1
5:436981:A:G	EyeGEx	EyeGEx	ENSG00000225138	G	3.92595e-06	0.33242	0.00253565	G	+	5	436981	CTD-2228K2.7	1
5:437542:C:T	EyeGEx	EyeGEx	ENSG00000171368	C	1.58495e-07	0.372824	0.000121762	C	+	5	437542	TPPP	1
5:437542:C:T	EyeGEx	EyeGEx	ENSG00000180104	C	1.78557e-22	-0.665857	1.18904104982559e-19	C	-	5	437542	EXOC3	1
5:437542:C:T	EyeGEx	EyeGEx	ENSG00000221990	C	6.09399e-05	0.287123	0.0385139	C	+	5	437542	C5orf55	1
5:437542:C:T	EyeGEx	EyeGEx	ENSG00000225138	C	1.06269e-05	0.314758	0.00686358	C	+	5	437542	CTD-2228K2.7	1
5:437586:A:G	EyeGEx	EyeGEx	ENSG00000171368	A	1.58565e-07	0.372821	0.000121816	A	+	5	437586	TPPP	1
5:437586:A:G	EyeGEx	EyeGEx	ENSG00000180104	A	1.78227e-22	-0.665872	1.18684352440546e-19	A	-	5	437586	EXOC3	1
5:437586:A:G	EyeGEx	EyeGEx	ENSG00000221990	A	6.09998e-05	0.287108	0.0385517	A	+	5	437586	C5orf55	1
5:437586:A:G	EyeGEx	EyeGEx	ENSG00000225138	A	1.06322e-05	0.314753	0.006867	A	+	5	437586	CTD-2228K2.7	1
5:437667:A:G	EyeGEx	EyeGEx	ENSG00000171368	A	1.5867e-07	0.372816	0.000121896	A	+	5	437667	TPPP	1
5:437667:A:G	EyeGEx	EyeGEx	ENSG00000180104	A	1.77736e-22	-0.665896	1.18357387294702e-19	A	-	5	437667	EXOC3	1
5:437667:A:G	EyeGEx	EyeGEx	ENSG00000221990	A	6.10899e-05	0.287087	0.0386087	A	+	5	437667	C5orf55	1
5:437667:A:G	EyeGEx	EyeGEx	ENSG00000225138	A	1.06401e-05	0.314744	0.00687211	A	+	5	437667	CTD-2228K2.7	1
5:437862:C:G	EyeGEx	EyeGEx	ENSG00000171368	C	1.5888e-07	0.372807	0.000122058	C	+	5	437862	TPPP	1
5:437862:C:G	EyeGEx	EyeGEx	ENSG00000180104	C	1.76758e-22	-0.665943	1.17706120670191e-19	C	-	5	437862	EXOC3	1
5:437862:C:G	EyeGEx	EyeGEx	ENSG00000221990	C	6.12705e-05	0.287043	0.0387228	C	+	5	437862	C5orf55	1
5:437862:C:G	EyeGEx	EyeGEx	ENSG00000225138	C	1.06561e-05	0.314728	0.00688244	C	+	5	437862	CTD-2228K2.7	1
10:70730197:C:G	EyeGEx	EyeGEx	ENSG00000165730	G	7.43664e-05	0.403043	0.0445954	G	+	10	70730197	STOX1	1
10:70733935:C:T	EyeGEx	EyeGEx	ENSG00000165730	T	6.45982e-05	0.40533	0.0387377	T	+	10	70733935	STOX1	1
10:70736879:A:C	EyeGEx	EyeGEx	ENSG00000165730	C	6.45982e-05	0.40533	0.0387377	C	+	10	70736879	STOX1	1
10:70737972:C:T	EyeGEx	EyeGEx	ENSG00000165730	C	6.45982e-05	0.40533	0.0387377	C	+	10	70737972	STOX1	1
10:70740091:A:G	EyeGEx	EyeGEx	ENSG00000165730	A	6.45982e-05	0.40533	0.0387377	A	+	10	70740091	STOX1	1
10:70884514:A:G	EyeGEx	EyeGEx	ENSG00000156502	G	9.45808e-07	-0.406124	0.000682742	G	-	10	70884514	SUPV3L1	1
10:70890541:C:T	EyeGEx	EyeGEx	ENSG00000156502	C	9.37935e-07	-0.406091	0.000677059	C	-	10	70890541	SUPV3L1	1
10:70902716:A:G	EyeGEx	EyeGEx	ENSG00000156502	A	9.1195e-07	-0.411909	0.000658301	A	-	10	70902716	SUPV3L1	1
10:70903844:C:G	EyeGEx	EyeGEx	ENSG00000156502	G	1.46344e-06	-0.400572	0.0010564	G	-	10	70903844	SUPV3L1	1
10:70944798:C:T	EyeGEx	EyeGEx	ENSG00000156502	C	5.80143e-07	-0.416167	0.000418783	C	-	10	70944798	SUPV3L1	1
10:121652694:A:T	EyeGEx	EyeGEx	ENSG00000197771	T	3.54286e-08	-0.844616	2.28141881657435e-05	A	+	10	121652694	MCMBP	1
10:121656067:A:G	EyeGEx	EyeGEx	ENSG00000197771	A	5.11568e-09	-0.923347	3.29423364501365e-06	G	+	10	121656067	MCMBP	1
10:121657558:A:G	EyeGEx	EyeGEx	ENSG00000197771	G	5.13412e-09	-0.906347	3.30610805240701e-06	A	+	10	121657558	MCMBP	1
10:121659077:A:T	EyeGEx	EyeGEx	ENSG00000197771	A	5.13098e-09	-0.90638	3.30408605461877e-06	T	+	10	121659077	MCMBP	1
10:121659612:G:T	EyeGEx	EyeGEx	ENSG00000197771	T	6.31107e-08	-0.832654	4.06400305140984e-05	G	+	10	121659612	MCMBP	1
10:121659707:A:G	EyeGEx	EyeGEx	ENSG00000197771	G	5.12109e-09	-0.906448	3.29771740553415e-06	A	+	10	121659707	MCMBP	1
10:121660326:C:T	EyeGEx	EyeGEx	ENSG00000197771	T	5.11555e-09	-0.906513	3.29414993172943e-06	C	+	10	121660326	MCMBP	1
10:121660709:C:T	EyeGEx	EyeGEx	ENSG00000197771	T	4.92382e-09	-0.907313	3.17068571646216e-06	C	+	10	121660709	MCMBP	1
10:121664714:A:G	EyeGEx	EyeGEx	ENSG00000197771	A	4.87505e-09	-0.924656	3.13928035591042e-06	G	+	10	121664714	MCMBP	1
10:121668501:A:C	EyeGEx	EyeGEx	ENSG00000197771	A	5.0936e-09	-0.906749	3.28001526566195e-06	C	+	10	121668501	MCMBP	1
10:121668656:G:T	EyeGEx	EyeGEx	ENSG00000197771	G	4.91379e-09	-0.907501	3.16422691460991e-06	T	+	10	121668656	MCMBP	1
10:121669997:A:T	EyeGEx	EyeGEx	ENSG00000197771	A	5.09733e-09	-0.906773	3.28241719297091e-06	T	+	10	121669997	MCMBP	1
10:121671651:C:T	EyeGEx	EyeGEx	ENSG00000197771	C	5.09005e-09	-0.906846	3.27772924905423e-06	T	+	10	121671651	MCMBP	1
10:121672920:A:T	EyeGEx	EyeGEx	ENSG00000197771	A	5.07762e-09	-0.906964	3.2697249711855e-06	T	+	10	121672920	MCMBP	1
10:121674000:A:G	EyeGEx	EyeGEx	ENSG00000197771	G	5.07059e-09	-0.907019	3.26519801435386e-06	A	+	10	121674000	MCMBP	1
10:121674010:A:G	EyeGEx	EyeGEx	ENSG00000197771	G	5.07454e-09	-0.906997	3.26774161029767e-06	A	+	10	121674010	MCMBP	1
10:121675880:C:T	EyeGEx	EyeGEx	ENSG00000197771	T	5.05528e-09	-0.907141	3.25533916526534e-06	C	+	10	121675880	MCMBP	1
10:121680142:C:T	EyeGEx	EyeGEx	ENSG00000197771	T	7.43809e-09	-0.89027	4.7897457097863e-06	C	+	10	121680142	MCMBP	1
10:121680359:A:G	EyeGEx	EyeGEx	ENSG00000197771	G	5.03661e-09	-0.90729	3.24331664975374e-06	A	+	10	121680359	MCMBP	1
10:121681422:A:G	EyeGEx	EyeGEx	ENSG00000197771	G	5.03542e-09	-0.907372	3.2425503512289e-06	A	+	10	121681422	MCMBP	1
10:121682441:C:T	EyeGEx	EyeGEx	ENSG00000197771	C	5.03542e-09	-0.907372	3.2425503512289e-06	T	+	10	121682441	MCMBP	1
10:121685559:A:G	EyeGEx	EyeGEx	ENSG00000197771	A	5.08307e-09	-0.907214	3.27323448963961e-06	G	+	10	121685559	MCMBP	1
10:121685895:A:G	EyeGEx	EyeGEx	ENSG00000197771	G	5.03635e-09	-0.907486	3.24314922318529e-06	A	+	10	121685895	MCMBP	1
10:121686228:C:T	EyeGEx	EyeGEx	ENSG00000197771	C	5.02987e-09	-0.907536	3.23897643794077e-06	T	+	10	121686228	MCMBP	1
10:121686714:A:G	EyeGEx	EyeGEx	ENSG00000197771	A	5.02987e-09	-0.907536	3.23897643794077e-06	G	+	10	121686714	MCMBP	1
10:121687420:C:G	EyeGEx	EyeGEx	ENSG00000197771	C	5.02987e-09	-0.907536	3.23897643794077e-06	G	+	10	121687420	MCMBP	1
10:121692152:A:C	EyeGEx	EyeGEx	ENSG00000197771	C	4.99631e-09	-0.90795	3.21736553164353e-06	A	+	10	121692152	MCMBP	1
10:121692777:A:G	EyeGEx	EyeGEx	ENSG00000197771	G	4.99854e-09	-0.908013	3.21880153644218e-06	A	+	10	121692777	MCMBP	1
10:121693020:A:G	EyeGEx	EyeGEx	ENSG00000197771	A	4.98156e-09	-0.908094	3.20786729362552e-06	G	+	10	121693020	MCMBP	1
10:121693246:A:G	EyeGEx	EyeGEx	ENSG00000197771	G	4.99254e-09	-0.908082	3.21493784640096e-06	A	+	10	121693246	MCMBP	1
10:121693664:A:G	EyeGEx	EyeGEx	ENSG00000197771	A	4.99737e-09	-0.908079	3.21804811688414e-06	G	+	10	121693664	MCMBP	1
10:121694150:C:G	EyeGEx	EyeGEx	ENSG00000197771	G	4.99276e-09	-0.908161	3.2150795150358e-06	C	+	10	121694150	MCMBP	1
10:121695024:A:G	EyeGEx	EyeGEx	ENSG00000197771	A	4.96783e-09	-0.908347	3.19902588291452e-06	G	+	10	121695024	MCMBP	1
10:121695307:A:G	EyeGEx	EyeGEx	ENSG00000197771	G	4.97123e-09	-0.908332	3.20121530727122e-06	A	+	10	121695307	MCMBP	1
10:121695460:G:T	EyeGEx	EyeGEx	ENSG00000197771	T	4.96826e-09	-0.908365	3.19930278070081e-06	G	+	10	121695460	MCMBP	1
10:121699523:A:T	EyeGEx	EyeGEx	ENSG00000197771	T	4.91751e-09	-0.908984	3.16662240243547e-06	A	+	10	121699523	MCMBP	1
10:121700136:A:G	EyeGEx	EyeGEx	ENSG00000197771	G	4.91171e-09	-0.909052	3.16288750206229e-06	A	+	10	121700136	MCMBP	1
10:121700201:A:T	EyeGEx	EyeGEx	ENSG00000197771	A	4.91171e-09	-0.909052	3.16288750206229e-06	T	+	10	121700201	MCMBP	1
10:121700959:C:T	EyeGEx	EyeGEx	ENSG00000197771	C	4.90292e-09	-0.90915	3.1572271961519e-06	T	+	10	121700959	MCMBP	1
10:121701486:C:T	EyeGEx	EyeGEx	ENSG00000197771	T	4.89896e-09	-0.909189	3.15467716072469e-06	C	+	10	121701486	MCMBP	1
10:121701786:G:T	EyeGEx	EyeGEx	ENSG00000197771	G	4.88983e-09	-0.909271	3.14879791237863e-06	T	+	10	121701786	MCMBP	1
10:121702010:A:G	EyeGEx	EyeGEx	ENSG00000197771	G	4.89021e-09	-0.909288	3.14904261274791e-06	A	+	10	121702010	MCMBP	1
11:457879:C:T	EyeGEx	EyeGEx	ENSG00000023191	T	7.22422e-06	-0.531058	0.00453038	C	+	11	457879	RNH1	1
11:458595:A:G	EyeGEx	EyeGEx	ENSG00000023191	A	2.60044e-07	-0.484413	0.000163076	G	+	11	458595	RNH1	1
11:458595:A:G	EyeGEx	EyeGEx	ENSG00000174775	A	2.69655e-06	-0.442591	0.00174256	G	+	11	458595	HRAS	1
11:460765:A:G	EyeGEx	EyeGEx	ENSG00000023191	G	2.47298e-10	-0.564307	1.5508307663309e-07	A	+	11	460765	RNH1	1
11:460765:A:G	EyeGEx	EyeGEx	ENSG00000174775	G	1.91799e-06	-0.429139	0.00123944	A	+	11	460765	HRAS	1
11:462684:C:T	EyeGEx	EyeGEx	ENSG00000023191	T	2.30974e-07	-0.485412	0.000144846	C	+	11	462684	RNH1	1
11:462684:C:T	EyeGEx	EyeGEx	ENSG00000174775	T	2.44073e-06	-0.443525	0.00157725	C	+	11	462684	HRAS	1
11:462855:A:G	EyeGEx	EyeGEx	ENSG00000023191	A	2.47954e-10	-0.564286	1.55494460866975e-07	G	+	11	462855	RNH1	1
11:462855:A:G	EyeGEx	EyeGEx	ENSG00000174775	A	1.91637e-06	-0.429164	0.0012384	G	+	11	462855	HRAS	1
11:467368:A:G	EyeGEx	EyeGEx	ENSG00000023191	G	2.48895e-10	-0.564255	1.56084571482959e-07	A	+	11	467368	RNH1	1
11:467368:A:G	EyeGEx	EyeGEx	ENSG00000174775	G	1.9141e-06	-0.429199	0.00123693	A	+	11	467368	HRAS	1
11:473300:G:T	EyeGEx	EyeGEx	ENSG00000023191	T	2.50273e-10	-0.564287	1.56948729218163e-07	G	+	11	473300	RNH1	1
11:473300:G:T	EyeGEx	EyeGEx	ENSG00000174775	T	1.88504e-06	-0.429549	0.00121815	G	+	11	473300	HRAS	1
11:477623:C:T	EyeGEx	EyeGEx	ENSG00000023191	T	2.64246e-10	-0.563663	1.65711338821937e-07	C	+	11	477623	RNH1	1
11:477623:C:T	EyeGEx	EyeGEx	ENSG00000174775	T	1.8734e-06	-0.429726	0.00121063	C	+	11	477623	HRAS	1
11:484469:C:T	EyeGEx	EyeGEx	ENSG00000023191	T	3.10532e-10	-0.561963	1.94737757495113e-07	C	+	11	484469	RNH1	1
11:484469:C:T	EyeGEx	EyeGEx	ENSG00000174775	T	1.77956e-06	-0.430956	0.00114999	C	+	11	484469	HRAS	1
11:486414:A:G	EyeGEx	EyeGEx	ENSG00000023191	A	3.63158e-10	-0.560179	2.27740054282362e-07	G	+	11	486414	RNH1	1
11:486414:A:G	EyeGEx	EyeGEx	ENSG00000174775	A	1.70572e-06	-0.431922	0.00110227	G	+	11	486414	HRAS	1
11:487101:C:T	EyeGEx	EyeGEx	ENSG00000023191	T	3.84183e-10	-0.559506	2.40925044400401e-07	C	+	11	487101	RNH1	1
11:487101:C:T	EyeGEx	EyeGEx	ENSG00000174775	T	1.68142e-06	-0.432231	0.00108657	C	+	11	487101	HRAS	1
11:487136:A:G	EyeGEx	EyeGEx	ENSG00000023191	A	2.53631e-07	-0.485236	0.000159055	G	+	11	487136	RNH1	1
11:487136:A:G	EyeGEx	EyeGEx	ENSG00000174775	A	2.80977e-06	-0.44218	0.00181573	G	+	11	487136	HRAS	1
11:487201:C:T	EyeGEx	EyeGEx	ENSG00000023191	C	3.86055e-10	-0.559389	2.42098994531243e-07	T	+	11	487201	RNH1	1
11:487201:C:T	EyeGEx	EyeGEx	ENSG00000174775	C	1.67432e-06	-0.432265	0.00108198	T	+	11	487201	HRAS	1
11:490035:C:T	EyeGEx	EyeGEx	ENSG00000023191	T	6.02497e-10	-0.62003	3.77831961529032e-07	C	+	11	490035	RNH1	1
11:490035:C:T	EyeGEx	EyeGEx	ENSG00000174775	T	1.09542e-05	-0.445639	0.00707882	C	+	11	490035	HRAS	1
11:491334:A:C	EyeGEx	EyeGEx	ENSG00000023191	C	8.06438e-10	-0.549858	5.05725425008838e-07	A	+	11	491334	RNH1	1
11:491334:A:C	EyeGEx	EyeGEx	ENSG00000174775	C	1.50526e-06	-0.434408	0.000972728	A	+	11	491334	HRAS	1
11:494662:A:G	EyeGEx	EyeGEx	ENSG00000023191	A	1.10641e-09	-0.5453	6.93840899714582e-07	G	+	11	494662	RNH1	1
11:494662:A:G	EyeGEx	EyeGEx	ENSG00000174775	A	1.44468e-06	-0.434927	0.00093358	G	+	11	494662	HRAS	1
11:495699:A:C	EyeGEx	EyeGEx	ENSG00000023191	C	1.10641e-09	-0.5453	6.93840899714582e-07	A	+	11	495699	RNH1	1
11:495699:A:C	EyeGEx	EyeGEx	ENSG00000174775	C	1.44468e-06	-0.434927	0.00093358	A	+	11	495699	HRAS	1
11:495892:C:G	EyeGEx	EyeGEx	ENSG00000023191	G	1.10641e-09	-0.5453	6.93840899714582e-07	C	+	11	495892	RNH1	1
11:495892:C:G	EyeGEx	EyeGEx	ENSG00000174775	G	1.44468e-06	-0.434927	0.00093358	C	+	11	495892	HRAS	1
11:496193:G:T	EyeGEx	EyeGEx	ENSG00000023191	G	1.61067e-09	-0.54036	1.01006744510921e-06	T	+	11	496193	RNH1	1
11:496193:G:T	EyeGEx	EyeGEx	ENSG00000174775	G	1.46363e-06	-0.434877	0.000945826	T	+	11	496193	HRAS	1
11:501468:A:G	EyeGEx	EyeGEx	ENSG00000023191	A	1.10641e-09	-0.5453	6.93840899714582e-07	G	+	11	501468	RNH1	1
11:501468:A:G	EyeGEx	EyeGEx	ENSG00000174775	A	1.44468e-06	-0.434927	0.00093358	G	+	11	501468	HRAS	1
11:502371:A:G	EyeGEx	EyeGEx	ENSG00000023191	A	1.10684e-09	-0.545301	6.94110557063013e-07	G	+	11	502371	RNH1	1
11:502371:A:G	EyeGEx	EyeGEx	ENSG00000174775	A	1.43721e-06	-0.435023	0.000928753	G	+	11	502371	HRAS	1
11:503385:C:G	EyeGEx	EyeGEx	ENSG00000023191	G	1.10791e-09	-0.545321	6.94781564883526e-07	C	+	11	503385	RNH1	1
11:503385:C:G	EyeGEx	EyeGEx	ENSG00000174775	G	1.41704e-06	-0.435297	0.000915719	C	+	11	503385	HRAS	1
11:503710:C:T	EyeGEx	EyeGEx	ENSG00000023191	T	1.10829e-09	-0.545322	6.95019866726326e-07	C	+	11	503710	RNH1	1
11:503710:C:T	EyeGEx	EyeGEx	ENSG00000174775	T	1.41119e-06	-0.435373	0.000911939	C	+	11	503710	HRAS	1
11:504411:C:G	EyeGEx	EyeGEx	ENSG00000023191	G	1.10941e-09	-0.545334	6.95722230052471e-07	C	+	11	504411	RNH1	1
11:504411:C:G	EyeGEx	EyeGEx	ENSG00000174775	G	1.39638e-06	-0.435578	0.000902368	C	+	11	504411	HRAS	1
11:506229:C:T	EyeGEx	EyeGEx	ENSG00000023191	T	1.1118e-09	-0.545349	6.97221023221656e-07	C	+	11	506229	RNH1	1
11:506229:C:T	EyeGEx	EyeGEx	ENSG00000174775	T	1.36229e-06	-0.436046	0.000880338	C	+	11	506229	HRAS	1
11:506442:G:T	EyeGEx	EyeGEx	ENSG00000023191	T	1.11142e-09	-0.545366	6.96982721378857e-07	G	+	11	506442	RNH1	1
11:506442:G:T	EyeGEx	EyeGEx	ENSG00000174775	T	1.35818e-06	-0.436108	0.000877682	G	+	11	506442	HRAS	1
11:506596:C:T	EyeGEx	EyeGEx	ENSG00000023191	T	1.11163e-09	-0.545366	6.97114414502509e-07	C	+	11	506596	RNH1	1
11:506596:C:T	EyeGEx	EyeGEx	ENSG00000174775	T	1.35539e-06	-0.436146	0.00087588	C	+	11	506596	HRAS	1
12:48213991:C:T	EyeGEx	EyeGEx	ENSG00000061273	T	3.99146e-15	0.616013	2.13887864471281e-12	T	+	12	48213991	HDAC7	1
12:48214833:A:C	EyeGEx	EyeGEx	ENSG00000061273	A	4.47173e-15	0.61577	2.39623791843627e-12	A	+	12	48214833	HDAC7	1
12:48217013:A:G	EyeGEx	EyeGEx	ENSG00000061273	G	5.26007e-15	0.614927	2.81868073153546e-12	G	+	12	48217013	HDAC7	1
12:48223554:C:G	EyeGEx	EyeGEx	ENSG00000061273	G	1.85516e-13	0.576948	9.9411295779625e-11	G	+	12	48223554	HDAC7	1
12:104331157:C:T	EyeGEx	EyeGEx	ENSG00000111696	T	4.03979e-06	-0.478811	0.00259876	C	+	12	104331157	NT5DC3	1
12:104331157:C:T	EyeGEx	EyeGEx	ENSG00000166598	T	2.25803e-09	-0.615507	1.44068336032493e-06	C	+	12	104331157	HSP90B1	1
12:104331157:C:T	EyeGEx	EyeGEx	ENSG00000214198	T	5.71057e-11	-0.671564	3.70584229726818e-08	C	+	12	104331157	RP11-642P15.1	1
12:104333828:C:T	EyeGEx	EyeGEx	ENSG00000111696	T	4.04036e-06	-0.478269	0.00259913	C	+	12	104333828	NT5DC3	1
12:104333828:C:T	EyeGEx	EyeGEx	ENSG00000166598	T	2.45602e-09	-0.613466	1.56700626060116e-06	C	+	12	104333828	HSP90B1	1
12:104333828:C:T	EyeGEx	EyeGEx	ENSG00000214198	T	6.64261e-11	-0.668613	4.31068441543604e-08	C	+	12	104333828	RP11-642P15.1	1
12:104334303:C:T	EyeGEx	EyeGEx	ENSG00000111696	C	4.03852e-06	-0.478289	0.00259794	T	+	12	104334303	NT5DC3	1
12:104334303:C:T	EyeGEx	EyeGEx	ENSG00000166598	C	2.43036e-09	-0.613648	1.55063449626413e-06	T	+	12	104334303	HSP90B1	1
12:104334303:C:T	EyeGEx	EyeGEx	ENSG00000214198	C	6.70453e-11	-0.668493	4.35086705132823e-08	T	+	12	104334303	RP11-642P15.1	1
12:104337667:A:G	EyeGEx	EyeGEx	ENSG00000111696	A	4.07906e-06	-0.478047	0.00262402	G	+	12	104337667	NT5DC3	1
12:104337667:A:G	EyeGEx	EyeGEx	ENSG00000166598	A	2.4904e-09	-0.613215	1.58894161749543e-06	G	+	12	104337667	HSP90B1	1
12:104337667:A:G	EyeGEx	EyeGEx	ENSG00000214198	A	6.84843e-11	-0.668139	4.44425014733736e-08	G	+	12	104337667	RP11-642P15.1	1
14:74480794:C:G	EyeGEx	EyeGEx	ENSG00000119636	C	1.48819e-07	-0.475456	6.72242108876016e-05	C	-	14	74480794	CCDC176	1
14:74480794:C:G	EyeGEx	EyeGEx	ENSG00000140043	C	6.00289e-24	-0.873259	2.86055674236328e-21	C	-	14	74480794	PTGR2	1
14:74480794:C:G	EyeGEx	EyeGEx	ENSG00000187097	C	9.05549e-05	-0.356929	0.0399914	C	-	14	74480794	ENTPD5	1
14:74480794:C:G	EyeGEx	EyeGEx	ENSG00000205659	C	2.9146e-07	-0.464502	0.000128172	C	-	14	74480794	LIN52	1
14:74480794:C:G	EyeGEx	EyeGEx	ENSG00000258653	C	3.52337e-05	-0.376765	0.0164719	C	-	14	74480794	RP5-1021I20.4	1
14:74480794:C:G	EyeGEx	EyeGEx	ENSG00000259065	C	3.28907e-50	1.20276	1.64523951946696e-47	C	+	14	74480794	RP5-1021I20.1	1
14:74485133:C:T	EyeGEx	EyeGEx	ENSG00000119636	T	1.48594e-07	-0.475486	6.71225743529541e-05	T	-	14	74485133	CCDC176	1
14:74485133:C:T	EyeGEx	EyeGEx	ENSG00000140043	T	6.01934e-24	-0.873249	2.86839565968675e-21	T	-	14	74485133	PTGR2	1
14:74485133:C:T	EyeGEx	EyeGEx	ENSG00000187097	T	9.06669e-05	-0.356906	0.0400409	T	-	14	74485133	ENTPD5	1
14:74485133:C:T	EyeGEx	EyeGEx	ENSG00000205659	T	2.91967e-07	-0.464479	0.000128395	T	-	14	74485133	LIN52	1
14:74485133:C:T	EyeGEx	EyeGEx	ENSG00000258653	T	3.52042e-05	-0.376787	0.0164581	T	-	14	74485133	RP5-1021I20.4	1
14:74485133:C:T	EyeGEx	EyeGEx	ENSG00000259065	T	3.33616e-50	1.20272	1.6687946061546e-47	T	+	14	74485133	RP5-1021I20.1	1
2:68385097:A:G	eQTLcatalogue	Alasoo_2018_ge_macrophage_IFNg_Salmonella	ENSG00000221823	A	7.21383e-07	-0.134132	0.00360692	G	+	2	68385097	PPP3R1	1
2:68393144:A:T	eQTLcatalogue	Alasoo_2018_ge_macrophage_IFNg_Salmonella	ENSG00000221823	T	5.59537e-07	-0.136186	0.00279768	A	+	2	68393144	PPP3R1	1
2:68394184:C:T	eQTLcatalogue	Alasoo_2018_ge_macrophage_IFNg_Salmonella	ENSG00000221823	C	5.76228e-07	-0.135959	0.00288114	T	+	2	68394184	PPP3R1	1
2:68395631:A:G	eQTLcatalogue	Alasoo_2018_ge_macrophage_IFNg_Salmonella	ENSG00000221823	G	5.39356e-07	-0.136487	0.00269678	A	+	2	68395631	PPP3R1	1
2:68398919:C:G	eQTLcatalogue	Alasoo_2018_ge_macrophage_IFNg_Salmonella	ENSG00000221823	G	5.11724e-07	-0.136946	0.00255862	C	+	2	68398919	PPP3R1	1
2:68399190:C:T	eQTLcatalogue	Alasoo_2018_ge_macrophage_IFNg_Salmonella	ENSG00000221823	C	5.02107e-07	-0.136995	0.00251053	T	+	2	68399190	PPP3R1	1
2:68402012:G:T	eQTLcatalogue	Alasoo_2018_ge_macrophage_IFNg_Salmonella	ENSG00000221823	G	4.89257e-07	-0.13723	0.00244628	T	+	2	68402012	PPP3R1	1
2:68402830:C:G	eQTLcatalogue	Alasoo_2018_ge_macrophage_IFNg_Salmonella	ENSG00000221823	G	4.8383e-07	-0.137251	0.00241915	C	+	2	68402830	PPP3R1	1
2:68410372:A:C	eQTLcatalogue	Alasoo_2018_ge_macrophage_IFNg_Salmonella	ENSG00000221823	C	4.55483e-07	-0.137572	0.00227742	A	+	2	68410372	PPP3R1	1
2:68410660:G:T	eQTLcatalogue	Alasoo_2018_ge_macrophage_IFNg_Salmonella	ENSG00000221823	T	4.55165e-07	-0.137574	0.00227582	G	+	2	68410660	PPP3R1	1
2:68411414:A:G	eQTLcatalogue	Alasoo_2018_ge_macrophage_IFNg_Salmonella	ENSG00000221823	G	4.54098e-07	-0.137577	0.00227049	A	+	2	68411414	PPP3R1	1
2:68418868:A:T	eQTLcatalogue	Alasoo_2018_ge_macrophage_IFNg_Salmonella	ENSG00000221823	A	4.4048e-07	-0.137449	0.0022024	T	+	2	68418868	PPP3R1	1
2:68419487:A:G	eQTLcatalogue	Alasoo_2018_ge_macrophage_IFNg_Salmonella	ENSG00000221823	G	4.40355e-07	-0.137406	0.00220177	A	+	2	68419487	PPP3R1	1
2:68420070:G:T	eQTLcatalogue	Alasoo_2018_ge_macrophage_IFNg_Salmonella	ENSG00000221823	G	4.3998e-07	-0.137367	0.0021999	T	+	2	68420070	PPP3R1	1
2:68421049:A:G	eQTLcatalogue	Alasoo_2018_ge_macrophage_IFNg_Salmonella	ENSG00000221823	G	4.40558e-07	-0.137298	0.00220279	A	+	2	68421049	PPP3R1	1
2:68422771:A:G	eQTLcatalogue	Alasoo_2018_ge_macrophage_IFNg_Salmonella	ENSG00000221823	G	4.43435e-07	-0.137197	0.00221718	A	+	2	68422771	PPP3R1	1
2:68423530:A:G	eQTLcatalogue	Alasoo_2018_ge_macrophage_IFNg_Salmonella	ENSG00000221823	G	4.42505e-07	-0.137109	0.00221253	A	+	2	68423530	PPP3R1	1
2:68430925:C:T	eQTLcatalogue	Alasoo_2018_ge_macrophage_IFNg_Salmonella	ENSG00000221823	C	4.61001e-07	-0.136099	0.002305	T	+	2	68430925	PPP3R1	1
2:68431259:A:G	eQTLcatalogue	Alasoo_2018_ge_macrophage_IFNg_Salmonella	ENSG00000221823	G	4.60003e-07	-0.136055	0.00230002	A	+	2	68431259	PPP3R1	1
2:68433831:A:G	eQTLcatalogue	Alasoo_2018_ge_macrophage_IFNg_Salmonella	ENSG00000221823	G	4.73656e-07	-0.135559	0.00236828	A	+	2	68433831	PPP3R1	1
2:68435431:C:G	eQTLcatalogue	Alasoo_2018_ge_macrophage_IFNg_Salmonella	ENSG00000221823	C	4.8172e-07	-0.135988	0.0024086	G	+	2	68435431	PPP3R1	1
2:68438614:C:T	eQTLcatalogue	Alasoo_2018_ge_macrophage_IFNg_Salmonella	ENSG00000221823	C	4.90627e-07	-0.136522	0.00245313	T	+	2	68438614	PPP3R1	1
2:68439960:C:T	eQTLcatalogue	Alasoo_2018_ge_macrophage_IFNg_Salmonella	ENSG00000221823	C	5.76928e-07	-0.13639	0.00288464	T	+	2	68439960	PPP3R1	1
2:68443651:A:G	eQTLcatalogue	Alasoo_2018_ge_macrophage_IFNg_Salmonella	ENSG00000221823	A	5.8832e-07	-0.136996	0.0029416	G	+	2	68443651	PPP3R1	1
2:68443835:A:T	eQTLcatalogue	Alasoo_2018_ge_macrophage_IFNg_Salmonella	ENSG00000221823	A	5.94634e-07	-0.136925	0.00297317	T	+	2	68443835	PPP3R1	1
2:68446936:C:T	eQTLcatalogue	Alasoo_2018_ge_macrophage_IFNg_Salmonella	ENSG00000221823	C	5.18801e-07	-0.137635	0.002594	T	+	2	68446936	PPP3R1	1
2:68457573:C:T	eQTLcatalogue	Alasoo_2018_ge_macrophage_IFNg_Salmonella	ENSG00000221823	C	5.95109e-07	-0.138893	0.00297554	T	+	2	68457573	PPP3R1	1
2:68457854:A:G	eQTLcatalogue	Alasoo_2018_ge_macrophage_IFNg_Salmonella	ENSG00000221823	A	5.9718e-07	-0.138921	0.0029859	G	+	2	68457854	PPP3R1	1
2:68463612:A:G	eQTLcatalogue	Alasoo_2018_ge_macrophage_IFNg_Salmonella	ENSG00000221823	G	6.50134e-07	-0.139471	0.00325067	A	+	2	68463612	PPP3R1	1
2:68467910:A:C	eQTLcatalogue	Alasoo_2018_ge_macrophage_IFNg_Salmonella	ENSG00000221823	A	6.84291e-07	-0.139576	0.00342146	C	+	2	68467910	PPP3R1	1
2:68475595:A:C	eQTLcatalogue	Alasoo_2018_ge_macrophage_IFNg_Salmonella	ENSG00000221823	C	7.73834e-07	-0.139816	0.00386917	A	+	2	68475595	PPP3R1	1
2:68477248:C:T	eQTLcatalogue	Alasoo_2018_ge_macrophage_IFNg_Salmonella	ENSG00000221823	T	7.73847e-07	-0.140177	0.00386923	C	+	2	68477248	PPP3R1	1
2:68478919:A:G	eQTLcatalogue	Alasoo_2018_ge_macrophage_IFNg_Salmonella	ENSG00000221823	A	9.29636e-07	-0.140324	0.00464818	G	+	2	68478919	PPP3R1	1
2:238877170:C:G	eQTLcatalogue	Alasoo_2018_ge_macrophage_IFNg_Salmonella	ENSG00000184182	C	2.25336e-09	-0.266896	1.12668e-05	C	-	2	238877170	UBE2F	1
2:238877409:A:C	eQTLcatalogue	Alasoo_2018_ge_macrophage_IFNg_Salmonella	ENSG00000184182	A	2.06407e-09	-0.267479	1.03204e-05	A	-	2	238877409	UBE2F	1
2:238893362:C:T	eQTLcatalogue	Alasoo_2018_ge_macrophage_IFNg_Salmonella	ENSG00000184182	T	1.38128e-09	-0.263827	6.9064e-06	T	-	2	238893362	UBE2F	1
2:238895507:A:G	eQTLcatalogue	Alasoo_2018_ge_macrophage_IFNg_Salmonella	ENSG00000184182	G	1.28382e-09	-0.264324	6.4191e-06	G	-	2	238895507	UBE2F	1
2:238907642:A:C	eQTLcatalogue	Alasoo_2018_ge_macrophage_IFNg_Salmonella	ENSG00000184182	A	8.20034e-10	-0.266108	4.10017e-06	A	-	2	238907642	UBE2F	1
2:238909269:A:G	eQTLcatalogue	Alasoo_2018_ge_macrophage_IFNg_Salmonella	ENSG00000184182	A	7.69111e-10	-0.266233	3.84556e-06	A	-	2	238909269	UBE2F	1
2:238910663:C:T	eQTLcatalogue	Alasoo_2018_ge_macrophage_IFNg_Salmonella	ENSG00000184182	T	7.31592e-10	-0.266291	3.65796e-06	T	-	2	238910663	UBE2F	1
2:238912120:A:C	eQTLcatalogue	Alasoo_2018_ge_macrophage_IFNg_Salmonella	ENSG00000184182	A	7.13738e-10	-0.266324	3.56869e-06	A	-	2	238912120	UBE2F	1
2:238912478:A:G	eQTLcatalogue	Alasoo_2018_ge_macrophage_IFNg_Salmonella	ENSG00000184182	G	6.95123e-10	-0.26634	3.47562e-06	G	-	2	238912478	UBE2F	1
2:238922585:G:T	eQTLcatalogue	Alasoo_2018_ge_macrophage_IFNg_Salmonella	ENSG00000184182	G	5.44561e-10	-0.266049	2.72281e-06	G	-	2	238922585	UBE2F	1
2:238930632:A:G	eQTLcatalogue	Alasoo_2018_ge_macrophage_IFNg_Salmonella	ENSG00000184182	A	4.23435e-10	-0.266102	2.11718e-06	A	-	2	238930632	UBE2F	1
2:238932389:A:G	eQTLcatalogue	Alasoo_2018_ge_macrophage_IFNg_Salmonella	ENSG00000184182	G	4.3327e-10	-0.264894	2.16635e-06	G	-	2	238932389	UBE2F	1
2:238939370:C:T	eQTLcatalogue	Alasoo_2018_ge_macrophage_IFNg_Salmonella	ENSG00000184182	C	3.80818e-10	-0.259522	1.90409e-06	C	-	2	238939370	UBE2F	1
10:70884514:A:G	eQTLcatalogue	Alasoo_2018_ge_macrophage_IFNg	ENSG00000156502	A	2.00237e-06	-0.0950582	0.0100119	G	+	10	70884514	SUPV3L1	1
10:70890541:C:T	eQTLcatalogue	Alasoo_2018_ge_macrophage_IFNg	ENSG00000156502	T	1.8424e-06	-0.0950766	0.009212	C	+	10	70890541	SUPV3L1	1
10:70902716:A:G	eQTLcatalogue	Alasoo_2018_ge_macrophage_IFNg	ENSG00000156502	G	1.95649e-06	-0.0980536	0.00978245	A	+	10	70902716	SUPV3L1	1
10:70903844:C:G	eQTLcatalogue	Alasoo_2018_ge_macrophage_IFNg	ENSG00000156502	C	1.25972e-06	-0.0962769	0.0062986	G	+	10	70903844	SUPV3L1	1
10:70944798:C:T	eQTLcatalogue	Alasoo_2018_ge_macrophage_IFNg	ENSG00000156502	T	1.89235e-06	-0.0950047	0.00946175	C	+	10	70944798	SUPV3L1	1
14:74480794:C:G	eQTLcatalogue	Alasoo_2018_ge_macrophage_IFNg	ENSG00000259065	G	2.55037e-09	1.25657	1.27519e-05	C	-	14	74480794	RP5-1021I20.1	1
14:74485133:C:T	eQTLcatalogue	Alasoo_2018_ge_macrophage_IFNg	ENSG00000259065	C	3.10918e-09	1.24843	1.55459e-05	T	-	14	74485133	RP5-1021I20.1	1
14:74480794:C:G	eQTLcatalogue	Alasoo_2018_ge_macrophage_naive	ENSG00000259065	G	1.07735e-11	1.11354	5.38675e-08	C	-	14	74480794	RP5-1021I20.1	1
14:74485133:C:T	eQTLcatalogue	Alasoo_2018_ge_macrophage_naive	ENSG00000259065	C	1.28615e-11	1.10806	6.43075e-08	T	-	14	74485133	RP5-1021I20.1	1
2:68385097:A:G	eQTLcatalogue	Alasoo_2018_ge_macrophage_Salmonella	ENSG00000221823	A	4.00954e-06	-0.103539	0.0200477	G	+	2	68385097	PPP3R1	1
2:68393144:A:T	eQTLcatalogue	Alasoo_2018_ge_macrophage_Salmonella	ENSG00000221823	T	5.72896e-06	-0.102756	0.0286448	A	+	2	68393144	PPP3R1	1
2:68394184:C:T	eQTLcatalogue	Alasoo_2018_ge_macrophage_Salmonella	ENSG00000221823	C	6.60551e-06	-0.102084	0.0330276	T	+	2	68394184	PPP3R1	1
2:68395631:A:G	eQTLcatalogue	Alasoo_2018_ge_macrophage_Salmonella	ENSG00000221823	G	6.25075e-06	-0.102492	0.0312538	A	+	2	68395631	PPP3R1	1
2:68398919:C:G	eQTLcatalogue	Alasoo_2018_ge_macrophage_Salmonella	ENSG00000221823	G	6.86067e-06	-0.102265	0.0343033	C	+	2	68398919	PPP3R1	1
2:68399190:C:T	eQTLcatalogue	Alasoo_2018_ge_macrophage_Salmonella	ENSG00000221823	C	6.88552e-06	-0.102223	0.0344276	T	+	2	68399190	PPP3R1	1
2:68402012:G:T	eQTLcatalogue	Alasoo_2018_ge_macrophage_Salmonella	ENSG00000221823	G	7.59873e-06	-0.10189	0.0379937	T	+	2	68402012	PPP3R1	1
2:68402830:C:G	eQTLcatalogue	Alasoo_2018_ge_macrophage_Salmonella	ENSG00000221823	G	7.83504e-06	-0.101738	0.0391752	C	+	2	68402830	PPP3R1	1
2:238877170:C:G	eQTLcatalogue	Alasoo_2018_ge_macrophage_Salmonella	ENSG00000184182	C	1.8766e-07	-0.189257	0.0009383	C	-	2	238877170	UBE2F	1
2:238877409:A:C	eQTLcatalogue	Alasoo_2018_ge_macrophage_Salmonella	ENSG00000184182	A	1.82006e-07	-0.189484	0.00091003	A	-	2	238877409	UBE2F	1
2:238893362:C:T	eQTLcatalogue	Alasoo_2018_ge_macrophage_Salmonella	ENSG00000184182	T	2.7254e-07	-0.183043	0.0013627	T	-	2	238893362	UBE2F	1
2:238895507:A:G	eQTLcatalogue	Alasoo_2018_ge_macrophage_Salmonella	ENSG00000184182	G	2.58528e-07	-0.183404	0.00129264	G	-	2	238895507	UBE2F	1
2:238907642:A:C	eQTLcatalogue	Alasoo_2018_ge_macrophage_Salmonella	ENSG00000184182	A	1.97206e-07	-0.184458	0.00098603	A	-	2	238907642	UBE2F	1
2:238909269:A:G	eQTLcatalogue	Alasoo_2018_ge_macrophage_Salmonella	ENSG00000184182	A	1.89837e-07	-0.184515	0.000949185	A	-	2	238909269	UBE2F	1
2:238910663:C:T	eQTLcatalogue	Alasoo_2018_ge_macrophage_Salmonella	ENSG00000184182	T	1.84507e-07	-0.184527	0.000922535	T	-	2	238910663	UBE2F	1
2:238912120:A:C	eQTLcatalogue	Alasoo_2018_ge_macrophage_Salmonella	ENSG00000184182	A	1.81762e-07	-0.18454	0.00090881	A	-	2	238912120	UBE2F	1
2:238912478:A:G	eQTLcatalogue	Alasoo_2018_ge_macrophage_Salmonella	ENSG00000184182	G	1.79512e-07	-0.184522	0.00089756	G	-	2	238912478	UBE2F	1
2:238922585:G:T	eQTLcatalogue	Alasoo_2018_ge_macrophage_Salmonella	ENSG00000184182	G	1.5698e-07	-0.184156	0.0007849	G	-	2	238922585	UBE2F	1
2:238930632:A:G	eQTLcatalogue	Alasoo_2018_ge_macrophage_Salmonella	ENSG00000184182	A	1.38278e-07	-0.183969	0.00069139	A	-	2	238930632	UBE2F	1
2:238932389:A:G	eQTLcatalogue	Alasoo_2018_ge_macrophage_Salmonella	ENSG00000184182	G	1.39406e-07	-0.183173	0.00069703	G	-	2	238932389	UBE2F	1
2:238939370:C:T	eQTLcatalogue	Alasoo_2018_ge_macrophage_Salmonella	ENSG00000184182	C	1.63531e-07	-0.178168	0.000817655	C	-	2	238939370	UBE2F	1
2:173297783:A:G	eQTLcatalogue	BLUEPRINT_ge_monocyte	ENSG00000091409	G	3.36294e-08	0.93313	0.000168147	G	+	2	173297783	ITGA6	1
2:173300939:A:G	eQTLcatalogue	BLUEPRINT_ge_monocyte	ENSG00000091409	G	1.82087e-07	0.830072	0.000910435	G	+	2	173300939	ITGA6	1
2:173302006:A:G	eQTLcatalogue	BLUEPRINT_ge_monocyte	ENSG00000091409	A	1.82442e-07	0.830029	0.00091221	A	+	2	173302006	ITGA6	1
2:173311553:A:G	eQTLcatalogue	BLUEPRINT_ge_monocyte	ENSG00000091409	A	1.82087e-07	0.830072	0.000910435	A	+	2	173311553	ITGA6	1
2:173313453:C:T	eQTLcatalogue	BLUEPRINT_ge_monocyte	ENSG00000091409	C	1.82087e-07	0.830072	0.000910435	C	+	2	173313453	ITGA6	1
2:173314713:A:T	eQTLcatalogue	BLUEPRINT_ge_monocyte	ENSG00000091409	A	1.82087e-07	0.830072	0.000910435	A	+	2	173314713	ITGA6	1
2:173319112:A:T	eQTLcatalogue	BLUEPRINT_ge_monocyte	ENSG00000091409	A	1.82087e-07	0.830072	0.000910435	A	+	2	173319112	ITGA6	1
2:173319930:C:T	eQTLcatalogue	BLUEPRINT_ge_monocyte	ENSG00000091409	C	1.82087e-07	0.830072	0.000910435	C	+	2	173319930	ITGA6	1
2:173321413:A:T	eQTLcatalogue	BLUEPRINT_ge_monocyte	ENSG00000091409	A	2.06997e-07	0.830471	0.00103498	A	+	2	173321413	ITGA6	1
2:173327823:C:T	eQTLcatalogue	BLUEPRINT_ge_monocyte	ENSG00000091409	C	7.03134e-08	0.843365	0.000351567	C	+	2	173327823	ITGA6	1
2:173342416:C:T	eQTLcatalogue	BLUEPRINT_ge_monocyte	ENSG00000091409	C	1.28457e-07	0.89591	0.000642285	C	+	2	173342416	ITGA6	1
2:173344128:A:G	eQTLcatalogue	BLUEPRINT_ge_monocyte	ENSG00000091409	G	1.28457e-07	0.89591	0.000642285	G	+	2	173344128	ITGA6	1
2:173352157:A:T	eQTLcatalogue	BLUEPRINT_ge_monocyte	ENSG00000091409	A	1.28457e-07	0.89591	0.000642285	A	+	2	173352157	ITGA6	1
2:173368358:G:T	eQTLcatalogue	BLUEPRINT_ge_monocyte	ENSG00000091409	T	1.28457e-07	0.89591	0.000642285	T	+	2	173368358	ITGA6	1
2:238877170:C:G	eQTLcatalogue	BLUEPRINT_ge_monocyte	ENSG00000184182	C	8.53675e-07	0.098246	0.00426838	C	+	2	238877170	UBE2F	1
2:238877409:A:C	eQTLcatalogue	BLUEPRINT_ge_monocyte	ENSG00000184182	A	8.53675e-07	0.098246	0.00426838	A	+	2	238877409	UBE2F	1
2:238893362:C:T	eQTLcatalogue	BLUEPRINT_ge_monocyte	ENSG00000184182	T	3.0367e-06	0.0927724	0.0151835	T	+	2	238893362	UBE2F	1
2:238907642:A:C	eQTLcatalogue	BLUEPRINT_ge_monocyte	ENSG00000184182	A	3.0367e-06	0.0927724	0.0151835	A	+	2	238907642	UBE2F	1
2:238909269:A:G	eQTLcatalogue	BLUEPRINT_ge_monocyte	ENSG00000184182	A	3.03401e-06	0.092776	0.01517	A	+	2	238909269	UBE2F	1
2:238912120:A:C	eQTLcatalogue	BLUEPRINT_ge_monocyte	ENSG00000184182	A	3.03513e-06	0.0927742	0.0151756	A	+	2	238912120	UBE2F	1
2:238912478:A:G	eQTLcatalogue	BLUEPRINT_ge_monocyte	ENSG00000184182	G	3.03695e-06	0.0927724	0.0151847	G	+	2	238912478	UBE2F	1
2:238922585:G:T	eQTLcatalogue	BLUEPRINT_ge_monocyte	ENSG00000184182	G	3.05544e-06	0.0927613	0.0152772	G	+	2	238922585	UBE2F	1
2:238930632:A:G	eQTLcatalogue	BLUEPRINT_ge_monocyte	ENSG00000184182	A	3.03347e-06	0.09278	0.0151673	A	+	2	238930632	UBE2F	1
2:238932389:A:G	eQTLcatalogue	BLUEPRINT_ge_monocyte	ENSG00000184182	G	3.03827e-06	0.0927716	0.0151913	G	+	2	238932389	UBE2F	1
5:405576:A:G	eQTLcatalogue	BLUEPRINT_ge_monocyte	ENSG00000180104	G	6.67916e-14	-0.141118	3.33958e-10	A	+	5	405576	EXOC3	1
5:408529:C:T	eQTLcatalogue	BLUEPRINT_ge_monocyte	ENSG00000180104	C	1.02415e-14	-0.144977	5.12075e-11	T	+	5	408529	EXOC3	1
5:410943:A:G	eQTLcatalogue	BLUEPRINT_ge_monocyte	ENSG00000180104	A	9.65707e-15	-0.145173	4.82853e-11	G	+	5	410943	EXOC3	1
5:411361:A:G	eQTLcatalogue	BLUEPRINT_ge_monocyte	ENSG00000180104	G	1.02415e-14	-0.144977	5.12075e-11	A	+	5	411361	EXOC3	1
5:412112:C:T	eQTLcatalogue	BLUEPRINT_ge_monocyte	ENSG00000180104	C	9.58483e-15	-0.145207	4.79241e-11	T	+	5	412112	EXOC3	1
5:413591:A:G	eQTLcatalogue	BLUEPRINT_ge_monocyte	ENSG00000180104	G	2.11528e-13	-0.135025	1.05764e-09	A	+	5	413591	EXOC3	1
5:416118:A:G	eQTLcatalogue	BLUEPRINT_ge_monocyte	ENSG00000180104	G	6.15666e-17	-0.160092	3.07833e-13	A	+	5	416118	EXOC3	1
5:416672:A:G	eQTLcatalogue	BLUEPRINT_ge_monocyte	ENSG00000180104	G	6.11295e-17	-0.160082	3.05647e-13	A	+	5	416672	EXOC3	1
5:418093:A:G	eQTLcatalogue	BLUEPRINT_ge_monocyte	ENSG00000225138	A	4.05561e-11	-0.820289	2.0278e-07	G	+	5	418093	CTD-2228K2.7	1
5:418494:A:G	eQTLcatalogue	BLUEPRINT_ge_monocyte	ENSG00000180104	A	4.27659e-17	-0.161154	2.13829e-13	G	+	5	418494	EXOC3	1
5:421403:A:G	eQTLcatalogue	BLUEPRINT_ge_monocyte	ENSG00000180104	G	4.20095e-17	-0.161271	2.10047e-13	A	+	5	421403	EXOC3	1
5:421426:A:C	eQTLcatalogue	BLUEPRINT_ge_monocyte	ENSG00000225138	A	2.41193e-10	-0.771432	1.20597e-06	C	+	5	421426	CTD-2228K2.7	1
5:421455:G:T	eQTLcatalogue	BLUEPRINT_ge_monocyte	ENSG00000180104	G	4.29645e-17	-0.161144	2.14823e-13	T	+	5	421455	EXOC3	1
5:422178:A:G	eQTLcatalogue	BLUEPRINT_ge_monocyte	ENSG00000180104	G	1.70803e-25	-0.185309	8.54015e-22	A	+	5	422178	EXOC3	1
5:423169:C:T	eQTLcatalogue	BLUEPRINT_ge_monocyte	ENSG00000180104	C	1.86481e-25	-0.184731	9.32405e-22	T	+	5	423169	EXOC3	1
5:423595:C:T	eQTLcatalogue	BLUEPRINT_ge_monocyte	ENSG00000180104	C	1.97679e-25	-0.184675	9.88395e-22	T	+	5	423595	EXOC3	1
5:423906:A:G	eQTLcatalogue	BLUEPRINT_ge_monocyte	ENSG00000180104	G	1.90677e-25	-0.184751	9.53385e-22	A	+	5	423906	EXOC3	1
5:428236:A:C	eQTLcatalogue	BLUEPRINT_ge_monocyte	ENSG00000180104	C	9.84266e-26	-0.184036	4.92133e-22	A	+	5	428236	EXOC3	1
5:429124:C:G	eQTLcatalogue	BLUEPRINT_ge_monocyte	ENSG00000180104	C	9.82695e-26	-0.184027	4.91348e-22	G	+	5	429124	EXOC3	1
5:429818:C:G	eQTLcatalogue	BLUEPRINT_ge_monocyte	ENSG00000180104	C	1.03193e-25	-0.184057	5.15965e-22	G	+	5	429818	EXOC3	1
5:430059:A:G	eQTLcatalogue	BLUEPRINT_ge_monocyte	ENSG00000180104	G	8.93668e-26	-0.184448	4.46834e-22	A	+	5	430059	EXOC3	1
5:434722:C:G	eQTLcatalogue	BLUEPRINT_ge_monocyte	ENSG00000180104	G	6.12948e-26	-0.185316	3.06474e-22	C	+	5	434722	EXOC3	1
5:436981:A:G	eQTLcatalogue	BLUEPRINT_ge_monocyte	ENSG00000180104	A	5.25272e-19	-0.154821	2.62636e-15	G	+	5	436981	EXOC3	1
5:437542:C:T	eQTLcatalogue	BLUEPRINT_ge_monocyte	ENSG00000180104	T	1.00773e-25	-0.184001	5.03865e-22	C	+	5	437542	EXOC3	1
5:437586:A:G	eQTLcatalogue	BLUEPRINT_ge_monocyte	ENSG00000180104	G	1.00827e-25	-0.183999	5.04135e-22	A	+	5	437586	EXOC3	1
5:437667:A:G	eQTLcatalogue	BLUEPRINT_ge_monocyte	ENSG00000180104	G	9.94457e-26	-0.184012	4.97228e-22	A	+	5	437667	EXOC3	1
5:437862:C:G	eQTLcatalogue	BLUEPRINT_ge_monocyte	ENSG00000180104	G	1.00514e-25	-0.184031	5.0257e-22	C	+	5	437862	EXOC3	1
10:70733935:C:T	eQTLcatalogue	BLUEPRINT_ge_monocyte	ENSG00000122958	C	1.21667e-07	0.183203	0.000608335	T	-	10	70733935	VPS26A	1
10:70736879:A:C	eQTLcatalogue	BLUEPRINT_ge_monocyte	ENSG00000122958	A	1.63129e-07	0.176052	0.000815645	C	-	10	70736879	VPS26A	1
10:70737972:C:T	eQTLcatalogue	BLUEPRINT_ge_monocyte	ENSG00000122958	T	1.63129e-07	0.176052	0.000815645	C	-	10	70737972	VPS26A	1
10:70740091:A:G	eQTLcatalogue	BLUEPRINT_ge_monocyte	ENSG00000122958	G	1.63129e-07	0.176052	0.000815645	A	-	10	70740091	VPS26A	1
10:70884514:A:G	eQTLcatalogue	BLUEPRINT_ge_monocyte	ENSG00000122958	A	1.021e-26	0.245548	5.105e-23	G	-	10	70884514	VPS26A	1
10:70890541:C:T	eQTLcatalogue	BLUEPRINT_ge_monocyte	ENSG00000122958	T	3.88139e-26	0.24412	1.94069e-22	C	-	10	70890541	VPS26A	1
10:70902716:A:G	eQTLcatalogue	BLUEPRINT_ge_monocyte	ENSG00000122958	G	2.59179e-20	0.226844	1.29589e-16	A	-	10	70902716	VPS26A	1
10:70903844:C:G	eQTLcatalogue	BLUEPRINT_ge_monocyte	ENSG00000122958	C	1.63016e-23	0.237375	8.1508e-20	G	-	10	70903844	VPS26A	1
10:70944798:C:T	eQTLcatalogue	BLUEPRINT_ge_monocyte	ENSG00000122958	T	1.2972e-22	0.23365	6.486e-19	C	-	10	70944798	VPS26A	1
11:457879:C:T	eQTLcatalogue	BLUEPRINT_ge_monocyte	ENSG00000023191	C	2.12827e-07	-0.1051	0.00106413	C	-	11	457879	RNH1	1
11:458595:A:G	eQTLcatalogue	BLUEPRINT_ge_monocyte	ENSG00000023191	G	3.67155e-07	-0.107213	0.00183577	G	-	11	458595	RNH1	1
11:460765:A:G	eQTLcatalogue	BLUEPRINT_ge_monocyte	ENSG00000023191	A	2.32291e-07	-0.104626	0.00116146	A	-	11	460765	RNH1	1
11:462684:C:T	eQTLcatalogue	BLUEPRINT_ge_monocyte	ENSG00000023191	C	3.67155e-07	-0.107213	0.00183577	C	-	11	462684	RNH1	1
11:462855:A:G	eQTLcatalogue	BLUEPRINT_ge_monocyte	ENSG00000023191	G	2.32291e-07	-0.104626	0.00116146	G	-	11	462855	RNH1	1
11:467368:A:G	eQTLcatalogue	BLUEPRINT_ge_monocyte	ENSG00000023191	A	2.32291e-07	-0.104626	0.00116146	A	-	11	467368	RNH1	1
11:473300:G:T	eQTLcatalogue	BLUEPRINT_ge_monocyte	ENSG00000023191	G	2.34022e-07	-0.10463	0.00117011	G	-	11	473300	RNH1	1
11:477623:C:T	eQTLcatalogue	BLUEPRINT_ge_monocyte	ENSG00000023191	C	2.321e-07	-0.104631	0.0011605	C	-	11	477623	RNH1	1
11:484469:C:T	eQTLcatalogue	BLUEPRINT_ge_monocyte	ENSG00000023191	C	2.32291e-07	-0.104626	0.00116146	C	-	11	484469	RNH1	1
11:486414:A:G	eQTLcatalogue	BLUEPRINT_ge_monocyte	ENSG00000023191	G	2.31801e-07	-0.104647	0.00115901	G	-	11	486414	RNH1	1
11:487101:C:T	eQTLcatalogue	BLUEPRINT_ge_monocyte	ENSG00000023191	C	2.32493e-07	-0.104625	0.00116247	C	-	11	487101	RNH1	1
11:487136:A:G	eQTLcatalogue	BLUEPRINT_ge_monocyte	ENSG00000023191	G	6.63645e-07	-0.104334	0.00331823	G	-	11	487136	RNH1	1
11:487201:C:T	eQTLcatalogue	BLUEPRINT_ge_monocyte	ENSG00000023191	T	2.32292e-07	-0.104627	0.00116146	T	-	11	487201	RNH1	1
11:491334:A:C	eQTLcatalogue	BLUEPRINT_ge_monocyte	ENSG00000023191	A	4.9027e-07	-0.104912	0.00245135	A	-	11	491334	RNH1	1
11:494662:A:G	eQTLcatalogue	BLUEPRINT_ge_monocyte	ENSG00000023191	G	2.84905e-07	-0.103916	0.00142453	G	-	11	494662	RNH1	1
11:495699:A:C	eQTLcatalogue	BLUEPRINT_ge_monocyte	ENSG00000023191	A	2.8462e-07	-0.103908	0.0014231	A	-	11	495699	RNH1	1
11:495892:C:G	eQTLcatalogue	BLUEPRINT_ge_monocyte	ENSG00000023191	C	2.8462e-07	-0.103908	0.0014231	C	-	11	495892	RNH1	1
11:496193:G:T	eQTLcatalogue	BLUEPRINT_ge_monocyte	ENSG00000023191	T	3.29441e-07	-0.102866	0.0016472	T	-	11	496193	RNH1	1
11:501468:A:G	eQTLcatalogue	BLUEPRINT_ge_monocyte	ENSG00000023191	G	2.83661e-07	-0.103927	0.00141831	G	-	11	501468	RNH1	1
11:502371:A:G	eQTLcatalogue	BLUEPRINT_ge_monocyte	ENSG00000023191	G	2.8462e-07	-0.103908	0.0014231	G	-	11	502371	RNH1	1
11:503710:C:T	eQTLcatalogue	BLUEPRINT_ge_monocyte	ENSG00000023191	C	2.8462e-07	-0.103908	0.0014231	C	-	11	503710	RNH1	1
11:504411:C:G	eQTLcatalogue	BLUEPRINT_ge_monocyte	ENSG00000023191	C	2.8462e-07	-0.103908	0.0014231	C	-	11	504411	RNH1	1
11:506229:C:T	eQTLcatalogue	BLUEPRINT_ge_monocyte	ENSG00000023191	C	4.89329e-07	-0.10486	0.00244664	C	-	11	506229	RNH1	1
11:506442:G:T	eQTLcatalogue	BLUEPRINT_ge_monocyte	ENSG00000023191	G	3.27354e-07	-0.104832	0.00163677	G	-	11	506442	RNH1	1
11:506596:C:T	eQTLcatalogue	BLUEPRINT_ge_monocyte	ENSG00000023191	C	4.89329e-07	-0.10486	0.00244664	C	-	11	506596	RNH1	1
12:104331157:C:T	eQTLcatalogue	BLUEPRINT_ge_monocyte	ENSG00000139372	C	9.94493e-07	0.117339	0.00497246	C	+	12	104331157	TDG	1
12:104333828:C:T	eQTLcatalogue	BLUEPRINT_ge_monocyte	ENSG00000139372	C	9.85641e-07	0.117347	0.0049282	C	+	12	104333828	TDG	1
12:104334303:C:T	eQTLcatalogue	BLUEPRINT_ge_monocyte	ENSG00000139372	T	9.85641e-07	0.117347	0.0049282	T	+	12	104334303	TDG	1
12:104337667:A:G	eQTLcatalogue	BLUEPRINT_ge_monocyte	ENSG00000139372	G	9.85641e-07	0.117347	0.0049282	G	+	12	104337667	TDG	1
14:74485133:C:T	eQTLcatalogue	BLUEPRINT_ge_monocyte	ENSG00000119723	C	9.93686e-13	-0.198386	4.96843e-09	T	+	14	74485133	COQ6	1
14:74485133:C:T	eQTLcatalogue	BLUEPRINT_ge_monocyte	ENSG00000140043	C	7.13177e-07	-0.257897	0.00356588	T	+	14	74485133	PTGR2	1
14:74485133:C:T	eQTLcatalogue	BLUEPRINT_ge_monocyte	ENSG00000259065	C	9.75003e-29	1.54722	4.87501e-25	T	-	14	74485133	RP5-1021I20.1	1
2:68385097:A:G	eQTLcatalogue	BLUEPRINT_ge_neutrophil	ENSG00000273064	A	3.08524e-16	0.332325	1.54262e-12	G	-	2	68385097	RP11-474G23.3	1
2:68393144:A:T	eQTLcatalogue	BLUEPRINT_ge_neutrophil	ENSG00000273064	T	5.67688e-18	0.348975	2.83844e-14	A	-	2	68393144	RP11-474G23.3	1
2:68394184:C:T	eQTLcatalogue	BLUEPRINT_ge_neutrophil	ENSG00000273064	C	5.64008e-18	0.348982	2.82004e-14	T	-	2	68394184	RP11-474G23.3	1
2:68395631:A:G	eQTLcatalogue	BLUEPRINT_ge_neutrophil	ENSG00000273064	G	5.63097e-18	0.348989	2.81548e-14	A	-	2	68395631	RP11-474G23.3	1
2:68398919:C:G	eQTLcatalogue	BLUEPRINT_ge_neutrophil	ENSG00000273064	G	5.61748e-18	0.349057	2.80874e-14	C	-	2	68398919	RP11-474G23.3	1
2:68399190:C:T	eQTLcatalogue	BLUEPRINT_ge_neutrophil	ENSG00000273064	C	5.64008e-18	0.348982	2.82004e-14	T	-	2	68399190	RP11-474G23.3	1
2:68402012:G:T	eQTLcatalogue	BLUEPRINT_ge_neutrophil	ENSG00000273064	G	5.65009e-18	0.348984	2.82505e-14	T	-	2	68402012	RP11-474G23.3	1
2:68410372:A:C	eQTLcatalogue	BLUEPRINT_ge_neutrophil	ENSG00000273064	C	5.64318e-18	0.348981	2.82159e-14	A	-	2	68410372	RP11-474G23.3	1
2:68410660:G:T	eQTLcatalogue	BLUEPRINT_ge_neutrophil	ENSG00000273064	T	5.6402e-18	0.348987	2.8201e-14	G	-	2	68410660	RP11-474G23.3	1
2:68411414:A:G	eQTLcatalogue	BLUEPRINT_ge_neutrophil	ENSG00000273064	G	5.64008e-18	0.348982	2.82004e-14	A	-	2	68411414	RP11-474G23.3	1
2:68418868:A:T	eQTLcatalogue	BLUEPRINT_ge_neutrophil	ENSG00000273064	A	5.64008e-18	0.348982	2.82004e-14	T	-	2	68418868	RP11-474G23.3	1
2:68419487:A:G	eQTLcatalogue	BLUEPRINT_ge_neutrophil	ENSG00000273064	G	5.64008e-18	0.348982	2.82004e-14	A	-	2	68419487	RP11-474G23.3	1
2:68420070:G:T	eQTLcatalogue	BLUEPRINT_ge_neutrophil	ENSG00000273064	G	5.64008e-18	0.348982	2.82004e-14	T	-	2	68420070	RP11-474G23.3	1
2:68421049:A:G	eQTLcatalogue	BLUEPRINT_ge_neutrophil	ENSG00000273064	G	5.64389e-18	0.348978	2.82195e-14	A	-	2	68421049	RP11-474G23.3	1
2:68422771:A:G	eQTLcatalogue	BLUEPRINT_ge_neutrophil	ENSG00000273064	G	5.64647e-18	0.348975	2.82324e-14	A	-	2	68422771	RP11-474G23.3	1
2:68423530:A:G	eQTLcatalogue	BLUEPRINT_ge_neutrophil	ENSG00000273064	G	3.17795e-18	0.350667	1.58897e-14	A	-	2	68423530	RP11-474G23.3	1
2:68430925:C:T	eQTLcatalogue	BLUEPRINT_ge_neutrophil	ENSG00000273064	C	2.14812e-18	0.355866	1.07406e-14	T	-	2	68430925	RP11-474G23.3	1
2:68433831:A:G	eQTLcatalogue	BLUEPRINT_ge_neutrophil	ENSG00000273064	G	5.2721e-18	0.349481	2.63605e-14	A	-	2	68433831	RP11-474G23.3	1
2:68435431:C:G	eQTLcatalogue	BLUEPRINT_ge_neutrophil	ENSG00000273064	C	5.64008e-18	0.348982	2.82004e-14	G	-	2	68435431	RP11-474G23.3	1
2:68438614:C:T	eQTLcatalogue	BLUEPRINT_ge_neutrophil	ENSG00000273064	C	2.14981e-18	0.355861	1.07491e-14	T	-	2	68438614	RP11-474G23.3	1
2:68439960:C:T	eQTLcatalogue	BLUEPRINT_ge_neutrophil	ENSG00000273064	C	2.14981e-18	0.355861	1.07491e-14	T	-	2	68439960	RP11-474G23.3	1
2:68443651:A:G	eQTLcatalogue	BLUEPRINT_ge_neutrophil	ENSG00000273064	A	2.30554e-18	0.355609	1.15277e-14	G	-	2	68443651	RP11-474G23.3	1
2:68446936:C:T	eQTLcatalogue	BLUEPRINT_ge_neutrophil	ENSG00000273064	C	2.14981e-18	0.355861	1.07491e-14	T	-	2	68446936	RP11-474G23.3	1
2:68457573:C:T	eQTLcatalogue	BLUEPRINT_ge_neutrophil	ENSG00000273064	C	6.18404e-19	0.35863	3.09202e-15	T	-	2	68457573	RP11-474G23.3	1
2:68457854:A:G	eQTLcatalogue	BLUEPRINT_ge_neutrophil	ENSG00000273064	A	6.18404e-19	0.35863	3.09202e-15	G	-	2	68457854	RP11-474G23.3	1
2:68463612:A:G	eQTLcatalogue	BLUEPRINT_ge_neutrophil	ENSG00000273064	G	6.18404e-19	0.35863	3.09202e-15	A	-	2	68463612	RP11-474G23.3	1
2:68467910:A:C	eQTLcatalogue	BLUEPRINT_ge_neutrophil	ENSG00000273064	A	6.19121e-19	0.358652	3.0956e-15	C	-	2	68467910	RP11-474G23.3	1
2:68475595:A:C	eQTLcatalogue	BLUEPRINT_ge_neutrophil	ENSG00000273064	C	6.18404e-19	0.35863	3.09202e-15	A	-	2	68475595	RP11-474G23.3	1
2:68477248:C:T	eQTLcatalogue	BLUEPRINT_ge_neutrophil	ENSG00000273064	T	9.51832e-19	0.357083	4.75916e-15	C	-	2	68477248	RP11-474G23.3	1
2:173297783:A:G	eQTLcatalogue	BLUEPRINT_ge_neutrophil	ENSG00000091409	G	1.78745e-08	0.646275	8.93725e-05	G	+	2	173297783	ITGA6	1
2:173300939:A:G	eQTLcatalogue	BLUEPRINT_ge_neutrophil	ENSG00000091409	G	6.75178e-11	0.692476	3.37589e-07	G	+	2	173300939	ITGA6	1
2:173302006:A:G	eQTLcatalogue	BLUEPRINT_ge_neutrophil	ENSG00000091409	A	6.73255e-11	0.692525	3.36628e-07	A	+	2	173302006	ITGA6	1
2:173311553:A:G	eQTLcatalogue	BLUEPRINT_ge_neutrophil	ENSG00000091409	A	6.75178e-11	0.692476	3.37589e-07	A	+	2	173311553	ITGA6	1
2:173313453:C:T	eQTLcatalogue	BLUEPRINT_ge_neutrophil	ENSG00000091409	C	6.75178e-11	0.692476	3.37589e-07	C	+	2	173313453	ITGA6	1
2:173314713:A:T	eQTLcatalogue	BLUEPRINT_ge_neutrophil	ENSG00000091409	A	6.75178e-11	0.692476	3.37589e-07	A	+	2	173314713	ITGA6	1
2:173319112:A:T	eQTLcatalogue	BLUEPRINT_ge_neutrophil	ENSG00000091409	A	6.75178e-11	0.692476	3.37589e-07	A	+	2	173319112	ITGA6	1
2:173319930:C:T	eQTLcatalogue	BLUEPRINT_ge_neutrophil	ENSG00000091409	C	6.75178e-11	0.692476	3.37589e-07	C	+	2	173319930	ITGA6	1
2:173321413:A:T	eQTLcatalogue	BLUEPRINT_ge_neutrophil	ENSG00000091409	A	5.87711e-11	0.697741	2.93855e-07	A	+	2	173321413	ITGA6	1
2:173327823:C:T	eQTLcatalogue	BLUEPRINT_ge_neutrophil	ENSG00000091409	C	1.06006e-10	0.676104	5.3003e-07	C	+	2	173327823	ITGA6	1
2:173342416:C:T	eQTLcatalogue	BLUEPRINT_ge_neutrophil	ENSG00000091409	C	1.42959e-08	0.650666	7.14795e-05	C	+	2	173342416	ITGA6	1
2:173344128:A:G	eQTLcatalogue	BLUEPRINT_ge_neutrophil	ENSG00000091409	G	1.42959e-08	0.650666	7.14795e-05	G	+	2	173344128	ITGA6	1
2:173352157:A:T	eQTLcatalogue	BLUEPRINT_ge_neutrophil	ENSG00000091409	A	1.42959e-08	0.650666	7.14795e-05	A	+	2	173352157	ITGA6	1
2:173368358:G:T	eQTLcatalogue	BLUEPRINT_ge_neutrophil	ENSG00000091409	T	1.42959e-08	0.650666	7.14795e-05	T	+	2	173368358	ITGA6	1
2:238877170:C:G	eQTLcatalogue	BLUEPRINT_ge_neutrophil	ENSG00000184182	C	6.69223e-35	0.422119	3.34611e-31	C	+	2	238877170	UBE2F	1
2:238877409:A:C	eQTLcatalogue	BLUEPRINT_ge_neutrophil	ENSG00000184182	A	6.69223e-35	0.422119	3.34611e-31	A	+	2	238877409	UBE2F	1
2:238893362:C:T	eQTLcatalogue	BLUEPRINT_ge_neutrophil	ENSG00000184182	T	3.67527e-35	0.420089	1.83763e-31	T	+	2	238893362	UBE2F	1
2:238907642:A:C	eQTLcatalogue	BLUEPRINT_ge_neutrophil	ENSG00000184182	A	3.67527e-35	0.420089	1.83763e-31	A	+	2	238907642	UBE2F	1
2:238909269:A:G	eQTLcatalogue	BLUEPRINT_ge_neutrophil	ENSG00000184182	A	3.6678e-35	0.420093	1.8339e-31	A	+	2	238909269	UBE2F	1
2:238912120:A:C	eQTLcatalogue	BLUEPRINT_ge_neutrophil	ENSG00000184182	A	3.68365e-35	0.420084	1.84182e-31	A	+	2	238912120	UBE2F	1
2:238912478:A:G	eQTLcatalogue	BLUEPRINT_ge_neutrophil	ENSG00000184182	G	3.68226e-35	0.420087	1.84113e-31	G	+	2	238912478	UBE2F	1
2:238922585:G:T	eQTLcatalogue	BLUEPRINT_ge_neutrophil	ENSG00000184182	G	3.67776e-35	0.420144	1.83888e-31	G	+	2	238922585	UBE2F	1
2:238930632:A:G	eQTLcatalogue	BLUEPRINT_ge_neutrophil	ENSG00000184182	A	3.68162e-35	0.420101	1.84081e-31	A	+	2	238930632	UBE2F	1
2:238932389:A:G	eQTLcatalogue	BLUEPRINT_ge_neutrophil	ENSG00000184182	G	3.64152e-35	0.420115	1.82076e-31	G	+	2	238932389	UBE2F	1
2:238939370:C:T	eQTLcatalogue	BLUEPRINT_ge_neutrophil	ENSG00000184182	C	2.95116e-29	0.388421	1.47558e-25	C	+	2	238939370	UBE2F	1
3:20129611:C:G	eQTLcatalogue	BLUEPRINT_ge_neutrophil	ENSG00000261734	C	1.36971e-06	0.440034	0.00684855	C	+	3	20129611	RP11-669C19.1	1
3:20132259:C:G	eQTLcatalogue	BLUEPRINT_ge_neutrophil	ENSG00000261734	C	1.36971e-06	0.440034	0.00684855	C	+	3	20132259	RP11-669C19.1	1
3:20136029:C:G	eQTLcatalogue	BLUEPRINT_ge_neutrophil	ENSG00000261734	G	1.36971e-06	0.440034	0.00684855	G	+	3	20136029	RP11-669C19.1	1
3:20138732:A:G	eQTLcatalogue	BLUEPRINT_ge_neutrophil	ENSG00000261734	G	3.75942e-06	0.424298	0.0187971	G	+	3	20138732	RP11-669C19.1	1
3:20139967:C:G	eQTLcatalogue	BLUEPRINT_ge_neutrophil	ENSG00000261734	G	1.36971e-06	0.440034	0.00684855	G	+	3	20139967	RP11-669C19.1	1
3:20141356:C:T	eQTLcatalogue	BLUEPRINT_ge_neutrophil	ENSG00000261734	C	1.36971e-06	0.440034	0.00684855	C	+	3	20141356	RP11-669C19.1	1
3:20167830:A:G	eQTLcatalogue	BLUEPRINT_ge_neutrophil	ENSG00000261734	A	4.74728e-07	0.44841	0.00237364	A	+	3	20167830	RP11-669C19.1	1
3:20168875:C:G	eQTLcatalogue	BLUEPRINT_ge_neutrophil	ENSG00000261734	C	4.73356e-07	0.448508	0.00236678	C	+	3	20168875	RP11-669C19.1	1
3:20174369:A:G	eQTLcatalogue	BLUEPRINT_ge_neutrophil	ENSG00000261734	A	4.74504e-07	0.448413	0.00237252	A	+	3	20174369	RP11-669C19.1	1
5:405576:A:G	eQTLcatalogue	BLUEPRINT_ge_neutrophil	ENSG00000180104	G	2.18549e-28	-0.243943	1.09274e-24	A	+	5	405576	EXOC3	1
5:408529:C:T	eQTLcatalogue	BLUEPRINT_ge_neutrophil	ENSG00000180104	C	1.0181e-29	-0.248154	5.0905e-26	T	+	5	408529	EXOC3	1
5:410943:A:G	eQTLcatalogue	BLUEPRINT_ge_neutrophil	ENSG00000180104	A	1.06817e-29	-0.248216	5.34085e-26	G	+	5	410943	EXOC3	1
5:411361:A:G	eQTLcatalogue	BLUEPRINT_ge_neutrophil	ENSG00000180104	G	1.0181e-29	-0.248154	5.0905e-26	A	+	5	411361	EXOC3	1
5:412112:C:T	eQTLcatalogue	BLUEPRINT_ge_neutrophil	ENSG00000180104	C	9.41906e-30	-0.248418	4.70953e-26	T	+	5	412112	EXOC3	1
5:413591:A:G	eQTLcatalogue	BLUEPRINT_ge_neutrophil	ENSG00000180104	G	5.10872e-27	-0.233311	2.55436e-23	A	+	5	413591	EXOC3	1
5:416118:A:G	eQTLcatalogue	BLUEPRINT_ge_neutrophil	ENSG00000180104	G	2.53212e-38	-0.280352	1.26606e-34	A	+	5	416118	EXOC3	1
5:416672:A:G	eQTLcatalogue	BLUEPRINT_ge_neutrophil	ENSG00000180104	G	2.5555e-38	-0.280303	1.27775e-34	A	+	5	416672	EXOC3	1
5:418093:A:G	eQTLcatalogue	BLUEPRINT_ge_neutrophil	ENSG00000180104	A	1.23199e-11	-0.217961	6.15995e-08	G	+	5	418093	EXOC3	1
5:418494:A:G	eQTLcatalogue	BLUEPRINT_ge_neutrophil	ENSG00000180104	A	1.87484e-38	-0.281303	9.3742e-35	G	+	5	418494	EXOC3	1
5:421403:A:G	eQTLcatalogue	BLUEPRINT_ge_neutrophil	ENSG00000180104	G	1.97786e-38	-0.281396	9.8893e-35	A	+	5	421403	EXOC3	1
5:421426:A:C	eQTLcatalogue	BLUEPRINT_ge_neutrophil	ENSG00000180104	A	2.71549e-12	-0.21885	1.35775e-08	C	+	5	421426	EXOC3	1
5:421455:G:T	eQTLcatalogue	BLUEPRINT_ge_neutrophil	ENSG00000180104	G	1.85956e-38	-0.281309	9.2978e-35	T	+	5	421455	EXOC3	1
5:422178:A:G	eQTLcatalogue	BLUEPRINT_ge_neutrophil	ENSG00000180104	G	3.94906e-55	-0.303521	1.97453e-51	A	+	5	422178	EXOC3	1
5:423169:C:T	eQTLcatalogue	BLUEPRINT_ge_neutrophil	ENSG00000180104	C	3.46713e-55	-0.302862	1.73356e-51	T	+	5	423169	EXOC3	1
5:423595:C:T	eQTLcatalogue	BLUEPRINT_ge_neutrophil	ENSG00000180104	C	3.29901e-55	-0.302915	1.6495e-51	T	+	5	423595	EXOC3	1
5:423906:A:G	eQTLcatalogue	BLUEPRINT_ge_neutrophil	ENSG00000180104	G	3.2525e-55	-0.302978	1.62625e-51	A	+	5	423906	EXOC3	1
5:428236:A:C	eQTLcatalogue	BLUEPRINT_ge_neutrophil	ENSG00000180104	C	3.34665e-56	-0.301914	1.67332e-52	A	+	5	428236	EXOC3	1
5:429124:C:G	eQTLcatalogue	BLUEPRINT_ge_neutrophil	ENSG00000180104	C	3.20908e-56	-0.301922	1.60454e-52	G	+	5	429124	EXOC3	1
5:429818:C:G	eQTLcatalogue	BLUEPRINT_ge_neutrophil	ENSG00000180104	C	3.35838e-56	-0.302035	1.67919e-52	G	+	5	429818	EXOC3	1
5:430059:A:G	eQTLcatalogue	BLUEPRINT_ge_neutrophil	ENSG00000180104	G	3.92458e-56	-0.302287	1.96229e-52	A	+	5	430059	EXOC3	1
5:434722:C:G	eQTLcatalogue	BLUEPRINT_ge_neutrophil	ENSG00000180104	G	1.63296e-55	-0.302052	8.1648e-52	C	+	5	434722	EXOC3	1
5:436981:A:G	eQTLcatalogue	BLUEPRINT_ge_neutrophil	ENSG00000180104	A	3.40474e-37	-0.257414	1.70237e-33	G	+	5	436981	EXOC3	1
5:437542:C:T	eQTLcatalogue	BLUEPRINT_ge_neutrophil	ENSG00000180104	T	3.40585e-56	-0.301894	1.70292e-52	C	+	5	437542	EXOC3	1
5:437586:A:G	eQTLcatalogue	BLUEPRINT_ge_neutrophil	ENSG00000180104	G	3.42011e-56	-0.30189	1.71005e-52	A	+	5	437586	EXOC3	1
5:437667:A:G	eQTLcatalogue	BLUEPRINT_ge_neutrophil	ENSG00000180104	G	3.41747e-56	-0.301884	1.70874e-52	A	+	5	437667	EXOC3	1
5:437862:C:G	eQTLcatalogue	BLUEPRINT_ge_neutrophil	ENSG00000180104	G	3.41135e-56	-0.301936	1.70568e-52	C	+	5	437862	EXOC3	1
10:121652694:A:T	eQTLcatalogue	BLUEPRINT_ge_neutrophil	ENSG00000197771	A	2.09831e-08	-0.194638	0.000104915	A	-	10	121652694	MCMBP	1
10:121656067:A:G	eQTLcatalogue	BLUEPRINT_ge_neutrophil	ENSG00000197771	G	2.05908e-08	-0.194585	0.000102954	G	-	10	121656067	MCMBP	1
10:121657558:A:G	eQTLcatalogue	BLUEPRINT_ge_neutrophil	ENSG00000197771	A	2.05693e-08	-0.194591	0.000102847	A	-	10	121657558	MCMBP	1
10:121659077:A:T	eQTLcatalogue	BLUEPRINT_ge_neutrophil	ENSG00000197771	T	2.05908e-08	-0.194585	0.000102954	T	-	10	121659077	MCMBP	1
10:121659612:G:T	eQTLcatalogue	BLUEPRINT_ge_neutrophil	ENSG00000197771	G	2.06075e-08	-0.194581	0.000103038	G	-	10	121659612	MCMBP	1
10:121659707:A:G	eQTLcatalogue	BLUEPRINT_ge_neutrophil	ENSG00000197771	A	2.10157e-08	-0.194657	0.000105079	A	-	10	121659707	MCMBP	1
10:121660326:C:T	eQTLcatalogue	BLUEPRINT_ge_neutrophil	ENSG00000197771	C	1.57611e-08	-0.199312	7.88055e-05	C	-	10	121660326	MCMBP	1
10:121660709:C:T	eQTLcatalogue	BLUEPRINT_ge_neutrophil	ENSG00000197771	C	1.89898e-08	-0.195269	9.4949e-05	C	-	10	121660709	MCMBP	1
10:121664714:A:G	eQTLcatalogue	BLUEPRINT_ge_neutrophil	ENSG00000197771	G	2.06615e-08	-0.19461	0.000103307	G	-	10	121664714	MCMBP	1
10:121668501:A:C	eQTLcatalogue	BLUEPRINT_ge_neutrophil	ENSG00000197771	C	2.05908e-08	-0.194585	0.000102954	C	-	10	121668501	MCMBP	1
10:121668656:G:T	eQTLcatalogue	BLUEPRINT_ge_neutrophil	ENSG00000197771	T	2.05908e-08	-0.194585	0.000102954	T	-	10	121668656	MCMBP	1
10:121669997:A:T	eQTLcatalogue	BLUEPRINT_ge_neutrophil	ENSG00000197771	T	2.05908e-08	-0.194585	0.000102954	T	-	10	121669997	MCMBP	1
10:121671651:C:T	eQTLcatalogue	BLUEPRINT_ge_neutrophil	ENSG00000197771	T	2.06025e-08	-0.194589	0.000103012	T	-	10	121671651	MCMBP	1
10:121672920:A:T	eQTLcatalogue	BLUEPRINT_ge_neutrophil	ENSG00000197771	T	2.05908e-08	-0.194585	0.000102954	T	-	10	121672920	MCMBP	1
10:121674000:A:G	eQTLcatalogue	BLUEPRINT_ge_neutrophil	ENSG00000197771	A	6.2746e-08	-0.197119	0.00031373	A	-	10	121674000	MCMBP	1
10:121674010:A:G	eQTLcatalogue	BLUEPRINT_ge_neutrophil	ENSG00000197771	A	6.08444e-08	-0.197205	0.000304222	A	-	10	121674010	MCMBP	1
10:121675880:C:T	eQTLcatalogue	BLUEPRINT_ge_neutrophil	ENSG00000197771	C	2.06116e-08	-0.195148	0.000103058	C	-	10	121675880	MCMBP	1
10:121680142:C:T	eQTLcatalogue	BLUEPRINT_ge_neutrophil	ENSG00000197771	C	2.05908e-08	-0.194585	0.000102954	C	-	10	121680142	MCMBP	1
10:121680359:A:G	eQTLcatalogue	BLUEPRINT_ge_neutrophil	ENSG00000197771	A	2.05908e-08	-0.194585	0.000102954	A	-	10	121680359	MCMBP	1
10:121681422:A:G	eQTLcatalogue	BLUEPRINT_ge_neutrophil	ENSG00000197771	A	2.05908e-08	-0.194585	0.000102954	A	-	10	121681422	MCMBP	1
10:121682441:C:T	eQTLcatalogue	BLUEPRINT_ge_neutrophil	ENSG00000197771	T	2.05908e-08	-0.194585	0.000102954	T	-	10	121682441	MCMBP	1
10:121685559:A:G	eQTLcatalogue	BLUEPRINT_ge_neutrophil	ENSG00000197771	G	2.05908e-08	-0.194585	0.000102954	G	-	10	121685559	MCMBP	1
10:121685895:A:G	eQTLcatalogue	BLUEPRINT_ge_neutrophil	ENSG00000197771	A	3.68119e-08	-0.185456	0.000184059	A	-	10	121685895	MCMBP	1
10:121686228:C:T	eQTLcatalogue	BLUEPRINT_ge_neutrophil	ENSG00000197771	T	2.06142e-08	-0.194593	0.000103071	T	-	10	121686228	MCMBP	1
10:121686714:A:G	eQTLcatalogue	BLUEPRINT_ge_neutrophil	ENSG00000197771	G	2.05908e-08	-0.194585	0.000102954	G	-	10	121686714	MCMBP	1
10:121687420:C:G	eQTLcatalogue	BLUEPRINT_ge_neutrophil	ENSG00000197771	G	2.05908e-08	-0.194585	0.000102954	G	-	10	121687420	MCMBP	1
10:121692152:A:C	eQTLcatalogue	BLUEPRINT_ge_neutrophil	ENSG00000197771	A	2.05908e-08	-0.194585	0.000102954	A	-	10	121692152	MCMBP	1
10:121692777:A:G	eQTLcatalogue	BLUEPRINT_ge_neutrophil	ENSG00000197771	A	2.05908e-08	-0.194585	0.000102954	A	-	10	121692777	MCMBP	1
10:121693020:A:G	eQTLcatalogue	BLUEPRINT_ge_neutrophil	ENSG00000197771	G	2.05908e-08	-0.194585	0.000102954	G	-	10	121693020	MCMBP	1
10:121693246:A:G	eQTLcatalogue	BLUEPRINT_ge_neutrophil	ENSG00000197771	A	2.05908e-08	-0.194585	0.000102954	A	-	10	121693246	MCMBP	1
10:121693664:A:G	eQTLcatalogue	BLUEPRINT_ge_neutrophil	ENSG00000197771	G	2.05908e-08	-0.194585	0.000102954	G	-	10	121693664	MCMBP	1
10:121694150:C:G	eQTLcatalogue	BLUEPRINT_ge_neutrophil	ENSG00000197771	C	2.05908e-08	-0.194585	0.000102954	C	-	10	121694150	MCMBP	1
10:121695024:A:G	eQTLcatalogue	BLUEPRINT_ge_neutrophil	ENSG00000197771	G	2.05908e-08	-0.194585	0.000102954	G	-	10	121695024	MCMBP	1
10:121695307:A:G	eQTLcatalogue	BLUEPRINT_ge_neutrophil	ENSG00000197771	A	2.05908e-08	-0.194585	0.000102954	A	-	10	121695307	MCMBP	1
10:121695460:G:T	eQTLcatalogue	BLUEPRINT_ge_neutrophil	ENSG00000197771	G	2.05908e-08	-0.194585	0.000102954	G	-	10	121695460	MCMBP	1
10:121699523:A:T	eQTLcatalogue	BLUEPRINT_ge_neutrophil	ENSG00000197771	A	2.05908e-08	-0.194585	0.000102954	A	-	10	121699523	MCMBP	1
10:121700136:A:G	eQTLcatalogue	BLUEPRINT_ge_neutrophil	ENSG00000197771	A	2.05908e-08	-0.194585	0.000102954	A	-	10	121700136	MCMBP	1
10:121700201:A:T	eQTLcatalogue	BLUEPRINT_ge_neutrophil	ENSG00000197771	T	2.05908e-08	-0.194585	0.000102954	T	-	10	121700201	MCMBP	1
10:121700959:C:T	eQTLcatalogue	BLUEPRINT_ge_neutrophil	ENSG00000197771	T	2.05908e-08	-0.194585	0.000102954	T	-	10	121700959	MCMBP	1
10:121701486:C:T	eQTLcatalogue	BLUEPRINT_ge_neutrophil	ENSG00000197771	C	2.05908e-08	-0.194585	0.000102954	C	-	10	121701486	MCMBP	1
10:121701786:G:T	eQTLcatalogue	BLUEPRINT_ge_neutrophil	ENSG00000197771	T	2.05903e-08	-0.194607	0.000102952	T	-	10	121701786	MCMBP	1
10:121702010:A:G	eQTLcatalogue	BLUEPRINT_ge_neutrophil	ENSG00000197771	A	2.05908e-08	-0.194585	0.000102954	A	-	10	121702010	MCMBP	1
14:74485133:C:T	eQTLcatalogue	BLUEPRINT_ge_neutrophil	ENSG00000156050	C	2.73312e-22	-0.399947	1.36656e-18	T	+	14	74485133	FAM161B	1
14:74485133:C:T	eQTLcatalogue	BLUEPRINT_ge_neutrophil	ENSG00000259065	C	1.5745e-15	0.917472	7.8725e-12	T	-	14	74485133	RP5-1021I20.1	1
2:68385097:A:G	eQTLcatalogue	BLUEPRINT_ge_T-cell	ENSG00000115946	A	5.8123e-06	-0.0542935	0.0290615	G	+	2	68385097	PNO1	1
2:238877170:C:G	eQTLcatalogue	BLUEPRINT_ge_T-cell	ENSG00000184182	C	9.7449e-17	0.183367	4.87245e-13	C	+	2	238877170	UBE2F	1
2:238877409:A:C	eQTLcatalogue	BLUEPRINT_ge_T-cell	ENSG00000184182	A	9.7449e-17	0.183367	4.87245e-13	A	+	2	238877409	UBE2F	1
2:238893362:C:T	eQTLcatalogue	BLUEPRINT_ge_T-cell	ENSG00000184182	T	9.7449e-17	0.183367	4.87245e-13	T	+	2	238893362	UBE2F	1
2:238907642:A:C	eQTLcatalogue	BLUEPRINT_ge_T-cell	ENSG00000184182	A	9.7449e-17	0.183367	4.87245e-13	A	+	2	238907642	UBE2F	1
2:238909269:A:G	eQTLcatalogue	BLUEPRINT_ge_T-cell	ENSG00000184182	A	9.7294e-17	0.183371	4.8647e-13	A	+	2	238909269	UBE2F	1
2:238912120:A:C	eQTLcatalogue	BLUEPRINT_ge_T-cell	ENSG00000184182	A	9.75288e-17	0.183365	4.87644e-13	A	+	2	238912120	UBE2F	1
2:238912478:A:G	eQTLcatalogue	BLUEPRINT_ge_T-cell	ENSG00000184182	G	9.7079e-17	0.183376	4.85395e-13	G	+	2	238912478	UBE2F	1
2:238922585:G:T	eQTLcatalogue	BLUEPRINT_ge_T-cell	ENSG00000184182	G	9.75137e-17	0.18337	4.87569e-13	G	+	2	238922585	UBE2F	1
2:238930632:A:G	eQTLcatalogue	BLUEPRINT_ge_T-cell	ENSG00000184182	A	9.75414e-17	0.183373	4.87707e-13	A	+	2	238930632	UBE2F	1
2:238932389:A:G	eQTLcatalogue	BLUEPRINT_ge_T-cell	ENSG00000184182	G	9.7449e-17	0.183367	4.87245e-13	G	+	2	238932389	UBE2F	1
2:238939370:C:T	eQTLcatalogue	BLUEPRINT_ge_T-cell	ENSG00000184182	C	9.89321e-15	0.170206	4.9466e-11	C	+	2	238939370	UBE2F	1
3:20129611:C:G	eQTLcatalogue	BLUEPRINT_ge_T-cell	ENSG00000231304	C	7.5081e-17	0.660172	3.75405e-13	C	+	3	20129611	AC107622.1	1
3:20129611:C:G	eQTLcatalogue	BLUEPRINT_ge_T-cell	ENSG00000261734	C	1.36574e-16	0.782791	6.8287e-13	C	+	3	20129611	RP11-669C19.1	1
3:20132259:C:G	eQTLcatalogue	BLUEPRINT_ge_T-cell	ENSG00000231304	C	7.5081e-17	0.660172	3.75405e-13	C	+	3	20132259	AC107622.1	1
3:20132259:C:G	eQTLcatalogue	BLUEPRINT_ge_T-cell	ENSG00000261734	C	1.36574e-16	0.782791	6.8287e-13	C	+	3	20132259	RP11-669C19.1	1
3:20136029:C:G	eQTLcatalogue	BLUEPRINT_ge_T-cell	ENSG00000231304	G	7.5081e-17	0.660172	3.75405e-13	G	+	3	20136029	AC107622.1	1
3:20136029:C:G	eQTLcatalogue	BLUEPRINT_ge_T-cell	ENSG00000261734	G	1.36574e-16	0.782791	6.8287e-13	G	+	3	20136029	RP11-669C19.1	1
3:20138732:A:G	eQTLcatalogue	BLUEPRINT_ge_T-cell	ENSG00000231304	G	7.83249e-17	0.660629	3.91625e-13	G	+	3	20138732	AC107622.1	1
3:20138732:A:G	eQTLcatalogue	BLUEPRINT_ge_T-cell	ENSG00000261734	G	1.40968e-16	0.783422	7.0484e-13	G	+	3	20138732	RP11-669C19.1	1
3:20139967:C:G	eQTLcatalogue	BLUEPRINT_ge_T-cell	ENSG00000231304	G	7.5081e-17	0.660172	3.75405e-13	G	+	3	20139967	AC107622.1	1
3:20139967:C:G	eQTLcatalogue	BLUEPRINT_ge_T-cell	ENSG00000261734	G	1.36574e-16	0.782791	6.8287e-13	G	+	3	20139967	RP11-669C19.1	1
3:20141356:C:T	eQTLcatalogue	BLUEPRINT_ge_T-cell	ENSG00000231304	C	7.5081e-17	0.660172	3.75405e-13	C	+	3	20141356	AC107622.1	1
3:20141356:C:T	eQTLcatalogue	BLUEPRINT_ge_T-cell	ENSG00000261734	C	1.36574e-16	0.782791	6.8287e-13	C	+	3	20141356	RP11-669C19.1	1
3:20167830:A:G	eQTLcatalogue	BLUEPRINT_ge_T-cell	ENSG00000231304	A	4.3867e-17	0.664198	2.19335e-13	A	+	3	20167830	AC107622.1	1
3:20167830:A:G	eQTLcatalogue	BLUEPRINT_ge_T-cell	ENSG00000261734	A	2.18821e-16	0.778485	1.0941e-12	A	+	3	20167830	RP11-669C19.1	1
3:20168875:C:G	eQTLcatalogue	BLUEPRINT_ge_T-cell	ENSG00000231304	C	4.36287e-17	0.664324	2.18143e-13	C	+	3	20168875	AC107622.1	1
3:20168875:C:G	eQTLcatalogue	BLUEPRINT_ge_T-cell	ENSG00000261734	C	2.17633e-16	0.778635	1.08816e-12	C	+	3	20168875	RP11-669C19.1	1
3:20174369:A:G	eQTLcatalogue	BLUEPRINT_ge_T-cell	ENSG00000231304	A	4.38722e-17	0.664189	2.19361e-13	A	+	3	20174369	AC107622.1	1
3:20174369:A:G	eQTLcatalogue	BLUEPRINT_ge_T-cell	ENSG00000261734	A	2.18819e-16	0.778475	1.0941e-12	A	+	3	20174369	RP11-669C19.1	1
5:405576:A:G	eQTLcatalogue	BLUEPRINT_ge_T-cell	ENSG00000225138	G	5.8601e-11	0.528481	2.93005e-07	A	-	5	405576	CTD-2228K2.7	1
5:408529:C:T	eQTLcatalogue	BLUEPRINT_ge_T-cell	ENSG00000221990	C	6.10281e-06	0.148537	0.030514	T	-	5	408529	C5orf55	1
5:408529:C:T	eQTLcatalogue	BLUEPRINT_ge_T-cell	ENSG00000225138	C	1.26899e-10	0.520132	6.34495e-07	T	-	5	408529	CTD-2228K2.7	1
5:410943:A:G	eQTLcatalogue	BLUEPRINT_ge_T-cell	ENSG00000221990	A	6.23556e-06	0.148487	0.0311778	G	-	5	410943	C5orf55	1
5:410943:A:G	eQTLcatalogue	BLUEPRINT_ge_T-cell	ENSG00000225138	A	1.20991e-10	0.520966	6.04955e-07	G	-	5	410943	CTD-2228K2.7	1
5:411361:A:G	eQTLcatalogue	BLUEPRINT_ge_T-cell	ENSG00000221990	G	6.10281e-06	0.148537	0.030514	A	-	5	411361	C5orf55	1
5:411361:A:G	eQTLcatalogue	BLUEPRINT_ge_T-cell	ENSG00000225138	G	1.26899e-10	0.520132	6.34495e-07	A	-	5	411361	CTD-2228K2.7	1
5:412112:C:T	eQTLcatalogue	BLUEPRINT_ge_T-cell	ENSG00000221990	C	6.39408e-06	0.148355	0.0319704	T	-	5	412112	C5orf55	1
5:412112:C:T	eQTLcatalogue	BLUEPRINT_ge_T-cell	ENSG00000225138	C	1.32705e-10	0.520076	6.63525e-07	T	-	5	412112	CTD-2228K2.7	1
5:413591:A:G	eQTLcatalogue	BLUEPRINT_ge_T-cell	ENSG00000221990	G	4.01951e-06	0.14637	0.0200975	A	-	5	413591	C5orf55	1
5:413591:A:G	eQTLcatalogue	BLUEPRINT_ge_T-cell	ENSG00000225138	G	1.71636e-10	0.50023	8.5818e-07	A	-	5	413591	CTD-2228K2.7	1
5:416118:A:G	eQTLcatalogue	BLUEPRINT_ge_T-cell	ENSG00000225138	G	2.15775e-09	0.512255	1.07887e-05	A	-	5	416118	CTD-2228K2.7	1
5:416672:A:G	eQTLcatalogue	BLUEPRINT_ge_T-cell	ENSG00000225138	G	2.18907e-09	0.511987	1.09454e-05	A	-	5	416672	CTD-2228K2.7	1
5:418494:A:G	eQTLcatalogue	BLUEPRINT_ge_T-cell	ENSG00000225138	A	8.41994e-10	0.52518	4.20997e-06	G	-	5	418494	CTD-2228K2.7	1
5:421403:A:G	eQTLcatalogue	BLUEPRINT_ge_T-cell	ENSG00000225138	G	8.48742e-10	0.525335	4.24371e-06	A	-	5	421403	CTD-2228K2.7	1
5:421455:G:T	eQTLcatalogue	BLUEPRINT_ge_T-cell	ENSG00000225138	G	8.35725e-10	0.525268	4.17863e-06	T	-	5	421455	CTD-2228K2.7	1
5:422178:A:G	eQTLcatalogue	BLUEPRINT_ge_T-cell	ENSG00000225138	G	2.06347e-07	0.438283	0.00103173	A	-	5	422178	CTD-2228K2.7	1
5:423169:C:T	eQTLcatalogue	BLUEPRINT_ge_T-cell	ENSG00000225138	C	2.49173e-07	0.434246	0.00124587	T	-	5	423169	CTD-2228K2.7	1
5:423595:C:T	eQTLcatalogue	BLUEPRINT_ge_T-cell	ENSG00000225138	C	2.58485e-07	0.433756	0.00129243	T	-	5	423595	CTD-2228K2.7	1
5:423906:A:G	eQTLcatalogue	BLUEPRINT_ge_T-cell	ENSG00000225138	G	2.51455e-07	0.434257	0.00125727	A	-	5	423906	CTD-2228K2.7	1
5:428236:A:C	eQTLcatalogue	BLUEPRINT_ge_T-cell	ENSG00000225138	C	1.34357e-07	0.438702	0.000671785	A	-	5	428236	CTD-2228K2.7	1
5:429124:C:G	eQTLcatalogue	BLUEPRINT_ge_T-cell	ENSG00000225138	C	1.33064e-07	0.438849	0.00066532	G	-	5	429124	CTD-2228K2.7	1
5:429818:C:G	eQTLcatalogue	BLUEPRINT_ge_T-cell	ENSG00000225138	C	1.34654e-07	0.438929	0.00067327	G	-	5	429818	CTD-2228K2.7	1
5:430059:A:G	eQTLcatalogue	BLUEPRINT_ge_T-cell	ENSG00000225138	G	1.33816e-07	0.438921	0.00066908	A	-	5	430059	CTD-2228K2.7	1
5:434722:C:G	eQTLcatalogue	BLUEPRINT_ge_T-cell	ENSG00000225138	G	1.33139e-07	0.438878	0.000665695	C	-	5	434722	CTD-2228K2.7	1
5:437542:C:T	eQTLcatalogue	BLUEPRINT_ge_T-cell	ENSG00000225138	T	1.3348e-07	0.438819	0.0006674	C	-	5	437542	CTD-2228K2.7	1
5:437586:A:G	eQTLcatalogue	BLUEPRINT_ge_T-cell	ENSG00000225138	G	1.3348e-07	0.438819	0.0006674	A	-	5	437586	CTD-2228K2.7	1
5:437667:A:G	eQTLcatalogue	BLUEPRINT_ge_T-cell	ENSG00000225138	G	1.33614e-07	0.438792	0.00066807	A	-	5	437667	CTD-2228K2.7	1
5:437862:C:G	eQTLcatalogue	BLUEPRINT_ge_T-cell	ENSG00000225138	G	1.31924e-07	0.439064	0.00065962	C	-	5	437862	CTD-2228K2.7	1
10:70733935:C:T	eQTLcatalogue	BLUEPRINT_ge_T-cell	ENSG00000165730	C	2.92054e-09	1.08655	1.46027e-05	T	-	10	70733935	STOX1	1
10:70736879:A:C	eQTLcatalogue	BLUEPRINT_ge_T-cell	ENSG00000165730	A	7.29391e-09	1.02543	3.64695e-05	C	-	10	70736879	STOX1	1
10:70737972:C:T	eQTLcatalogue	BLUEPRINT_ge_T-cell	ENSG00000165730	T	7.29391e-09	1.02543	3.64695e-05	C	-	10	70737972	STOX1	1
10:70740091:A:G	eQTLcatalogue	BLUEPRINT_ge_T-cell	ENSG00000165730	G	7.29391e-09	1.02543	3.64695e-05	A	-	10	70740091	STOX1	1
10:70884514:A:G	eQTLcatalogue	BLUEPRINT_ge_T-cell	ENSG00000122862	A	5.28498e-13	0.244813	2.64249e-09	G	-	10	70884514	SRGN	1
10:70884514:A:G	eQTLcatalogue	BLUEPRINT_ge_T-cell	ENSG00000122958	A	1.44163e-17	0.140262	7.20815e-14	G	-	10	70884514	VPS26A	1
10:70890541:C:T	eQTLcatalogue	BLUEPRINT_ge_T-cell	ENSG00000122862	T	1.0958e-12	0.242705	5.479e-09	C	-	10	70890541	SRGN	1
10:70890541:C:T	eQTLcatalogue	BLUEPRINT_ge_T-cell	ENSG00000122958	T	7.7149e-18	0.141656	3.85745e-14	C	-	10	70890541	VPS26A	1
10:70902716:A:G	eQTLcatalogue	BLUEPRINT_ge_T-cell	ENSG00000122862	G	4.6656e-09	0.212364	2.3328e-05	A	-	10	70902716	SRGN	1
10:70902716:A:G	eQTLcatalogue	BLUEPRINT_ge_T-cell	ENSG00000122958	G	8.64454e-16	0.139316	4.32227e-12	A	-	10	70902716	VPS26A	1
10:70903844:C:G	eQTLcatalogue	BLUEPRINT_ge_T-cell	ENSG00000122862	C	1.0873e-11	0.237282	5.4365e-08	G	-	10	70903844	SRGN	1
10:70903844:C:G	eQTLcatalogue	BLUEPRINT_ge_T-cell	ENSG00000122958	C	1.48229e-16	0.139492	7.41145e-13	G	-	10	70903844	VPS26A	1
10:70944798:C:T	eQTLcatalogue	BLUEPRINT_ge_T-cell	ENSG00000122862	T	6.56617e-10	0.218373	3.28308e-06	C	-	10	70944798	SRGN	1
10:70944798:C:T	eQTLcatalogue	BLUEPRINT_ge_T-cell	ENSG00000122958	T	5.30652e-17	0.14124	2.65326e-13	C	-	10	70944798	VPS26A	1
11:457879:C:T	eQTLcatalogue	BLUEPRINT_ge_T-cell	ENSG00000023191	C	3.73344e-09	-0.0798206	1.86672e-05	C	-	11	457879	RNH1	1
11:458595:A:G	eQTLcatalogue	BLUEPRINT_ge_T-cell	ENSG00000023191	G	2.89558e-08	-0.0781653	0.000144779	G	-	11	458595	RNH1	1
11:460765:A:G	eQTLcatalogue	BLUEPRINT_ge_T-cell	ENSG00000023191	A	1.41331e-09	-0.081106	7.06655e-06	A	-	11	460765	RNH1	1
11:462684:C:T	eQTLcatalogue	BLUEPRINT_ge_T-cell	ENSG00000023191	C	2.89558e-08	-0.0781653	0.000144779	C	-	11	462684	RNH1	1
11:462855:A:G	eQTLcatalogue	BLUEPRINT_ge_T-cell	ENSG00000023191	G	1.41331e-09	-0.081106	7.06655e-06	G	-	11	462855	RNH1	1
11:467368:A:G	eQTLcatalogue	BLUEPRINT_ge_T-cell	ENSG00000023191	A	1.41331e-09	-0.081106	7.06655e-06	A	-	11	467368	RNH1	1
11:473300:G:T	eQTLcatalogue	BLUEPRINT_ge_T-cell	ENSG00000023191	G	1.41984e-09	-0.0811217	7.0992e-06	G	-	11	473300	RNH1	1
11:477623:C:T	eQTLcatalogue	BLUEPRINT_ge_T-cell	ENSG00000023191	C	1.41224e-09	-0.0811089	7.0612e-06	C	-	11	477623	RNH1	1
11:484469:C:T	eQTLcatalogue	BLUEPRINT_ge_T-cell	ENSG00000023191	C	1.41331e-09	-0.081106	7.06655e-06	C	-	11	484469	RNH1	1
11:486414:A:G	eQTLcatalogue	BLUEPRINT_ge_T-cell	ENSG00000023191	G	1.41232e-09	-0.0811189	7.0616e-06	G	-	11	486414	RNH1	1
11:487101:C:T	eQTLcatalogue	BLUEPRINT_ge_T-cell	ENSG00000023191	C	1.41362e-09	-0.081107	7.0681e-06	C	-	11	487101	RNH1	1
11:487136:A:G	eQTLcatalogue	BLUEPRINT_ge_T-cell	ENSG00000023191	G	3.24959e-08	-0.0774272	0.000162479	G	-	11	487136	RNH1	1
11:487201:C:T	eQTLcatalogue	BLUEPRINT_ge_T-cell	ENSG00000023191	T	1.41501e-09	-0.0811042	7.07505e-06	T	-	11	487201	RNH1	1
11:491334:A:C	eQTLcatalogue	BLUEPRINT_ge_T-cell	ENSG00000023191	A	4.79514e-10	-0.0857016	2.39757e-06	A	-	11	491334	RNH1	1
11:494662:A:G	eQTLcatalogue	BLUEPRINT_ge_T-cell	ENSG00000023191	G	6.7127e-10	-0.0825308	3.35635e-06	G	-	11	494662	RNH1	1
11:495699:A:C	eQTLcatalogue	BLUEPRINT_ge_T-cell	ENSG00000023191	A	6.68603e-10	-0.0825347	3.34302e-06	A	-	11	495699	RNH1	1
11:495892:C:G	eQTLcatalogue	BLUEPRINT_ge_T-cell	ENSG00000023191	C	6.6566e-10	-0.0825374	3.3283e-06	C	-	11	495892	RNH1	1
11:496193:G:T	eQTLcatalogue	BLUEPRINT_ge_T-cell	ENSG00000023191	T	3.75989e-09	-0.0787961	1.87994e-05	T	-	11	496193	RNH1	1
11:501468:A:G	eQTLcatalogue	BLUEPRINT_ge_T-cell	ENSG00000023191	G	6.65405e-10	-0.0825435	3.32703e-06	G	-	11	501468	RNH1	1
11:502371:A:G	eQTLcatalogue	BLUEPRINT_ge_T-cell	ENSG00000023191	G	6.6566e-10	-0.0825374	3.3283e-06	G	-	11	502371	RNH1	1
11:503710:C:T	eQTLcatalogue	BLUEPRINT_ge_T-cell	ENSG00000023191	C	6.6566e-10	-0.0825374	3.3283e-06	C	-	11	503710	RNH1	1
11:504411:C:G	eQTLcatalogue	BLUEPRINT_ge_T-cell	ENSG00000023191	C	6.6566e-10	-0.0825374	3.3283e-06	C	-	11	504411	RNH1	1
11:506229:C:T	eQTLcatalogue	BLUEPRINT_ge_T-cell	ENSG00000023191	C	4.78271e-10	-0.0856554	2.39135e-06	C	-	11	506229	RNH1	1
11:506442:G:T	eQTLcatalogue	BLUEPRINT_ge_T-cell	ENSG00000023191	G	5.17749e-10	-0.0842166	2.58875e-06	G	-	11	506442	RNH1	1
11:506596:C:T	eQTLcatalogue	BLUEPRINT_ge_T-cell	ENSG00000023191	C	4.78271e-10	-0.0856554	2.39135e-06	C	-	11	506596	RNH1	1
12:104331157:C:T	eQTLcatalogue	BLUEPRINT_ge_T-cell	ENSG00000139372	C	7.83708e-07	0.0913619	0.00391854	C	+	12	104331157	TDG	1
12:104333828:C:T	eQTLcatalogue	BLUEPRINT_ge_T-cell	ENSG00000139372	C	7.77066e-07	0.0913623	0.00388533	C	+	12	104333828	TDG	1
12:104334303:C:T	eQTLcatalogue	BLUEPRINT_ge_T-cell	ENSG00000139372	T	7.77066e-07	0.0913623	0.00388533	T	+	12	104334303	TDG	1
12:104337667:A:G	eQTLcatalogue	BLUEPRINT_ge_T-cell	ENSG00000139372	G	7.77066e-07	0.0913623	0.00388533	G	+	12	104337667	TDG	1
14:74485133:C:T	eQTLcatalogue	BLUEPRINT_ge_T-cell	ENSG00000119723	C	4.75036e-10	-0.0921635	2.37518e-06	T	+	14	74485133	COQ6	1
14:74485133:C:T	eQTLcatalogue	BLUEPRINT_ge_T-cell	ENSG00000156050	C	5.17191e-10	-0.177903	2.58596e-06	T	+	14	74485133	FAM161B	1
14:74485133:C:T	eQTLcatalogue	BLUEPRINT_ge_T-cell	ENSG00000187097	C	6.44328e-12	-0.153703	3.22164e-08	T	+	14	74485133	ENTPD5	1
14:74485133:C:T	eQTLcatalogue	BLUEPRINT_ge_T-cell	ENSG00000259065	C	3.66164e-25	0.876509	1.83082e-21	T	-	14	74485133	RP5-1021I20.1	1
5:418093:A:G	eQTLcatalogue	BrainSeq_ge_brain	ENSG00000066230	A	9.56896e-14	-0.389037	4.78448e-10	G	+	5	418093	SLC9A3	1
5:418093:A:G	eQTLcatalogue	BrainSeq_ge_brain	ENSG00000225138	A	4.31908e-10	-0.316351	2.15954e-06	G	+	5	418093	CTD-2228K2.7	1
5:421426:A:C	eQTLcatalogue	BrainSeq_ge_brain	ENSG00000066230	A	3.18874e-14	-0.402485	1.59437e-10	C	+	5	421426	SLC9A3	1
5:421426:A:C	eQTLcatalogue	BrainSeq_ge_brain	ENSG00000225138	A	2.52314e-10	-0.325569	1.26157e-06	C	+	5	421426	CTD-2228K2.7	1
5:430217:C:T	eQTLcatalogue	BrainSeq_ge_brain	ENSG00000180104	C	9.62278e-08	-0.0477503	0.000481139	T	+	5	430217	EXOC3	1
11:458595:A:G	eQTLcatalogue	BrainSeq_ge_brain	ENSG00000023191	G	3.83128e-07	-0.121946	0.00191564	G	-	11	458595	RNH1	1
11:458595:A:G	eQTLcatalogue	BrainSeq_ge_brain	ENSG00000174915	G	1.3975e-06	-0.110794	0.0069875	G	-	11	458595	PTDSS2	1
11:460765:A:G	eQTLcatalogue	BrainSeq_ge_brain	ENSG00000023191	A	6.12266e-08	-0.121397	0.000306133	A	-	11	460765	RNH1	1
11:460765:A:G	eQTLcatalogue	BrainSeq_ge_brain	ENSG00000174915	A	7.19512e-08	-0.115302	0.000359756	A	-	11	460765	PTDSS2	1
11:462684:C:T	eQTLcatalogue	BrainSeq_ge_brain	ENSG00000023191	C	4.01915e-07	-0.121848	0.00200957	C	-	11	462684	RNH1	1
11:462684:C:T	eQTLcatalogue	BrainSeq_ge_brain	ENSG00000174915	C	1.40524e-06	-0.110874	0.0070262	C	-	11	462684	PTDSS2	1
11:462855:A:G	eQTLcatalogue	BrainSeq_ge_brain	ENSG00000023191	G	6.04604e-08	-0.121457	0.000302302	G	-	11	462855	RNH1	1
11:462855:A:G	eQTLcatalogue	BrainSeq_ge_brain	ENSG00000174915	G	6.89513e-08	-0.115472	0.000344756	G	-	11	462855	PTDSS2	1
11:467368:A:G	eQTLcatalogue	BrainSeq_ge_brain	ENSG00000023191	A	5.88391e-08	-0.121589	0.000294195	A	-	11	467368	RNH1	1
11:467368:A:G	eQTLcatalogue	BrainSeq_ge_brain	ENSG00000174915	A	6.37166e-08	-0.11579	0.000318583	A	-	11	467368	PTDSS2	1
11:473300:G:T	eQTLcatalogue	BrainSeq_ge_brain	ENSG00000023191	G	6.62087e-08	-0.121722	0.000331044	G	-	11	473300	RNH1	1
11:473300:G:T	eQTLcatalogue	BrainSeq_ge_brain	ENSG00000174915	G	4.05167e-08	-0.118037	0.000202583	G	-	11	473300	PTDSS2	1
11:477623:C:T	eQTLcatalogue	BrainSeq_ge_brain	ENSG00000023191	C	7.52926e-08	-0.121245	0.000376463	C	-	11	477623	RNH1	1
11:477623:C:T	eQTLcatalogue	BrainSeq_ge_brain	ENSG00000174915	C	3.39464e-08	-0.118714	0.000169732	C	-	11	477623	PTDSS2	1
11:484469:C:T	eQTLcatalogue	BrainSeq_ge_brain	ENSG00000023191	C	7.52661e-08	-0.121238	0.000376331	C	-	11	484469	RNH1	1
11:484469:C:T	eQTLcatalogue	BrainSeq_ge_brain	ENSG00000174915	C	3.40452e-08	-0.118695	0.000170226	C	-	11	484469	PTDSS2	1
11:486414:A:G	eQTLcatalogue	BrainSeq_ge_brain	ENSG00000023191	G	7.65683e-08	-0.121182	0.000382842	G	-	11	486414	RNH1	1
11:486414:A:G	eQTLcatalogue	BrainSeq_ge_brain	ENSG00000174915	G	3.55669e-08	-0.118546	0.000177834	G	-	11	486414	PTDSS2	1
11:487101:C:T	eQTLcatalogue	BrainSeq_ge_brain	ENSG00000023191	C	7.61932e-08	-0.121181	0.000380966	C	-	11	487101	RNH1	1
11:487101:C:T	eQTLcatalogue	BrainSeq_ge_brain	ENSG00000174915	C	3.43386e-08	-0.118655	0.000171693	C	-	11	487101	PTDSS2	1
11:487136:A:G	eQTLcatalogue	BrainSeq_ge_brain	ENSG00000023191	G	7.29109e-07	-0.120075	0.00364555	G	-	11	487136	RNH1	1
11:487136:A:G	eQTLcatalogue	BrainSeq_ge_brain	ENSG00000174915	G	1.07443e-06	-0.112926	0.00537215	G	-	11	487136	PTDSS2	1
11:487201:C:T	eQTLcatalogue	BrainSeq_ge_brain	ENSG00000023191	T	7.64632e-08	-0.121179	0.000382316	T	-	11	487201	RNH1	1
11:487201:C:T	eQTLcatalogue	BrainSeq_ge_brain	ENSG00000174915	T	3.54207e-08	-0.118553	0.000177103	T	-	11	487201	PTDSS2	1
11:490035:C:T	eQTLcatalogue	BrainSeq_ge_brain	ENSG00000023191	C	5.44562e-06	-0.115763	0.0272281	C	-	11	490035	RNH1	1
11:490035:C:T	eQTLcatalogue	BrainSeq_ge_brain	ENSG00000174915	C	1.14714e-07	-0.128383	0.00057357	C	-	11	490035	PTDSS2	1
11:491334:A:C	eQTLcatalogue	BrainSeq_ge_brain	ENSG00000023191	A	7.73763e-08	-0.121118	0.000386882	A	-	11	491334	RNH1	1
11:491334:A:C	eQTLcatalogue	BrainSeq_ge_brain	ENSG00000174915	A	3.48854e-08	-0.118595	0.000174427	A	-	11	491334	PTDSS2	1
11:494662:A:G	eQTLcatalogue	BrainSeq_ge_brain	ENSG00000023191	G	7.65162e-08	-0.121102	0.000382581	G	-	11	494662	RNH1	1
11:494662:A:G	eQTLcatalogue	BrainSeq_ge_brain	ENSG00000174915	G	3.43725e-08	-0.11859	0.000171862	G	-	11	494662	PTDSS2	1
11:495699:A:C	eQTLcatalogue	BrainSeq_ge_brain	ENSG00000023191	A	7.67533e-08	-0.121082	0.000383767	A	-	11	495699	RNH1	1
11:495699:A:C	eQTLcatalogue	BrainSeq_ge_brain	ENSG00000174915	A	3.43568e-08	-0.118585	0.000171784	A	-	11	495699	PTDSS2	1
11:495892:C:G	eQTLcatalogue	BrainSeq_ge_brain	ENSG00000023191	C	7.6735e-08	-0.121083	0.000383675	C	-	11	495892	RNH1	1
11:495892:C:G	eQTLcatalogue	BrainSeq_ge_brain	ENSG00000174915	C	3.43475e-08	-0.118585	0.000171738	C	-	11	495892	PTDSS2	1
11:496193:G:T	eQTLcatalogue	BrainSeq_ge_brain	ENSG00000023191	T	1.28397e-07	-0.11817	0.000641985	T	-	11	496193	RNH1	1
11:496193:G:T	eQTLcatalogue	BrainSeq_ge_brain	ENSG00000174915	T	4.86189e-08	-0.116452	0.000243094	T	-	11	496193	PTDSS2	1
11:501468:A:G	eQTLcatalogue	BrainSeq_ge_brain	ENSG00000023191	G	7.79446e-08	-0.120955	0.000389723	G	-	11	501468	RNH1	1
11:501468:A:G	eQTLcatalogue	BrainSeq_ge_brain	ENSG00000174915	G	3.44582e-08	-0.118509	0.000172291	G	-	11	501468	PTDSS2	1
11:502371:A:G	eQTLcatalogue	BrainSeq_ge_brain	ENSG00000023191	G	2.10146e-06	-0.101586	0.0105073	G	-	11	502371	RNH1	1
11:502371:A:G	eQTLcatalogue	BrainSeq_ge_brain	ENSG00000174915	G	7.02464e-07	-0.101321	0.00351232	G	-	11	502371	PTDSS2	1
11:503385:C:G	eQTLcatalogue	BrainSeq_ge_brain	ENSG00000023191	C	8.15767e-08	-0.120693	0.000407884	C	-	11	503385	RNH1	1
11:503385:C:G	eQTLcatalogue	BrainSeq_ge_brain	ENSG00000174915	C	3.28907e-08	-0.118598	0.000164453	C	-	11	503385	PTDSS2	1
11:503710:C:T	eQTLcatalogue	BrainSeq_ge_brain	ENSG00000023191	C	8.11054e-08	-0.120733	0.000405527	C	-	11	503710	RNH1	1
11:503710:C:T	eQTLcatalogue	BrainSeq_ge_brain	ENSG00000174915	C	3.30596e-08	-0.118597	0.000165298	C	-	11	503710	PTDSS2	1
11:504411:C:G	eQTLcatalogue	BrainSeq_ge_brain	ENSG00000023191	C	8.00696e-08	-0.120878	0.000400348	C	-	11	504411	RNH1	1
11:504411:C:G	eQTLcatalogue	BrainSeq_ge_brain	ENSG00000174915	C	3.34744e-08	-0.118643	0.000167372	C	-	11	504411	PTDSS2	1
11:506229:C:T	eQTLcatalogue	BrainSeq_ge_brain	ENSG00000023191	C	7.78875e-08	-0.121155	0.000389438	C	-	11	506229	RNH1	1
11:506229:C:T	eQTLcatalogue	BrainSeq_ge_brain	ENSG00000174915	C	3.44627e-08	-0.118702	0.000172314	C	-	11	506229	PTDSS2	1
11:506442:G:T	eQTLcatalogue	BrainSeq_ge_brain	ENSG00000023191	G	7.71236e-08	-0.121225	0.000385618	G	-	11	506442	RNH1	1
11:506442:G:T	eQTLcatalogue	BrainSeq_ge_brain	ENSG00000174915	G	3.45745e-08	-0.11872	0.000172873	G	-	11	506442	PTDSS2	1
11:506596:C:T	eQTLcatalogue	BrainSeq_ge_brain	ENSG00000023191	C	7.71379e-08	-0.121228	0.000385689	C	-	11	506596	RNH1	1
11:506596:C:T	eQTLcatalogue	BrainSeq_ge_brain	ENSG00000174915	C	3.45742e-08	-0.118724	0.000172871	C	-	11	506596	PTDSS2	1
14:74480794:C:G	eQTLcatalogue	BrainSeq_ge_brain	ENSG00000259065	G	4.71885e-18	0.750142	2.35943e-14	C	-	14	74480794	RP5-1021I20.1	1
14:74485133:C:T	eQTLcatalogue	BrainSeq_ge_brain	ENSG00000259065	C	6.1552e-18	0.746576	3.0776e-14	T	-	14	74485133	RP5-1021I20.1	1
2:68385097:A:G	eQTLcatalogue	CEDAR_B-cell_CD19	ENSG00000243667	A	1.22768e-10	-0.0955472	6.1384e-07	G	+	2	68385097	WDR92	1
2:68385097:A:G	eQTLcatalogue	CEDAR_B-cell_CD19	ENSG00000221823	A	7.72105e-06	0.167822	0.0386053	G	-	2	68385097	PPP3R1	1
2:68393144:A:T	eQTLcatalogue	CEDAR_B-cell_CD19	ENSG00000243667	T	7.75184e-10	-0.0908262	3.87592e-06	A	+	2	68393144	WDR92	1
2:68394184:C:T	eQTLcatalogue	CEDAR_B-cell_CD19	ENSG00000243667	C	7.99974e-10	-0.0907487	3.99987e-06	T	+	2	68394184	WDR92	1
2:68395631:A:G	eQTLcatalogue	CEDAR_B-cell_CD19	ENSG00000243667	G	8.36226e-10	-0.0906237	4.18113e-06	A	+	2	68395631	WDR92	1
2:68398919:C:G	eQTLcatalogue	CEDAR_B-cell_CD19	ENSG00000243667	G	1.36658e-09	-0.0896771	6.8329e-06	C	+	2	68398919	WDR92	1
2:68398919:C:G	eQTLcatalogue	CEDAR_B-cell_CD19	ENSG00000221823	G	6.95473e-06	0.167359	0.0347737	C	-	2	68398919	PPP3R1	1
2:68399190:C:T	eQTLcatalogue	CEDAR_B-cell_CD19	ENSG00000243667	C	1.42983e-09	-0.089527	7.14915e-06	T	+	2	68399190	WDR92	1
2:68399190:C:T	eQTLcatalogue	CEDAR_B-cell_CD19	ENSG00000221823	C	6.93808e-06	0.167285	0.0346904	T	-	2	68399190	PPP3R1	1
2:68402012:G:T	eQTLcatalogue	CEDAR_B-cell_CD19	ENSG00000243667	G	1.56938e-09	-0.0892311	7.8469e-06	T	+	2	68402012	WDR92	1
2:68402012:G:T	eQTLcatalogue	CEDAR_B-cell_CD19	ENSG00000221823	G	7.4775e-06	0.166548	0.0373875	T	-	2	68402012	PPP3R1	1
2:68402830:C:G	eQTLcatalogue	CEDAR_B-cell_CD19	ENSG00000243667	G	1.57069e-09	-0.0892322	7.85345e-06	C	+	2	68402830	WDR92	1
2:68402830:C:G	eQTLcatalogue	CEDAR_B-cell_CD19	ENSG00000221823	G	7.47248e-06	0.166558	0.0373624	C	-	2	68402830	PPP3R1	1
2:68410372:A:C	eQTLcatalogue	CEDAR_B-cell_CD19	ENSG00000243667	C	2.15312e-09	-0.0888639	1.07656e-05	A	+	2	68410372	WDR92	1
2:68410372:A:C	eQTLcatalogue	CEDAR_B-cell_CD19	ENSG00000221823	C	9.88736e-06	0.16503	0.0494368	A	-	2	68410372	PPP3R1	1
2:68410660:G:T	eQTLcatalogue	CEDAR_B-cell_CD19	ENSG00000243667	T	2.14917e-09	-0.088871	1.07458e-05	G	+	2	68410660	WDR92	1
2:68410660:G:T	eQTLcatalogue	CEDAR_B-cell_CD19	ENSG00000221823	T	9.87174e-06	0.165048	0.0493587	G	-	2	68410660	PPP3R1	1
2:68411414:A:G	eQTLcatalogue	CEDAR_B-cell_CD19	ENSG00000243667	G	2.15345e-09	-0.0888709	1.07672e-05	A	+	2	68411414	WDR92	1
2:68411414:A:G	eQTLcatalogue	CEDAR_B-cell_CD19	ENSG00000221823	G	9.86794e-06	0.165059	0.0493397	A	-	2	68411414	PPP3R1	1
2:68418868:A:T	eQTLcatalogue	CEDAR_B-cell_CD19	ENSG00000243667	A	2.14829e-09	-0.0889489	1.07414e-05	T	+	2	68418868	WDR92	1
2:68418868:A:T	eQTLcatalogue	CEDAR_B-cell_CD19	ENSG00000221823	A	9.75019e-06	0.165287	0.048751	T	-	2	68418868	PPP3R1	1
2:68419487:A:G	eQTLcatalogue	CEDAR_B-cell_CD19	ENSG00000243667	G	2.14556e-09	-0.0889527	1.07278e-05	A	+	2	68419487	WDR92	1
2:68419487:A:G	eQTLcatalogue	CEDAR_B-cell_CD19	ENSG00000221823	G	9.7477e-06	0.165291	0.0487385	A	-	2	68419487	PPP3R1	1
2:68420070:G:T	eQTLcatalogue	CEDAR_B-cell_CD19	ENSG00000243667	G	2.148e-09	-0.0889503	1.074e-05	T	+	2	68420070	WDR92	1
2:68420070:G:T	eQTLcatalogue	CEDAR_B-cell_CD19	ENSG00000221823	G	9.75291e-06	0.165287	0.0487646	T	-	2	68420070	PPP3R1	1
2:68421049:A:G	eQTLcatalogue	CEDAR_B-cell_CD19	ENSG00000243667	G	2.1487e-09	-0.0889483	1.07435e-05	A	+	2	68421049	WDR92	1
2:68421049:A:G	eQTLcatalogue	CEDAR_B-cell_CD19	ENSG00000221823	G	9.75028e-06	0.165287	0.0487514	A	-	2	68421049	PPP3R1	1
2:68422771:A:G	eQTLcatalogue	CEDAR_B-cell_CD19	ENSG00000243667	G	2.15082e-09	-0.0889435	1.07541e-05	A	+	2	68422771	WDR92	1
2:68422771:A:G	eQTLcatalogue	CEDAR_B-cell_CD19	ENSG00000221823	G	9.75006e-06	0.165282	0.0487503	A	-	2	68422771	PPP3R1	1
2:68423530:A:G	eQTLcatalogue	CEDAR_B-cell_CD19	ENSG00000243667	G	2.1558e-09	-0.0889356	1.0779e-05	A	+	2	68423530	WDR92	1
2:68423530:A:G	eQTLcatalogue	CEDAR_B-cell_CD19	ENSG00000221823	G	9.75537e-06	0.165273	0.0487768	A	-	2	68423530	PPP3R1	1
2:68430925:C:T	eQTLcatalogue	CEDAR_B-cell_CD19	ENSG00000243667	C	2.15515e-09	-0.0887855	1.07757e-05	T	+	2	68430925	WDR92	1
2:68430925:C:T	eQTLcatalogue	CEDAR_B-cell_CD19	ENSG00000221823	C	9.87363e-06	0.164899	0.0493681	T	-	2	68430925	PPP3R1	1
2:68431259:A:G	eQTLcatalogue	CEDAR_B-cell_CD19	ENSG00000243667	G	2.15983e-09	-0.0887735	1.07991e-05	A	+	2	68431259	WDR92	1
2:68431259:A:G	eQTLcatalogue	CEDAR_B-cell_CD19	ENSG00000221823	G	9.89609e-06	0.164868	0.0494804	A	-	2	68431259	PPP3R1	1
2:68433831:A:G	eQTLcatalogue	CEDAR_B-cell_CD19	ENSG00000243667	G	2.14882e-09	-0.0887082	1.07441e-05	A	+	2	68433831	WDR92	1
2:68435431:C:G	eQTLcatalogue	CEDAR_B-cell_CD19	ENSG00000243667	C	2.6647e-09	-0.0885818	1.33235e-05	G	+	2	68435431	WDR92	1
2:68438614:C:T	eQTLcatalogue	CEDAR_B-cell_CD19	ENSG00000243667	C	1.98461e-09	-0.0895704	9.92305e-06	T	+	2	68438614	WDR92	1
2:68438614:C:T	eQTLcatalogue	CEDAR_B-cell_CD19	ENSG00000221823	C	9.33485e-06	0.166448	0.0466743	T	-	2	68438614	PPP3R1	1
2:68439960:C:T	eQTLcatalogue	CEDAR_B-cell_CD19	ENSG00000243667	C	1.9951e-09	-0.0895198	9.9755e-06	T	+	2	68439960	WDR92	1
2:68443651:A:G	eQTLcatalogue	CEDAR_B-cell_CD19	ENSG00000243667	A	1.99125e-09	-0.0899203	9.95625e-06	G	+	2	68443651	WDR92	1
2:68443651:A:G	eQTLcatalogue	CEDAR_B-cell_CD19	ENSG00000221823	A	9.75538e-06	0.166767	0.0487769	G	-	2	68443651	PPP3R1	1
2:68443835:A:T	eQTLcatalogue	CEDAR_B-cell_CD19	ENSG00000243667	A	1.92704e-09	-0.0899713	9.6352e-06	T	+	2	68443835	WDR92	1
2:68443835:A:T	eQTLcatalogue	CEDAR_B-cell_CD19	ENSG00000221823	A	9.90214e-06	0.166607	0.0495107	T	-	2	68443835	PPP3R1	1
2:68446936:C:T	eQTLcatalogue	CEDAR_B-cell_CD19	ENSG00000243667	C	2.07326e-09	-0.0902856	1.03663e-05	T	+	2	68446936	WDR92	1
2:68446936:C:T	eQTLcatalogue	CEDAR_B-cell_CD19	ENSG00000221823	C	8.58744e-06	0.168618	0.0429372	T	-	2	68446936	PPP3R1	1
2:68457573:C:T	eQTLcatalogue	CEDAR_B-cell_CD19	ENSG00000243667	C	1.77002e-09	-0.0914069	8.8501e-06	T	+	2	68457573	WDR92	1
2:68457573:C:T	eQTLcatalogue	CEDAR_B-cell_CD19	ENSG00000221823	C	8.39059e-06	0.170216	0.041953	T	-	2	68457573	PPP3R1	1
2:68457854:A:G	eQTLcatalogue	CEDAR_B-cell_CD19	ENSG00000243667	A	1.76835e-09	-0.091423	8.84175e-06	G	+	2	68457854	WDR92	1
2:68457854:A:G	eQTLcatalogue	CEDAR_B-cell_CD19	ENSG00000221823	A	8.39675e-06	0.170236	0.0419837	G	-	2	68457854	PPP3R1	1
2:68463612:A:G	eQTLcatalogue	CEDAR_B-cell_CD19	ENSG00000243667	G	1.95463e-09	-0.0916343	9.77315e-06	A	+	2	68463612	WDR92	1
2:68463612:A:G	eQTLcatalogue	CEDAR_B-cell_CD19	ENSG00000221823	G	7.38684e-06	0.172073	0.0369342	A	-	2	68463612	PPP3R1	1
2:68467910:A:C	eQTLcatalogue	CEDAR_B-cell_CD19	ENSG00000243667	A	1.85581e-09	-0.0916815	9.27905e-06	C	+	2	68467910	WDR92	1
2:68467910:A:C	eQTLcatalogue	CEDAR_B-cell_CD19	ENSG00000221823	A	8.53861e-06	0.170792	0.0426931	C	-	2	68467910	PPP3R1	1
2:68475595:A:C	eQTLcatalogue	CEDAR_B-cell_CD19	ENSG00000243667	C	2.04047e-09	-0.0914976	1.02024e-05	A	+	2	68475595	WDR92	1
2:68475595:A:C	eQTLcatalogue	CEDAR_B-cell_CD19	ENSG00000221823	C	8.91816e-06	0.170512	0.0445908	A	-	2	68475595	PPP3R1	1
2:68477248:C:T	eQTLcatalogue	CEDAR_B-cell_CD19	ENSG00000243667	T	1.82844e-09	-0.0920697	9.1422e-06	C	+	2	68477248	WDR92	1
2:68477248:C:T	eQTLcatalogue	CEDAR_B-cell_CD19	ENSG00000221823	T	8.31107e-06	0.171666	0.0415554	C	-	2	68477248	PPP3R1	1
2:68478919:A:G	eQTLcatalogue	CEDAR_B-cell_CD19	ENSG00000243667	A	3.74071e-09	-0.0907638	1.87035e-05	G	+	2	68478919	WDR92	1
3:153992586:A:G	eQTLcatalogue	CEDAR_B-cell_CD19	ENSG00000174953	A	2.01188e-06	-0.106884	0.0100594	G	+	3	153992586	DHX36	1
3:154004009:C:T	eQTLcatalogue	CEDAR_B-cell_CD19	ENSG00000174953	T	2.62867e-06	-0.10584	0.0131434	C	+	3	154004009	DHX36	1
3:154009933:C:T	eQTLcatalogue	CEDAR_B-cell_CD19	ENSG00000174953	T	1.99623e-06	-0.106945	0.00998115	C	+	3	154009933	DHX36	1
3:154036196:A:G	eQTLcatalogue	CEDAR_B-cell_CD19	ENSG00000174953	A	1.9101e-06	-0.107253	0.0095505	G	+	3	154036196	DHX36	1
3:154036657:C:T	eQTLcatalogue	CEDAR_B-cell_CD19	ENSG00000174953	C	1.93912e-06	-0.107243	0.0096956	T	+	3	154036657	DHX36	1
3:154040273:A:G	eQTLcatalogue	CEDAR_B-cell_CD19	ENSG00000174953	G	1.89544e-06	-0.107299	0.0094772	A	+	3	154040273	DHX36	1
2:68385097:A:G	eQTLcatalogue	CEDAR_monocyte_CD14	ENSG00000243667	A	6.78461e-07	-0.0418074	0.0033923	G	+	2	68385097	WDR92	1
2:68393144:A:T	eQTLcatalogue	CEDAR_monocyte_CD14	ENSG00000243667	T	2.10672e-07	-0.0433607	0.00105336	A	+	2	68393144	WDR92	1
2:68394184:C:T	eQTLcatalogue	CEDAR_monocyte_CD14	ENSG00000243667	C	2.11516e-07	-0.0433601	0.00105758	T	+	2	68394184	WDR92	1
2:68395631:A:G	eQTLcatalogue	CEDAR_monocyte_CD14	ENSG00000243667	G	2.1162e-07	-0.0433565	0.0010581	A	+	2	68395631	WDR92	1
2:68398919:C:G	eQTLcatalogue	CEDAR_monocyte_CD14	ENSG00000243667	G	1.99992e-07	-0.0434604	0.00099996	C	+	2	68398919	WDR92	1
2:68399190:C:T	eQTLcatalogue	CEDAR_monocyte_CD14	ENSG00000243667	C	2.14424e-07	-0.0433173	0.00107212	T	+	2	68399190	WDR92	1
2:68402012:G:T	eQTLcatalogue	CEDAR_monocyte_CD14	ENSG00000243667	G	2.20654e-07	-0.043254	0.00110327	T	+	2	68402012	WDR92	1
2:68402830:C:G	eQTLcatalogue	CEDAR_monocyte_CD14	ENSG00000243667	G	2.20662e-07	-0.0432549	0.00110331	C	+	2	68402830	WDR92	1
2:68410372:A:C	eQTLcatalogue	CEDAR_monocyte_CD14	ENSG00000243667	C	1.86146e-07	-0.0436589	0.00093073	A	+	2	68410372	WDR92	1
2:68410660:G:T	eQTLcatalogue	CEDAR_monocyte_CD14	ENSG00000243667	T	1.86251e-07	-0.0436595	0.000931255	G	+	2	68410660	WDR92	1
2:68411414:A:G	eQTLcatalogue	CEDAR_monocyte_CD14	ENSG00000243667	G	1.86415e-07	-0.0436601	0.000932075	A	+	2	68411414	WDR92	1
2:68418868:A:T	eQTLcatalogue	CEDAR_monocyte_CD14	ENSG00000243667	A	1.84684e-07	-0.0437074	0.00092342	T	+	2	68418868	WDR92	1
2:68419487:A:G	eQTLcatalogue	CEDAR_monocyte_CD14	ENSG00000243667	G	1.85024e-07	-0.0437054	0.00092512	A	+	2	68419487	WDR92	1
2:68420070:G:T	eQTLcatalogue	CEDAR_monocyte_CD14	ENSG00000243667	G	1.85157e-07	-0.0437045	0.000925785	T	+	2	68420070	WDR92	1
2:68421049:A:G	eQTLcatalogue	CEDAR_monocyte_CD14	ENSG00000243667	G	1.85244e-07	-0.0437032	0.00092622	A	+	2	68421049	WDR92	1
2:68422771:A:G	eQTLcatalogue	CEDAR_monocyte_CD14	ENSG00000243667	G	1.84959e-07	-0.0437043	0.000924795	A	+	2	68422771	WDR92	1
2:68423530:A:G	eQTLcatalogue	CEDAR_monocyte_CD14	ENSG00000243667	G	1.8524e-07	-0.0437006	0.0009262	A	+	2	68423530	WDR92	1
2:68430925:C:T	eQTLcatalogue	CEDAR_monocyte_CD14	ENSG00000243667	C	1.85159e-07	-0.043634	0.000925795	T	+	2	68430925	WDR92	1
2:68431259:A:G	eQTLcatalogue	CEDAR_monocyte_CD14	ENSG00000243667	G	1.8503e-07	-0.0436318	0.00092515	A	+	2	68431259	WDR92	1
2:68433831:A:G	eQTLcatalogue	CEDAR_monocyte_CD14	ENSG00000243667	G	1.84711e-07	-0.0435984	0.000923555	A	+	2	68433831	WDR92	1
2:68435431:C:G	eQTLcatalogue	CEDAR_monocyte_CD14	ENSG00000243667	C	1.62056e-07	-0.0439692	0.00081028	G	+	2	68435431	WDR92	1
2:68438614:C:T	eQTLcatalogue	CEDAR_monocyte_CD14	ENSG00000243667	C	1.61939e-07	-0.0441519	0.000809695	T	+	2	68438614	WDR92	1
2:68439960:C:T	eQTLcatalogue	CEDAR_monocyte_CD14	ENSG00000243667	C	1.40837e-07	-0.0443521	0.000704185	T	+	2	68439960	WDR92	1
2:68443651:A:G	eQTLcatalogue	CEDAR_monocyte_CD14	ENSG00000243667	A	1.53704e-07	-0.0444398	0.00076852	G	+	2	68443651	WDR92	1
2:68443835:A:T	eQTLcatalogue	CEDAR_monocyte_CD14	ENSG00000243667	A	1.30411e-07	-0.0446646	0.000652055	T	+	2	68443835	WDR92	1
2:68446936:C:T	eQTLcatalogue	CEDAR_monocyte_CD14	ENSG00000243667	C	1.36807e-07	-0.0448397	0.000684035	T	+	2	68446936	WDR92	1
2:68457573:C:T	eQTLcatalogue	CEDAR_monocyte_CD14	ENSG00000243667	C	1.16774e-07	-0.0455038	0.00058387	T	+	2	68457573	WDR92	1
2:68457854:A:G	eQTLcatalogue	CEDAR_monocyte_CD14	ENSG00000243667	A	1.16793e-07	-0.0455107	0.000583965	G	+	2	68457854	WDR92	1
2:68463612:A:G	eQTLcatalogue	CEDAR_monocyte_CD14	ENSG00000243667	G	9.97047e-08	-0.0459555	0.000498523	A	+	2	68463612	WDR92	1
2:68467910:A:C	eQTLcatalogue	CEDAR_monocyte_CD14	ENSG00000243667	A	1.04298e-07	-0.0459104	0.00052149	C	+	2	68467910	WDR92	1
2:68475595:A:C	eQTLcatalogue	CEDAR_monocyte_CD14	ENSG00000243667	C	1.02919e-07	-0.045984	0.000514595	A	+	2	68475595	WDR92	1
2:68477248:C:T	eQTLcatalogue	CEDAR_monocyte_CD14	ENSG00000243667	T	1.15404e-07	-0.0459785	0.00057702	C	+	2	68477248	WDR92	1
2:68477248:C:T	eQTLcatalogue	CEDAR_monocyte_CD14	ENSG00000221823	T	9.15776e-06	0.188732	0.0457888	C	-	2	68477248	PPP3R1	1
2:68478919:A:G	eQTLcatalogue	CEDAR_monocyte_CD14	ENSG00000243667	A	2.00698e-07	-0.0454118	0.00100349	G	+	2	68478919	WDR92	1
2:68478919:A:G	eQTLcatalogue	CEDAR_monocyte_CD14	ENSG00000221823	A	9.43335e-06	0.18962	0.0471668	G	-	2	68478919	PPP3R1	1
11:458595:A:G	eQTLcatalogue	CEDAR_monocyte_CD14	ENSG00000023191	G	1.48959e-06	-0.112186	0.00744795	G	-	11	458595	RNH1	1
11:460765:A:G	eQTLcatalogue	CEDAR_monocyte_CD14	ENSG00000023191	A	5.9304e-07	-0.112466	0.0029652	A	-	11	460765	RNH1	1
11:462684:C:T	eQTLcatalogue	CEDAR_monocyte_CD14	ENSG00000023191	C	1.46513e-06	-0.112086	0.00732565	C	-	11	462684	RNH1	1
11:462855:A:G	eQTLcatalogue	CEDAR_monocyte_CD14	ENSG00000023191	G	5.91485e-07	-0.112472	0.00295743	G	-	11	462855	RNH1	1
11:467368:A:G	eQTLcatalogue	CEDAR_monocyte_CD14	ENSG00000023191	A	5.88258e-07	-0.11247	0.00294129	A	-	11	467368	RNH1	1
11:473300:G:T	eQTLcatalogue	CEDAR_monocyte_CD14	ENSG00000023191	G	5.81562e-07	-0.112501	0.00290781	G	-	11	473300	RNH1	1
11:477623:C:T	eQTLcatalogue	CEDAR_monocyte_CD14	ENSG00000023191	C	5.83035e-07	-0.112448	0.00291517	C	-	11	477623	RNH1	1
11:484469:C:T	eQTLcatalogue	CEDAR_monocyte_CD14	ENSG00000023191	C	4.84896e-07	-0.113771	0.00242448	C	-	11	484469	RNH1	1
11:486414:A:G	eQTLcatalogue	CEDAR_monocyte_CD14	ENSG00000023191	G	4.67516e-07	-0.1143	0.00233758	G	-	11	486414	RNH1	1
11:487101:C:T	eQTLcatalogue	CEDAR_monocyte_CD14	ENSG00000023191	C	4.18352e-07	-0.114776	0.00209176	C	-	11	487101	RNH1	1
11:487136:A:G	eQTLcatalogue	CEDAR_monocyte_CD14	ENSG00000023191	G	9.7675e-07	-0.114351	0.00488375	G	-	11	487136	RNH1	1
11:487201:C:T	eQTLcatalogue	CEDAR_monocyte_CD14	ENSG00000023191	T	4.13951e-07	-0.114839	0.00206975	T	-	11	487201	RNH1	1
11:490035:C:T	eQTLcatalogue	CEDAR_monocyte_CD14	ENSG00000023191	C	4.0049e-08	-0.148544	0.000200245	C	-	11	490035	RNH1	1
11:491334:A:C	eQTLcatalogue	CEDAR_monocyte_CD14	ENSG00000023191	A	4.99946e-08	-0.128124	0.000249973	A	-	11	491334	RNH1	1
11:494662:A:G	eQTLcatalogue	CEDAR_monocyte_CD14	ENSG00000023191	G	4.5913e-08	-0.128583	0.000229565	G	-	11	494662	RNH1	1
11:495699:A:C	eQTLcatalogue	CEDAR_monocyte_CD14	ENSG00000023191	A	4.61449e-08	-0.128434	0.000230725	A	-	11	495699	RNH1	1
11:495892:C:G	eQTLcatalogue	CEDAR_monocyte_CD14	ENSG00000023191	C	4.61984e-08	-0.128407	0.000230992	C	-	11	495892	RNH1	1
11:496193:G:T	eQTLcatalogue	CEDAR_monocyte_CD14	ENSG00000023191	T	8.01083e-08	-0.126066	0.000400542	T	-	11	496193	RNH1	1
11:501468:A:G	eQTLcatalogue	CEDAR_monocyte_CD14	ENSG00000023191	G	4.88997e-08	-0.127438	0.000244499	G	-	11	501468	RNH1	1
11:502371:A:G	eQTLcatalogue	CEDAR_monocyte_CD14	ENSG00000023191	G	4.94107e-08	-0.127297	0.000247053	G	-	11	502371	RNH1	1
11:503385:C:G	eQTLcatalogue	CEDAR_monocyte_CD14	ENSG00000023191	C	4.96376e-08	-0.127248	0.000248188	C	-	11	503385	RNH1	1
11:503710:C:T	eQTLcatalogue	CEDAR_monocyte_CD14	ENSG00000023191	C	4.96319e-08	-0.12724	0.000248159	C	-	11	503710	RNH1	1
11:504411:C:G	eQTLcatalogue	CEDAR_monocyte_CD14	ENSG00000023191	C	4.97282e-08	-0.127193	0.000248641	C	-	11	504411	RNH1	1
11:506229:C:T	eQTLcatalogue	CEDAR_monocyte_CD14	ENSG00000023191	C	5.02543e-08	-0.127076	0.000251271	C	-	11	506229	RNH1	1
11:506442:G:T	eQTLcatalogue	CEDAR_monocyte_CD14	ENSG00000023191	G	5.02795e-08	-0.127057	0.000251397	G	-	11	506442	RNH1	1
11:506596:C:T	eQTLcatalogue	CEDAR_monocyte_CD14	ENSG00000023191	C	5.02789e-08	-0.127057	0.000251395	C	-	11	506596	RNH1	1
2:238877170:C:G	eQTLcatalogue	CEDAR_neutrophil_CD15	ENSG00000184182	C	9.36552e-31	0.238041	4.68276e-27	C	+	2	238877170	UBE2F	1
2:238877409:A:C	eQTLcatalogue	CEDAR_neutrophil_CD15	ENSG00000184182	A	9.47455e-31	0.238113	4.73728e-27	A	+	2	238877409	UBE2F	1
2:238893362:C:T	eQTLcatalogue	CEDAR_neutrophil_CD15	ENSG00000184182	T	7.44623e-31	0.239926	3.72311e-27	T	+	2	238893362	UBE2F	1
2:238895507:A:G	eQTLcatalogue	CEDAR_neutrophil_CD15	ENSG00000184182	G	7.46693e-31	0.240472	3.73347e-27	G	+	2	238895507	UBE2F	1
2:238907642:A:C	eQTLcatalogue	CEDAR_neutrophil_CD15	ENSG00000184182	A	8.04726e-31	0.24268	4.02363e-27	A	+	2	238907642	UBE2F	1
2:238909269:A:G	eQTLcatalogue	CEDAR_neutrophil_CD15	ENSG00000184182	A	8.74698e-31	0.242902	4.37349e-27	A	+	2	238909269	UBE2F	1
2:238910663:C:T	eQTLcatalogue	CEDAR_neutrophil_CD15	ENSG00000184182	T	9.33183e-31	0.243063	4.66591e-27	T	+	2	238910663	UBE2F	1
2:238912120:A:C	eQTLcatalogue	CEDAR_neutrophil_CD15	ENSG00000184182	A	9.77841e-31	0.243146	4.8892e-27	A	+	2	238912120	UBE2F	1
2:238912478:A:G	eQTLcatalogue	CEDAR_neutrophil_CD15	ENSG00000184182	G	9.95723e-31	0.243232	4.97862e-27	G	+	2	238912478	UBE2F	1
2:238922585:G:T	eQTLcatalogue	CEDAR_neutrophil_CD15	ENSG00000184182	G	1.5036e-30	0.243653	7.518e-27	G	+	2	238922585	UBE2F	1
2:238930632:A:G	eQTLcatalogue	CEDAR_neutrophil_CD15	ENSG00000184182	A	4.35788e-30	0.24215	2.17894e-26	A	+	2	238930632	UBE2F	1
2:238932389:A:G	eQTLcatalogue	CEDAR_neutrophil_CD15	ENSG00000184182	G	2.38729e-30	0.243786	1.19365e-26	G	+	2	238932389	UBE2F	1
2:238939370:C:T	eQTLcatalogue	CEDAR_neutrophil_CD15	ENSG00000184182	C	2.10027e-30	0.245637	1.05014e-26	C	+	2	238939370	UBE2F	1
5:405576:A:G	eQTLcatalogue	CEDAR_neutrophil_CD15	ENSG00000180104	G	7.79139e-10	-0.0819317	3.89569e-06	A	+	5	405576	EXOC3	1
5:408529:C:T	eQTLcatalogue	CEDAR_neutrophil_CD15	ENSG00000180104	C	9.58744e-10	-0.080401	4.79372e-06	T	+	5	408529	EXOC3	1
5:410943:A:G	eQTLcatalogue	CEDAR_neutrophil_CD15	ENSG00000180104	A	9.14068e-10	-0.0803391	4.57034e-06	G	+	5	410943	EXOC3	1
5:411361:A:G	eQTLcatalogue	CEDAR_neutrophil_CD15	ENSG00000180104	G	7.60076e-10	-0.0807521	3.80038e-06	A	+	5	411361	EXOC3	1
5:412112:C:T	eQTLcatalogue	CEDAR_neutrophil_CD15	ENSG00000180104	C	6.37264e-10	-0.0812566	3.18632e-06	T	+	5	412112	EXOC3	1
5:413591:A:G	eQTLcatalogue	CEDAR_neutrophil_CD15	ENSG00000180104	G	2.70979e-10	-0.0842335	1.3549e-06	A	+	5	413591	EXOC3	1
5:416118:A:G	eQTLcatalogue	CEDAR_neutrophil_CD15	ENSG00000180104	G	1.75115e-15	-0.106728	8.75575e-12	A	+	5	416118	EXOC3	1
5:416672:A:G	eQTLcatalogue	CEDAR_neutrophil_CD15	ENSG00000180104	G	1.06758e-15	-0.107406	5.3379e-12	A	+	5	416672	EXOC3	1
5:418093:A:G	eQTLcatalogue	CEDAR_neutrophil_CD15	ENSG00000180104	A	2.62749e-11	-0.111639	1.31375e-07	G	+	5	418093	EXOC3	1
5:418494:A:G	eQTLcatalogue	CEDAR_neutrophil_CD15	ENSG00000180104	A	4.47413e-16	-0.108463	2.23707e-12	G	+	5	418494	EXOC3	1
5:421193:C:G	eQTLcatalogue	CEDAR_neutrophil_CD15	ENSG00000180104	G	1.95929e-14	-0.102775	9.79645e-11	C	+	5	421193	EXOC3	1
5:421403:A:G	eQTLcatalogue	CEDAR_neutrophil_CD15	ENSG00000180104	G	1.25093e-16	-0.110239	6.25465e-13	A	+	5	421403	EXOC3	1
5:421426:A:C	eQTLcatalogue	CEDAR_neutrophil_CD15	ENSG00000180104	A	1.50931e-11	-0.113717	7.54655e-08	C	+	5	421426	EXOC3	1
5:421455:G:T	eQTLcatalogue	CEDAR_neutrophil_CD15	ENSG00000180104	G	7.27532e-17	-0.110134	3.63766e-13	T	+	5	421455	EXOC3	1
5:422178:A:G	eQTLcatalogue	CEDAR_neutrophil_CD15	ENSG00000180104	G	6.43587e-23	-0.118878	3.21794e-19	A	+	5	422178	EXOC3	1
5:423169:C:T	eQTLcatalogue	CEDAR_neutrophil_CD15	ENSG00000180104	C	6.83954e-23	-0.118359	3.41977e-19	T	+	5	423169	EXOC3	1
5:423595:C:T	eQTLcatalogue	CEDAR_neutrophil_CD15	ENSG00000180104	C	7.8131e-23	-0.118269	3.90655e-19	T	+	5	423595	EXOC3	1
5:423671:C:T	eQTLcatalogue	CEDAR_neutrophil_CD15	ENSG00000180104	C	8.07505e-23	-0.118259	4.03753e-19	T	+	5	423671	EXOC3	1
5:423906:A:G	eQTLcatalogue	CEDAR_neutrophil_CD15	ENSG00000180104	G	8.35495e-23	-0.11825	4.17748e-19	A	+	5	423906	EXOC3	1
5:428236:A:C	eQTLcatalogue	CEDAR_neutrophil_CD15	ENSG00000180104	C	2.786e-22	-0.116587	1.393e-18	A	+	5	428236	EXOC3	1
5:429124:C:G	eQTLcatalogue	CEDAR_neutrophil_CD15	ENSG00000180104	C	2.7627e-22	-0.116602	1.38135e-18	G	+	5	429124	EXOC3	1
5:429818:C:G	eQTLcatalogue	CEDAR_neutrophil_CD15	ENSG00000180104	C	2.73813e-22	-0.116615	1.36907e-18	G	+	5	429818	EXOC3	1
5:430059:A:G	eQTLcatalogue	CEDAR_neutrophil_CD15	ENSG00000180104	G	2.73813e-22	-0.116615	1.36907e-18	A	+	5	430059	EXOC3	1
5:430217:C:T	eQTLcatalogue	CEDAR_neutrophil_CD15	ENSG00000180104	C	1.25998e-14	-0.0955821	6.2999e-11	T	+	5	430217	EXOC3	1
5:434722:C:G	eQTLcatalogue	CEDAR_neutrophil_CD15	ENSG00000180104	G	6.68826e-22	-0.114959	3.34413e-18	C	+	5	434722	EXOC3	1
5:436981:A:G	eQTLcatalogue	CEDAR_neutrophil_CD15	ENSG00000180104	A	9.7309e-19	-0.110177	4.86545e-15	G	+	5	436981	EXOC3	1
5:437542:C:T	eQTLcatalogue	CEDAR_neutrophil_CD15	ENSG00000180104	T	1.75405e-22	-0.117144	8.77025e-19	C	+	5	437542	EXOC3	1
5:437586:A:G	eQTLcatalogue	CEDAR_neutrophil_CD15	ENSG00000180104	G	1.7369e-22	-0.117154	8.6845e-19	A	+	5	437586	EXOC3	1
5:437667:A:G	eQTLcatalogue	CEDAR_neutrophil_CD15	ENSG00000180104	G	1.69838e-22	-0.117177	8.4919e-19	A	+	5	437667	EXOC3	1
5:437862:C:G	eQTLcatalogue	CEDAR_neutrophil_CD15	ENSG00000180104	G	1.59301e-22	-0.117244	7.96505e-19	C	+	5	437862	EXOC3	1
10:70884514:A:G	eQTLcatalogue	CEDAR_platelet	ENSG00000122958	A	5.72792e-09	-0.331312	2.86396e-05	G	+	10	70884514	VPS26A	1
10:70890541:C:T	eQTLcatalogue	CEDAR_platelet	ENSG00000122958	T	5.04833e-09	-0.330392	2.52416e-05	C	+	10	70890541	VPS26A	1
10:70902716:A:G	eQTLcatalogue	CEDAR_platelet	ENSG00000122958	G	1.56548e-08	-0.320598	7.8274e-05	A	+	10	70902716	VPS26A	1
10:70903844:C:G	eQTLcatalogue	CEDAR_platelet	ENSG00000122958	C	1.5586e-08	-0.320612	7.793e-05	G	+	10	70903844	VPS26A	1
10:70944798:C:T	eQTLcatalogue	CEDAR_platelet	ENSG00000122958	T	4.96501e-09	-0.328865	2.48251e-05	C	+	10	70944798	VPS26A	1
2:68385097:A:G	eQTLcatalogue	CEDAR_T-cell_CD4	ENSG00000243667	A	6.16724e-10	-0.0511707	3.08362e-06	G	+	2	68385097	WDR92	1
2:68393144:A:T	eQTLcatalogue	CEDAR_T-cell_CD4	ENSG00000243667	T	3.36578e-11	-0.0541298	1.68289e-07	A	+	2	68393144	WDR92	1
2:68394184:C:T	eQTLcatalogue	CEDAR_T-cell_CD4	ENSG00000243667	C	3.33948e-11	-0.0541391	1.66974e-07	T	+	2	68394184	WDR92	1
2:68395631:A:G	eQTLcatalogue	CEDAR_T-cell_CD4	ENSG00000243667	G	3.33121e-11	-0.0541325	1.66561e-07	A	+	2	68395631	WDR92	1
2:68398919:C:G	eQTLcatalogue	CEDAR_T-cell_CD4	ENSG00000243667	G	2.79552e-11	-0.054429	1.39776e-07	C	+	2	68398919	WDR92	1
2:68399190:C:T	eQTLcatalogue	CEDAR_T-cell_CD4	ENSG00000243667	C	2.70521e-11	-0.0544155	1.3526e-07	T	+	2	68399190	WDR92	1
2:68402012:G:T	eQTLcatalogue	CEDAR_T-cell_CD4	ENSG00000243667	G	2.74275e-11	-0.054358	1.37138e-07	T	+	2	68402012	WDR92	1
2:68402830:C:G	eQTLcatalogue	CEDAR_T-cell_CD4	ENSG00000243667	G	2.7426e-11	-0.0543597	1.3713e-07	C	+	2	68402830	WDR92	1
2:68410372:A:C	eQTLcatalogue	CEDAR_T-cell_CD4	ENSG00000243667	C	1.15365e-11	-0.0554997	5.76825e-08	A	+	2	68410372	WDR92	1
2:68410660:G:T	eQTLcatalogue	CEDAR_T-cell_CD4	ENSG00000243667	T	1.1534e-11	-0.0555018	5.767e-08	G	+	2	68410660	WDR92	1
2:68411414:A:G	eQTLcatalogue	CEDAR_T-cell_CD4	ENSG00000243667	G	1.15245e-11	-0.0555044	5.76225e-08	A	+	2	68411414	WDR92	1
2:68418868:A:T	eQTLcatalogue	CEDAR_T-cell_CD4	ENSG00000243667	A	1.15159e-11	-0.0555499	5.75795e-08	T	+	2	68418868	WDR92	1
2:68419487:A:G	eQTLcatalogue	CEDAR_T-cell_CD4	ENSG00000243667	G	1.15186e-11	-0.0555504	5.7593e-08	A	+	2	68419487	WDR92	1
2:68420070:G:T	eQTLcatalogue	CEDAR_T-cell_CD4	ENSG00000243667	G	1.15178e-11	-0.0555507	5.7589e-08	T	+	2	68420070	WDR92	1
2:68421049:A:G	eQTLcatalogue	CEDAR_T-cell_CD4	ENSG00000243667	G	1.15063e-11	-0.0555511	5.75315e-08	A	+	2	68421049	WDR92	1
2:68422771:A:G	eQTLcatalogue	CEDAR_T-cell_CD4	ENSG00000243667	G	1.14984e-11	-0.0555501	5.7492e-08	A	+	2	68422771	WDR92	1
2:68423530:A:G	eQTLcatalogue	CEDAR_T-cell_CD4	ENSG00000243667	G	1.15008e-11	-0.0555483	5.7504e-08	A	+	2	68423530	WDR92	1
2:68430925:C:T	eQTLcatalogue	CEDAR_T-cell_CD4	ENSG00000243667	C	1.12243e-11	-0.0554876	5.61215e-08	T	+	2	68430925	WDR92	1
2:68431259:A:G	eQTLcatalogue	CEDAR_T-cell_CD4	ENSG00000243667	G	1.12412e-11	-0.0554815	5.6206e-08	A	+	2	68431259	WDR92	1
2:68433831:A:G	eQTLcatalogue	CEDAR_T-cell_CD4	ENSG00000243667	G	1.1312e-11	-0.0554269	5.656e-08	A	+	2	68433831	WDR92	1
2:68435431:C:G	eQTLcatalogue	CEDAR_T-cell_CD4	ENSG00000243667	C	1.55224e-11	-0.0552948	7.7612e-08	G	+	2	68435431	WDR92	1
2:68438614:C:T	eQTLcatalogue	CEDAR_T-cell_CD4	ENSG00000243667	C	9.15133e-12	-0.0561203	4.57567e-08	T	+	2	68438614	WDR92	1
2:68439960:C:T	eQTLcatalogue	CEDAR_T-cell_CD4	ENSG00000243667	C	1.14282e-11	-0.0558721	5.7141e-08	T	+	2	68439960	WDR92	1
2:68443651:A:G	eQTLcatalogue	CEDAR_T-cell_CD4	ENSG00000243667	A	1.16923e-11	-0.0561253	5.84615e-08	G	+	2	68443651	WDR92	1
2:68443835:A:T	eQTLcatalogue	CEDAR_T-cell_CD4	ENSG00000243667	A	1.02105e-11	-0.0562513	5.10525e-08	T	+	2	68443835	WDR92	1
2:68446936:C:T	eQTLcatalogue	CEDAR_T-cell_CD4	ENSG00000243667	C	7.51461e-12	-0.0568972	3.75731e-08	T	+	2	68446936	WDR92	1
2:68457573:C:T	eQTLcatalogue	CEDAR_T-cell_CD4	ENSG00000243667	C	5.34984e-12	-0.0578354	2.67492e-08	T	+	2	68457573	WDR92	1
2:68457854:A:G	eQTLcatalogue	CEDAR_T-cell_CD4	ENSG00000243667	A	5.31931e-12	-0.0578512	2.65965e-08	G	+	2	68457854	WDR92	1
2:68463612:A:G	eQTLcatalogue	CEDAR_T-cell_CD4	ENSG00000243667	G	5.96678e-12	-0.0580557	2.98339e-08	A	+	2	68463612	WDR92	1
2:68467910:A:C	eQTLcatalogue	CEDAR_T-cell_CD4	ENSG00000243667	A	4.5343e-12	-0.0583425	2.26715e-08	C	+	2	68467910	WDR92	1
2:68475595:A:C	eQTLcatalogue	CEDAR_T-cell_CD4	ENSG00000243667	C	4.2347e-12	-0.0585069	2.11735e-08	A	+	2	68475595	WDR92	1
2:68477248:C:T	eQTLcatalogue	CEDAR_T-cell_CD4	ENSG00000243667	T	3.8804e-12	-0.0588277	1.9402e-08	C	+	2	68477248	WDR92	1
2:68478919:A:G	eQTLcatalogue	CEDAR_T-cell_CD4	ENSG00000243667	A	3.46064e-12	-0.0592842	1.73032e-08	G	+	2	68478919	WDR92	1
2:238877170:C:G	eQTLcatalogue	CEDAR_T-cell_CD4	ENSG00000184182	C	9.66618e-10	0.0892374	4.83309e-06	C	+	2	238877170	UBE2F	1
2:238877409:A:C	eQTLcatalogue	CEDAR_T-cell_CD4	ENSG00000184182	A	9.48721e-10	0.0893099	4.7436e-06	A	+	2	238877409	UBE2F	1
2:238893362:C:T	eQTLcatalogue	CEDAR_T-cell_CD4	ENSG00000184182	T	1.0316e-09	0.0897167	5.158e-06	T	+	2	238893362	UBE2F	1
2:238895507:A:G	eQTLcatalogue	CEDAR_T-cell_CD4	ENSG00000184182	G	1.05488e-09	0.0898818	5.2744e-06	G	+	2	238895507	UBE2F	1
2:238907642:A:C	eQTLcatalogue	CEDAR_T-cell_CD4	ENSG00000184182	A	1.14179e-09	0.0906013	5.70895e-06	A	+	2	238907642	UBE2F	1
2:238909269:A:G	eQTLcatalogue	CEDAR_T-cell_CD4	ENSG00000184182	A	1.14024e-09	0.0907393	5.7012e-06	A	+	2	238909269	UBE2F	1
2:238910663:C:T	eQTLcatalogue	CEDAR_T-cell_CD4	ENSG00000184182	T	1.13898e-09	0.0908401	5.6949e-06	T	+	2	238910663	UBE2F	1
2:238912120:A:C	eQTLcatalogue	CEDAR_T-cell_CD4	ENSG00000184182	A	1.14065e-09	0.0908962	5.70325e-06	A	+	2	238912120	UBE2F	1
2:238912478:A:G	eQTLcatalogue	CEDAR_T-cell_CD4	ENSG00000184182	G	1.1373e-09	0.0909456	5.6865e-06	G	+	2	238912478	UBE2F	1
2:238922585:G:T	eQTLcatalogue	CEDAR_T-cell_CD4	ENSG00000184182	G	1.13606e-09	0.0913513	5.6803e-06	G	+	2	238922585	UBE2F	1
2:238930632:A:G	eQTLcatalogue	CEDAR_T-cell_CD4	ENSG00000184182	A	2.25897e-09	0.0898555	1.12948e-05	A	+	2	238930632	UBE2F	1
2:238932389:A:G	eQTLcatalogue	CEDAR_T-cell_CD4	ENSG00000184182	G	1.17073e-09	0.0916091	5.85365e-06	G	+	2	238932389	UBE2F	1
2:238939370:C:T	eQTLcatalogue	CEDAR_T-cell_CD4	ENSG00000184182	C	2.53383e-09	0.0893106	1.26691e-05	C	+	2	238939370	UBE2F	1
3:153992586:A:G	eQTLcatalogue	CEDAR_T-cell_CD4	ENSG00000174953	A	2.12468e-11	-0.112011	1.06234e-07	G	+	3	153992586	DHX36	1
3:154004009:C:T	eQTLcatalogue	CEDAR_T-cell_CD4	ENSG00000174953	T	1.01317e-11	-0.113825	5.06585e-08	C	+	3	154004009	DHX36	1
3:154009933:C:T	eQTLcatalogue	CEDAR_T-cell_CD4	ENSG00000174953	T	2.15403e-11	-0.112008	1.07701e-07	C	+	3	154009933	DHX36	1
3:154036196:A:G	eQTLcatalogue	CEDAR_T-cell_CD4	ENSG00000174953	A	2.32353e-11	-0.111958	1.16176e-07	G	+	3	154036196	DHX36	1
3:154036657:C:T	eQTLcatalogue	CEDAR_T-cell_CD4	ENSG00000174953	C	2.33701e-11	-0.11199	1.1685e-07	T	+	3	154036657	DHX36	1
3:154040273:A:G	eQTLcatalogue	CEDAR_T-cell_CD4	ENSG00000174953	G	2.35378e-11	-0.111939	1.17689e-07	A	+	3	154040273	DHX36	1
7:44157825:C:T	eQTLcatalogue	CEDAR_T-cell_CD4	ENSG00000105953	T	2.00387e-06	0.0457619	0.0100193	T	+	7	44157825	OGDH	1
10:70730197:C:G	eQTLcatalogue	CEDAR_T-cell_CD4	ENSG00000165730	C	1.39727e-13	0.144858	6.98635e-10	G	-	10	70730197	STOX1	1
10:70730197:C:G	eQTLcatalogue	CEDAR_T-cell_CD4	ENSG00000165730	C	5.64051e-13	0.168076	2.82025e-09	G	-	10	70730197	STOX1	1
10:70733935:C:T	eQTLcatalogue	CEDAR_T-cell_CD4	ENSG00000165730	C	1.59432e-13	0.144578	7.9716e-10	T	-	10	70733935	STOX1	1
10:70733935:C:T	eQTLcatalogue	CEDAR_T-cell_CD4	ENSG00000165730	C	5.96183e-13	0.167952	2.98092e-09	T	-	10	70733935	STOX1	1
10:70736879:A:C	eQTLcatalogue	CEDAR_T-cell_CD4	ENSG00000165730	A	1.84679e-13	0.144289	9.23395e-10	C	-	10	70736879	STOX1	1
10:70736879:A:C	eQTLcatalogue	CEDAR_T-cell_CD4	ENSG00000165730	A	6.41909e-13	0.167807	3.20955e-09	C	-	10	70736879	STOX1	1
10:70737972:C:T	eQTLcatalogue	CEDAR_T-cell_CD4	ENSG00000165730	T	1.93989e-13	0.144184	9.69945e-10	C	-	10	70737972	STOX1	1
10:70737972:C:T	eQTLcatalogue	CEDAR_T-cell_CD4	ENSG00000165730	T	6.58794e-13	0.167746	3.29397e-09	C	-	10	70737972	STOX1	1
10:70740091:A:G	eQTLcatalogue	CEDAR_T-cell_CD4	ENSG00000165730	G	2.16581e-13	0.143947	1.0829e-09	A	-	10	70740091	STOX1	1
10:70740091:A:G	eQTLcatalogue	CEDAR_T-cell_CD4	ENSG00000165730	G	6.98483e-13	0.167605	3.49241e-09	A	-	10	70740091	STOX1	1
10:126679510:A:G	eQTLcatalogue	CEDAR_T-cell_CD4	ENSG00000019995	A	2.4967e-06	0.0921956	0.0124835	A	+	10	126679510	ZRANB1	1
11:490035:C:T	eQTLcatalogue	CEDAR_T-cell_CD4	ENSG00000023191	C	1.95536e-07	-0.109357	0.00097768	C	-	11	490035	RNH1	1
11:491334:A:C	eQTLcatalogue	CEDAR_T-cell_CD4	ENSG00000023191	A	9.81617e-06	-0.0795079	0.0490808	A	-	11	491334	RNH1	1
11:494662:A:G	eQTLcatalogue	CEDAR_T-cell_CD4	ENSG00000023191	G	9.94922e-06	-0.0795269	0.0497461	G	-	11	494662	RNH1	1
11:495699:A:C	eQTLcatalogue	CEDAR_T-cell_CD4	ENSG00000023191	A	9.85414e-06	-0.0794859	0.0492707	A	-	11	495699	RNH1	1
11:495892:C:G	eQTLcatalogue	CEDAR_T-cell_CD4	ENSG00000023191	C	9.84129e-06	-0.0794776	0.0492064	C	-	11	495892	RNH1	1
11:496193:G:T	eQTLcatalogue	CEDAR_T-cell_CD4	ENSG00000023191	T	7.35429e-06	-0.0804677	0.0367714	T	-	11	496193	RNH1	1
11:501468:A:G	eQTLcatalogue	CEDAR_T-cell_CD4	ENSG00000023191	G	9.59182e-06	-0.0791285	0.0479591	G	-	11	501468	RNH1	1
11:502371:A:G	eQTLcatalogue	CEDAR_T-cell_CD4	ENSG00000023191	G	9.56023e-06	-0.0790806	0.0478012	G	-	11	502371	RNH1	1
11:503385:C:G	eQTLcatalogue	CEDAR_T-cell_CD4	ENSG00000023191	C	9.62614e-06	-0.0790363	0.0481307	C	-	11	503385	RNH1	1
11:503710:C:T	eQTLcatalogue	CEDAR_T-cell_CD4	ENSG00000023191	C	9.62608e-06	-0.0790339	0.0481304	C	-	11	503710	RNH1	1
11:504411:C:G	eQTLcatalogue	CEDAR_T-cell_CD4	ENSG00000023191	C	9.65581e-06	-0.0789989	0.0482791	C	-	11	504411	RNH1	1
11:506229:C:T	eQTLcatalogue	CEDAR_T-cell_CD4	ENSG00000023191	C	9.6882e-06	-0.0789411	0.048441	C	-	11	506229	RNH1	1
11:506442:G:T	eQTLcatalogue	CEDAR_T-cell_CD4	ENSG00000023191	G	9.72432e-06	-0.0789167	0.0486216	G	-	11	506442	RNH1	1
11:506596:C:T	eQTLcatalogue	CEDAR_T-cell_CD4	ENSG00000023191	C	9.73065e-06	-0.0789144	0.0486533	C	-	11	506596	RNH1	1
2:68385097:A:G	eQTLcatalogue	CEDAR_T-cell_CD8	ENSG00000243667	A	6.67847e-10	-0.054291	3.33924e-06	G	+	2	68385097	WDR92	1
2:68385097:A:G	eQTLcatalogue	CEDAR_T-cell_CD8	ENSG00000221823	A	4.46366e-06	0.15646	0.0223183	G	-	2	68385097	PPP3R1	1
2:68393144:A:T	eQTLcatalogue	CEDAR_T-cell_CD8	ENSG00000243667	T	5.17165e-10	-0.0541843	2.58582e-06	A	+	2	68393144	WDR92	1
2:68394184:C:T	eQTLcatalogue	CEDAR_T-cell_CD8	ENSG00000243667	C	5.26767e-10	-0.0541625	2.63383e-06	T	+	2	68394184	WDR92	1
2:68395631:A:G	eQTLcatalogue	CEDAR_T-cell_CD8	ENSG00000243667	G	5.39837e-10	-0.0541217	2.69918e-06	A	+	2	68395631	WDR92	1
2:68398919:C:G	eQTLcatalogue	CEDAR_T-cell_CD8	ENSG00000243667	G	1.06999e-09	-0.0533352	5.34995e-06	C	+	2	68398919	WDR92	1
2:68399190:C:T	eQTLcatalogue	CEDAR_T-cell_CD8	ENSG00000243667	C	1.11335e-09	-0.053236	5.56675e-06	T	+	2	68399190	WDR92	1
2:68402012:G:T	eQTLcatalogue	CEDAR_T-cell_CD8	ENSG00000243667	G	1.19132e-09	-0.0531072	5.9566e-06	T	+	2	68402012	WDR92	1
2:68402830:C:G	eQTLcatalogue	CEDAR_T-cell_CD8	ENSG00000243667	G	1.1908e-09	-0.0531093	5.954e-06	C	+	2	68402830	WDR92	1
2:68410372:A:C	eQTLcatalogue	CEDAR_T-cell_CD8	ENSG00000243667	C	4.13964e-10	-0.0546506	2.06982e-06	A	+	2	68410372	WDR92	1
2:68410660:G:T	eQTLcatalogue	CEDAR_T-cell_CD8	ENSG00000243667	T	4.1445e-10	-0.0546508	2.07225e-06	G	+	2	68410660	WDR92	1
2:68411414:A:G	eQTLcatalogue	CEDAR_T-cell_CD8	ENSG00000243667	G	4.14577e-10	-0.0546528	2.07288e-06	A	+	2	68411414	WDR92	1
2:68418868:A:T	eQTLcatalogue	CEDAR_T-cell_CD8	ENSG00000243667	A	4.13164e-10	-0.0546996	2.06582e-06	T	+	2	68418868	WDR92	1
2:68419487:A:G	eQTLcatalogue	CEDAR_T-cell_CD8	ENSG00000243667	G	4.13126e-10	-0.0547006	2.06563e-06	A	+	2	68419487	WDR92	1
2:68420070:G:T	eQTLcatalogue	CEDAR_T-cell_CD8	ENSG00000243667	G	4.132e-10	-0.0547005	2.066e-06	T	+	2	68420070	WDR92	1
2:68421049:A:G	eQTLcatalogue	CEDAR_T-cell_CD8	ENSG00000243667	G	4.1339e-10	-0.0546993	2.06695e-06	A	+	2	68421049	WDR92	1
2:68422771:A:G	eQTLcatalogue	CEDAR_T-cell_CD8	ENSG00000243667	G	4.14116e-10	-0.0546954	2.07058e-06	A	+	2	68422771	WDR92	1
2:68423530:A:G	eQTLcatalogue	CEDAR_T-cell_CD8	ENSG00000243667	G	4.14057e-10	-0.0546938	2.07029e-06	A	+	2	68423530	WDR92	1
2:68430925:C:T	eQTLcatalogue	CEDAR_T-cell_CD8	ENSG00000243667	C	4.13721e-10	-0.0546108	2.0686e-06	T	+	2	68430925	WDR92	1
2:68431259:A:G	eQTLcatalogue	CEDAR_T-cell_CD8	ENSG00000243667	G	4.14267e-10	-0.0546046	2.07133e-06	A	+	2	68431259	WDR92	1
2:68433831:A:G	eQTLcatalogue	CEDAR_T-cell_CD8	ENSG00000243667	G	4.14694e-10	-0.054558	2.07347e-06	A	+	2	68433831	WDR92	1
2:68435431:C:G	eQTLcatalogue	CEDAR_T-cell_CD8	ENSG00000243667	C	2.75362e-10	-0.0552995	1.37681e-06	G	+	2	68435431	WDR92	1
2:68438614:C:T	eQTLcatalogue	CEDAR_T-cell_CD8	ENSG00000243667	C	4.43292e-10	-0.0548999	2.21646e-06	T	+	2	68438614	WDR92	1
2:68439960:C:T	eQTLcatalogue	CEDAR_T-cell_CD8	ENSG00000243667	C	5.16543e-10	-0.0547541	2.58272e-06	T	+	2	68439960	WDR92	1
2:68443651:A:G	eQTLcatalogue	CEDAR_T-cell_CD8	ENSG00000243667	A	6.06503e-10	-0.0548061	3.03252e-06	G	+	2	68443651	WDR92	1
2:68443835:A:T	eQTLcatalogue	CEDAR_T-cell_CD8	ENSG00000243667	A	5.4307e-10	-0.0549259	2.71535e-06	T	+	2	68443835	WDR92	1
2:68446936:C:T	eQTLcatalogue	CEDAR_T-cell_CD8	ENSG00000243667	C	5.00921e-10	-0.0552222	2.50461e-06	T	+	2	68446936	WDR92	1
2:68457573:C:T	eQTLcatalogue	CEDAR_T-cell_CD8	ENSG00000243667	C	6.54887e-10	-0.0554026	3.27443e-06	T	+	2	68457573	WDR92	1
2:68457854:A:G	eQTLcatalogue	CEDAR_T-cell_CD8	ENSG00000243667	A	6.54712e-10	-0.0554116	3.27356e-06	G	+	2	68457854	WDR92	1
2:68463612:A:G	eQTLcatalogue	CEDAR_T-cell_CD8	ENSG00000243667	G	7.82581e-10	-0.0554607	3.9129e-06	A	+	2	68463612	WDR92	1
2:68467910:A:C	eQTLcatalogue	CEDAR_T-cell_CD8	ENSG00000243667	A	8.80424e-10	-0.0552802	4.40212e-06	C	+	2	68467910	WDR92	1
2:68475595:A:C	eQTLcatalogue	CEDAR_T-cell_CD8	ENSG00000243667	C	1.15644e-09	-0.0549725	5.7822e-06	A	+	2	68475595	WDR92	1
2:68477248:C:T	eQTLcatalogue	CEDAR_T-cell_CD8	ENSG00000243667	T	1.10971e-09	-0.0552203	5.54855e-06	C	+	2	68477248	WDR92	1
2:68478919:A:G	eQTLcatalogue	CEDAR_T-cell_CD8	ENSG00000243667	A	1.66681e-09	-0.0549657	8.33405e-06	G	+	2	68478919	WDR92	1
3:153992586:A:G	eQTLcatalogue	CEDAR_T-cell_CD8	ENSG00000174953	A	1.91004e-06	-0.0897969	0.0095502	G	+	3	153992586	DHX36	1
3:154004009:C:T	eQTLcatalogue	CEDAR_T-cell_CD8	ENSG00000174953	T	1.0288e-06	-0.092146	0.005144	C	+	3	154004009	DHX36	1
3:154009933:C:T	eQTLcatalogue	CEDAR_T-cell_CD8	ENSG00000174953	T	1.92126e-06	-0.0897964	0.0096063	C	+	3	154009933	DHX36	1
3:154036196:A:G	eQTLcatalogue	CEDAR_T-cell_CD8	ENSG00000174953	A	1.98178e-06	-0.0897756	0.0099089	G	+	3	154036196	DHX36	1
3:154036657:C:T	eQTLcatalogue	CEDAR_T-cell_CD8	ENSG00000174953	C	1.98551e-06	-0.0897947	0.00992755	T	+	3	154036657	DHX36	1
3:154040273:A:G	eQTLcatalogue	CEDAR_T-cell_CD8	ENSG00000174953	G	1.99235e-06	-0.0897658	0.00996175	A	+	3	154040273	DHX36	1
10:70730197:C:G	eQTLcatalogue	CEDAR_T-cell_CD8	ENSG00000165730	C	6.93158e-08	0.0928478	0.000346579	G	-	10	70730197	STOX1	1
10:70730197:C:G	eQTLcatalogue	CEDAR_T-cell_CD8	ENSG00000165730	C	3.95476e-14	0.148848	1.97738e-10	G	-	10	70730197	STOX1	1
10:70733935:C:T	eQTLcatalogue	CEDAR_T-cell_CD8	ENSG00000165730	C	7.83366e-08	0.0925072	0.000391683	T	-	10	70733935	STOX1	1
10:70733935:C:T	eQTLcatalogue	CEDAR_T-cell_CD8	ENSG00000165730	C	4.31588e-14	0.148677	2.15794e-10	T	-	10	70733935	STOX1	1
10:70736879:A:C	eQTLcatalogue	CEDAR_T-cell_CD8	ENSG00000165730	A	8.91853e-08	0.0921578	0.000445927	C	-	10	70736879	STOX1	1
10:70736879:A:C	eQTLcatalogue	CEDAR_T-cell_CD8	ENSG00000165730	A	4.75194e-14	0.148508	2.37597e-10	C	-	10	70736879	STOX1	1
10:70737972:C:T	eQTLcatalogue	CEDAR_T-cell_CD8	ENSG00000165730	T	9.32396e-08	0.092032	0.000466198	C	-	10	70737972	STOX1	1
10:70737972:C:T	eQTLcatalogue	CEDAR_T-cell_CD8	ENSG00000165730	T	4.91722e-14	0.148439	2.45861e-10	C	-	10	70737972	STOX1	1
10:70740091:A:G	eQTLcatalogue	CEDAR_T-cell_CD8	ENSG00000165730	G	1.02956e-07	0.0917516	0.00051478	A	-	10	70740091	STOX1	1
10:70740091:A:G	eQTLcatalogue	CEDAR_T-cell_CD8	ENSG00000165730	G	5.30946e-14	0.148284	2.65473e-10	A	-	10	70740091	STOX1	1
10:126679510:A:G	eQTLcatalogue	CEDAR_T-cell_CD8	ENSG00000019995	A	2.23553e-08	0.14345	0.000111776	A	+	10	126679510	ZRANB1	1
10:126685539:A:G	eQTLcatalogue	CEDAR_T-cell_CD8	ENSG00000019995	G	1.67765e-08	0.138349	8.38825e-05	G	+	10	126685539	ZRANB1	1
10:126687613:C:T	eQTLcatalogue	CEDAR_T-cell_CD8	ENSG00000019995	T	1.64573e-08	0.139482	8.22865e-05	T	+	10	126687613	ZRANB1	1
10:126711259:A:G	eQTLcatalogue	CEDAR_T-cell_CD8	ENSG00000019995	A	3.05055e-06	0.111711	0.0152527	A	+	10	126711259	ZRANB1	1
10:126713026:A:G	eQTLcatalogue	CEDAR_T-cell_CD8	ENSG00000019995	A	2.65238e-06	0.112876	0.0132619	A	+	10	126713026	ZRANB1	1
10:126714169:C:T	eQTLcatalogue	CEDAR_T-cell_CD8	ENSG00000019995	C	4.78598e-06	0.110146	0.0239299	C	+	10	126714169	ZRANB1	1
10:126718244:C:T	eQTLcatalogue	CEDAR_T-cell_CD8	ENSG00000019995	C	2.75253e-06	0.113329	0.0137626	C	+	10	126718244	ZRANB1	1
10:126721819:A:C	eQTLcatalogue	CEDAR_T-cell_CD8	ENSG00000019995	C	3.45911e-06	0.112472	0.0172955	C	+	10	126721819	ZRANB1	1
10:126722149:C:G	eQTLcatalogue	CEDAR_T-cell_CD8	ENSG00000019995	C	3.53103e-06	0.112373	0.0176552	C	+	10	126722149	ZRANB1	1
10:126722453:C:T	eQTLcatalogue	CEDAR_T-cell_CD8	ENSG00000019995	C	3.62618e-06	0.112238	0.0181309	C	+	10	126722453	ZRANB1	1
10:126723939:A:G	eQTLcatalogue	CEDAR_T-cell_CD8	ENSG00000019995	G	4.65048e-06	0.111061	0.0232524	G	+	10	126723939	ZRANB1	1
10:126726979:C:T	eQTLcatalogue	CEDAR_T-cell_CD8	ENSG00000019995	C	5.23108e-06	0.109738	0.0261554	C	+	10	126726979	ZRANB1	1
10:126727268:A:C	eQTLcatalogue	CEDAR_T-cell_CD8	ENSG00000019995	A	5.26138e-06	0.10969	0.0263069	A	+	10	126727268	ZRANB1	1
10:126730827:A:G	eQTLcatalogue	CEDAR_T-cell_CD8	ENSG00000019995	A	2.18496e-06	0.113218	0.0109248	A	+	10	126730827	ZRANB1	1
10:126733276:C:T	eQTLcatalogue	CEDAR_T-cell_CD8	ENSG00000019995	C	1.29684e-06	0.114787	0.0064842	C	+	10	126733276	ZRANB1	1
10:126737566:C:G	eQTLcatalogue	CEDAR_T-cell_CD8	ENSG00000019995	G	5.03124e-07	0.121661	0.00251562	G	+	10	126737566	ZRANB1	1
14:74480794:C:G	eQTLcatalogue	CEDAR_transverse_colon	ENSG00000187097	G	3.84338e-11	0.18719	1.92169e-07	C	-	14	74480794	ENTPD5	1
14:74480794:C:G	eQTLcatalogue	CEDAR_transverse_colon	ENSG00000119723	G	1.32962e-08	-0.0991537	6.6481e-05	C	+	14	74480794	COQ6	1
14:74485133:C:T	eQTLcatalogue	CEDAR_transverse_colon	ENSG00000187097	C	3.88784e-11	0.186977	1.94392e-07	T	-	14	74485133	ENTPD5	1
14:74485133:C:T	eQTLcatalogue	CEDAR_transverse_colon	ENSG00000119723	C	1.54099e-08	-0.0986481	7.70495e-05	T	+	14	74485133	COQ6	1
2:68385097:A:G	eQTLcatalogue	Fairfax_2012_B-cell_CD19	ENSG00000243667	A	8.9922e-08	-0.0634157	0.00044961	G	+	2	68385097	WDR92	1
2:68385097:A:G	eQTLcatalogue	Fairfax_2012_B-cell_CD19	ENSG00000221823	A	1.01089e-23	0.146489	5.05445e-20	G	-	2	68385097	PPP3R1	1
2:68393144:A:T	eQTLcatalogue	Fairfax_2012_B-cell_CD19	ENSG00000243667	T	2.61699e-07	-0.061781	0.0013085	A	+	2	68393144	WDR92	1
2:68393144:A:T	eQTLcatalogue	Fairfax_2012_B-cell_CD19	ENSG00000221823	T	6.45391e-26	0.153776	3.22695e-22	A	-	2	68393144	PPP3R1	1
2:68394184:C:T	eQTLcatalogue	Fairfax_2012_B-cell_CD19	ENSG00000243667	C	2.57642e-07	-0.0617734	0.00128821	T	+	2	68394184	WDR92	1
2:68394184:C:T	eQTLcatalogue	Fairfax_2012_B-cell_CD19	ENSG00000221823	C	6.38599e-26	0.153685	3.193e-22	T	-	2	68394184	PPP3R1	1
2:68395631:A:G	eQTLcatalogue	Fairfax_2012_B-cell_CD19	ENSG00000243667	G	2.53288e-07	-0.0617499	0.00126644	A	+	2	68395631	WDR92	1
2:68395631:A:G	eQTLcatalogue	Fairfax_2012_B-cell_CD19	ENSG00000221823	G	6.50289e-26	0.153516	3.25144e-22	A	-	2	68395631	PPP3R1	1
2:68398919:C:G	eQTLcatalogue	Fairfax_2012_B-cell_CD19	ENSG00000243667	G	2.48019e-07	-0.061781	0.00124009	C	+	2	68398919	WDR92	1
2:68398919:C:G	eQTLcatalogue	Fairfax_2012_B-cell_CD19	ENSG00000221823	G	7.68129e-26	0.153295	3.84064e-22	C	-	2	68398919	PPP3R1	1
2:68399190:C:T	eQTLcatalogue	Fairfax_2012_B-cell_CD19	ENSG00000243667	C	2.4539e-07	-0.061651	0.00122695	T	+	2	68399190	WDR92	1
2:68399190:C:T	eQTLcatalogue	Fairfax_2012_B-cell_CD19	ENSG00000221823	C	6.94438e-26	0.153029	3.47219e-22	T	-	2	68399190	PPP3R1	1
2:68402012:G:T	eQTLcatalogue	Fairfax_2012_B-cell_CD19	ENSG00000243667	G	2.40687e-07	-0.0615332	0.00120343	T	+	2	68402012	WDR92	1
2:68402012:G:T	eQTLcatalogue	Fairfax_2012_B-cell_CD19	ENSG00000221823	G	7.71384e-26	0.152517	3.85692e-22	T	-	2	68402012	PPP3R1	1
2:68402830:C:G	eQTLcatalogue	Fairfax_2012_B-cell_CD19	ENSG00000243667	G	2.40949e-07	-0.0615334	0.00120474	C	+	2	68402830	WDR92	1
2:68402830:C:G	eQTLcatalogue	Fairfax_2012_B-cell_CD19	ENSG00000221823	G	7.67989e-26	0.152528	3.83994e-22	C	-	2	68402830	PPP3R1	1
2:68410372:A:C	eQTLcatalogue	Fairfax_2012_B-cell_CD19	ENSG00000243667	C	2.39974e-07	-0.0616306	0.00119987	A	+	2	68410372	WDR92	1
2:68410372:A:C	eQTLcatalogue	Fairfax_2012_B-cell_CD19	ENSG00000221823	C	7.33292e-26	0.152799	3.66646e-22	A	-	2	68410372	PPP3R1	1
2:68410660:G:T	eQTLcatalogue	Fairfax_2012_B-cell_CD19	ENSG00000243667	T	2.40268e-07	-0.0616291	0.00120134	G	+	2	68410660	WDR92	1
2:68410660:G:T	eQTLcatalogue	Fairfax_2012_B-cell_CD19	ENSG00000221823	T	7.29556e-26	0.152808	3.64778e-22	G	-	2	68410660	PPP3R1	1
2:68411414:A:G	eQTLcatalogue	Fairfax_2012_B-cell_CD19	ENSG00000243667	G	2.40609e-07	-0.0616273	0.00120305	A	+	2	68411414	WDR92	1
2:68411414:A:G	eQTLcatalogue	Fairfax_2012_B-cell_CD19	ENSG00000221823	G	7.33133e-26	0.152806	3.66567e-22	A	-	2	68411414	PPP3R1	1
2:68418868:A:T	eQTLcatalogue	Fairfax_2012_B-cell_CD19	ENSG00000243667	A	2.39815e-07	-0.0616739	0.00119907	T	+	2	68418868	WDR92	1
2:68418868:A:T	eQTLcatalogue	Fairfax_2012_B-cell_CD19	ENSG00000221823	A	7.24867e-26	0.152916	3.62434e-22	T	-	2	68418868	PPP3R1	1
2:68419487:A:G	eQTLcatalogue	Fairfax_2012_B-cell_CD19	ENSG00000243667	G	2.40222e-07	-0.0616709	0.00120111	A	+	2	68419487	WDR92	1
2:68419487:A:G	eQTLcatalogue	Fairfax_2012_B-cell_CD19	ENSG00000221823	G	7.20042e-26	0.152925	3.60021e-22	A	-	2	68419487	PPP3R1	1
2:68420070:G:T	eQTLcatalogue	Fairfax_2012_B-cell_CD19	ENSG00000243667	G	2.40391e-07	-0.0616699	0.00120196	T	+	2	68420070	WDR92	1
2:68420070:G:T	eQTLcatalogue	Fairfax_2012_B-cell_CD19	ENSG00000221823	G	7.20885e-26	0.152925	3.60443e-22	T	-	2	68420070	PPP3R1	1
2:68421049:A:G	eQTLcatalogue	Fairfax_2012_B-cell_CD19	ENSG00000243667	G	2.40355e-07	-0.0616701	0.00120177	A	+	2	68421049	WDR92	1
2:68421049:A:G	eQTLcatalogue	Fairfax_2012_B-cell_CD19	ENSG00000221823	G	7.21342e-26	0.152924	3.60671e-22	A	-	2	68421049	PPP3R1	1
2:68422771:A:G	eQTLcatalogue	Fairfax_2012_B-cell_CD19	ENSG00000243667	G	2.40103e-07	-0.0616716	0.00120052	A	+	2	68422771	WDR92	1
2:68422771:A:G	eQTLcatalogue	Fairfax_2012_B-cell_CD19	ENSG00000221823	G	7.25402e-26	0.152916	3.62701e-22	A	-	2	68422771	PPP3R1	1
2:68423530:A:G	eQTLcatalogue	Fairfax_2012_B-cell_CD19	ENSG00000243667	G	2.39964e-07	-0.0616701	0.00119982	A	+	2	68423530	WDR92	1
2:68423530:A:G	eQTLcatalogue	Fairfax_2012_B-cell_CD19	ENSG00000221823	G	7.31737e-26	0.1529	3.65869e-22	A	-	2	68423530	PPP3R1	1
2:68430925:C:T	eQTLcatalogue	Fairfax_2012_B-cell_CD19	ENSG00000243667	C	2.39666e-07	-0.0615862	0.00119833	T	+	2	68430925	WDR92	1
2:68430925:C:T	eQTLcatalogue	Fairfax_2012_B-cell_CD19	ENSG00000221823	C	7.54808e-26	0.15265	3.77404e-22	T	-	2	68430925	PPP3R1	1
2:68431259:A:G	eQTLcatalogue	Fairfax_2012_B-cell_CD19	ENSG00000243667	G	2.39373e-07	-0.0615855	0.00119686	A	+	2	68431259	WDR92	1
2:68431259:A:G	eQTLcatalogue	Fairfax_2012_B-cell_CD19	ENSG00000221823	G	7.56757e-26	0.152639	3.78378e-22	A	-	2	68431259	PPP3R1	1
2:68433831:A:G	eQTLcatalogue	Fairfax_2012_B-cell_CD19	ENSG00000243667	G	2.40614e-07	-0.0615328	0.00120307	A	+	2	68433831	WDR92	1
2:68433831:A:G	eQTLcatalogue	Fairfax_2012_B-cell_CD19	ENSG00000221823	G	7.72249e-26	0.152513	3.86124e-22	A	-	2	68433831	PPP3R1	1
2:68435431:C:G	eQTLcatalogue	Fairfax_2012_B-cell_CD19	ENSG00000243667	C	2.40279e-07	-0.0617224	0.0012014	G	+	2	68435431	WDR92	1
2:68435431:C:G	eQTLcatalogue	Fairfax_2012_B-cell_CD19	ENSG00000221823	C	7.54042e-26	0.153003	3.77021e-22	G	-	2	68435431	PPP3R1	1
2:68438614:C:T	eQTLcatalogue	Fairfax_2012_B-cell_CD19	ENSG00000243667	C	2.57004e-07	-0.061873	0.00128502	T	+	2	68438614	WDR92	1
2:68438614:C:T	eQTLcatalogue	Fairfax_2012_B-cell_CD19	ENSG00000221823	C	6.35375e-26	0.153926	3.17688e-22	T	-	2	68438614	PPP3R1	1
2:68439960:C:T	eQTLcatalogue	Fairfax_2012_B-cell_CD19	ENSG00000243667	C	2.42086e-07	-0.062183	0.00121043	T	+	2	68439960	WDR92	1
2:68439960:C:T	eQTLcatalogue	Fairfax_2012_B-cell_CD19	ENSG00000221823	C	6.59339e-26	0.154335	3.29669e-22	T	-	2	68439960	PPP3R1	1
2:68443651:A:G	eQTLcatalogue	Fairfax_2012_B-cell_CD19	ENSG00000243667	A	2.51479e-07	-0.0623727	0.00125739	G	+	2	68443651	WDR92	1
2:68443651:A:G	eQTLcatalogue	Fairfax_2012_B-cell_CD19	ENSG00000221823	A	6.25988e-26	0.155069	3.12994e-22	G	-	2	68443651	PPP3R1	1
2:68443835:A:T	eQTLcatalogue	Fairfax_2012_B-cell_CD19	ENSG00000243667	A	2.52034e-07	-0.0623623	0.00126017	T	+	2	68443835	WDR92	1
2:68443835:A:T	eQTLcatalogue	Fairfax_2012_B-cell_CD19	ENSG00000221823	A	6.24891e-26	0.155057	3.12446e-22	T	-	2	68443835	PPP3R1	1
2:68446936:C:T	eQTLcatalogue	Fairfax_2012_B-cell_CD19	ENSG00000243667	C	3.04132e-07	-0.0620876	0.00152066	T	+	2	68446936	WDR92	1
2:68446936:C:T	eQTLcatalogue	Fairfax_2012_B-cell_CD19	ENSG00000221823	C	6.14333e-26	0.155408	3.07167e-22	T	-	2	68446936	PPP3R1	1
2:68457573:C:T	eQTLcatalogue	Fairfax_2012_B-cell_CD19	ENSG00000243667	C	3.47286e-07	-0.0624127	0.00173643	T	+	2	68457573	WDR92	1
2:68457573:C:T	eQTLcatalogue	Fairfax_2012_B-cell_CD19	ENSG00000221823	C	6.34079e-26	0.156919	3.1704e-22	T	-	2	68457573	PPP3R1	1
2:68457854:A:G	eQTLcatalogue	Fairfax_2012_B-cell_CD19	ENSG00000243667	A	3.66557e-07	-0.0623297	0.00183279	G	+	2	68457854	WDR92	1
2:68457854:A:G	eQTLcatalogue	Fairfax_2012_B-cell_CD19	ENSG00000221823	A	4.52371e-26	0.157396	2.26185e-22	G	-	2	68457854	PPP3R1	1
2:68463612:A:G	eQTLcatalogue	Fairfax_2012_B-cell_CD19	ENSG00000243667	G	4.03287e-07	-0.0623417	0.00201644	A	+	2	68463612	WDR92	1
2:68463612:A:G	eQTLcatalogue	Fairfax_2012_B-cell_CD19	ENSG00000221823	G	8.02377e-26	0.157308	4.01188e-22	A	-	2	68463612	PPP3R1	1
2:68467910:A:C	eQTLcatalogue	Fairfax_2012_B-cell_CD19	ENSG00000243667	A	4.35189e-07	-0.0622468	0.00217595	C	+	2	68467910	WDR92	1
2:68467910:A:C	eQTLcatalogue	Fairfax_2012_B-cell_CD19	ENSG00000221823	A	9.31744e-26	0.157327	4.65872e-22	C	-	2	68467910	PPP3R1	1
2:68475595:A:C	eQTLcatalogue	Fairfax_2012_B-cell_CD19	ENSG00000243667	C	5.28573e-07	-0.0619252	0.00264286	A	+	2	68475595	WDR92	1
2:68475595:A:C	eQTLcatalogue	Fairfax_2012_B-cell_CD19	ENSG00000221823	C	1.49508e-25	0.157075	7.4754e-22	A	-	2	68475595	PPP3R1	1
2:68477248:C:T	eQTLcatalogue	Fairfax_2012_B-cell_CD19	ENSG00000243667	T	4.8333e-07	-0.0624015	0.00241665	C	+	2	68477248	WDR92	1
2:68477248:C:T	eQTLcatalogue	Fairfax_2012_B-cell_CD19	ENSG00000221823	T	2.60344e-25	0.157115	1.30172e-21	C	-	2	68477248	PPP3R1	1
2:68478919:A:G	eQTLcatalogue	Fairfax_2012_B-cell_CD19	ENSG00000243667	A	4.27999e-07	-0.0625528	0.00214	G	+	2	68478919	WDR92	1
2:68478919:A:G	eQTLcatalogue	Fairfax_2012_B-cell_CD19	ENSG00000221823	A	1.18236e-24	0.155002	5.9118e-21	G	-	2	68478919	PPP3R1	1
2:238877170:C:G	eQTLcatalogue	Fairfax_2012_B-cell_CD19	ENSG00000184182	C	6.16821e-12	0.0737106	3.08411e-08	C	+	2	238877170	UBE2F	1
2:238877409:A:C	eQTLcatalogue	Fairfax_2012_B-cell_CD19	ENSG00000184182	A	6.74004e-12	0.0733768	3.37002e-08	A	+	2	238877409	UBE2F	1
2:238893362:C:T	eQTLcatalogue	Fairfax_2012_B-cell_CD19	ENSG00000184182	T	6.61206e-12	0.0740521	3.30603e-08	T	+	2	238893362	UBE2F	1
2:238895507:A:G	eQTLcatalogue	Fairfax_2012_B-cell_CD19	ENSG00000184182	G	6.79146e-12	0.0741511	3.39573e-08	G	+	2	238895507	UBE2F	1
2:238907642:A:C	eQTLcatalogue	Fairfax_2012_B-cell_CD19	ENSG00000184182	A	8.38082e-12	0.074457	4.19041e-08	A	+	2	238907642	UBE2F	1
2:238909269:A:G	eQTLcatalogue	Fairfax_2012_B-cell_CD19	ENSG00000184182	A	8.73947e-12	0.074484	4.36973e-08	A	+	2	238909269	UBE2F	1
2:238910663:C:T	eQTLcatalogue	Fairfax_2012_B-cell_CD19	ENSG00000184182	T	8.90885e-12	0.0745215	4.45442e-08	T	+	2	238910663	UBE2F	1
2:238912120:A:C	eQTLcatalogue	Fairfax_2012_B-cell_CD19	ENSG00000184182	A	9.0831e-12	0.0745383	4.54155e-08	A	+	2	238912120	UBE2F	1
2:238912478:A:G	eQTLcatalogue	Fairfax_2012_B-cell_CD19	ENSG00000184182	G	9.29505e-12	0.074532	4.64752e-08	G	+	2	238912478	UBE2F	1
2:238922585:G:T	eQTLcatalogue	Fairfax_2012_B-cell_CD19	ENSG00000184182	G	1.09262e-11	0.0745648	5.4631e-08	G	+	2	238922585	UBE2F	1
2:238930632:A:G	eQTLcatalogue	Fairfax_2012_B-cell_CD19	ENSG00000184182	A	1.70837e-11	0.0738091	8.54185e-08	A	+	2	238930632	UBE2F	1
2:238932389:A:G	eQTLcatalogue	Fairfax_2012_B-cell_CD19	ENSG00000184182	G	1.29947e-11	0.0745179	6.49735e-08	G	+	2	238932389	UBE2F	1
2:238939370:C:T	eQTLcatalogue	Fairfax_2012_B-cell_CD19	ENSG00000184182	C	1.40996e-12	0.0772287	7.0498e-09	C	+	2	238939370	UBE2F	1
3:153992586:A:G	eQTLcatalogue	Fairfax_2012_B-cell_CD19	ENSG00000174953	A	1.9164e-10	-0.0894069	9.582e-07	G	+	3	153992586	DHX36	1
3:153992586:A:G	eQTLcatalogue	Fairfax_2012_B-cell_CD19	ENSG00000174953	A	8.93409e-14	-0.124337	4.46705e-10	G	+	3	153992586	DHX36	1
3:154004009:C:T	eQTLcatalogue	Fairfax_2012_B-cell_CD19	ENSG00000174953	T	1.61946e-10	-0.0899253	8.0973e-07	C	+	3	154004009	DHX36	1
3:154004009:C:T	eQTLcatalogue	Fairfax_2012_B-cell_CD19	ENSG00000174953	T	5.9927e-14	-0.125381	2.99635e-10	C	+	3	154004009	DHX36	1
3:154009933:C:T	eQTLcatalogue	Fairfax_2012_B-cell_CD19	ENSG00000174953	T	1.96557e-10	-0.0893885	9.82785e-07	C	+	3	154009933	DHX36	1
3:154009933:C:T	eQTLcatalogue	Fairfax_2012_B-cell_CD19	ENSG00000174953	T	8.83189e-14	-0.124405	4.41594e-10	C	+	3	154009933	DHX36	1
3:154036196:A:G	eQTLcatalogue	Fairfax_2012_B-cell_CD19	ENSG00000174953	A	4.02247e-10	-0.0881303	2.01123e-06	G	+	3	154036196	DHX36	1
3:154036196:A:G	eQTLcatalogue	Fairfax_2012_B-cell_CD19	ENSG00000174953	A	8.32751e-14	-0.124793	4.16376e-10	G	+	3	154036196	DHX36	1
3:154036657:C:T	eQTLcatalogue	Fairfax_2012_B-cell_CD19	ENSG00000174953	C	4.06328e-10	-0.0881312	2.03164e-06	T	+	3	154036657	DHX36	1
3:154036657:C:T	eQTLcatalogue	Fairfax_2012_B-cell_CD19	ENSG00000174953	C	8.2942e-14	-0.124832	4.1471e-10	T	+	3	154036657	DHX36	1
3:154040273:A:G	eQTLcatalogue	Fairfax_2012_B-cell_CD19	ENSG00000174953	G	4.60217e-10	-0.0878291	2.30108e-06	A	+	3	154040273	DHX36	1
3:154040273:A:G	eQTLcatalogue	Fairfax_2012_B-cell_CD19	ENSG00000174953	G	8.56781e-14	-0.124701	4.28391e-10	A	+	3	154040273	DHX36	1
10:126679510:A:G	eQTLcatalogue	Fairfax_2012_B-cell_CD19	ENSG00000019995	A	2.7546e-29	0.320993	1.3773e-25	A	+	10	126679510	ZRANB1	1
10:126685539:A:G	eQTLcatalogue	Fairfax_2012_B-cell_CD19	ENSG00000019995	G	2.26216e-23	0.278156	1.13108e-19	G	+	10	126685539	ZRANB1	1
10:126687613:C:T	eQTLcatalogue	Fairfax_2012_B-cell_CD19	ENSG00000019995	T	2.68652e-23	0.277636	1.34326e-19	T	+	10	126687613	ZRANB1	1
10:126711259:A:G	eQTLcatalogue	Fairfax_2012_B-cell_CD19	ENSG00000019995	A	4.16627e-15	0.23136	2.08313e-11	A	+	10	126711259	ZRANB1	1
10:126713026:A:G	eQTLcatalogue	Fairfax_2012_B-cell_CD19	ENSG00000019995	A	1.45768e-14	0.226599	7.2884e-11	A	+	10	126713026	ZRANB1	1
10:126714169:C:T	eQTLcatalogue	Fairfax_2012_B-cell_CD19	ENSG00000019995	C	3.41723e-14	0.22289	1.70862e-10	C	+	10	126714169	ZRANB1	1
10:126718244:C:T	eQTLcatalogue	Fairfax_2012_B-cell_CD19	ENSG00000019995	C	3.52481e-14	0.222521	1.76241e-10	C	+	10	126718244	ZRANB1	1
10:126721819:A:C	eQTLcatalogue	Fairfax_2012_B-cell_CD19	ENSG00000019995	C	3.53607e-14	0.222494	1.76803e-10	C	+	10	126721819	ZRANB1	1
10:126722149:C:G	eQTLcatalogue	Fairfax_2012_B-cell_CD19	ENSG00000019995	C	1.14757e-13	0.217001	5.73785e-10	C	+	10	126722149	ZRANB1	1
10:126722453:C:T	eQTLcatalogue	Fairfax_2012_B-cell_CD19	ENSG00000019995	C	3.53253e-14	0.222486	1.76627e-10	C	+	10	126722453	ZRANB1	1
10:126723939:A:G	eQTLcatalogue	Fairfax_2012_B-cell_CD19	ENSG00000019995	G	3.57435e-14	0.222485	1.78718e-10	G	+	10	126723939	ZRANB1	1
10:126726979:C:T	eQTLcatalogue	Fairfax_2012_B-cell_CD19	ENSG00000019995	C	1.00728e-13	0.217482	5.0364e-10	C	+	10	126726979	ZRANB1	1
10:126727268:A:C	eQTLcatalogue	Fairfax_2012_B-cell_CD19	ENSG00000019995	A	1.08314e-13	0.21707	5.4157e-10	A	+	10	126727268	ZRANB1	1
10:126730827:A:G	eQTLcatalogue	Fairfax_2012_B-cell_CD19	ENSG00000019995	A	1.62867e-13	0.216928	8.14335e-10	A	+	10	126730827	ZRANB1	1
10:126733276:C:T	eQTLcatalogue	Fairfax_2012_B-cell_CD19	ENSG00000019995	C	9.34044e-15	0.230826	4.67022e-11	C	+	10	126733276	ZRANB1	1
10:126737566:C:G	eQTLcatalogue	Fairfax_2012_B-cell_CD19	ENSG00000019995	G	2.09379e-12	0.211832	1.04689e-08	G	+	10	126737566	ZRANB1	1
11:458595:A:G	eQTLcatalogue	Fairfax_2012_B-cell_CD19	ENSG00000185101	G	3.19787e-07	0.107707	0.00159894	G	+	11	458595	ANO9	1
11:458595:A:G	eQTLcatalogue	Fairfax_2012_B-cell_CD19	ENSG00000023191	G	5.75895e-06	-0.0843568	0.0287948	G	-	11	458595	RNH1	1
11:460765:A:G	eQTLcatalogue	Fairfax_2012_B-cell_CD19	ENSG00000185101	A	2.56655e-07	0.10307	0.00128327	A	+	11	460765	ANO9	1
11:460765:A:G	eQTLcatalogue	Fairfax_2012_B-cell_CD19	ENSG00000023191	A	1.73295e-06	-0.0843031	0.00866475	A	-	11	460765	RNH1	1
11:462684:C:T	eQTLcatalogue	Fairfax_2012_B-cell_CD19	ENSG00000185101	C	3.05556e-07	0.107603	0.00152778	C	+	11	462684	ANO9	1
11:462684:C:T	eQTLcatalogue	Fairfax_2012_B-cell_CD19	ENSG00000023191	C	6.80893e-06	-0.0835066	0.0340447	C	-	11	462684	RNH1	1
11:462855:A:G	eQTLcatalogue	Fairfax_2012_B-cell_CD19	ENSG00000185101	G	2.44654e-07	0.103196	0.00122327	G	+	11	462855	ANO9	1
11:462855:A:G	eQTLcatalogue	Fairfax_2012_B-cell_CD19	ENSG00000023191	G	1.86663e-06	-0.084013	0.00933315	G	-	11	462855	RNH1	1
11:467368:A:G	eQTLcatalogue	Fairfax_2012_B-cell_CD19	ENSG00000185101	A	2.17634e-07	0.103394	0.00108817	A	+	11	467368	ANO9	1
11:467368:A:G	eQTLcatalogue	Fairfax_2012_B-cell_CD19	ENSG00000023191	A	2.37475e-06	-0.0830125	0.0118738	A	-	11	467368	RNH1	1
11:473300:G:T	eQTLcatalogue	Fairfax_2012_B-cell_CD19	ENSG00000185101	G	1.93208e-07	0.103489	0.00096604	G	+	11	473300	ANO9	1
11:473300:G:T	eQTLcatalogue	Fairfax_2012_B-cell_CD19	ENSG00000023191	G	3.12292e-06	-0.0818077	0.0156146	G	-	11	473300	RNH1	1
11:477623:C:T	eQTLcatalogue	Fairfax_2012_B-cell_CD19	ENSG00000185101	C	1.81429e-07	0.103544	0.000907145	C	+	11	477623	ANO9	1
11:477623:C:T	eQTLcatalogue	Fairfax_2012_B-cell_CD19	ENSG00000023191	C	3.6137e-06	-0.0811691	0.0180685	C	-	11	477623	RNH1	1
11:484469:C:T	eQTLcatalogue	Fairfax_2012_B-cell_CD19	ENSG00000185101	C	1.69496e-07	0.104104	0.00084748	C	+	11	484469	ANO9	1
11:484469:C:T	eQTLcatalogue	Fairfax_2012_B-cell_CD19	ENSG00000023191	C	3.76028e-06	-0.0812819	0.0188014	C	-	11	484469	RNH1	1
11:486414:A:G	eQTLcatalogue	Fairfax_2012_B-cell_CD19	ENSG00000185101	G	1.60534e-07	0.10443	0.00080267	G	+	11	486414	ANO9	1
11:486414:A:G	eQTLcatalogue	Fairfax_2012_B-cell_CD19	ENSG00000023191	G	3.79695e-06	-0.0813539	0.0189848	G	-	11	486414	RNH1	1
11:487101:C:T	eQTLcatalogue	Fairfax_2012_B-cell_CD19	ENSG00000185101	C	1.66788e-07	0.104278	0.00083394	C	+	11	487101	ANO9	1
11:487101:C:T	eQTLcatalogue	Fairfax_2012_B-cell_CD19	ENSG00000023191	C	3.95893e-06	-0.0811926	0.0197947	C	-	11	487101	RNH1	1
11:487136:A:G	eQTLcatalogue	Fairfax_2012_B-cell_CD19	ENSG00000185101	G	2.20926e-07	0.108093	0.00110463	G	+	11	487136	ANO9	1
11:487201:C:T	eQTLcatalogue	Fairfax_2012_B-cell_CD19	ENSG00000185101	T	1.66818e-07	0.104287	0.00083409	T	+	11	487201	ANO9	1
11:487201:C:T	eQTLcatalogue	Fairfax_2012_B-cell_CD19	ENSG00000023191	T	3.96352e-06	-0.0811959	0.0198176	T	-	11	487201	RNH1	1
11:490035:C:T	eQTLcatalogue	Fairfax_2012_B-cell_CD19	ENSG00000185101	C	9.7494e-06	0.106911	0.048747	C	+	11	490035	ANO9	1
11:490035:C:T	eQTLcatalogue	Fairfax_2012_B-cell_CD19	ENSG00000185101	C	1.49785e-06	0.106875	0.00748925	C	+	11	490035	ANO9	1
11:491334:A:C	eQTLcatalogue	Fairfax_2012_B-cell_CD19	ENSG00000185101	A	7.19448e-08	0.10682	0.000359724	A	+	11	491334	ANO9	1
11:491334:A:C	eQTLcatalogue	Fairfax_2012_B-cell_CD19	ENSG00000023191	A	8.51286e-06	-0.0781871	0.0425643	A	-	11	491334	RNH1	1
11:494662:A:G	eQTLcatalogue	Fairfax_2012_B-cell_CD19	ENSG00000185101	G	7.39269e-08	0.106635	0.000369634	G	+	11	494662	ANO9	1
11:494662:A:G	eQTLcatalogue	Fairfax_2012_B-cell_CD19	ENSG00000023191	G	9.05441e-06	-0.0778939	0.0452721	G	-	11	494662	RNH1	1
11:495699:A:C	eQTLcatalogue	Fairfax_2012_B-cell_CD19	ENSG00000185101	A	7.38905e-08	0.10664	0.000369452	A	+	11	495699	ANO9	1
11:495699:A:C	eQTLcatalogue	Fairfax_2012_B-cell_CD19	ENSG00000023191	A	9.04853e-06	-0.0778986	0.0452427	A	-	11	495699	RNH1	1
11:495892:C:G	eQTLcatalogue	Fairfax_2012_B-cell_CD19	ENSG00000185101	C	7.38905e-08	0.10664	0.000369452	C	+	11	495892	ANO9	1
11:495892:C:G	eQTLcatalogue	Fairfax_2012_B-cell_CD19	ENSG00000023191	C	9.04853e-06	-0.0778986	0.0452427	C	-	11	495892	RNH1	1
11:496193:G:T	eQTLcatalogue	Fairfax_2012_B-cell_CD19	ENSG00000185101	T	8.97016e-08	0.106129	0.000448508	T	+	11	496193	ANO9	1
11:496193:G:T	eQTLcatalogue	Fairfax_2012_B-cell_CD19	ENSG00000023191	T	9.64585e-06	-0.0777738	0.0482293	T	-	11	496193	RNH1	1
11:501468:A:G	eQTLcatalogue	Fairfax_2012_B-cell_CD19	ENSG00000185101	G	7.35648e-08	0.106667	0.000367824	G	+	11	501468	ANO9	1
11:501468:A:G	eQTLcatalogue	Fairfax_2012_B-cell_CD19	ENSG00000023191	G	9.06988e-06	-0.0778993	0.0453494	G	-	11	501468	RNH1	1
11:502371:A:G	eQTLcatalogue	Fairfax_2012_B-cell_CD19	ENSG00000185101	G	7.35226e-08	0.106675	0.000367613	G	+	11	502371	ANO9	1
11:502371:A:G	eQTLcatalogue	Fairfax_2012_B-cell_CD19	ENSG00000023191	G	9.10283e-06	-0.0778906	0.0455142	G	-	11	502371	RNH1	1
11:503385:C:G	eQTLcatalogue	Fairfax_2012_B-cell_CD19	ENSG00000185101	C	7.37352e-08	0.106718	0.000368676	C	+	11	503385	ANO9	1
11:503385:C:G	eQTLcatalogue	Fairfax_2012_B-cell_CD19	ENSG00000023191	C	9.19167e-06	-0.0778934	0.0459583	C	-	11	503385	RNH1	1
11:503710:C:T	eQTLcatalogue	Fairfax_2012_B-cell_CD19	ENSG00000185101	C	7.36738e-08	0.10673	0.000368369	C	+	11	503710	ANO9	1
11:503710:C:T	eQTLcatalogue	Fairfax_2012_B-cell_CD19	ENSG00000023191	C	9.22347e-06	-0.0778875	0.0461174	C	-	11	503710	RNH1	1
11:504411:C:G	eQTLcatalogue	Fairfax_2012_B-cell_CD19	ENSG00000185101	C	7.41614e-08	0.106753	0.000370807	C	+	11	504411	ANO9	1
11:504411:C:G	eQTLcatalogue	Fairfax_2012_B-cell_CD19	ENSG00000023191	C	9.27446e-06	-0.0779008	0.0463723	C	-	11	504411	RNH1	1
11:506229:C:T	eQTLcatalogue	Fairfax_2012_B-cell_CD19	ENSG00000185101	C	7.42771e-08	0.106828	0.000371386	C	+	11	506229	ANO9	1
11:506229:C:T	eQTLcatalogue	Fairfax_2012_B-cell_CD19	ENSG00000023191	C	9.44291e-06	-0.077893	0.0472146	C	-	11	506229	RNH1	1
11:506442:G:T	eQTLcatalogue	Fairfax_2012_B-cell_CD19	ENSG00000185101	G	7.42861e-08	0.106848	0.000371431	G	+	11	506442	ANO9	1
11:506442:G:T	eQTLcatalogue	Fairfax_2012_B-cell_CD19	ENSG00000023191	G	9.49294e-06	-0.0778888	0.0474647	G	-	11	506442	RNH1	1
11:506596:C:T	eQTLcatalogue	Fairfax_2012_B-cell_CD19	ENSG00000185101	C	7.42502e-08	0.106855	0.000371251	C	+	11	506596	ANO9	1
11:506596:C:T	eQTLcatalogue	Fairfax_2012_B-cell_CD19	ENSG00000023191	C	9.48303e-06	-0.0778961	0.0474151	C	-	11	506596	RNH1	1
12:104331157:C:T	eQTLcatalogue	Fairfax_2012_B-cell_CD19	ENSG00000139372	C	1.24423e-06	0.0869484	0.00622115	C	+	12	104331157	TDG	1
12:104333828:C:T	eQTLcatalogue	Fairfax_2012_B-cell_CD19	ENSG00000139372	C	1.23006e-06	0.0869099	0.0061503	C	+	12	104333828	TDG	1
12:104334303:C:T	eQTLcatalogue	Fairfax_2012_B-cell_CD19	ENSG00000139372	T	1.22229e-06	0.086935	0.00611145	T	+	12	104334303	TDG	1
12:104337667:A:G	eQTLcatalogue	Fairfax_2012_B-cell_CD19	ENSG00000139372	G	1.21868e-06	0.0869493	0.0060934	G	+	12	104337667	TDG	1
14:74480794:C:G	eQTLcatalogue	Fairfax_2012_B-cell_CD19	ENSG00000119723	G	1.6306e-07	-0.087842	0.0008153	C	+	14	74480794	COQ6	1
14:74485133:C:T	eQTLcatalogue	Fairfax_2012_B-cell_CD19	ENSG00000119723	C	1.53619e-07	-0.0878123	0.000768095	T	+	14	74485133	COQ6	1
2:68385097:A:G	eQTLcatalogue	Fairfax_2014_IFN24	ENSG00000243667	A	4.4721e-07	-0.0657429	0.00223605	G	+	2	68385097	WDR92	1
2:68385097:A:G	eQTLcatalogue	Fairfax_2014_IFN24	ENSG00000115946	A	1.73545e-11	-0.0808512	8.67725e-08	G	+	2	68385097	PNO1	1
2:68385097:A:G	eQTLcatalogue	Fairfax_2014_IFN24	ENSG00000221823	A	9.60319e-23	0.156591	4.80159e-19	G	-	2	68385097	PPP3R1	1
2:68393144:A:T	eQTLcatalogue	Fairfax_2014_IFN24	ENSG00000243667	T	6.22123e-06	-0.0595499	0.0311062	A	+	2	68393144	WDR92	1
2:68393144:A:T	eQTLcatalogue	Fairfax_2014_IFN24	ENSG00000115946	T	3.14272e-11	-0.0805375	1.57136e-07	A	+	2	68393144	PNO1	1
2:68393144:A:T	eQTLcatalogue	Fairfax_2014_IFN24	ENSG00000221823	T	2.93061e-25	0.165802	1.46531e-21	A	-	2	68393144	PPP3R1	1
2:68394184:C:T	eQTLcatalogue	Fairfax_2014_IFN24	ENSG00000243667	C	6.43714e-06	-0.0594242	0.0321857	T	+	2	68394184	WDR92	1
2:68394184:C:T	eQTLcatalogue	Fairfax_2014_IFN24	ENSG00000115946	C	3.22726e-11	-0.0804481	1.61363e-07	T	+	2	68394184	PNO1	1
2:68394184:C:T	eQTLcatalogue	Fairfax_2014_IFN24	ENSG00000221823	C	2.59694e-25	0.165869	1.29847e-21	T	-	2	68394184	PPP3R1	1
2:68395631:A:G	eQTLcatalogue	Fairfax_2014_IFN24	ENSG00000243667	G	6.62641e-06	-0.059295	0.0331321	A	+	2	68395631	WDR92	1
2:68395631:A:G	eQTLcatalogue	Fairfax_2014_IFN24	ENSG00000115946	G	3.36825e-11	-0.0803078	1.68413e-07	A	+	2	68395631	PNO1	1
2:68395631:A:G	eQTLcatalogue	Fairfax_2014_IFN24	ENSG00000221823	G	2.27313e-25	0.165902	1.13656e-21	A	-	2	68395631	PPP3R1	1
2:68398919:C:G	eQTLcatalogue	Fairfax_2014_IFN24	ENSG00000243667	G	6.9233e-06	-0.0591795	0.0346165	C	+	2	68398919	WDR92	1
2:68398919:C:G	eQTLcatalogue	Fairfax_2014_IFN24	ENSG00000115946	G	4.04971e-11	-0.080002	2.02486e-07	C	+	2	68398919	PNO1	1
2:68398919:C:G	eQTLcatalogue	Fairfax_2014_IFN24	ENSG00000221823	G	1.83228e-25	0.166193	9.1614e-22	C	-	2	68398919	PPP3R1	1
2:68399190:C:T	eQTLcatalogue	Fairfax_2014_IFN24	ENSG00000243667	C	7.18195e-06	-0.0589369	0.0359098	T	+	2	68399190	WDR92	1
2:68399190:C:T	eQTLcatalogue	Fairfax_2014_IFN24	ENSG00000115946	C	3.75214e-11	-0.0799375	1.87607e-07	T	+	2	68399190	PNO1	1
2:68399190:C:T	eQTLcatalogue	Fairfax_2014_IFN24	ENSG00000221823	C	1.68902e-25	0.165897	8.4451e-22	T	-	2	68399190	PPP3R1	1
2:68402012:G:T	eQTLcatalogue	Fairfax_2014_IFN24	ENSG00000243667	G	7.82537e-06	-0.0585689	0.0391268	T	+	2	68402012	WDR92	1
2:68402012:G:T	eQTLcatalogue	Fairfax_2014_IFN24	ENSG00000115946	G	4.18707e-11	-0.0795705	2.09353e-07	T	+	2	68402012	PNO1	1
2:68402012:G:T	eQTLcatalogue	Fairfax_2014_IFN24	ENSG00000221823	G	1.35114e-25	0.165807	6.7557e-22	T	-	2	68402012	PPP3R1	1
2:68402830:C:G	eQTLcatalogue	Fairfax_2014_IFN24	ENSG00000243667	G	7.82513e-06	-0.0585703	0.0391257	C	+	2	68402830	WDR92	1
2:68402830:C:G	eQTLcatalogue	Fairfax_2014_IFN24	ENSG00000115946	G	4.18428e-11	-0.0795735	2.09214e-07	C	+	2	68402830	PNO1	1
2:68402830:C:G	eQTLcatalogue	Fairfax_2014_IFN24	ENSG00000221823	G	1.35253e-25	0.16581	6.76265e-22	C	-	2	68402830	PPP3R1	1
2:68410372:A:C	eQTLcatalogue	Fairfax_2014_IFN24	ENSG00000243667	C	7.89932e-06	-0.0586281	0.0394966	A	+	2	68410372	WDR92	1
2:68410372:A:C	eQTLcatalogue	Fairfax_2014_IFN24	ENSG00000115946	C	3.93903e-11	-0.0797889	1.96951e-07	A	+	2	68410372	PNO1	1
2:68410372:A:C	eQTLcatalogue	Fairfax_2014_IFN24	ENSG00000221823	C	1.28273e-25	0.166115	6.41365e-22	A	-	2	68410372	PPP3R1	1
2:68410660:G:T	eQTLcatalogue	Fairfax_2014_IFN24	ENSG00000243667	T	7.89682e-06	-0.0586303	0.0394841	G	+	2	68410660	WDR92	1
2:68410660:G:T	eQTLcatalogue	Fairfax_2014_IFN24	ENSG00000115946	T	3.93225e-11	-0.0797936	1.96613e-07	G	+	2	68410660	PNO1	1
2:68410660:G:T	eQTLcatalogue	Fairfax_2014_IFN24	ENSG00000221823	T	1.28167e-25	0.16612	6.40835e-22	G	-	2	68410660	PPP3R1	1
2:68411414:A:G	eQTLcatalogue	Fairfax_2014_IFN24	ENSG00000243667	G	7.90252e-06	-0.0586304	0.0395126	A	+	2	68411414	WDR92	1
2:68411414:A:G	eQTLcatalogue	Fairfax_2014_IFN24	ENSG00000115946	G	3.91591e-11	-0.0798034	1.95796e-07	A	+	2	68411414	PNO1	1
2:68411414:A:G	eQTLcatalogue	Fairfax_2014_IFN24	ENSG00000221823	G	1.28503e-25	0.166122	6.42515e-22	A	-	2	68411414	PPP3R1	1
2:68418868:A:T	eQTLcatalogue	Fairfax_2014_IFN24	ENSG00000243667	A	7.88674e-06	-0.0586738	0.0394337	T	+	2	68418868	WDR92	1
2:68418868:A:T	eQTLcatalogue	Fairfax_2014_IFN24	ENSG00000115946	A	3.93221e-11	-0.0798481	1.9661e-07	T	+	2	68418868	PNO1	1
2:68418868:A:T	eQTLcatalogue	Fairfax_2014_IFN24	ENSG00000221823	A	1.29219e-25	0.166222	6.46095e-22	T	-	2	68418868	PPP3R1	1
2:68419487:A:G	eQTLcatalogue	Fairfax_2014_IFN24	ENSG00000243667	G	7.87773e-06	-0.0586783	0.0393886	A	+	2	68419487	WDR92	1
2:68419487:A:G	eQTLcatalogue	Fairfax_2014_IFN24	ENSG00000115946	G	3.92879e-11	-0.0798514	1.96439e-07	A	+	2	68419487	PNO1	1
2:68419487:A:G	eQTLcatalogue	Fairfax_2014_IFN24	ENSG00000221823	G	1.2927e-25	0.166226	6.4635e-22	A	-	2	68419487	PPP3R1	1
2:68420070:G:T	eQTLcatalogue	Fairfax_2014_IFN24	ENSG00000243667	G	7.87891e-06	-0.0586784	0.0393946	T	+	2	68420070	WDR92	1
2:68420070:G:T	eQTLcatalogue	Fairfax_2014_IFN24	ENSG00000115946	G	3.93753e-11	-0.0798484	1.96876e-07	T	+	2	68420070	PNO1	1
2:68420070:G:T	eQTLcatalogue	Fairfax_2014_IFN24	ENSG00000221823	G	1.29284e-25	0.166227	6.4642e-22	T	-	2	68420070	PPP3R1	1
2:68421049:A:G	eQTLcatalogue	Fairfax_2014_IFN24	ENSG00000243667	G	7.88172e-06	-0.0586774	0.0394086	A	+	2	68421049	WDR92	1
2:68421049:A:G	eQTLcatalogue	Fairfax_2014_IFN24	ENSG00000115946	G	3.94283e-11	-0.079846	1.97141e-07	A	+	2	68421049	PNO1	1
2:68421049:A:G	eQTLcatalogue	Fairfax_2014_IFN24	ENSG00000221823	G	1.29619e-25	0.166224	6.48095e-22	A	-	2	68421049	PPP3R1	1
2:68422771:A:G	eQTLcatalogue	Fairfax_2014_IFN24	ENSG00000243667	G	7.87179e-06	-0.058679	0.0393589	A	+	2	68422771	WDR92	1
2:68422771:A:G	eQTLcatalogue	Fairfax_2014_IFN24	ENSG00000115946	G	3.95263e-11	-0.0798393	1.97632e-07	A	+	2	68422771	PNO1	1
2:68422771:A:G	eQTLcatalogue	Fairfax_2014_IFN24	ENSG00000221823	G	1.29497e-25	0.16622	6.47485e-22	A	-	2	68422771	PPP3R1	1
2:68423530:A:G	eQTLcatalogue	Fairfax_2014_IFN24	ENSG00000243667	G	7.88287e-06	-0.0586722	0.0394144	A	+	2	68423530	WDR92	1
2:68423530:A:G	eQTLcatalogue	Fairfax_2014_IFN24	ENSG00000115946	G	3.96726e-11	-0.0798291	1.98363e-07	A	+	2	68423530	PNO1	1
2:68423530:A:G	eQTLcatalogue	Fairfax_2014_IFN24	ENSG00000221823	G	1.2931e-25	0.166213	6.4655e-22	A	-	2	68423530	PPP3R1	1
2:68430925:C:T	eQTLcatalogue	Fairfax_2014_IFN24	ENSG00000243667	C	7.81866e-06	-0.0586161	0.0390933	T	+	2	68430925	WDR92	1
2:68430925:C:T	eQTLcatalogue	Fairfax_2014_IFN24	ENSG00000115946	C	4.15504e-11	-0.0796444	2.07752e-07	T	+	2	68430925	PNO1	1
2:68430925:C:T	eQTLcatalogue	Fairfax_2014_IFN24	ENSG00000221823	C	1.36606e-25	0.16592	6.8303e-22	T	-	2	68430925	PPP3R1	1
2:68431259:A:G	eQTLcatalogue	Fairfax_2014_IFN24	ENSG00000243667	G	7.82241e-06	-0.05861	0.0391121	A	+	2	68431259	WDR92	1
2:68431259:A:G	eQTLcatalogue	Fairfax_2014_IFN24	ENSG00000115946	G	4.15524e-11	-0.0796379	2.07762e-07	A	+	2	68431259	PNO1	1
2:68431259:A:G	eQTLcatalogue	Fairfax_2014_IFN24	ENSG00000221823	G	1.35994e-25	0.165912	6.7997e-22	A	-	2	68431259	PPP3R1	1
2:68433831:A:G	eQTLcatalogue	Fairfax_2014_IFN24	ENSG00000243667	G	7.82835e-06	-0.0585669	0.0391418	A	+	2	68433831	WDR92	1
2:68433831:A:G	eQTLcatalogue	Fairfax_2014_IFN24	ENSG00000115946	G	4.18852e-11	-0.0795687	2.09426e-07	A	+	2	68433831	PNO1	1
2:68433831:A:G	eQTLcatalogue	Fairfax_2014_IFN24	ENSG00000221823	G	1.3489e-25	0.165807	6.7445e-22	A	-	2	68433831	PPP3R1	1
2:68435431:C:G	eQTLcatalogue	Fairfax_2014_IFN24	ENSG00000243667	C	7.47555e-06	-0.0588655	0.0373777	G	+	2	68435431	WDR92	1
2:68435431:C:G	eQTLcatalogue	Fairfax_2014_IFN24	ENSG00000115946	C	4.39404e-11	-0.0797222	2.19702e-07	G	+	2	68435431	PNO1	1
2:68435431:C:G	eQTLcatalogue	Fairfax_2014_IFN24	ENSG00000221823	C	1.4789e-25	0.166176	7.3945e-22	G	-	2	68435431	PPP3R1	1
2:68438614:C:T	eQTLcatalogue	Fairfax_2014_IFN24	ENSG00000243667	C	6.61875e-06	-0.0594628	0.0330937	T	+	2	68438614	WDR92	1
2:68438614:C:T	eQTLcatalogue	Fairfax_2014_IFN24	ENSG00000115946	C	4.89711e-11	-0.079896	2.44856e-07	T	+	2	68438614	PNO1	1
2:68438614:C:T	eQTLcatalogue	Fairfax_2014_IFN24	ENSG00000221823	C	2.09077e-25	0.166472	1.04538e-21	T	-	2	68438614	PPP3R1	1
2:68439960:C:T	eQTLcatalogue	Fairfax_2014_IFN24	ENSG00000243667	C	6.39301e-06	-0.0597269	0.031965	T	+	2	68439960	WDR92	1
2:68439960:C:T	eQTLcatalogue	Fairfax_2014_IFN24	ENSG00000115946	C	4.3841e-11	-0.0803124	2.19205e-07	T	+	2	68439960	PNO1	1
2:68439960:C:T	eQTLcatalogue	Fairfax_2014_IFN24	ENSG00000221823	C	2.1445e-25	0.166912	1.07225e-21	T	-	2	68439960	PPP3R1	1
2:68443651:A:G	eQTLcatalogue	Fairfax_2014_IFN24	ENSG00000243667	A	5.18453e-06	-0.0606615	0.0259226	G	+	2	68443651	WDR92	1
2:68443651:A:G	eQTLcatalogue	Fairfax_2014_IFN24	ENSG00000115946	A	5.67544e-11	-0.0803553	2.83772e-07	G	+	2	68443651	PNO1	1
2:68443651:A:G	eQTLcatalogue	Fairfax_2014_IFN24	ENSG00000221823	A	4.00495e-25	0.167097	2.00248e-21	G	-	2	68443651	PPP3R1	1
2:68443835:A:T	eQTLcatalogue	Fairfax_2014_IFN24	ENSG00000243667	A	5.76733e-06	-0.0602521	0.0288367	T	+	2	68443835	WDR92	1
2:68443835:A:T	eQTLcatalogue	Fairfax_2014_IFN24	ENSG00000115946	A	4.96165e-11	-0.080428	2.48082e-07	T	+	2	68443835	PNO1	1
2:68443835:A:T	eQTLcatalogue	Fairfax_2014_IFN24	ENSG00000221823	A	2.93131e-25	0.167181	1.46565e-21	T	-	2	68443835	PPP3R1	1
2:68446936:C:T	eQTLcatalogue	Fairfax_2014_IFN24	ENSG00000243667	C	5.49313e-06	-0.0604904	0.0274656	T	+	2	68446936	WDR92	1
2:68446936:C:T	eQTLcatalogue	Fairfax_2014_IFN24	ENSG00000115946	C	6.2767e-11	-0.0801632	3.13835e-07	T	+	2	68446936	PNO1	1
2:68446936:C:T	eQTLcatalogue	Fairfax_2014_IFN24	ENSG00000221823	C	4.62033e-25	0.166869	2.31016e-21	T	-	2	68446936	PPP3R1	1
2:68457573:C:T	eQTLcatalogue	Fairfax_2014_IFN24	ENSG00000243667	C	3.84684e-06	-0.0620738	0.0192342	T	+	2	68457573	WDR92	1
2:68457573:C:T	eQTLcatalogue	Fairfax_2014_IFN24	ENSG00000115946	C	1.09932e-10	-0.0799859	5.4966e-07	T	+	2	68457573	PNO1	1
2:68457573:C:T	eQTLcatalogue	Fairfax_2014_IFN24	ENSG00000221823	C	1.40158e-24	0.16705	7.0079e-21	T	-	2	68457573	PPP3R1	1
2:68457854:A:G	eQTLcatalogue	Fairfax_2014_IFN24	ENSG00000243667	A	4.30169e-06	-0.0618685	0.0215084	G	+	2	68457854	WDR92	1
2:68457854:A:G	eQTLcatalogue	Fairfax_2014_IFN24	ENSG00000115946	A	1.23432e-10	-0.0799069	6.1716e-07	G	+	2	68457854	PNO1	1
2:68457854:A:G	eQTLcatalogue	Fairfax_2014_IFN24	ENSG00000221823	A	2.52155e-24	0.166508	1.26078e-20	G	-	2	68457854	PPP3R1	1
2:68463612:A:G	eQTLcatalogue	Fairfax_2014_IFN24	ENSG00000243667	G	3.21908e-06	-0.0628245	0.0160954	A	+	2	68463612	WDR92	1
2:68463612:A:G	eQTLcatalogue	Fairfax_2014_IFN24	ENSG00000115946	G	1.58061e-10	-0.0796814	7.90305e-07	A	+	2	68463612	PNO1	1
2:68463612:A:G	eQTLcatalogue	Fairfax_2014_IFN24	ENSG00000221823	G	3.09879e-24	0.166677	1.5494e-20	A	-	2	68463612	PPP3R1	1
2:68467910:A:C	eQTLcatalogue	Fairfax_2014_IFN24	ENSG00000243667	A	2.99644e-06	-0.0630973	0.0149822	C	+	2	68467910	WDR92	1
2:68467910:A:C	eQTLcatalogue	Fairfax_2014_IFN24	ENSG00000115946	A	1.90135e-10	-0.0794488	9.50675e-07	C	+	2	68467910	PNO1	1
2:68467910:A:C	eQTLcatalogue	Fairfax_2014_IFN24	ENSG00000221823	A	4.5665e-24	0.166348	2.28325e-20	C	-	2	68467910	PPP3R1	1
2:68475595:A:C	eQTLcatalogue	Fairfax_2014_IFN24	ENSG00000243667	C	2.5045e-06	-0.0637199	0.0125225	A	+	2	68475595	WDR92	1
2:68475595:A:C	eQTLcatalogue	Fairfax_2014_IFN24	ENSG00000115946	C	3.13565e-10	-0.078712	1.56783e-06	A	+	2	68475595	PNO1	1
2:68475595:A:C	eQTLcatalogue	Fairfax_2014_IFN24	ENSG00000221823	C	1.28165e-23	0.165265	6.40825e-20	A	-	2	68475595	PPP3R1	1
2:68477248:C:T	eQTLcatalogue	Fairfax_2014_IFN24	ENSG00000243667	T	2.30983e-06	-0.06428	0.0115491	C	+	2	68477248	WDR92	1
2:68477248:C:T	eQTLcatalogue	Fairfax_2014_IFN24	ENSG00000115946	T	2.71438e-10	-0.0794015	1.35719e-06	C	+	2	68477248	PNO1	1
2:68477248:C:T	eQTLcatalogue	Fairfax_2014_IFN24	ENSG00000221823	T	1.62341e-23	0.165816	8.11705e-20	C	-	2	68477248	PPP3R1	1
2:68478919:A:G	eQTLcatalogue	Fairfax_2014_IFN24	ENSG00000243667	A	2.56263e-06	-0.0643249	0.0128131	G	+	2	68478919	WDR92	1
2:68478919:A:G	eQTLcatalogue	Fairfax_2014_IFN24	ENSG00000115946	A	3.30792e-10	-0.0794367	1.65396e-06	G	+	2	68478919	PNO1	1
2:68478919:A:G	eQTLcatalogue	Fairfax_2014_IFN24	ENSG00000221823	A	3.43839e-23	0.165571	1.71919e-19	G	-	2	68478919	PPP3R1	1
2:173297783:A:G	eQTLcatalogue	Fairfax_2014_IFN24	ENSG00000091409	G	2.45294e-07	0.271483	0.00122647	G	+	2	173297783	ITGA6	1
2:173300939:A:G	eQTLcatalogue	Fairfax_2014_IFN24	ENSG00000091409	G	1.39122e-07	0.251188	0.00069561	G	+	2	173300939	ITGA6	1
2:173302006:A:G	eQTLcatalogue	Fairfax_2014_IFN24	ENSG00000091409	A	1.50813e-07	0.25	0.000754065	A	+	2	173302006	ITGA6	1
2:173311553:A:G	eQTLcatalogue	Fairfax_2014_IFN24	ENSG00000091409	A	2.10455e-07	0.245306	0.00105228	A	+	2	173311553	ITGA6	1
2:173313453:C:T	eQTLcatalogue	Fairfax_2014_IFN24	ENSG00000091409	C	2.11377e-07	0.245271	0.00105689	C	+	2	173313453	ITGA6	1
2:173314713:A:T	eQTLcatalogue	Fairfax_2014_IFN24	ENSG00000091409	A	2.10842e-07	0.245292	0.00105421	A	+	2	173314713	ITGA6	1
2:173319112:A:T	eQTLcatalogue	Fairfax_2014_IFN24	ENSG00000091409	A	2.0959e-07	0.245337	0.00104795	A	+	2	173319112	ITGA6	1
2:173319930:C:T	eQTLcatalogue	Fairfax_2014_IFN24	ENSG00000091409	C	2.10019e-07	0.245314	0.0010501	C	+	2	173319930	ITGA6	1
2:173321413:A:T	eQTLcatalogue	Fairfax_2014_IFN24	ENSG00000091409	A	2.09989e-07	0.245316	0.00104995	A	+	2	173321413	ITGA6	1
2:173327823:C:T	eQTLcatalogue	Fairfax_2014_IFN24	ENSG00000091409	C	3.32206e-07	0.24405	0.00166103	C	+	2	173327823	ITGA6	1
2:173342416:C:T	eQTLcatalogue	Fairfax_2014_IFN24	ENSG00000091409	C	3.89932e-08	0.286094	0.000194966	C	+	2	173342416	ITGA6	1
2:173344128:A:G	eQTLcatalogue	Fairfax_2014_IFN24	ENSG00000091409	G	3.9195e-08	0.285982	0.000195975	G	+	2	173344128	ITGA6	1
2:173352157:A:T	eQTLcatalogue	Fairfax_2014_IFN24	ENSG00000091409	A	3.9102e-08	0.285986	0.00019551	A	+	2	173352157	ITGA6	1
2:173363917:A:G	eQTLcatalogue	Fairfax_2014_IFN24	ENSG00000091409	A	3.93334e-08	0.286001	0.000196667	A	+	2	173363917	ITGA6	1
2:173368358:G:T	eQTLcatalogue	Fairfax_2014_IFN24	ENSG00000091409	T	3.94206e-08	0.285984	0.000197103	T	+	2	173368358	ITGA6	1
2:238877170:C:G	eQTLcatalogue	Fairfax_2014_IFN24	ENSG00000184182	C	1.37783e-20	-0.122236	6.88915e-17	C	-	2	238877170	UBE2F	1
2:238877409:A:C	eQTLcatalogue	Fairfax_2014_IFN24	ENSG00000184182	A	6.25771e-21	-0.12294	3.12886e-17	A	-	2	238877409	UBE2F	1
2:238893362:C:T	eQTLcatalogue	Fairfax_2014_IFN24	ENSG00000184182	T	1.3735e-20	-0.123205	6.8675e-17	T	-	2	238893362	UBE2F	1
2:238895507:A:G	eQTLcatalogue	Fairfax_2014_IFN24	ENSG00000184182	G	1.41916e-20	-0.123447	7.0958e-17	G	-	2	238895507	UBE2F	1
2:238907642:A:C	eQTLcatalogue	Fairfax_2014_IFN24	ENSG00000184182	A	1.95515e-20	-0.124306	9.77575e-17	A	-	2	238907642	UBE2F	1
2:238909269:A:G	eQTLcatalogue	Fairfax_2014_IFN24	ENSG00000184182	A	2.06305e-20	-0.12442	1.03152e-16	A	-	2	238909269	UBE2F	1
2:238910663:C:T	eQTLcatalogue	Fairfax_2014_IFN24	ENSG00000184182	T	2.13609e-20	-0.124514	1.06805e-16	T	-	2	238910663	UBE2F	1
2:238912120:A:C	eQTLcatalogue	Fairfax_2014_IFN24	ENSG00000184182	A	2.21164e-20	-0.124564	1.10582e-16	A	-	2	238912120	UBE2F	1
2:238912478:A:G	eQTLcatalogue	Fairfax_2014_IFN24	ENSG00000184182	G	2.27746e-20	-0.124584	1.13873e-16	G	-	2	238912478	UBE2F	1
2:238922585:G:T	eQTLcatalogue	Fairfax_2014_IFN24	ENSG00000184182	G	2.99794e-20	-0.124828	1.49897e-16	G	-	2	238922585	UBE2F	1
2:238930632:A:G	eQTLcatalogue	Fairfax_2014_IFN24	ENSG00000184182	A	5.823e-20	-0.124091	2.9115e-16	A	-	2	238930632	UBE2F	1
2:238932389:A:G	eQTLcatalogue	Fairfax_2014_IFN24	ENSG00000184182	G	4.24268e-20	-0.124869	2.12134e-16	G	-	2	238932389	UBE2F	1
2:238939370:C:T	eQTLcatalogue	Fairfax_2014_IFN24	ENSG00000184182	C	1.2606e-18	-0.119944	6.303e-15	C	-	2	238939370	UBE2F	1
3:153992586:A:G	eQTLcatalogue	Fairfax_2014_IFN24	ENSG00000174953	A	8.20281e-08	-0.0854869	0.000410141	G	+	3	153992586	DHX36	1
3:153992586:A:G	eQTLcatalogue	Fairfax_2014_IFN24	ENSG00000174953	A	6.36343e-10	-0.08095	3.18172e-06	G	+	3	153992586	DHX36	1
3:154004009:C:T	eQTLcatalogue	Fairfax_2014_IFN24	ENSG00000174953	T	4.74639e-08	-0.0871692	0.00023732	C	+	3	154004009	DHX36	1
3:154004009:C:T	eQTLcatalogue	Fairfax_2014_IFN24	ENSG00000174953	T	4.10109e-10	-0.0819784	2.05055e-06	C	+	3	154004009	DHX36	1
3:154009933:C:T	eQTLcatalogue	Fairfax_2014_IFN24	ENSG00000174953	T	8.13115e-08	-0.0855376	0.000406557	C	+	3	154009933	DHX36	1
3:154009933:C:T	eQTLcatalogue	Fairfax_2014_IFN24	ENSG00000174953	T	6.25094e-10	-0.08101	3.12547e-06	C	+	3	154009933	DHX36	1
3:154036196:A:G	eQTLcatalogue	Fairfax_2014_IFN24	ENSG00000174953	A	7.1061e-08	-0.0860714	0.000355305	G	+	3	154036196	DHX36	1
3:154036196:A:G	eQTLcatalogue	Fairfax_2014_IFN24	ENSG00000174953	A	4.52844e-10	-0.0817931	2.26422e-06	G	+	3	154036196	DHX36	1
3:154036657:C:T	eQTLcatalogue	Fairfax_2014_IFN24	ENSG00000174953	C	7.1437e-08	-0.0860764	0.000357185	T	+	3	154036657	DHX36	1
3:154036657:C:T	eQTLcatalogue	Fairfax_2014_IFN24	ENSG00000174953	C	4.49433e-10	-0.0818264	2.24717e-06	T	+	3	154036657	DHX36	1
3:154040273:A:G	eQTLcatalogue	Fairfax_2014_IFN24	ENSG00000174953	G	7.05594e-08	-0.0860718	0.000352797	A	+	3	154040273	DHX36	1
3:154040273:A:G	eQTLcatalogue	Fairfax_2014_IFN24	ENSG00000174953	G	4.36968e-10	-0.0818443	2.18484e-06	A	+	3	154040273	DHX36	1
5:405576:A:G	eQTLcatalogue	Fairfax_2014_IFN24	ENSG00000063438	G	1.21244e-07	-0.112159	0.00060622	A	+	5	405576	AHRR	1
5:408529:C:T	eQTLcatalogue	Fairfax_2014_IFN24	ENSG00000063438	C	1.47303e-07	-0.110684	0.000736515	T	+	5	408529	AHRR	1
5:410943:A:G	eQTLcatalogue	Fairfax_2014_IFN24	ENSG00000063438	A	1.46677e-07	-0.110684	0.000733385	G	+	5	410943	AHRR	1
5:411361:A:G	eQTLcatalogue	Fairfax_2014_IFN24	ENSG00000063438	G	1.46677e-07	-0.110684	0.000733385	A	+	5	411361	AHRR	1
5:412112:C:T	eQTLcatalogue	Fairfax_2014_IFN24	ENSG00000063438	C	1.3967e-07	-0.110931	0.00069835	T	+	5	412112	AHRR	1
5:413591:A:G	eQTLcatalogue	Fairfax_2014_IFN24	ENSG00000063438	G	1.70088e-07	-0.110506	0.00085044	A	+	5	413591	AHRR	1
5:416118:A:G	eQTLcatalogue	Fairfax_2014_IFN24	ENSG00000063438	G	4.04492e-09	-0.126347	2.02246e-05	A	+	5	416118	AHRR	1
5:416672:A:G	eQTLcatalogue	Fairfax_2014_IFN24	ENSG00000063438	G	3.86968e-09	-0.126447	1.93484e-05	A	+	5	416672	AHRR	1
5:418093:A:G	eQTLcatalogue	Fairfax_2014_IFN24	ENSG00000063438	A	4.20504e-10	-0.181169	2.10252e-06	G	+	5	418093	AHRR	1
5:418494:A:G	eQTLcatalogue	Fairfax_2014_IFN24	ENSG00000063438	A	3.43321e-09	-0.126552	1.71661e-05	G	+	5	418494	AHRR	1
5:421193:C:G	eQTLcatalogue	Fairfax_2014_IFN24	ENSG00000063438	G	6.61195e-09	-0.124516	3.30598e-05	C	+	5	421193	AHRR	1
5:421403:A:G	eQTLcatalogue	Fairfax_2014_IFN24	ENSG00000063438	G	4.80025e-09	-0.125871	2.40012e-05	A	+	5	421403	AHRR	1
5:421426:A:C	eQTLcatalogue	Fairfax_2014_IFN24	ENSG00000063438	A	5.56561e-10	-0.183334	2.78281e-06	C	+	5	421426	AHRR	1
5:421455:G:T	eQTLcatalogue	Fairfax_2014_IFN24	ENSG00000063438	G	3.12553e-09	-0.126195	1.56276e-05	T	+	5	421455	AHRR	1
5:422178:A:G	eQTLcatalogue	Fairfax_2014_IFN24	ENSG00000063438	G	4.61955e-15	-0.157054	2.30977e-11	A	+	5	422178	AHRR	1
5:423169:C:T	eQTLcatalogue	Fairfax_2014_IFN24	ENSG00000063438	C	4.58428e-15	-0.156649	2.29214e-11	T	+	5	423169	AHRR	1
5:423595:C:T	eQTLcatalogue	Fairfax_2014_IFN24	ENSG00000063438	C	4.51248e-15	-0.156645	2.25624e-11	T	+	5	423595	AHRR	1
5:423671:C:T	eQTLcatalogue	Fairfax_2014_IFN24	ENSG00000063438	C	4.48187e-15	-0.156652	2.24093e-11	T	+	5	423671	AHRR	1
5:423906:A:G	eQTLcatalogue	Fairfax_2014_IFN24	ENSG00000063438	G	4.46294e-15	-0.156653	2.23147e-11	A	+	5	423906	AHRR	1
5:428236:A:C	eQTLcatalogue	Fairfax_2014_IFN24	ENSG00000063438	C	3.6099e-15	-0.156434	1.80495e-11	A	+	5	428236	AHRR	1
5:429124:C:G	eQTLcatalogue	Fairfax_2014_IFN24	ENSG00000063438	C	3.46919e-15	-0.156543	1.73459e-11	G	+	5	429124	AHRR	1
5:429818:C:G	eQTLcatalogue	Fairfax_2014_IFN24	ENSG00000063438	C	3.34507e-15	-0.156618	1.67253e-11	G	+	5	429818	AHRR	1
5:430059:A:G	eQTLcatalogue	Fairfax_2014_IFN24	ENSG00000063438	G	3.33771e-15	-0.156616	1.66885e-11	A	+	5	430059	AHRR	1
5:430217:C:T	eQTLcatalogue	Fairfax_2014_IFN24	ENSG00000063438	C	2.00454e-10	-0.125546	1.00227e-06	T	+	5	430217	AHRR	1
5:434722:C:G	eQTLcatalogue	Fairfax_2014_IFN24	ENSG00000063438	G	1.35066e-15	-0.157758	6.7533e-12	C	+	5	434722	AHRR	1
5:436981:A:G	eQTLcatalogue	Fairfax_2014_IFN24	ENSG00000063438	A	2.67938e-13	-0.151191	1.33969e-09	G	+	5	436981	AHRR	1
5:437542:C:T	eQTLcatalogue	Fairfax_2014_IFN24	ENSG00000063438	T	3.47958e-15	-0.156305	1.73979e-11	C	+	5	437542	AHRR	1
5:437586:A:G	eQTLcatalogue	Fairfax_2014_IFN24	ENSG00000063438	G	3.48161e-15	-0.156304	1.7408e-11	A	+	5	437586	AHRR	1
5:437667:A:G	eQTLcatalogue	Fairfax_2014_IFN24	ENSG00000063438	G	3.47823e-15	-0.156307	1.73911e-11	A	+	5	437667	AHRR	1
5:437862:C:G	eQTLcatalogue	Fairfax_2014_IFN24	ENSG00000063438	G	3.48273e-15	-0.156304	1.74137e-11	C	+	5	437862	AHRR	1
7:44157825:C:T	eQTLcatalogue	Fairfax_2014_IFN24	ENSG00000106628	T	2.62713e-08	0.0851054	0.000131356	T	+	7	44157825	POLD2	1
7:44157825:C:T	eQTLcatalogue	Fairfax_2014_IFN24	ENSG00000106628	T	4.06726e-06	0.0701424	0.0203363	T	+	7	44157825	POLD2	1
10:126679510:A:G	eQTLcatalogue	Fairfax_2014_IFN24	ENSG00000019995	A	4.87057e-39	0.453878	2.43529e-35	A	+	10	126679510	ZRANB1	1
10:126679510:A:G	eQTLcatalogue	Fairfax_2014_IFN24	ENSG00000175029	A	3.51517e-07	0.162244	0.00175758	A	+	10	126679510	CTBP2	1
10:126685539:A:G	eQTLcatalogue	Fairfax_2014_IFN24	ENSG00000019995	G	5.4918e-30	0.391963	2.7459e-26	G	+	10	126685539	ZRANB1	1
10:126685539:A:G	eQTLcatalogue	Fairfax_2014_IFN24	ENSG00000175029	G	1.42096e-06	0.148715	0.0071048	G	+	10	126685539	CTBP2	1
10:126687613:C:T	eQTLcatalogue	Fairfax_2014_IFN24	ENSG00000019995	T	5.57791e-30	0.391853	2.78895e-26	T	+	10	126687613	ZRANB1	1
10:126687613:C:T	eQTLcatalogue	Fairfax_2014_IFN24	ENSG00000175029	T	1.43994e-06	0.14861	0.0071997	T	+	10	126687613	CTBP2	1
10:126711259:A:G	eQTLcatalogue	Fairfax_2014_IFN24	ENSG00000019995	A	2.45049e-18	0.310296	1.22525e-14	A	+	10	126711259	ZRANB1	1
10:126713026:A:G	eQTLcatalogue	Fairfax_2014_IFN24	ENSG00000019995	A	3.70462e-18	0.308328	1.85231e-14	A	+	10	126713026	ZRANB1	1
10:126714169:C:T	eQTLcatalogue	Fairfax_2014_IFN24	ENSG00000019995	C	1.47926e-17	0.302622	7.3963e-14	C	+	10	126714169	ZRANB1	1
10:126718244:C:T	eQTLcatalogue	Fairfax_2014_IFN24	ENSG00000019995	C	5.64647e-18	0.305854	2.82324e-14	C	+	10	126718244	ZRANB1	1
10:126721819:A:C	eQTLcatalogue	Fairfax_2014_IFN24	ENSG00000019995	C	5.64218e-18	0.305837	2.82109e-14	C	+	10	126721819	ZRANB1	1
10:126722149:C:G	eQTLcatalogue	Fairfax_2014_IFN24	ENSG00000019995	C	5.62129e-17	0.2961	2.81064e-13	C	+	10	126722149	ZRANB1	1
10:126722453:C:T	eQTLcatalogue	Fairfax_2014_IFN24	ENSG00000019995	C	5.64964e-18	0.305805	2.82482e-14	C	+	10	126722453	ZRANB1	1
10:126723939:A:G	eQTLcatalogue	Fairfax_2014_IFN24	ENSG00000019995	G	5.73745e-18	0.305784	2.86872e-14	G	+	10	126723939	ZRANB1	1
10:126726979:C:T	eQTLcatalogue	Fairfax_2014_IFN24	ENSG00000019995	C	1.25197e-17	0.301699	6.25985e-14	C	+	10	126726979	ZRANB1	1
10:126727268:A:C	eQTLcatalogue	Fairfax_2014_IFN24	ENSG00000019995	A	1.32799e-17	0.301339	6.63995e-14	A	+	10	126727268	ZRANB1	1
10:126730827:A:G	eQTLcatalogue	Fairfax_2014_IFN24	ENSG00000019995	A	1.23508e-17	0.3028	6.1754e-14	A	+	10	126730827	ZRANB1	1
10:126733276:C:T	eQTLcatalogue	Fairfax_2014_IFN24	ENSG00000019995	C	1.73732e-17	0.305378	8.6866e-14	C	+	10	126733276	ZRANB1	1
10:126737566:C:G	eQTLcatalogue	Fairfax_2014_IFN24	ENSG00000019995	G	2.96123e-17	0.30384	1.48062e-13	G	+	10	126737566	ZRANB1	1
11:457879:C:T	eQTLcatalogue	Fairfax_2014_IFN24	ENSG00000023191	C	9.77689e-12	-0.203216	4.88844e-08	C	-	11	457879	RNH1	1
11:458595:A:G	eQTLcatalogue	Fairfax_2014_IFN24	ENSG00000023191	G	1.98929e-14	-0.152107	9.94645e-11	G	-	11	458595	RNH1	1
11:458595:A:G	eQTLcatalogue	Fairfax_2014_IFN24	ENSG00000174775	G	1.21978e-07	-0.109033	0.00060989	G	-	11	458595	HRAS	1
11:460765:A:G	eQTLcatalogue	Fairfax_2014_IFN24	ENSG00000023191	A	7.86523e-16	-0.154191	3.93262e-12	A	-	11	460765	RNH1	1
11:460765:A:G	eQTLcatalogue	Fairfax_2014_IFN24	ENSG00000174775	A	1.8623e-06	-0.0953352	0.0093115	A	-	11	460765	HRAS	1
11:462684:C:T	eQTLcatalogue	Fairfax_2014_IFN24	ENSG00000023191	C	1.86011e-14	-0.151882	9.30055e-11	C	-	11	462684	RNH1	1
11:462684:C:T	eQTLcatalogue	Fairfax_2014_IFN24	ENSG00000174775	C	1.08892e-07	-0.109169	0.00054446	C	-	11	462684	HRAS	1
11:462855:A:G	eQTLcatalogue	Fairfax_2014_IFN24	ENSG00000023191	G	6.70405e-16	-0.15448	3.35203e-12	G	-	11	462855	RNH1	1
11:462855:A:G	eQTLcatalogue	Fairfax_2014_IFN24	ENSG00000174775	G	1.87278e-06	-0.0952812	0.0093639	G	-	11	462855	HRAS	1
11:467368:A:G	eQTLcatalogue	Fairfax_2014_IFN24	ENSG00000023191	A	4.27072e-16	-0.155177	2.13536e-12	A	-	11	467368	RNH1	1
11:467368:A:G	eQTLcatalogue	Fairfax_2014_IFN24	ENSG00000174775	A	1.93126e-06	-0.0950015	0.0096563	A	-	11	467368	HRAS	1
11:473300:G:T	eQTLcatalogue	Fairfax_2014_IFN24	ENSG00000023191	G	3.07982e-16	-0.155472	1.53991e-12	G	-	11	473300	RNH1	1
11:473300:G:T	eQTLcatalogue	Fairfax_2014_IFN24	ENSG00000174775	G	2.06016e-06	-0.0945098	0.0103008	G	-	11	473300	HRAS	1
11:477623:C:T	eQTLcatalogue	Fairfax_2014_IFN24	ENSG00000023191	C	2.95423e-16	-0.155366	1.47711e-12	C	-	11	477623	RNH1	1
11:477623:C:T	eQTLcatalogue	Fairfax_2014_IFN24	ENSG00000174775	C	2.15492e-06	-0.0942168	0.0107746	C	-	11	477623	HRAS	1
11:484469:C:T	eQTLcatalogue	Fairfax_2014_IFN24	ENSG00000023191	C	2.66082e-16	-0.155968	1.33041e-12	C	-	11	484469	RNH1	1
11:484469:C:T	eQTLcatalogue	Fairfax_2014_IFN24	ENSG00000174775	C	2.57961e-06	-0.0937417	0.0128981	C	-	11	484469	HRAS	1
11:486414:A:G	eQTLcatalogue	Fairfax_2014_IFN24	ENSG00000023191	G	2.557e-16	-0.156223	1.2785e-12	G	-	11	486414	RNH1	1
11:486414:A:G	eQTLcatalogue	Fairfax_2014_IFN24	ENSG00000174775	G	2.97023e-06	-0.0932856	0.0148511	G	-	11	486414	HRAS	1
11:487101:C:T	eQTLcatalogue	Fairfax_2014_IFN24	ENSG00000023191	C	2.61832e-16	-0.156145	1.30916e-12	C	-	11	487101	RNH1	1
11:487101:C:T	eQTLcatalogue	Fairfax_2014_IFN24	ENSG00000174775	C	3.04327e-06	-0.0931722	0.0152164	C	-	11	487101	HRAS	1
11:487136:A:G	eQTLcatalogue	Fairfax_2014_IFN24	ENSG00000023191	G	1.00341e-14	-0.152199	5.01705e-11	G	-	11	487136	RNH1	1
11:487136:A:G	eQTLcatalogue	Fairfax_2014_IFN24	ENSG00000174775	G	8.7033e-08	-0.109166	0.000435165	G	-	11	487136	HRAS	1
11:487201:C:T	eQTLcatalogue	Fairfax_2014_IFN24	ENSG00000023191	T	2.61233e-16	-0.156169	1.30617e-12	T	-	11	487201	RNH1	1
11:487201:C:T	eQTLcatalogue	Fairfax_2014_IFN24	ENSG00000174775	T	3.0563e-06	-0.0931665	0.0152815	T	-	11	487201	HRAS	1
11:490035:C:T	eQTLcatalogue	Fairfax_2014_IFN24	ENSG00000023191	C	2.30736e-18	-0.180958	1.15368e-14	C	-	11	490035	RNH1	1
11:490035:C:T	eQTLcatalogue	Fairfax_2014_IFN24	ENSG00000099849	C	5.74693e-06	0.156	0.0287346	C	+	11	490035	RASSF7	1
11:490035:C:T	eQTLcatalogue	Fairfax_2014_IFN24	ENSG00000174775	C	6.23321e-06	-0.0986199	0.0311661	C	-	11	490035	HRAS	1
11:491334:A:C	eQTLcatalogue	Fairfax_2014_IFN24	ENSG00000023191	A	9.2924e-17	-0.157867	4.6462e-13	A	-	11	491334	RNH1	1
11:491334:A:C	eQTLcatalogue	Fairfax_2014_IFN24	ENSG00000174775	A	4.47471e-06	-0.0913781	0.0223736	A	-	11	491334	HRAS	1
11:494662:A:G	eQTLcatalogue	Fairfax_2014_IFN24	ENSG00000023191	G	9.97846e-17	-0.157612	4.98923e-13	G	-	11	494662	RNH1	1
11:494662:A:G	eQTLcatalogue	Fairfax_2014_IFN24	ENSG00000174775	G	5.05534e-06	-0.0908205	0.0252767	G	-	11	494662	HRAS	1
11:495699:A:C	eQTLcatalogue	Fairfax_2014_IFN24	ENSG00000023191	A	9.96992e-17	-0.157616	4.98496e-13	A	-	11	495699	RNH1	1
11:495699:A:C	eQTLcatalogue	Fairfax_2014_IFN24	ENSG00000174775	A	5.05613e-06	-0.0908213	0.0252807	A	-	11	495699	HRAS	1
11:495892:C:G	eQTLcatalogue	Fairfax_2014_IFN24	ENSG00000023191	C	9.96992e-17	-0.157616	4.98496e-13	C	-	11	495892	RNH1	1
11:495892:C:G	eQTLcatalogue	Fairfax_2014_IFN24	ENSG00000174775	C	5.05613e-06	-0.0908213	0.0252807	C	-	11	495892	HRAS	1
11:496193:G:T	eQTLcatalogue	Fairfax_2014_IFN24	ENSG00000023191	T	1.00823e-16	-0.15785	5.04115e-13	T	-	11	496193	RNH1	1
11:496193:G:T	eQTLcatalogue	Fairfax_2014_IFN24	ENSG00000174775	T	5.60757e-06	-0.0905476	0.0280378	T	-	11	496193	HRAS	1
11:501468:A:G	eQTLcatalogue	Fairfax_2014_IFN24	ENSG00000023191	G	9.95525e-17	-0.157633	4.97763e-13	G	-	11	501468	RNH1	1
11:501468:A:G	eQTLcatalogue	Fairfax_2014_IFN24	ENSG00000174775	G	5.06285e-06	-0.090824	0.0253142	G	-	11	501468	HRAS	1
11:502371:A:G	eQTLcatalogue	Fairfax_2014_IFN24	ENSG00000023191	G	9.88965e-17	-0.157654	4.94483e-13	G	-	11	502371	RNH1	1
11:502371:A:G	eQTLcatalogue	Fairfax_2014_IFN24	ENSG00000174775	G	5.05857e-06	-0.0908316	0.0252928	G	-	11	502371	HRAS	1
11:503385:C:G	eQTLcatalogue	Fairfax_2014_IFN24	ENSG00000023191	C	9.72132e-17	-0.157755	4.86066e-13	C	-	11	503385	RNH1	1
11:503385:C:G	eQTLcatalogue	Fairfax_2014_IFN24	ENSG00000174775	C	5.05803e-06	-0.0908699	0.0252902	C	-	11	503385	HRAS	1
11:503710:C:T	eQTLcatalogue	Fairfax_2014_IFN24	ENSG00000023191	C	9.71352e-17	-0.157767	4.85676e-13	C	-	11	503710	RNH1	1
11:503710:C:T	eQTLcatalogue	Fairfax_2014_IFN24	ENSG00000174775	C	5.06042e-06	-0.0908742	0.0253021	C	-	11	503710	HRAS	1
11:504411:C:G	eQTLcatalogue	Fairfax_2014_IFN24	ENSG00000023191	C	9.66484e-17	-0.157834	4.83242e-13	C	-	11	504411	RNH1	1
11:504411:C:G	eQTLcatalogue	Fairfax_2014_IFN24	ENSG00000174775	C	5.04878e-06	-0.0909164	0.0252439	C	-	11	504411	HRAS	1
11:506229:C:T	eQTLcatalogue	Fairfax_2014_IFN24	ENSG00000023191	C	9.56032e-17	-0.15796	4.78016e-13	C	-	11	506229	RNH1	1
11:506229:C:T	eQTLcatalogue	Fairfax_2014_IFN24	ENSG00000174775	C	5.08321e-06	-0.090948	0.025416	C	-	11	506229	HRAS	1
11:506442:G:T	eQTLcatalogue	Fairfax_2014_IFN24	ENSG00000023191	G	9.51815e-17	-0.157993	4.75908e-13	G	-	11	506442	RNH1	1
11:506442:G:T	eQTLcatalogue	Fairfax_2014_IFN24	ENSG00000174775	G	5.08493e-06	-0.090961	0.0254247	G	-	11	506442	HRAS	1
11:506596:C:T	eQTLcatalogue	Fairfax_2014_IFN24	ENSG00000023191	C	9.51858e-17	-0.157996	4.75929e-13	C	-	11	506596	RNH1	1
11:506596:C:T	eQTLcatalogue	Fairfax_2014_IFN24	ENSG00000174775	C	5.08288e-06	-0.090964	0.0254144	C	-	11	506596	HRAS	1
14:74480794:C:G	eQTLcatalogue	Fairfax_2014_IFN24	ENSG00000119723	G	7.98409e-07	-0.0941203	0.00399205	C	+	14	74480794	COQ6	1
14:74480794:C:G	eQTLcatalogue	Fairfax_2014_IFN24	ENSG00000119723	G	2.11478e-06	-0.0748152	0.0105739	C	+	14	74480794	COQ6	1
14:74485133:C:T	eQTLcatalogue	Fairfax_2014_IFN24	ENSG00000119723	C	8.60982e-07	-0.0935518	0.00430491	T	+	14	74485133	COQ6	1
14:74485133:C:T	eQTLcatalogue	Fairfax_2014_IFN24	ENSG00000119723	C	2.19634e-06	-0.0744619	0.0109817	T	+	14	74485133	COQ6	1
2:68385097:A:G	eQTLcatalogue	Fairfax_2014_LPS24	ENSG00000243667	A	2.50603e-06	-0.072081	0.0125301	G	+	2	68385097	WDR92	1
2:68385097:A:G	eQTLcatalogue	Fairfax_2014_LPS24	ENSG00000221823	A	7.78794e-20	0.164689	3.89397e-16	G	-	2	68385097	PPP3R1	1
2:68393144:A:T	eQTLcatalogue	Fairfax_2014_LPS24	ENSG00000243667	T	4.20389e-06	-0.0711708	0.0210194	A	+	2	68393144	WDR92	1
2:68393144:A:T	eQTLcatalogue	Fairfax_2014_LPS24	ENSG00000221823	T	9.38147e-22	0.173646	4.69073e-18	A	-	2	68393144	PPP3R1	1
2:68394184:C:T	eQTLcatalogue	Fairfax_2014_LPS24	ENSG00000243667	C	4.13331e-06	-0.0711769	0.0206665	T	+	2	68394184	WDR92	1
2:68394184:C:T	eQTLcatalogue	Fairfax_2014_LPS24	ENSG00000221823	C	8.55181e-22	0.173682	4.27591e-18	T	-	2	68394184	PPP3R1	1
2:68395631:A:G	eQTLcatalogue	Fairfax_2014_LPS24	ENSG00000243667	G	4.03941e-06	-0.0711793	0.020197	A	+	2	68395631	WDR92	1
2:68395631:A:G	eQTLcatalogue	Fairfax_2014_LPS24	ENSG00000221823	G	7.79485e-22	0.173663	3.89743e-18	A	-	2	68395631	PPP3R1	1
2:68398919:C:G	eQTLcatalogue	Fairfax_2014_LPS24	ENSG00000243667	G	4.05107e-06	-0.0711546	0.0202553	C	+	2	68398919	WDR92	1
2:68398919:C:G	eQTLcatalogue	Fairfax_2014_LPS24	ENSG00000221823	G	8.2939e-22	0.173525	4.14695e-18	C	-	2	68398919	PPP3R1	1
2:68399190:C:T	eQTLcatalogue	Fairfax_2014_LPS24	ENSG00000243667	C	3.87978e-06	-0.0711101	0.0193989	T	+	2	68399190	WDR92	1
2:68399190:C:T	eQTLcatalogue	Fairfax_2014_LPS24	ENSG00000221823	C	6.58875e-22	0.173459	3.29437e-18	T	-	2	68399190	PPP3R1	1
2:68402012:G:T	eQTLcatalogue	Fairfax_2014_LPS24	ENSG00000243667	G	3.79186e-06	-0.0709948	0.0189593	T	+	2	68402012	WDR92	1
2:68402012:G:T	eQTLcatalogue	Fairfax_2014_LPS24	ENSG00000221823	G	5.76461e-22	0.173219	2.88231e-18	T	-	2	68402012	PPP3R1	1
2:68402830:C:G	eQTLcatalogue	Fairfax_2014_LPS24	ENSG00000243667	G	3.79005e-06	-0.070998	0.0189502	C	+	2	68402830	WDR92	1
2:68402830:C:G	eQTLcatalogue	Fairfax_2014_LPS24	ENSG00000221823	G	5.77527e-22	0.17322	2.88763e-18	C	-	2	68402830	PPP3R1	1
2:68410372:A:C	eQTLcatalogue	Fairfax_2014_LPS24	ENSG00000243667	C	3.70003e-06	-0.0711735	0.0185002	A	+	2	68410372	WDR92	1
2:68410372:A:C	eQTLcatalogue	Fairfax_2014_LPS24	ENSG00000221823	C	5.46964e-22	0.173554	2.73482e-18	A	-	2	68410372	PPP3R1	1
2:68410660:G:T	eQTLcatalogue	Fairfax_2014_LPS24	ENSG00000243667	T	3.70276e-06	-0.0711727	0.0185138	G	+	2	68410660	WDR92	1
2:68410660:G:T	eQTLcatalogue	Fairfax_2014_LPS24	ENSG00000221823	T	5.43978e-22	0.173567	2.71989e-18	G	-	2	68410660	PPP3R1	1
2:68411414:A:G	eQTLcatalogue	Fairfax_2014_LPS24	ENSG00000243667	G	3.70503e-06	-0.071173	0.0185252	A	+	2	68411414	WDR92	1
2:68411414:A:G	eQTLcatalogue	Fairfax_2014_LPS24	ENSG00000221823	G	5.45134e-22	0.173569	2.72567e-18	A	-	2	68411414	PPP3R1	1
2:68418868:A:T	eQTLcatalogue	Fairfax_2014_LPS24	ENSG00000243667	A	3.6853e-06	-0.0712347	0.0184265	T	+	2	68418868	WDR92	1
2:68418868:A:T	eQTLcatalogue	Fairfax_2014_LPS24	ENSG00000221823	A	5.40676e-22	0.173692	2.70338e-18	T	-	2	68418868	PPP3R1	1
2:68419487:A:G	eQTLcatalogue	Fairfax_2014_LPS24	ENSG00000243667	G	3.68921e-06	-0.0712333	0.018446	A	+	2	68419487	WDR92	1
2:68419487:A:G	eQTLcatalogue	Fairfax_2014_LPS24	ENSG00000221823	G	5.39117e-22	0.173701	2.69559e-18	A	-	2	68419487	PPP3R1	1
2:68420070:G:T	eQTLcatalogue	Fairfax_2014_LPS24	ENSG00000243667	G	3.68617e-06	-0.0712368	0.0184308	T	+	2	68420070	WDR92	1
2:68420070:G:T	eQTLcatalogue	Fairfax_2014_LPS24	ENSG00000221823	G	5.38941e-22	0.173704	2.69471e-18	T	-	2	68420070	PPP3R1	1
2:68421049:A:G	eQTLcatalogue	Fairfax_2014_LPS24	ENSG00000243667	G	3.68761e-06	-0.0712354	0.018438	A	+	2	68421049	WDR92	1
2:68421049:A:G	eQTLcatalogue	Fairfax_2014_LPS24	ENSG00000221823	G	5.39597e-22	0.173702	2.69798e-18	A	-	2	68421049	PPP3R1	1
2:68422771:A:G	eQTLcatalogue	Fairfax_2014_LPS24	ENSG00000243667	G	3.68351e-06	-0.0712366	0.0184175	A	+	2	68422771	WDR92	1
2:68422771:A:G	eQTLcatalogue	Fairfax_2014_LPS24	ENSG00000221823	G	5.40651e-22	0.173693	2.70325e-18	A	-	2	68422771	PPP3R1	1
2:68423530:A:G	eQTLcatalogue	Fairfax_2014_LPS24	ENSG00000243667	G	3.68839e-06	-0.0712286	0.0184419	A	+	2	68423530	WDR92	1
2:68423530:A:G	eQTLcatalogue	Fairfax_2014_LPS24	ENSG00000221823	G	5.4075e-22	0.173683	2.70375e-18	A	-	2	68423530	PPP3R1	1
2:68430925:C:T	eQTLcatalogue	Fairfax_2014_LPS24	ENSG00000243667	C	3.74964e-06	-0.0710835	0.0187482	T	+	2	68430925	WDR92	1
2:68430925:C:T	eQTLcatalogue	Fairfax_2014_LPS24	ENSG00000221823	C	5.68832e-22	0.173372	2.84416e-18	T	-	2	68430925	PPP3R1	1
2:68431259:A:G	eQTLcatalogue	Fairfax_2014_LPS24	ENSG00000243667	G	3.75362e-06	-0.0710739	0.0187681	A	+	2	68431259	WDR92	1
2:68431259:A:G	eQTLcatalogue	Fairfax_2014_LPS24	ENSG00000221823	G	5.68952e-22	0.173357	2.84476e-18	A	-	2	68431259	PPP3R1	1
2:68433831:A:G	eQTLcatalogue	Fairfax_2014_LPS24	ENSG00000243667	G	3.7904e-06	-0.0709947	0.018952	A	+	2	68433831	WDR92	1
2:68433831:A:G	eQTLcatalogue	Fairfax_2014_LPS24	ENSG00000221823	G	5.76092e-22	0.173217	2.88046e-18	A	-	2	68433831	PPP3R1	1
2:68435431:C:G	eQTLcatalogue	Fairfax_2014_LPS24	ENSG00000243667	C	3.56954e-06	-0.0713998	0.0178477	G	+	2	68435431	WDR92	1
2:68435431:C:G	eQTLcatalogue	Fairfax_2014_LPS24	ENSG00000221823	C	4.76286e-22	0.174057	2.38143e-18	G	-	2	68435431	PPP3R1	1
2:68438614:C:T	eQTLcatalogue	Fairfax_2014_LPS24	ENSG00000243667	C	3.11323e-06	-0.0722028	0.0155661	T	+	2	68438614	WDR92	1
2:68438614:C:T	eQTLcatalogue	Fairfax_2014_LPS24	ENSG00000221823	C	3.34098e-22	0.175551	1.67049e-18	T	-	2	68438614	PPP3R1	1
2:68439960:C:T	eQTLcatalogue	Fairfax_2014_LPS24	ENSG00000243667	C	3.0585e-06	-0.0724898	0.0152925	T	+	2	68439960	WDR92	1
2:68439960:C:T	eQTLcatalogue	Fairfax_2014_LPS24	ENSG00000221823	C	3.43431e-22	0.176072	1.71716e-18	T	-	2	68439960	PPP3R1	1
2:68443651:A:G	eQTLcatalogue	Fairfax_2014_LPS24	ENSG00000243667	A	1.96874e-06	-0.0743472	0.0098437	G	+	2	68443651	WDR92	1
2:68443651:A:G	eQTLcatalogue	Fairfax_2014_LPS24	ENSG00000221823	A	3.49667e-22	0.177262	1.74834e-18	G	-	2	68443651	PPP3R1	1
2:68443835:A:T	eQTLcatalogue	Fairfax_2014_LPS24	ENSG00000243667	A	2.72081e-06	-0.0731893	0.013604	T	+	2	68443835	WDR92	1
2:68443835:A:T	eQTLcatalogue	Fairfax_2014_LPS24	ENSG00000221823	A	2.52734e-22	0.177384	1.26367e-18	T	-	2	68443835	PPP3R1	1
2:68446936:C:T	eQTLcatalogue	Fairfax_2014_LPS24	ENSG00000243667	C	2.43387e-06	-0.0736756	0.0121694	T	+	2	68446936	WDR92	1
2:68446936:C:T	eQTLcatalogue	Fairfax_2014_LPS24	ENSG00000221823	C	2.159e-22	0.177982	1.0795e-18	T	-	2	68446936	PPP3R1	1
2:68457573:C:T	eQTLcatalogue	Fairfax_2014_LPS24	ENSG00000243667	C	1.73233e-06	-0.0756018	0.00866165	T	+	2	68457573	WDR92	1
2:68457573:C:T	eQTLcatalogue	Fairfax_2014_LPS24	ENSG00000221823	C	7.33228e-23	0.181833	3.66614e-19	T	-	2	68457573	PPP3R1	1
2:68457854:A:G	eQTLcatalogue	Fairfax_2014_LPS24	ENSG00000243667	A	1.98936e-06	-0.0753145	0.0099468	G	+	2	68457854	WDR92	1
2:68457854:A:G	eQTLcatalogue	Fairfax_2014_LPS24	ENSG00000221823	A	7.03764e-23	0.182232	3.51882e-19	G	-	2	68457854	PPP3R1	1
2:68463612:A:G	eQTLcatalogue	Fairfax_2014_LPS24	ENSG00000243667	G	1.45765e-06	-0.0765214	0.00728825	A	+	2	68463612	WDR92	1
2:68463612:A:G	eQTLcatalogue	Fairfax_2014_LPS24	ENSG00000221823	G	4.89023e-23	0.183416	2.44511e-19	A	-	2	68463612	PPP3R1	1
2:68467910:A:C	eQTLcatalogue	Fairfax_2014_LPS24	ENSG00000243667	A	1.36333e-06	-0.0768492	0.00681665	C	+	2	68467910	WDR92	1
2:68467910:A:C	eQTLcatalogue	Fairfax_2014_LPS24	ENSG00000221823	A	4.19297e-23	0.183957	2.09648e-19	C	-	2	68467910	PPP3R1	1
2:68475595:A:C	eQTLcatalogue	Fairfax_2014_LPS24	ENSG00000243667	C	1.16501e-06	-0.0775585	0.00582505	A	+	2	68475595	WDR92	1
2:68475595:A:C	eQTLcatalogue	Fairfax_2014_LPS24	ENSG00000221823	C	3.06084e-23	0.185006	1.53042e-19	A	-	2	68475595	PPP3R1	1
2:68477248:C:T	eQTLcatalogue	Fairfax_2014_LPS24	ENSG00000243667	T	1.10933e-06	-0.0780168	0.00554665	C	+	2	68477248	WDR92	1
2:68477248:C:T	eQTLcatalogue	Fairfax_2014_LPS24	ENSG00000221823	T	2.92128e-23	0.185817	1.46064e-19	C	-	2	68477248	PPP3R1	1
2:68478919:A:G	eQTLcatalogue	Fairfax_2014_LPS24	ENSG00000243667	A	1.39367e-06	-0.0776805	0.00696835	G	+	2	68478919	WDR92	1
2:68478919:A:G	eQTLcatalogue	Fairfax_2014_LPS24	ENSG00000221823	A	1.21864e-22	0.184379	6.0932e-19	G	-	2	68478919	PPP3R1	1
2:238877170:C:G	eQTLcatalogue	Fairfax_2014_LPS24	ENSG00000184182	C	7.40518e-08	0.0774905	0.000370259	C	+	2	238877170	UBE2F	1
2:238877409:A:C	eQTLcatalogue	Fairfax_2014_LPS24	ENSG00000184182	A	5.48409e-08	0.0780233	0.000274205	A	+	2	238877409	UBE2F	1
2:238893362:C:T	eQTLcatalogue	Fairfax_2014_LPS24	ENSG00000184182	T	7.63399e-08	0.0780193	0.0003817	T	+	2	238893362	UBE2F	1
2:238895507:A:G	eQTLcatalogue	Fairfax_2014_LPS24	ENSG00000184182	G	7.80116e-08	0.0781314	0.000390058	G	+	2	238895507	UBE2F	1
2:238907642:A:C	eQTLcatalogue	Fairfax_2014_LPS24	ENSG00000184182	A	8.5147e-08	0.0786579	0.000425735	A	+	2	238907642	UBE2F	1
2:238909269:A:G	eQTLcatalogue	Fairfax_2014_LPS24	ENSG00000184182	A	8.6354e-08	0.078729	0.00043177	A	+	2	238909269	UBE2F	1
2:238910663:C:T	eQTLcatalogue	Fairfax_2014_LPS24	ENSG00000184182	T	8.76512e-08	0.0787716	0.000438256	T	+	2	238910663	UBE2F	1
2:238912120:A:C	eQTLcatalogue	Fairfax_2014_LPS24	ENSG00000184182	A	8.87405e-08	0.0787936	0.000443702	A	+	2	238912120	UBE2F	1
2:238912478:A:G	eQTLcatalogue	Fairfax_2014_LPS24	ENSG00000184182	G	8.87452e-08	0.0788295	0.000443726	G	+	2	238912478	UBE2F	1
2:238922585:G:T	eQTLcatalogue	Fairfax_2014_LPS24	ENSG00000184182	G	9.53746e-08	0.0789852	0.000476873	G	+	2	238922585	UBE2F	1
2:238930632:A:G	eQTLcatalogue	Fairfax_2014_LPS24	ENSG00000184182	A	6.71516e-08	0.0798863	0.000335758	A	+	2	238930632	UBE2F	1
2:238932389:A:G	eQTLcatalogue	Fairfax_2014_LPS24	ENSG00000184182	G	1.0209e-07	0.0790819	0.00051045	G	+	2	238932389	UBE2F	1
2:238939370:C:T	eQTLcatalogue	Fairfax_2014_LPS24	ENSG00000184182	C	6.93264e-07	0.0732386	0.00346632	C	+	2	238939370	UBE2F	1
3:153992586:A:G	eQTLcatalogue	Fairfax_2014_LPS24	ENSG00000174953	A	7.35129e-06	-0.0740137	0.0367564	G	+	3	153992586	DHX36	1
3:153992586:A:G	eQTLcatalogue	Fairfax_2014_LPS24	ENSG00000174953	A	4.60953e-08	-0.0904567	0.000230477	G	+	3	153992586	DHX36	1
3:154004009:C:T	eQTLcatalogue	Fairfax_2014_LPS24	ENSG00000174953	T	4.41562e-08	-0.0907798	0.000220781	C	+	3	154004009	DHX36	1
3:154009933:C:T	eQTLcatalogue	Fairfax_2014_LPS24	ENSG00000174953	T	7.35426e-06	-0.0740378	0.0367713	C	+	3	154009933	DHX36	1
3:154009933:C:T	eQTLcatalogue	Fairfax_2014_LPS24	ENSG00000174953	T	4.53867e-08	-0.0905312	0.000226933	C	+	3	154009933	DHX36	1
3:154036196:A:G	eQTLcatalogue	Fairfax_2014_LPS24	ENSG00000174953	A	7.91764e-06	-0.0739339	0.0395882	G	+	3	154036196	DHX36	1
3:154036196:A:G	eQTLcatalogue	Fairfax_2014_LPS24	ENSG00000174953	A	3.28486e-08	-0.0916158	0.000164243	G	+	3	154036196	DHX36	1
3:154036657:C:T	eQTLcatalogue	Fairfax_2014_LPS24	ENSG00000174953	C	7.91443e-06	-0.0739514	0.0395722	T	+	3	154036657	DHX36	1
3:154036657:C:T	eQTLcatalogue	Fairfax_2014_LPS24	ENSG00000174953	C	3.25951e-08	-0.0916571	0.000162975	T	+	3	154036657	DHX36	1
3:154040273:A:G	eQTLcatalogue	Fairfax_2014_LPS24	ENSG00000174953	G	8.08977e-06	-0.073841	0.0404489	A	+	3	154040273	DHX36	1
3:154040273:A:G	eQTLcatalogue	Fairfax_2014_LPS24	ENSG00000174953	G	3.16801e-08	-0.0916925	0.0001584	A	+	3	154040273	DHX36	1
5:405576:A:G	eQTLcatalogue	Fairfax_2014_LPS24	ENSG00000063438	G	1.94644e-08	-0.136784	9.7322e-05	A	+	5	405576	AHRR	1
5:408529:C:T	eQTLcatalogue	Fairfax_2014_LPS24	ENSG00000063438	C	2.42879e-08	-0.135064	0.00012144	T	+	5	408529	AHRR	1
5:410943:A:G	eQTLcatalogue	Fairfax_2014_LPS24	ENSG00000063438	A	2.40378e-08	-0.135088	0.000120189	G	+	5	410943	AHRR	1
5:411361:A:G	eQTLcatalogue	Fairfax_2014_LPS24	ENSG00000063438	G	2.40378e-08	-0.135088	0.000120189	A	+	5	411361	AHRR	1
5:412112:C:T	eQTLcatalogue	Fairfax_2014_LPS24	ENSG00000063438	C	2.2947e-08	-0.135344	0.000114735	T	+	5	412112	AHRR	1
5:413591:A:G	eQTLcatalogue	Fairfax_2014_LPS24	ENSG00000063438	G	4.77636e-08	-0.132749	0.000238818	A	+	5	413591	AHRR	1
5:416118:A:G	eQTLcatalogue	Fairfax_2014_LPS24	ENSG00000063438	G	2.69416e-11	-0.162692	1.34708e-07	A	+	5	416118	AHRR	1
5:416672:A:G	eQTLcatalogue	Fairfax_2014_LPS24	ENSG00000063438	G	2.41286e-11	-0.163004	1.20643e-07	A	+	5	416672	AHRR	1
5:418093:A:G	eQTLcatalogue	Fairfax_2014_LPS24	ENSG00000063438	A	2.14686e-08	-0.186569	0.000107343	G	+	5	418093	AHRR	1
5:418494:A:G	eQTLcatalogue	Fairfax_2014_LPS24	ENSG00000063438	A	1.78337e-11	-0.163624	8.91685e-08	G	+	5	418494	AHRR	1
5:421193:C:G	eQTLcatalogue	Fairfax_2014_LPS24	ENSG00000063438	G	4.18196e-10	-0.152366	2.09098e-06	C	+	5	421193	AHRR	1
5:421403:A:G	eQTLcatalogue	Fairfax_2014_LPS24	ENSG00000063438	G	1.81505e-11	-0.16453	9.07525e-08	A	+	5	421403	AHRR	1
5:421426:A:C	eQTLcatalogue	Fairfax_2014_LPS24	ENSG00000063438	A	1.9553e-08	-0.190706	9.7765e-05	C	+	5	421426	AHRR	1
5:421455:G:T	eQTLcatalogue	Fairfax_2014_LPS24	ENSG00000063438	G	1.26852e-11	-0.16398	6.3426e-08	T	+	5	421455	AHRR	1
5:422178:A:G	eQTLcatalogue	Fairfax_2014_LPS24	ENSG00000063438	G	4.51966e-15	-0.179734	2.25983e-11	A	+	5	422178	AHRR	1
5:423169:C:T	eQTLcatalogue	Fairfax_2014_LPS24	ENSG00000063438	C	4.24061e-15	-0.179418	2.12031e-11	T	+	5	423169	AHRR	1
5:423595:C:T	eQTLcatalogue	Fairfax_2014_LPS24	ENSG00000063438	C	4.13421e-15	-0.179434	2.06711e-11	T	+	5	423595	AHRR	1
5:423671:C:T	eQTLcatalogue	Fairfax_2014_LPS24	ENSG00000063438	C	4.09628e-15	-0.179445	2.04814e-11	T	+	5	423671	AHRR	1
5:423906:A:G	eQTLcatalogue	Fairfax_2014_LPS24	ENSG00000063438	G	4.06227e-15	-0.179456	2.03114e-11	A	+	5	423906	AHRR	1
5:428236:A:C	eQTLcatalogue	Fairfax_2014_LPS24	ENSG00000063438	C	3.53055e-15	-0.178887	1.76527e-11	A	+	5	428236	AHRR	1
5:429124:C:G	eQTLcatalogue	Fairfax_2014_LPS24	ENSG00000063438	C	2.90529e-15	-0.179419	1.45264e-11	G	+	5	429124	AHRR	1
5:429818:C:G	eQTLcatalogue	Fairfax_2014_LPS24	ENSG00000063438	C	2.33808e-15	-0.179974	1.16904e-11	G	+	5	429818	AHRR	1
5:430059:A:G	eQTLcatalogue	Fairfax_2014_LPS24	ENSG00000063438	G	2.27431e-15	-0.180037	1.13715e-11	A	+	5	430059	AHRR	1
5:430217:C:T	eQTLcatalogue	Fairfax_2014_LPS24	ENSG00000063438	C	3.48695e-09	-0.133113	1.74347e-05	T	+	5	430217	AHRR	1
5:434722:C:G	eQTLcatalogue	Fairfax_2014_LPS24	ENSG00000063438	G	1.56074e-15	-0.179735	7.8037e-12	C	+	5	434722	AHRR	1
5:436981:A:G	eQTLcatalogue	Fairfax_2014_LPS24	ENSG00000063438	A	3.69476e-15	-0.18382	1.84738e-11	G	+	5	436981	AHRR	1
5:437542:C:T	eQTLcatalogue	Fairfax_2014_LPS24	ENSG00000063438	T	1.45971e-15	-0.180904	7.29855e-12	C	+	5	437542	AHRR	1
5:437586:A:G	eQTLcatalogue	Fairfax_2014_LPS24	ENSG00000063438	G	1.46076e-15	-0.180902	7.3038e-12	A	+	5	437586	AHRR	1
5:437667:A:G	eQTLcatalogue	Fairfax_2014_LPS24	ENSG00000063438	G	1.46184e-15	-0.180901	7.3092e-12	A	+	5	437667	AHRR	1
5:437862:C:G	eQTLcatalogue	Fairfax_2014_LPS24	ENSG00000063438	G	1.46943e-15	-0.180889	7.34715e-12	C	+	5	437862	AHRR	1
10:126679510:A:G	eQTLcatalogue	Fairfax_2014_LPS24	ENSG00000019995	A	7.8889e-36	0.68372	3.94445e-32	A	+	10	126679510	ZRANB1	1
10:126679510:A:G	eQTLcatalogue	Fairfax_2014_LPS24	ENSG00000175029	A	2.43976e-07	0.173619	0.00121988	A	+	10	126679510	CTBP2	1
10:126685539:A:G	eQTLcatalogue	Fairfax_2014_LPS24	ENSG00000019995	G	2.88628e-32	0.632201	1.44314e-28	G	+	10	126685539	ZRANB1	1
10:126685539:A:G	eQTLcatalogue	Fairfax_2014_LPS24	ENSG00000175029	G	6.75033e-07	0.161613	0.00337516	G	+	10	126685539	CTBP2	1
10:126687613:C:T	eQTLcatalogue	Fairfax_2014_LPS24	ENSG00000019995	T	3.06299e-32	0.631897	1.53149e-28	T	+	10	126687613	ZRANB1	1
10:126687613:C:T	eQTLcatalogue	Fairfax_2014_LPS24	ENSG00000175029	T	6.41311e-07	0.1619	0.00320655	T	+	10	126687613	CTBP2	1
10:126711259:A:G	eQTLcatalogue	Fairfax_2014_LPS24	ENSG00000019995	A	2.1532e-23	0.553341	1.0766e-19	A	+	10	126711259	ZRANB1	1
10:126713026:A:G	eQTLcatalogue	Fairfax_2014_LPS24	ENSG00000019995	A	3.30341e-23	0.550351	1.65171e-19	A	+	10	126713026	ZRANB1	1
10:126714169:C:T	eQTLcatalogue	Fairfax_2014_LPS24	ENSG00000019995	C	1.15193e-22	0.54309	5.75965e-19	C	+	10	126714169	ZRANB1	1
10:126718244:C:T	eQTLcatalogue	Fairfax_2014_LPS24	ENSG00000019995	C	5.69296e-23	0.54583	2.84648e-19	C	+	10	126718244	ZRANB1	1
10:126721819:A:C	eQTLcatalogue	Fairfax_2014_LPS24	ENSG00000019995	C	5.66972e-23	0.545805	2.83486e-19	C	+	10	126721819	ZRANB1	1
10:126722149:C:G	eQTLcatalogue	Fairfax_2014_LPS24	ENSG00000019995	C	6.10189e-23	0.542951	3.05095e-19	C	+	10	126722149	ZRANB1	1
10:126722453:C:T	eQTLcatalogue	Fairfax_2014_LPS24	ENSG00000019995	C	5.68114e-23	0.545738	2.84057e-19	C	+	10	126722453	ZRANB1	1
10:126723939:A:G	eQTLcatalogue	Fairfax_2014_LPS24	ENSG00000019995	G	5.68857e-23	0.545733	2.84429e-19	G	+	10	126723939	ZRANB1	1
10:126726979:C:T	eQTLcatalogue	Fairfax_2014_LPS24	ENSG00000019995	C	5.69837e-23	0.545714	2.84918e-19	C	+	10	126726979	ZRANB1	1
10:126727268:A:C	eQTLcatalogue	Fairfax_2014_LPS24	ENSG00000019995	A	5.69837e-23	0.545714	2.84918e-19	A	+	10	126727268	ZRANB1	1
10:126730827:A:G	eQTLcatalogue	Fairfax_2014_LPS24	ENSG00000019995	A	3.87244e-23	0.550054	1.93622e-19	A	+	10	126730827	ZRANB1	1
10:126733276:C:T	eQTLcatalogue	Fairfax_2014_LPS24	ENSG00000019995	C	5.25792e-24	0.564713	2.62896e-20	C	+	10	126733276	ZRANB1	1
10:126737566:C:G	eQTLcatalogue	Fairfax_2014_LPS24	ENSG00000019995	G	2.05119e-23	0.562889	1.0256e-19	G	+	10	126737566	ZRANB1	1
11:457879:C:T	eQTLcatalogue	Fairfax_2014_LPS24	ENSG00000023191	C	9.55562e-07	-0.176495	0.00477781	C	-	11	457879	RNH1	1
11:458595:A:G	eQTLcatalogue	Fairfax_2014_LPS24	ENSG00000023191	G	5.4737e-14	-0.178621	2.73685e-10	G	-	11	458595	RNH1	1
11:460765:A:G	eQTLcatalogue	Fairfax_2014_LPS24	ENSG00000023191	A	1.29385e-12	-0.162868	6.46925e-09	A	-	11	460765	RNH1	1
11:460765:A:G	eQTLcatalogue	Fairfax_2014_LPS24	ENSG00000099849	A	9.3928e-06	0.15194	0.046964	A	+	11	460765	RASSF7	1
11:462684:C:T	eQTLcatalogue	Fairfax_2014_LPS24	ENSG00000023191	C	3.69074e-14	-0.179294	1.84537e-10	C	-	11	462684	RNH1	1
11:462855:A:G	eQTLcatalogue	Fairfax_2014_LPS24	ENSG00000023191	G	1.21581e-12	-0.163006	6.07905e-09	G	-	11	462855	RNH1	1
11:462855:A:G	eQTLcatalogue	Fairfax_2014_LPS24	ENSG00000099849	G	9.6138e-06	0.151733	0.048069	G	+	11	462855	RASSF7	1
11:467368:A:G	eQTLcatalogue	Fairfax_2014_LPS24	ENSG00000023191	A	1.02644e-12	-0.163264	5.1322e-09	A	-	11	467368	RNH1	1
11:473300:G:T	eQTLcatalogue	Fairfax_2014_LPS24	ENSG00000023191	G	9.28425e-13	-0.163262	4.64213e-09	G	-	11	473300	RNH1	1
11:477623:C:T	eQTLcatalogue	Fairfax_2014_LPS24	ENSG00000023191	C	9.18105e-13	-0.163221	4.59052e-09	C	-	11	477623	RNH1	1
11:484469:C:T	eQTLcatalogue	Fairfax_2014_LPS24	ENSG00000023191	C	9.32286e-13	-0.163271	4.66143e-09	C	-	11	484469	RNH1	1
11:486414:A:G	eQTLcatalogue	Fairfax_2014_LPS24	ENSG00000023191	G	9.34489e-13	-0.163341	4.67244e-09	G	-	11	486414	RNH1	1
11:487101:C:T	eQTLcatalogue	Fairfax_2014_LPS24	ENSG00000023191	C	9.44595e-13	-0.163262	4.72297e-09	C	-	11	487101	RNH1	1
11:487136:A:G	eQTLcatalogue	Fairfax_2014_LPS24	ENSG00000023191	G	8.60508e-14	-0.175567	4.30254e-10	G	-	11	487136	RNH1	1
11:487201:C:T	eQTLcatalogue	Fairfax_2014_LPS24	ENSG00000023191	T	9.413e-13	-0.163289	4.7065e-09	T	-	11	487201	RNH1	1
11:490035:C:T	eQTLcatalogue	Fairfax_2014_LPS24	ENSG00000023191	C	4.51685e-13	-0.180512	2.25843e-09	C	-	11	490035	RNH1	1
11:490035:C:T	eQTLcatalogue	Fairfax_2014_LPS24	ENSG00000099849	C	5.48522e-06	0.169448	0.0274261	C	+	11	490035	RASSF7	1
11:491334:A:C	eQTLcatalogue	Fairfax_2014_LPS24	ENSG00000023191	A	2.39305e-12	-0.159994	1.19653e-08	A	-	11	491334	RNH1	1
11:491334:A:C	eQTLcatalogue	Fairfax_2014_LPS24	ENSG00000099849	A	7.29233e-06	0.152735	0.0364617	A	+	11	491334	RASSF7	1
11:494662:A:G	eQTLcatalogue	Fairfax_2014_LPS24	ENSG00000023191	G	2.39067e-12	-0.159941	1.19534e-08	G	-	11	494662	RNH1	1
11:494662:A:G	eQTLcatalogue	Fairfax_2014_LPS24	ENSG00000099849	G	7.24664e-06	0.152726	0.0362332	G	+	11	494662	RASSF7	1
11:495699:A:C	eQTLcatalogue	Fairfax_2014_LPS24	ENSG00000023191	A	2.39011e-12	-0.159945	1.19505e-08	A	-	11	495699	RNH1	1
11:495699:A:C	eQTLcatalogue	Fairfax_2014_LPS24	ENSG00000099849	A	7.25629e-06	0.15272	0.0362814	A	+	11	495699	RASSF7	1
11:495892:C:G	eQTLcatalogue	Fairfax_2014_LPS24	ENSG00000023191	C	2.39011e-12	-0.159945	1.19505e-08	C	-	11	495892	RNH1	1
11:495892:C:G	eQTLcatalogue	Fairfax_2014_LPS24	ENSG00000099849	C	7.25629e-06	0.15272	0.0362814	C	+	11	495892	RASSF7	1
11:496193:G:T	eQTLcatalogue	Fairfax_2014_LPS24	ENSG00000023191	T	2.31108e-12	-0.16036	1.15554e-08	T	-	11	496193	RNH1	1
11:496193:G:T	eQTLcatalogue	Fairfax_2014_LPS24	ENSG00000099849	T	6.40116e-06	0.153903	0.0320058	T	+	11	496193	RASSF7	1
11:501468:A:G	eQTLcatalogue	Fairfax_2014_LPS24	ENSG00000023191	G	2.38257e-12	-0.159971	1.19129e-08	G	-	11	501468	RNH1	1
11:501468:A:G	eQTLcatalogue	Fairfax_2014_LPS24	ENSG00000099849	G	7.26417e-06	0.152728	0.0363208	G	+	11	501468	RASSF7	1
11:502371:A:G	eQTLcatalogue	Fairfax_2014_LPS24	ENSG00000023191	G	2.3819e-12	-0.159984	1.19095e-08	G	-	11	502371	RNH1	1
11:502371:A:G	eQTLcatalogue	Fairfax_2014_LPS24	ENSG00000099849	G	7.26022e-06	0.152744	0.0363011	G	+	11	502371	RASSF7	1
11:503385:C:G	eQTLcatalogue	Fairfax_2014_LPS24	ENSG00000023191	C	2.39006e-12	-0.160051	1.19503e-08	C	-	11	503385	RNH1	1
11:503385:C:G	eQTLcatalogue	Fairfax_2014_LPS24	ENSG00000099849	C	7.27508e-06	0.152803	0.0363754	C	+	11	503385	RASSF7	1
11:503710:C:T	eQTLcatalogue	Fairfax_2014_LPS24	ENSG00000023191	C	2.38602e-12	-0.16007	1.19301e-08	C	-	11	503710	RNH1	1
11:503710:C:T	eQTLcatalogue	Fairfax_2014_LPS24	ENSG00000099849	C	7.27795e-06	0.152813	0.0363897	C	+	11	503710	RASSF7	1
11:504411:C:G	eQTLcatalogue	Fairfax_2014_LPS24	ENSG00000023191	C	2.40149e-12	-0.160118	1.20075e-08	C	-	11	504411	RNH1	1
11:504411:C:G	eQTLcatalogue	Fairfax_2014_LPS24	ENSG00000099849	C	7.2864e-06	0.15287	0.036432	C	+	11	504411	RASSF7	1
11:506229:C:T	eQTLcatalogue	Fairfax_2014_LPS24	ENSG00000023191	C	2.39394e-12	-0.160242	1.19697e-08	C	-	11	506229	RNH1	1
11:506229:C:T	eQTLcatalogue	Fairfax_2014_LPS24	ENSG00000099849	C	7.30765e-06	0.152959	0.0365383	C	+	11	506229	RASSF7	1
11:506442:G:T	eQTLcatalogue	Fairfax_2014_LPS24	ENSG00000023191	G	2.40715e-12	-0.160255	1.20357e-08	G	-	11	506442	RNH1	1
11:506442:G:T	eQTLcatalogue	Fairfax_2014_LPS24	ENSG00000099849	G	7.32978e-06	0.152965	0.0366489	G	+	11	506442	RASSF7	1
11:506596:C:T	eQTLcatalogue	Fairfax_2014_LPS24	ENSG00000023191	C	2.40763e-12	-0.160257	1.20381e-08	C	-	11	506596	RNH1	1
11:506596:C:T	eQTLcatalogue	Fairfax_2014_LPS24	ENSG00000099849	C	7.32316e-06	0.152974	0.0366158	C	+	11	506596	RASSF7	1
12:48213991:C:T	eQTLcatalogue	Fairfax_2014_LPS24	ENSG00000061273	C	3.75564e-06	0.0867407	0.0187782	T	-	12	48213991	HDAC7	1
12:48214833:A:C	eQTLcatalogue	Fairfax_2014_LPS24	ENSG00000061273	C	5.87221e-06	0.0848945	0.029361	A	-	12	48214833	HDAC7	1
12:48223554:C:G	eQTLcatalogue	Fairfax_2014_LPS24	ENSG00000061273	C	1.4032e-06	0.0889693	0.007016	G	-	12	48223554	HDAC7	1
14:74480794:C:G	eQTLcatalogue	Fairfax_2014_LPS24	ENSG00000119723	G	1.34285e-07	-0.112401	0.000671425	C	+	14	74480794	COQ6	1
14:74485133:C:T	eQTLcatalogue	Fairfax_2014_LPS24	ENSG00000119723	C	1.78147e-07	-0.110959	0.000890735	T	+	14	74485133	COQ6	1
5:416118:A:G	eQTLcatalogue	Fairfax_2014_LPS2	ENSG00000063438	G	8.22831e-06	-0.0964479	0.0411415	A	+	5	416118	AHRR	1
5:416672:A:G	eQTLcatalogue	Fairfax_2014_LPS2	ENSG00000063438	G	8.15702e-06	-0.0965845	0.0407851	A	+	5	416672	AHRR	1
5:418494:A:G	eQTLcatalogue	Fairfax_2014_LPS2	ENSG00000063438	A	8.0708e-06	-0.0966181	0.040354	G	+	5	418494	AHRR	1
5:421193:C:G	eQTLcatalogue	Fairfax_2014_LPS2	ENSG00000063438	G	8.99137e-06	-0.0951703	0.0449568	C	+	5	421193	AHRR	1
5:421455:G:T	eQTLcatalogue	Fairfax_2014_LPS2	ENSG00000063438	G	8.61882e-06	-0.0964587	0.0430941	T	+	5	421455	AHRR	1
5:422178:A:G	eQTLcatalogue	Fairfax_2014_LPS2	ENSG00000063438	G	1.36889e-07	-0.107427	0.000684445	A	+	5	422178	AHRR	1
5:423169:C:T	eQTLcatalogue	Fairfax_2014_LPS2	ENSG00000063438	C	1.43466e-07	-0.107062	0.00071733	T	+	5	423169	AHRR	1
5:423595:C:T	eQTLcatalogue	Fairfax_2014_LPS2	ENSG00000063438	C	1.41707e-07	-0.107084	0.000708535	T	+	5	423595	AHRR	1
5:423671:C:T	eQTLcatalogue	Fairfax_2014_LPS2	ENSG00000063438	C	1.41096e-07	-0.107094	0.00070548	T	+	5	423671	AHRR	1
5:423906:A:G	eQTLcatalogue	Fairfax_2014_LPS2	ENSG00000063438	G	1.40604e-07	-0.107101	0.00070302	A	+	5	423906	AHRR	1
5:428236:A:C	eQTLcatalogue	Fairfax_2014_LPS2	ENSG00000063438	C	1.2043e-07	-0.107141	0.00060215	A	+	5	428236	AHRR	1
5:429124:C:G	eQTLcatalogue	Fairfax_2014_LPS2	ENSG00000063438	C	1.1715e-07	-0.107266	0.00058575	G	+	5	429124	AHRR	1
5:429818:C:G	eQTLcatalogue	Fairfax_2014_LPS2	ENSG00000063438	C	1.1459e-07	-0.107345	0.00057295	G	+	5	429818	AHRR	1
5:430059:A:G	eQTLcatalogue	Fairfax_2014_LPS2	ENSG00000063438	G	1.1437e-07	-0.107347	0.00057185	A	+	5	430059	AHRR	1
5:434722:C:G	eQTLcatalogue	Fairfax_2014_LPS2	ENSG00000063438	G	9.58153e-08	-0.107122	0.000479076	C	+	5	434722	AHRR	1
5:436981:A:G	eQTLcatalogue	Fairfax_2014_LPS2	ENSG00000063438	A	6.32589e-06	-0.0943452	0.0316295	G	+	5	436981	AHRR	1
5:437542:C:T	eQTLcatalogue	Fairfax_2014_LPS2	ENSG00000063438	T	1.19021e-07	-0.107003	0.000595105	C	+	5	437542	AHRR	1
5:437586:A:G	eQTLcatalogue	Fairfax_2014_LPS2	ENSG00000063438	G	1.19102e-07	-0.107001	0.00059551	A	+	5	437586	AHRR	1
5:437667:A:G	eQTLcatalogue	Fairfax_2014_LPS2	ENSG00000063438	G	1.19214e-07	-0.106998	0.00059607	A	+	5	437667	AHRR	1
5:437862:C:G	eQTLcatalogue	Fairfax_2014_LPS2	ENSG00000063438	G	1.19688e-07	-0.106986	0.00059844	C	+	5	437862	AHRR	1
10:126679510:A:G	eQTLcatalogue	Fairfax_2014_LPS2	ENSG00000019995	A	4.94304e-28	0.722262	2.47152e-24	A	+	10	126679510	ZRANB1	1
10:126685539:A:G	eQTLcatalogue	Fairfax_2014_LPS2	ENSG00000019995	G	3.84095e-24	0.656462	1.92048e-20	G	+	10	126685539	ZRANB1	1
10:126687613:C:T	eQTLcatalogue	Fairfax_2014_LPS2	ENSG00000019995	T	4.47106e-24	0.65518	2.23553e-20	T	+	10	126687613	ZRANB1	1
10:126711259:A:G	eQTLcatalogue	Fairfax_2014_LPS2	ENSG00000019995	A	2.20779e-18	0.572436	1.1039e-14	A	+	10	126711259	ZRANB1	1
10:126713026:A:G	eQTLcatalogue	Fairfax_2014_LPS2	ENSG00000019995	A	2.22161e-18	0.572355	1.11081e-14	A	+	10	126713026	ZRANB1	1
10:126714169:C:T	eQTLcatalogue	Fairfax_2014_LPS2	ENSG00000019995	C	3.19494e-18	0.570317	1.59747e-14	C	+	10	126714169	ZRANB1	1
10:126718244:C:T	eQTLcatalogue	Fairfax_2014_LPS2	ENSG00000019995	C	2.23782e-18	0.572338	1.11891e-14	C	+	10	126718244	ZRANB1	1
10:126721819:A:C	eQTLcatalogue	Fairfax_2014_LPS2	ENSG00000019995	C	2.23118e-18	0.572333	1.11559e-14	C	+	10	126721819	ZRANB1	1
10:126722149:C:G	eQTLcatalogue	Fairfax_2014_LPS2	ENSG00000019995	C	3.28767e-17	0.551731	1.64384e-13	C	+	10	126722149	ZRANB1	1
10:126722453:C:T	eQTLcatalogue	Fairfax_2014_LPS2	ENSG00000019995	C	2.23549e-18	0.572257	1.11774e-14	C	+	10	126722453	ZRANB1	1
10:126723939:A:G	eQTLcatalogue	Fairfax_2014_LPS2	ENSG00000019995	G	2.26357e-18	0.572268	1.13178e-14	G	+	10	126723939	ZRANB1	1
10:126726979:C:T	eQTLcatalogue	Fairfax_2014_LPS2	ENSG00000019995	C	7.06234e-18	0.561841	3.53117e-14	C	+	10	126726979	ZRANB1	1
10:126727268:A:C	eQTLcatalogue	Fairfax_2014_LPS2	ENSG00000019995	A	7.70181e-18	0.560906	3.85091e-14	A	+	10	126727268	ZRANB1	1
10:126730827:A:G	eQTLcatalogue	Fairfax_2014_LPS2	ENSG00000019995	A	5.46104e-18	0.5661	2.73052e-14	A	+	10	126730827	ZRANB1	1
10:126733276:C:T	eQTLcatalogue	Fairfax_2014_LPS2	ENSG00000019995	C	4.46364e-18	0.569276	2.23182e-14	C	+	10	126733276	ZRANB1	1
10:126737566:C:G	eQTLcatalogue	Fairfax_2014_LPS2	ENSG00000019995	G	7.24216e-18	0.573824	3.62108e-14	G	+	10	126737566	ZRANB1	1
11:457879:C:T	eQTLcatalogue	Fairfax_2014_LPS2	ENSG00000023191	C	2.66458e-06	-0.157369	0.0133229	C	-	11	457879	RNH1	1
11:458595:A:G	eQTLcatalogue	Fairfax_2014_LPS2	ENSG00000023191	G	8.91547e-08	-0.114532	0.000445773	G	-	11	458595	RNH1	1
11:460765:A:G	eQTLcatalogue	Fairfax_2014_LPS2	ENSG00000023191	A	2.03864e-07	-0.109183	0.00101932	A	-	11	460765	RNH1	1
11:462684:C:T	eQTLcatalogue	Fairfax_2014_LPS2	ENSG00000023191	C	8.86198e-08	-0.114223	0.000443099	C	-	11	462684	RNH1	1
11:462855:A:G	eQTLcatalogue	Fairfax_2014_LPS2	ENSG00000023191	G	1.92877e-07	-0.109334	0.000964385	G	-	11	462855	RNH1	1
11:467368:A:G	eQTLcatalogue	Fairfax_2014_LPS2	ENSG00000023191	A	1.66941e-07	-0.109607	0.000834705	A	-	11	467368	RNH1	1
11:473300:G:T	eQTLcatalogue	Fairfax_2014_LPS2	ENSG00000023191	G	1.57743e-07	-0.109424	0.000788715	G	-	11	473300	RNH1	1
11:477623:C:T	eQTLcatalogue	Fairfax_2014_LPS2	ENSG00000023191	C	1.64281e-07	-0.109088	0.000821405	C	-	11	477623	RNH1	1
11:484469:C:T	eQTLcatalogue	Fairfax_2014_LPS2	ENSG00000023191	C	1.66798e-07	-0.109097	0.00083399	C	-	11	484469	RNH1	1
11:486414:A:G	eQTLcatalogue	Fairfax_2014_LPS2	ENSG00000023191	G	1.7003e-07	-0.109086	0.00085015	G	-	11	486414	RNH1	1
11:487101:C:T	eQTLcatalogue	Fairfax_2014_LPS2	ENSG00000023191	C	1.68923e-07	-0.109073	0.000844615	C	-	11	487101	RNH1	1
11:487136:A:G	eQTLcatalogue	Fairfax_2014_LPS2	ENSG00000023191	G	1.19935e-07	-0.111813	0.000599675	G	-	11	487136	RNH1	1
11:487201:C:T	eQTLcatalogue	Fairfax_2014_LPS2	ENSG00000023191	T	1.68448e-07	-0.109098	0.00084224	T	-	11	487201	RNH1	1
11:490035:C:T	eQTLcatalogue	Fairfax_2014_LPS2	ENSG00000023191	C	2.33117e-08	-0.127909	0.000116558	C	-	11	490035	RNH1	1
11:491334:A:C	eQTLcatalogue	Fairfax_2014_LPS2	ENSG00000023191	A	1.63804e-07	-0.109135	0.00081902	A	-	11	491334	RNH1	1
11:494662:A:G	eQTLcatalogue	Fairfax_2014_LPS2	ENSG00000023191	G	1.64281e-07	-0.109088	0.000821405	G	-	11	494662	RNH1	1
11:495699:A:C	eQTLcatalogue	Fairfax_2014_LPS2	ENSG00000023191	A	1.64283e-07	-0.109091	0.000821415	A	-	11	495699	RNH1	1
11:495892:C:G	eQTLcatalogue	Fairfax_2014_LPS2	ENSG00000023191	C	1.64283e-07	-0.109091	0.000821415	C	-	11	495892	RNH1	1
11:496193:G:T	eQTLcatalogue	Fairfax_2014_LPS2	ENSG00000023191	T	1.56104e-07	-0.109426	0.00078052	T	-	11	496193	RNH1	1
11:501468:A:G	eQTLcatalogue	Fairfax_2014_LPS2	ENSG00000023191	G	1.64368e-07	-0.109102	0.00082184	G	-	11	501468	RNH1	1
11:502371:A:G	eQTLcatalogue	Fairfax_2014_LPS2	ENSG00000023191	G	1.63779e-07	-0.109122	0.000818895	G	-	11	502371	RNH1	1
11:503385:C:G	eQTLcatalogue	Fairfax_2014_LPS2	ENSG00000023191	C	1.61753e-07	-0.109229	0.000808765	C	-	11	503385	RNH1	1
11:503710:C:T	eQTLcatalogue	Fairfax_2014_LPS2	ENSG00000023191	C	1.61588e-07	-0.109242	0.00080794	C	-	11	503710	RNH1	1
11:504411:C:G	eQTLcatalogue	Fairfax_2014_LPS2	ENSG00000023191	C	1.60484e-07	-0.109316	0.00080242	C	-	11	504411	RNH1	1
11:506229:C:T	eQTLcatalogue	Fairfax_2014_LPS2	ENSG00000023191	C	1.58155e-07	-0.109461	0.000790775	C	-	11	506229	RNH1	1
11:506442:G:T	eQTLcatalogue	Fairfax_2014_LPS2	ENSG00000023191	G	1.58144e-07	-0.109484	0.00079072	G	-	11	506442	RNH1	1
11:506596:C:T	eQTLcatalogue	Fairfax_2014_LPS2	ENSG00000023191	C	1.58119e-07	-0.109487	0.000790595	C	-	11	506596	RNH1	1
14:74480794:C:G	eQTLcatalogue	Fairfax_2014_LPS2	ENSG00000119723	G	6.73461e-06	-0.110362	0.033673	C	+	14	74480794	COQ6	1
14:74485133:C:T	eQTLcatalogue	Fairfax_2014_LPS2	ENSG00000119723	C	8.44863e-06	-0.108774	0.0422432	T	+	14	74485133	COQ6	1
2:68385097:A:G	eQTLcatalogue	Fairfax_2014_naive	ENSG00000243667	A	7.52256e-09	-0.0629652	3.76128e-05	G	+	2	68385097	WDR92	1
2:68385097:A:G	eQTLcatalogue	Fairfax_2014_naive	ENSG00000221823	A	7.86972e-28	0.152095	3.93486e-24	G	-	2	68385097	PPP3R1	1
2:68393144:A:T	eQTLcatalogue	Fairfax_2014_naive	ENSG00000243667	T	1.15616e-08	-0.0625303	5.7808e-05	A	+	2	68393144	WDR92	1
2:68393144:A:T	eQTLcatalogue	Fairfax_2014_naive	ENSG00000221823	T	3.82185e-31	0.1609	1.91092e-27	A	-	2	68393144	PPP3R1	1
2:68394184:C:T	eQTLcatalogue	Fairfax_2014_naive	ENSG00000243667	C	1.19202e-08	-0.0624326	5.9601e-05	T	+	2	68394184	WDR92	1
2:68394184:C:T	eQTLcatalogue	Fairfax_2014_naive	ENSG00000221823	C	3.65904e-31	0.160834	1.82952e-27	T	-	2	68394184	PPP3R1	1
2:68395631:A:G	eQTLcatalogue	Fairfax_2014_naive	ENSG00000243667	G	1.23106e-08	-0.0623141	6.1553e-05	A	+	2	68395631	WDR92	1
2:68395631:A:G	eQTLcatalogue	Fairfax_2014_naive	ENSG00000221823	G	3.55537e-31	0.160706	1.77768e-27	A	-	2	68395631	PPP3R1	1
2:68398919:C:G	eQTLcatalogue	Fairfax_2014_naive	ENSG00000243667	G	1.27385e-08	-0.0622331	6.36925e-05	C	+	2	68398919	WDR92	1
2:68398919:C:G	eQTLcatalogue	Fairfax_2014_naive	ENSG00000221823	G	3.16219e-31	0.160773	1.58109e-27	C	-	2	68398919	PPP3R1	1
2:68399190:C:T	eQTLcatalogue	Fairfax_2014_naive	ENSG00000243667	C	1.3211e-08	-0.0620244	6.6055e-05	T	+	2	68399190	WDR92	1
2:68399190:C:T	eQTLcatalogue	Fairfax_2014_naive	ENSG00000221823	C	3.49317e-31	0.160303	1.74658e-27	T	-	2	68399190	PPP3R1	1
2:68402012:G:T	eQTLcatalogue	Fairfax_2014_naive	ENSG00000243667	G	1.43938e-08	-0.0617171	7.1969e-05	T	+	2	68402012	WDR92	1
2:68402012:G:T	eQTLcatalogue	Fairfax_2014_naive	ENSG00000221823	G	3.48174e-31	0.159909	1.74087e-27	T	-	2	68402012	PPP3R1	1
2:68402830:C:G	eQTLcatalogue	Fairfax_2014_naive	ENSG00000243667	G	1.43979e-08	-0.061718	7.19895e-05	C	+	2	68402830	WDR92	1
2:68402830:C:G	eQTLcatalogue	Fairfax_2014_naive	ENSG00000221823	G	3.4825e-31	0.159913	1.74125e-27	C	-	2	68402830	PPP3R1	1
2:68410372:A:C	eQTLcatalogue	Fairfax_2014_naive	ENSG00000243667	C	1.46787e-08	-0.0617863	7.33935e-05	A	+	2	68410372	WDR92	1
2:68410372:A:C	eQTLcatalogue	Fairfax_2014_naive	ENSG00000221823	C	3.46062e-31	0.160186	1.73031e-27	A	-	2	68410372	PPP3R1	1
2:68410660:G:T	eQTLcatalogue	Fairfax_2014_naive	ENSG00000243667	T	1.47053e-08	-0.0617849	7.35265e-05	G	+	2	68410660	WDR92	1
2:68410660:G:T	eQTLcatalogue	Fairfax_2014_naive	ENSG00000221823	T	3.44824e-31	0.160194	1.72412e-27	G	-	2	68410660	PPP3R1	1
2:68411414:A:G	eQTLcatalogue	Fairfax_2014_naive	ENSG00000243667	G	1.46898e-08	-0.0617885	7.3449e-05	A	+	2	68411414	WDR92	1
2:68411414:A:G	eQTLcatalogue	Fairfax_2014_naive	ENSG00000221823	G	3.4521e-31	0.160198	1.72605e-27	A	-	2	68411414	PPP3R1	1
2:68418868:A:T	eQTLcatalogue	Fairfax_2014_naive	ENSG00000243667	A	1.46293e-08	-0.0618325	7.31465e-05	T	+	2	68418868	WDR92	1
2:68418868:A:T	eQTLcatalogue	Fairfax_2014_naive	ENSG00000221823	A	3.41144e-31	0.160304	1.70572e-27	T	-	2	68418868	PPP3R1	1
2:68419487:A:G	eQTLcatalogue	Fairfax_2014_naive	ENSG00000243667	G	1.46307e-08	-0.0618329	7.31535e-05	A	+	2	68419487	WDR92	1
2:68419487:A:G	eQTLcatalogue	Fairfax_2014_naive	ENSG00000221823	G	3.41983e-31	0.160303	1.70992e-27	A	-	2	68419487	PPP3R1	1
2:68420070:G:T	eQTLcatalogue	Fairfax_2014_naive	ENSG00000243667	G	1.46247e-08	-0.061834	7.31235e-05	T	+	2	68420070	WDR92	1
2:68420070:G:T	eQTLcatalogue	Fairfax_2014_naive	ENSG00000221823	G	3.40418e-31	0.160309	1.70209e-27	T	-	2	68420070	PPP3R1	1
2:68421049:A:G	eQTLcatalogue	Fairfax_2014_naive	ENSG00000243667	G	1.4604e-08	-0.0618361	7.302e-05	A	+	2	68421049	WDR92	1
2:68421049:A:G	eQTLcatalogue	Fairfax_2014_naive	ENSG00000221823	G	3.41247e-31	0.160305	1.70623e-27	A	-	2	68421049	PPP3R1	1
2:68422771:A:G	eQTLcatalogue	Fairfax_2014_naive	ENSG00000243667	G	1.45891e-08	-0.0618356	7.29455e-05	A	+	2	68422771	WDR92	1
2:68422771:A:G	eQTLcatalogue	Fairfax_2014_naive	ENSG00000221823	G	3.39414e-31	0.160305	1.69707e-27	A	-	2	68422771	PPP3R1	1
2:68423530:A:G	eQTLcatalogue	Fairfax_2014_naive	ENSG00000243667	G	1.45681e-08	-0.061835	7.28405e-05	A	+	2	68423530	WDR92	1
2:68423530:A:G	eQTLcatalogue	Fairfax_2014_naive	ENSG00000221823	G	3.4017e-31	0.160294	1.70085e-27	A	-	2	68423530	PPP3R1	1
2:68430925:C:T	eQTLcatalogue	Fairfax_2014_naive	ENSG00000243667	C	1.44065e-08	-0.0617633	7.20325e-05	T	+	2	68430925	WDR92	1
2:68430925:C:T	eQTLcatalogue	Fairfax_2014_naive	ENSG00000221823	C	3.46076e-31	0.160039	1.73038e-27	T	-	2	68430925	PPP3R1	1
2:68431259:A:G	eQTLcatalogue	Fairfax_2014_naive	ENSG00000243667	G	1.44071e-08	-0.0617587	7.20355e-05	A	+	2	68431259	WDR92	1
2:68431259:A:G	eQTLcatalogue	Fairfax_2014_naive	ENSG00000221823	G	3.44401e-31	0.160032	1.722e-27	A	-	2	68431259	PPP3R1	1
2:68433831:A:G	eQTLcatalogue	Fairfax_2014_naive	ENSG00000243667	G	1.44044e-08	-0.0617146	7.2022e-05	A	+	2	68433831	WDR92	1
2:68433831:A:G	eQTLcatalogue	Fairfax_2014_naive	ENSG00000221823	G	3.48277e-31	0.159906	1.74138e-27	A	-	2	68433831	PPP3R1	1
2:68435431:C:G	eQTLcatalogue	Fairfax_2014_naive	ENSG00000243667	C	1.42103e-08	-0.0619251	7.10515e-05	G	+	2	68435431	WDR92	1
2:68435431:C:G	eQTLcatalogue	Fairfax_2014_naive	ENSG00000221823	C	3.79337e-31	0.160302	1.89669e-27	G	-	2	68435431	PPP3R1	1
2:68438614:C:T	eQTLcatalogue	Fairfax_2014_naive	ENSG00000243667	C	1.49612e-08	-0.0621298	7.4806e-05	T	+	2	68438614	WDR92	1
2:68438614:C:T	eQTLcatalogue	Fairfax_2014_naive	ENSG00000221823	C	4.60072e-31	0.160879	2.30036e-27	T	-	2	68438614	PPP3R1	1
2:68439960:C:T	eQTLcatalogue	Fairfax_2014_naive	ENSG00000243667	C	1.46289e-08	-0.0623811	7.31445e-05	T	+	2	68439960	WDR92	1
2:68439960:C:T	eQTLcatalogue	Fairfax_2014_naive	ENSG00000221823	C	9.3229e-31	0.160707	4.66145e-27	T	-	2	68439960	PPP3R1	1
2:68443651:A:G	eQTLcatalogue	Fairfax_2014_naive	ENSG00000243667	A	1.41184e-08	-0.0628248	7.0592e-05	G	+	2	68443651	WDR92	1
2:68443651:A:G	eQTLcatalogue	Fairfax_2014_naive	ENSG00000221823	A	1.33651e-30	0.161313	6.68255e-27	G	-	2	68443651	PPP3R1	1
2:68443835:A:T	eQTLcatalogue	Fairfax_2014_naive	ENSG00000243667	A	1.51068e-08	-0.0625918	7.5534e-05	T	+	2	68443835	WDR92	1
2:68443835:A:T	eQTLcatalogue	Fairfax_2014_naive	ENSG00000221823	A	1.18605e-30	0.161154	5.93025e-27	T	-	2	68443835	PPP3R1	1
2:68446936:C:T	eQTLcatalogue	Fairfax_2014_naive	ENSG00000243667	C	1.60573e-08	-0.0625735	8.02865e-05	T	+	2	68446936	WDR92	1
2:68446936:C:T	eQTLcatalogue	Fairfax_2014_naive	ENSG00000221823	C	8.5556e-31	0.16173	4.2778e-27	T	-	2	68446936	PPP3R1	1
2:68457573:C:T	eQTLcatalogue	Fairfax_2014_naive	ENSG00000243667	C	1.96722e-08	-0.0628527	9.8361e-05	T	+	2	68457573	WDR92	1
2:68457573:C:T	eQTLcatalogue	Fairfax_2014_naive	ENSG00000221823	C	2.22266e-30	0.162433	1.11133e-26	T	-	2	68457573	PPP3R1	1
2:68457854:A:G	eQTLcatalogue	Fairfax_2014_naive	ENSG00000243667	A	1.45218e-08	-0.063509	7.2609e-05	G	+	2	68457854	WDR92	1
2:68457854:A:G	eQTLcatalogue	Fairfax_2014_naive	ENSG00000221823	A	1.54657e-30	0.163051	7.73285e-27	G	-	2	68457854	PPP3R1	1
2:68463612:A:G	eQTLcatalogue	Fairfax_2014_naive	ENSG00000243667	G	2.29633e-08	-0.0628438	0.000114816	A	+	2	68463612	WDR92	1
2:68463612:A:G	eQTLcatalogue	Fairfax_2014_naive	ENSG00000221823	G	4.82054e-30	0.162343	2.41027e-26	A	-	2	68463612	PPP3R1	1
2:68467910:A:C	eQTLcatalogue	Fairfax_2014_naive	ENSG00000243667	A	2.48306e-08	-0.062781	0.000124153	C	+	2	68467910	WDR92	1
2:68467910:A:C	eQTLcatalogue	Fairfax_2014_naive	ENSG00000221823	A	7.11658e-30	0.162148	3.55829e-26	C	-	2	68467910	PPP3R1	1
2:68475595:A:C	eQTLcatalogue	Fairfax_2014_naive	ENSG00000243667	C	3.14498e-08	-0.0624771	0.000157249	A	+	2	68475595	WDR92	1
2:68475595:A:C	eQTLcatalogue	Fairfax_2014_naive	ENSG00000221823	C	2.01297e-29	0.161405	1.00648e-25	A	-	2	68475595	PPP3R1	1
2:68477248:C:T	eQTLcatalogue	Fairfax_2014_naive	ENSG00000243667	T	2.85132e-08	-0.0629733	0.000142566	C	+	2	68477248	WDR92	1
2:68477248:C:T	eQTLcatalogue	Fairfax_2014_naive	ENSG00000221823	T	2.68642e-29	0.161888	1.34321e-25	C	-	2	68477248	PPP3R1	1
2:68478919:A:G	eQTLcatalogue	Fairfax_2014_naive	ENSG00000243667	A	6.75069e-08	-0.0614498	0.000337534	G	+	2	68478919	WDR92	1
2:68478919:A:G	eQTLcatalogue	Fairfax_2014_naive	ENSG00000221823	A	1.11001e-28	0.160717	5.55005e-25	G	-	2	68478919	PPP3R1	1
2:238877170:C:G	eQTLcatalogue	Fairfax_2014_naive	ENSG00000184182	C	7.1734e-07	0.0388388	0.0035867	C	+	2	238877170	UBE2F	1
2:238877409:A:C	eQTLcatalogue	Fairfax_2014_naive	ENSG00000184182	A	6.82946e-07	0.0388393	0.00341473	A	+	2	238877409	UBE2F	1
2:238893362:C:T	eQTLcatalogue	Fairfax_2014_naive	ENSG00000184182	T	5.90601e-07	0.0394148	0.00295301	T	+	2	238893362	UBE2F	1
2:238895507:A:G	eQTLcatalogue	Fairfax_2014_naive	ENSG00000184182	G	5.70363e-07	0.0395515	0.00285182	G	+	2	238895507	UBE2F	1
2:238907642:A:C	eQTLcatalogue	Fairfax_2014_naive	ENSG00000184182	A	4.68946e-07	0.0402224	0.00234473	A	+	2	238907642	UBE2F	1
2:238909269:A:G	eQTLcatalogue	Fairfax_2014_naive	ENSG00000184182	A	4.55591e-07	0.0403203	0.00227795	A	+	2	238909269	UBE2F	1
2:238910663:C:T	eQTLcatalogue	Fairfax_2014_naive	ENSG00000184182	T	4.46859e-07	0.0403908	0.00223429	T	+	2	238910663	UBE2F	1
2:238912120:A:C	eQTLcatalogue	Fairfax_2014_naive	ENSG00000184182	A	4.3907e-07	0.0404457	0.00219535	A	+	2	238912120	UBE2F	1
2:238912478:A:G	eQTLcatalogue	Fairfax_2014_naive	ENSG00000184182	G	4.34385e-07	0.0404792	0.00217192	G	+	2	238912478	UBE2F	1
2:238922585:G:T	eQTLcatalogue	Fairfax_2014_naive	ENSG00000184182	G	3.83678e-07	0.0408432	0.00191839	G	+	2	238922585	UBE2F	1
2:238930632:A:G	eQTLcatalogue	Fairfax_2014_naive	ENSG00000184182	A	2.95666e-07	0.0412694	0.00147833	A	+	2	238930632	UBE2F	1
2:238932389:A:G	eQTLcatalogue	Fairfax_2014_naive	ENSG00000184182	G	3.34888e-07	0.0411925	0.00167444	G	+	2	238932389	UBE2F	1
2:238939370:C:T	eQTLcatalogue	Fairfax_2014_naive	ENSG00000184182	C	6.62132e-08	0.0434015	0.000331066	C	+	2	238939370	UBE2F	1
3:153992586:A:G	eQTLcatalogue	Fairfax_2014_naive	ENSG00000174953	A	9.02832e-09	-0.077678	4.51416e-05	G	+	3	153992586	DHX36	1
3:153992586:A:G	eQTLcatalogue	Fairfax_2014_naive	ENSG00000174953	A	7.15263e-08	-0.0840928	0.000357632	G	+	3	153992586	DHX36	1
3:154004009:C:T	eQTLcatalogue	Fairfax_2014_naive	ENSG00000174953	T	1.06998e-08	-0.077463	5.3499e-05	C	+	3	154004009	DHX36	1
3:154004009:C:T	eQTLcatalogue	Fairfax_2014_naive	ENSG00000174953	T	8.39879e-08	-0.0838285	0.00041994	C	+	3	154004009	DHX36	1
3:154009933:C:T	eQTLcatalogue	Fairfax_2014_naive	ENSG00000174953	T	8.89361e-09	-0.0777323	4.4468e-05	C	+	3	154009933	DHX36	1
3:154009933:C:T	eQTLcatalogue	Fairfax_2014_naive	ENSG00000174953	T	7.03146e-08	-0.0841622	0.000351573	C	+	3	154009933	DHX36	1
3:154036196:A:G	eQTLcatalogue	Fairfax_2014_naive	ENSG00000174953	A	6.55825e-09	-0.0785192	3.27913e-05	G	+	3	154036196	DHX36	1
3:154036196:A:G	eQTLcatalogue	Fairfax_2014_naive	ENSG00000174953	A	5.25964e-08	-0.0850762	0.000262982	G	+	3	154036196	DHX36	1
3:154036657:C:T	eQTLcatalogue	Fairfax_2014_naive	ENSG00000174953	C	6.45559e-09	-0.0785747	3.2278e-05	T	+	3	154036657	DHX36	1
3:154036657:C:T	eQTLcatalogue	Fairfax_2014_naive	ENSG00000174953	C	5.19038e-08	-0.0851346	0.000259519	T	+	3	154036657	DHX36	1
3:154040273:A:G	eQTLcatalogue	Fairfax_2014_naive	ENSG00000174953	G	6.32756e-09	-0.0785798	3.16378e-05	A	+	3	154040273	DHX36	1
3:154040273:A:G	eQTLcatalogue	Fairfax_2014_naive	ENSG00000174953	G	5.09643e-08	-0.085142	0.000254822	A	+	3	154040273	DHX36	1
5:405576:A:G	eQTLcatalogue	Fairfax_2014_naive	ENSG00000180104	G	1.57954e-21	-0.100078	7.8977e-18	A	+	5	405576	EXOC3	1
5:408529:C:T	eQTLcatalogue	Fairfax_2014_naive	ENSG00000180104	C	2.63325e-21	-0.0990468	1.31662e-17	T	+	5	408529	EXOC3	1
5:410943:A:G	eQTLcatalogue	Fairfax_2014_naive	ENSG00000180104	A	2.68944e-21	-0.0990119	1.34472e-17	G	+	5	410943	EXOC3	1
5:411361:A:G	eQTLcatalogue	Fairfax_2014_naive	ENSG00000180104	G	2.68944e-21	-0.0990119	1.34472e-17	A	+	5	411361	EXOC3	1
5:412112:C:T	eQTLcatalogue	Fairfax_2014_naive	ENSG00000180104	C	2.20657e-21	-0.0992836	1.10328e-17	T	+	5	412112	EXOC3	1
5:413591:A:G	eQTLcatalogue	Fairfax_2014_naive	ENSG00000180104	G	1.91666e-20	-0.097502	9.5833e-17	A	+	5	413591	EXOC3	1
5:416118:A:G	eQTLcatalogue	Fairfax_2014_naive	ENSG00000180104	G	5.59769e-24	-0.107358	2.79885e-20	A	+	5	416118	EXOC3	1
5:416672:A:G	eQTLcatalogue	Fairfax_2014_naive	ENSG00000180104	G	4.2426e-24	-0.107615	2.1213e-20	A	+	5	416672	EXOC3	1
5:418093:A:G	eQTLcatalogue	Fairfax_2014_naive	ENSG00000180104	A	1.14935e-14	-0.114516	5.74675e-11	G	+	5	418093	EXOC3	1
5:418494:A:G	eQTLcatalogue	Fairfax_2014_naive	ENSG00000180104	A	1.66057e-24	-0.1083	8.30285e-21	G	+	5	418494	EXOC3	1
5:421193:C:G	eQTLcatalogue	Fairfax_2014_naive	ENSG00000180104	G	2.2214e-21	-0.102144	1.1107e-17	C	+	5	421193	EXOC3	1
5:421403:A:G	eQTLcatalogue	Fairfax_2014_naive	ENSG00000180104	G	7.87126e-24	-0.107296	3.93563e-20	A	+	5	421403	EXOC3	1
5:421426:A:C	eQTLcatalogue	Fairfax_2014_naive	ENSG00000180104	A	2.14387e-14	-0.115576	1.07193e-10	C	+	5	421426	EXOC3	1
5:421455:G:T	eQTLcatalogue	Fairfax_2014_naive	ENSG00000180104	G	7.41838e-25	-0.10857	3.70919e-21	T	+	5	421455	EXOC3	1
5:422178:A:G	eQTLcatalogue	Fairfax_2014_naive	ENSG00000180104	G	1.62795e-38	-0.12744	8.13975e-35	A	+	5	422178	EXOC3	1
5:423169:C:T	eQTLcatalogue	Fairfax_2014_naive	ENSG00000180104	C	1.69125e-38	-0.127103	8.45625e-35	T	+	5	423169	EXOC3	1
5:423595:C:T	eQTLcatalogue	Fairfax_2014_naive	ENSG00000180104	C	1.6115e-38	-0.127114	8.0575e-35	T	+	5	423595	EXOC3	1
5:423671:C:T	eQTLcatalogue	Fairfax_2014_naive	ENSG00000180104	C	1.58267e-38	-0.127122	7.91335e-35	T	+	5	423671	EXOC3	1
5:423906:A:G	eQTLcatalogue	Fairfax_2014_naive	ENSG00000180104	G	1.55708e-38	-0.127128	7.7854e-35	A	+	5	423906	EXOC3	1
5:428236:A:C	eQTLcatalogue	Fairfax_2014_naive	ENSG00000180104	C	7.37154e-39	-0.127079	3.68577e-35	A	+	5	428236	EXOC3	1
5:429124:C:G	eQTLcatalogue	Fairfax_2014_naive	ENSG00000180104	C	8.26829e-39	-0.127021	4.13414e-35	G	+	5	429124	EXOC3	1
5:429818:C:G	eQTLcatalogue	Fairfax_2014_naive	ENSG00000180104	C	9.80302e-39	-0.126912	4.90151e-35	G	+	5	429818	EXOC3	1
5:430059:A:G	eQTLcatalogue	Fairfax_2014_naive	ENSG00000180104	G	1.0045e-38	-0.126893	5.0225e-35	A	+	5	430059	EXOC3	1
5:430217:C:T	eQTLcatalogue	Fairfax_2014_naive	ENSG00000180104	C	1.02621e-28	-0.10883	5.13105e-25	T	+	5	430217	EXOC3	1
5:434722:C:G	eQTLcatalogue	Fairfax_2014_naive	ENSG00000180104	G	2.37889e-37	-0.124324	1.18944e-33	C	+	5	434722	EXOC3	1
5:436981:A:G	eQTLcatalogue	Fairfax_2014_naive	ENSG00000180104	A	8.31202e-36	-0.127122	4.15601e-32	G	+	5	436981	EXOC3	1
5:437542:C:T	eQTLcatalogue	Fairfax_2014_naive	ENSG00000180104	T	2.03873e-38	-0.126306	1.01937e-34	C	+	5	437542	EXOC3	1
5:437586:A:G	eQTLcatalogue	Fairfax_2014_naive	ENSG00000180104	G	2.03507e-38	-0.126308	1.01754e-34	A	+	5	437586	EXOC3	1
5:437667:A:G	eQTLcatalogue	Fairfax_2014_naive	ENSG00000180104	G	2.03083e-38	-0.12631	1.01541e-34	A	+	5	437667	EXOC3	1
5:437862:C:G	eQTLcatalogue	Fairfax_2014_naive	ENSG00000180104	G	2.02113e-38	-0.126313	1.01056e-34	C	+	5	437862	EXOC3	1
10:126679510:A:G	eQTLcatalogue	Fairfax_2014_naive	ENSG00000019995	A	7.30199e-48	0.406679	3.65099e-44	A	+	10	126679510	ZRANB1	1
10:126685539:A:G	eQTLcatalogue	Fairfax_2014_naive	ENSG00000019995	G	7.04723e-42	0.374182	3.52362e-38	G	+	10	126685539	ZRANB1	1
10:126687613:C:T	eQTLcatalogue	Fairfax_2014_naive	ENSG00000019995	T	7.51061e-42	0.374027	3.75531e-38	T	+	10	126687613	ZRANB1	1
10:126711259:A:G	eQTLcatalogue	Fairfax_2014_naive	ENSG00000019995	A	1.66958e-26	0.304884	8.3479e-23	A	+	10	126711259	ZRANB1	1
10:126713026:A:G	eQTLcatalogue	Fairfax_2014_naive	ENSG00000019995	A	4.88687e-26	0.302001	2.44343e-22	A	+	10	126713026	ZRANB1	1
10:126714169:C:T	eQTLcatalogue	Fairfax_2014_naive	ENSG00000019995	C	5.93964e-26	0.301052	2.96982e-22	C	+	10	126714169	ZRANB1	1
10:126718244:C:T	eQTLcatalogue	Fairfax_2014_naive	ENSG00000019995	C	1.11686e-25	0.29927	5.5843e-22	C	+	10	126718244	ZRANB1	1
10:126721819:A:C	eQTLcatalogue	Fairfax_2014_naive	ENSG00000019995	C	1.11591e-25	0.299255	5.57955e-22	C	+	10	126721819	ZRANB1	1
10:126722149:C:G	eQTLcatalogue	Fairfax_2014_naive	ENSG00000019995	C	3.25343e-25	0.295722	1.62671e-21	C	+	10	126722149	ZRANB1	1
10:126722453:C:T	eQTLcatalogue	Fairfax_2014_naive	ENSG00000019995	C	1.11634e-25	0.299231	5.5817e-22	C	+	10	126722453	ZRANB1	1
10:126723939:A:G	eQTLcatalogue	Fairfax_2014_naive	ENSG00000019995	G	1.03661e-25	0.299438	5.18305e-22	G	+	10	126723939	ZRANB1	1
10:126726979:C:T	eQTLcatalogue	Fairfax_2014_naive	ENSG00000019995	C	4.54713e-26	0.300353	2.27356e-22	C	+	10	126726979	ZRANB1	1
10:126727268:A:C	eQTLcatalogue	Fairfax_2014_naive	ENSG00000019995	A	4.52854e-26	0.30024	2.26427e-22	A	+	10	126727268	ZRANB1	1
10:126730827:A:G	eQTLcatalogue	Fairfax_2014_naive	ENSG00000019995	A	3.86081e-26	0.302194	1.9304e-22	A	+	10	126730827	ZRANB1	1
10:126733276:C:T	eQTLcatalogue	Fairfax_2014_naive	ENSG00000019995	C	6.8022e-27	0.309779	3.4011e-23	C	+	10	126733276	ZRANB1	1
10:126737566:C:G	eQTLcatalogue	Fairfax_2014_naive	ENSG00000019995	G	1.43865e-25	0.304868	7.19325e-22	G	+	10	126737566	ZRANB1	1
11:457879:C:T	eQTLcatalogue	Fairfax_2014_naive	ENSG00000023191	C	6.66883e-19	-0.2185	3.33441e-15	C	-	11	457879	RNH1	1
11:457879:C:T	eQTLcatalogue	Fairfax_2014_naive	ENSG00000099849	C	2.97983e-11	0.189902	1.48991e-07	C	+	11	457879	RASSF7	1
[truncated: 26,666 more rows]
