# Supplementary material for: Archaic Adaptive Introgression in Modern Human Reproductive Genes
Source: Research Square preprint supplement (doi:10.21203/rs.3.rs-5544119/v1), 2025-03-19
Supplement: Supplementary file 12 [file ed4c83848bc1a24b52e92bef.xlsx]

## Sheet: README
README: Gene enrichment results from Enrichr (Chen et al., 2013; Kuleshov et al., 2016; Xie et al., 2021) using genes listed in Supplemental Table 4. We focused on the Reactome 2022, KEGG 2021 Human, Go Biological Processes, and GO Molecular Function tables. The table is sorted by the adjusted p-value in ascending order of value.

## Sheet: Supplemental Table 10
Database	Term	P-value	Adjusted P-value	Odds Ratio	Combined Score	Genes
Reactome 2022	Formation Of Annular Gap Junctions R-HSA-196025	1.7642278783867052E-4	0.0232923	132.54485049833886	1145.5357354354971	DAB2;GJA1
Reactome 2022	Gap Junction Degradation R-HSA-190873	2.2021306777319987E-4	0.0232923	115.97093023255815	976.5813448480071	DAB2;GJA1
Reactome 2022	Constitutive Signaling By NOTCH1 HD+PEST Domain Mutants R-HSA-2894862	3.0119346093740446E-4	0.0232923	25.844155844155843	209.53815541422944	KAT2B;JAG1;HDAC7
Reactome 2022	RUNX3 Regulates NOTCH Signaling R-HSA-8941856	4.427775949754095E-4	0.0256811	77.2984	596.9328677908948	KAT2B;JAG1
Reactome 2022	Signaling By NOTCH1 R-HSA-1980143	6.170712577368036E-4	0.028632106358987688	20.004024144869216	147.84026154884708	KAT2B;JAG1;HDAC7
KEGG Human 2021	Notch signaling pathway	3.168309105090586E-4	0.0227535	25.381377551020407	204.50137150400965	KAT2B;JAG1;CTBP2
KEGG Human 2021	Wnt signaling pathway	5.2306868642659E-4	0.0227535	11.919903643480879	90.06438137902968	SFRP4;PPP3R1;CCND3;CTBP2
