# Supplementary material for: Archaic Adaptive Introgression in Modern Human Reproductive Genes
Source: Research Square preprint supplement (doi:10.21203/rs.3.rs-5544119/v1), 2025-03-19
Supplement: Supplementary file 13 [file f47d38afd714dcf23dfc7b1d.xlsx]

## Sheet: README
README: Gene enrichment results from ShinyGO (Ge et al., 2020) using genes regulated by archaic eQTLs as identified by FUMA GWAS (Watanabe et al., 2017; Watanabe et al., 2019). The table is sorted by the adjusted p-value in ascending order of value.

## Sheet: Supplemental Table 12
Enrichment FDR	nGenes	Pathway Genes	Fold Enrichment	Pathway	URL	Genes
0.00220055	6	115	11.3694	Path:hsa01200 Carbon metabolism	http://www.genome.jp/kegg-bin/show_pathway?hsa01200	GCK ALDH6A1 OGDH PGAM2 SDHA HKDC1
0.0220542	4	70	12.4522	Path:hsa05230 Central carbon metabolism in cancer	http://www.genome.jp/kegg-bin/show_pathway?hsa05230	GCK PDK1 PGAM2 HKDC1
0.0290256	3	36	18.1595	Path:hsa03030 DNA replication	http://www.genome.jp/kegg-bin/show_pathway?hsa03030	DNA2 RNASEH1 POLD2
